# Supplementary material for: Reductive acetogenesis is a dominant process in the ruminant hindgut
Source: Research Square preprint supplement (doi:10.21203/rs.3.rs-4473149/v1), 2024-06-10
Supplement: Supplementary file 1 [file 21d330545c9fa228471e6d9b.xlsx]

## Sheet: LDA analysis
Biomarker_names	Log_value	Groups	LDA_values	P_value
Bacteria.Firmicutes.Negativicutes.Acidaminococcales.Acidaminococcaceae.Phascolarctobacterium	3.826			2.52029173625e-07
Bacteria.Firmicutes.Clostridia.Peptostreptococcales_Tissierellales.Anaerovoracaceae	3.78614	Ce	4.2166	1.4057935181e-06
Bacteria.Bacteroidota.Bacteroidia.Bacteroidales.Prevotellaceae.Prevotellaceae_unclassified	3.937			4.68309993209e-07
Bacteria.Firmicutes.Clostridia.Lachnospirales.Lachnospiraceae.Butyrivibrio	4.37217			3.53174290043e-07
Bacteria.Spirochaetota	4.28815			9.64113830912e-07
Bacteria.Bacteroidota	5.63546	R	5.24189	1.4057935181e-06
Bacteria.Spirochaetota.Spirochaetia.Spirochaetales.Spirochaetaceae	4.28815			9.64113830912e-07
Bacteria.Bacteroidota.Bacteroidia.Bacteroidales.Rikenellaceae	4.93221			-
Bacteria.Firmicutes.Clostridia.Lachnospirales.Lachnospiraceae.Lachnospiraceae_AC2044_group	4.21356			3.53174290043e-07
Bacteria.Verrucomicrobiota.Verrucomicrobiae.Verrucomicrobiales.Akkermansiaceae.Akkermansia	4.79131	Ce	4.50308	5.92539397319e-07
Bacteria.Firmicutes.Clostridia.Peptostreptococcales_Tissierellales.Peptostreptococcaceae.Romboutsia	4.02259			9.37822509067e-07
Bacteria.Bacteroidota.Bacteroidia.Bacteroidales.Rikenellaceae.Alistipes	4.02751			3.53174290043e-07
Bacteria.Firmicutes.Clostridia.Oscillospirales.Oscillospirales_unclassified	4.1064			1.4057935181e-06
Bacteria.Firmicutes.Clostridia.Oscillospirales.Oscillospirales_fa.Oscillospirales_ge	4.9284	Ce	4.63244	1.4057935181e-06
Bacteria.Firmicutes.Clostridia.Christensenellales.Christensenellaceae	5.2412	Ce	4.75688	5.10662208694e-06
Bacteria.Bacteroidota.Bacteroidia	5.63546	R	5.24189	1.4057935181e-06
Bacteria.Firmicutes.Clostridia.Lachnospirales.Lachnospiraceae.Lachnospiraceae_unclassified	5.09233	Ce	4.52775	2.87093109587e-05
Bacteria.Firmicutes.Clostridia.Monoglobales	4.68997	Ce	4.38683	1.24003343104e-06
Bacteria.Firmicutes.Clostridia.Oscillospirales.Hungateiclostridiaceae.Saccharofermentans	4.67053	R	4.35879	1.4057935181e-06
Bacteria.Bacteria_unclassified	3.82381			0.0381824719137
Bacteria.Firmicutes.Clostridia.Clostridia_unclassified.Clostridia_unclassified	4.50313	Ce	4.21645	1.4057935181e-06
Bacteria.Bacteroidota.Bacteroidia.Bacteroidales.Prevotellaceae.Prevotellaceae_NK3B31_group	4.15846			2.52029173625e-07
Bacteria.Firmicutes.Negativicutes.Acidaminococcales.Acidaminococcaceae.Succiniclasticum	4.72809	R	4.43315	5.92539397319e-07
Bacteria.Spirochaetota.Spirochaetia	4.28815			9.64113830912e-07
Bacteria.Firmicutes.Negativicutes.Acidaminococcales	4.72809	R	4.37801	8.6959459421e-06
Bacteria.Bacteroidota.Bacteroidia.Bacteroidales.Muribaculaceae	4.83607	R	4.47287	3.55668082683e-06
Bacteria.Bacteroidota.Bacteroidia.Bacteroidales.Bacteroidales_unclassified.Bacteroidales_unclassified	3.92648			0.00119008038345
Bacteria.Firmicutes.Clostridia.Lachnospirales.Lachnospiraceae.Moryella	3.83955			2.52029173625e-07
Bacteria.Firmicutes.Clostridia.Peptostreptococcales_Tissierellales	4.22129			1.4057935181e-06
Bacteria.Verrucomicrobiota	4.79131	Ce	4.50309	5.92539397319e-07
Bacteria.Bacteria_unclassified.Bacteria_unclassified.Bacteria_unclassified.Bacteria_unclassified	3.82381			0.0381824719137
Bacteria.Firmicutes.Clostridia.Christensenellales.Christensenellaceae.Christensenellaceae_R_7_group	5.2412	Ce	4.75688	5.10662208694e-06
Bacteria.Firmicutes.Clostridia.Oscillospirales.UCG_010.UCG_010_ge	4.64245	Ce	4.33693	2.04623456792e-06
Bacteria.Verrucomicrobiota.Verrucomicrobiae.Verrucomicrobiales	4.79131	Ce	4.50308	5.92539397319e-07
Bacteria.Bacteria_unclassified.Bacteria_unclassified	3.82381			0.0381824719137
Bacteria.Bacteroidota.Bacteroidia.Bacteroidales	5.63546	R	5.24189	1.4057935181e-06
Bacteria.Firmicutes.Clostridia.Oscillospirales.Oscillospirales_unclassified.Oscillospirales_unclassified	4.1064			1.4057935181e-06
Bacteria.Firmicutes.Clostridia.Lachnospirales.Lachnospiraceae.probable_genus_10	4.23201	R	4.23599	3.53174290043e-07
Bacteria.Firmicutes.Negativicutes.Veillonellales_Selenomonadales	4.26767			2.52029173625e-07
Bacteria.Firmicutes.Clostridia.Oscillospirales.Oscillospiraceae.Oscillospiraceae_unclassified	4.33305			1.4057935181e-06
Bacteria.Bacteria_unclassified.Bacteria_unclassified.Bacteria_unclassified.Bacteria_unclassified.Bacteria_unclassified	3.82381			0.0381824719137
Bacteria.Firmicutes.Clostridia.Monoglobales.Monoglobaceae	4.68997	Ce	4.38683	1.24003343104e-06
Bacteria.Firmicutes.Clostridia.Oscillospirales.UCG_010	4.64245	Ce	4.33693	2.04623456792e-06
Bacteria.Firmicutes.Negativicutes.Veillonellales_Selenomonadales.Selenomonadaceae	4.26767			2.52029173625e-07
Bacteria.Firmicutes.Clostridia	5.9279	Ce	5.26487	2.46365449624e-06
Bacteria.Firmicutes	5.93134	Ce	5.18143	3.55668082683e-06
Bacteria.Firmicutes.Clostridia.Oscillospirales.Ruminococcaceae.Ruminococcus	4.16292			-
Bacteria.Firmicutes.Clostridia.Monoglobales.Monoglobaceae.Monoglobus	4.68997	Ce	4.38683	1.24003343104e-06
Bacteria.Firmicutes.Clostridia.Oscillospirales	5.61416	Ce	5.19688	1.4057935181e-06
Bacteria.Firmicutes.Clostridia.Oscillospirales.Hungateiclostridiaceae	4.67053	R	4.35879	1.4057935181e-06
Bacteria.Firmicutes.Clostridia.Clostridia_UCG_014.Clostridia_UCG_014_fa.Clostridia_UCG_014_ge	4.57268			2.43049606948e-05
Bacteria.Firmicutes.Clostridia.Christensenellales	5.2412	Ce	4.75688	5.10662208694e-06
Bacteria.Bacteria_unclassified.Bacteria_unclassified.Bacteria_unclassified	3.82381			0.0381824719137
Bacteria.Firmicutes.Clostridia.Lachnospirales.Lachnospiraceae.Lachnospiraceae_XPB1014_group	5.13606	R	4.86316	4.68309993209e-07
Bacteria.Firmicutes.Negativicutes.Acidaminococcales.Acidaminococcaceae	4.72809	R	4.37801	8.6959459421e-06
Bacteria.Firmicutes.Clostridia.Clostridia_UCG_014	4.57268			2.43049606948e-05
Bacteria.Bacteroidota.Bacteroidia.Bacteroidales.Prevotellaceae.Prevotella	5.32786	R	5.01956	7.20257661383e-07
Bacteria.Firmicutes.Clostridia.Oscillospirales.Ruminococcaceae.Ruminococcaceae_unclassified	4.3086			1.69721198133e-06
Bacteria.Bacteroidota.Bacteroidia.Bacteroidales.Prevotellaceae	5.37254	R	5.06349	9.64113830912e-07
Bacteria.Firmicutes.Clostridia.Oscillospirales.Oscillospiraceae.NK4A214_group	4.30417			-
Bacteria.Firmicutes.Negativicutes	4.85727	R	4.51395	4.26467744365e-06
Bacteria.Firmicutes.Clostridia.Lachnospirales.Lachnospiraceae.Lachnospiraceae_ge	3.98338	R	4.23001	1.66047212651e-06
Bacteria.Verrucomicrobiota.Verrucomicrobiae	4.79131	Ce	4.50308	5.92539397319e-07
Bacteria.Bacteroidota.Bacteroidia.Bacteroidales.Bacteroidales_unclassified	3.92648			0.00119008038345
Bacteria.Verrucomicrobiota.Verrucomicrobiae.Verrucomicrobiales.Akkermansiaceae	4.79131	Ce	4.50309	5.92539397319e-07
Bacteria.Firmicutes.Negativicutes.Veillonellales_Selenomonadales.Selenomonadaceae.Veillonellaceae_UCG_001	4.26767			2.52029173625e-07
Bacteria.Firmicutes.Clostridia.Peptostreptococcales_Tissierellales.Anaerovoracaceae.Family_XIII_AD3011_group	3.78614	Ce	4.2166	1.4057935181e-06
Bacteria.Spirochaetota.Spirochaetia.Spirochaetales	4.28815			9.64113830912e-07
Bacteria.Firmicutes.Clostridia.Clostridia_unclassified	4.50313	Ce	4.21645	1.4057935181e-06
Bacteria.Bacteroidota.Bacteroidia.Bacteroidales.Muribaculaceae.Muribaculaceae_ge	4.83607	R	4.47287	3.55668082683e-06
Bacteria.Firmicutes.Clostridia.Oscillospirales.Ruminococcaceae	4.48406			0.00175892306391
Bacteria.Bacteroidota.Bacteroidia.Bacteroidales.F082.F082_ge	4.52668			8.86785829959e-05
Bacteria.Bacteroidota.Bacteroidia.Bacteroidales.F082	4.52668			8.86785829959e-05
Bacteria.Firmicutes.Clostridia.Lachnospirales.Lachnospiraceae	5.46891	R	4.94275	6.10643575901e-06
Bacteria.Firmicutes.Clostridia.Oscillospirales.Oscillospirales_fa	4.9284	Ce	4.63244	1.4057935181e-06
Bacteria.Firmicutes.Clostridia.Peptostreptococcales_Tissierellales.Peptostreptococcaceae	4.02259			9.37822509067e-07
Bacteria.Firmicutes.Clostridia.Lachnospirales	5.46891	R	4.94275	6.10643575901e-06
Bacteria.Firmicutes.Clostridia.Lachnospirales.Lachnospiraceae.Lachnospiraceae_NK3A20_group	4.25889			1.4057935181e-06
Bacteria.Spirochaetota.Spirochaetia.Spirochaetales.Spirochaetaceae.Treponema	4.28815			9.64113830912e-07
Bacteria.Firmicutes.Clostridia.Lachnospirales.Lachnospiraceae.Pseudobutyrivibrio	4.00364			2.52029173625e-07
Bacteria.Bacteroidota.Bacteroidia.Bacteroidales.Rikenellaceae.Rikenellaceae_RC9_gut_group	4.93217			-
Bacteria.Firmicutes.Clostridia.Clostridia_unclassified.Clostridia_unclassified.Clostridia_unclassified	4.50313	Ce	4.21645	1.4057935181e-06
Bacteria.Firmicutes.Clostridia.Oscillospirales.Oscillospiraceae	5.37403	Ce	5.02359	1.4057935181e-06
Bacteria.Firmicutes.Clostridia.Oscillospirales.Oscillospiraceae.UCG_002	4.22487			1.4057935181e-06
Bacteria.Firmicutes.Clostridia.Oscillospirales.Oscillospiraceae.UCG_005	5.25467	Ce	4.94968	1.4057935181e-06
Bacteria	6			-
Bacteria.Firmicutes.Clostridia.Clostridia_UCG_014.Clostridia_UCG_014_fa	4.57268			2.43049606948e-05
