# Supplementary material for: Reductive acetogenesis is a dominant process in the ruminant hindgut
Source: Research Square preprint supplement (doi:10.21203/rs.3.rs-4473149/v1), 2024-06-10
Supplement: Supplementary file 2 [file 242ce75a06f68f00c55e5520.xlsx]

## Sheet: KOs
	Rumen			Cecum
KO ID	Mean	SD	SEM	Mean	SD	SEM	P value	FDR Adj PValue	Description
K00003	77.024	13.3901	3.34753	227.454	19.7518	4.93794	<.0001	5.38599e-06	hom; homoserine dehydrogenase [EC:1.1.1.3]
K00004	0.263284	0.152691	0.0381728	0.320936	0.475859	0.118965	0.4735	0.495769	BDH, butB; (R,R)-butanediol dehydrogenase / meso-butanediol dehydrogenase / diacetyl reductase [EC:1.1.1.4 1.1.1.- 1.1.1.303]
K00005	1.1406	0.566823	0.141706	16.8853	4.92071	1.23018	<.0001	5.38599e-06	gldA; glycerol dehydrogenase [EC:1.1.1.6]
K00008	2.57277	1.04758	0.261896	5.34308	2.35423	0.588558	0.0001	0.000201456	SORD, gutB; L-iditol 2-dehydrogenase [EC:1.1.1.14]
K00009	8.39783	3.67332	0.91833	57.2528	14.4363	3.60908	<.0001	5.38599e-06	mtlD; mannitol-1-phosphate 5-dehydrogenase [EC:1.1.1.17]
K00010	8.96208	4.14676	1.03669	26.4329	9.29495	2.32374	<.0001	1.42253e-05	iolG; myo-inositol 2-dehydrogenase / D-chiro-inositol 1-dehydrogenase [EC:1.1.1.18 1.1.1.369]
K00012	264.682	32.5572	8.13929	182.706	30.5103	7.62756	<.0001	2.64595e-05	UGDH, ugd; UDPglucose 6-dehydrogenase [EC:1.1.1.22]
K00013	131.28	29.8049	7.45122	160.765	16.1502	4.03754	0.0047	0.00701791	hisD; histidinol dehydrogenase [EC:1.1.1.23]
K00014	14.6927	8.55832	2.13958	22.8635	7.59545	1.89886	0.0014	0.00219027	aroE; shikimate dehydrogenase [EC:1.1.1.25]
K00015	0.0763995	0.121023	0.0302558	0.202092	0.20147	0.0503676	0.001	0.00170204	gyaR, GOR1; glyoxylate reductase [EC:1.1.1.26]
K00016	59.4097	14.8936	3.72339	121.075	30.9628	7.74071	<.0001	2.27944e-05	LDH, ldh; L-lactate dehydrogenase [EC:1.1.1.27]
K00018	125.018	29.2383	7.30956	184.055	21.6947	5.42367	<.0001	2.64595e-05	hprA; glycerate dehydrogenase [EC:1.1.1.29]
K00019	13.5929	6.54905	1.63726	0.88101	0.772357	0.193089	<.0001	5.38599e-06	E1.1.1.30, bdh; 3-hydroxybutyrate dehydrogenase [EC:1.1.1.30]
K00020	13.6134	3.84305	0.960764	28.5665	10.8092	2.7023	<.0001	6.40768e-05	mmsB, HIBADH; 3-hydroxyisobutyrate dehydrogenase [EC:1.1.1.31]
K00021	5.03158	7.04074	1.76018	5.49476	1.92615	0.481539	0.0262	0.0344475	HMGCR; hydroxymethylglutaryl-CoA reductase (NADPH) [EC:1.1.1.34]
K00023	0.13116	0.0730775	0.0182694	0.658077	0.632026	0.158007	<.0001	0.00013093	phbB; acetoacetyl-CoA reductase [EC:1.1.1.36]
K00024	31.3268	16.1033	4.02583	28.1044	14.7897	3.69742	0.5718	0.591757	mdh; malate dehydrogenase [EC:1.1.1.37]
K00027	114.771	34.9205	8.73012	133.974	21.0206	5.25515	0.05	0.0620713	ME2, sfcA, maeA; malate dehydrogenase (oxaloacetate-decarboxylating) [EC:1.1.1.38]
K00029	48.9606	19.1359	4.78397	15.4166	12.3134	3.07835	<.0001	3.0485e-05	E1.1.1.40, maeB; malate dehydrogenase (oxaloacetate-decarboxylating)(NADP+) [EC:1.1.1.40]
K00030	1.54389	1.30383	0.325958	8.39181	2.51436	0.628589	<.0001	5.38599e-06	IDH3; isocitrate dehydrogenase (NAD+) [EC:1.1.1.41]
K00031	110.828	25.7254	6.43134	117.363	17.2464	4.3116	0.4975	0.519495	IDH1, IDH2, icd; isocitrate dehydrogenase [EC:1.1.1.42]
K00033	23.4613	6.35744	1.58936	31.182	6.35873	1.58968	0.0009	0.00150255	PGD, gnd, gntZ; 6-phosphogluconate dehydrogenase [EC:1.1.1.44 1.1.1.343]
K00034	0.120418	0.062016	0.015504	0.543802	0.386034	0.0965085	<.0001	1.42253e-05	gdh; glucose 1-dehydrogenase [EC:1.1.1.47]
K00035	0.0386944	0.0304124	0.00760309	0.169969	0.154625	0.0386563	0.0005	0.000904344	gal; D-galactose 1-dehydrogenase [EC:1.1.1.48]
K00036	0.102155	0.0585405	0.0146351	2.24106	1.56435	0.391089	<.0001	5.38599e-06	G6PD, zwf; glucose-6-phosphate 1-dehydrogenase [EC:1.1.1.49 1.1.1.363]
K00038	0.0167703	0.0670812	0.0167703	0.519862	0.863815	0.215954	0.0002	0.000358077	E1.1.1.53; 3alpha(or 20beta)-hydroxysteroid dehydrogenase [EC:1.1.1.53]
K00039	0.0390037	0.0263059	0.00657648	0.143638	0.156354	0.0390885	0.0073	0.0106482	rbtD; ribitol 2-dehydrogenase [EC:1.1.1.56]
K00040	0	0	0	0.394749	1.53	0.382501	0.0079	0.0113948	uxuB; fructuronate reductase [EC:1.1.1.57]
K00041	94.8612	25.5155	6.37888	108.831	16.2286	4.05714	0.0899	0.105432	uxaB; tagaturonate reductase [EC:1.1.1.58]
K00042	2.97275	0.924107	0.231027	2.77945	1.51325	0.378311	0.2913	0.316677	garR, glxR; 2-hydroxy-3-oxopropionate reductase [EC:1.1.1.60]
K00043	0.0322537	0.0182905	0.00457263	0.0926661	0.114462	0.0286155	0.0935	0.109618	gbd; 4-hydroxybutyrate dehydrogenase [EC:1.1.1.61]
K00045	0.00688625	0.00904467	0.00226117	0.255105	0.305551	0.0763879	<.0001	5.38599e-06	E1.1.1.67, mtlK; mannitol 2-dehydrogenase [EC:1.1.1.67]
K00048	23.0914	6.91546	1.72886	95.5078	13.2798	3.31994	<.0001	5.38599e-06	fucO; lactaldehyde reductase [EC:1.1.1.77]
K00052	111.732	29.3161	7.32902	99.8968	18.3132	4.57829	0.2744	0.300173	leuB, IMDH; 3-isopropylmalate dehydrogenase [EC:1.1.1.85]
K00053	122.594	25.2157	6.30392	151.857	25.0865	6.27161	0.0033	0.00499536	ilvC; ketol-acid reductoisomerase [EC:1.1.1.86]
K00054	11.9517	6.66859	1.66715	7.4292	5.82806	1.45702	0.0458	0.0572048	mvaA; hydroxymethylglutaryl-CoA reductase [EC:1.1.1.88]
K00055	1.86839	0.755839	0.18896	0.993324	0.387138	0.0967844	0.0008	0.00132396	E1.1.1.90; aryl-alcohol dehydrogenase [EC:1.1.1.90]
K00057	168.267	29.2576	7.31439	222.974	16.3338	4.08345	<.0001	9.18181e-06	gpsA; glycerol-3-phosphate dehydrogenase (NAD(P)+) [EC:1.1.1.94]
K00058	47.2265	14.2096	3.5524	76.1298	14.7006	3.67515	<.0001	9.82894e-05	serA, PHGDH; D-3-phosphoglycerate dehydrogenase / 2-oxoglutarate reductase [EC:1.1.1.95 1.1.1.399]
K00059	304.626	62.335	15.5837	329.985	35.7212	8.93029	0.2913	0.316677	fabG, OAR1; 3-oxoacyl-[acyl-carrier protein] reductase [EC:1.1.1.100]
K00060	3.72343	1.85286	0.463215	44.3365	13.0108	3.25269	<.0001	5.38599e-06	tdh; threonine 3-dehydrogenase [EC:1.1.1.103]
K00064	0.0257826	0.021594	0.0053985	0.181271	0.197317	0.0493292	<.0001	0.00013093	E1.1.1.122; D-threo-aldose 1-dehydrogenase [EC:1.1.1.122]
K00065	1.50719	0.608194	0.152048	6.38712	2.36169	0.590421	<.0001	7.9474e-06	kduD; 2-dehydro-3-deoxy-D-gluconate 5-dehydrogenase [EC:1.1.1.127]
K00066	2.09254	2.78994	0.697484	0.377657	0.343767	0.0859418	0.0004	0.000691974	algD; GDP-mannose 6-dehydrogenase [EC:1.1.1.132]
K00067	220.592	33.4188	8.3547	156.197	24.8205	6.20512	<.0001	4.0984e-05	rfbD, rmlD; dTDP-4-dehydrorhamnose reductase [EC:1.1.1.133]
K00068	11.8406	4.27468	1.06867	28.3598	13.0694	3.26736	<.0001	5.56604e-05	srlD; sorbitol-6-phosphate 2-dehydrogenase [EC:1.1.1.140]
K00073	0.218941	0.695283	0.173821	1.49915	1.12202	0.280505	<.0001	4.78987e-05	allD; ureidoglycolate dehydrogenase (NAD+) [EC:1.1.1.350]
K00074	39.3215	12.3773	3.09434	35.3538	7.94921	1.9873	0.2913	0.316677	paaH, hbd, fadB, mmgB; 3-hydroxybutyryl-CoA dehydrogenase [EC:1.1.1.157]
K00075	255.926	35.4161	8.85402	306.216	23.1626	5.79064	<.0001	9.82894e-05	murB; UDP-N-acetylmuramate dehydrogenase [EC:1.3.1.98]
K00076	0	0	0	6.85132	1.7073	0.426826	<.0001	5.38599e-06	hdhA; 7-alpha-hydroxysteroid dehydrogenase [EC:1.1.1.159]
K00077	104.485	23.212	5.803	125.867	14.9	3.725	0.0067	0.00977542	panE, apbA; 2-dehydropantoate 2-reductase [EC:1.1.1.169]
K00078	86.2174	19.3569	4.83923	61.1627	25.6338	6.40845	0.0003	0.000608085	DHDH; dihydrodiol dehydrogenase / D-xylose 1-dehydrogenase (NADP) [EC:1.3.1.20 1.1.1.179]
K00086	0.0457292	0.0731293	0.0182823	0.938253	0.761644	0.190411	<.0001	7.657e-06	dhaT; 1,3-propanediol dehydrogenase [EC:1.1.1.202]
K00087	5.25312	2.88048	0.720121	6.56358	3.23012	0.807531	0.1223	0.141063	ygeS, xdhA; xanthine dehydrogenase molybdenum-binding subunit [EC:1.17.1.4]
K00088	199.414	44.6638	11.166	272.095	20.325	5.08124	<.0001	9.82894e-05	IMPDH, guaB; IMP dehydrogenase [EC:1.1.1.205]
K00090	0	0	0	0.155382	0.587971	0.146993	0.0171	0.0233006	ghrB; glyoxylate/hydroxypyruvate/2-ketogluconate reductase [EC:1.1.1.79 1.1.1.81 1.1.1.215]
K00094	0.0010295	0.004118	0.0010295	0.17786	0.677532	0.169383	0.1361	0.156287	E1.1.1.251, gatD; galactitol-1-phosphate 5-dehydrogenase [EC:1.1.1.251]
K00096	51.1394	12.2577	3.06443	180.992	28.7001	7.17503	<.0001	5.38599e-06	araM, egsA; glycerol-1-phosphate dehydrogenase [NAD(P)+] [EC:1.1.1.261]
K00097	0.394967	0.524061	0.131015	0.998201	2.94997	0.737493	0.8211	0.832007	pdxA; 4-hydroxythreonine-4-phosphate dehydrogenase [EC:1.1.1.262]
K00099	208.792	38.1442	9.53605	283.229	10.5769	2.64421	<.0001	1.42253e-05	dxr; 1-deoxy-D-xylulose-5-phosphate reductoisomerase [EC:1.1.1.267]
K00100	0.116804	0.10163	0.0254074	3.24093	2.88898	0.722245	<.0001	5.38599e-06	bdhAB; butanol dehydrogenase [EC:1.1.1.-]
K00101	0.0225588	0.0309471	0.00773677	0.140171	0.135456	0.033864	<.0001	7.87635e-05	lldD; L-lactate dehydrogenase (cytochrome) [EC:1.1.2.3]
K00102	0.0193994	0.0197158	0.00492894	0.0968948	0.107592	0.026898	0.0007	0.00114557	LDHD, dld; D-lactate dehydrogenase (cytochrome) [EC:1.1.2.4]
K00104	0.808757	0.47788	0.11947	12.965	12.2294	3.05735	<.0001	5.38599e-06	glcD; glycolate oxidase [EC:1.1.3.15]
K00108	0.000325812	0.00130325	0.000325812	0.114406	0.437794	0.109449	0.0251	0.0332224	betA, CHDH; choline dehydrogenase [EC:1.1.99.1]
K00109	0.0230413	0.0184395	0.00460987	0.132966	0.131929	0.0329823	0.0003	0.000531645	L2HGDH; 2-hydroxyglutarate dehydrogenase [EC:1.1.99.2]
K00111	95.1336	24.7376	6.18439	124.821	19.1119	4.77797	0.0009	0.00150255	glpA, glpD; glycerol-3-phosphate dehydrogenase [EC:1.1.5.3]
K00112	43.3749	18.7024	4.6756	16.9468	7.51117	1.87779	<.0001	6.40768e-05	glpB; glycerol-3-phosphate dehydrogenase subunit B [EC:1.1.5.3]
K00113	34.713	12.1045	3.02612	17.497	6.88257	1.72064	<.0001	0.000112898	glpC; glycerol-3-phosphate dehydrogenase subunit C
K00114	0.0968319	0.045071	0.0112678	0.509657	0.51936	0.12984	<.0001	1.04859e-05	exaA; alcohol dehydrogenase (cytochrome c) [EC:1.1.2.8]
K00116	0	0	0	2.56176	1.259	0.31475	<.0001	5.38599e-06	mqo; malate dehydrogenase (quinone) [EC:1.1.5.4]
K00117	0.0195381	0.0139793	0.00349482	0.250651	0.568792	0.142198	0.0009	0.00141432	gcd; quinoprotein glucose dehydrogenase [EC:1.1.5.2]
K00121	0.0454899	0.0241182	0.00602954	0.342759	0.532933	0.133233	<.0001	0.00013093	frmA, ADH5, adhC; S-(hydroxymethyl)glutathione dehydrogenase / alcohol dehydrogenase [EC:1.1.1.284 1.1.1.1]
K00122	0.0219026	0.0240556	0.00601389	0.0564458	0.0730676	0.0182669	0.2454	0.270529	FDH; formate dehydrogenase [EC:1.17.1.9]
K00123	8.46433	3.69736	0.92434	3.25235	2.67993	0.669983	<.0001	0.00013093	fdoG, fdhF, fdwA; formate dehydrogenase major subunit [EC:1.17.1.9]
K00124	0.95004	1.09761	0.274403	3.9312	3.22155	0.805387	<.0001	7.34758e-05	fdoH, fdsB; formate dehydrogenase iron-sulfur subunit
K00125	18.3641	11.6707	2.91767	63.6438	16.3177	4.07944	<.0001	1.42253e-05	fdhB; formate dehydrogenase (coenzyme F420) beta subunit [EC:1.17.98.3 1.8.98.6]
K00126	0.0249464	0.0318628	0.00796571	0.117216	0.126693	0.0316732	0.01	0.0143083	fdsD; formate dehydrogenase subunit delta [EC:1.17.1.9]
K00127	0.478887	1.17756	0.294391	0.882653	0.991811	0.247953	0.0015	0.00246344	fdoI, fdsG; formate dehydrogenase subunit gamma
K00128	0.51158	0.490275	0.122569	0.393596	0.426614	0.106654	0.083	0.0978632	ALDH; aldehyde dehydrogenase (NAD+) [EC:1.2.1.3]
K00130	0.112917	0.349811	0.0874527	0.153831	0.566849	0.141712	0.2983	0.324174	betB, gbsA; betaine-aldehyde dehydrogenase [EC:1.2.1.8]
K00131	0.289858	0.227187	0.0567967	3.89302	5.35575	1.33894	<.0001	3.52558e-05	gapN; glyceraldehyde-3-phosphate dehydrogenase (NADP+) [EC:1.2.1.9]
K00132	0.832581	0.324671	0.0811678	29.5015	10.2733	2.56832	<.0001	5.38599e-06	E1.2.1.10; acetaldehyde dehydrogenase (acetylating) [EC:1.2.1.10]
K00133	216.281	39.2815	9.82038	279.878	16.6214	4.15536	<.0001	3.52558e-05	asd; aspartate-semialdehyde dehydrogenase [EC:1.2.1.11]
K00134	220.294	40.6871	10.1718	287.799	27.8616	6.96541	<.0001	5.56604e-05	GAPDH, gapA; glyceraldehyde 3-phosphate dehydrogenase [EC:1.2.1.12]
K00135	0.16737	0.164159	0.0410397	0.286201	0.461811	0.115453	0.3271	0.348789	gabD; succinate-semialdehyde dehydrogenase / glutarate-semialdehyde dehydrogenase [EC:1.2.1.16 1.2.1.79 1.2.1.20]
K00137	0	0	0	0.10272	0.387777	0.0969444	0.0737	0.087769	prr; aminobutyraldehyde dehydrogenase [EC:1.2.1.19]
K00138	0.0256469	0.016748	0.004187	0.310839	0.660363	0.165091	0.0007	0.00116369	aldB; aldehyde dehydrogenase [EC:1.2.1.-]
K00140	2.79675	1.26745	0.316861	22.6982	9.34233	2.33558	<.0001	5.99662e-06	mmsA, iolA, ALDH6A1; malonate-semialdehyde dehydrogenase (acetylating) / methylmalonate-semialdehyde dehydrogenase [EC:1.2.1.18 1.2.1.27]
K00145	161.677	33.954	8.48851	224.989	14.3396	3.58489	<.0001	3.0485e-05	argC; N-acetyl-gamma-glutamyl-phosphate reductase [EC:1.2.1.38]
K00146	0	0	0	0.116722	0.441999	0.1105	0.0171	0.0233006	feaB; phenylacetaldehyde dehydrogenase [EC:1.2.1.39]
K00147	116.868	33.621	8.40526	161.122	21.0004	5.25011	0.0005	0.000904344	proA; glutamate-5-semialdehyde dehydrogenase [EC:1.2.1.41]
K00150	5.18021	7.43962	1.8599	5.43185	1.99363	0.498408	0.0348	0.0448219	gap2; glyceraldehyde-3-phosphate dehydrogenase (NAD(P)) [EC:1.2.1.59]
K00151	0.0274618	0.0188265	0.00470661	0.258709	0.526585	0.131646	<.0001	9.82894e-05	hpaE, hpcC; 5-carboxymethyl-2-hydroxymuconic-semialdehyde dehydrogenase [EC:1.2.1.60]
K00156	0.0218436	0.0148402	0.00371005	0.25079	0.536171	0.134043	<.0001	1.95324e-05	poxB; pyruvate dehydrogenase (quinone) [EC:1.2.5.1]
K00161	0.186944	0.106673	0.0266682	0.675299	0.587308	0.146827	<.0001	3.52558e-05	PDHA, pdhA; pyruvate dehydrogenase E1 component alpha subunit [EC:1.2.4.1]
K00162	0.15004	0.0871436	0.0217859	0.545122	0.509131	0.127283	0.0003	0.000531645	PDHB, pdhB; pyruvate dehydrogenase E1 component beta subunit [EC:1.2.4.1]
K00163	0.109353	0.0726451	0.0181613	0.685696	0.796265	0.199066	<.0001	3.0485e-05	aceE; pyruvate dehydrogenase E1 component [EC:1.2.4.1]
K00164	0.149908	0.1474	0.0368499	0.295997	0.524944	0.131236	0.2913	0.316677	OGDH, sucA; 2-oxoglutarate dehydrogenase E1 component [EC:1.2.4.2]
K00166	0.0186836	0.0233242	0.00583106	0.108727	0.159555	0.0398889	0.0004	0.000718795	BCKDHA, bkdA1; 2-oxoisovalerate dehydrogenase E1 component alpha subunit [EC:1.2.4.4]
K00167	0.037754	0.025148	0.006287	0.177604	0.165896	0.041474	0.0002	0.00033286	BCKDHB, bkdA2; 2-oxoisovalerate dehydrogenase E1 component beta subunit [EC:1.2.4.4]
K00169	40.6181	10.7948	2.69869	76.5835	18.9461	4.73652	<.0001	1.21479e-05	porA; pyruvate ferredoxin oxidoreductase alpha subunit [EC:1.2.7.1]
K00170	36.0711	9.42326	2.35581	42.2745	10.5759	2.64398	0.0765	0.0905693	porB; pyruvate ferredoxin oxidoreductase beta subunit [EC:1.2.7.1]
K00171	24.0728	6.9259	1.73147	29.7573	7.37253	1.84313	0.0348	0.0448219	porD; pyruvate ferredoxin oxidoreductase delta subunit [EC:1.2.7.1]
K00172	36.2394	9.90352	2.47588	69.3711	18.1686	4.54216	<.0001	1.21479e-05	porG; pyruvate ferredoxin oxidoreductase gamma subunit [EC:1.2.7.1]
K00174	255.055	56.5911	14.1478	246.988	26.3583	6.58958	0.7345	0.747591	korA, oorA, oforA; 2-oxoglutarate/2-oxoacid ferredoxin oxidoreductase subunit alpha [EC:1.2.7.3 1.2.7.11]
K00175	218.49	50.5534	12.6383	199.863	20.6744	5.16861	0.1748	0.195497	korB, oorB, oforB; 2-oxoglutarate/2-oxoacid ferredoxin oxidoreductase subunit beta [EC:1.2.7.3 1.2.7.11]
K00176	72.0392	12.9457	3.23644	97.3699	10.8549	2.71373	<.0001	2.27944e-05	korD, oorD; 2-oxoglutarate ferredoxin oxidoreductase subunit delta [EC:1.2.7.3]
K00177	132.088	24.2922	6.07305	181.992	23.8275	5.95688	<.0001	3.52558e-05	korC, oorC; 2-oxoglutarate ferredoxin oxidoreductase subunit gamma [EC:1.2.7.3]
K00184	0.420222	0.425568	0.106392	1.70929	1.03141	0.257854	<.0001	5.56604e-05	dmsB; dimethyl sulfoxide reductase iron-sulfur subunit
K00185	0.0295018	0.0208227	0.00520566	0.148487	0.137961	0.0344903	<.0001	6.83733e-05	dmsC; dimethyl sulfoxide reductase membrane subunit
K00186	4.27759	6.79997	1.69999	4.87701	1.81274	0.453185	0.0083	0.0119796	vorA; 2-oxoisovalerate ferredoxin oxidoreductase, alpha subunit [EC:1.2.7.7]
K00187	4.664	7.32359	1.8309	4.62684	1.94557	0.486392	0.0418	0.0526727	vorB; 2-oxoisovalerate ferredoxin oxidoreductase, beta subunit [EC:1.2.7.7]
K00188	2.63232	4.1683	1.04208	3.01986	1.30506	0.326264	0.0143	0.0199165	vorD; 2-oxoisovalerate ferredoxin oxidoreductase, delta subunit [EC:1.2.7.7]
K00194	2.88789	1.19884	0.29971	36.3694	11.5463	2.88658	<.0001	5.38599e-06	cdhD, acsD; acetyl-CoA decarbonylase/synthase, CODH/ACS complex subunit delta [EC:2.1.1.245]
K00196	1.04113	0.899614	0.224903	0.408074	0.609991	0.152498	0.0042	0.00625546	cooF; anaerobic carbon-monoxide dehydrogenase iron sulfur subunit
K00197	2.43011	1.03482	0.258704	33.2591	10.5906	2.64765	<.0001	5.38599e-06	cdhE, acsC; acetyl-CoA decarbonylase/synthase, CODH/ACS complex subunit gamma [EC:2.1.1.245]
K00198	7.09022	3.96213	0.990532	39.4371	14.327	3.58174	<.0001	5.38599e-06	cooS, acsA; anaerobic carbon-monoxide dehydrogenase catalytic subunit [EC:1.2.7.4]
K00200	5.91519	8.40379	2.10095	6.54533	2.3536	0.5884	0.0317	0.0410843	fwdA, fmdA; formylmethanofuran dehydrogenase subunit A [EC:1.2.7.12]
K00201	7.0196	9.42205	2.35551	7.84736	2.42044	0.605109	0.0176	0.0238336	fwdB, fmdB; formylmethanofuran dehydrogenase subunit B [EC:1.2.7.12]
K00202	5.39032	7.68134	1.92033	6.13987	2.32817	0.582043	0.0237	0.03148	fwdC, fmdC; formylmethanofuran dehydrogenase subunit C [EC:1.2.7.12]
K00203	5.44748	7.97226	1.99307	5.85102	1.97061	0.492653	0.0237	0.03148	fwdD, fmdD; formylmethanofuran dehydrogenase subunit D [EC:1.2.7.12]
K00204	5.02043	7.34161	1.8354	5.13899	2.07477	0.518692	0.0458	0.0572048	fwdH; 4Fe-4S ferredoxin
K00205	11.6622	16.9754	4.24384	12.2912	4.27779	1.06945	0.0382	0.0482745	fwdF, fmdF; 4Fe-4S ferredoxin
K00208	6.94936	4.17156	1.04289	27.6712	13.7142	3.42856	<.0001	1.21479e-05	fabI; enoyl-[acyl-carrier protein] reductase I [EC:1.3.1.9 1.3.1.10]
K00209	12.6639	7.444	1.861	4.06193	3.02749	0.756872	<.0001	0.000112898	fabV, ter; enoyl-[acyl-carrier protein] reductase / trans-2-enoyl-CoA reductase (NAD+) [EC:1.3.1.9 1.3.1.44]
K00215	188.033	34.7837	8.69592	260.112	15.2974	3.82434	<.0001	5.99662e-06	dapB; 4-hydroxy-tetrahydrodipicolinate reductase [EC:1.17.1.8]
K00216	0	0	0	0.106812	0.40871	0.102177	0.0737	0.087769	entA; 2,3-dihydro-2,3-dihydroxybenzoate dehydrogenase [EC:1.3.1.28]
K00217	0.0968116	0.0524661	0.0131165	0.394772	0.440126	0.110031	0.0001	0.000201456	E1.3.1.32; maleylacetate reductase [EC:1.3.1.32]
K00220	0.0273584	0.0260285	0.00650712	0.158575	0.181997	0.0454994	0.0003	0.00049334	tyrC; cyclohexadieny/prephenate dehydrogenase [EC:1.3.1.43 1.3.1.12]
K00226	0.0523999	0.100061	0.0250154	0.877864	1.20488	0.30122	0.0014	0.00226088	pyrD; dihydroorotate dehydrogenase (fumarate) [EC:1.3.98.1]
K00228	0.22799	0.108398	0.0270994	0.996696	0.878027	0.219507	<.0001	7.34758e-05	CPOX, hemF; coproporphyrinogen III oxidase [EC:1.3.3.3]
K00230	3.11428	1.9509	0.487726	18.2659	4.65618	1.16405	<.0001	5.38599e-06	hemG; menaquinone-dependent protoporphyrinogen oxidase [EC:1.3.5.3]
K00231	12.0257	8.80989	2.20247	6.86768	3.46594	0.866485	0.0288	0.0376366	PPOX, hemY; protoporphyrinogen/coproporphyrinogen III oxidase [EC:1.3.3.4 1.3.3.15]
K00239	69.51	17.8898	4.47245	53.2616	17.624	4.40601	0.0143	0.0199165	sdhA, frdA; succinate dehydrogenase / fumarate reductase, flavoprotein subunit [EC:1.3.5.1 1.3.5.4]
K00240	126.833	32.2839	8.07098	64.3948	20.1138	5.02845	<.0001	4.0984e-05	sdhB, frdB; succinate dehydrogenase / fumarate reductase, iron-sulfur subunit [EC:1.3.5.1 1.3.5.4]
K00241	134.894	29.0402	7.26005	71.2666	24.0335	6.00838	<.0001	4.0984e-05	sdhC, frdC; succinate dehydrogenase / fumarate reductase, cytochrome b subunit
K00242	0.0470744	0.0296721	0.00741803	0.33945	0.447241	0.11181	0.0003	0.000498681	sdhD, frdD; succinate dehydrogenase / fumarate reductase, membrane anchor subunit
K00244	1.01402	2.75781	0.689453	0.547312	2.09454	0.523635	0.0007	0.00110003	frdA; fumarate reductase flavoprotein subunit [EC:1.3.5.4]
K00245	1.2161	3.10792	0.776979	0.588904	2.26611	0.566527	0.0039	0.00585907	frdB; fumarate reductase iron-sulfur subunit [EC:1.3.5.4]
K00246	1.01616	2.35715	0.589287	0.465729	1.83393	0.458482	<.0001	0.00013093	frdC; fumarate reductase subunit C
K00247	0.820127	2.07417	0.518542	0.407508	1.58879	0.397198	0.0001	0.000268287	frdD; fumarate reductase subunit D
K00248	54.0721	13.7059	3.42648	51.1388	12.3027	3.07566	0.2913	0.316677	ACADS, bcd; butyryl-CoA dehydrogenase [EC:1.3.8.1]
K00249	7.39975	2.28977	0.572442	20.891	3.88799	0.971998	<.0001	5.38599e-06	ACADM, acd; acyl-CoA dehydrogenase [EC:1.3.8.7]
K00252	0.160441	0.078509	0.0196273	0.711075	0.628037	0.157009	<.0001	6.40768e-05	GCDH, gcdH; glutaryl-CoA dehydrogenase [EC:1.3.8.6]
K00253	0.0883255	0.0452627	0.0113157	0.559792	0.568162	0.142041	<.0001	3.0485e-05	IVD, ivd; isovaleryl-CoA dehydrogenase [EC:1.3.8.4]
K00254	11.3529	6.11413	1.52853	46.4832	13.7193	3.42982	<.0001	5.99662e-06	DHODH, pyrD; dihydroorotate dehydrogenase [EC:1.3.5.2]
K00259	51.0049	15.4966	3.87414	56.4099	9.61615	2.40404	0.3271	0.348789	ald; alanine dehydrogenase [EC:1.4.1.1]
K00260	0	0	0	0.0451363	0.0885983	0.0221496	0.0171	0.0233006	gudB, rocG; glutamate dehydrogenase [EC:1.4.1.2]
K00261	0.227047	0.19724	0.0493099	0.766035	0.410916	0.102729	<.0001	3.0485e-05	GLUD1_2, gdhA; glutamate dehydrogenase (NAD(P)+) [EC:1.4.1.3]
K00262	289.022	54.8585	13.7146	397.459	28.157	7.03925	<.0001	2.64595e-05	E1.4.1.4, gdhA; glutamate dehydrogenase (NADP+) [EC:1.4.1.4]
K00263	0.0211024	0.0202987	0.00507468	1.74499	1.48113	0.370283	<.0001	5.38599e-06	E1.4.1.9; leucine dehydrogenase [EC:1.4.1.9]
K00265	106.01	30.737	7.68424	43.5841	21.3254	5.33135	<.0001	1.95324e-05	gltB; glutamate synthase (NADPH) large chain [EC:1.4.1.13]
K00266	247.467	63.6684	15.9171	230.543	25.5736	6.3934	0.3657	0.387168	gltD; glutamate synthase (NADPH) small chain [EC:1.4.1.13]
K00273	0.027356	0.0237547	0.00593867	0.163062	0.211595	0.0528987	0.0005	0.000888432	DAO, aao; D-amino-acid oxidase [EC:1.4.3.3]
K00275	14.3255	5.2949	1.32373	19.9702	12.4924	3.1231	0.1748	0.195497	pdxH, PNPO; pyridoxamine 5'-phosphate oxidase [EC:1.4.3.5]
K00276	0.0216308	0.0131533	0.00328832	0.292672	0.591981	0.147995	<.0001	6.88093e-06	AOC3, AOC2, tynA; primary-amine oxidase [EC:1.4.3.21]
K00278	92.7263	27.5218	6.88044	111.57	16.8447	4.21117	0.0195	0.0261937	nadB; L-aspartate oxidase [EC:1.4.3.16]
K00281	28.0707	11.7582	2.93955	36.877	16.495	4.12375	0.1632	0.183051	GLDC, gcvP; glycine dehydrogenase [EC:1.4.4.2]
K00282	89.8822	24.3877	6.09694	27.8431	5.14391	1.28598	<.0001	5.38599e-06	gcvPA; glycine dehydrogenase subunit 1 [EC:1.4.4.2]
K00283	44.3582	13.5961	3.39902	26.7575	4.65966	1.16491	<.0001	0.000175964	gcvPB; glycine dehydrogenase subunit 2 [EC:1.4.4.2]
K00285	0.364629	0.17329	0.0433226	0.917558	0.87013	0.217532	0.0104	0.0147395	dadA; D-amino-acid dehydrogenase [EC:1.4.5.1]
K00286	137.73	33.4387	8.35967	209.576	16.6157	4.15394	<.0001	2.27944e-05	proC; pyrroline-5-carboxylate reductase [EC:1.5.1.2]
K00287	186.494	28.6362	7.15904	207.237	20.334	5.08349	0.0546	0.0671479	DHFR, folA; dihydrofolate reductase [EC:1.5.1.3]
K00290	122.244	31.1025	7.77562	47.723	22.6017	5.65042	<.0001	1.66322e-05	LYS1; saccharopine dehydrogenase (NAD+, L-lysine forming) [EC:1.5.1.7]
K00294	50.3235	14.1125	3.52813	9.66945	6.7952	1.6988	<.0001	5.38599e-06	E1.2.1.88; 1-pyrroline-5-carboxylate dehydrogenase [EC:1.2.1.88]
K00297	152.553	37.9651	9.49127	225.24	13.2144	3.30361	<.0001	2.64595e-05	metF, MTHFR; methylenetetrahydrofolate reductase (NADPH) [EC:1.5.1.20]
K00299	0.0281004	0.0288052	0.00720129	0.351958	0.557841	0.13946	0.0005	0.000941193	ssuE; FMN reductase [EC:1.5.1.38]
K00304	0.0110911	0.0148889	0.00372223	0.0752121	0.0617369	0.0154342	0.0011	0.00177269	soxD; sarcosine oxidase, subunit delta [EC:1.5.3.1]
K00305	0.00596438	0.0102606	0.00256515	0.0350276	0.0457525	0.0114381	0.0094	0.0133788	soxG; sarcosine oxidase, subunit gamma [EC:1.5.3.1]
K00316	0.019785	0.0181362	0.00453406	0.114697	0.0946936	0.0236734	<.0001	9.82894e-05	spdH; spermidine dehydrogenase [EC:1.5.99.6]
K00317	0.0156183	0.0157125	0.00392814	0.0577793	0.0634564	0.0158641	0.0044	0.00657875	dmd-tmd; dimethylamine/trimethylamine dehydrogenase [EC:1.5.8.1 1.5.8.2]
K00318	0.802327	0.689791	0.172448	0.491754	0.380709	0.0951772	0.083	0.0978632	PRODH, fadM, putB; proline dehydrogenase [EC:1.5.5.2]
K00319	5.16742	6.6607	1.66517	5.51497	2.13589	0.533973	0.0704	0.0854759	mtd; methylenetetrahydromethanopterin dehydrogenase [EC:1.5.98.1]
K00320	4.64384	6.23832	1.55958	5.2368	1.78751	0.446876	0.0116	0.0163213	mer; 5,10-methylenetetrahydromethanopterin reductase [EC:1.5.98.2]
K00322	0.00115975	0.00337232	0.00084308	0.206655	0.788652	0.197163	0.0171	0.0233092	sthA, udhA; NAD(P) transhydrogenase [EC:1.6.1.1]
K00324	24.2001	11.0041	2.75104	7.89051	4.47408	1.11852	<.0001	4.0984e-05	pntA; H+-translocating NAD(P) transhydrogenase subunit alpha [EC:1.6.1.2 7.1.1.1]
K00325	19.4458	10.2595	2.56486	4.28705	2.61073	0.652682	<.0001	1.21479e-05	pntB; H+-translocating NAD(P) transhydrogenase subunit beta [EC:1.6.1.2 7.1.1.1]
K00326	0	0	0	5.8121	5.26401	1.316	<.0001	5.38599e-06	E1.6.2.2; cytochrome-b5 reductase [EC:1.6.2.2]
K00330	47.1615	14.0253	3.50633	23.2349	15.635	3.90875	0.0006	0.00102927	nuoA; NADH-quinone oxidoreductase subunit A [EC:7.1.1.2]
K00331	56.5356	17.7776	4.44439	19.5307	14.0977	3.52442	<.0001	4.0984e-05	nuoB; NADH-quinone oxidoreductase subunit B [EC:7.1.1.2]
K00332	0.229356	0.187509	0.0468773	0.269203	0.298842	0.0747106	0.8802	0.888078	nuoC; NADH-quinone oxidoreductase subunit C [EC:7.1.1.2]
K00333	2.61999	1.22637	0.306592	11.3363	9.09725	2.27431	<.0001	7.34758e-05	nuoD; NADH-quinone oxidoreductase subunit D [EC:7.1.1.2]
K00334	53.0381	11.741	2.93526	172.743	25.8459	6.46148	<.0001	5.38599e-06	nuoE; NADH-quinone oxidoreductase subunit E [EC:7.1.1.2]
K00335	53.3138	8.6699	2.16747	116.823	17.3562	4.33904	<.0001	5.38599e-06	nuoF; NADH-quinone oxidoreductase subunit F [EC:7.1.1.2]
K00336	0.159778	0.134471	0.0336178	0.325684	0.46449	0.116123	0.451	0.472614	nuoG; NADH-quinone oxidoreductase subunit G [EC:7.1.1.2]
K00337	58.9152	19.1633	4.79081	26.5112	18.8386	4.70964	0.0002	0.000310146	nuoH; NADH-quinone oxidoreductase subunit H [EC:7.1.1.2]
K00338	50.7079	16.4005	4.10012	12.1576	8.58478	2.14619	<.0001	1.04859e-05	nuoI; NADH-quinone oxidoreductase subunit I [EC:7.1.1.2]
K00339	9.3231	5.27806	1.31952	12.1129	11.4365	2.85912	0.6785	0.694077	nuoJ; NADH-quinone oxidoreductase subunit J [EC:7.1.1.2]
K00340	49.3176	15.5235	3.88088	18.7416	12.1457	3.03644	<.0001	5.56604e-05	nuoK; NADH-quinone oxidoreductase subunit K [EC:7.1.1.2]
K00341	64.9498	20.1905	5.04764	23.9573	17.1182	4.27954	<.0001	6.40768e-05	nuoL; NADH-quinone oxidoreductase subunit L [EC:7.1.1.2]
K00342	0.236171	0.200072	0.050018	0.598445	0.642844	0.160711	0.0458	0.0572048	nuoM; NADH-quinone oxidoreductase subunit M [EC:7.1.1.2]
K00343	63.8534	20.3823	5.09557	25.523	17.259	4.31475	<.0001	7.34758e-05	nuoN; NADH-quinone oxidoreductase subunit N [EC:7.1.1.2]
K00355	35.3542	15.6681	3.91701	13.5401	6.33076	1.58269	<.0001	6.40768e-05	NQO1; NAD(P)H dehydrogenase (quinone) [EC:1.6.5.2]
K00362	0.12657	0.062005	0.0155013	0.650562	0.834363	0.208591	<.0001	6.40768e-05	nirB; nitrite reductase (NADH) large subunit [EC:1.7.1.15]
K00363	0.10165	0.0777864	0.0194466	0.482002	0.616051	0.154013	0.0026	0.00395853	nirD; nitrite reductase (NADH) small subunit [EC:1.7.1.15]
K00364	0.219697	0.261817	0.0654542	0.397812	0.690198	0.172549	0.8505	0.859459	E1.7.1.7, guaC; GMP reductase [EC:1.7.1.7]
K00367	0.142806	0.0777577	0.0194394	0.504156	0.371902	0.0929754	<.0001	3.52558e-05	narB; ferredoxin-nitrate reductase [EC:1.7.7.2]
K00368	0.0328702	0.0289375	0.00723437	0.142663	0.146386	0.0365966	0.0009	0.00150255	nirK; nitrite reductase (NO-forming) [EC:1.7.2.1]
K00370	0.829991	1.64886	0.412215	0.270752	1.03492	0.25873	0.0022	0.0034499	narG, narZ, nxrA; nitrate reductase / nitrite oxidoreductase, alpha subunit [EC:1.7.5.1 1.7.99.-]
K00371	1.30422	2.60011	0.650027	0.222591	0.842673	0.210668	0.0012	0.00200243	narH, narY, nxrB; nitrate reductase / nitrite oxidoreductase, beta subunit [EC:1.7.5.1 1.7.99.-]
K00372	0.0172759	0.0127059	0.00317648	0.0928104	0.113821	0.0284551	<.0001	4.0984e-05	nasA; assimilatory nitrate reductase catalytic subunit [EC:1.7.99.-]
K00373	0.0240223	0.0598066	0.0149516	0	0	0	0.0737	0.087769	narJ, narW; nitrate reductase molybdenum cofactor assembly chaperone NarJ/NarW
K00374	0.93987	2.00294	0.500735	0.464057	1.79939	0.449848	<.0001	0.000111778	narI, narV; nitrate reductase gamma subunit [EC:1.7.5.1 1.7.99.-]
K00376	0.317319	0.316739	0.0791846	0.538867	0.367881	0.0919702	0.0116	0.0163213	nosZ; nitrous-oxide reductase [EC:1.7.2.4]
K00380	0.00787312	0.00901601	0.002254	0.200296	0.539841	0.13496	0.0002	0.00033286	cysJ; sulfite reductase (NADPH) flavoprotein alpha-component [EC:1.8.1.2]
K00381	0.17378	0.0740307	0.0185077	0.855718	0.766655	0.191664	<.0001	0.00013093	cysI; sulfite reductase (NADPH) hemoprotein beta-component [EC:1.8.1.2]
K00382	96.2593	26.305	6.57625	101.225	13.2334	3.30834	0.7063	0.720517	DLD, lpd, pdhD; dihydrolipoamide dehydrogenase [EC:1.8.1.4]
K00383	0.0273761	0.0236651	0.00591627	0.269268	0.605137	0.151284	0.0018	0.00278156	GSR, gor; glutathione reductase (NADPH) [EC:1.8.1.7]
K00384	201	29.9326	7.48314	298.037	20.3433	5.08582	<.0001	5.38599e-06	trxB, TRR; thioredoxin reductase (NADPH) [EC:1.8.1.9]
K00385	15.2499	6.13305	1.53326	8.13758	3.43411	0.858528	0.0001	0.000201456	asrC; anaerobic sulfite reductase subunit C
K00390	17.6342	8.17716	2.04429	15.043	7.05433	1.76358	0.2744	0.300173	cysH; phosphoadenosine phosphosulfate reductase [EC:1.8.4.8 1.8.4.10]
K00394	6.43094	5.37422	1.34356	0.700399	0.388289	0.0970723	<.0001	5.38599e-06	aprA; adenylylsulfate reductase, subunit A [EC:1.8.99.2]
K00395	4.18761	3.36818	0.842044	0.478146	0.235614	0.0589036	<.0001	5.38599e-06	aprB; adenylylsulfate reductase, subunit B [EC:1.8.99.2]
K00399	4.12361	4.76136	1.19034	4.43884	1.92769	0.481922	0.1134	0.131454	mcrA; methyl-coenzyme M reductase alpha subunit [EC:2.8.4.1]
K00400	10.6197	16.3651	4.09128	10.2299	4.12924	1.03231	0.0973	0.113712	K00400; methyl coenzyme M reductase system, component A2
K00401	5.43729	7.21343	1.80336	5.80045	2.11226	0.528064	0.0595	0.0728621	mcrB; methyl-coenzyme M reductase beta subunit [EC:2.8.4.1]
K00402	5.57721	7.3999	1.84998	5.9901	2.37867	0.594667	0.0595	0.0728621	mcrG; methyl-coenzyme M reductase gamma subunit [EC:2.8.4.1]
K00404	0.0240184	0.0215142	0.00537856	0.133611	0.133488	0.0333719	<.0001	3.52558e-05	ccoN; cytochrome c oxidase cbb3-type subunit I [EC:7.1.1.9]
K00405	0.0466295	0.0318197	0.00795493	0.193608	0.15611	0.0390276	0.0023	0.00352998	ccoO; cytochrome c oxidase cbb3-type subunit II
K00406	0.0591381	0.0345195	0.00862987	0.447287	0.462905	0.115726	<.0001	5.38599e-06	ccoP; cytochrome c oxidase cbb3-type subunit III
K00407	7.41895	6.11726	1.52932	1.16302	0.816801	0.2042	<.0001	7.34758e-05	ccoQ; cytochrome c oxidase cbb3-type subunit IV
K00410	0.0332354	0.0232643	0.00581607	0.140624	0.148519	0.0371297	<.0001	9.82894e-05	fbcH; ubiquinol-cytochrome c reductase cytochrome b/c1 subunit
K00411	0.0909535	0.0680293	0.0170073	0.556697	0.393754	0.0984384	<.0001	4.78987e-05	UQCRFS1, RIP1, petA; ubiquinol-cytochrome c reductase iron-sulfur subunit [EC:7.1.1.8]
K00412	0.374735	0.159692	0.0399229	1.16637	0.63588	0.15897	<.0001	3.0485e-05	CYTB, petB; ubiquinol-cytochrome c reductase cytochrome b subunit
K00413	0.100985	0.0603989	0.0150997	0.416471	0.317393	0.0793483	0.0015	0.00246344	CYC1, CYT1, petC; ubiquinol-cytochrome c reductase cytochrome c1 subunit
K00425	80.6783	22.879	5.71975	42.3853	18.1612	4.5403	0.0001	0.000201456	cydA; cytochrome bd ubiquinol oxidase subunit I [EC:7.1.1.7]
K00426	77.5248	21.497	5.37424	40.9431	16.8384	4.20959	<.0001	0.000175964	cydB; cytochrome bd ubiquinol oxidase subunit II [EC:7.1.1.7]
K00432	452.895	57.9263	14.4816	90.1786	11.6337	2.90842	<.0001	5.38599e-06	gpx, btuE, bsaA; glutathione peroxidase [EC:1.11.1.9]
K00435	0	0	0	0.0242146	0.0939238	0.0234809	0.1508	0.170457	hemQ; hydrogen peroxide-dependent heme synthase [EC:1.3.98.5]
K00440	5.58937	7.34925	1.83731	6.12253	2.31392	0.578479	0.0317	0.0410843	frhA; coenzyme F420 hydrogenase subunit alpha [EC:1.12.98.1]
K00441	20.7633	15.5712	3.89279	13.7203	4.72909	1.18227	0.05	0.0620713	frhB; coenzyme F420 hydrogenase subunit beta [EC:1.12.98.1]
K00442	5.95501	9.35784	2.33946	6.03346	2.13413	0.533532	0.0317	0.0410843	frhD; coenzyme F420 hydrogenase subunit delta
K00443	5.38697	7.411	1.85275	5.98096	2.13335	0.533338	0.0288	0.0376366	frhG; coenzyme F420 hydrogenase subunit gamma [EC:1.12.98.1]
K00446	0.144989	0.090139	0.0225347	0.968981	0.712959	0.17824	<.0001	9.18181e-06	dmpB, xylE; catechol 2,3-dioxygenase [EC:1.13.11.2]
K00448	0.0610921	0.0470214	0.0117553	0.308821	0.296335	0.0740839	<.0001	0.000151881	pcaG; protocatechuate 3,4-dioxygenase, alpha subunit [EC:1.13.11.3]
K00449	0.0626857	0.0493611	0.0123403	0.336842	0.283975	0.0709936	<.0001	0.00013093	pcaH; protocatechuate 3,4-dioxygenase, beta subunit [EC:1.13.11.3]
K00450	0.0690217	0.0471872	0.0117968	0.426589	0.371008	0.092752	<.0001	9.18181e-06	E1.13.11.4; gentisate 1,2-dioxygenase [EC:1.13.11.4]
K00451	0.286325	0.163887	0.0409718	1.11702	0.886325	0.221581	<.0001	3.52558e-05	HGD, hmgA; homogentisate 1,2-dioxygenase [EC:1.13.11.5]
K00452	0.01091	0.0240908	0.0060227	0.0920086	0.0963737	0.0240934	0.0005	0.000924348	HAAO; 3-hydroxyanthranilate 3,4-dioxygenase [EC:1.13.11.6]
K00453	0.212496	0.105624	0.0264061	0.902478	0.756289	0.189072	<.0001	2.27944e-05	TDO2, kynA; tryptophan 2,3-dioxygenase [EC:1.13.11.11]
K00455	0.00374437	0.0108043	0.00270109	0.140442	0.550565	0.137641	0.8956	0.903246	hpaD, hpcB; 3,4-dihydroxyphenylacetate 2,3-dioxygenase [EC:1.13.11.15]
K00457	0.165342	0.0984779	0.0246195	0.616299	0.584182	0.146045	0.0006	0.00102927	HPD, hppD; 4-hydroxyphenylpyruvate dioxygenase [EC:1.13.11.27]
K00459	28.998	6.6461	1.66153	34.2177	7.6805	1.92013	0.05	0.0620713	ncd2, npd; nitronate monooxygenase [EC:1.13.12.16]
K00467	0.005982	0.00800679	0.0020017	0.0380766	0.0423131	0.0105783	0.0063	0.00933472	E1.13.12.4; lactate 2-monooxygenase [EC:1.13.12.4]
K00469	0.137521	0.0758219	0.0189555	0.477081	0.360224	0.0900561	<.0001	5.56604e-05	MIOX; inositol oxygenase [EC:1.13.99.1]
K00472	0.0137331	0.0173939	0.00434847	0.0649924	0.077327	0.0193317	0.0189	0.0256473	P4HA; prolyl 4-hydroxylase [EC:1.14.11.2]
K00477	0.0201386	0.0219972	0.0054993	0.090965	0.0954406	0.0238602	0.0003	0.00051297	PHYH; phytanoyl-CoA hydroxylase [EC:1.14.11.18]
K00481	0.0599516	0.0452808	0.0113202	0.279655	0.309407	0.0773518	<.0001	0.000112898	pobA; p-hydroxybenzoate 3-monooxygenase [EC:1.14.13.2]
K00483	0.0708831	0.0535092	0.0133773	0.421822	0.663653	0.165913	<.0001	0.000151881	hpaB; 4-hydroxyphenylacetate 3-monooxygenase [EC:1.14.14.9]
K00484	0.001024	0.004096	0.001024	0.110567	0.442269	0.110567	0.9642	0.967537	hpaC; flavin reductase (NADH) [EC:1.5.1.36]
K00485	0.0222221	0.0193815	0.00484537	0.135831	0.160687	0.0401716	<.0001	8.51833e-05	FMO; dimethylaniline monooxygenase (N-oxide forming) [EC:1.14.13.8]
K00486	0.00537675	0.00882844	0.00220711	0.0541691	0.0610339	0.0152585	0.0022	0.00343239	KMO; kynurenine 3-monooxygenase [EC:1.14.13.9]
K00496	0.0332205	0.0371734	0.00929336	0.240801	0.207553	0.0518884	<.0001	2.60972e-05	alkB1_2, alkM; alkane 1-monooxygenase [EC:1.14.15.3]
K00499	0.0170075	0.0198887	0.00497218	0.0742781	0.0856522	0.021413	0.0136	0.0190002	CMO; choline monooxygenase [EC:1.14.15.7]
K00500	0.0434496	0.0348746	0.00871864	0.173124	0.171267	0.0428168	0.0023	0.00352998	phhA, PAH; phenylalanine-4-hydroxylase [EC:1.14.16.1]
K00507	0.0885807	0.044072	0.011018	0.423686	0.437479	0.10937	<.0001	8.51833e-05	SCD, desC; stearoyl-CoA desaturase (Delta-9 desaturase) [EC:1.14.19.1]
K00508	0.155107	0.0721314	0.0180329	0.5085	0.446802	0.1117	0.0001	0.00026839	E1.14.19.3; linoleoyl-CoA desaturase [EC:1.14.19.3]
K00523	0.0327534	0.0456293	0.0114073	0.0664229	0.0717392	0.0179348	0.1455	0.166765	ascD, ddhD, rfbI; CDP-4-dehydro-6-deoxyglucose reductase, E3 [EC:1.17.1.1]
K00525	61.3667	17.456	4.364	68.6678	24.7586	6.18965	0.4739	0.495769	E1.17.4.1A, nrdA, nrdE; ribonucleoside-diphosphate reductase alpha chain [EC:1.17.4.1]
K00526	0.149287	0.134748	0.0336869	11.7	11.6423	2.91059	<.0001	5.38599e-06	E1.17.4.1B, nrdB, nrdF; ribonucleoside-diphosphate reductase beta chain [EC:1.17.4.1]
K00527	0.18924	0.221368	0.0553421	1.51425	1.23228	0.308071	<.0001	2.64595e-05	rtpR; ribonucleoside-triphosphate reductase (thioredoxin) [EC:1.17.4.2]
K00528	57.5883	12.8535	3.21338	139.643	17.2751	4.31878	<.0001	5.38599e-06	fpr; ferredoxin/flavodoxin---NADP+ reductase [EC:1.18.1.2 1.19.1.1]
K00529	0.119243	0.0693591	0.0173398	0.837353	0.87746	0.219365	<.0001	1.21479e-05	hcaD; 3-phenylpropionate/trans-cinnamate dioxygenase ferredoxin reductase component [EC:1.18.1.3]
K00545	0.00504125	0.00999532	0.00249883	0.027406	0.0319265	0.00798162	0.0198	0.0266142	COMT; catechol O-methyltransferase [EC:2.1.1.6]
K00547	3.54074	1.76818	0.442045	0.700151	0.322596	0.0806491	<.0001	1.21479e-05	mmuM, BHMT2; homocysteine S-methyltransferase [EC:2.1.1.10]
K00548	176.689	47.4577	11.8644	211.486	19.8626	4.96566	0.0237	0.03148	metH, MTR; 5-methyltetrahydrofolate--homocysteine methyltransferase [EC:2.1.1.13]
K00549	54.771	18.3926	4.59814	11.5586	3.45715	0.864288	<.0001	5.38599e-06	metE; 5-methyltetrahydropteroyltriglutamate--homocysteine methyltransferase [EC:2.1.1.14]
K00551	5.35916	4.69205	1.17301	0	0	0	<.0001	5.38599e-06	PEMT; phosphatidylethanolamine/phosphatidyl-N-methylethanolamine N-methyltransferase [EC:2.1.1.17 2.1.1.71]
K00558	630.092	121.092	30.2729	662.899	84.0386	21.0096	0.2913	0.316677	DNMT1, dcm; DNA (cytosine-5)-methyltransferase 1 [EC:2.1.1.37]
K00560	245.017	37.9839	9.49598	253.361	21.496	5.37401	0.4975	0.519495	thyA, TYMS; thymidylate synthase [EC:2.1.1.45]
K00565	3.07873	2.57946	0.644864	0.0557603	0.0696618	0.0174155	<.0001	5.38599e-06	RNMT; mRNA (guanine-N7-)-methyltransferase [EC:2.1.1.56]
K00566	138.52	27.2889	6.82223	224.657	28.3433	7.08582	<.0001	1.04859e-05	mnmA, trmU; tRNA-uridine 2-sulfurtransferase [EC:2.8.1.13]
K00568	0.237735	0.163667	0.0409167	0.397937	0.488965	0.122241	0.6785	0.694077	ubiG; 2-polyprenyl-6-hydroxyphenyl methylase / 3-demethylubiquinone-9 3-methyltransferase [EC:2.1.1.222 2.1.1.64]
K00569	0.0143468	0.0262555	0.00656386	0.0248556	0.0443345	0.0110836	0.6246	0.642883	TPMT, tpmT; thiopurine S-methyltransferase [EC:2.1.1.67]
K00570	0.729701	0.512097	0.128024	0.978051	0.940016	0.235004	0.5718	0.591757	pmtA; phosphatidylethanolamine/phosphatidyl-N-methylethanolamine N-methyltransferase [EC:2.1.1.17 2.1.1.71]
K00575	55.8859	17.9716	4.4929	38.8056	13.1105	3.27762	0.0159	0.021941	cheR; chemotaxis protein methyltransferase CheR [EC:2.1.1.80]
K00577	11.0191	17.9636	4.49091	11.5591	4.29443	1.07361	0.0159	0.021941	mtrA; tetrahydromethanopterin S-methyltransferase subunit A [EC:2.1.1.86]
K00578	3.63953	4.62917	1.15729	4.1751	1.79162	0.447905	0.0382	0.0482745	mtrB; tetrahydromethanopterin S-methyltransferase subunit B [EC:2.1.1.86]
K00579	5.44376	7.50973	1.87743	5.56619	2.04065	0.510162	0.0458	0.0572048	mtrC; tetrahydromethanopterin S-methyltransferase subunit C [EC:2.1.1.86]
K00580	4.37383	5.99485	1.49871	4.72507	1.94792	0.486979	0.0546	0.0671479	mtrD; tetrahydromethanopterin S-methyltransferase subunit D [EC:2.1.1.86]
K00581	4.55158	6.67401	1.6685	4.88864	2.01893	0.504733	0.0262	0.0344475	mtrE; tetrahydromethanopterin S-methyltransferase subunit E [EC:2.1.1.86]
K00582	2.14085	3.07074	0.767686	2.41137	0.977475	0.244369	0.0159	0.021941	mtrF; tetrahydromethanopterin S-methyltransferase subunit F [EC:2.1.1.86]
K00583	3.13	4.17814	1.04454	3.31664	1.2975	0.324374	0.0546	0.0671479	mtrG; tetrahydromethanopterin S-methyltransferase subunit G [EC:2.1.1.86]
K00584	6.4287	9.23268	2.30817	7.03064	2.95112	0.737779	0.0237	0.03148	mtrH; tetrahydromethanopterin S-methyltransferase subunit H [EC:2.1.1.86]
K00587	7.01445	5.92769	1.48192	0.0343868	0.0841136	0.0210284	<.0001	5.38599e-06	ICMT, STE14; protein-S-isoprenylcysteine O-methyltransferase [EC:2.1.1.100]
K00588	120.236	29.3422	7.33556	129.806	19.2484	4.81211	0.386	0.407501	E2.1.1.104; caffeoyl-CoA O-methyltransferase [EC:2.1.1.104]
K00595	68.3553	20.0215	5.00537	18.7469	4.1762	1.04405	<.0001	5.38599e-06	cobL; precorrin-6Y C5,15-methyltransferase (decarboxylating) [EC:2.1.1.132]
K00600	253.93	41.1825	10.2956	352.546	13.4627	3.36568	<.0001	5.38599e-06	glyA, SHMT; glycine hydroxymethyltransferase [EC:2.1.2.1]
K00602	266.228	63.2575	15.8144	329.9	15.4533	3.86332	0.0009	0.00150255	purH; phosphoribosylaminoimidazolecarboxamide formyltransferase / IMP cyclohydrolase [EC:2.1.2.3 3.5.4.10]
K00603	4.85516	1.80649	0.451623	16.3955	6.4599	1.61497	<.0001	6.88093e-06	fctD; glutamate formiminotransferase / 5-formyltetrahydrofolate cyclo-ligase [EC:2.1.2.5 6.3.3.2]
K00604	207.567	37.1559	9.28899	281.13	23.0182	5.75456	<.0001	1.95324e-05	MTFMT, fmt; methionyl-tRNA formyltransferase [EC:2.1.2.9]
K00605	119.021	28.4422	7.11056	69.6129	17.5212	4.3803	<.0001	8.51833e-05	gcvT, AMT; aminomethyltransferase [EC:2.1.2.10]
K00606	90.7538	25.5125	6.37812	62.8505	25.5494	6.38736	0.0059	0.00878567	panB; 3-methyl-2-oxobutanoate hydroxymethyltransferase [EC:2.1.2.11]
K00608	0.103917	0.102848	0.0257119	0.000329437	0.00131775	0.000329437	<.0001	1.5861e-05	pyrBI; aspartate carbamoyltransferase [EC:2.1.3.2]
K00609	194.199	36.9578	9.23944	283.256	15.7791	3.94477	<.0001	5.38599e-06	pyrB, PYR2; aspartate carbamoyltransferase catalytic subunit [EC:2.1.3.2]
K00610	135.026	25.186	6.2965	178.603	20.0477	5.01192	<.0001	0.000112898	pyrI; aspartate carbamoyltransferase regulatory subunit
K00611	149.312	20.9028	5.22569	206.466	27.7032	6.92579	<.0001	5.56604e-05	OTC, argF, argI; ornithine carbamoyltransferase [EC:2.1.3.3]
K00613	0.0706668	0.113279	0.0283197	1.31754	2.23464	0.558661	0.0004	0.000624632	GATM; glycine amidinotransferase [EC:2.1.4.1]
K00615	440.234	93.9487	23.4872	639.883	73.6474	18.4119	<.0001	3.52558e-05	E2.2.1.1, tktA, tktB; transketolase [EC:2.2.1.1]
K00616	18.274	4.3558	1.08895	58.2923	18.1048	4.5262	<.0001	5.38599e-06	E2.2.1.2, talA, talB; transaldolase [EC:2.2.1.2]
K00619	2.85749	1.47845	0.369613	4.70739	4.67845	1.16961	0.0973	0.113712	argA; amino-acid N-acetyltransferase [EC:2.3.1.1]
K00620	82.5188	14.8593	3.71482	178.845	19.9412	4.9853	<.0001	5.38599e-06	argJ; glutamate N-acetyltransferase / amino-acid N-acetyltransferase [EC:2.3.1.35 2.3.1.1]
K00621	5.68515	5.85412	1.46353	0	0	0	<.0001	5.38599e-06	GNPNAT1, GNA1; glucosamine-phosphate N-acetyltransferase [EC:2.3.1.4]
K00625	104.772	27.8349	6.95873	124.486	18.5594	4.63985	0.0595	0.0728621	E2.3.1.8, pta; phosphate acetyltransferase [EC:2.3.1.8]
K00626	30.7463	7.89637	1.97409	61.5277	18.3397	4.58491	<.0001	1.21479e-05	E2.3.1.9, atoB; acetyl-CoA C-acetyltransferase [EC:2.3.1.9]
K00627	0.0898628	0.0461184	0.0115296	1.47182	1.17982	0.294956	<.0001	5.38599e-06	DLAT, aceF, pdhC; pyruvate dehydrogenase E2 component (dihydrolipoamide acetyltransferase) [EC:2.3.1.12]
K00631	1.73948	4.17839	1.0446	1.21954	4.39402	1.0985	0.0176	0.0238336	plsB; glycerol-3-phosphate O-acyltransferase [EC:2.3.1.15]
K00632	0.15806	0.0974995	0.0243749	1.38259	1.08788	0.271971	<.0001	1.21479e-05	fadA, fadI; acetyl-CoA acyltransferase [EC:2.3.1.16]
K00634	27.1453	8.98763	2.24691	10.6098	4.36174	1.09044	<.0001	3.52558e-05	ptb; phosphate butyryltransferase [EC:2.3.1.19]
K00635	0.141527	0.0975999	0.0244	0.903755	0.810283	0.202571	<.0001	9.18181e-06	tgs, wax-dgat; diacylglycerol O-acyltransferase / wax synthase [EC:2.3.1.20 2.3.1.75]
K00639	73.6942	19.4666	4.86665	73.1367	21.2005	5.30013	0.91	0.916097	kbl, GCAT; glycine C-acetyltransferase [EC:2.3.1.29]
K00640	297.004	63.9291	15.9823	276.761	19.0567	4.76417	0.3657	0.387168	cysE; serine O-acetyltransferase [EC:2.3.1.30]
K00641	44.8595	27.1929	6.79823	65.2242	13.3786	3.34464	0.0002	0.000355129	metX; homoserine O-acetyltransferase/O-succinyltransferase [EC:2.3.1.31 2.3.1.46]
K00643	0.0515729	0.0312768	0.00781921	0.30545	0.347929	0.0869822	<.0001	5.56604e-05	E2.3.1.37, ALAS; 5-aminolevulinate synthase [EC:2.3.1.37]
K00645	174.168	42.6189	10.6547	105.269	24.0034	6.00084	<.0001	7.34758e-05	fabD, MCAT, MCT1; [acyl-carrier-protein] S-malonyltransferase [EC:2.3.1.39]
K00647	54.4673	18.5601	4.64003	6.28837	5.6202	1.40505	<.0001	5.38599e-06	fabB; 3-oxoacyl-[acyl-carrier-protein] synthase I [EC:2.3.1.41]
K00648	225.188	64.4242	16.106	108.898	30.0404	7.5101	<.0001	1.42253e-05	fabH; 3-oxoacyl-[acyl-carrier-protein] synthase III [EC:2.3.1.180]
K00651	139.548	31.3827	7.84569	217.535	18.94	4.735	<.0001	5.99662e-06	metA; homoserine O-succinyltransferase/O-acetyltransferase [EC:2.3.1.46 2.3.1.31]
K00652	91.2544	21.6458	5.41145	27.4527	11.0877	2.77191	<.0001	6.88093e-06	bioF; 8-amino-7-oxononanoate synthase [EC:2.3.1.47]
K00654	9.70256	7.39641	1.8491	0.00296181	0.0061291	0.00153227	<.0001	5.38599e-06	SPT; serine palmitoyltransferase [EC:2.3.1.50]
K00655	215.425	40.1929	10.0482	404.909	29.4471	7.36178	<.0001	5.38599e-06	plsC; 1-acyl-sn-glycerol-3-phosphate acyltransferase [EC:2.3.1.51]
K00656	70.9927	23.2149	5.80373	283.143	26.6753	6.66883	<.0001	5.38599e-06	E2.3.1.54, pflD; formate C-acetyltransferase [EC:2.3.1.54]
K00657	43.6976	14.1324	3.5331	66.4661	13.8097	3.45244	0.0003	0.000608085	speG, SAT; diamine N-acetyltransferase [EC:2.3.1.57]
K00658	0.3408	0.210566	0.0526414	0.647079	0.658155	0.164539	0.1748	0.195497	DLST, sucB; 2-oxoglutarate dehydrogenase E2 component (dihydrolipoamide succinyltransferase) [EC:2.3.1.61]
K00665	0.576999	2.29993	0.574983	0.00293331	0.00894999	0.0022375	0.2243	0.248206	FASN; fatty acid synthase, animal type [EC:2.3.1.85]
K00669	0.178244	0.283786	0.0709466	0.12076	0.11163	0.0279075	0.9699	0.971137	AANAT; arylalkylamine N-acetyltransferase [EC:2.3.1.87]
K00672	9.97351	14.0734	3.51836	10.5356	3.66373	0.915934	0.0317	0.0410843	ftr; formylmethanofuran--tetrahydromethanopterin N-formyltransferase [EC:2.3.1.101]
K00673	0	0	0	0.139537	0.533853	0.133463	0.0079	0.0113948	astA; arginine N-succinyltransferase [EC:2.3.1.109]
K00674	26.2628	8.92082	2.2302	30.2159	7.66516	1.91629	0.1521	0.171147	dapD; 2,3,4,5-tetrahydropyridine-2,6-dicarboxylate N-succinyltransferase [EC:2.3.1.117]
K00677	165.949	44.5006	11.1251	68.085	29.1405	7.28512	<.0001	2.64595e-05	lpxA; UDP-N-acetylglucosamine acyltransferase [EC:2.3.1.129]
K00681	7.78591	2.28006	0.570015	10.1973	1.9234	0.480849	0.0059	0.00878567	ggt; gamma-glutamyltranspeptidase / glutathione hydrolase [EC:2.3.2.2 3.4.19.13]
K00682	33.7527	21.2028	5.30071	41.5833	15.1196	3.7799	0.0458	0.0572048	GGCT; gamma-glutamylcyclotransferase [EC:4.3.2.9]
K00688	387.587	29.4556	7.3639	565.461	40.1138	10.0285	<.0001	5.38599e-06	PYG, glgP; glycogen phosphorylase [EC:2.4.1.1]
K00690	7.16418	2.88276	0.720689	1.84569	0.937602	0.2344	<.0001	1.04859e-05	E2.4.1.7; sucrose phosphorylase [EC:2.4.1.7]
K00691	1.53906	1.34625	0.336563	4.43593	2.37067	0.592667	0.0002	0.000355129	mapA; maltose phosphorylase [EC:2.4.1.8]
K00693	0.206155	0.598391	0.149598	0.149067	0.220636	0.055159	0.8498	0.859459	GYS; glycogen synthase [EC:2.4.1.11]
K00694	11.0284	8.59145	2.14786	6.22358	6.86589	1.71647	0.0129	0.0180314	bcsA; cellulose synthase (UDP-forming) [EC:2.4.1.12]
K00697	0.0261723	0.0184974	0.00462435	0.277078	0.512822	0.128205	<.0001	7.9474e-06	otsA; trehalose 6-phosphate synthase [EC:2.4.1.15 2.4.1.347]
K00698	0.112644	0.0948588	0.0237147	0.0189698	0.0492611	0.0123153	0.0003	0.00051595	CHS1; chitin synthase [EC:2.4.1.16]
K00699	1.49871	1.35851	0.339627	0	0	0	<.0001	5.38599e-06	UGT; glucuronosyltransferase [EC:2.4.1.17]
K00700	286.549	33.3712	8.3428	383.577	23.8017	5.95042	<.0001	5.99662e-06	GBE1, glgB; 1,4-alpha-glucan branching enzyme [EC:2.4.1.18]
K00701	0.553464	0.678848	0.169712	0.693902	0.675399	0.16885	0.3271	0.348789	cgt; cyclomaltodextrin glucanotransferase [EC:2.4.1.19]
K00702	129.175	19.0074	4.75185	45.0762	13.447	3.36175	<.0001	5.38599e-06	E2.4.1.20; cellobiose phosphorylase [EC:2.4.1.20]
K00703	196.594	37.7647	9.44118	304.124	28.2348	7.0587	<.0001	5.38599e-06	glgA; starch synthase [EC:2.4.1.21]
K00705	348.409	48.6981	12.1745	497.19	19.996	4.99901	<.0001	5.38599e-06	malQ; 4-alpha-glucanotransferase [EC:2.4.1.25]
K00710	0.0078095	0.0139213	0.00348033	0.166672	0.347827	0.0869567	0.6301	0.64843	GALNT; polypeptide N-acetylgalactosaminyltransferase [EC:2.4.1.41]
K00713	0	0	0	0.327259	1.24773	0.311932	0.0359	0.0455167	waaD; UDP-glucose:(glucosyl)LPS alpha-1,2-glucosyltransferase [EC:2.4.1.-]
K00718	33.6292	15.5809	3.89522	25.2357	10.1035	2.52587	0.0973	0.113712	FUT1_2; galactoside 2-L-fucosyltransferase 1/2 [EC:2.4.1.69]
K00720	0.178242	0.242421	0.0606053	0.227443	0.191603	0.0479008	0.2503	0.275748	UGCG; ceramide glucosyltransferase [EC:2.4.1.80]
K00721	168.081	32.2467	8.06169	75.9694	19.0049	4.75123	<.0001	7.9474e-06	DPM1; dolichol-phosphate mannosyltransferase [EC:2.4.1.83]
K00728	19.0591	5.29334	1.32334	44.3879	13.0914	3.27285	<.0001	1.04859e-05	POMT, pmt; dolichyl-phosphate-mannose-protein mannosyltransferase [EC:2.4.1.109]
K00729	9.59412	5.74081	1.4352	3.1629	1.92367	0.480916	<.0001	0.000151881	ALG5; dolichyl-phosphate beta-glucosyltransferase [EC:2.4.1.117]
K00737	10.1383	3.87242	0.968106	6.08697	3.5312	0.882801	0.0067	0.00977542	MGAT3; beta-1,4-mannosyl-glycoprotein beta-1,4-N-acetylglucosaminyltransferase [EC:2.4.1.144]
K00748	140.615	33.1644	8.29109	83.3489	30.6268	7.6567	0.0001	0.000201456	lpxB; lipid-A-disaccharide synthase [EC:2.4.1.182]
K00756	55.3548	7.7595	1.93988	72.5895	20.4058	5.10146	0.0215	0.028733	pdp; pyrimidine-nucleoside phosphorylase [EC:2.4.2.2]
K00757	87.1023	22.6553	5.66383	99.6891	17.8329	4.45823	0.1521	0.171147	udp, UPP; uridine phosphorylase [EC:2.4.2.3]
K00758	0.0684661	0.183756	0.045939	0.364898	0.595568	0.148892	0.0008	0.00127948	deoA, TYMP; thymidine phosphorylase [EC:2.4.2.4]
K00759	152.361	36.083	9.02075	81.074	18.1644	4.5411	<.0001	4.78987e-05	APRT, apt; adenine phosphoribosyltransferase [EC:2.4.2.7]
K00760	207.004	36.9107	9.22767	311.551	10.03	2.5075	<.0001	5.38599e-06	hprT, hpt, HPRT1; hypoxanthine phosphoribosyltransferase [EC:2.4.2.8]
K00761	101.833	14.964	3.74101	195.867	23.6379	5.90948	<.0001	5.38599e-06	upp, UPRT; uracil phosphoribosyltransferase [EC:2.4.2.9]
K00762	187.259	32.2461	8.06153	281.004	16.0646	4.01614	<.0001	5.99662e-06	pyrE; orotate phosphoribosyltransferase [EC:2.4.2.10]
K00763	163.413	30.0971	7.52429	320.191	21.3409	5.33524	<.0001	5.38599e-06	pncB, NAPRT1; nicotinate phosphoribosyltransferase [EC:6.3.4.21]
K00764	338.456	74.282	18.5705	591.081	26.8521	6.71303	<.0001	5.38599e-06	purF, PPAT; amidophosphoribosyltransferase [EC:2.4.2.14]
K00765	142.355	26.722	6.68051	196.953	17.3809	4.34523	<.0001	1.66322e-05	hisG; ATP phosphoribosyltransferase [EC:2.4.2.17]
K00766	126.192	28.5995	7.14988	22.0317	5.29066	1.32267	<.0001	5.38599e-06	trpD; anthranilate phosphoribosyltransferase [EC:2.4.2.18]
K00767	92.9078	20.4902	5.12254	118.11	16.2164	4.0541	0.0007	0.00116369	nadC, QPRT; nicotinate-nucleotide pyrophosphorylase (carboxylating) [EC:2.4.2.19]
K00768	91.9248	26.0622	6.51555	59.7366	11.7301	2.93254	0.0005	0.000904344	E2.4.2.21, cobU, cobT; nicotinate-nucleotide--dimethylbenzimidazole phosphoribosyltransferase [EC:2.4.2.21]
K00769	0.0452339	0.0417931	0.0104483	0.825633	0.764888	0.191222	<.0001	1.21479e-05	gpt; xanthine phosphoribosyltransferase [EC:2.4.2.22]
K00772	3.93716	1.75323	0.438308	5.5411	2.34905	0.587263	0.0546	0.0671479	mtaP, MTAP; 5'-methylthioadenosine phosphorylase [EC:2.4.2.28]
K00784	197.19	31.287	7.82176	188.087	31.5246	7.88115	0.3461	0.367538	rnz; ribonuclease Z [EC:3.1.26.11]
K00787	1.56291	1.7049	0.426226	0.298351	0.470919	0.11773	0.0259	0.0342543	FDPS; farnesyl diphosphate synthase [EC:2.5.1.1 2.5.1.10]
K00788	50.6253	15.5997	3.89993	138.226	24.7344	6.18361	<.0001	5.38599e-06	thiE; thiamine-phosphate pyrophosphorylase [EC:2.5.1.3]
K00789	369.687	38.4874	9.62186	460.371	29.9668	7.4917	<.0001	6.88093e-06	metK; S-adenosylmethionine synthetase [EC:2.5.1.6]
K00790	286.79	55.6995	13.9249	522.957	57.5708	14.3927	<.0001	5.38599e-06	murA; UDP-N-acetylglucosamine 1-carboxyvinyltransferase [EC:2.5.1.7]
K00791	339.012	59.9039	14.976	382.645	20.6501	5.16252	0.0546	0.0671479	miaA, TRIT1; tRNA dimethylallyltransferase [EC:2.5.1.75]
K00793	92.7061	23.8491	5.96226	50.7977	22.1936	5.5484	<.0001	0.000175964	ribE, RIB5; riboflavin synthase [EC:2.5.1.9]
K00794	89.0161	20.5002	5.12505	47.5351	18.4815	4.62036	<.0001	4.78987e-05	ribH, RIB4; 6,7-dimethyl-8-ribityllumazine synthase [EC:2.5.1.78]
K00795	1.03807	3.11938	0.779846	0.969027	0.691717	0.172929	0.0003	0.000465495	ispA; farnesyl diphosphate synthase [EC:2.5.1.1 2.5.1.10]
K00796	149.899	34.474	8.6185	109.893	24.2154	6.05386	0.0026	0.00395853	folP; dihydropteroate synthase [EC:2.5.1.15]
K00797	47.3585	13.0902	3.27254	18.4689	9.56288	2.39072	<.0001	3.0485e-05	speE, SRM, SPE3; spermidine synthase [EC:2.5.1.16]
K00798	109.985	22.2724	5.5681	59.1556	20.1458	5.03646	<.0001	3.52558e-05	MMAB, pduO; cob(I)alamin adenosyltransferase [EC:2.5.1.17]
K00799	32.3261	25.3332	6.3333	5.67149	4.14743	1.03686	0.002	0.0031379	GST, gst; glutathione S-transferase [EC:2.5.1.18]
K00800	226.28	40.2484	10.0621	294.781	11.8854	2.97134	<.0001	5.56604e-05	aroA; 3-phosphoshikimate 1-carboxyvinyltransferase [EC:2.5.1.19]
K00801	3.44056	5.72218	1.43054	11.2521	12.79	3.19751	0.0093	0.0132941	FDFT1; farnesyl-diphosphate farnesyltransferase [EC:2.5.1.21]
K00803	1.28438	0.596806	0.149202	28.9047	12.3118	3.07794	<.0001	5.38599e-06	AGPS, agpS; alkyldihydroxyacetonephosphate synthase [EC:2.5.1.26]
K00805	0	0	0	0.026459	0.105836	0.026459	0.3173	0.339304	hepST; heptaprenyl diphosphate synthase [EC:2.5.1.30]
K00806	187.681	41.475	10.3687	249.532	19.7674	4.94185	<.0001	9.82894e-05	uppS; undecaprenyl diphosphate synthase [EC:2.5.1.31]
K00808	0.0447986	0.0292224	0.00730561	0.18868	0.223355	0.0558388	0.0039	0.0059145	hss; homospermidine synthase [EC:2.5.1.44]
K00812	107.362	25.8575	6.46438	68.0984	17.9435	4.48587	0.0002	0.000408403	aspB; aspartate aminotransferase [EC:2.6.1.1]
K00813	1.11766	2.90756	0.726891	0.555019	2.1818	0.54545	0.0001	0.00021642	aspC; aspartate aminotransferase [EC:2.6.1.1]
K00814	5.37181	4.27369	1.06842	0.00134275	0.00403135	0.00100784	<.0001	5.38599e-06	GPT, ALT; alanine transaminase [EC:2.6.1.2]
K00817	151.948	31.4837	7.87092	189.874	17.1457	4.28642	0.0004	0.000691974	hisC; histidinol-phosphate aminotransferase [EC:2.6.1.9]
K00819	47.3863	15.8532	3.96331	9.33475	6.62937	1.65734	<.0001	7.9474e-06	rocD, OAT; ornithine--oxo-acid transaminase [EC:2.6.1.13]
K00820	281.593	46.8772	11.7193	415.382	26.4507	6.61268	<.0001	5.99662e-06	glmS, GFPT; glutamine---fructose-6-phosphate transaminase (isomerizing) [EC:2.6.1.16]
K00821	67.6821	16.5408	4.13521	113.635	21.9604	5.4901	<.0001	2.64595e-05	argD; acetylornithine/N-succinyldiaminopimelate aminotransferase [EC:2.6.1.11 2.6.1.17]
K00822	0.0370858	0.0242835	0.00607087	0.15756	0.164681	0.0411703	<.0001	0.000112898	E2.6.1.18; beta-alanine--pyruvate transaminase [EC:2.6.1.18]
K00823	0	0	0	0.275996	0.544591	0.136148	0.0015	0.00242685	puuE; 4-aminobutyrate aminotransferase [EC:2.6.1.19]
K00824	5.46026	2.73169	0.682922	22.0966	6.74788	1.68697	<.0001	5.99662e-06	dat; D-alanine transaminase [EC:2.6.1.21]
K00826	204.871	37.2708	9.31771	278.601	20.7147	5.17867	<.0001	2.64595e-05	E2.6.1.42, ilvE; branched-chain amino acid aminotransferase [EC:2.6.1.42]
K00830	3.80312	3.93225	0.983063	4.05911	1.8176	0.454399	0.1871	0.208371	AGXT; alanine-glyoxylate transaminase / serine-glyoxylate transaminase / serine-pyruvate transaminase [EC:2.6.1.44 2.6.1.45 2.6.1.51]
K00831	221.808	41.2763	10.3191	317.926	19.9896	4.9974	<.0001	7.9474e-06	serC, PSAT1; phosphoserine aminotransferase [EC:2.6.1.52]
K00832	0.162339	0.155586	0.0388966	0.188291	0.652909	0.163227	0.0068	0.00999975	tyrB; aromatic-amino-acid transaminase [EC:2.6.1.57]
K00833	9.48604	5.36041	1.3401	5.47547	5.24275	1.31069	0.0037	0.00558518	bioA; adenosylmethionine---8-amino-7-oxononanoate aminotransferase [EC:2.6.1.62]
K00835	1.34491	1.2384	0.3096	2.50074	2.58215	0.645537	0.0899	0.105432	avtA; valine--pyruvate aminotransferase [EC:2.6.1.66]
K00836	13.7683	3.51596	0.87899	22.5578	13.9869	3.49672	0.0765	0.0905693	ectB, dat; diaminobutyrate-2-oxoglutarate transaminase [EC:2.6.1.76]
K00840	0	0	0	0.0808531	0.306064	0.0765161	0.0737	0.087769	astC; succinylornithine aminotransferase [EC:2.6.1.81]
K00841	0.017196	0.068784	0.017196	0.0299039	0.0835028	0.0208757	0.0478	0.0596739	patA; aminotransferase [EC:2.6.1.-]
K00844	0.564779	0.907492	0.226873	0.00159606	0.00500624	0.00125156	<.0001	5.38599e-06	HK; hexokinase [EC:2.7.1.1]
K00845	43.0391	29.9238	7.48095	2.22447	3.00137	0.750341	<.0001	7.9474e-06	glk; glucokinase [EC:2.7.1.2]
K00847	66.4897	14.0752	3.5188	100.755	16.7929	4.19824	<.0001	6.40768e-05	E2.7.1.4, scrK; fructokinase [EC:2.7.1.4]
K00848	105.615	28.0288	7.00721	169.333	23.3177	5.82942	<.0001	3.0485e-05	rhaB; rhamnulokinase [EC:2.7.1.5]
K00849	147.887	33.5837	8.39593	96.4049	22.1926	5.54816	<.0001	0.000175964	galK; galactokinase [EC:2.7.1.6]
K00850	127.782	31.1155	7.77888	124.342	17.095	4.27376	0.407	0.428762	pfkA, PFK; 6-phosphofructokinase 1 [EC:2.7.1.11]
K00851	0.383619	0.574177	0.143544	0.324925	0.581711	0.145428	0.8801	0.888078	E2.7.1.12, gntK, idnK; gluconokinase [EC:2.7.1.12]
K00852	40.0636	7.06605	1.76651	131.049	16.121	4.03026	<.0001	5.38599e-06	rbsK, RBKS; ribokinase [EC:2.7.1.15]
K00853	8.09049	3.54538	0.886346	65.267	13.9509	3.48774	<.0001	5.38599e-06	araB; L-ribulokinase [EC:2.7.1.16]
K00854	53.3485	15.2818	3.82045	67.7647	20.2322	5.05805	0.05	0.0620713	xylB, XYLB; xylulokinase [EC:2.7.1.17]
K00855	0.608249	0.671859	0.167965	0.815394	0.718528	0.179632	0.1871	0.208371	PRK, prkB; phosphoribulokinase [EC:2.7.1.19]
K00856	121.237	47.6261	11.9065	43.0976	12.2404	3.0601	<.0001	1.04859e-05	E2.7.1.20, ADK; adenosine kinase [EC:2.7.1.20]
K00857	187.728	18.5922	4.64804	164.401	21.9093	5.47733	0.0093	0.0132941	tdk, TK; thymidine kinase [EC:2.7.1.21]
K00858	236.46	30.2441	7.56102	314.332	13.7748	3.44371	<.0001	5.38599e-06	ppnK, NADK; NAD+ kinase [EC:2.7.1.23]
K00859	202.666	33.6154	8.40385	261.363	23.8897	5.97242	<.0001	6.40768e-05	coaE; dephospho-CoA kinase [EC:2.7.1.24]
K00860	0.173242	0.13843	0.0346075	0.113493	0.4345	0.108625	0.0001	0.000249814	cysC; adenylylsulfate kinase [EC:2.7.1.25]
K00864	105.863	25.9184	6.4796	138.169	17.9651	4.49126	0.0012	0.00193808	glpK, GK; glycerol kinase [EC:2.7.1.30]
K00865	118.01	27.1057	6.77641	122.61	20.5942	5.14855	0.6242	0.642607	glxK, garK; glycerate 2-kinase [EC:2.7.1.165]
K00867	1.99665	4.19534	1.04884	1.77954	5.07412	1.26853	0.2582	0.283517	coaA; type I pantothenate kinase [EC:2.7.1.33]
K00868	55.8565	11.4303	2.85757	117.38	20.5097	5.12742	<.0001	5.38599e-06	pdxK, pdxY; pyridoxine kinase [EC:2.7.1.35]
K00869	6.4032	8.1015	2.02538	6.4521	2.47509	0.618773	0.1134	0.131454	E2.7.1.36, MVK, mvaK1; mevalonate kinase [EC:2.7.1.36]
K00872	24.2952	6.44525	1.61131	55.911	8.78636	2.19659	<.0001	5.38599e-06	thrB; homoserine kinase [EC:2.7.1.39]
K00873	163.675	19.1611	4.79027	334.14	30.3634	7.59084	<.0001	5.38599e-06	PK, pyk; pyruvate kinase [EC:2.7.1.40]
K00874	176.132	45.9158	11.4789	194.627	23.7094	5.92735	0.2278	0.251576	kdgK; 2-dehydro-3-deoxygluconokinase [EC:2.7.1.45]
K00875	0.0158379	0.0209138	0.00522844	0.905921	0.945051	0.236263	<.0001	5.38599e-06	rbtK; D-ribulokinase [EC:2.7.1.47]
K00876	152.018	22.6671	5.66677	119.755	15.8082	3.95204	0.0005	0.00079122	udk, UCK; uridine kinase [EC:2.7.1.48]
K00878	34.7533	11.8005	2.95012	57.4222	12.292	3.07299	0.0001	0.000201456	thiM; hydroxyethylthiazole kinase [EC:2.7.1.50]
K00879	0.0222784	0.0133223	0.00333056	10.078	10.6937	2.67343	<.0001	5.38599e-06	fucK; L-fuculokinase [EC:2.7.1.51]
K00880	2.73599	1.93472	0.483679	6.02593	2.69433	0.673583	0.0006	0.00102927	lyxK; L-xylulokinase [EC:2.7.1.53]
K00881	1.20149	1.1234	0.280849	4.59439	3.44575	0.861439	<.0001	0.000112898	alsK; allose kinase [EC:2.7.1.55]
K00882	9.28852	5.83562	1.4589	26.006	4.91569	1.22892	<.0001	2.27944e-05	fruK; 1-phosphofructokinase [EC:2.7.1.56]
K00883	0.173371	0.103068	0.0257669	19.1485	4.28896	1.07224	<.0001	5.38599e-06	dgoK; 2-dehydro-3-deoxygalactonokinase [EC:2.7.1.58]
K00884	0.116594	0.152393	0.0380983	7.95927	5.46439	1.3661	<.0001	5.38599e-06	NAGK, nagK; N-acetylglucosamine kinase [EC:2.7.1.59]
K00885	0	0	0	0.143359	0.565725	0.141431	0.0737	0.087769	nanK; N-acylmannosamine kinase [EC:2.7.1.60]
K00886	1.27443	2.88385	0.720962	0.998553	2.34758	0.586895	0.4975	0.519495	ppgK; polyphosphate glucokinase [EC:2.7.1.63]
K00887	6.4112	2.99462	0.748655	11.8952	7.06285	1.76571	0.002	0.0031379	dgkA; undecaprenol kinase [EC:2.7.1.66]
K00888	2.35753	1.95167	0.487917	0	0	0	<.0001	5.38599e-06	PI4KA; phosphatidylinositol 4-kinase A [EC:2.7.1.67]
K00891	180.669	36.5251	9.13128	322.689	15.3631	3.84079	<.0001	5.38599e-06	aroK, aroL; shikimate kinase [EC:2.7.1.71]
K00892	0	0	0	0.168587	0.636795	0.159199	0.0171	0.0233006	gsk; inosine kinase [EC:2.7.1.73]
K00895	124.494	20.8143	5.20358	133.617	20.3647	5.09117	0.2744	0.300173	pfp, PFP; diphosphate-dependent phosphofructokinase [EC:2.7.1.90]
K00899	2.86772	1.65227	0.413068	5.96758	2.25952	0.564879	0.0002	0.000310146	mtnK; 5-methylthioribose kinase [EC:2.7.1.100]
K00901	19.2752	13.0637	3.26593	0.0437621	0.0761468	0.0190367	<.0001	5.38599e-06	dgkA, DGK; diacylglycerol kinase (ATP) [EC:2.7.1.107]
K00902	1.35109	1.09986	0.274966	0.0320783	0.0678361	0.016959	<.0001	7.33053e-06	DOLK; dolichol kinase [EC:2.7.1.108]
K00912	141.534	32.2616	8.06539	85.9833	30.0521	7.51302	0.0001	0.00026839	lpxK; tetraacyldisaccharide 4'-kinase [EC:2.7.1.130]
K00914	12.7419	10.2604	2.56509	0.00172838	0.00275018	0.000687546	<.0001	5.38599e-06	PIK3C3, VPS34; phosphatidylinositol 3-kinase [EC:2.7.1.137]
K00917	3.42603	1.91241	0.478102	3.52694	1.98503	0.496257	0.8211	0.832007	lacC; tagatose 6-phosphate kinase [EC:2.7.1.144]
K00918	0.30941	0.194998	0.0487496	1.20944	0.539679	0.13492	<.0001	1.66322e-05	pfkC; ADP-dependent phosphofructokinase/glucokinase [EC:2.7.1.146 2.7.1.147]
K00919	198.644	32.9289	8.23222	280.408	11.4412	2.8603	<.0001	5.38599e-06	ispE; 4-diphosphocytidyl-2-C-methyl-D-erythritol kinase [EC:2.7.1.148]
K00921	11.4233	9.89661	2.47415	0.00249006	0.00714824	0.00178706	<.0001	5.38599e-06	PIKFYVE, FAB1; 1-phosphatidylinositol-3-phosphate 5-kinase [EC:2.7.1.150]
K00925	301.871	48.7982	12.1995	418.18	47.4208	11.8552	<.0001	1.95324e-05	ackA; acetate kinase [EC:2.7.2.1]
K00926	89.981	16.6083	4.15207	52.3141	8.20864	2.05216	<.0001	5.99662e-06	arcC; carbamate kinase [EC:2.7.2.2]
K00927	289.936	43.3921	10.848	428.676	23.2682	5.81704	<.0001	5.38599e-06	PGK, pgk; phosphoglycerate kinase [EC:2.7.2.3]
K00928	47.9471	15.7279	3.93197	105.394	17.7419	4.43548	<.0001	5.38599e-06	lysC; aspartate kinase [EC:2.7.2.4]
K00929	137.855	32.8392	8.2098	105.157	17.1153	4.27883	0.0023	0.00352998	buk; butyrate kinase [EC:2.7.2.7]
K00930	147.231	31.6592	7.9148	212.658	12.5581	3.13954	<.0001	7.9474e-06	argB; acetylglutamate kinase [EC:2.7.2.8]
K00931	128.011	34.1563	8.53907	165.41	15.6831	3.92078	0.0007	0.00116369	proB; glutamate 5-kinase [EC:2.7.2.11]
K00932	0	0	0	0.184179	0.696363	0.174091	0.0359	0.0455167	tdcD; propionate kinase [EC:2.7.2.15]
K00937	73.8885	14.5898	3.64745	85.5266	21.9706	5.49266	0.1521	0.171147	ppk; polyphosphate kinase [EC:2.7.4.1]
K00938	0.153442	0.298958	0.0747396	0.958946	1.00254	0.250635	0.0001	0.000230941	E2.7.4.2, mvaK2; phosphomevalonate kinase [EC:2.7.4.2]
K00939	254.214	30.7521	7.68803	330.506	21.523	5.38076	<.0001	5.99662e-06	adk, AK; adenylate kinase [EC:2.7.4.3]
K00940	64.715	13.246	3.3115	57.9784	14.7791	3.69477	0.2136	0.236472	ndk, NME; nucleoside-diphosphate kinase [EC:2.7.4.6]
K00941	48.2552	14.1855	3.54637	111.892	23.7263	5.93158	<.0001	5.38599e-06	thiD; hydroxymethylpyrimidine/phosphomethylpyrimidine kinase [EC:2.7.1.49 2.7.4.7]
K00942	212.058	24.3875	6.09688	265.122	12.6268	3.1567	<.0001	6.88093e-06	E2.7.4.8, gmk; guanylate kinase [EC:2.7.4.8]
K00943	117.009	18.9025	4.72562	243.3	22.0122	5.50305	<.0001	5.38599e-06	tmk, DTYMK; dTMP kinase [EC:2.7.4.9]
K00945	198.001	35.2842	8.82105	284.883	14.8721	3.71803	<.0001	5.38599e-06	cmk; CMP/dCMP kinase [EC:2.7.4.25]
K00946	109.192	22.368	5.592	70.4422	27.7938	6.94845	0.0006	0.00102927	thiL; thiamine-monophosphate kinase [EC:2.7.4.16]
K00948	293.453	45.0115	11.2529	427.631	19.0437	4.76093	<.0001	5.38599e-06	PRPS, prsA; ribose-phosphate pyrophosphokinase [EC:2.7.6.1]
K00949	121.918	21.2158	5.30395	229.828	22.1081	5.52702	<.0001	5.38599e-06	thiN, TPK1, THI80; thiamine pyrophosphokinase [EC:2.7.6.2]
K00950	78.2617	22.26	5.56499	55.6722	16.4606	4.11516	0.0059	0.00878567	folK; 2-amino-4-hydroxy-6-hydroxymethyldihydropteridine diphosphokinase [EC:2.7.6.3]
K00951	0.759063	3.01921	0.754804	0.125784	0.456025	0.114006	0.8654	0.874271	relA; GTP pyrophosphokinase [EC:2.7.6.5]
K00952	3.843	5.32529	1.33132	4.18956	1.68897	0.422243	0.0382	0.0482745	nadM; nicotinamide-nucleotide adenylyltransferase [EC:2.7.7.1]
K00954	197.586	32.3919	8.09799	299.479	13.2558	3.31395	<.0001	5.38599e-06	E2.7.7.3A, coaD, kdtB; pantetheine-phosphate adenylyltransferase [EC:2.7.7.3]
K00955	0.767381	1.26363	0.315907	2.61068	1.60856	0.40214	0.0002	0.000355129	cysNC; bifunctional enzyme CysN/CysC [EC:2.7.7.4 2.7.1.25]
K00956	14.3213	7.27507	1.81877	10.685	8.87556	2.21889	0.0382	0.0482745	cysN; sulfate adenylyltransferase subunit 1 [EC:2.7.7.4]
K00957	17.2335	7.51592	1.87898	16.6621	7.90027	1.97507	0.7063	0.720517	cysD; sulfate adenylyltransferase subunit 2 [EC:2.7.7.4]
K00958	0.70278	0.704264	0.176066	1.1656	0.504504	0.126126	0.0075	0.0108475	sat, met3; sulfate adenylyltransferase [EC:2.7.7.4]
K00962	301.138	53.8259	13.4565	434.631	30.4111	7.60277	<.0001	5.99662e-06	pnp, PNPT1; polyribonucleotide nucleotidyltransferase [EC:2.7.7.8]
K00963	32.0044	13.4157	3.35393	58.3286	17.8914	4.47286	<.0001	7.34758e-05	UGP2, galU, galF; UTP--glucose-1-phosphate uridylyltransferase [EC:2.7.7.9]
K00965	1.44324	0.930248	0.232562	14.7111	6.12243	1.53061	<.0001	5.38599e-06	galT, GALT; UDPglucose--hexose-1-phosphate uridylyltransferase [EC:2.7.7.12]
K00966	6.77021	4.7283	1.18208	0.367087	0.238538	0.0596346	<.0001	7.9474e-06	GMPP; mannose-1-phosphate guanylyltransferase [EC:2.7.7.13]
K00967	10.8765	8.31764	2.07941	0.00490512	0.00921986	0.00230496	<.0001	5.38599e-06	PCYT2; ethanolamine-phosphate cytidylyltransferase [EC:2.7.7.14]
K00968	15.1652	11.268	2.817	0.0271109	0.0545739	0.0136435	<.0001	5.38599e-06	PCYT1; choline-phosphate cytidylyltransferase [EC:2.7.7.15]
K00969	209.818	34.6522	8.66304	293.888	16.9133	4.22832	<.0001	5.38599e-06	nadD; nicotinate-nucleotide adenylyltransferase [EC:2.7.7.18]
K00970	120.937	29.4328	7.35819	61.5656	21.4098	5.35246	<.0001	4.0984e-05	pcnB; poly(A) polymerase [EC:2.7.7.19]
K00971	313.517	67.186	16.7965	165.618	40.5882	10.1471	<.0001	2.64595e-05	manC, cpsB; mannose-1-phosphate guanylyltransferase [EC:2.7.7.13]
K00972	43.7519	19.0716	4.76789	42.6195	23.1555	5.78889	0.6785	0.694077	UAP1; UDP-N-acetylglucosamine/UDP-N-acetylgalactosamine diphosphorylase [EC:2.7.7.23 2.7.7.83]
K00973	296.881	44.7754	11.1939	243.187	32.2869	8.07173	0.002	0.0031379	rfbA, rmlA, rffH; glucose-1-phosphate thymidylyltransferase [EC:2.7.7.24]
K00974	78.7447	23.4245	5.85613	181.39	25.9191	6.47978	<.0001	5.99662e-06	cca; tRNA nucleotidyltransferase (CCA-adding enzyme) [EC:2.7.7.72 3.1.3.- 3.1.4.-]
K00975	193.941	36.5486	9.13714	488.212	61.1487	15.2872	<.0001	5.38599e-06	glgC; glucose-1-phosphate adenylyltransferase [EC:2.7.7.27]
K00978	68.1926	18.6781	4.66952	43.019	9.59259	2.39815	0.0001	0.000201456	rfbF; glucose-1-phosphate cytidylyltransferase [EC:2.7.7.33]
K00979	110.679	27.0971	6.77427	67.4023	20.9783	5.24457	0.0002	0.000310146	kdsB; 3-deoxy-manno-octulosonate cytidylyltransferase (CMP-KDO synthetase) [EC:2.7.7.38]
K00980	165.641	48.4451	12.1113	134.522	21.3885	5.34714	0.0458	0.0572048	tagD; glycerol-3-phosphate cytidylyltransferase [EC:2.7.7.39]
K00981	268.069	37.6052	9.40131	365.719	22.1862	5.54654	<.0001	5.38599e-06	E2.7.7.41, CDS1, CDS2, cdsA; phosphatidate cytidylyltransferase [EC:2.7.7.41]
K00983	0.454843	0.924333	0.231083	0.145208	0.208907	0.0522267	0.1166	0.135062	neuA; N-acylneuraminate cytidylyltransferase [EC:2.7.7.43]
K00988	3.22371	2.93423	0.733556	0	0	0	<.0001	5.38599e-06	APA1_2; sulfate adenylyltransferase (ADP) / ATP adenylyltransferase [EC:2.7.7.5 2.7.7.53]
K00990	1.99951	3.75853	0.939633	1.77857	3.79687	0.949218	0.6242	0.642607	glnD; [protein-PII] uridylyltransferase [EC:2.7.7.59]
K00991	85.9096	23.4544	5.86361	122.789	13.2418	3.31045	<.0001	6.40768e-05	ispD; 2-C-methyl-D-erythritol 4-phosphate cytidylyltransferase [EC:2.7.7.60]
K00992	102.092	24.5497	6.13743	27.4601	12.4905	3.12262	<.0001	5.99662e-06	murU; N-acetyl-alpha-D-muramate 1-phosphate uridylyltransferase [EC:2.7.7.99]
K00995	85.8824	16.6096	4.15241	232.378	33.5599	8.38998	<.0001	5.38599e-06	pgsA, PGS1; CDP-diacylglycerol---glycerol-3-phosphate 3-phosphatidyltransferase [EC:2.7.8.5]
K00997	34.8444	13.1964	3.2991	47.3582	9.64225	2.41056	0.0059	0.00878567	acpS; holo-[acyl-carrier protein] synthase [EC:2.7.8.7]
K00998	1.51188	3.59183	0.897958	1.21577	4.47537	1.11884	0.0083	0.0119796	pssA; CDP-diacylglycerol---serine O-phosphatidyltransferase [EC:2.7.8.8]
K00999	7.6161	5.85339	1.46335	0.00182469	0.00503859	0.00125965	<.0001	5.38599e-06	CDIPT; CDP-diacylglycerol--inositol 3-phosphatidyltransferase [EC:2.7.8.11]
K01000	250.36	45.4739	11.3685	343.071	28.8671	7.21678	<.0001	1.04859e-05	mraY; phospho-N-acetylmuramoyl-pentapeptide-transferase [EC:2.7.8.13]
K01001	9.17087	8.17199	2.043	3.81392	1.43723	0.359307	0.0176	0.0238336	ALG7; UDP-N-acetylglucosamine--dolichyl-phosphate N-acetylglucosaminephosphotransferase [EC:2.7.8.15]
K01003	0.0124901	0.0180611	0.00451528	0.117902	0.146348	0.036587	<.0001	4.88845e-05	bcpA; oxaloacetate decarboxylase [EC:4.1.1.112]
K01004	0.0560919	0.0467741	0.0116935	0.166493	0.140736	0.035184	0.0023	0.00352998	pcs; phosphatidylcholine synthase [EC:2.7.8.24]
K01006	341.794	46.3507	11.5877	457.855	37.2311	9.30778	<.0001	1.04859e-05	ppdK; pyruvate, orthophosphate dikinase [EC:2.7.9.1]
K01007	9.39089	7.53629	1.88407	10.7398	3.51604	0.879011	0.0237	0.03148	pps, ppsA; pyruvate, water dikinase [EC:2.7.9.2]
K01008	19.2197	31.3835	7.84588	38.2931	6.79048	1.69762	<.0001	5.56604e-05	selD, SEPHS; selenide, water dikinase [EC:2.7.9.3]
K01011	1.85641	1.31292	0.328229	1.37029	1.2572	0.314299	0.3271	0.348789	TST, MPST, sseA; thiosulfate/3-mercaptopyruvate sulfurtransferase [EC:2.8.1.1 2.8.1.2]
K01012	117.355	26.3887	6.59717	125.278	14.4053	3.60134	0.2913	0.316677	bioB; biotin synthase [EC:2.8.1.6]
K01026	8.49546	2.38534	0.596336	27.4213	6.92979	1.73245	<.0001	5.38599e-06	pct; propionate CoA-transferase [EC:2.8.3.1]
K01027	0.0183559	0.0180839	0.00452098	0.0782478	0.0757205	0.0189301	0.0036	0.00551549	OXCT; 3-oxoacid CoA-transferase [EC:2.8.3.5]
K01028	0.159281	0.0823987	0.0205997	0.680465	0.598728	0.149682	<.0001	3.52558e-05	E2.8.3.5A, scoA; 3-oxoacid CoA-transferase subunit A [EC:2.8.3.5]
K01029	0.157327	0.0823679	0.020592	0.659409	0.565447	0.141362	<.0001	2.64595e-05	E2.8.3.5B, scoB; 3-oxoacid CoA-transferase subunit B [EC:2.8.3.5]
K01031	0.0113434	0.0141185	0.00352962	0.0752981	0.0636581	0.0159145	0.0004	0.000691974	pcaI; 3-oxoadipate CoA-transferase, alpha subunit [EC:2.8.3.6]
K01032	0.0182476	0.0194379	0.00485947	0.102891	0.136935	0.0342337	0.0062	0.00918179	pcaJ; 3-oxoadipate CoA-transferase, beta subunit [EC:2.8.3.6]
K01034	31.1048	10.3221	2.58053	12.354	5.4483	1.36208	<.0001	3.52558e-05	atoD; acetate CoA/acetoacetate CoA-transferase alpha subunit [EC:2.8.3.8 2.8.3.9]
K01035	30.7174	11.3953	2.84883	8.50196	4.33213	1.08303	<.0001	1.95324e-05	atoA; acetate CoA/acetoacetate CoA-transferase beta subunit [EC:2.8.3.8 2.8.3.9]
K01039	1.95294	0.82147	0.205367	7.30586	2.97552	0.74388	<.0001	5.99662e-06	gctA; glutaconate CoA-transferase, subunit A [EC:2.8.3.12]
K01040	2.1996	0.900902	0.225226	7.13524	2.51384	0.628461	<.0001	7.9474e-06	gctB; glutaconate CoA-transferase, subunit B [EC:2.8.3.12]
K01042	5.55178	2.68679	0.671698	22.2811	6.32776	1.58194	<.0001	5.38599e-06	selA; L-seryl-tRNA(Ser) seleniumtransferase [EC:2.9.1.1]
K01046	39.5069	13.8924	3.47311	96.4353	39.4026	9.85064	<.0001	0.00013093	lip, TGL2; triacylglycerol lipase [EC:3.1.1.3]
K01047	1.11914	3.06693	0.766731	0.000620813	0.00248325	0.000620813	0.0251	0.0332224	PLA2G, SPLA2; secretory phospholipase A2 [EC:3.1.1.4]
K01048	14.3557	6.70496	1.67624	38.0859	15.3112	3.82779	<.0001	2.64595e-05	pldB; lysophospholipase [EC:3.1.1.5]
K01051	262.494	60.8799	15.22	42.6498	6.7593	1.68983	<.0001	5.38599e-06	E3.1.1.11; pectinesterase [EC:3.1.1.11]
K01052	50.3162	38.8954	9.72384	0.0128468	0.0214982	0.00537454	<.0001	5.38599e-06	LIPA; lysosomal acid lipase/cholesteryl ester hydrolase [EC:3.1.1.13]
K01053	17.7381	13.8765	3.46912	1.99408	1.24238	0.310596	<.0001	5.38599e-06	E3.1.1.17, gnl, RGN; gluconolactonase [EC:3.1.1.17]
K01054	12.2368	5.13941	1.28485	18.2042	4.59725	1.14931	0.0037	0.00558518	MGLL; acylglycerol lipase [EC:3.1.1.23]
K01055	0.580503	0.278586	0.0696466	1.58377	0.936872	0.234218	<.0001	0.000151881	pcaD; 3-oxoadipate enol-lactonase [EC:3.1.1.24]
K01057	0.274571	0.134698	0.0336745	2.11773	1.30681	0.326702	<.0001	5.38599e-06	PGLS, pgl, devB; 6-phosphogluconolactonase [EC:3.1.1.31]
K01058	17.4897	13.0565	3.26412	4.43001	5.77438	1.44359	0.0007	0.00116369	pldA; phospholipase A1/A2 [EC:3.1.1.32 3.1.1.4]
K01060	128.165	40.1543	10.0386	58.5323	12.0449	3.01122	<.0001	1.66322e-05	cah; cephalosporin-C deacetylase [EC:3.1.1.41]
K01061	2.48007	0.67333	0.168332	3.33208	1.8693	0.467325	0.4287	0.450049	E3.1.1.45; carboxymethylenebutenolidase [EC:3.1.1.45]
K01069	186.75	38.3676	9.5919	233.966	17.0273	4.25683	0.0003	0.000608085	gloB, gloC, HAGH; hydroxyacylglutathione hydrolase [EC:3.1.2.6]
K01070	0.0364498	0.0185956	0.0046489	0.455857	0.95759	0.239397	0.0002	0.00028904	frmB, ESD, fghA; S-formylglutathione hydrolase [EC:3.1.2.12]
K01074	24.5894	18.6265	4.65663	0.00378313	0.00838437	0.00209609	<.0001	5.38599e-06	PPT; palmitoyl-protein thioesterase [EC:3.1.2.22]
K01075	0.0528621	0.0441631	0.0110408	0.208999	0.233136	0.058284	0.0029	0.00442105	E3.1.2.23; 4-hydroxybenzoyl-CoA thioesterase [EC:3.1.2.23]
K01077	97.9807	30.1959	7.54898	159.8	28.9325	7.23311	<.0001	6.40768e-05	E3.1.3.1, phoA, phoB; alkaline phosphatase [EC:3.1.3.1]
K01079	78.5563	22.6279	5.65698	30.5906	16.2615	4.06537	<.0001	2.64595e-05	serB, PSPH; phosphoserine phosphatase [EC:3.1.3.3]
K01081	3.34879	3.20572	0.801429	11.0773	17.6747	4.41868	0.1521	0.171147	E3.1.3.5; 5'-nucleotidase [EC:3.1.3.5]
K01082	17.9752	7.57066	1.89267	19.2071	9.78453	2.44613	0.9699	0.971137	cysQ, MET22, BPNT1; 3'(2'), 5'-bisphosphate nucleotidase [EC:3.1.3.7]
K01085	25.5103	13.1565	3.28913	1.2383	0.742522	0.18563	<.0001	5.38599e-06	agp; glucose-1-phosphatase [EC:3.1.3.10]
K01087	0.045218	0.0664573	0.0166143	0.291928	0.623731	0.155933	0.0092	0.0131706	otsB; trehalose 6-phosphate phosphatase [EC:3.1.3.12]
K01089	71.7237	22.2056	5.5514	19.6235	13.2276	3.3069	<.0001	1.04859e-05	hisB; imidazoleglycerol-phosphate dehydratase / histidinol-phosphatase [EC:4.2.1.19 3.1.3.15]
K01091	346.855	60.1145	15.0286	494.131	25.301	6.32526	<.0001	5.38599e-06	gph; phosphoglycolate phosphatase [EC:3.1.3.18]
K01092	89.5102	17.9236	4.48091	73.1694	18.1561	4.53902	0.0143	0.0199165	E3.1.3.25, IMPA, suhB; myo-inositol-1(or 4)-monophosphatase [EC:3.1.3.25]
K01093	0	0	0	0.141477	0.55157	0.137893	0.0359	0.0455167	appA; 4-phytase / acid phosphatase [EC:3.1.3.26 3.1.3.2]
K01095	6.90225	5.19235	1.29809	7.85453	5.26194	1.31549	0.407	0.428762	pgpA; phosphatidylglycerophosphatase A [EC:3.1.3.27]
K01096	0	0	0	0.105285	0.406111	0.101528	0.0737	0.087769	pgpB; phosphatidylglycerophosphatase B [EC:3.1.3.27 3.1.3.81 3.1.3.4 3.6.1.27]
K01104	13.2575	4.18119	1.0453	5.7563	2.1174	0.529351	<.0001	1.95324e-05	E3.1.3.48; protein-tyrosine phosphatase [EC:3.1.3.48]
K01110	28.2535	22.4772	5.6193	0.00275044	0.00774076	0.00193519	<.0001	5.38599e-06	PTEN; phosphatidylinositol-3,4,5-trisphosphate 3-phosphatase and dual-specificity protein phosphatase PTEN [EC:3.1.3.16 3.1.3.48 3.1.3.67]
K01113	9.72563	7.62073	1.90518	0.323629	0.352988	0.0882469	<.0001	9.18181e-06	phoD; alkaline phosphatase D [EC:3.1.3.1]
K01114	0.137333	0.0664251	0.0166063	0.783419	0.728438	0.18211	<.0001	1.04859e-05	plc; phospholipase C [EC:3.1.4.3]
K01115	90.0433	69.3011	17.3253	0.101883	0.127501	0.0318753	<.0001	5.38599e-06	PLD1_2; phospholipase D1/2 [EC:3.1.4.4]
K01119	77.5022	26.6039	6.65098	23.1973	6.38959	1.5974	<.0001	5.38599e-06	cpdB; 2',3'-cyclic-nucleotide 2'-phosphodiesterase / 3'-nucleotidase [EC:3.1.4.16 3.1.3.6]
K01126	187.58	29.5906	7.39765	398.917	66.1613	16.5403	<.0001	5.38599e-06	E3.1.4.46, glpQ, ugpQ; glycerophosphoryl diester phosphodiesterase [EC:3.1.4.46]
K01129	240.059	49.9168	12.4792	368.036	26.8287	6.70719	<.0001	5.38599e-06	dgt; dGTPase [EC:3.1.5.1]
K01130	0.760619	0.472191	0.118048	7.29726	3.52816	0.88204	<.0001	5.38599e-06	E3.1.6.1, aslA; arylsulfatase [EC:3.1.6.1]
K01134	0.219773	0.194702	0.0486755	0.512453	0.388061	0.0970153	0.0067	0.00977542	ARSA; arylsulfatase A [EC:3.1.6.8]
K01135	0.606179	0.463404	0.115851	0.0328372	0.128239	0.0320597	<.0001	7.73387e-06	ARSB; arylsulfatase B [EC:3.1.6.12]
K01136	0.861272	0.957465	0.239366	0.526431	0.756815	0.189204	0.0645	0.0789285	IDS; iduronate 2-sulfatase [EC:3.1.6.13]
K01139	95.6341	18.7958	4.69895	215.962	38.2588	9.5647	<.0001	5.38599e-06	spoT; GTP diphosphokinase / guanosine-3',5'-bis(diphosphate) 3'-diphosphatase [EC:2.7.6.5 3.1.7.2]
K01141	4.46444	3.02023	0.755057	2.74032	2.45786	0.614466	0.0382	0.0482745	sbcB, exoI; exodeoxyribonuclease I [EC:3.1.11.1]
K01142	216.084	30.9474	7.73685	226.624	26.4762	6.61906	0.2744	0.300173	E3.1.11.2, xthA; exodeoxyribonuclease III [EC:3.1.11.2]
K01148	22.1877	17.8982	4.47454	0.00668281	0.00980201	0.0024505	<.0001	5.38599e-06	PARN, PNLDC1; poly(A)-specific ribonuclease [EC:3.1.13.4]
K01151	80.795	11.3982	2.84955	222.378	14.1798	3.54495	<.0001	5.38599e-06	nfo; deoxyribonuclease IV [EC:3.1.21.2]
K01158	17.063	13.0723	3.26807	0.00380663	0.0117167	0.00292918	<.0001	5.38599e-06	DNASE2; deoxyribonuclease II [EC:3.1.22.1]
K01159	177.867	29.9624	7.49061	223.832	14.1041	3.52602	<.0001	6.40768e-05	ruvC; crossover junction endodeoxyribonuclease RuvC [EC:3.1.22.4]
K01164	1.82448	1.4765	0.369126	0.00106875	0.004275	0.00106875	<.0001	5.38599e-06	POP1; ribonuclease P/MRP protein subunit POP1 [EC:3.1.26.5]
K01173	322.126	73.9163	18.4791	151.514	77.3243	19.3311	<.0001	4.78987e-05	ENDOG; endonuclease G, mitochondrial
K01176	183.992	52.9793	13.2448	82.557	23.5243	5.88108	<.0001	9.18181e-06	AMY, amyA, malS; alpha-amylase [EC:3.2.1.1]
K01178	11.4189	8.21609	2.05402	18.9834	9.3748	2.3437	0.0262	0.0344475	SGA1; glucoamylase [EC:3.2.1.3]
K01179	263.559	63.9814	15.9953	91.7672	68.1063	17.0266	<.0001	4.0984e-05	E3.2.1.4; endoglucanase [EC:3.2.1.4]
K01182	5.91454	3.15983	0.789958	6.15422	3.0346	0.75865	0.6785	0.694077	IMA, malL; oligo-1,6-glucosidase [EC:3.2.1.10]
K01183	74.1234	22.5516	5.63791	65.9597	18.1369	4.53423	0.1871	0.208371	E3.2.1.14; chitinase [EC:3.2.1.14]
K01186	44.7945	21.6473	5.41183	53.9991	29.6032	7.4008	0.386	0.407501	NEU1; sialidase-1 [EC:3.2.1.18]
K01187	8.85529	7.43203	1.85801	37.0439	10.3415	2.58537	<.0001	1.66322e-05	malZ; alpha-glucosidase [EC:3.2.1.20]
K01190	754.711	208.1	52.0251	606.542	45.5174	11.3793	0.0116	0.0163213	lacZ; beta-galactosidase [EC:3.2.1.23]
K01191	24.3331	7.81698	1.95424	188.645	71.3335	17.8334	<.0001	5.38599e-06	MAN2C1; alpha-mannosidase [EC:3.2.1.24]
K01192	85.8022	25.0122	6.25305	134.728	25.8237	6.45593	<.0001	8.51833e-05	E3.2.1.25, MANBA, manB; beta-mannosidase [EC:3.2.1.25]
K01193	22.0923	8.15519	2.0388	8.56924	2.85265	0.713163	<.0001	6.88093e-06	INV, sacA; beta-fructofuranosidase [EC:3.2.1.26]
K01194	3.21202	2.14862	0.537156	24.1022	10.461	2.61525	<.0001	5.38599e-06	TREH, treA, treF; alpha,alpha-trehalase [EC:3.2.1.28]
K01195	58.2753	17.4449	4.36123	28.5192	6.46306	1.61576	<.0001	6.88093e-06	uidA, GUSB; beta-glucuronidase [EC:3.2.1.31]
K01196	13.9641	11.059	2.76474	0.00234806	0.00416837	0.00104209	<.0001	5.38599e-06	AGL; glycogen debranching enzyme [EC:2.4.1.25 3.2.1.33]
K01197	1.02493	0.763542	0.190885	8.66302	5.20167	1.30042	<.0001	3.52558e-05	hya; hyaluronoglucosaminidase [EC:3.2.1.35]
K01198	329.697	92.4927	23.1232	91.0197	19.3055	4.82639	<.0001	5.38599e-06	xynB; xylan 1,4-beta-xylosidase [EC:3.2.1.37]
K01200	108.681	33.4741	8.36853	158.167	42.5157	10.6289	0.0004	0.000691974	pulA; pullulanase [EC:3.2.1.41]
K01201	64.5605	16.4971	4.12427	66.231	16.0484	4.01209	0.91	0.916097	GBA, srfJ; glucosylceramidase [EC:3.2.1.45]
K01202	5.34087	3.12149	0.780372	0.787184	0.886866	0.221717	<.0001	1.42253e-05	GALC; galactosylceramidase [EC:3.2.1.46]
K01205	89.6924	25.239	6.30974	71.6941	18.4483	4.61208	0.0195	0.0261937	NAGLU; alpha-N-acetylglucosaminidase [EC:3.2.1.50]
K01206	333.052	79.7719	19.943	411.819	58.5495	14.6374	0.0104	0.0147395	FUCA; alpha-L-fucosidase [EC:3.2.1.51]
K01207	211.481	38.6845	9.67111	218.773	21.292	5.32299	0.4739	0.495769	nagZ; beta-N-acetylhexosaminidase [EC:3.2.1.52]
K01208	25.4842	11.5502	2.88755	60.5796	19.5901	4.89753	<.0001	2.64595e-05	cd, ma, nplT; cyclomaltodextrinase / maltogenic alpha-amylase / neopullulanase [EC:3.2.1.54 3.2.1.133 3.2.1.135]
K01209	442.725	114.633	28.6582	243.766	40.9182	10.2295	<.0001	4.0984e-05	abfA; alpha-L-arabinofuranosidase [EC:3.2.1.55]
K01210	1.84772	0.674518	0.168629	0.717597	0.496447	0.124112	<.0001	9.82894e-05	E3.2.1.58; glucan 1,3-beta-glucosidase [EC:3.2.1.58]
K01214	40.1524	15.0347	3.75869	13.8644	5.62906	1.40726	<.0001	1.42253e-05	ISA, treX; isoamylase [EC:3.2.1.68]
K01218	254.419	48.8156	12.2039	96.7028	38.2858	9.57144	<.0001	7.9474e-06	gmuG; mannan endo-1,4-beta-mannosidase [EC:3.2.1.78]
K01220	0.310401	0.393733	0.0984331	0.653918	1.04938	0.262345	0.1416	0.162365	E3.2.1.85, lacG; 6-phospho-beta-galactosidase [EC:3.2.1.85]
K01222	1.65448	0.670837	0.167709	22.4595	7.72203	1.93051	<.0001	5.38599e-06	E3.2.1.86A, celF; 6-phospho-beta-glucosidase [EC:3.2.1.86]
K01223	16.7131	6.85205	1.71301	31.5818	16.8884	4.2221	0.0026	0.00395853	E3.2.1.86B, bglA; 6-phospho-beta-glucosidase [EC:3.2.1.86]
K01226	2.42718	1.35049	0.337622	2.70622	1.93405	0.483513	0.91	0.916097	treC; trehalose-6-phosphate hydrolase [EC:3.2.1.93]
K01227	0	0	0	0.572051	0.757227	0.189307	<.0001	5.38599e-06	ENGASE; mannosyl-glycoprotein endo-beta-N-acetylglucosaminidase [EC:3.2.1.96]
K01228	1.7747	1.39632	0.34908	0	0	0	<.0001	5.38599e-06	MOGS; mannosyl-oligosaccharide glucosidase [EC:3.2.1.106]
K01232	1.6119	2.11911	0.529777	4.63922	3.03462	0.758655	0.0008	0.00132396	glvA; maltose-6'-phosphate glucosidase [EC:3.2.1.122]
K01233	0.538536	0.969991	0.242498	0.411001	0.353213	0.0883033	0.763	0.775886	csn; chitosanase [EC:3.2.1.132]
K01236	1.46174	4.19112	1.04778	0.123813	0.116472	0.029118	0.0546	0.0671479	treZ, glgZ; maltooligosyltrehalose trehalohydrolase [EC:3.2.1.141]
K01241	17.4162	7.99071	1.99768	10.3507	4.76587	1.19147	0.0083	0.0119796	amn; AMP nucleosidase [EC:3.2.2.4]
K01243	173.784	25.3842	6.34606	196.034	24.254	6.0635	0.0317	0.0410843	mtnN, mtn, pfs; adenosylhomocysteine nucleosidase [EC:3.2.2.9]
K01244	2.39184	1.76144	0.44036	0.032762	0.105465	0.0263663	<.0001	5.38599e-06	MTN; 5'-methylthioadenosine nucleosidase [EC:3.2.2.16]
K01246	51.5051	15.5627	3.89068	73.4752	13.4116	3.35291	0.0007	0.00116369	tag; DNA-3-methyladenine glycosylase I [EC:3.2.2.20]
K01247	10.1164	4.70753	1.17688	9.0446	2.32127	0.580317	0.8505	0.859459	alkA; DNA-3-methyladenine glycosylase II [EC:3.2.2.21]
K01251	94.8453	24.9903	6.24757	111.061	19.9554	4.98885	0.0237	0.03148	E3.3.1.1, ahcY; adenosylhomocysteinase [EC:3.3.1.1]
K01252	0	0	0	0.141764	0.539857	0.134964	0.0737	0.087769	entB, dhbB, vibB, mxcF; bifunctional isochorismate lyase / aryl carrier protein [EC:3.3.2.1 6.3.2.14]
K01254	0.0931835	0.162417	0.0406042	0.0721439	0.0860522	0.0215131	0.451	0.472614	LTA4H; leukotriene-A4 hydrolase [EC:3.3.2.6]
K01255	15.9344	5.2495	1.31238	10.3938	4.41079	1.1027	0.0023	0.00352998	CARP, pepA; leucyl aminopeptidase [EC:3.4.11.1]
K01256	13.966	8.71892	2.17973	3.47926	4.16378	1.04094	<.0001	0.000112898	pepN; aminopeptidase N [EC:3.4.11.2]
K01259	17.6822	6.71085	1.67771	4.14222	0.967158	0.241789	<.0001	5.38599e-06	pip; proline iminopeptidase [EC:3.4.11.5]
K01270	333.47	72.6548	18.1637	284.937	37.4885	9.37213	0.0382	0.0482745	pepD; dipeptidase D [EC:3.4.13.-]
K01275	2.12987	2.08009	0.520022	0	0	0	<.0001	5.38599e-06	CTSC; cathepsin C [EC:3.4.14.1]
K01278	131.463	36.9732	9.24329	46.6883	18.0582	4.51455	<.0001	1.66322e-05	DPP4, CD26; dipeptidyl-peptidase 4 [EC:3.4.14.5]
K01283	0.34425	0.428819	0.107205	0.472393	0.710523	0.177631	0.7915	0.804455	ACE, CD143; peptidyl-dipeptidase A [EC:3.4.15.1]
K01307	10.2441	8.20029	2.05007	0.00117806	0.00471225	0.00117806	<.0001	5.38599e-06	GGH; gamma-glutamyl hydrolase [EC:3.4.19.9]
K01318	5.1258	2.50519	0.626296	3.69278	2.74196	0.68549	0.083	0.0978632	sspA; glutamyl endopeptidase [EC:3.4.21.19]
K01322	48.4905	15.9717	3.99292	14.1574	7.5086	1.87715	<.0001	7.9474e-06	PREP; prolyl oligopeptidase [EC:3.4.21.26]
K01338	190.333	38.4093	9.60233	235.651	20.8106	5.20264	0.0003	0.000531645	lon; ATP-dependent Lon protease [EC:3.4.21.53]
K01354	7.41333	5.80049	1.45012	6.25465	5.65578	1.41395	0.7919	0.804455	ptrB; oligopeptidase B [EC:3.4.21.83]
K01358	452.008	136.39	34.0976	497.459	30.6133	7.65333	0.0014	0.00219027	clpP, CLPP; ATP-dependent Clp protease, protease subunit [EC:3.4.21.92]
K01363	61.9013	49.0858	12.2715	0.0227539	0.0291443	0.00728607	<.0001	5.38599e-06	CTSB; cathepsin B [EC:3.4.22.1]
K01369	25.7653	22.4322	5.60805	0.0035865	0.00694807	0.00173702	<.0001	5.38599e-06	LGMN; legumain [EC:3.4.22.34]
K01373	0.0527986	0.143013	0.0357531	0	0	0	0.0015	0.00242685	CTSF; cathepsin F [EC:3.4.22.41]
K01406	29.3195	19.7084	4.92711	8.51391	10.2354	2.55884	<.0001	0.000112898	prtC; serralysin [EC:3.4.24.40]
K01424	169.624	35.2064	8.80159	160.698	21.257	5.31425	0.2427	0.267552	E3.5.1.1, ansA, ansB; L-asparaginase [EC:3.5.1.1]
K01425	53.1815	10.6733	2.66832	53.4407	12.386	3.09651	0.91	0.916097	glsA, GLS; glutaminase [EC:3.5.1.2]
K01426	5.62193	1.48799	0.371997	12.6464	4.56697	1.14174	<.0001	7.9474e-06	E3.5.1.4, amiE; amidase [EC:3.5.1.4]
K01428	1.36793	1.01856	0.254641	7.05791	4.3323	1.08308	<.0001	1.42253e-05	ureC; urease subunit alpha [EC:3.5.1.5]
K01429	1.02566	0.823053	0.205763	6.48936	3.76959	0.942396	<.0001	1.04859e-05	ureB; urease subunit beta [EC:3.5.1.5]
K01430	0.83596	0.629528	0.157382	1.18205	1.39945	0.349863	0.5977	0.617294	ureA; urease subunit gamma [EC:3.5.1.5]
K01432	0.687335	0.787361	0.19684	0.297098	0.250594	0.0626485	0.2744	0.300173	AFMID; arylformamidase [EC:3.5.1.9]
K01433	62.7796	19.4188	4.8547	7.74551	8.17293	2.04323	<.0001	5.99662e-06	purU; formyltetrahydrofolate deformylase [EC:3.5.1.10]
K01434	2.42984	2.41684	0.604209	0.919221	0.947044	0.236761	0.05	0.0620713	pac; penicillin G amidase [EC:3.5.1.11]
K01438	12.6217	7.80085	1.95021	13.7452	5.37467	1.34367	0.407	0.428762	argE; acetylornithine deacetylase [EC:3.5.1.16]
K01439	1.33154	1.97149	0.492874	4.68488	5.50683	1.37671	<.0001	9.82894e-05	dapE; succinyl-diaminopimelate desuccinylase [EC:3.5.1.18]
K01442	10.2077	3.38806	0.847014	95.3268	16.6452	4.16131	<.0001	5.38599e-06	cbh; choloylglycine hydrolase [EC:3.5.1.24]
K01443	72.0822	16.2903	4.07256	367.304	33.2608	8.31519	<.0001	5.38599e-06	nagA, AMDHD2; N-acetylglucosamine-6-phosphate deacetylase [EC:3.5.1.25]
K01444	0.307068	0.208993	0.0522483	2.57295	1.56071	0.390178	<.0001	5.38599e-06	AGA, aspG; N4-(beta-N-acetylglucosaminyl)-L-asparaginase [EC:3.5.1.26]
K01448	451.142	81.3192	20.3298	894.591	66.8217	16.7054	<.0001	5.38599e-06	amiABC; N-acetylmuramoyl-L-alanine amidase [EC:3.5.1.28]
K01451	0.0743749	0.0486895	0.0121724	0.479949	0.604326	0.151081	<.0001	9.82894e-05	hipO; hippurate hydrolase [EC:3.5.1.32]
K01455	0.176169	0.239521	0.0598803	1.4829	0.435964	0.108991	<.0001	7.9474e-06	E3.5.1.49; formamidase [EC:3.5.1.49]
K01456	7.69241	5.85164	1.46291	0.0147959	0.048116	0.012029	<.0001	5.38599e-06	E3.5.1.52, NGLY1, PNG1; peptide-N4-(N-acetyl-beta-glucosaminyl)asparagine amidase [EC:3.5.1.52]
K01457	0.678407	0.616906	0.154227	0.129054	0.148708	0.0371771	0.0001	0.00026839	atzF; allophanate hydrolase [EC:3.5.1.54]
K01458	9.53248	4.6597	1.16492	5.5736	2.52485	0.631212	0.0116	0.0163213	hutG; N-formylglutamate deformylase [EC:3.5.1.68]
K01460	0	0	0	0.178132	0.676114	0.169029	0.0171	0.0233006	gsp; glutathionylspermidine amidase/synthetase [EC:3.5.1.78 6.3.1.8]
K01464	11.1484	3.64123	0.910306	14.0676	4.21	1.0525	0.05	0.0620713	DPYS, dht, hydA; dihydropyrimidinase [EC:3.5.2.2]
K01465	165.026	40.959	10.2397	238.452	24.6212	6.15529	<.0001	5.56604e-05	URA4, pyrC; dihydroorotase [EC:3.5.2.3]
K01466	0.663713	0.711685	0.177921	2.32463	1.44184	0.36046	0.0001	0.000232838	allB; allantoinase [EC:3.5.2.5]
K01467	0.137621	0.116429	0.0291073	0.522544	0.633651	0.158413	0.0014	0.00219027	ampC; beta-lactamase class C [EC:3.5.2.6]
K01468	66.5652	18.5303	4.63259	45.4849	10.8233	2.70582	0.0009	0.00150255	hutI, AMDHD1; imidazolonepropionase [EC:3.5.2.7]
K01470	15.2248	4.01582	1.00395	114.785	19.7755	4.94388	<.0001	5.38599e-06	E3.5.2.10; creatinine amidohydrolase [EC:3.5.2.10]
K01473	0.349715	0.323049	0.0807623	4.82408	2.01886	0.504714	<.0001	5.38599e-06	hyuA; N-methylhydantoinase A [EC:3.5.2.14]
K01474	0.245406	0.215968	0.0539921	4.18542	1.57313	0.393282	<.0001	5.38599e-06	hyuB; N-methylhydantoinase B [EC:3.5.2.14]
K01476	17.1298	6.83863	1.70966	15.8378	7.40029	1.85007	0.451	0.472614	E3.5.3.1, rocF, arg; arginase [EC:3.5.3.1]
K01477	0.00206894	0.00827575	0.00206894	0.0307511	0.0626847	0.0156712	0.0162	0.0224548	alc, ALLC; allantoicase [EC:3.5.3.4]
K01478	88.4094	18.9067	4.72667	55.7736	8.13215	2.03304	<.0001	1.95324e-05	arcA; arginine deiminase [EC:3.5.3.6]
K01479	28.0928	9.96681	2.4917	13.9982	10.1338	2.53344	0.0009	0.00150255	hutG; formiminoglutamase [EC:3.5.3.8]
K01480	33.4505	11.2231	2.80579	40.7266	11.159	2.78975	0.0765	0.0905693	speB; agmatinase [EC:3.5.3.11]
K01483	0.371301	0.235065	0.0587663	11.1348	1.85303	0.463257	<.0001	5.38599e-06	allA; ureidoglycolate lyase [EC:4.3.2.3]
K01484	0	0	0	0.0880575	0.32844	0.08211	0.0171	0.0233006	astB; succinylarginine dihydrolase [EC:3.5.3.23]
K01485	5.20649	1.80147	0.450367	5.35121	4.45235	1.11309	0.1748	0.195497	codA; cytosine/creatinine deaminase [EC:3.5.4.1 3.5.4.21]
K01486	48.159	15.3071	3.82677	60.9714	11.7978	2.94944	0.0262	0.0344475	ade; adenine deaminase [EC:3.5.4.2]
K01487	47.618	12.5952	3.1488	22.6543	4.47053	1.11763	<.0001	5.38599e-06	E3.5.4.3, guaD; guanine deaminase [EC:3.5.4.3]
K01488	21.7024	9.2768	2.3192	23.0592	10.1726	2.54315	0.8505	0.859459	add, ADA; adenosine deaminase [EC:3.5.4.4]
K01489	208.026	31.4582	7.86455	242.188	21.8996	5.47489	0.0026	0.00395853	cdd, CDA; cytidine deaminase [EC:3.5.4.5]
K01490	0	0	0	0.0645443	0.099458	0.0248645	0.0002	0.000445932	AMPD; AMP deaminase [EC:3.5.4.6]
K01491	159.302	36.3646	9.09114	197.099	26.1325	6.53313	0.0026	0.00395853	folD; methylenetetrahydrofolate dehydrogenase (NADP+) / methenyltetrahydrofolate cyclohydrolase [EC:1.5.1.5 3.5.4.9]
K01493	220.916	34.1022	8.52554	310.855	25.91	6.47749	<.0001	5.38599e-06	comEB; dCMP deaminase [EC:3.5.4.12]
K01494	27.4258	12.5714	3.14285	29.2528	7.51232	1.87808	0.2136	0.236472	dcd; dCTP deaminase [EC:3.5.4.13]
K01495	151.84	33.9152	8.47881	94.8677	14.8937	3.72344	<.0001	7.34758e-05	GCH1, folE; GTP cyclohydrolase IA [EC:3.5.4.16]
K01496	8.25337	4.20779	1.05195	11.4892	3.27896	0.81974	0.0075	0.0108475	hisI; phosphoribosyl-AMP cyclohydrolase [EC:3.5.4.19]
K01497	3.14285	3.24526	0.811314	1.92392	3.0237	0.755926	0.0015	0.00246344	ribA, RIB1; GTP cyclohydrolase II [EC:3.5.4.25]
K01499	4.39571	6.18798	1.54699	4.80399	1.76574	0.441435	0.0348	0.0448219	mch; methenyltetrahydromethanopterin cyclohydrolase [EC:3.5.4.27]
K01500	27.0433	8.76217	2.19054	64.1519	11.1536	2.78839	<.0001	5.38599e-06	fchA; methenyltetrahydrofolate cyclohydrolase [EC:3.5.4.9]
K01501	3.6569	1.34089	0.335223	8.48924	3.0248	0.756201	<.0001	2.64595e-05	E3.5.5.1; nitrilase [EC:3.5.5.1]
K01505	0.136676	0.113881	0.0284702	0.588397	0.532516	0.133129	0.0001	0.000232838	E3.5.99.7; 1-aminocyclopropane-1-carboxylate deaminase [EC:3.5.99.7]
K01507	43.0306	11.6024	2.90061	186.442	31.2984	7.82459	<.0001	5.38599e-06	ppa; inorganic pyrophosphatase [EC:3.6.1.1]
K01512	15.7926	3.29681	0.824202	6.31398	1.95085	0.487713	<.0001	5.99662e-06	acyP; acylphosphatase [EC:3.6.1.7]
K01515	107.676	19.303	4.82575	151.546	17.2843	4.32107	<.0001	9.18181e-06	nudF; ADP-ribose pyrophosphatase [EC:3.6.1.13]
K01517	0.755343	0.744889	0.186222	1.70986	0.934043	0.233511	0.0004	0.000691974	ADPRM; manganese-dependent ADP-ribose/CDP-alcohol diphosphatase [EC:3.6.1.13 3.6.1.16 3.6.1.53]
K01518	27.1754	8.24987	2.06247	74.7626	17.1463	4.28658	<.0001	1.04859e-05	NUDT2; bis(5'-nucleosidyl)-tetraphosphatase [EC:3.6.1.17]
K01519	274.571	36.125	9.03124	339.189	23.4143	5.85358	<.0001	2.64595e-05	ITPA; inosine triphosphate pyrophosphatase [EC:3.6.1.-]
K01520	274.122	41.236	10.309	303.8	26.0116	6.50289	0.0159	0.021941	dut, DUT; dUTP pyrophosphatase [EC:3.6.1.23]
K01521	0.014089	0.020103	0.00502576	0.203126	0.640042	0.160011	0.0513	0.0636951	cdh; CDP-diacylglycerol pyrophosphatase [EC:3.6.1.26]
K01523	6.09195	3.87155	0.967887	6.93156	2.59285	0.648212	0.2582	0.283517	hisE; phosphoribosyl-ATP pyrophosphohydrolase [EC:3.6.1.31]
K01524	46.9083	13.9341	3.48351	60.3902	12.022	3.00551	0.0195	0.0261937	ppx-gppA; exopolyphosphatase / guanosine-5'-triphosphate,3'-diphosphate pyrophosphatase [EC:3.6.1.11 3.6.1.40]
K01525	1.55798	3.1091	0.777274	0.906939	2.85325	0.713311	0.0075	0.0108475	apaH; bis(5'-nucleosyl)-tetraphosphatase (symmetrical) [EC:3.6.1.41]
K01527	9.63964	7.61343	1.90336	0	0	0	<.0001	5.38599e-06	EGD1, BTF3; nascent polypeptide-associated complex subunit beta
K01535	0.0137433	0.0117084	0.00292711	0.118172	0.145132	0.0362831	<.0001	4.01833e-05	PMA1, PMA2; H+-transporting ATPase [EC:7.1.2.1]
K01545	0.00585331	0.0159944	0.00399859	0.0162126	0.0329548	0.0082387	0.376	0.397702	kdpF; potassium-transporting ATPase KdpF subunit
K01546	0.267823	0.128473	0.0321183	1.35142	1.28237	0.320592	<.0001	0.00013093	kdpA; potassium-transporting ATPase potassium-binding subunit
K01547	0.247731	0.14577	0.0364424	1.26548	1.08809	0.272023	<.0001	3.0485e-05	kdpB; potassium-transporting ATPase ATP-binding subunit [EC:7.2.2.6]
K01548	0.207552	0.106133	0.0265332	0.981328	0.946163	0.236541	0.0001	0.00026839	kdpC; potassium-transporting ATPase KdpC subunit
K01555	0.0882459	0.0447039	0.011176	0.391161	0.409511	0.102378	<.0001	2.64595e-05	FAH, fahA; fumarylacetoacetase [EC:3.7.1.2]
K01556	0.31303	0.177656	0.0444141	6.50697	2.22281	0.555703	<.0001	5.38599e-06	KYNU, kynU; kynureninase [EC:3.7.1.3]
K01557	0	0	0	0.170341	0.386219	0.0965548	<.0001	0.000178207	FAHD1; acylpyruvate hydrolase [EC:3.7.1.5]
K01560	0.307558	0.119418	0.0298545	1.90325	1.25216	0.313039	<.0001	5.38599e-06	E3.8.1.2; 2-haloacid dehalogenase [EC:3.8.1.2]
K01561	1.47247	1.03379	0.258447	0.137677	0.136485	0.0341211	<.0001	1.21479e-05	dehH; haloacetate dehalogenase [EC:3.8.1.3]
K01563	0.040053	0.0406769	0.0101692	0.254912	0.299639	0.0749098	<.0001	4.08585e-05	dhaA; haloalkane dehalogenase [EC:3.8.1.5]
K01565	5.25103	3.07622	0.769055	4.56769	4.62036	1.15509	0.2136	0.236472	SGSH; N-sulfoglucosamine sulfohydrolase [EC:3.10.1.1]
K01569	0.0715354	0.0487251	0.0121813	0.239667	0.268674	0.0671686	0.0734	0.087769	oxdD; oxalate decarboxylase [EC:4.1.1.2]
K01571	3.82984	2.37504	0.593761	0.748243	0.999938	0.249985	<.0001	7.34758e-05	oadA; oxaloacetate decarboxylase (Na+ extruding) subunit alpha [EC:7.2.4.2]
K01573	6.76565	2.97486	0.743714	2.06848	2.29041	0.572602	<.0001	0.000112898	oadG; oxaloacetate decarboxylase (Na+ extruding) subunit gamma
K01574	0.101419	0.0663632	0.0165908	0.517502	0.453931	0.113483	<.0001	7.34758e-05	adc; acetoacetate decarboxylase [EC:4.1.1.4]
K01575	40.1842	8.55767	2.13942	9.48934	3.26467	0.816168	<.0001	5.38599e-06	alsD, budA, aldC; acetolactate decarboxylase [EC:4.1.1.5]
K01576	0.0673612	0.0322874	0.00807185	0.353457	0.390845	0.0977114	<.0001	2.64595e-05	mdlC; benzoylformate decarboxylase [EC:4.1.1.7]
K01577	0.146173	0.144454	0.0361134	6.9914	4.15635	1.03909	<.0001	5.38599e-06	oxc; oxalyl-CoA decarboxylase [EC:4.1.1.8]
K01578	0.0162494	0.0153058	0.00382646	0.120139	0.172212	0.0430531	<.0001	0.000187709	MLYCD; malonyl-CoA decarboxylase [EC:4.1.1.9]
K01579	62.7206	17.5227	4.38067	46.666	21.3974	5.34934	0.0382	0.0482745	panD; aspartate 1-decarboxylase [EC:4.1.1.11]
K01580	0.0107735	0.0104285	0.00260713	49.5075	21.1476	5.2869	<.0001	5.38599e-06	E4.1.1.15, gadB, gadA, GAD; glutamate decarboxylase [EC:4.1.1.15]
K01581	11.9591	5.53991	1.38498	4.00797	1.87654	0.469136	<.0001	2.64595e-05	E4.1.1.17, ODC1, speC, speF; ornithine decarboxylase [EC:4.1.1.17]
K01582	0.000489125	0.0019565	0.000489125	0.387694	1.49693	0.374233	0.0027	0.00410382	E4.1.1.18, ldcC, cadA; lysine decarboxylase [EC:4.1.1.18]
K01584	0.182975	0.184761	0.0461903	0.459352	0.825015	0.206254	0.4506	0.472614	adiA; arginine decarboxylase [EC:4.1.1.19]
K01585	144.358	37.8153	9.45381	80.882	24.0852	6.0213	<.0001	8.51833e-05	speA; arginine decarboxylase [EC:4.1.1.19]
K01586	188.161	30.6547	7.66368	261.487	16.363	4.09075	<.0001	5.99662e-06	lysA; diaminopimelate decarboxylase [EC:4.1.1.20]
K01588	155.927	34.5122	8.62805	218.664	15.3056	3.8264	<.0001	6.40768e-05	purE; 5-(carboxyamino)imidazole ribonucleotide mutase [EC:5.4.99.18]
K01589	1.11969	1.71211	0.428026	1.12024	1.07703	0.269258	0.6785	0.694077	purK; 5-(carboxyamino)imidazole ribonucleotide synthase [EC:6.3.4.18]
K01591	174.483	39.101	9.77525	260.33	16.0299	4.00748	<.0001	6.88093e-06	pyrF; orotidine-5'-phosphate decarboxylase [EC:4.1.1.23]
K01593	0.231736	0.204649	0.0511621	0.0425555	0.0490924	0.0122731	0.0003	0.000608085	DDC, TDC; aromatic-L-amino-acid/L-tryptophan decarboxylase [EC:4.1.1.28 4.1.1.105]
K01595	0.727524	0.393953	0.0984884	2.02064	1.59213	0.398033	0.0026	0.00395853	ppc; phosphoenolpyruvate carboxylase [EC:4.1.1.31]
K01596	29.3602	8.57885	2.14471	117.876	20.4368	5.10921	<.0001	5.38599e-06	E4.1.1.32, pckA, PCK; phosphoenolpyruvate carboxykinase (GTP) [EC:4.1.1.32]
K01597	14.3478	7.03695	1.75924	8.89226	7.00987	1.75247	0.0317	0.0410843	MVD, mvaD; diphosphomevalonate decarboxylase [EC:4.1.1.33]
K01599	13.6422	6.06335	1.51584	24.0751	7.74793	1.93698	0.0008	0.00132396	hemE, UROD; uroporphyrinogen decarboxylase [EC:4.1.1.37]
K01601	0.275054	0.299417	0.0748542	0.603498	0.850665	0.212666	0.0288	0.0376366	rbcL; ribulose-bisphosphate carboxylase large chain [EC:4.1.1.39]
K01602	0.0237814	0.0250576	0.0062644	0.0925489	0.125408	0.0313519	0.0396	0.0500435	rbcS; ribulose-bisphosphate carboxylase small chain [EC:4.1.1.39]
K01607	234.798	37.8894	9.47235	30.3472	9.38696	2.34674	<.0001	5.38599e-06	pcaC; 4-carboxymuconolactone decarboxylase [EC:4.1.1.44]
K01608	0.353595	0.253816	0.0634541	0.30804	0.615997	0.153999	0.083	0.0978632	gcl; tartronate-semialdehyde synthase [EC:4.1.1.47]
K01609	55.5832	12.0373	3.00932	15.8266	3.48917	0.872293	<.0001	5.38599e-06	trpC; indole-3-glycerol phosphate synthase [EC:4.1.1.48]
K01610	240.922	45.3934	11.3484	277.611	24.9253	6.23132	0.0116	0.0163213	E4.1.1.49, pckA; phosphoenolpyruvate carboxykinase (ATP) [EC:4.1.1.49]
K01611	23.1654	5.61737	1.40434	9.11315	5.49031	1.37258	<.0001	2.64595e-05	speD, AMD1; S-adenosylmethionine decarboxylase [EC:4.1.1.50]
K01612	0.0007625	0.00305	0.0007625	0.260024	0.456068	0.114017	<.0001	5.38599e-06	bsdC; vanillate/4-hydroxybenzoate decarboxylase subunit C [EC:4.1.1.- 4.1.1.61]
K01613	202.827	36.7458	9.18646	122.982	21.5481	5.38703	<.0001	1.95324e-05	psd, PISD; phosphatidylserine decarboxylase [EC:4.1.1.65]
K01615	0.631904	0.337959	0.0844898	2.14845	1.14236	0.28559	<.0001	8.51833e-05	gcdA; glutaconyl-CoA decarboxylase subunit alpha [EC:7.2.4.5]
K01617	0.00872769	0.0143766	0.00359415	0.0526977	0.0532889	0.0133222	0.0032	0.00481398	dmpH, xylI, nahK; 2-oxo-3-hexenedioate decarboxylase [EC:4.1.1.77]
K01619	231.317	29.4862	7.37155	280.27	22.4181	5.60453	<.0001	0.000151881	deoC, DERA; deoxyribose-phosphate aldolase [EC:4.1.2.4]
K01620	156.09	32.254	8.0635	211.545	15.8929	3.97323	<.0001	3.52558e-05	ltaE; threonine aldolase [EC:4.1.2.48]
K01621	53.1699	13.9283	3.48207	54.0188	21.244	5.31101	0.8802	0.888078	xfp, xpk; xylulose-5-phosphate/fructose-6-phosphate phosphoketolase [EC:4.1.2.9 4.1.2.22]
K01622	6.31974	8.8462	2.21155	5.99676	2.13785	0.534463	0.0765	0.0905693	K01622; fructose 1,6-bisphosphate aldolase/phosphatase [EC:4.1.2.13 3.1.3.11]
K01623	16.281	6.25089	1.56272	5.9952	4.21356	1.05339	<.0001	0.000112898	ALDO; fructose-bisphosphate aldolase, class I [EC:4.1.2.13]
K01624	306.788	45.2621	11.3155	522.163	39.887	9.97175	<.0001	5.38599e-06	FBA, fbaA; fructose-bisphosphate aldolase, class II [EC:4.1.2.13]
K01625	117.543	28.5457	7.13642	198.448	25.5643	6.39108	<.0001	9.18181e-06	eda; 2-dehydro-3-deoxyphosphogluconate aldolase / (4S)-4-hydroxy-2-oxoglutarate aldolase [EC:4.1.2.14 4.1.3.42]
K01626	69.5203	17.2795	4.31988	161.819	18.6205	4.65514	<.0001	5.38599e-06	E2.5.1.54, aroF, aroG, aroH; 3-deoxy-7-phosphoheptulonate synthase [EC:2.5.1.54]
K01627	100.287	23.2727	5.81817	51.8761	22.6297	5.65741	<.0001	9.82894e-05	kdsA; 2-dehydro-3-deoxyphosphooctonate aldolase (KDO 8-P synthase) [EC:2.5.1.55]
K01628	29.8766	6.81641	1.7041	95.6528	16.8151	4.20377	<.0001	5.38599e-06	fucA; L-fuculose-phosphate aldolase [EC:4.1.2.17]
K01629	92.4976	25.9488	6.48719	90.5324	13.6685	3.41712	0.9699	0.971137	rhaD; rhamnulose-1-phosphate aldolase [EC:4.1.2.19]
K01630	0	0	0	0.14151	0.553669	0.138417	0.1508	0.170457	garL; 2-dehydro-3-deoxyglucarate aldolase [EC:4.1.2.20]
K01631	0.0494077	0.0284642	0.00711605	0.398882	0.633043	0.158261	<.0001	4.0984e-05	dgoA; 2-dehydro-3-deoxyphosphogalactonate aldolase [EC:4.1.2.21]
K01633	67.9992	17.4641	4.36603	52.3177	10.4801	2.62004	0.0104	0.0147395	folB; 7,8-dihydroneopterin aldolase/epimerase/oxygenase [EC:4.1.2.25 5.1.99.8 1.13.11.81]
K01634	9.19314	6.86917	1.71729	1.53389	2.11077	0.527692	0.0002	0.000408403	SGPL1, DPL1; sphinganine-1-phosphate aldolase [EC:4.1.2.27]
K01635	0.0293592	0.0517904	0.0129476	0.0357058	0.100379	0.0250947	0.6828	0.698318	lacD; tagatose 1,6-diphosphate aldolase [EC:4.1.2.40]
K01637	0.114364	0.104278	0.0260695	0.633849	0.691078	0.17277	<.0001	0.000112898	E4.1.3.1, aceA; isocitrate lyase [EC:4.1.3.1]
K01638	0.228446	0.18047	0.0451174	0.734797	1.48021	0.370052	0.2278	0.251576	aceB, glcB; malate synthase [EC:2.3.3.9]
K01639	18.7836	6.26381	1.56595	84.921	12.7533	3.18832	<.0001	5.38599e-06	E4.1.3.3, nanA, NPL; N-acetylneuraminate lyase [EC:4.1.3.3]
K01640	3.28888	1.16614	0.291535	3.25257	1.45856	0.364639	0.7063	0.720517	E4.1.3.4, HMGCL, hmgL; hydroxymethylglutaryl-CoA lyase [EC:4.1.3.4]
K01641	6.52376	7.0756	1.7689	5.68395	2.33588	0.58397	0.7345	0.747591	E2.3.3.10; hydroxymethylglutaryl-CoA synthase [EC:2.3.3.10]
K01643	39.3976	11.5364	2.8841	30.7614	9.05116	2.26279	0.0215	0.028733	citF; citrate lyase subunit alpha / citrate CoA-transferase [EC:2.8.3.10]
K01644	51.5418	16.4658	4.11645	46.8419	10.1525	2.53814	0.2744	0.300173	citE; citrate lyase subunit beta / citryl-CoA lyase [EC:4.1.3.34]
K01646	25.6618	6.57656	1.64414	22.7926	6.47507	1.61877	0.1748	0.195497	citD; citrate lyase subunit gamma (acyl carrier protein)
K01647	3.9388	4.52894	1.13224	13.0491	12.6556	3.1639	0.0005	0.00079122	CS, gltA; citrate synthase [EC:2.3.3.1]
K01649	137.853	30.1655	7.54139	119.787	22.0836	5.52089	0.0899	0.105432	leuA, IMS; 2-isopropylmalate synthase [EC:2.3.3.13]
K01652	175.532	37.0709	9.26773	170.193	29.7392	7.43481	0.9399	0.943884	E2.2.1.6L, ilvB, ilvG, ilvI; acetolactate synthase I/II/III large subunit [EC:2.2.1.6]
K01653	146.359	31.5014	7.87536	179.907	29.4576	7.36441	0.0053	0.00785151	E2.2.1.6S, ilvH, ilvN; acetolactate synthase I/III small subunit [EC:2.2.1.6]
K01654	4.51563	2.97107	0.742768	1.55483	1.37873	0.344683	0.0009	0.00150255	E2.5.1.56, neuB; N-acetylneuraminate synthase [EC:2.5.1.56]
K01655	0.0350316	0.0410385	0.0102596	0.001941	0.007764	0.001941	0.002	0.00310067	LYS21, LYS20; homocitrate synthase [EC:2.3.3.14]
K01657	117.435	28.6364	7.15909	15.9695	4.66785	1.16696	<.0001	5.38599e-06	trpE; anthranilate synthase component I [EC:4.1.3.27]
K01658	90.6584	22.8577	5.71441	13.5319	4.07029	1.01757	<.0001	5.38599e-06	trpG; anthranilate synthase component II [EC:4.1.3.27]
K01659	0.0155903	0.0179381	0.00448454	0.376105	0.676512	0.169128	0.0016	0.00257364	prpC; 2-methylcitrate synthase [EC:2.3.3.5]
K01661	42.6472	17.7243	4.43107	20.5174	16.8872	4.2218	0.0007	0.00116369	menB; naphthoate synthase [EC:4.1.3.36]
K01662	252.536	43.6661	10.9165	319.696	15.0186	3.75465	<.0001	3.52558e-05	dxs; 1-deoxy-D-xylulose-5-phosphate synthase [EC:2.2.1.7]
K01663	0.0168959	0.0377443	0.00943609	0	0	0	0.0035	0.00534752	HIS7; imidazole glycerol-phosphate synthase [EC:4.3.2.10]
K01664	0.0782893	0.136803	0.0342008	0.233404	0.642192	0.160548	0.3199	0.34199	pabA; para-aminobenzoate synthetase component II [EC:2.6.1.85]
K01665	0.00039875	0.001595	0.00039875	0.684689	1.1377	0.284424	<.0001	5.38599e-06	pabB; para-aminobenzoate synthetase component I [EC:2.6.1.85]
K01666	71.7149	18.384	4.59599	57.4381	12.8091	3.20227	0.0215	0.028733	mhpE; 4-hydroxy 2-oxovalerate aldolase [EC:4.1.3.39]
K01667	43.5777	12.8474	3.21185	41.0797	12.2025	3.05061	0.4287	0.450049	tnaA; tryptophanase [EC:4.1.99.1]
K01673	132.856	29.017	7.25425	31.4118	6.37033	1.59258	<.0001	5.38599e-06	cynT, can; carbonic anhydrase [EC:4.2.1.1]
K01674	0	0	0	0.107831	0.431325	0.107831	0.3173	0.339304	cah; carbonic anhydrase [EC:4.2.1.1]
K01676	104.288	29.7999	7.44999	66.1122	28.239	7.05976	0.001	0.00170309	E4.2.1.2A, fumA, fumB; fumarate hydratase, class I [EC:4.2.1.2]
K01677	42.078	9.36155	2.34039	126.713	19.3609	4.84022	<.0001	5.38599e-06	E4.2.1.2AA, fumA; fumarate hydratase subunit alpha [EC:4.2.1.2]
K01678	33.8986	7.29856	1.82464	107.719	14.3003	3.57507	<.0001	5.38599e-06	E4.2.1.2AB, fumB; fumarate hydratase subunit beta [EC:4.2.1.2]
K01679	23.39	8.03186	2.00796	42.7694	15.1601	3.79004	<.0001	0.000151881	E4.2.1.2B, fumC, FH; fumarate hydratase, class II [EC:4.2.1.2]
K01681	0.343661	0.240287	0.0600718	5.69904	6.88817	1.72204	<.0001	1.04859e-05	ACO, acnA; aconitate hydratase [EC:4.2.1.3]
K01682	1.35294	3.61364	0.903411	0.906337	3.14241	0.785603	0.0194	0.0261937	acnB; aconitate hydratase 2 / 2-methylisocitrate dehydratase [EC:4.2.1.3 4.2.1.99]
K01684	4.58159	1.53935	0.384837	44.843	13.3756	3.34389	<.0001	5.38599e-06	dgoD; galactonate dehydratase [EC:4.2.1.6]
K01685	79.2663	21.8069	5.45173	76.3145	14.4712	3.61779	0.6785	0.694077	uxaA; altronate hydrolase [EC:4.2.1.7]
K01686	130.272	26.7994	6.69984	213.509	24.999	6.24976	<.0001	5.38599e-06	uxuA; mannonate dehydratase [EC:4.2.1.8]
K01687	114.941	27.7925	6.94813	130.009	24.3099	6.07748	0.0899	0.105432	ilvD; dihydroxy-acid dehydratase [EC:4.2.1.9]
K01689	232.608	38.733	9.68324	315.349	23.6431	5.91077	<.0001	1.21479e-05	ENO, eno; enolase [EC:4.2.1.11]
K01690	0.284008	0.429501	0.107375	0.225877	0.460206	0.115052	0.407	0.428762	edd; phosphogluconate dehydratase [EC:4.2.1.12]
K01692	2.75019	1.38671	0.346677	10.184	4.66993	1.16748	<.0001	5.99662e-06	paaF, echA; enoyl-CoA hydratase [EC:4.2.1.17]
K01693	42.4323	10.711	2.67774	107.804	17.9075	4.47687	<.0001	5.38599e-06	hisB; imidazoleglycerol-phosphate dehydratase [EC:4.2.1.19]
K01695	125.457	27.8491	6.96228	34.915	9.14812	2.28703	<.0001	5.38599e-06	trpA; tryptophan synthase alpha chain [EC:4.2.1.20]
K01696	126.087	28.7627	7.19067	207.819	33.7296	8.4324	<.0001	1.66322e-05	trpB; tryptophan synthase beta chain [EC:4.2.1.20]
K01697	0.485851	0.359609	0.0899024	0.711166	0.475906	0.118977	0.0288	0.0376366	CBS; cystathionine beta-synthase [EC:4.2.1.22]
K01698	26.3283	7.88348	1.97087	27.7381	15.5876	3.89691	0.6785	0.694077	hemB, ALAD; porphobilinogen synthase [EC:4.2.1.24]
K01699	0.00327687	0.00530696	0.00132674	5.41376	2.09478	0.523696	<.0001	5.38599e-06	pduC; propanediol dehydratase large subunit [EC:4.2.1.28]
K01703	112.975	27.4523	6.86307	83.0708	16.5734	4.14336	0.0015	0.00246344	leuC, IPMI-L; 3-isopropylmalate/(R)-2-methylmalate dehydratase large subunit [EC:4.2.1.33 4.2.1.35]
K01704	109.203	23.1386	5.78466	74.0966	19.6462	4.91156	0.0003	0.000465495	leuD, IPMI-S; 3-isopropylmalate/(R)-2-methylmalate dehydratase small subunit [EC:4.2.1.33 4.2.1.35]
K01706	1.77137	0.72014	0.180035	2.86547	1.31645	0.329113	0.0159	0.021941	gudD; glucarate dehydratase [EC:4.2.1.40]
K01707	0.0230391	0.0149713	0.00374282	0.136616	0.159966	0.0399915	<.0001	0.000104655	kdgD; 5-dehydro-4-deoxyglucarate dehydratase [EC:4.2.1.41]
K01708	1.13022	0.59934	0.149835	1.41689	1.02131	0.255329	0.6242	0.642607	garD; galactarate dehydratase [EC:4.2.1.42]
K01709	60.067	14.9969	3.74924	37.2436	8.90407	2.22602	<.0001	4.0984e-05	rfbG; CDP-glucose 4,6-dehydratase [EC:4.2.1.45]
K01710	232.796	35.8504	8.9626	208.909	32.4898	8.12246	0.0704	0.0854759	rfbB, rmlB, rffG; dTDP-glucose 4,6-dehydratase [EC:4.2.1.46]
K01711	167.738	36.5914	9.14786	59.8163	17.6228	4.40571	<.0001	5.38599e-06	gmd, GMDS; GDPmannose 4,6-dehydratase [EC:4.2.1.47]
K01712	77.1092	23.4023	5.85058	53.4774	12.7513	3.18782	0.0014	0.00219027	hutU, UROC1; urocanate hydratase [EC:4.2.1.49]
K01713	79.098	20.2524	5.0631	1.59976	1.40123	0.350306	<.0001	5.38599e-06	pheC; cyclohexadienyl dehydratase [EC:4.2.1.51 4.2.1.91]
K01714	199.505	38.2693	9.56732	339.547	33.792	8.44801	<.0001	5.38599e-06	dapA; 4-hydroxy-tetrahydrodipicolinate synthase [EC:4.3.3.7]
K01715	85.0395	26.1726	6.54315	37.2242	8.09394	2.02348	<.0001	6.88093e-06	crt; enoyl-CoA hydratase [EC:4.2.1.17]
K01716	0.854428	1.42515	0.356287	0.840453	1.8386	0.459651	0.2913	0.316677	fabA; 3-hydroxyacyl-[acyl-carrier protein] dehydratase / trans-2-decenoyl-[acyl-carrier protein] isomerase [EC:4.2.1.59 5.3.3.14]
K01719	136.572	25.3566	6.33915	65.0417	23.7572	5.93931	<.0001	1.66322e-05	hemD, UROS; uroporphyrinogen-III synthase [EC:4.2.1.75]
K01720	0.0833635	0.112239	0.0280597	0.390067	0.577509	0.144377	0.0037	0.00558518	prpD; 2-methylcitrate dehydratase [EC:4.2.1.79]
K01721	0.0432186	0.0312768	0.0078192	0.246646	0.324318	0.0810795	0.001	0.00160016	nthA; nitrile hydratase subunit alpha [EC:4.2.1.84]
K01724	0.504291	0.295554	0.0738885	0.753148	0.566001	0.1415	0.3271	0.348789	PCBD, phhB; 4a-hydroxytetrahydrobiopterin dehydratase [EC:4.2.1.96]
K01725	0.193581	0.161186	0.0402966	0.533645	0.726162	0.181541	0.3089	0.334345	cynS; cyanate lyase [EC:4.2.1.104]
K01728	77.0055	30.3799	7.59498	7.26022	6.25818	1.56454	<.0001	5.99662e-06	pel; pectate lyase [EC:4.2.2.2]
K01729	17.0782	9.64463	2.41116	9.33865	9.23703	2.30926	0.002	0.0031379	algL; poly(beta-D-mannuronate) lyase [EC:4.2.2.3]
K01730	15.8934	7.40859	1.85215	9.18804	3.06901	0.767252	0.0093	0.0132941	ogl; oligogalacturonide lyase [EC:4.2.2.6]
K01733	157.257	29.6966	7.42415	227.115	21.3607	5.34017	<.0001	6.88093e-06	thrC; threonine synthase [EC:4.2.3.1]
K01734	43.7783	9.79884	2.44971	181.997	21.7596	5.43989	<.0001	5.38599e-06	mgsA; methylglyoxal synthase [EC:4.2.3.3]
K01735	203.343	40.1765	10.0441	261.48	14.0535	3.51337	<.0001	4.0984e-05	aroB; 3-dehydroquinate synthase [EC:4.2.3.4]
K01736	198.932	38.6575	9.66438	257.859	13.7647	3.44117	<.0001	0.000151881	aroC; chorismate synthase [EC:4.2.3.5]
K01737	115.342	17.2875	4.32189	64.2701	19.8414	4.96035	<.0001	9.18181e-06	queD, ptpS, PTS; 6-pyruvoyltetrahydropterin/6-carboxytetrahydropterin synthase [EC:4.2.3.12 4.1.2.50]
K01738	200.686	46.6371	11.6593	197.795	26.1044	6.52609	0.6511	0.668781	cysK; cysteine synthase [EC:2.5.1.47]
K01739	0.0174219	0.013799	0.00344974	0.194488	0.519297	0.129824	0.0096	0.0136978	metB; cystathionine gamma-synthase [EC:2.5.1.48]
K01740	312.522	75.5897	18.8974	270.659	21.725	5.43124	0.1317	0.151366	metY; O-acetylhomoserine (thiol)-lyase [EC:2.5.1.49]
K01744	65.9803	14.66	3.66501	52.9493	11.2209	2.80524	0.0195	0.0261937	aspA; aspartate ammonia-lyase [EC:4.3.1.1]
K01745	94.7422	29.5283	7.38208	57.4103	13.9425	3.48562	0.0001	0.000201456	hutH, HAL; histidine ammonia-lyase [EC:4.3.1.3]
K01749	24.9906	8.62291	2.15573	26.0512	12.4105	3.10263	0.9699	0.971137	hemC, HMBS; hydroxymethylbilane synthase [EC:2.5.1.61]
K01750	0.00946144	0.0130459	0.00326147	0.0557786	0.0593245	0.0148311	0.0039	0.00585606	E4.3.1.12, ocd; ornithine cyclodeaminase [EC:4.3.1.12]
K01752	111.524	26.1775	6.54438	290.165	18.2982	4.57456	<.0001	5.38599e-06	E4.3.1.17, sdaA, sdaB, tdcG; L-serine dehydratase [EC:4.3.1.17]
K01753	6.67308	1.43738	0.359345	21.2658	4.96083	1.24021	<.0001	5.38599e-06	dsdA; D-serine dehydratase [EC:4.3.1.18]
K01754	57.7798	15.1443	3.78607	140.854	18.855	4.71375	<.0001	5.38599e-06	E4.3.1.19, ilvA, tdcB; threonine dehydratase [EC:4.3.1.19]
K01755	188.872	38.6373	9.65932	295.096	15.588	3.89701	<.0001	5.99662e-06	argH, ASL; argininosuccinate lyase [EC:4.3.2.1]
K01756	200.347	41.1518	10.288	288.745	22.7094	5.67736	<.0001	1.04859e-05	purB, ADSL; adenylosuccinate lyase [EC:4.3.2.2]
K01758	2.73184	1.78522	0.446304	0.744062	0.601587	0.150397	0.0005	0.000904344	CTH; cystathionine gamma-lyase [EC:4.4.1.1]
K01759	11.5415	3.18265	0.795663	35.5817	5.61934	1.40483	<.0001	5.38599e-06	GLO1, gloA; lactoylglutathione lyase [EC:4.4.1.5]
K01760	52.883	13.9292	3.48229	10.6172	3.71785	0.929461	<.0001	5.38599e-06	metC; cysteine-S-conjugate beta-lyase [EC:4.4.1.13]
K01761	4.24028	1.19793	0.299482	11.3876	5.4081	1.35203	<.0001	1.42253e-05	E4.4.1.11; methionine-gamma-lyase [EC:4.4.1.11]
K01768	123.813	44.9527	11.2382	38.0633	18.0341	4.50852	<.0001	9.18181e-06	E4.6.1.1; adenylate cyclase [EC:4.6.1.1]
K01770	105.642	24.0625	6.01563	151.599	11.4589	2.86472	<.0001	1.66322e-05	ispF; 2-C-methyl-D-erythritol 2,4-cyclodiphosphate synthase [EC:4.6.1.12]
K01771	88.5193	19.8711	4.96778	31.1208	15.0674	3.76684	<.0001	7.9474e-06	plc; 1-phosphatidylinositol phosphodiesterase [EC:4.6.1.13]
K01772	1.04265	0.937201	0.2343	3.15044	1.48413	0.371032	<.0001	4.0984e-05	hemH, FECH; protoporphyrin/coproporphyrin ferrochelatase [EC:4.99.1.1 4.99.1.9]
K01775	191.566	26.1531	6.53828	389.471	41.3651	10.3413	<.0001	5.38599e-06	alr; alanine racemase [EC:5.1.1.1]
K01776	180.673	36.4253	9.10633	269.633	20.6913	5.17282	<.0001	9.18181e-06	murI; glutamate racemase [EC:5.1.1.3]
K01777	0.425085	0.574714	0.143678	1.15539	1.18203	0.295508	0.0142	0.0198747	prdF; proline racemase [EC:5.1.1.4]
K01778	199.494	32.2335	8.05837	344.265	23.6094	5.90235	<.0001	5.38599e-06	dapF; diaminopimelate epimerase [EC:5.1.1.7]
K01779	52.5267	15.6803	3.92007	69.7252	12.5885	3.14711	0.0018	0.00278261	racD; aspartate racemase [EC:5.1.1.13]
K01781	0.0304408	0.0318398	0.00795994	0.107168	0.119143	0.0297857	0.0049	0.00737725	mdlA; mandelate racemase [EC:5.1.2.2]
K01782	0.0792058	0.0288432	0.00721081	0.525796	0.596915	0.149229	<.0001	1.66322e-05	fadJ; 3-hydroxyacyl-CoA dehydrogenase / enoyl-CoA hydratase / 3-hydroxybutyryl-CoA epimerase [EC:1.1.1.35 4.2.1.17 5.1.2.3]
K01783	189.266	36.0097	9.00243	284.767	16.046	4.0115	<.0001	5.38599e-06	rpe, RPE; ribulose-phosphate 3-epimerase [EC:5.1.3.1]
K01784	286.206	33.3538	8.33844	402.833	34.3094	8.57735	<.0001	5.38599e-06	galE, GALE; UDP-glucose 4-epimerase [EC:5.1.3.2]
K01785	379.39	70.2566	17.5641	421.841	24.5321	6.13302	0.05	0.0620713	galM, GALM; aldose 1-epimerase [EC:5.1.3.3]
K01787	28.8683	7.90553	1.97638	102.283	21.3869	5.34673	<.0001	5.38599e-06	RENBP; N-acylglucosamine 2-epimerase [EC:5.1.3.8]
K01788	6.88826	2.89343	0.723356	24.4472	8.23332	2.05833	<.0001	5.38599e-06	nanE; N-acylglucosamine-6-phosphate 2-epimerase [EC:5.1.3.9]
K01790	225.735	29.864	7.46601	168.99	23.7294	5.93236	<.0001	3.0485e-05	rfbC, rmlC; dTDP-4-dehydrorhamnose 3,5-epimerase [EC:5.1.3.13]
K01791	132.182	17.7484	4.4371	140.622	18.6098	4.65244	0.451	0.472614	wecB; UDP-N-acetylglucosamine 2-epimerase (non-hydrolysing) [EC:5.1.3.14]
K01792	0.757811	0.554267	0.138567	9.78435	9.82767	2.45692	<.0001	4.78987e-05	E5.1.3.15; glucose-6-phosphate 1-epimerase [EC:5.1.3.15]
K01793	3.69412	2.58207	0.645516	2.09142	1.31046	0.327616	0.05	0.0620713	GLCE; heparosan-N-sulfate-glucuronate 5-epimerase [EC:5.1.3.17]
K01796	7.51975	3.07185	0.767962	6.19153	1.67812	0.419531	0.1871	0.208371	E5.1.99.4, AMACR, mcr; alpha-methylacyl-CoA racemase [EC:5.1.99.4]
K01798	104.155	25.4258	6.35646	44.051	19.682	4.92051	<.0001	2.27944e-05	alr-murF; Alr-MurF fusion protein [EC:5.1.1.1 6.3.2.10]
K01799	0.926077	0.360876	0.0902191	3.75917	1.6445	0.411126	<.0001	1.66322e-05	nicE, maiA; maleate isomerase [EC:5.2.1.1]
K01800	0.0492308	0.0381759	0.00954398	0.29476	0.328846	0.0822116	0.0003	0.000569959	maiA, GSTZ1; maleylacetoacetate isomerase [EC:5.2.1.2]
K01801	0.0232001	0.0225302	0.00563254	0.163181	0.140141	0.0350353	<.0001	4.8936e-05	nagL; maleylpyruvate isomerase [EC:5.2.1.4]
K01803	221.241	32.085	8.02125	288.849	16.3395	4.08487	<.0001	9.18181e-06	TPI, tpiA; triosephosphate isomerase (TIM) [EC:5.3.1.1]
K01804	111.015	30.6642	7.66606	110.804	20.4404	5.11009	0.8802	0.888078	araA; L-arabinose isomerase [EC:5.3.1.4]
K01805	106.432	27.5288	6.88221	98.824	19.6134	4.90334	0.1871	0.208371	xylA; xylose isomerase [EC:5.3.1.5]
K01807	24.017	9.01861	2.25465	14.6186	7.14598	1.7865	0.0026	0.00395853	rpiA; ribose 5-phosphate isomerase A [EC:5.3.1.6]
K01808	179.418	30.2643	7.56607	241.317	18.2659	4.56647	<.0001	1.42253e-05	rpiB; ribose 5-phosphate isomerase B [EC:5.3.1.6]
K01809	270.086	51.5686	12.8922	215.725	24.1441	6.03603	0.0006	0.00102927	manA, MPI; mannose-6-phosphate isomerase [EC:5.3.1.8]
K01810	237.145	43.0728	10.7682	331.88	18.1657	4.54141	<.0001	5.99662e-06	GPI, pgi; glucose-6-phosphate isomerase [EC:5.3.1.9]
K01812	151.482	31.9453	7.98632	246.705	23.1931	5.79827	<.0001	5.38599e-06	uxaC; glucuronate isomerase [EC:5.3.1.12]
K01813	72.1179	23.6571	5.91427	120.803	20.8309	5.20773	<.0001	9.82894e-05	rhaA; L-rhamnose isomerase [EC:5.3.1.14]
K01814	102.985	21.809	5.45226	130.715	14.533	3.63325	0.0005	0.000904344	hisA; phosphoribosylformimino-5-aminoimidazole carboxamide ribotide isomerase [EC:5.3.1.16]
K01815	110.356	34.0726	8.51816	67.2624	9.26853	2.31713	0.0001	0.00026839	kduI; 4-deoxy-L-threo-5-hexosulose-uronate ketol-isomerase [EC:5.3.1.17]
K01816	2.87446	1.22694	0.306736	21.707	6.17458	1.54364	<.0001	5.38599e-06	hyi, gip; hydroxypyruvate isomerase [EC:5.3.1.22]
K01817	77.4838	22.3818	5.59546	15.4349	4.27894	1.06974	<.0001	5.38599e-06	trpF; phosphoribosylanthranilate isomerase [EC:5.3.1.24]
K01818	47.3826	13.7004	3.42511	149.5	18.3534	4.58834	<.0001	5.38599e-06	fucI; L-fucose/D-arabinose isomerase [EC:5.3.1.25 5.3.1.3]
K01819	0.313625	0.438235	0.109559	0.352827	0.29689	0.0742225	0.3089	0.334345	E5.3.1.26, lacA, lacB; galactose-6-phosphate isomerase [EC:5.3.1.26]
K01820	0.129091	0.0608914	0.0152229	0.619017	0.619249	0.154812	0.0001	0.000201456	rhaA; L-rhamnose isomerase / sugar isomerase [EC:5.3.1.14 5.3.1.-]
K01821	45.8545	16.813	4.20325	21.5148	5.12556	1.28139	<.0001	9.18181e-06	praC, xylH; 4-oxalocrotonate tautomerase [EC:5.3.2.6]
K01823	137.501	28.4382	7.10956	133.016	19.4082	4.85204	0.5977	0.617294	idi, IDI; isopentenyl-diphosphate Delta-isomerase [EC:5.3.3.2]
K01825	0.00283313	0.00465571	0.00116393	0.197405	0.754572	0.188643	0.4233	0.445537	fadB; 3-hydroxyacyl-CoA dehydrogenase / enoyl-CoA hydratase / 3-hydroxybutyryl-CoA epimerase / enoyl-CoA isomerase [EC:1.1.1.35 4.2.1.17 5.1.2.3 5.3.3.8]
K01826	0.0299854	0.036106	0.0090265	0.196844	0.30756	0.07689	0.0062	0.00918179	hpaF, hpcD; 5-carboxymethyl-2-hydroxymuconate isomerase [EC:5.3.3.10]
K01834	101.835	23.4316	5.8579	14.6737	7.39622	1.84905	<.0001	5.38599e-06	PGAM, gpmA; 2,3-bisphosphoglycerate-dependent phosphoglycerate mutase [EC:5.4.2.11]
K01835	237.705	36.9416	9.2354	276.201	27.289	6.82225	0.0053	0.00785151	pgm; phosphoglucomutase [EC:5.4.2.2]
K01836	0.259266	0.28699	0.0717475	0	0	0	<.0001	9.87573e-06	PGM3; phosphoacetylglucosamine mutase [EC:5.4.2.3]
K01838	22.5555	4.03608	1.00902	48.7012	10.4964	2.6241	<.0001	5.38599e-06	pgmB; beta-phosphoglucomutase [EC:5.4.2.6]
K01839	84.6251	11.1372	2.78431	198.428	26.475	6.61875	<.0001	5.38599e-06	deoB; phosphopentomutase [EC:5.4.2.7]
K01840	5.98881	2.64633	0.661583	2.43981	1.64229	0.410572	0.0001	0.00026839	manB; phosphomannomutase [EC:5.4.2.8]
K01841	0.187122	0.186797	0.0466992	3.25663	7.2914	1.82285	0.1051	0.122388	pepM; phosphoenolpyruvate phosphomutase [EC:5.4.2.9]
K01843	43.075	11.3023	2.82557	26.4322	7.02431	1.75608	0.0001	0.000201456	kamA; lysine 2,3-aminomutase [EC:5.4.3.2]
K01844	37.3513	12.2405	3.06012	17.2132	5.92376	1.48094	<.0001	9.82894e-05	kamD; beta-lysine 5,6-aminomutase alpha subunit [EC:5.4.3.3]
K01845	35.9459	11.004	2.75101	73.2861	20.3906	5.09766	<.0001	2.27944e-05	hemL; glutamate-1-semialdehyde 2,1-aminomutase [EC:5.4.3.8]
K01846	1.51409	1.27288	0.318219	22.5124	5.31334	1.32834	<.0001	5.38599e-06	glmS, mutS, mamA; methylaspartate mutase sigma subunit [EC:5.4.99.1]
K01847	95.7451	26.025	6.50626	45.0819	17.4637	4.36594	<.0001	5.56604e-05	MUT; methylmalonyl-CoA mutase [EC:5.4.99.2]
K01848	6.56571	2.71016	0.677539	3.28834	1.59229	0.398072	0.0004	0.000691974	E5.4.99.2A, mcmA1; methylmalonyl-CoA mutase, N-terminal domain [EC:5.4.99.2]
K01849	5.19465	2.14127	0.535317	2.51717	1.08691	0.271728	0.0002	0.000408403	E5.4.99.2B, mcmA2; methylmalonyl-CoA mutase, C-terminal domain [EC:5.4.99.2]
K01854	223.592	32.9685	8.24213	201.366	34.4397	8.60993	0.05	0.0620713	glf; UDP-galactopyranose mutase [EC:5.4.99.9]
K01856	0.0503356	0.030502	0.0076255	0.190506	0.200796	0.050199	0.0006	0.00102927	catB; muconate cycloisomerase [EC:5.5.1.1]
K01857	1.62485	0.956975	0.239244	0.909765	0.581279	0.14532	0.0288	0.0376366	pcaB; 3-carboxy-cis,cis-muconate cycloisomerase [EC:5.5.1.2]
K01858	85.9742	19.3617	4.84042	17.0237	7.62511	1.90628	<.0001	5.38599e-06	INO1, ISYNA1; myo-inositol-1-phosphate synthase [EC:5.5.1.4]
K01865	0.0281762	0.0280106	0.00700265	0.0664324	0.0762719	0.019068	0.1406	0.161431	hab; (hydroxyamino)benzene mutase [EC:5.4.4.1]
K01866	308.895	39.6128	9.90319	430.954	22.5071	5.62677	<.0001	5.38599e-06	YARS, tyrS; tyrosyl-tRNA synthetase [EC:6.1.1.1]
K01867	282.305	39.14	9.785	402.407	27.0269	6.75672	<.0001	5.38599e-06	WARS, trpS; tryptophanyl-tRNA synthetase [EC:6.1.1.2]
K01868	360.48	36.4845	9.12113	542.097	25.0644	6.2661	<.0001	5.38599e-06	TARS, thrS; threonyl-tRNA synthetase [EC:6.1.1.3]
K01869	317.115	42.5888	10.6472	404.815	29.1525	7.28812	<.0001	9.18181e-06	LARS, leuS; leucyl-tRNA synthetase [EC:6.1.1.4]
K01870	291.951	35.739	8.93475	360.763	32.4079	8.10198	<.0001	9.82894e-05	IARS, ileS; isoleucyl-tRNA synthetase [EC:6.1.1.5]
K01872	351.402	43.2189	10.8047	536.39	26.9732	6.74329	<.0001	5.38599e-06	AARS, alaS; alanyl-tRNA synthetase [EC:6.1.1.7]
K01873	280.293	41.0969	10.2742	351.814	30.0147	7.50369	<.0001	0.00013093	VARS, valS; valyl-tRNA synthetase [EC:6.1.1.9]
K01874	372.02	45.1153	11.2788	545.123	34.1972	8.5493	<.0001	5.38599e-06	MARS, metG; methionyl-tRNA synthetase [EC:6.1.1.10]
K01875	329.295	32.2372	8.0593	495.845	27.0499	6.76247	<.0001	5.38599e-06	SARS, serS; seryl-tRNA synthetase [EC:6.1.1.11]
K01876	306.268	53.56	13.39	490.018	53.744	13.436	<.0001	5.99662e-06	aspS; aspartyl-tRNA synthetase [EC:6.1.1.12]
K01878	7.8417	4.22803	1.05701	9.12929	6.32442	1.58111	0.5718	0.591757	glyQ; glycyl-tRNA synthetase alpha chain [EC:6.1.1.14]
K01879	8.79684	5.25036	1.31259	11.8222	7.88805	1.97201	0.1051	0.122388	glyS; glycyl-tRNA synthetase beta chain [EC:6.1.1.14]
K01880	319.209	36.8986	9.22464	437.966	29.5725	7.39314	<.0001	5.38599e-06	GARS, glyS1; glycyl-tRNA synthetase [EC:6.1.1.14]
K01881	306.66	39.6322	9.90806	420.177	31.7089	7.92723	<.0001	5.38599e-06	PARS, proS; prolyl-tRNA synthetase [EC:6.1.1.15]
K01883	277.074	33.8615	8.46537	345.206	24.7169	6.17923	<.0001	2.64595e-05	CARS, cysS; cysteinyl-tRNA synthetase [EC:6.1.1.16]
K01884	6.83582	6.17324	1.54331	2.63156	1.76101	0.440252	0.0143	0.0199165	cysS1; cysteinyl-tRNA synthetase, unknown class [EC:6.1.1.16]
K01885	265.297	46.8614	11.7154	335.482	28.4537	7.11343	<.0001	9.82894e-05	EARS, gltX; glutamyl-tRNA synthetase [EC:6.1.1.17]
K01886	191.987	35.9144	8.97861	236.775	11.5142	2.87855	0.0003	0.000531645	QARS, glnS; glutaminyl-tRNA synthetase [EC:6.1.1.18]
K01887	339.905	33.393	8.34824	494.61	26.1003	6.52508	<.0001	5.38599e-06	RARS, argS; arginyl-tRNA synthetase [EC:6.1.1.19]
K01889	291.73	34.6634	8.66585	383.604	22.6514	5.66285	<.0001	5.38599e-06	FARSA, pheS; phenylalanyl-tRNA synthetase alpha chain [EC:6.1.1.20]
K01890	343.141	37.6719	9.41797	483.116	28.6317	7.15793	<.0001	5.38599e-06	FARSB, pheT; phenylalanyl-tRNA synthetase beta chain [EC:6.1.1.20]
K01892	269.816	35.7156	8.92891	338.49	29.5473	7.38682	<.0001	4.78987e-05	HARS, hisS; histidyl-tRNA synthetase [EC:6.1.1.21]
K01893	246.547	33.5118	8.37795	323.329	19.4319	4.85798	<.0001	5.99662e-06	NARS, asnS; asparaginyl-tRNA synthetase [EC:6.1.1.22]
K01895	0.202831	0.103643	0.0259107	1.0382	0.927046	0.231762	<.0001	2.27944e-05	ACSS1_2, acs; acetyl-CoA synthetase [EC:6.2.1.1]
K01897	172.244	26.0053	6.50133	119.847	28.303	7.07576	<.0001	9.82894e-05	ACSL, fadD; long-chain acyl-CoA synthetase [EC:6.2.1.3]
K01900	0	0	0	0.575085	1.98515	0.496287	0.1508	0.170457	LSC2; succinyl-CoA synthetase beta subunit [EC:6.2.1.4 6.2.1.5]
K01902	12.8541	6.20731	1.55183	8.86827	4.11594	1.02899	0.0195	0.0261937	sucD; succinyl-CoA synthetase alpha subunit [EC:6.2.1.5]
K01903	8.00934	4.54615	1.13654	1.99349	2.82635	0.706588	<.0001	4.78987e-05	sucC; succinyl-CoA synthetase beta subunit [EC:6.2.1.5]
K01906	3.71601	2.04784	0.511961	1.73537	1.69622	0.424056	0.0014	0.00219027	bioW; 6-carboxyhexanoate--CoA ligase [EC:6.2.1.14]
K01907	1.39757	0.892713	0.223178	0.570978	0.657624	0.164406	0.001	0.00170309	AACS, acsA; acetoacetyl-CoA synthetase [EC:6.2.1.16]
K01908	0.176581	0.215297	0.0538242	0.421452	0.653259	0.163315	0.2	0.222382	ACSS3, prpE; propionyl-CoA synthetase [EC:6.2.1.17]
K01910	42.5025	11.4714	2.86784	37.1075	8.33587	2.08397	0.0765	0.0905693	citC; [citrate (pro-3S)-lyase] ligase [EC:6.2.1.22]
K01911	0	0	0	0.252455	0.517016	0.129254	<.0001	5.38599e-06	menE; O-succinylbenzoic acid---CoA ligase [EC:6.2.1.26]
K01912	275.17	59.2098	14.8024	240.088	30.7123	7.67807	0.0973	0.113712	paaK; phenylacetate-CoA ligase [EC:6.2.1.30]
K01914	164.658	16.1217	4.03042	232.167	18.5054	4.62636	<.0001	5.38599e-06	asnA; aspartate--ammonia ligase [EC:6.3.1.1]
K01915	559.57	104.234	26.0584	1062.17	69.8593	17.4648	<.0001	5.38599e-06	glnA, GLUL; glutamine synthetase [EC:6.3.1.2]
K01916	5.54817	7.94984	1.98746	3.46878	2.24589	0.561473	0.5217	0.542654	nadE; NAD+ synthase [EC:6.3.1.5]
K01918	93.6087	26.2691	6.56729	66.0494	28.9131	7.22828	0.0129	0.0180314	panC; pantoate--beta-alanine ligase [EC:6.3.2.1]
K01919	37.6639	26.4938	6.62345	32.4928	7.81827	1.95457	0.5977	0.617294	gshA; glutamate--cysteine ligase [EC:6.3.2.2]
K01920	0.453478	0.528931	0.132233	5.45663	5.70905	1.42726	<.0001	2.27944e-05	gshB; glutathione synthase [EC:6.3.2.3]
K01921	295.83	54.3873	13.5968	424.172	32.4014	8.10034	<.0001	5.99662e-06	ddl; D-alanine-D-alanine ligase [EC:6.3.2.4]
K01923	210.672	41.6697	10.4174	301.999	20.1307	5.03266	<.0001	1.04859e-05	purC; phosphoribosylaminoimidazole-succinocarboxamide synthase [EC:6.3.2.6]
K01924	244.78	47.5157	11.8789	306.558	27.2193	6.80484	0.0003	0.000608085	murC; UDP-N-acetylmuramate--alanine ligase [EC:6.3.2.8]
K01925	181.08	39.3207	9.83019	267.199	26.2448	6.5612	<.0001	7.9474e-06	murD; UDP-N-acetylmuramoylalanine--D-glutamate ligase [EC:6.3.2.9]
K01928	253.472	46.6818	11.6704	340.436	40.1607	10.0402	<.0001	8.51833e-05	murE; UDP-N-acetylmuramoyl-L-alanyl-D-glutamate--2,6-diaminopimelate ligase [EC:6.3.2.13]
K01929	202.598	43.1368	10.7842	221.422	14.9072	3.72679	0.2582	0.283517	murF; UDP-N-acetylmuramoyl-tripeptide--D-alanyl-D-alanine ligase [EC:6.3.2.10]
K01933	188.582	39.0799	9.76996	297.808	16.3695	4.09238	<.0001	5.99662e-06	purM; phosphoribosylformylglycinamidine cyclo-ligase [EC:6.3.3.1]
K01934	145.477	29.0602	7.26506	195.851	12.7737	3.19344	<.0001	2.64595e-05	MTHFS; 5-formyltetrahydrofolate cyclo-ligase [EC:6.3.3.2]
K01935	12.0198	4.96369	1.24092	15.7043	14.2409	3.56023	0.7919	0.804455	bioD; dethiobiotin synthetase [EC:6.3.3.3]
K01937	277.958	43.9387	10.9847	455.749	26.0212	6.5053	<.0001	5.38599e-06	pyrG, CTPS; CTP synthase [EC:6.3.4.2]
K01938	53.325	13.5944	3.39859	127.627	26.9784	6.74459	<.0001	5.38599e-06	fhs; formate--tetrahydrofolate ligase [EC:6.3.4.3]
K01939	260.362	50.3935	12.5984	371.752	24.7801	6.19502	<.0001	6.88093e-06	purA, ADSS; adenylosuccinate synthase [EC:6.3.4.4]
K01940	186.172	35.4155	8.85388	303.876	15.5819	3.89547	<.0001	5.99662e-06	argG, ASS1; argininosuccinate synthase [EC:6.3.4.5]
K01941	0.483627	0.408851	0.102213	0.217612	0.269175	0.0672936	0.0237	0.03148	E6.3.4.6; urea carboxylase [EC:6.3.4.6]
K01945	210.165	41.8594	10.4648	322.703	14.2791	3.56977	<.0001	5.99662e-06	purD; phosphoribosylamine---glycine ligase [EC:6.3.4.13]
K01950	86.7385	28.6871	7.17177	84.1509	16.66	4.165	1	1	E6.3.5.1, NADSYN1, QNS1, nadE; NAD+ synthase (glutamine-hydrolysing) [EC:6.3.5.1]
K01951	357.337	65.0623	16.2656	727.584	47.4194	11.8549	<.0001	5.38599e-06	guaA, GMPS; GMP synthase (glutamine-hydrolysing) [EC:6.3.5.2]
K01952	172.89	47.8156	11.9539	206.607	17.6137	4.40343	0.0176	0.0238336	PFAS, purL; phosphoribosylformylglycinamidine synthase [EC:6.3.5.3]
K01953	274.026	55.1806	13.7951	499.022	64.2179	16.0545	<.0001	5.38599e-06	asnB, ASNS; asparagine synthase (glutamine-hydrolysing) [EC:6.3.5.4]
K01955	144.409	34.579	8.64475	278.223	24.2357	6.05892	<.0001	5.38599e-06	carB, CPA2; carbamoyl-phosphate synthase large subunit [EC:6.3.5.5]
K01956	129.776	35.3208	8.83019	220.083	14.9069	3.72673	<.0001	5.99662e-06	carA, CPA1; carbamoyl-phosphate synthase small subunit [EC:6.3.5.5]
K01958	7.34131	1.99419	0.498548	12.8228	3.03347	0.758367	<.0001	3.0485e-05	PC, pyc; pyruvate carboxylase [EC:6.4.1.1]
K01960	5.59929	8.10428	2.02607	5.41246	2.05608	0.514019	0.0546	0.0671479	pycB; pyruvate carboxylase subunit B [EC:6.4.1.1]
K01961	24.0181	10.2901	2.57251	24.769	11.4895	2.87236	0.8211	0.832007	accC; acetyl-CoA carboxylase, biotin carboxylase subunit [EC:6.4.1.2 6.3.4.14]
K01962	11.2628	6.42065	1.60516	16.666	4.62797	1.15699	0.0018	0.00278261	accA; acetyl-CoA carboxylase carboxyl transferase subunit alpha [EC:6.4.1.2 2.1.3.15]
K01963	19.7715	9.69588	2.42397	27.4731	10.9944	2.7486	0.0033	0.00499536	accD; acetyl-CoA carboxylase carboxyl transferase subunit beta [EC:6.4.1.2 2.1.3.15]
K01965	0.155809	0.508716	0.127179	0.0994054	0.120534	0.0301335	0.0546	0.0671479	PCCA, pccA; propionyl-CoA carboxylase alpha chain [EC:6.4.1.3]
K01966	106.477	27.1025	6.77562	58.1747	16.2548	4.06371	<.0001	6.40768e-05	PCCB, pccB; propionyl-CoA carboxylase beta chain [EC:6.4.1.3 2.1.3.15]
K01968	0.018934	0.0124567	0.00311418	0.0909049	0.0995424	0.0248856	<.0001	0.000175964	E6.4.1.4A; 3-methylcrotonyl-CoA carboxylase alpha subunit [EC:6.4.1.4]
K01969	10.0542	7.08985	1.77246	5.85269	4.99204	1.24801	0.0418	0.0526727	E6.4.1.4B; 3-methylcrotonyl-CoA carboxylase beta subunit [EC:6.4.1.4]
K01971	0.410214	0.458965	0.114741	17.4083	7.47336	1.86834	<.0001	5.38599e-06	ligD; bifunctional non-homologous end joining protein LigD [EC:6.5.1.1]
K01972	354.024	63.6423	15.9106	531.342	29.219	7.30475	<.0001	5.99662e-06	E6.5.1.2, ligA, ligB; DNA ligase (NAD+) [EC:6.5.1.2]
K01991	347.015	72.5533	18.1383	112.784	36.842	9.21051	<.0001	6.88093e-06	wza, gfcE; polysaccharide biosynthesis/export protein
K01995	65.3429	14.5603	3.64007	160.956	27.9516	6.98789	<.0001	5.38599e-06	livG; branched-chain amino acid transport system ATP-binding protein
K01996	60.8084	13.7123	3.42807	143.302	26.2421	6.56052	<.0001	5.38599e-06	livF; branched-chain amino acid transport system ATP-binding protein
K01997	76.242	17.7422	4.43554	179.701	32.0078	8.00196	<.0001	5.38599e-06	livH; branched-chain amino acid transport system permease protein
K01998	67.5913	16.2471	4.06178	146.456	28.0823	7.02057	<.0001	5.38599e-06	livM; branched-chain amino acid transport system permease protein
K01999	74.4674	17.4982	4.37455	159.083	32.3603	8.09008	<.0001	5.99662e-06	livK; branched-chain amino acid transport system substrate-binding protein
K02000	0.101944	0.0709766	0.0177442	0.538421	0.904297	0.226074	0.0648	0.0790027	proV; glycine betaine/proline transport system ATP-binding protein [EC:7.6.2.9]
K02001	0.112163	0.0905948	0.0226487	0.462466	0.70143	0.175357	0.1051	0.122388	proW; glycine betaine/proline transport system permease protein
K02002	0.226237	0.139971	0.0349928	0.508343	0.704598	0.176149	0.2	0.222382	proX; glycine betaine/proline transport system substrate-binding protein
K02006	11.618	13.1722	3.29304	12.9551	5.6871	1.42178	0.0317	0.0410843	cbiO; cobalt/nickel transport system ATP-binding protein
K02007	20.6267	13.4801	3.37003	18.0964	6.92009	1.73002	0.7063	0.720517	cbiM; cobalt/nickel transport system permease protein
K02008	18.2363	16.6815	4.17037	17.3903	6.20812	1.55203	0.2913	0.316677	cbiQ; cobalt/nickel transport system permease protein
K02009	5.26564	7.16096	1.79024	5.43232	1.89966	0.474914	0.0458	0.0572048	cbiN; cobalt/nickel transport protein
K02010	28.3807	8.40443	2.10111	32.4156	8.55306	2.13827	0.1051	0.122388	afuC, fbpC; iron(III) transport system ATP-binding protein [EC:7.2.2.7]
K02011	56.007	15.1837	3.79591	66.3108	16.7314	4.18286	0.0458	0.0572048	afuB, fbpB; iron(III) transport system permease protein
K02012	54.5321	14.1016	3.52541	43.8187	11.4799	2.86998	0.0129	0.0180314	afuA, fbpA; iron(III) transport system substrate-binding protein
K02017	0.329023	0.307579	0.0768949	0.217286	0.593603	0.148401	0.0058	0.00867321	modC; molybdate transport system ATP-binding protein [EC:7.3.2.5]
K02018	16.1634	7.80422	1.95106	13.5681	4.03226	1.00807	0.4739	0.495769	modB; molybdate transport system permease protein
K02020	24.3583	9.62986	2.40746	21.9451	5.17892	1.29473	0.7345	0.747591	modA; molybdate transport system substrate-binding protein
K02031	99.1691	20.5744	5.14359	206.585	36.4034	9.10084	<.0001	5.38599e-06	ABC.PE.A; peptide/nickel transport system ATP-binding protein
K02032	73.7438	16.4222	4.10554	212.409	36.6009	9.15023	<.0001	5.38599e-06	ABC.PE.A1; peptide/nickel transport system ATP-binding protein
K02033	153.54	31.8702	7.96754	234.737	40.7375	10.1844	<.0001	4.78987e-05	ABC.PE.P; peptide/nickel transport system permease protein
K02034	125.296	27.6191	6.90477	191.119	34.2502	8.56254	<.0001	6.40768e-05	ABC.PE.P1; peptide/nickel transport system permease protein
K02035	119.954	26.5628	6.64071	150.607	23.4763	5.86908	0.0014	0.00219027	ABC.PE.S; peptide/nickel transport system substrate-binding protein
K02036	28.0806	7.97151	1.99288	209.435	25.9604	6.4901	<.0001	5.38599e-06	pstB; phosphate transport system ATP-binding protein [EC:7.3.2.1]
K02037	23.2851	8.85649	2.21412	172.122	24.118	6.02949	<.0001	5.38599e-06	pstC; phosphate transport system permease protein
K02038	18.2624	7.58142	1.89536	170.01	23.7697	5.94243	<.0001	5.38599e-06	pstA; phosphate transport system permease protein
K02040	174.178	32.8963	8.22407	389.297	31.1327	7.78316	<.0001	5.38599e-06	pstS; phosphate transport system substrate-binding protein
K02041	6.38371	2.41671	0.604177	8.53925	3.2778	0.819449	0.083	0.0978632	phnC; phosphonate transport system ATP-binding protein [EC:7.3.2.2]
K02042	13.0665	4.62824	1.15706	18.8329	7.1058	1.77645	0.0143	0.0199165	phnE; phosphonate transport system permease protein
K02044	6.01207	1.99422	0.498556	3.3619	1.56822	0.392054	0.0003	0.000531645	phnD; phosphonate transport system substrate-binding protein
K02045	9.07958	6.42503	1.60626	1.50441	0.757004	0.189251	<.0001	5.38599e-06	cysA; sulfate/thiosulfate transport system ATP-binding protein [EC:7.3.2.3]
K02046	6.30305	5.22811	1.30703	1.7367	0.826658	0.206665	<.0001	9.18181e-06	cysU; sulfate/thiosulfate transport system permease protein
K02047	6.60037	4.1942	1.04855	1.67607	0.845312	0.211328	<.0001	9.18181e-06	cysW; sulfate/thiosulfate transport system permease protein
K02048	0.000516562	0.00206625	0.000516562	0.133057	0.512508	0.128127	0.1211	0.139958	cysP; sulfate/thiosulfate transport system substrate-binding protein
K02052	3.57779	1.6769	0.419224	8.0275	3.32707	0.831769	<.0001	0.000151881	ABC.SP.A; putative spermidine/putrescine transport system ATP-binding protein
K02053	0.365732	0.727858	0.181964	3.02771	2.30243	0.575607	<.0001	3.0485e-05	ABC.SP.P; putative spermidine/putrescine transport system permease protein
K02054	0.0452382	0.0539837	0.0134959	0.4756	0.246012	0.061503	<.0001	5.99662e-06	ABC.SP.P1; putative spermidine/putrescine transport system permease protein
K02055	0.258786	0.438328	0.109582	1.92149	2.90986	0.727464	<.0001	4.78987e-05	ABC.SP.S; putative spermidine/putrescine transport system substrate-binding protein
K02063	6.1311	2.95885	0.739712	2.19464	3.53733	0.884332	0.0004	0.000691974	thiP; thiamine transport system permease protein
K02064	7.00676	3.01363	0.753408	1.40841	1.9172	0.479301	<.0001	3.52558e-05	thiB, tbpA; thiamine transport system substrate-binding protein
K02065	51.8866	18.1465	4.53662	21.9083	9.93211	2.48303	<.0001	0.000112898	mlaF, linL, mkl; phospholipid/cholesterol/gamma-HCH transport system ATP-binding protein
K02066	101.914	28.7554	7.18886	73.2331	28.4133	7.10333	0.0075	0.0108475	mlaE, linK; phospholipid/cholesterol/gamma-HCH transport system permease protein
K02067	99.1943	28.9474	7.23686	73.3343	25.6621	6.41553	0.0159	0.021941	mlaD, linM; phospholipid/cholesterol/gamma-HCH transport system substrate-binding protein
K02071	82.6971	20.0165	5.00412	67.7956	12.8647	3.21618	0.0288	0.0376366	metN; D-methionine transport system ATP-binding protein
K02072	77.3005	16.2251	4.05629	60.445	11.5902	2.89755	0.0029	0.00444714	metI; D-methionine transport system permease protein
K02073	104.246	22.0187	5.50469	90.8424	19.7259	4.93147	0.1051	0.122388	metQ; D-methionine transport system substrate-binding protein
K02078	413.964	79.6108	19.9027	356.015	33.2943	8.32357	0.0418	0.0526727	acpP; acyl carrier protein
K02079	0.000957813	0.00383125	0.000957813	0.142782	0.552626	0.138157	0.0813	0.0961391	agaA; N-acetylgalactosamine-6-phosphate deacetylase [EC:3.5.1.25]
K02080	0	0	0	0.270949	0.835574	0.208893	0.0002	0.000445932	agaI; galactosamine-6-phosphate isomerase [EC:5.3.1.-]
K02083	0.799008	0.614492	0.153623	2.50268	0.761218	0.190304	<.0001	3.0485e-05	allC; allantoate deiminase [EC:3.5.3.9]
K02084	0.219282	0.702714	0.175678	0	0	0	0.1508	0.170457	APAF1; apoptotic protease-activating factor
K02090	0.352311	0.543192	0.135798	0	0	0	<.0001	9.87573e-06	CDK5; cyclin-dependent kinase 5 [EC:2.7.11.22]
K02106	37.4263	12.9236	3.23089	20.911	6.17214	1.54304	0.0003	0.000465495	atoE; short-chain fatty acids transporter
K02107	2.51792	3.20279	0.800698	3.26665	1.34872	0.337179	0.0029	0.00444714	ATPVG, ahaH, atpH; V/A-type H+/Na+-transporting ATPase subunit G/H
K02108	179.231	36.3612	9.09029	165.227	24.2008	6.05021	0.2136	0.236472	ATPF0A, atpB; F-type H+-transporting ATPase subunit a
K02109	192.819	35.7926	8.94815	242.035	20.321	5.08025	0.0002	0.000310146	ATPF0B, atpF; F-type H+-transporting ATPase subunit b
K02110	91.9455	20.0825	5.02063	106.414	12.0705	3.01763	0.0129	0.0180314	ATPF0C, atpE; F-type H+-transporting ATPase subunit c
K02111	214.237	45.9946	11.4987	247.52	17.0433	4.26083	0.0104	0.0147395	ATPF1A, atpA; F-type H+/Na+-transporting ATPase subunit alpha [EC:7.1.2.2 7.2.2.1]
K02112	202.565	45.0084	11.2521	229.376	17.5356	4.38389	0.0215	0.028733	ATPF1B, atpD; F-type H+/Na+-transporting ATPase subunit beta [EC:7.1.2.2 7.2.2.1]
K02113	157.835	28.3854	7.09634	188.332	20.2227	5.05567	0.0023	0.00352998	ATPF1D, atpH; F-type H+-transporting ATPase subunit delta
K02114	45.5864	10.7518	2.68795	84.6743	12.4952	3.1238	<.0001	5.38599e-06	ATPF1E, atpC; F-type H+-transporting ATPase subunit epsilon
K02115	196.115	40.0946	10.0236	191.823	16.972	4.24299	0.6785	0.694077	ATPF1G, atpG; F-type H+-transporting ATPase subunit gamma
K02117	34.3085	8.94143	2.23536	45.0978	14.5201	3.63004	0.0262	0.0344475	ATPVA, ntpA, atpA; V/A-type H+/Na+-transporting ATPase subunit A [EC:7.1.2.2 7.2.2.1]
K02118	36.8605	8.55756	2.13939	43.6082	14.0589	3.51472	0.2278	0.251576	ATPVB, ntpB, atpB; V/A-type H+/Na+-transporting ATPase subunit B
K02119	35.879	10.0322	2.50806	59.9306	14.0526	3.51315	<.0001	4.78987e-05	ATPVC, ntpC, atpC; V/A-type H+/Na+-transporting ATPase subunit C
K02120	49.3981	10.9776	2.7444	86.6361	15.6201	3.90502	<.0001	1.04859e-05	ATPVD, ntpD, atpD; V/A-type H+/Na+-transporting ATPase subunit D
K02121	59.0179	13.1786	3.29465	109.869	16.8972	4.22431	<.0001	6.88093e-06	ATPVE, ntpE, atpE; V/A-type H+/Na+-transporting ATPase subunit E
K02122	27.2462	6.53433	1.63358	40.8713	9.25076	2.31269	0.0001	0.000201456	ATPVF, ntpF, atpF; V/A-type H+/Na+-transporting ATPase subunit F
K02123	103.809	23.8972	5.97429	141.133	18.1377	4.53442	0.0001	0.00026839	ATPVI, ntpI, atpI; V/A-type H+/Na+-transporting ATPase subunit I
K02124	75.5331	19.8003	4.95007	103.083	13.2589	3.31473	0.0005	0.00079122	ATPVK, ntpK, atpK; V/A-type H+/Na+-transporting ATPase subunit K
K02125	0.0116209	0.0329664	0.0082416	0.0148152	0.0343941	0.00859853	0.6764	0.694077	ATPeF08, MTATP8, ATP8; F-type H+-transporting ATPase subunit 8
K02126	0.201044	0.235979	0.0589947	0.0444108	0.121773	0.0304432	0.0003	0.000466816	ATPeF0A, MTATP6, ATP6; F-type H+-transporting ATPase subunit a
K02128	0.15625	0.145417	0.0363542	0.240987	0.276581	0.0691452	0.4285	0.450049	ATPeF0C, ATP5G, ATP9; F-type H+-transporting ATPase subunit c
K02132	0.170029	0.138186	0.0345464	0.0430971	0.109272	0.027318	0.0001	0.000263258	ATPeF1A, ATP5A1, ATP1; F-type H+-transporting ATPase subunit alpha
K02144	2.16223	3.17284	0.79321	0	0	0	<.0001	5.38599e-06	ATPeV1H; V-type H+-transporting ATPase subunit H
K02145	23.8701	18.8172	4.7043	0.00554144	0.0114236	0.0028559	<.0001	5.38599e-06	ATPeV1A, ATP6A; V-type H+-transporting ATPase subunit A [EC:7.1.2.2]
K02146	21.3069	15.9778	3.99446	0.0260733	0.043833	0.0109582	<.0001	5.38599e-06	ATPeV0D, ATP6D; V-type H+-transporting ATPase subunit d
K02147	20.1451	16.4562	4.11405	0.00329131	0.00812442	0.00203111	<.0001	5.38599e-06	ATPeV1B, ATP6B; V-type H+-transporting ATPase subunit B
K02148	8.03469	6.11628	1.52907	0.000438438	0.00175375	0.000438438	<.0001	5.38599e-06	ATPeV1C, ATP6C; V-type H+-transporting ATPase subunit C
K02149	8.24868	6.12532	1.53133	0	0	0	<.0001	5.38599e-06	ATPeV1D, ATP6M; V-type H+-transporting ATPase subunit D
K02150	18.1022	14.8571	3.71428	0.194849	0.301941	0.0754853	<.0001	5.99662e-06	ATPeV1E, ATP6E; V-type H+-transporting ATPase subunit E
K02151	6.13877	5.12959	1.2824	0.00272463	0.0108985	0.00272463	<.0001	5.38599e-06	ATPeV1F, ATP6S14; V-type H+-transporting ATPase subunit F
K02152	3.754	3.47761	0.869403	0.00266875	0.010675	0.00266875	<.0001	5.38599e-06	ATPeV1G, ATP6G; V-type H+-transporting ATPase subunit G
K02153	3.14853	2.80135	0.700338	0	0	0	<.0001	5.38599e-06	ATPeV0E, ATP6H; V-type H+-transporting ATPase subunit e
K02154	71.7103	56.4889	14.1222	0.127283	0.202267	0.0505667	<.0001	5.38599e-06	ATPeV0A, ATP6N; V-type H+-transporting ATPase subunit a
K02155	62.2876	51.0231	12.7558	0.00988025	0.0221352	0.00553379	<.0001	5.38599e-06	ATPeV0C, ATP6L; V-type H+-transporting ATPase 16kDa proteolipid subunit
K02156	14.4254	12.3486	3.08714	0.004058	0.00549854	0.00137464	<.0001	5.38599e-06	AUB, PIWI; aubergine
K02160	16.4815	8.05754	2.01439	24.7046	8.48255	2.12064	0.0026	0.00395853	accB, bccP; acetyl-CoA carboxylase biotin carboxyl carrier protein
K02169	0.816544	0.725231	0.181308	3.02399	5.23722	1.30931	0.3657	0.387168	bioC; malonyl-CoA O-methyltransferase [EC:2.1.1.197]
K02170	1.28527	3.7123	0.928075	0.222737	0.539686	0.134922	0.0167	0.02304	bioH; pimeloyl-[acyl-carrier protein] methyl ester esterase [EC:3.1.1.85]
K02171	297.564	73.5392	18.3848	646.77	72.6882	18.1721	<.0001	5.38599e-06	blaI; BlaI family transcriptional regulator, penicillinase repressor
K02172	310.882	97.7214	24.4303	785.95	92.0649	23.0162	<.0001	5.38599e-06	blaR1; bla regulator protein blaR1
K02183	35.1857	27.6329	6.90823	0.00780444	0.0168556	0.00421391	<.0001	5.38599e-06	CALM; calmodulin
K02188	93.235	23.7889	5.94722	26.0799	4.92044	1.23011	<.0001	5.38599e-06	cbiD; cobalt-precorrin-5B (C1)-methyltransferase [EC:2.1.1.195]
K02189	47.363	11.029	2.75724	23.9673	6.48813	1.62203	<.0001	1.04859e-05	cbiG; cobalt-precorrin 5A hydrolase [EC:3.7.1.12]
K02190	102.744	26.9508	6.73771	28.1932	7.23013	1.80753	<.0001	5.38599e-06	cbiK; sirohydrochlorin cobaltochelatase [EC:4.99.1.3]
K02191	3.68486	1.8583	0.464574	0.626805	0.362692	0.0906729	<.0001	5.38599e-06	cbiT; cobalt-precorrin-6B (C15)-methyltransferase [EC:2.1.1.196]
K02193	0.108541	0.118362	0.0295905	0.911004	1.00522	0.251306	<.0001	1.04859e-05	ccmA; heme exporter protein A [EC:7.6.2.5]
K02194	1.09244	1.06313	0.265783	1.65519	0.972425	0.243106	0.0143	0.0199165	ccmB; heme exporter protein B
K02195	1.35065	1.23897	0.309743	1.68396	1.11582	0.278954	0.1871	0.208371	ccmC; heme exporter protein C
K02196	0.129193	0.13927	0.0348174	0.380501	0.21424	0.0535599	0.0008	0.00140094	ccmD; heme exporter protein D
K02201	4.19616	6.33682	1.5842	4.2253	1.66721	0.416802	0.0418	0.0526727	E2.7.7.3B; pantetheine-phosphate adenylyltransferase [EC:2.7.7.3]
K02203	59.2668	14.6476	3.6619	25.2172	6.78573	1.69643	<.0001	5.99662e-06	thrH; phosphoserine / homoserine phosphotransferase [EC:3.1.3.3 2.7.1.39]
K02204	0.354179	0.284369	0.0710922	1.81962	1.87462	0.468654	<.0001	7.34758e-05	thrB2; homoserine kinase type II [EC:2.7.1.39]
K02209	6.47439	4.84426	1.21106	0.0018765	0.00549403	0.00137351	<.0001	5.38599e-06	MCM5, CDC46; DNA replication licensing factor MCM5 [EC:3.6.4.12]
K02210	7.36254	5.68204	1.42051	0.0019405	0.00347213	0.000868033	<.0001	5.38599e-06	MCM7, CDC47; DNA replication licensing factor MCM7 [EC:3.6.4.12]
K02212	6.31206	4.68735	1.17184	0.000416875	0.0016675	0.000416875	<.0001	5.38599e-06	MCM4, CDC54; DNA replication licensing factor MCM4 [EC:3.6.4.12]
K02214	2.17284	1.9989	0.499726	0.0162151	0.0478318	0.0119579	<.0001	5.38599e-06	CDC7; cell division control protein 7 [EC:2.7.11.1]
K02219	25.7671	21.6858	5.42144	0.00562194	0.0184798	0.00461995	<.0001	5.38599e-06	CKS1; cyclin-dependent kinase regulatory subunit CKS1
K02224	92.4622	18.4319	4.60797	42.1328	7.72211	1.93053	<.0001	5.99662e-06	cobB-cbiA; cobyrinic acid a,c-diamide synthase [EC:6.3.5.9 6.3.5.11]
K02225	0.0320693	0.0277364	0.00693411	0.120796	0.136231	0.0340579	0.0027	0.00416582	cobC1, cobC; cobalamin biosynthetic protein CobC
K02226	13.626	6.24802	1.56201	26.4919	6.8158	1.70395	<.0001	5.56604e-05	cobC, phpB; alpha-ribazole phosphatase [EC:3.1.3.73]
K02227	91.8822	22.1755	5.54387	29.7412	8.00154	2.00038	<.0001	5.99662e-06	cbiB, cobD; adenosylcobinamide-phosphate synthase [EC:6.3.1.10]
K02228	0.0317174	0.0378712	0.0094678	0.241502	0.279835	0.0699587	<.0001	0.000145199	cobF; precorrin-6A synthase [EC:2.1.1.152]
K02229	0.0227917	0.0145233	0.00363083	0.107382	0.16178	0.0404449	0.0699	0.0851578	cobG; precorrin-3B synthase [EC:1.14.13.83]
K02230	9.23189	4.99756	1.24939	11.9111	7.33058	1.83264	0.2744	0.300173	cobN; cobaltochelatase CobN [EC:6.6.1.2]
K02231	93.1373	24.8543	6.21357	76.6525	16.3983	4.09958	0.0546	0.0671479	cobP, cobU; adenosylcobinamide kinase / adenosylcobinamide-phosphate guanylyltransferase [EC:2.7.1.156 2.7.7.62]
K02232	90.1181	19.3124	4.8281	29.7895	5.6457	1.41142	<.0001	5.38599e-06	cobQ, cbiP; adenosylcobyric acid synthase [EC:6.3.5.10]
K02233	92.2083	22.1473	5.53682	65.287	15.4466	3.86166	0.001	0.00170309	E2.7.8.26, cobS, cobV; adenosylcobinamide-GDP ribazoletransferase [EC:2.7.8.26]
K02250	22.1976	9.21103	2.30276	31.0277	17.2413	4.31032	0.1521	0.171147	comK; competence protein ComK
K02256	0.113132	0.0890475	0.0222619	0.0302651	0.0718773	0.0179693	0.0001	0.000227739	COX1; cytochrome c oxidase subunit 1 [EC:7.1.1.9]
K02257	0.227999	0.131187	0.0327967	1.0685	1.03234	0.258085	<.0001	0.000175964	COX10, ctaB, cyoE; heme o synthase [EC:2.5.1.141]
K02258	0.108431	0.0655128	0.0163782	0.310911	0.351059	0.0877646	0.0863	0.101751	COX11, ctaG; cytochrome c oxidase assembly protein subunit 11
K02259	0.255419	0.127005	0.0317511	0.848799	0.882514	0.220628	0.0007	0.00116369	COX15, ctaA; cytochrome c oxidase assembly protein subunit 15
K02262	0.0942893	0.114539	0.0286348	0.0295239	0.0962444	0.0240611	0.0012	0.00195908	COX3; cytochrome c oxidase subunit 3
K02274	0.0658953	0.0404913	0.0101228	0.352205	0.340972	0.0852431	<.0001	2.27944e-05	coxA, ctaD; cytochrome c oxidase subunit I [EC:7.1.1.9]
K02275	0.206416	0.0860012	0.0215003	0.991163	0.855686	0.213921	<.0001	9.18181e-06	coxB, ctaC; cytochrome c oxidase subunit II [EC:7.1.1.9]
K02276	0.235899	0.131064	0.0327661	0.980165	0.842274	0.210569	<.0001	3.52558e-05	coxC, ctaE; cytochrome c oxidase subunit III [EC:7.1.1.9]
K02277	0.176852	0.0927727	0.0231932	0.68753	0.615179	0.153795	<.0001	8.51833e-05	coxD, ctaF; cytochrome c oxidase subunit IV [EC:7.1.1.9]
K02291	0.266951	0.120418	0.0301044	11.4446	10.807	2.70176	<.0001	5.38599e-06	crtB; 15-cis-phytoene synthase [EC:2.5.1.32]
K02294	0.0413498	0.0327763	0.00819407	0.191016	0.2707	0.067675	0.0074	0.0108475	crtR; beta-carotene hydroxylase [EC:1.14.13.-]
K02297	0.0261591	0.0186126	0.00465314	0.338262	0.858576	0.214644	0.0019	0.00293556	cyoA; cytochrome o ubiquinol oxidase subunit II [EC:7.1.1.3]
K02298	0.0404878	0.0307334	0.00768335	0.376726	0.650431	0.162608	<.0001	1.42253e-05	cyoB; cytochrome o ubiquinol oxidase subunit I [EC:7.1.1.3]
K02299	0.0416418	0.0395593	0.00988983	0.258086	0.390457	0.0976143	0.0025	0.00394967	cyoC; cytochrome o ubiquinol oxidase subunit III
K02300	0.0474866	0.0413209	0.0103302	0.249154	0.456123	0.114031	0.0082	0.0118346	cyoD; cytochrome o ubiquinol oxidase subunit IV
K02302	0.346513	0.27613	0.0690326	0.483215	0.790866	0.197717	0.6511	0.668781	cysG; uroporphyrin-III C-methyltransferase / precorrin-2 dehydrogenase / sirohydrochlorin ferrochelatase [EC:2.1.1.107 1.3.1.76 4.99.1.4]
K02303	7.17499	6.74266	1.68567	8.97512	2.7928	0.698201	0.0075	0.0108475	cobA; uroporphyrin-III C-methyltransferase [EC:2.1.1.107]
K02313	348.798	57.7392	14.4348	572.705	28.4278	7.10695	<.0001	5.38599e-06	dnaA; chromosomal replication initiator protein
K02314	475.184	80.0107	20.0027	514.674	28.0908	7.0227	0.3657	0.387168	dnaB; replicative DNA helicase [EC:3.6.4.12]
K02316	505.21	86.0242	21.506	550.223	28.3358	7.08396	0.2136	0.236472	dnaG; DNA primase [EC:2.7.7.101]
K02317	0	0	0	0.152399	0.605564	0.151391	0.1508	0.170457	dnaT; DNA replication protein DnaT
K02319	6.27138	9.76064	2.44016	6.3015	2.39319	0.598297	0.0418	0.0526727	pol; DNA polymerase, archaea type [EC:2.7.7.7]
K02320	7.28307	5.42062	1.35516	0.000978687	0.002863	0.000715749	<.0001	5.38599e-06	POLA1; DNA polymerase alpha subunit A [EC:2.7.7.7]
K02321	5.058	3.86545	0.966363	0.0167128	0.0625847	0.0156462	<.0001	5.38599e-06	POLA2; DNA polymerase alpha subunit B
K02322	6.00534	9.46926	2.36731	5.76073	2.30809	0.577022	0.0704	0.0854759	polC; DNA polymerase II large subunit [EC:2.7.7.7]
K02323	7.08487	10.9175	2.72938	6.92602	2.3567	0.589176	0.0458	0.0572048	polB; DNA polymerase II small subunit [EC:2.7.7.7]
K02324	6.94779	5.27743	1.31936	0.033668	0.108861	0.0272154	<.0001	5.38599e-06	POLE; DNA polymerase epsilon subunit 1 [EC:2.7.7.7]
K02325	4.13642	3.48283	0.870707	0	0	0	<.0001	5.38599e-06	POLE2; DNA polymerase epsilon subunit 2 [EC:2.7.7.7]
K02327	4.42225	3.3062	0.82655	0.0364041	0.0824079	0.020602	<.0001	5.38599e-06	POLD1; DNA polymerase delta subunit 1 [EC:2.7.7.7]
K02328	4.11839	3.39537	0.848842	0	0	0	<.0001	5.38599e-06	POLD2; DNA polymerase delta subunit 2
K02335	290.129	52.8387	13.2097	354.219	23.7477	5.93693	0.0001	0.000232838	polA; DNA polymerase I [EC:2.7.7.7]
K02337	270.795	48.5877	12.1469	324.066	24.9611	6.24027	0.0029	0.00444714	dnaE; DNA polymerase III subunit alpha [EC:2.7.7.7]
K02338	370.072	58.8311	14.7078	609.927	34.2363	8.55907	<.0001	5.38599e-06	dnaN; DNA polymerase III subunit beta [EC:2.7.7.7]
K02339	0.269836	0.291002	0.0727504	0.836426	0.5122	0.12805	0.0002	0.000408403	holC; DNA polymerase III subunit chi [EC:2.7.7.7]
K02340	257.772	46.9248	11.7312	363.492	20.1914	5.04784	<.0001	6.88093e-06	holA; DNA polymerase III subunit delta [EC:2.7.7.7]
K02341	58.9434	15.7774	3.94436	102.189	21.1336	5.28339	<.0001	1.66322e-05	holB; DNA polymerase III subunit delta' [EC:2.7.7.7]
K02342	409.762	70.9753	17.7438	320.819	29.2251	7.30627	0.0002	0.000355129	dnaQ; DNA polymerase III subunit epsilon [EC:2.7.7.7]
K02343	294.313	51.8331	12.9583	391.78	20.9027	5.22569	<.0001	3.52558e-05	dnaX; DNA polymerase III subunit gamma/tau [EC:2.7.7.7]
K02344	0	0	0	0.0555289	0.216367	0.0540918	0.1508	0.170457	holD; DNA polymerase III subunit psi [EC:2.7.7.7]
K02345	0	0	0	0.0844739	0.319084	0.0797711	0.1508	0.170457	holE; DNA polymerase III subunit theta [EC:2.7.7.7]
K02350	0.945034	0.792049	0.198012	0	0	0	<.0001	5.38599e-06	REV3L, POLZ; DNA polymerase zeta [EC:2.7.7.7]
K02358	309.377	56.7589	14.1897	431.942	35.0725	8.76813	<.0001	6.88093e-06	tuf, TUFM; elongation factor Tu
K02361	0.00420087	0.00781602	0.001954	0.156471	0.490042	0.122511	0.0047	0.00702862	entC; isochorismate synthase [EC:5.4.4.2]
K02362	0.587623	2.29479	0.573697	0.17866	0.616718	0.154179	0.653	0.670617	entD; enterobactin synthetase component D [EC:6.3.2.14 2.7.8.-]
K02363	0	0	0	0.12051	0.460676	0.115169	0.0737	0.087769	entE, dhbE, vibE, mxcE; 2,3-dihydroxybenzoate-AMP ligase [EC:6.3.2.14 2.7.7.58]
K02364	0	0	0	0.137638	0.518729	0.129682	0.0015	0.00242685	entF; enterobactin synthetase component F [EC:6.3.2.14]
K02365	0	0	0	0.0253957	0.0491395	0.0122849	0.0079	0.0113948	ESP1; separase [EC:3.4.22.49]
K02371	55.1542	14.0833	3.52083	43.0668	10.3603	2.59008	0.0042	0.00625546	fabK; enoyl-[acyl-carrier protein] reductase II [EC:1.3.1.9]
K02372	90.0685	24.7267	6.18169	70.9731	14.6835	3.67087	0.0075	0.0108475	fabZ; 3-hydroxyacyl-[acyl-carrier-protein] dehydratase [EC:4.2.1.59]
K02377	151.904	37.1014	9.27535	53.0466	18.0691	4.51728	<.0001	5.99662e-06	TSTA3, fcl; GDP-L-fucose synthase [EC:1.1.1.271]
K02386	3.70085	2.35054	0.587636	5.33321	6.55143	1.63786	0.5718	0.591757	flgA; flagella basal body P-ring formation protein FlgA
K02387	25.8338	8.31738	2.07935	20.8934	7.11604	1.77901	0.1051	0.122388	flgB; flagellar basal-body rod protein FlgB
K02388	26.5575	8.37515	2.09379	19.8931	7.19674	1.79919	0.0288	0.0376366	flgC; flagellar basal-body rod protein FlgC
K02389	30.8746	9.66359	2.4159	23.7928	8.39804	2.09951	0.0546	0.0671479	flgD; flagellar basal-body rod modification protein FlgD
K02390	37.6602	13.1863	3.29659	22.8409	7.69663	1.92416	0.002	0.0031379	flgE; flagellar hook protein FlgE
K02391	29.1732	9.12594	2.28148	21.7151	8.28442	2.0711	0.0288	0.0376366	flgF; flagellar basal-body rod protein FlgF
K02392	11.328	4.7971	1.19928	4.97821	3.77246	0.943115	0.0008	0.00132396	flgG; flagellar basal-body rod protein FlgG
K02393	3.82961	1.98745	0.496862	3.38643	4.64967	1.16242	0.0237	0.03148	flgH; flagellar L-ring protein precursor FlgH
K02394	4.16632	2.20848	0.55212	3.00313	3.56403	0.891007	0.0176	0.0238336	flgI; flagellar P-ring protein precursor FlgI
K02396	63.283	19.5	4.87499	62.8807	22.1614	5.54034	0.9699	0.971137	flgK; flagellar hook-associated protein 1 FlgK
K02397	32.2833	10.1741	2.54351	21.2506	7.95863	1.98966	0.0067	0.00977542	flgL; flagellar hook-associated protein 3 FlgL
K02398	22.2159	7.26147	1.81537	15.4488	5.44474	1.36119	0.0093	0.0132941	flgM; negative regulator of flagellin synthesis FlgM
K02399	15.7879	5.10817	1.27704	14.5634	6.22313	1.55578	0.6242	0.642607	flgN; flagella synthesis protein FlgN
K02400	29.5869	9.54659	2.38665	17.3105	6.37699	1.59425	0.001	0.00170309	flhA; flagellar biosynthesis protein FlhA
K02401	33.6012	11.3317	2.83293	21.8794	7.97071	1.99268	0.0053	0.00785151	flhB; flagellar biosynthetic protein FlhB
K02402	0.668573	2.64313	0.660783	0.141042	0.488886	0.122221	0.3419	0.364066	flhC; flagellar transcriptional activator FlhC
K02403	0	0	0	0.18252	0.689992	0.172498	0.1508	0.170457	flhD; flagellar transcriptional activator FlhD
K02405	34.7818	12.0177	3.00444	26.5141	8.76378	2.19095	0.0765	0.0905693	fliA; RNA polymerase sigma factor for flagellar operon FliA
K02406	156.861	51.5559	12.889	115.427	45.976	11.494	0.0317	0.0410843	fliC; flagellin
K02407	58.155	18.4771	4.61927	51.2601	18.8043	4.70108	0.4287	0.450049	fliD; flagellar hook-associated protein 2
K02408	23.6104	8.47788	2.11947	19.4445	7.64376	1.91094	0.2427	0.267552	fliE; flagellar hook-basal body complex protein FliE
K02409	34.8228	11.2685	2.81714	28.0834	11.4816	2.8704	0.1521	0.171147	fliF; flagellar M-ring protein FliF
K02410	56.0125	20.7256	5.18141	34.3572	11.452	2.86301	0.0037	0.00558518	fliG; flagellar motor switch protein FliG
K02411	28.2994	10.1291	2.53227	22.2298	9.58481	2.3962	0.1748	0.195497	fliH; flagellar assembly protein FliH
K02412	24.0923	7.71469	1.92867	15.427	5.48004	1.37001	0.0018	0.00278261	fliI; flagellum-specific ATP synthase [EC:7.4.2.8]
K02413	28.6231	9.79038	2.44759	28.7902	11.4601	2.86502	0.9699	0.971137	fliJ; flagellar FliJ protein
K02414	35.5642	11.9773	2.99434	27.9438	10.9348	2.73371	0.1134	0.131454	fliK; flagellar hook-length control protein FliK
K02416	36.4048	11.5886	2.89715	30.9027	11.0412	2.7603	0.2278	0.251576	fliM; flagellar motor switch protein FliM
K02417	30.5546	9.92908	2.48227	25.5572	9.60826	2.40207	0.1871	0.208371	fliNY, fliN; flagellar motor switch protein FliN/FliY
K02418	30.0763	10.3031	2.57578	28.2489	11.8366	2.95914	0.7063	0.720517	fliOZ, fliO; flagellar protein FliO/FliZ
K02419	32.4684	10.7753	2.69383	24.9804	8.92269	2.23067	0.0765	0.0905693	fliP; flagellar biosynthetic protein FliP
K02420	19.8189	6.43468	1.60867	16.8644	6.18234	1.54558	0.2427	0.267552	fliQ; flagellar biosynthetic protein FliQ
K02421	31.0019	9.92157	2.48039	23.4681	8.62228	2.15557	0.0418	0.0526727	fliR; flagellar biosynthetic protein FliR
K02422	49.8178	16.0914	4.02286	46.353	18.9398	4.73496	0.6242	0.642607	fliS; flagellar protein FliS
K02423	1.12298	0.949012	0.237253	2.11156	1.67942	0.419856	0.0546	0.0671479	fliT; flagellar protein FliT
K02424	13.1849	4.73452	1.18363	2.61451	1.11671	0.279176	<.0001	5.38599e-06	fliY, tcyA; L-cystine transport system substrate-binding protein
K02425	0	0	0	0.107	0.402561	0.10064	0.0737	0.087769	fliZ; regulator of sigma S factor FliZ
K02433	76.576	15.7941	3.94853	142.704	24.8232	6.20581	<.0001	9.18181e-06	gatA, QRSL1; aspartyl-tRNA(Asn)/glutamyl-tRNA(Gln) amidotransferase subunit A [EC:6.3.5.6 6.3.5.7]
K02434	111.868	26.4405	6.61013	249.223	48.2593	12.0648	<.0001	5.99662e-06	gatB, PET112; aspartyl-tRNA(Asn)/glutamyl-tRNA(Gln) amidotransferase subunit B [EC:6.3.5.6 6.3.5.7]
K02435	43.7956	12.3246	3.08116	81.7572	14.0007	3.50017	<.0001	9.18181e-06	gatC, GATC; aspartyl-tRNA(Asn)/glutamyl-tRNA(Gln) amidotransferase subunit C [EC:6.3.5.6 6.3.5.7]
K02437	101	22.2833	5.57083	63.5667	16.6198	4.15495	<.0001	0.000175964	gcvH, GCSH; glycine cleavage system H protein
K02438	0	0	0	0.159339	0.60211	0.150527	0.0035	0.00534752	glgX; glycogen debranching enzyme [EC:3.2.1.196]
K02439	0	0	0	0.129186	0.482242	0.120561	0.0359	0.0455167	glpE; thiosulfate sulfurtransferase [EC:2.8.1.1]
K02446	1.09037	2.79364	0.698411	5.7014	2.98109	0.745273	<.0001	8.51833e-05	glpX; fructose-1,6-bisphosphatase II [EC:3.1.3.11]
K02452	1.36418	3.89237	0.973092	0.356664	0.703755	0.175939	0.0899	0.105432	gspC; general secretion pathway protein C
K02453	2.05003	3.9021	0.975526	1.4429	0.986721	0.24668	0.7063	0.720517	gspD; general secretion pathway protein D
K02454	1.50367	3.46079	0.865196	1.13977	0.574061	0.143515	0.0317	0.0410843	gspE; general secretion pathway protein E [EC:7.4.2.8]
K02455	1.11558	3.58643	0.896607	0.196387	0.49323	0.123307	0.2499	0.275392	gspF; general secretion pathway protein F
K02456	12.9128	5.54736	1.38684	5.18332	5.89426	1.47357	0.0006	0.00102927	gspG; general secretion pathway protein G
K02457	1.04835	3.24359	0.810899	0.413472	0.393301	0.0983253	0.0973	0.113712	gspH; general secretion pathway protein H
K02458	0.807921	2.46016	0.615039	0.319822	0.36095	0.0902375	0.3657	0.387168	gspI; general secretion pathway protein I
K02459	1.59035	3.6254	0.906349	0.953767	0.751561	0.18789	0.2582	0.283517	gspJ; general secretion pathway protein J
K02460	2.48989	3.71689	0.929223	1.56969	0.956779	0.239195	0.3089	0.334345	gspK; general secretion pathway protein K
K02461	0.340859	0.558536	0.139634	0.312109	0.475269	0.118817	0.386	0.407501	gspL; general secretion pathway protein L
K02462	0.30199	0.479621	0.119905	0.33491	0.519476	0.129869	0.5217	0.542654	gspM; general secretion pathway protein M
K02463	1.16406	3.73064	0.932659	0.105298	0.112411	0.0281028	0.1513	0.171063	gspN; general secretion pathway protein N
K02471	9.46605	4.47934	1.11983	5.17543	4.43042	1.10761	0.002	0.0031379	bacA; vitamin B12/bleomycin/antimicrobial peptide transport system ATP-binding/permease protein
K02472	64.5284	16.9363	4.23408	42.9863	6.88306	1.72077	0.0003	0.000465495	wecC; UDP-N-acetyl-D-mannosaminuronic acid dehydrogenase [EC:1.1.1.336]
K02473	43.1927	14.87	3.7175	30.7467	11.6732	2.91829	0.0237	0.03148	wbpP; UDP-N-acetylglucosamine 4-epimerase [EC:5.1.3.7]
K02474	110.104	28.4917	7.12292	72.5895	16.1167	4.02917	0.0002	0.000355129	wbpO; UDP-N-acetyl-D-galactosamine dehydrogenase [EC:1.1.1.-]
K02488	9.70689	5.09106	1.27276	10.5287	3.84803	0.962007	0.3271	0.348789	pleD; two-component system, cell cycle response regulator [EC:2.7.7.65]
K02490	0	0	0	0.0207802	0.0624866	0.0156216	0.1508	0.170457	spo0F; two-component system, response regulator, stage 0 sporulation protein F
K02492	28.8509	9.41476	2.35369	25.7277	12.7726	3.19315	0.1051	0.122388	hemA; glutamyl-tRNA reductase [EC:1.2.1.70]
K02495	261.85	51.5848	12.8962	455.155	39.4742	9.86854	<.0001	5.38599e-06	hemN, hemZ; oxygen-independent coproporphyrinogen III oxidase [EC:1.3.98.3]
K02496	1.77954	4.24583	1.06146	1.53935	5.5595	1.38987	0.0143	0.0199165	hemX; uroporphyrin-III C-methyltransferase [EC:2.1.1.107]
K02500	126.839	28.2862	7.07154	153.5	14.6091	3.65227	0.0053	0.00785151	hisF; imidazole glycerol-phosphate synthase subunit HisF [EC:4.3.2.10]
K02501	131.416	26.2301	6.55753	168.929	13.7721	3.44302	<.0001	0.000151881	hisH; imidazole glycerol-phosphate synthase subunit HisH [EC:4.3.2.10]
K02502	40.3356	12.8481	3.21204	58.1155	13.7231	3.43078	0.0015	0.00246344	hisZ; ATP phosphoribosyltransferase regulatory subunit
K02509	0.0121069	0.0157795	0.00394488	0.213304	0.337568	0.084392	<.0001	0.000194398	hpaH; 2-oxo-hept-3-ene-1,7-dioate hydratase [EC:4.2.1.-]
K02510	13.7958	5.90521	1.4763	56.8903	12.7221	3.18052	<.0001	5.38599e-06	hpaI, hpcH; 4-hydroxy-2-oxoheptanedioate aldolase [EC:4.1.2.52]
K02516	0.110547	0.202118	0.0505296	0	0	0	0.0006	0.00105344	PRMT5, HSL7; type II protein arginine methyltransferase [EC:2.1.1.320]
K02517	81.53	25.7667	6.44166	37.9651	22.5005	5.62512	0.0001	0.00026839	lpxL, htrB; Kdo2-lipid IVA lauroyltransferase/acyltransferase [EC:2.3.1.241 2.3.1.-]
K02523	16.6354	7.15735	1.78934	13.3514	7.9834	1.99585	0.1051	0.122388	ispB; octaprenyl-diphosphate synthase [EC:2.5.1.90]
K02527	129.945	30.7777	7.69443	65.1326	31.6243	7.90606	<.0001	7.34758e-05	kdtA, waaA; 3-deoxy-D-manno-octulosonic-acid transferase [EC:2.4.99.12 2.4.99.13 2.4.99.14 2.4.99.15]
K02535	22.3842	7.0261	1.75653	20.8926	8.62804	2.15701	0.4287	0.450049	lpxC; UDP-3-O-[3-hydroxymyristoyl] N-acetylglucosamine deacetylase [EC:3.5.1.108]
K02536	161.992	36.5192	9.12981	84.7762	27.5726	6.89314	<.0001	4.0984e-05	lpxD; UDP-3-O-[3-hydroxymyristoyl] glucosamine N-acyltransferase [EC:2.3.1.191]
K02537	0	0	0	0.0325334	0.0367969	0.00919923	0.0006	0.00105344	MAD2; mitotic spindle assembly checkpoint protein MAD2
K02540	6.61855	5.03436	1.25859	0.0205852	0.0653557	0.0163389	<.0001	5.38599e-06	MCM2; DNA replication licensing factor MCM2 [EC:3.6.4.12]
K02541	6.32034	4.81581	1.20395	0.00196687	0.00356625	0.000891562	<.0001	5.38599e-06	MCM3; DNA replication licensing factor MCM3 [EC:3.6.4.12]
K02542	6.90268	5.08932	1.27233	0.000450625	0.0018025	0.000450625	<.0001	5.38599e-06	MCM6; DNA replication licensing factor MCM6 [EC:3.6.4.12]
K02548	115.524	27.8416	6.96039	56.9771	18.4418	4.61044	<.0001	3.0485e-05	menA; 1,4-dihydroxy-2-naphthoate polyprenyltransferase [EC:2.5.1.74]
K02549	10.9194	8.14378	2.03595	3.87168	1.85719	0.464297	0.0003	0.000608085	menC; O-succinylbenzoate synthase [EC:4.2.1.113]
K02551	37.9817	15.9116	3.97791	24.7797	17.6045	4.40113	0.0104	0.0147395	menD; 2-succinyl-5-enolpyruvyl-6-hydroxy-3-cyclohexene-1-carboxylate synthase [EC:2.2.1.9]
K02552	0	0	0	0.131651	0.406107	0.101527	0.0171	0.0233006	menF; menaquinone-specific isochorismate synthase [EC:5.4.4.2]
K02554	0.105734	0.106035	0.0265088	0.707889	0.649038	0.162259	<.0001	0.000112898	mhpD; 2-keto-4-pentenoate hydratase [EC:4.2.1.80]
K02556	32.01	10.1949	2.54873	28.1847	8.82381	2.20595	0.407	0.428762	motA; chemotaxis protein MotA
K02557	103.429	24.3782	6.09455	30.9982	8.77768	2.19442	<.0001	5.38599e-06	motB; chemotaxis protein MotB
K02560	0	0	0	0.144991	0.558039	0.13951	0.0737	0.087769	lpxM, msbB; lauroyl-Kdo2-lipid IVA myristoyltransferase [EC:2.3.1.243]
K02563	266.091	47.8337	11.9584	374.761	19.5823	4.89558	<.0001	5.99662e-06	murG; UDP-N-acetylglucosamine--N-acetylmuramyl-(pentapeptide) pyrophosphoryl-undecaprenol N-acetylglucosamine transferase [EC:2.4.1.227]
K02564	283.969	31.9956	7.99889	347.558	23.6723	5.91807	<.0001	3.0485e-05	nagB, GNPDA; glucosamine-6-phosphate deaminase [EC:3.5.99.6]
K02567	0.181494	0.249329	0.0623321	0.512211	0.72609	0.181523	0.0042	0.00625546	napA; nitrate reductase (cytochrome) [EC:1.9.6.1]
K02568	0.0148581	0.0234133	0.00585331	0.319192	0.376165	0.0940413	<.0001	5.38599e-06	napB; nitrate reductase (cytochrome), electron transfer subunit
K02575	1.3755	2.46543	0.616357	1.01046	1.18211	0.295528	0.7345	0.747591	NRT, narK, nrtP, nasA; MFS transporter, NNP family, nitrate/nitrite transporter
K02584	5.3027	3.76867	0.942167	13.4364	15.2529	3.81322	0.2136	0.236472	nifA; Nif-specific regulatory protein
K02588	42.6915	10.9487	2.73717	13.6867	3.71133	0.927831	<.0001	5.38599e-06	nifH; nitrogenase iron protein NifH
K02594	0	0	0	0.0982074	0.190547	0.0476367	0.0006	0.00105344	nifV; homocitrate synthase NifV [EC:2.3.3.14]
K02604	2.83714	2.19672	0.549181	0.00440188	0.00860061	0.00215015	<.0001	5.38599e-06	ORC2; origin recognition complex subunit 2
K02607	0.277932	0.5214	0.13035	0	0	0	0.0002	0.000445932	ORC5; origin recognition complex subunit 5
K02609	0.157793	0.0774229	0.0193557	0.826975	0.896123	0.224031	<.0001	3.52558e-05	paaA; ring-1,2-phenylacetyl-CoA epoxidase subunit PaaA [EC:1.14.13.149]
K02610	0.121811	0.100978	0.0252445	0.553335	0.521466	0.130367	0.0003	0.000531645	paaB; ring-1,2-phenylacetyl-CoA epoxidase subunit PaaB
K02611	0.13813	0.0844185	0.0211046	0.738561	0.726286	0.181571	<.0001	0.000151881	paaC; ring-1,2-phenylacetyl-CoA epoxidase subunit PaaC [EC:1.14.13.149]
K02612	0.163962	0.0745852	0.0186463	0.65656	0.629177	0.157294	0.0003	0.000608085	paaD; ring-1,2-phenylacetyl-CoA epoxidase subunit PaaD
K02613	0.173989	0.071877	0.0179692	0.76294	0.713525	0.178381	<.0001	2.64595e-05	paaE; ring-1,2-phenylacetyl-CoA epoxidase subunit PaaE
K02614	73.2438	16.5801	4.14502	39.577	5.65891	1.41473	<.0001	5.38599e-06	paaI; acyl-CoA thioesterase [EC:3.1.2.-]
K02615	0	0	0	0.113078	0.436718	0.10918	0.0737	0.087769	paaJ; 3-oxo-5,6-didehydrosuberyl-CoA/3-oxoadipyl-CoA thiolase [EC:2.3.1.223 2.3.1.174]
K02618	0.164003	0.0704417	0.0176104	0.811292	0.794957	0.198739	<.0001	0.000151881	paaZ; oxepin-CoA hydrolase / 3-oxo-5,6-dehydrosuberyl-CoA semialdehyde dehydrogenase [EC:3.3.2.12 1.2.1.91]
K02619	0.00782256	0.0103318	0.00258294	0.17244	0.473189	0.118297	0.0192	0.025953	pabC; 4-amino-4-deoxychorismate lyase [EC:4.1.3.38]
K02626	4.85057	6.43106	1.60777	7.8804	3.80781	0.951951	0.0005	0.000904344	pdaD; arginine decarboxylase [EC:4.1.1.19]
K02634	0.201909	0.202647	0.0506618	0.186451	0.687697	0.171924	0.0002	0.000320744	petA; apocytochrome f
K02635	0.20585	0.20755	0.0518874	0.232654	0.811308	0.202827	0.0008	0.001267	petB; cytochrome b6
K02637	0.148887	0.170633	0.0426583	0.12726	0.477727	0.119432	0.0007	0.001162	petD; cytochrome b6-f complex subunit 4
K02638	0.00979444	0.0231032	0.00577579	0.0663096	0.0954656	0.0238664	0.0143	0.0199697	petE; plastocyanin
K02639	0.150643	0.340712	0.0851781	0.000716125	0.0028645	0.000716125	0.0007	0.00121037	petF; ferredoxin
K02640	0.13131	0.137945	0.0344861	0.135914	0.517403	0.129351	0.0016	0.00249279	petG; cytochrome b6-f complex subunit 5
K02650	9.09697	9.76083	2.44021	6.89479	5.24638	1.3116	0.8211	0.832007	pilA; type IV pilus assembly protein PilA
K02651	13.7871	5.3222	1.33055	11.5132	5.34219	1.33555	0.2278	0.251576	flp, pilA; pilus assembly protein Flp/PilA
K02657	0.0510132	0.0634579	0.0158645	0.0649575	0.0842559	0.021064	0.798	0.810476	pilG; twitching motility two-component system response regulator PilG
K02658	0.0554135	0.0844703	0.0211176	0.120556	0.146389	0.0365972	0.0674	0.0820523	pilH; twitching motility two-component system response regulator PilH
K02659	0.00391306	0.0156522	0.00391306	0.0501802	0.0642859	0.0160715	0.0003	0.000486289	pilI; twitching motility protein PilI
K02660	0.0157128	0.0155872	0.0038968	0.0669401	0.085285	0.0213213	0.0129	0.0180314	pilJ; twitching motility protein PilJ
K02667	0.0133118	0.0174025	0.00435063	0.0671637	0.0883123	0.0220781	0.0406	0.0513034	pilR, pehR; two-component system, NtrC family, response regulator PilR
K02668	0.0190185	0.0180511	0.00451277	0.0600959	0.0855778	0.0213945	0.1951	0.21714	pilS, pehS; two-component system, NtrC family, sensor histidine kinase PilS [EC:2.7.13.3]
K02683	4.78478	7.26523	1.81631	4.93899	1.74927	0.437317	0.0317	0.0410843	priS, pri1, priA; DNA primase small subunit [EC:2.7.7.102]
K02684	7.34148	5.9162	1.47905	0.0511741	0.153792	0.0384481	<.0001	5.38599e-06	PRI1; DNA primase small subunit [EC:2.7.7.102]
K02685	5.8737	4.3696	1.0924	0.0161373	0.0570211	0.0142553	<.0001	5.38599e-06	PRI2; DNA primase large subunit
K02686	0.055311	0.0671851	0.0167963	0.16255	0.495868	0.123967	0.7503	0.763489	priB; primosomal replication protein N
K02689	0.148772	0.127743	0.0319357	0.199028	0.730558	0.182639	0.0001	0.000227739	psaA; photosystem I P700 chlorophyll a apoprotein A1
K02690	0.183229	0.15096	0.0377401	0.211198	0.75321	0.188302	<.0001	0.00013093	psaB; photosystem I P700 chlorophyll a apoprotein A2
K02691	0.0978114	0.135231	0.0338077	0.109039	0.389777	0.0974441	0.0024	0.00366572	psaC; photosystem I subunit VII
K02697	0.049449	0.114259	0.0285648	0.0453838	0.166991	0.0417479	0.1062	0.123592	psaJ; photosystem I subunit IX
K02703	0.246112	0.192987	0.0482467	0.192524	0.629194	0.157299	0.0002	0.000438649	psbA; photosystem II P680 reaction center D1 protein [EC:1.10.3.9]
K02704	0.217331	0.218046	0.0545116	0.208194	0.725924	0.181481	0.0001	0.000197621	psbB; photosystem II CP47 chlorophyll apoprotein
K02705	0.178932	0.200841	0.0502103	0.173921	0.600762	0.150191	0.0004	0.000762554	psbC; photosystem II CP43 chlorophyll apoprotein
K02706	0.211498	0.163918	0.0409795	0.190664	0.681888	0.170472	0.0004	0.000762554	psbD; photosystem II P680 reaction center D2 protein [EC:1.10.3.9]
K02707	0.0954325	0.111728	0.027932	0.0919961	0.340374	0.0850935	0.0028	0.00425698	psbE; photosystem II cytochrome b559 subunit alpha
K02709	0.073536	0.0708775	0.0177194	0.0905961	0.308408	0.077102	0.0198	0.026684	psbH; photosystem II PsbH protein
K02710	0.0327015	0.0524364	0.0131091	0.0131195	0.052478	0.0131195	0.1026	0.119922	psbI; photosystem II PsbI protein
K02712	0.181521	0.16315	0.0407874	0.138552	0.498378	0.124594	<.0001	0.000128814	psbK; photosystem II PsbK protein
K02725	17.6275	14.3325	3.58312	0.00152125	0.006085	0.00152125	<.0001	5.38599e-06	PSMA1; 20S proteasome subunit alpha 6 [EC:3.4.25.1]
K02726	14.4515	11.8547	2.96368	0.007233	0.0117528	0.0029382	<.0001	5.38599e-06	PSMA2; 20S proteasome subunit alpha 2 [EC:3.4.25.1]
K02727	10.5924	8.71994	2.17999	0	0	0	<.0001	5.38599e-06	PSMA3; 20S proteasome subunit alpha 7 [EC:3.4.25.1]
K02728	13.2364	11.5348	2.88369	0.00548231	0.0138759	0.00346898	<.0001	5.38599e-06	PSMA4; 20S proteasome subunit alpha 3 [EC:3.4.25.1]
K02729	2.92934	3.8479	0.961976	0	0	0	<.0001	9.87573e-06	PSMA5; 20S proteasome subunit alpha 5 [EC:3.4.25.1]
K02730	17.4097	13.597	3.39926	0.00407306	0.0144686	0.00361716	<.0001	5.38599e-06	PSMA6; 20S proteasome subunit alpha 1 [EC:3.4.25.1]
K02732	14.6809	11.9531	2.98826	0.00154213	0.0061685	0.00154213	<.0001	5.38599e-06	PSMB1; 20S proteasome subunit beta 6 [EC:3.4.25.1]
K02734	15.5314	12.3283	3.08208	0.00485731	0.0137244	0.0034311	<.0001	5.38599e-06	PSMB2; 20S proteasome subunit beta 4 [EC:3.4.25.1]
K02735	14.2297	11.5234	2.88085	0.0120315	0.0268235	0.00670588	<.0001	5.38599e-06	PSMB3; 20S proteasome subunit beta 3 [EC:3.4.25.1]
K02736	18.0008	14.6356	3.65889	0.00473706	0.0102918	0.00257296	<.0001	5.38599e-06	PSMB4; 20S proteasome subunit beta 7 [EC:3.4.25.1]
K02744	0.121477	0.163554	0.0408886	7.16305	5.82793	1.45698	<.0001	5.38599e-06	agaF; N-acetylgalactosamine PTS system EIIA component [EC:2.7.1.-]
K02745	0.0295051	0.0751393	0.0187848	5.24357	4.86898	1.21724	<.0001	5.38599e-06	agaV; N-acetylgalactosamine PTS system EIIB component [EC:2.7.1.-]
K02746	0	0	0	4.65783	4.63915	1.15979	<.0001	5.38599e-06	agaW; N-acetylgalactosamine PTS system EIIC component
K02747	0.0408208	0.0760588	0.0190147	6.07795	6.65021	1.66255	<.0001	5.38599e-06	agaE; N-acetylgalactosamine PTS system EIID component
K02750	2.08056	2.4412	0.6103	0.327068	0.704182	0.176046	0.0015	0.00246344	glvC, malP, aglA; alpha-glucoside PTS system EIICB component [EC:2.7.1.208 2.7.1.-]
K02753	0.00184806	0.00472182	0.00118046	0.15298	0.573568	0.143392	0.2867	0.313185	ascF; beta-glucoside (arbutin/salicin/cellobiose) PTS system EIICB component [EC:2.7.1.-]
K02757	2.55688	1.23766	0.309415	3.05314	3.35404	0.838511	0.5977	0.617294	bglF, bglP; beta-glucoside PTS system EIICBA component [EC:2.7.1.-]
K02759	3.32233	2.36395	0.590987	5.43727	3.9077	0.976924	0.0648	0.0790027	celC, chbA; cellobiose PTS system EIIA component [EC:2.7.1.196 2.7.1.205]
K02760	4.53286	2.16892	0.542229	11.2998	7.66387	1.91597	0.0004	0.000691974	celA, chbB; cellobiose PTS system EIIB component [EC:2.7.1.196 2.7.1.205]
K02761	1.92747	1.15683	0.289208	4.84366	3.56542	0.891356	0.002	0.0031379	celB, chbC; cellobiose PTS system EIIC component
K02768	10.6339	3.92121	0.980303	4.85504	3.72263	0.930659	<.0001	0.00013093	fruB; fructose PTS system EIIA component [EC:2.7.1.202]
K02769	0.252962	0.268785	0.0671963	0.364482	0.355911	0.0889778	0.3859	0.407501	fruAb; fructose PTS system EIIB component [EC:2.7.1.202]
K02770	14.091	5.47166	1.36792	7.1571	2.29871	0.574677	0.0001	0.000232838	fruA; fructose PTS system EIIBC or EIIC component [EC:2.7.1.202]
K02773	1.08566	0.584484	0.146121	1.11068	0.712671	0.178168	0.763	0.775886	gatA, sgcA; galactitol PTS system EIIA component [EC:2.7.1.200]
K02774	1.19632	0.695901	0.173975	1.46746	0.846488	0.211622	0.2913	0.316677	gatB, sgcB; galactitol PTS system EIIB component [EC:2.7.1.200]
K02775	46.2443	16.285	4.07125	13.9757	5.87157	1.46789	<.0001	5.38599e-06	gatC, sgcC; galactitol PTS system EIIC component
K02777	0.425014	0.326714	0.0816785	5.96254	2.29143	0.572858	<.0001	5.38599e-06	crr; sugar PTS system EIIA component [EC:2.7.1.-]
K02779	0.000759313	0.00303725	0.000759313	0.129775	0.491689	0.122922	0.1361	0.156287	ptsG; glucose PTS system EIICB or EIICBA component [EC:2.7.1.199]
K02781	2.92751	2.63293	0.658231	1.5439	0.916044	0.229011	0.0973	0.113712	srlB; glucitol/sorbitol PTS system EIIA component [EC:2.7.1.198]
K02782	3.49764	2.44254	0.610636	3.10398	1.8324	0.4581	0.8211	0.832007	srlE; glucitol/sorbitol PTS system EIIB component [EC:2.7.1.198]
K02783	2.25277	1.48266	0.370664	2.57156	1.62012	0.40503	0.4739	0.495769	srlA; glucitol/sorbitol PTS system EIIC component
K02784	57.0854	13.9736	3.49341	165.888	16.6843	4.17108	<.0001	5.38599e-06	ptsH; phosphocarrier protein HPr
K02786	0.219897	0.290274	0.0725684	0.549161	0.828878	0.207219	0.0237	0.03148	lacF; lactose PTS system EIIA component [EC:2.7.1.207]
K02788	0.104031	0.122678	0.0306696	0.5944	0.686533	0.171633	0.0001	0.000232838	lacE; lactose PTS system EIICB component [EC:2.7.1.207]
K02791	1.19092	0.837276	0.209319	1.94278	1.10931	0.277328	0.0159	0.021941	malX; maltose/glucose PTS system EIICB component [EC:2.7.1.199 2.7.1.208]
K02793	1.49181	0.923154	0.230788	2.38326	0.739268	0.184817	0.0033	0.00499536	manXa; mannose PTS system EIIA component [EC:2.7.1.191]
K02794	1.01773	0.783726	0.195931	0.688152	0.60388	0.15097	0.1223	0.141063	manX; mannose PTS system EIIAB component [EC:2.7.1.191]
K02795	1.5595	1.08285	0.270713	3.42442	2.42529	0.606323	0.0026	0.00395853	manY; mannose PTS system EIIC component
K02796	1.02174	0.718737	0.179684	2.03165	1.48705	0.371763	0.0033	0.00499536	manZ; mannose PTS system EIID component
K02798	0	0	0	0.00895887	0.0358355	0.00895887	0.3173	0.339304	cmtB; mannitol PTS system EIIA component [EC:2.7.1.197]
K02800	8.59607	4.56019	1.14005	8.94152	5.19488	1.29872	0.8505	0.859459	mtlA, cmtA; mannitol PTS system EIICBA or EIICB component [EC:2.7.1.197]
K02804	0.538377	1.08626	0.271565	1.24483	1.88431	0.471078	0.1134	0.131454	nagE; N-acetylglucosamine PTS system EIICBA or EIICB component [EC:2.7.1.193]
K02806	0.326059	0.237704	0.059426	0.764664	0.527073	0.131768	0.0075	0.0108475	ptsN; nitrogen PTS system EIIA component [EC:2.7.1.-]
K02810	5.81293	2.56	0.64	3.82718	1.6564	0.4141	0.0176	0.0238336	scrA, sacP, sacX, ptsS; sucrose PTS system EIIBCA or EIIBC component [EC:2.7.1.211]
K02819	2.30559	1.34843	0.337107	2.27345	1.95994	0.489986	0.407	0.428762	treB, treP; trehalose PTS system EIIBC or EIIBCA component [EC:2.7.1.201]
K02821	2.424	1.12075	0.280188	3.96517	1.94276	0.485689	0.0075	0.0108475	ulaC, sgaA; ascorbate PTS system EIIA or EIIAB component [EC:2.7.1.194]
K02822	3.28364	1.32554	0.331386	3.29836	1.12343	0.280857	0.9399	0.943884	ulaB, sgaB; ascorbate PTS system EIIB component [EC:2.7.1.194]
K02823	150.82	33.585	8.39626	224.562	28.1864	7.0466	<.0001	1.95324e-05	pyrDII; dihydroorotate dehydrogenase electron transfer subunit
K02825	33.5376	8.93989	2.23497	50.1342	11.336	2.83399	0.0001	0.00026839	pyrR; pyrimidine operon attenuation protein / uracil phosphoribosyltransferase [EC:2.4.2.9]
K02826	0	0	0	0.0180901	0.0723603	0.0180901	0.3173	0.339304	qoxA; cytochrome aa3-600 menaquinol oxidase subunit II [EC:7.1.1.5]
K02828	0	0	0	0.0245221	0.0904086	0.0226022	0.0737	0.087769	qoxC; cytochrome aa3-600 menaquinol oxidase subunit III [EC:7.1.1.5]
K02829	0	0	0	0.0218896	0.0875583	0.0218896	0.3173	0.339304	qoxD; cytochrome aa3-600 menaquinol oxidase subunit IV [EC:7.1.1.5]
K02840	0	0	0	0.0315321	0.126128	0.0315321	0.3173	0.339304	waaB, rfaB; UDP-D-galactose:(glucosyl)LPS alpha-1,6-D-galactosyltransferase [EC:2.4.1.-]
K02841	6.01158	2.55533	0.638832	4.39035	2.64558	0.661395	0.0973	0.113712	waaC, rfaC; heptosyltransferase I [EC:2.4.-.-]
K02843	2.51798	3.96038	0.990094	2.13034	4.84908	1.21227	0.05	0.0620713	waaF, rfaF; heptosyltransferase II [EC:2.4.-.-]
K02844	0.0952982	0.144306	0.0360764	0.332228	0.901886	0.225472	0.4705	0.492939	waaG, rfaG; UDP-glucose:(heptosyl)LPS alpha-1,3-glucosyltransferase [EC:2.4.1.-]
K02847	61.5059	20.4272	5.10679	46.6449	21.9691	5.49227	0.0288	0.0376366	waaL, rfaL; O-antigen ligase [EC:2.4.1.-]
K02848	0.260717	0.23799	0.0594975	0.30416	0.873881	0.21847	0.0157	0.0217949	waaP, rfaP; heptose I phosphotransferase [EC:2.7.1.-]
K02849	0	0	0	0.223845	0.860045	0.215011	0.0171	0.0233006	waaQ, rfaQ; heptosyltransferase III [EC:2.4.-.-]
K02850	0	0	0	0.310248	1.15028	0.287569	0.0079	0.0113948	waaY, rfaY; heptose II phosphotransferase [EC:2.7.1.-]
K02851	141.768	33.9473	8.48683	154.167	22.7487	5.68718	0.3089	0.334345	wecA, tagO, rfe; UDP-GlcNAc:undecaprenyl-phosphate/decaprenyl-phosphate GlcNAc-1-phosphate transferase [EC:2.7.8.33 2.7.8.35]
K02858	1.12748	1.65811	0.414529	1.95362	1.65184	0.412961	0.0195	0.0261937	ribB, RIB3; 3,4-dihydroxy 2-butanone 4-phosphate synthase [EC:4.1.99.12]
K02863	273.005	42.152	10.538	358.734	21.8685	5.46712	<.0001	7.9474e-06	RP-L1, MRPL1, rplA; large subunit ribosomal protein L1
K02864	253.892	40.7133	10.1783	345.725	14.4974	3.62436	<.0001	5.38599e-06	RP-L10, MRPL10, rplJ; large subunit ribosomal protein L10
K02865	12.9331	9.77374	2.44344	0.0388904	0.0782956	0.0195739	<.0001	5.38599e-06	RP-L10Ae, RPL10A; large subunit ribosomal protein L10Ae
K02866	38.5699	30.1867	7.54666	4.62208	1.68527	0.421317	0.0001	0.000232838	RP-L10e, RPL10; large subunit ribosomal protein L10e
K02867	237.779	33.9412	8.48529	324.32	17.2997	4.32491	<.0001	5.38599e-06	RP-L11, MRPL11, rplK; large subunit ribosomal protein L11
K02868	34.7507	27.8076	6.95189	0.0852254	0.106313	0.0265781	<.0001	5.38599e-06	RP-L11e, RPL11; large subunit ribosomal protein L11e
K02869	2.12714	2.93787	0.734467	2.53554	1.01856	0.254639	0.0176	0.0238336	RP-L12, rpl12; large subunit ribosomal protein L12
K02870	34.6571	27.8895	6.97236	0.000984375	0.0039375	0.000984375	<.0001	5.38599e-06	RP-L12e, RPL12; large subunit ribosomal protein L12e
K02871	221.366	37.568	9.392	294.99	19.4895	4.87238	<.0001	9.18181e-06	RP-L13, MRPL13, rplM; large subunit ribosomal protein L13
K02872	32.8251	25.7615	6.44037	0.0137272	0.0198404	0.0049601	<.0001	5.38599e-06	RP-L13Ae, RPL13A; large subunit ribosomal protein L13Ae
K02873	31.7052	26.0509	6.51273	0.17535	0.157699	0.0394247	<.0001	5.38599e-06	RP-L13e, RPL13; large subunit ribosomal protein L13e
K02874	202.717	31.5833	7.89583	275.01	15.5038	3.87595	<.0001	5.38599e-06	RP-L14, MRPL14, rplN; large subunit ribosomal protein L14
K02875	24.5925	19.8621	4.96552	4.05544	2.14076	0.535189	0.0003	0.000531645	RP-L14e, RPL14; large subunit ribosomal protein L14e
K02876	231.175	37.6037	9.40093	312.499	16.4755	4.11888	<.0001	5.38599e-06	RP-L15, MRPL15, rplO; large subunit ribosomal protein L15
K02877	23.7996	18.0289	4.50723	4.59253	1.30514	0.326284	0.0012	0.00193808	RP-L15e, RPL15; large subunit ribosomal protein L15e
K02878	214.274	37.3984	9.34959	288.727	19.6073	4.90182	<.0001	1.04859e-05	RP-L16, MRPL16, rplP; large subunit ribosomal protein L16
K02879	233.18	35.9971	8.99927	323.232	14.8835	3.72087	<.0001	5.38599e-06	RP-L17, MRPL17, rplQ; large subunit ribosomal protein L17
K02880	33.8213	26.8176	6.70439	0.156338	0.186853	0.0467132	<.0001	5.38599e-06	RP-L17e, RPL17; large subunit ribosomal protein L17e
K02881	210.894	29.9995	7.49988	283.273	14.1951	3.54878	<.0001	5.38599e-06	RP-L18, MRPL18, rplR; large subunit ribosomal protein L18
K02882	36.2527	30.1815	7.54538	0.0327209	0.0558379	0.0139595	<.0001	5.38599e-06	RP-L18Ae, RPL18A; large subunit ribosomal protein L18Ae
K02883	49.1793	38.0543	9.51358	4.46727	1.32239	0.330597	<.0001	6.40768e-05	RP-L18e, RPL18; large subunit ribosomal protein L18e
K02884	198.685	34.3002	8.57506	262.177	17.1072	4.27681	<.0001	1.42253e-05	RP-L19, MRPL19, rplS; large subunit ribosomal protein L19
K02885	34.1615	25.9941	6.49852	4.53693	1.74776	0.436941	0.0002	0.000310146	RP-L19e, RPL19; large subunit ribosomal protein L19e
K02886	257.044	43.0054	10.7513	340.136	26.9639	6.74097	<.0001	1.66322e-05	RP-L2, MRPL2, rplB; large subunit ribosomal protein L2
K02887	190.492	32.0948	8.0237	276.8	18.2686	4.56714	<.0001	5.38599e-06	RP-L20, MRPL20, rplT; large subunit ribosomal protein L20
K02888	170.323	30.6431	7.66078	243.158	14.6528	3.66321	<.0001	6.88093e-06	RP-L21, MRPL21, rplU; large subunit ribosomal protein L21
K02889	34.4905	26.5085	6.62711	4.91786	1.67053	0.417632	0.0002	0.000355129	RP-L21e, RPL21; large subunit ribosomal protein L21e
K02890	220.103	32.3466	8.08666	299.405	13.9529	3.48822	<.0001	5.38599e-06	RP-L22, MRPL22, rplV; large subunit ribosomal protein L22
K02891	0	0	0	0.115374	0.163042	0.0407605	0.0006	0.00105344	RP-L22e, RPL22; large subunit ribosomal protein L22e
K02892	206.596	34.7785	8.69462	293.964	10.9831	2.74578	<.0001	5.38599e-06	RP-L23, MRPL23, rplW; large subunit ribosomal protein L23
K02893	0.00121531	0.00486125	0.00121531	0.0677401	0.0976516	0.0244129	0.0044	0.00651776	RP-L23Ae, RPL23A; large subunit ribosomal protein L23Ae
K02894	17.8289	13.9109	3.47772	0.00259244	0.0103698	0.00259244	<.0001	5.38599e-06	RP-L23e, RPL23; large subunit ribosomal protein L23e
K02895	191.86	29.3031	7.32577	244.276	10.8841	2.72103	<.0001	7.9474e-06	RP-L24, MRPL24, rplX; large subunit ribosomal protein L24
K02896	28.5977	21.1583	5.28958	2.0719	0.706414	0.176604	<.0001	4.78987e-05	RP-L24e, RPL24; large subunit ribosomal protein L24e
K02897	133.735	29.608	7.402	75.6443	24.272	6.06799	<.0001	5.56604e-05	RP-L25, rplY; large subunit ribosomal protein L25
K02899	147.575	24.1845	6.04614	188.469	11.6391	2.90978	<.0001	1.42253e-05	RP-L27, MRPL27, rpmA; large subunit ribosomal protein L27
K02900	22.0396	17.6886	4.42215	0.0394313	0.064407	0.0161017	<.0001	5.38599e-06	RP-L27Ae, RPL27A; large subunit ribosomal protein L27Ae
K02901	36.7762	29.0049	7.25123	0.0124782	0.0244174	0.00610436	<.0001	5.38599e-06	RP-L27e, RPL27; large subunit ribosomal protein L27e
K02902	126.692	19.8918	4.97295	139.101	11.1085	2.77714	0.0704	0.0854759	RP-L28, MRPL28, rpmB; large subunit ribosomal protein L28
K02903	10.2822	8.64274	2.16069	0	0	0	<.0001	5.38599e-06	RP-L28e, RPL28; large subunit ribosomal protein L28e
K02904	77.1374	17.5368	4.3842	172.127	14.9049	3.72623	<.0001	5.38599e-06	RP-L29, rpmC; large subunit ribosomal protein L29
K02905	11.7253	9.14673	2.28668	0.00236425	0.009457	0.00236425	<.0001	5.38599e-06	RP-L29e, RPL29; large subunit ribosomal protein L29e
K02906	274.382	42.0792	10.5198	355.424	23.8262	5.95654	<.0001	1.21479e-05	RP-L3, MRPL3, rplC; large subunit ribosomal protein L3
K02907	69.9624	11.2094	2.80234	100.183	7.67166	1.91792	<.0001	5.99662e-06	RP-L30, MRPL30, rpmD; large subunit ribosomal protein L30
K02908	26.6943	20.5216	5.13041	3.95732	1.45237	0.363092	0.0008	0.00132396	RP-L30e, RPL30; large subunit ribosomal protein L30e
K02909	125.565	21.2272	5.3068	159.399	14.7549	3.68873	<.0001	8.51833e-05	RP-L31, rpmE; large subunit ribosomal protein L31
K02910	27.815	21.4177	5.35443	4.9695	2.24198	0.560496	0.0005	0.00079122	RP-L31e, RPL31; large subunit ribosomal protein L31e
K02911	82.1164	11.1575	2.78937	106.86	7.21491	1.80373	<.0001	7.9474e-06	RP-L32, MRPL32, rpmF; large subunit ribosomal protein L32
K02912	22.5512	17.5459	4.38649	3.89277	1.17714	0.294284	0.002	0.0031379	RP-L32e, RPL32; large subunit ribosomal protein L32e
K02913	79.7168	12.8516	3.21289	88.0539	8.52194	2.13049	0.1223	0.141063	RP-L33, MRPL33, rpmG; large subunit ribosomal protein L33
K02914	24.5164	5.43932	1.35983	30.7049	5.42326	1.35582	0.0075	0.0108475	RP-L34, MRPL34, rpmH; large subunit ribosomal protein L34
K02915	30.7104	23.3144	5.82861	2.80416	1.12807	0.282018	<.0001	9.82894e-05	RP-L34e, RPL34; large subunit ribosomal protein L34e
K02916	95.303	17.7415	4.43538	146.346	4.89162	1.2229	<.0001	5.38599e-06	RP-L35, MRPL35, rpmI; large subunit ribosomal protein L35
K02917	22.4068	17.415	4.35375	0.00592781	0.013539	0.00338475	<.0001	5.38599e-06	RP-L35Ae, RPL35A; large subunit ribosomal protein L35Ae
K02918	23.5371	18.2148	4.5537	0.0362297	0.0664372	0.0166093	<.0001	5.38599e-06	RP-L35e, RPL35; large subunit ribosomal protein L35e
K02919	4.48122	2.1472	0.5368	7.64993	1.69241	0.423103	0.0002	0.000408403	RP-L36, MRPL36, rpmJ; large subunit ribosomal protein L36
K02920	16.3136	13.3674	3.34184	0.00192644	0.00770575	0.00192644	<.0001	5.38599e-06	RP-L36e, RPL36; large subunit ribosomal protein L36e
K02921	21.8002	16.5733	4.14333	2.58826	0.919497	0.229874	0.0002	0.000355129	RP-L37Ae, RPL37A; large subunit ribosomal protein L37Ae
K02922	17.8605	13.8348	3.45871	1.0386	0.509921	0.12748	<.0001	2.64595e-05	RP-L37e, RPL37; large subunit ribosomal protein L37e
K02923	8.27626	6.6423	1.66057	0.02169	0.0386154	0.00965386	<.0001	5.38599e-06	RP-L38e, RPL38; large subunit ribosomal protein L38e
K02924	1.68116	2.76081	0.690202	2.09618	0.844584	0.211146	0.0033	0.00499536	RP-L39e, RPL39; large subunit ribosomal protein L39e
K02925	24.7014	20.4072	5.1018	0.0494847	0.0700471	0.0175118	<.0001	5.38599e-06	RP-L3e, RPL3; large subunit ribosomal protein L3e
K02926	275.373	46.4795	11.6199	377.28	17.8795	4.46989	<.0001	5.38599e-06	RP-L4, MRPL4, rplD; large subunit ribosomal protein L4
K02929	24.9934	21.5504	5.38761	3.67878	1.29558	0.323895	0.0005	0.000904344	RP-L44e, RPL44; large subunit ribosomal protein L44e
K02930	18.3142	13.883	3.47076	5.24721	1.79668	0.44917	0.0067	0.00977542	RP-L4e, RPL4; large subunit ribosomal protein L4e
K02931	268.828	43.3037	10.8259	379.04	20.4172	5.1043	<.0001	5.38599e-06	RP-L5, MRPL5, rplE; large subunit ribosomal protein L5
K02932	9.43909	7.05955	1.76489	0.00569675	0.0106043	0.00265107	<.0001	5.38599e-06	RP-L5e, RPL5; large subunit ribosomal protein L5e
K02933	264.734	39.2334	9.80835	350.588	18.1549	4.53872	<.0001	5.38599e-06	RP-L6, MRPL6, rplF; large subunit ribosomal protein L6
K02934	29.1875	24.3795	6.09487	0.0103013	0.0284288	0.00710721	<.0001	5.38599e-06	RP-L6e, RPL6; large subunit ribosomal protein L6e
K02935	190.164	35.8173	8.95432	256.539	13.6212	3.40531	<.0001	9.18181e-06	RP-L7, MRPL12, rplL; large subunit ribosomal protein L7/L12
K02936	30.6688	22.9266	5.73165	3.46814	1.37326	0.343315	<.0001	0.000112898	RP-L7Ae, RPL7A; large subunit ribosomal protein L7Ae
K02937	46.6284	36.9391	9.23476	0.00495712	0.015235	0.00380875	<.0001	5.38599e-06	RP-L7e, RPL7; large subunit ribosomal protein L7e
K02938	37.0438	30.0811	7.52028	0.0128787	0.0136018	0.00340046	<.0001	5.38599e-06	RP-L8e, RPL8; large subunit ribosomal protein L8e
K02939	208.938	31.1602	7.79004	304.811	14.6904	3.6726	<.0001	5.38599e-06	RP-L9, MRPL9, rplI; large subunit ribosomal protein L9
K02940	0.551075	0.554601	0.13865	0.0416243	0.0850107	0.0212527	<.0001	3.26508e-05	RP-L9e, RPL9; large subunit ribosomal protein L9e
K02941	14.5855	14.8181	3.70452	0.00351056	0.00754885	0.00188721	<.0001	5.38599e-06	RP-LP0, RPLP0; large subunit ribosomal protein LP0
K02942	7.90419	6.91283	1.72821	0.0054655	0.021862	0.0054655	<.0001	5.38599e-06	RP-LP1, RPLP1; large subunit ribosomal protein LP1
K02943	0	0	0	0.0334102	0.124106	0.0310264	0.1508	0.170457	RP-LP2, RPLP2; large subunit ribosomal protein LP2
K02944	3.03648	4.54227	1.13557	3.0864	1.04826	0.262065	0.0288	0.0376366	RP-LX, rplX; large subunit ribosomal protein LX
K02945	283.726	49.267	12.3168	409.203	12.5549	3.13872	<.0001	5.38599e-06	RP-S1, rpsA; small subunit ribosomal protein S1
K02946	198.145	33.2564	8.31409	279.415	12.951	3.23774	<.0001	5.38599e-06	RP-S10, MRPS10, rpsJ; small subunit ribosomal protein S10
K02948	198.763	32.5945	8.14862	258.185	16.3329	4.08322	<.0001	7.9474e-06	RP-S11, MRPS11, rpsK; small subunit ribosomal protein S11
K02949	36.0305	29.7369	7.43423	0.0359084	0.0506919	0.012673	<.0001	5.38599e-06	RP-S11e, RPS11; small subunit ribosomal protein S11e
K02950	206.219	29.9839	7.49598	277.506	19.8148	4.95371	<.0001	9.18181e-06	RP-S12, MRPS12, rpsL; small subunit ribosomal protein S12
K02951	14.8077	12.0518	3.01296	0.00122313	0.0048925	0.00122313	<.0001	5.38599e-06	RP-S12e, RPS12; small subunit ribosomal protein S12e
K02952	218.339	31.4464	7.86161	297.875	16.5563	4.13907	<.0001	5.38599e-06	RP-S13, rpsM; small subunit ribosomal protein S13
K02953	30.8283	24.1822	6.04554	0.00740469	0.0160619	0.00401548	<.0001	5.38599e-06	RP-S13e, RPS13; small subunit ribosomal protein S13e
K02954	130.297	23.0581	5.76454	147.844	10.3699	2.59248	0.0458	0.0572048	RP-S14, MRPS14, rpsN; small subunit ribosomal protein S14
K02955	24.6336	21.5549	5.38874	0.0228964	0.0278458	0.00696144	<.0001	5.38599e-06	RP-S14e, RPS14; small subunit ribosomal protein S14e
K02956	162.597	24.9065	6.22662	233.308	14.4188	3.60471	<.0001	5.38599e-06	RP-S15, MRPS15, rpsO; small subunit ribosomal protein S15
K02957	32.0665	26.2978	6.57444	0.0595028	0.108653	0.0271631	<.0001	5.38599e-06	RP-S15Ae, RPS15A; small subunit ribosomal protein S15Ae
K02958	19.0706	14.9766	3.74416	0.00568419	0.01227	0.0030675	<.0001	5.38599e-06	RP-S15e, RPS15; small subunit ribosomal protein S15e
K02959	181.285	29.4074	7.35186	207.463	10.4032	2.6008	0.0037	0.00558518	RP-S16, MRPS16, rpsP; small subunit ribosomal protein S16
K02960	29.9771	24.5969	6.14923	0.0132444	0.0227959	0.00569898	<.0001	5.38599e-06	RP-S16e, RPS16; small subunit ribosomal protein S16e
K02961	188.869	32.2039	8.05097	254.613	10.0408	2.51019	<.0001	5.99662e-06	RP-S17, MRPS17, rpsQ; small subunit ribosomal protein S17
K02962	25.3168	20.3485	5.08713	2.31141	0.824044	0.206011	<.0001	0.000112898	RP-S17e, RPS17; small subunit ribosomal protein S17e
K02963	148.899	25.6852	6.42129	210.559	14.8481	3.71203	<.0001	5.99662e-06	RP-S18, MRPS18, rpsR; small subunit ribosomal protein S18
K02964	27.3356	19.9853	4.99633	0.0442306	0.0951112	0.0237778	<.0001	5.38599e-06	RP-S18e, RPS18; small subunit ribosomal protein S18e
K02965	196.932	32.6974	8.17435	246.155	12.2342	3.05855	<.0001	7.34758e-05	RP-S19, rpsS; small subunit ribosomal protein S19
K02966	31.6086	24.2537	6.06341	5.05752	1.62633	0.406582	0.0004	0.000691974	RP-S19e, RPS19; small subunit ribosomal protein S19e
K02967	271.126	43.8022	10.9506	381.889	19.3639	4.84097	<.0001	5.38599e-06	RP-S2, MRPS2, rpsB; small subunit ribosomal protein S2
K02968	161.841	24.7104	6.17759	243.439	13.3501	3.33753	<.0001	5.38599e-06	RP-S20, rpsT; small subunit ribosomal protein S20
K02969	27.073	22.3013	5.57532	0.00189481	0.00757925	0.00189481	<.0001	5.38599e-06	RP-S20e, RPS20; small subunit ribosomal protein S20e
K02970	116.678	22.6556	5.6639	137.097	11.7025	2.92562	0.0116	0.0163213	RP-S21, MRPS21, rpsU; small subunit ribosomal protein S21
K02971	10.3172	8.81816	2.20454	0	0	0	<.0001	5.38599e-06	RP-S21e, RPS21; small subunit ribosomal protein S21e
K02973	26.7445	23.1122	5.77804	0.013389	0.0290769	0.00726921	<.0001	5.38599e-06	RP-S23e, RPS23; small subunit ribosomal protein S23e
K02974	28.6804	22.737	5.68424	3.6162	1.15738	0.289345	<.0001	0.000175964	RP-S24e, RPS24; small subunit ribosomal protein S24e
K02975	19.7461	14.3778	3.59444	0.00306869	0.00892781	0.00223195	<.0001	5.38599e-06	RP-S25e, RPS25; small subunit ribosomal protein S25e
K02976	33.8918	27.0284	6.75711	0.00994988	0.020636	0.005159	<.0001	5.38599e-06	RP-S26e, RPS26; small subunit ribosomal protein S26e
K02977	0	0	0	0.0286844	0.0728488	0.0182122	0.0079	0.0113948	RP-S27Ae, RPS27A; small subunit ribosomal protein S27Ae
K02978	14.0873	11.1966	2.79916	1.84006	0.633005	0.158251	<.0001	0.000175964	RP-S27e, RPS27; small subunit ribosomal protein S27e
K02979	7.4771	5.51812	1.37953	1.90277	0.656504	0.164126	0.0053	0.00785151	RP-S28e, RPS28; small subunit ribosomal protein S28e
K02980	4.89859	3.83656	0.95914	0.0210549	0.0483143	0.0120786	<.0001	5.38599e-06	RP-S29e, RPS29; small subunit ribosomal protein S29e
K02981	10.9787	8.91834	2.22958	0.00403856	0.0161542	0.00403856	<.0001	5.38599e-06	RP-S2e, RPS2; small subunit ribosomal protein S2e
K02982	270.915	40.1238	10.031	373.036	21.6222	5.40554	<.0001	5.38599e-06	RP-S3, rpsC; small subunit ribosomal protein S3
K02983	0.439405	0.439683	0.109921	0.00496288	0.0198515	0.00496288	<.0001	5.63354e-05	RP-S30e, RPS30; small subunit ribosomal protein S30e
K02984	38.583	29.6268	7.40671	5.53361	1.95012	0.487529	0.0002	0.000310146	RP-S3Ae, RPS3A; small subunit ribosomal protein S3Ae
K02985	11.6751	9.4121	2.35302	0.0580048	0.072061	0.0180152	<.0001	5.38599e-06	RP-S3e, RPS3; small subunit ribosomal protein S3e
K02986	264.147	38.8066	9.70165	382.7	19.1596	4.7899	<.0001	5.38599e-06	RP-S4, rpsD; small subunit ribosomal protein S4
K02987	51.0754	40.584	10.146	6.96825	2.25635	0.564087	0.0003	0.000608085	RP-S4e, RPS4; small subunit ribosomal protein S4e
K02988	216.266	35.3021	8.82552	283.847	21.308	5.32699	<.0001	3.0485e-05	RP-S5, MRPS5, rpsE; small subunit ribosomal protein S5
K02989	79.6508	64.974	16.2435	0.00563262	0.0124826	0.00312064	<.0001	5.38599e-06	RP-S5e, RPS5; small subunit ribosomal protein S5e
K02990	213.561	37.4937	9.37342	289.867	17.0681	4.26702	<.0001	7.9474e-06	RP-S6, MRPS6, rpsF; small subunit ribosomal protein S6
K02991	35.9047	27.1822	6.79556	4.29444	1.3869	0.346726	<.0001	0.000112898	RP-S6e, RPS6; small subunit ribosomal protein S6e
K02992	252.484	36.5967	9.14917	339.466	11.5652	2.8913	<.0001	5.38599e-06	RP-S7, MRPS7, rpsG; small subunit ribosomal protein S7
K02993	39.2541	31.928	7.982	0.0523492	0.0740866	0.0185216	<.0001	5.38599e-06	RP-S7e, RPS7; small subunit ribosomal protein S7e
K02994	249.451	37.7783	9.44457	343.336	18.3953	4.59883	<.0001	5.38599e-06	RP-S8, rpsH; small subunit ribosomal protein S8
K02995	39.2581	29.2459	7.31147	3.66006	1.23472	0.30868	<.0001	5.56604e-05	RP-S8e, RPS8; small subunit ribosomal protein S8e
K02996	200.469	30.4521	7.61303	265.845	19.1638	4.79096	<.0001	6.88093e-06	RP-S9, MRPS9, rpsI; small subunit ribosomal protein S9
K02997	37.0935	29.6465	7.41162	0.0421833	0.107914	0.0269785	<.0001	5.38599e-06	RP-S9e, RPS9; small subunit ribosomal protein S9e
K02998	14.7383	11.9302	2.98254	0.00456313	0.0182525	0.00456313	<.0001	5.38599e-06	RP-SAe, RPSA; small subunit ribosomal protein SAe
K02999	1.55969	1.22648	0.306621	0.000737937	0.00225483	0.000563707	<.0001	5.38599e-06	RPA1, POLR1A; DNA-directed RNA polymerase I subunit RPA1 [EC:2.7.7.6]
K03000	1.77303	1.42827	0.357067	0.0301916	0.0762375	0.0190594	<.0001	8.07809e-06	RPA12, ZNRD1; DNA-directed RNA polymerase I subunit RPA12
K03002	4.39131	3.80138	0.950344	0.000945688	0.00203339	0.000508348	<.0001	5.38599e-06	RPA2, POLR1B; DNA-directed RNA polymerase I subunit RPA2 [EC:2.7.7.6]
K03004	0	0	0	0.00887212	0.0354885	0.00887212	0.3173	0.339304	RPA43; DNA-directed RNA polymerase I subunit RPA43
K03005	2.7128	2.17967	0.544917	0	0	0	<.0001	5.38599e-06	RPA49, POLR1E; DNA-directed RNA polymerase I subunit RPA49
K03006	8.57041	6.39459	1.59865	0.00180119	0.0027182	0.000679551	<.0001	5.38599e-06	RPB1, POLR2A; DNA-directed RNA polymerase II subunit RPB1 [EC:2.7.7.6]
K03007	0.945316	1.09356	0.273389	0	0	0	<.0001	9.87573e-06	RPB10, POLR2L; DNA-directed RNA polymerases I, II, and III subunit RPABC5
K03008	6.20154	4.94799	1.237	0	0	0	<.0001	5.38599e-06	RPB11, POLR2J; DNA-directed RNA polymerase II subunit RPB11
K03009	0	0	0	0.0238247	0.0361796	0.00904491	0.0079	0.0113948	RPB12, POLR2K; DNA-directed RNA polymerases I, II, and III subunit RPABC4
K03010	11.6902	9.29795	2.32449	0.00215956	0.00438156	0.00109539	<.0001	5.38599e-06	RPB2, POLR2B; DNA-directed RNA polymerase II subunit RPB2 [EC:2.7.7.6]
K03011	9.92454	7.73716	1.93429	0	0	0	<.0001	5.38599e-06	RPB3, POLR2C; DNA-directed RNA polymerase II subunit RPB3
K03012	0.852338	0.855596	0.213899	0	0	0	<.0001	5.38599e-06	RPB4, POLR2D; DNA-directed RNA polymerase II subunit RPB4
K03013	9.32587	7.84563	1.96141	0.023932	0.0837037	0.0209259	<.0001	5.38599e-06	RPB5, POLR2E; DNA-directed RNA polymerases I, II, and III subunit RPABC1
K03014	6.80969	5.40457	1.35114	0.00406144	0.0162457	0.00406144	<.0001	5.38599e-06	RPB6, POLR2F; DNA-directed RNA polymerases I, II, and III subunit RPABC2
K03015	0.617577	0.590205	0.147551	0	0	0	<.0001	9.87573e-06	RPB7, POLR2G; DNA-directed RNA polymerase II subunit RPB7
K03016	6.16514	4.86652	1.21663	0.0198817	0.0531529	0.0132882	<.0001	5.38599e-06	RPB8, POLR2H; DNA-directed RNA polymerases I, II, and III subunit RPABC3
K03017	4.02509	3.31457	0.828643	0.00302669	0.00830464	0.00207616	<.0001	5.38599e-06	RPB9, POLR2I; DNA-directed RNA polymerase II subunit RPB9
K03018	3.69076	3.33894	0.834735	0.000913	0.00264911	0.000662278	<.0001	5.38599e-06	RPC1, POLR3A; DNA-directed RNA polymerase III subunit RPC1 [EC:2.7.7.6]
K03019	0.918445	0.840091	0.210023	0.0291056	0.061436	0.015359	<.0001	5.20876e-05	RPC11, POLR3K; DNA-directed RNA polymerase III subunit RPC11
K03020	1.13754	1.06833	0.267082	0	0	0	<.0001	5.38599e-06	RPC19, POLR1D; DNA-directed RNA polymerases I and III subunit RPAC2
K03021	3.79877	3.0305	0.757625	0.000289125	0.0011565	0.000289125	<.0001	5.38599e-06	RPC2, POLR3B; DNA-directed RNA polymerase III subunit RPC2 [EC:2.7.7.6]
K03022	2.33006	1.85362	0.463404	0.0217847	0.0547973	0.0136993	<.0001	5.38599e-06	RPC8, POLR3H; DNA-directed RNA polymerase III subunit RPC8
K03023	1.49431	1.46598	0.366496	0	0	0	<.0001	5.38599e-06	RPC3, POLR3C; DNA-directed RNA polymerase III subunit RPC3
K03025	3.82642	3.26312	0.815779	0.0228121	0.0603576	0.0150894	<.0001	5.38599e-06	RPC6, POLR3F; DNA-directed RNA polymerase III subunit RPC6
K03026	2.75682	2.24538	0.561345	0	0	0	<.0001	5.38599e-06	RPC4, POLR3D; DNA-directed RNA polymerase III subunit RPC4
K03027	4.78005	3.81782	0.954456	0.00153656	0.00614625	0.00153656	<.0001	5.38599e-06	RPC40, POLR1C; DNA-directed RNA polymerases I and III subunit RPAC1
K03028	18.8274	14.5498	3.63745	0.00295506	0.00630046	0.00157511	<.0001	5.38599e-06	PSMD2, RPN1; 26S proteasome regulatory subunit N1
K03029	10.6315	8.58216	2.14554	0.0387276	0.0633521	0.015838	<.0001	5.38599e-06	PSMD4, RPN10; 26S proteasome regulatory subunit N10
K03030	11.7919	9.18909	2.29727	0.00178912	0.00497856	0.00124464	<.0001	5.38599e-06	PSMD14, RPN11, POH1; 26S proteasome regulatory subunit N11
K03031	12.5336	9.72756	2.43189	0.00302544	0.00975111	0.00243778	<.0001	5.38599e-06	PSMD8, RPN12; 26S proteasome regulatory subunit N12
K03032	6.00703	4.45696	1.11424	0.000918312	0.00205476	0.000513689	<.0001	5.38599e-06	PSMD1, RPN2; 26S proteasome regulatory subunit N2
K03033	11.199	8.93795	2.23449	0.010031	0.0273661	0.00684151	<.0001	5.38599e-06	PSMD3, RPN3; 26S proteasome regulatory subunit N3
K03035	9.24689	7.42408	1.85602	0.0565321	0.143011	0.0357526	<.0001	5.38599e-06	PSMD12, RPN5; 26S proteasome regulatory subunit N5
K03036	8.44022	6.46594	1.61649	0.0136033	0.0401485	0.0100371	<.0001	5.38599e-06	PSMD11, RPN6; 26S proteasome regulatory subunit N6
K03037	9.38722	7.59188	1.89797	0.00297337	0.00974726	0.00243681	<.0001	5.38599e-06	PSMD6, RPN7; 26S proteasome regulatory subunit N7
K03038	10.1127	7.42465	1.85616	0	0	0	<.0001	5.38599e-06	PSMD7, RPN8; 26S proteasome regulatory subunit N8
K03039	10.9426	8.91487	2.22872	0.019113	0.0410926	0.0102731	<.0001	5.38599e-06	PSMD13, RPN9; 26S proteasome regulatory subunit N9
K03040	358.094	56.5488	14.1372	511.865	27.2402	6.81005	<.0001	5.38599e-06	rpoA; DNA-directed RNA polymerase subunit alpha [EC:2.7.7.6]
K03041	5.5866	8.75957	2.18989	5.45341	1.82128	0.455319	0.0382	0.0482745	rpoA1; DNA-directed RNA polymerase subunit A' [EC:2.7.7.6]
K03042	5.29071	8.47618	2.11905	5.58008	2.04571	0.511427	0.0237	0.03148	rpoA2; DNA-directed RNA polymerase subunit A" [EC:2.7.7.6]
K03043	317.574	53.7864	13.4466	409.922	28.6008	7.15019	<.0001	1.66322e-05	rpoB; DNA-directed RNA polymerase subunit beta [EC:2.7.7.6]
K03044	4.69754	8.14732	2.03683	4.82484	1.81285	0.453213	0.0262	0.0344475	rpoB1; DNA-directed RNA polymerase subunit B' [EC:2.7.7.6]
K03045	2.50329	2.75086	0.687715	4.08278	1.54522	0.386304	0.0009	0.00150255	rpoB2; DNA-directed RNA polymerase subunit B" [EC:2.7.7.6]
K03046	277.337	51.1234	12.7808	335.896	31.1552	7.78879	0.0009	0.00150255	rpoC; DNA-directed RNA polymerase subunit beta' [EC:2.7.7.6]
K03047	5.76808	8.66567	2.16642	6.09094	1.96684	0.49171	0.0195	0.0261937	rpoD; DNA-directed RNA polymerase subunit D [EC:2.7.7.6]
K03048	32.2826	11.8271	2.95677	34.6038	15.8532	3.9633	0.9699	0.971137	rpoE; DNA-directed RNA polymerase subunit delta
K03049	4.6085	7.14217	1.78554	4.87363	1.6981	0.424525	0.0176	0.0238336	rpoE1; DNA-directed RNA polymerase subunit E' [EC:2.7.7.6]
K03051	4.76727	7.8712	1.9678	5.05192	1.4567	0.364175	0.0075	0.0108475	rpoF; DNA-directed RNA polymerase subunit F [EC:2.7.7.6]
K03053	1.95277	2.15022	0.537555	2.4033	0.890976	0.222744	0.0195	0.0261937	rpoH; DNA-directed RNA polymerase subunit H [EC:2.7.7.6]
K03055	0.611394	0.808065	0.202016	1.35092	0.524457	0.131114	0.0002	0.000355129	rpoK; DNA-directed RNA polymerase subunit K [EC:2.7.7.6]
K03056	3.0769	5.32567	1.33142	3.42623	1.24434	0.311085	0.0067	0.00977542	rpoL; DNA-directed RNA polymerase subunit L [EC:2.7.7.6]
K03058	0.00831788	0.0242013	0.00605032	0.0143536	0.0220023	0.00550057	0.2309	0.254898	rpoN; DNA-directed RNA polymerase subunit N [EC:2.7.7.6]
K03059	0	0	0	0.003931	0.015724	0.003931	0.3173	0.339304	rpoP; DNA-directed RNA polymerase subunit P [EC:2.7.7.6]
K03060	58.3502	11.9276	2.98191	138.569	14.8742	3.71856	<.0001	5.38599e-06	rpoZ; DNA-directed RNA polymerase subunit omega [EC:2.7.7.6]
K03061	7.20991	5.53649	1.38412	0	0	0	<.0001	5.38599e-06	PSMC2, RPT1; 26S proteasome regulatory subunit T1
K03062	4.71516	3.63112	0.907779	0.00203988	0.0081595	0.00203988	<.0001	5.38599e-06	PSMC1, RPT2; 26S proteasome regulatory subunit T2
K03063	6.08192	4.64168	1.16042	0.0181926	0.0657004	0.0164251	<.0001	5.38599e-06	PSMC4, RPT3; 26S proteasome regulatory subunit T3
K03064	7.08083	5.93148	1.48287	0.00252544	0.0058134	0.00145335	<.0001	5.38599e-06	PSMC6, RPT4; 26S proteasome regulatory subunit T4
K03065	6.25421	4.93014	1.23253	0.0161264	0.0477619	0.0119405	<.0001	5.38599e-06	PSMC3, RPT5; 26S proteasome regulatory subunit T5
K03066	9.02211	6.93909	1.73477	0.00418206	0.00982301	0.00245575	<.0001	5.38599e-06	PSMC5, RPT6; 26S proteasome regulatory subunit T6
K03070	335.676	52.5132	13.1283	498.212	36.6228	9.15569	<.0001	5.38599e-06	secA; preprotein translocase subunit SecA [EC:7.4.2.8]
K03071	15.2165	7.37203	1.84301	30.1783	10.8265	2.70662	0.0003	0.000531645	secB; preprotein translocase subunit SecB
K03072	7.35841	4.18376	1.04594	7.32648	5.57343	1.39336	0.6511	0.668781	secD; preprotein translocase subunit SecD
K03073	142.598	24.7988	6.19971	238.533	17.2543	4.31358	<.0001	5.38599e-06	secE; preprotein translocase subunit SecE
K03074	7.36751	3.73637	0.934093	5.76441	3.7688	0.942201	0.1051	0.122388	secF; preprotein translocase subunit SecF
K03075	164.012	27.1787	6.79468	202.838	11.1054	2.77635	<.0001	1.66322e-05	secG; preprotein translocase subunit SecG
K03076	320.234	46.3496	11.5874	438.97	25.6268	6.4067	<.0001	5.38599e-06	secY; preprotein translocase subunit SecY
K03077	115.634	27.2996	6.8249	84.89	12.5015	3.12538	0.0014	0.00219027	araD, ulaF, sgaE, sgbE; L-ribulose-5-phosphate 4-epimerase [EC:5.1.3.4]
K03078	0.151864	0.236269	0.0590672	0.334586	1.10503	0.276258	0.5062	0.527656	ulaD, sgaH, sgbH; 3-dehydro-L-gulonate-6-phosphate decarboxylase [EC:4.1.1.85]
K03079	8.26225	3.09945	0.774863	81.1445	23.2217	5.80542	<.0001	5.38599e-06	ulaE, sgaU, sgbU; L-ribulose-5-phosphate 3-epimerase [EC:5.1.3.22]
K03087	0.000546938	0.00218775	0.000546938	0.145218	0.556627	0.139157	0.1211	0.139958	rpoS; RNA polymerase nonessential primary-like sigma factor
K03092	171.779	35.5619	8.89047	116.701	34.3742	8.59354	0.0003	0.000608085	rpoN; RNA polymerase sigma-54 factor
K03094	199.087	155.577	38.8942	0.188032	0.217208	0.0543019	<.0001	5.38599e-06	SKP1, CBF3D; S-phase kinase-associated protein 1
K03097	27.3138	21.5887	5.39717	0.000703	0.002812	0.000703	<.0001	5.38599e-06	CSNK2A; casein kinase II subunit alpha [EC:2.7.11.1]
K03100	357.336	68.3136	17.0784	526.253	36.861	9.21526	<.0001	5.99662e-06	lepB; signal peptidase I [EC:3.4.21.89]
K03101	237.879	39.0914	9.77286	343.365	15.8413	3.96033	<.0001	5.38599e-06	lspA; signal peptidase II [EC:3.4.23.36]
K03104	3.35439	2.94474	0.736185	0	0	0	<.0001	5.38599e-06	SRP14; signal recognition particle subunit SRP14
K03105	5.34072	5.42154	1.35539	3.31822	1.23103	0.307758	0.1521	0.171147	SRP19; signal recognition particle subunit SRP19
K03106	266.563	36.2268	9.0567	342.235	31.0912	7.77279	<.0001	1.66322e-05	SRP54, ffh; signal recognition particle subunit SRP54 [EC:3.6.5.4]
K03107	4.45213	3.48459	0.871148	0.0614357	0.164634	0.0411584	<.0001	6.90924e-06	SRP68; signal recognition particle subunit SRP68
K03108	1.8835	1.7927	0.448175	0	0	0	<.0001	5.38599e-06	SRP72; signal recognition particle subunit SRP72
K03110	233.667	37.2538	9.31346	306.536	22.8445	5.71112	<.0001	1.21479e-05	ftsY; fused signal recognition particle receptor
K03111	699.499	170.948	42.7371	871.548	188.45	47.1125	0.0075	0.0108475	ssb; single-strand DNA-binding protein
K03113	51.5278	9.15705	2.28926	44.5203	17.3536	4.33839	0.0648	0.0790027	EIF1, SUI1; translation initiation factor 1
K03115	57.0611	44.7219	11.1805	0.14331	0.229777	0.0574443	<.0001	5.38599e-06	CSNK2B; casein kinase II subunit beta
K03116	87.0538	15.4659	3.86648	48.7586	15.5845	3.89613	<.0001	3.0485e-05	tatA; sec-independent protein translocase protein TatA
K03117	2.73329	0.92397	0.230993	8.00462	3.6156	0.903899	<.0001	1.04859e-05	tatB; sec-independent protein translocase protein TatB
K03118	165.364	31.4699	7.86748	98.8532	35.0461	8.76153	0.0001	0.000232838	tatC; sec-independent protein translocase protein TatC
K03119	0	0	0	0.133587	0.525928	0.131482	0.1508	0.170457	tauD; taurine dioxygenase [EC:1.14.11.17]
K03120	47.3931	35.6648	8.91619	6.76382	1.97337	0.493342	0.0005	0.00079122	TBP, tbp; transcription initiation factor TFIID TATA-box-binding protein
K03122	2.322	2.51417	0.628543	0	0	0	<.0001	5.38599e-06	TFIIA1, GTF2A1, TOA1; transcription initiation factor TFIIA large subunit
K03123	4.66543	3.81159	0.952898	0	0	0	<.0001	5.38599e-06	TFIIA2, GTF2A2, TOA2; transcription initiation factor TFIIA small subunit
K03124	11.1155	12.7457	3.18644	10.3868	3.70829	0.927072	0.3271	0.348789	TFIIB, GTF2B, SUA7, tfb; transcription initiation factor TFIIB
K03130	4.43746	3.51913	0.879784	0.463554	1.67044	0.417611	<.0001	3.10202e-05	TAF5; transcription initiation factor TFIID subunit 5
K03131	2.23993	1.99362	0.498406	0.0254814	0.0699498	0.0174874	<.0001	5.38599e-06	TAF6; transcription initiation factor TFIID subunit 6
K03132	4.22925	3.03332	0.75833	0.00129144	0.00516575	0.00129144	<.0001	5.38599e-06	TAF7; transcription initiation factor TFIID subunit 7
K03133	0.479834	0.559437	0.139859	0.00078475	0.003139	0.00078475	<.0001	5.63138e-06	TAF9B, TAF9; transcription initiation factor TFIID subunit 9B
K03135	2.41059	1.92024	0.48006	0	0	0	<.0001	5.38599e-06	TAF11; transcription initiation factor TFIID subunit 11
K03136	3.8556	4.34643	1.08661	4.87971	1.72543	0.431359	0.0042	0.00625546	TFIIE1, GTF2E1, TFA1, tfe; transcription initiation factor TFIIE subunit alpha
K03139	0.110055	0.14302	0.0357551	0.0161819	0.0647278	0.0161819	0.0042	0.0062346	TFIIF2, GTF2F2, TFG2; transcription initiation factor TFIIF subunit beta [EC:3.6.4.12]
K03142	0	0	0	0.0846014	0.101777	0.0254441	<.0001	2.65607e-05	TFIIH2, GTF2H2, SSL1; transcription initiation factor TFIIH subunit 2
K03143	0	0	0	0.0204241	0.0465335	0.0116334	0.0737	0.087769	TFIIH3, GTF2H3, TFB4; transcription initiation factor TFIIH subunit 3
K03144	0.0882829	0.157212	0.039303	0	0	0	0.0006	0.00105344	TFIIH4, GTF2H4, TFB2; transcription initiation factor TFIIH subunit 4
K03147	48.9469	17.3353	4.33382	78.0933	20.6439	5.16099	0.0003	0.000608085	thiC; phosphomethylpyrimidine synthase [EC:4.1.99.17]
K03148	0	0	0	0.111912	0.431979	0.107995	0.1508	0.170457	thiF; sulfur carrier protein ThiS adenylyltransferase [EC:2.7.7.73]
K03149	25.273	14.2559	3.56396	79.6102	13.9568	3.48921	<.0001	9.18181e-06	thiG; thiazole synthase [EC:2.8.1.10]
K03150	111.817	31.9048	7.97619	226.42	30.7357	7.68393	<.0001	6.88093e-06	thiH; 2-iminoacetate synthase [EC:4.1.99.19]
K03151	121.086	21.6422	5.41055	297.4	36.7088	9.17719	<.0001	5.38599e-06	thiI; tRNA uracil 4-sulfurtransferase [EC:2.8.1.4]
K03153	0.0336759	0.0196497	0.00491242	0.162645	0.185866	0.0464665	0.0039	0.0059145	thiO; glycine oxidase [EC:1.4.3.19]
K03154	37.7742	11.9934	2.99835	49.7768	6.72065	1.68016	0.0009	0.00150255	thiS; sulfur carrier protein
K03164	20.48	12.3291	3.08228	0.505953	0.618202	0.15455	<.0001	5.38599e-06	TOP2; DNA topoisomerase II [EC:5.6.2.2]
K03165	7.97386	6.42473	1.60618	0.00249987	0.00581145	0.00145286	<.0001	5.38599e-06	TOP3; DNA topoisomerase III [EC:5.6.2.1]
K03179	6.23856	4.60576	1.15144	10.5828	7.22573	1.80643	0.0143	0.0199165	ubiA; 4-hydroxybenzoate polyprenyltransferase [EC:2.5.1.39]
K03181	4.91138	7.97008	1.99252	5.2763	2.87087	0.717717	0.0546	0.0671479	ubiC; chorismate--pyruvate lyase [EC:4.1.3.40]
K03182	4.8558	3.64964	0.912411	9.68925	8.01038	2.0026	0.0215	0.028733	ubiD; 4-hydroxy-3-polyprenylbenzoate decarboxylase [EC:4.1.1.98]
K03183	99.4385	24.3205	6.08012	54.6784	18.5392	4.6348	<.0001	9.82894e-05	ubiE; demethylmenaquinone methyltransferase / 2-methoxy-6-polyprenyl-1,4-benzoquinol methylase [EC:2.1.1.163 2.1.1.201]
K03184	0	0	0	0.143371	0.545861	0.136465	0.0171	0.0233006	ubiF; 3-demethoxyubiquinol 3-hydroxylase [EC:1.14.99.60]
K03185	0.0159717	0.0143739	0.00359348	0.248082	0.508458	0.127114	<.0001	1.42024e-05	ubiH; 2-octaprenyl-6-methoxyphenol hydroxylase [EC:1.14.13.-]
K03186	12.8399	6.63923	1.65981	14.7799	6.36529	1.59132	0.1632	0.183051	ubiX, bsdB, PAD1; flavin prenyltransferase [EC:2.5.1.129]
K03191	0.987012	0.531329	0.132832	1.61683	1.56435	0.391087	0.3657	0.387168	ureI; acid-activated urea channel
K03194	0.402177	0.601742	0.150436	1.18507	2.46975	0.617438	0.1632	0.183051	virB1; type IV secretion system protein VirB1
K03195	0.229223	0.595491	0.148873	0.350312	0.270005	0.0675013	0.0018	0.00278261	virB10, lvhB10; type IV secretion system protein VirB10
K03196	0.34182	0.616441	0.15411	0.334984	0.215099	0.0537747	0.0215	0.028733	virB11, lvhB11; type IV secretion system protein VirB11 [EC:7.4.2.8]
K03197	0.0375476	0.0441558	0.0110389	0.211409	0.245663	0.0614158	0.0038	0.00568481	virB2, lvhB2; type IV secretion system protein VirB2
K03198	0.110885	0.269804	0.0674511	0.113681	0.137535	0.0343839	0.1306	0.150521	virB3, lvhB3; type IV secretion system protein VirB3
K03199	0.390274	0.842496	0.210624	0.33436	0.303563	0.0758906	0.0262	0.0344475	virB4, lvhB4; type IV secretion system protein VirB4 [EC:7.4.2.8]
K03200	0.245246	0.704438	0.17611	0.125863	0.212321	0.0530803	0.4362	0.457826	virB5, lvhB5; type IV secretion system protein VirB5
K03201	1.56277	2.53805	0.634512	1.17801	0.794474	0.198619	0.1317	0.151366	virB6, lvhB6; type IV secretion system protein VirB6
K03202	0	0	0	0.0384816	0.0744043	0.0186011	0.0079	0.0113948	virB7, lvhB7; type IV secretion system protein VirB7
K03203	0.36879	0.77954	0.194885	0.374722	0.378993	0.0947483	0.0176	0.0238336	virB8, lvhB8; type IV secretion system protein VirB8
K03204	0.558888	1.10422	0.276056	0.45839	0.377773	0.0944432	0.0704	0.0854759	virB9, lvhB9; type IV secretion system protein VirB9
K03205	471.399	91.7569	22.9392	944.532	120.855	30.2137	<.0001	5.38599e-06	virD4, lvhD4; type IV secretion system protein VirD4 [EC:7.4.2.8]
K03210	167.409	31.1695	7.79237	215.634	7.69677	1.92419	<.0001	6.88093e-06	yajC; preprotein translocase subunit YajC
K03217	321.342	51.3975	12.8494	464.437	27.0952	6.77379	<.0001	5.38599e-06	yidC, spoIIIJ, OXA1, ccfA; YidC/Oxa1 family membrane protein insertase
K03219	0	0	0	0.295775	0.379181	0.0947953	<.0001	9.87573e-06	yscC, sctC, ssaC; type III secretion protein C
K03221	0.313665	0.346107	0.0865268	0.251687	0.778478	0.19462	0.0092	0.0132581	yscF, sctF, ssaG, prgI; type III secretion protein F
K03222	0.811748	0.685445	0.171361	0.54443	0.785244	0.196311	0.0262	0.0344475	yscJ, sctJ, hrcJ, ssaJ; type III secretion protein J
K03223	0.482704	0.50557	0.126392	0.66399	0.92935	0.232338	0.8211	0.832007	yscL, sctL; type III secretion protein L
K03224	0.567259	0.504219	0.126055	0.359701	0.503699	0.125925	0.0348	0.0448219	yscN, sctN, hrcN, ssaN; ATP synthase in type III secretion protein N [EC:7.4.2.8]
K03225	0.445712	0.674215	0.168554	0.792126	0.942547	0.235637	0.0704	0.0854759	yscQ, sctQ, hrcQ, ssaQ, spaO; type III secretion protein Q
K03226	0.936714	0.796147	0.199037	0.658138	0.815916	0.203979	0.0765	0.0905693	yscR, sctR, hrcR, ssaR; type III secretion protein R
K03227	0.65501	0.46932	0.11733	0.470424	0.792337	0.198084	0.0143	0.0199165	yscS, sctS, hrcS, ssaS; type III secretion protein S
K03228	0.440267	0.348211	0.0870526	0.668914	0.68277	0.170693	0.3089	0.334345	yscT, sctT, hrcT, ssaT; type III secretion protein T
K03229	0.80426	0.849337	0.212334	0.407571	0.708441	0.17711	0.0067	0.00977542	yscU, sctU, hrcU, ssaU; type III secretion protein U
K03230	0.556871	0.639226	0.159806	0.364627	0.431913	0.107978	0.2913	0.316677	yscV, sctV, hrcV, ssaV, invA; type III secretion protein V
K03231	32.5415	25.3591	6.33976	5.052	2.00094	0.500234	0.0007	0.00116369	EEF1A; elongation factor 1-alpha
K03233	34.4133	26.4774	6.61935	0.00843637	0.0164192	0.0041048	<.0001	5.38599e-06	EEF1G; elongation factor 1-gamma
K03234	44.3143	35.1627	8.79069	0.0101614	0.011294	0.00282351	<.0001	5.38599e-06	EEF2; elongation factor 2
K03236	13.6945	10.5981	2.64952	3.40599	1.07595	0.268989	0.0033	0.00499536	EIF1A; translation initiation factor 1A
K03237	19.8973	15.889	3.97225	6.22986	2.05427	0.513567	0.0104	0.0147395	EIF2S1; translation initiation factor 2 subunit 1
K03238	11.8343	10.2849	2.57123	4.76763	1.74382	0.435954	0.0215	0.028733	EIF2S2; translation initiation factor 2 subunit 2
K03240	3.87342	3.4607	0.865175	0.000847813	0.00236004	0.000590011	<.0001	5.38599e-06	EIF2B5; translation initiation factor eIF-2B subunit epsilon
K03242	26.9161	21.5242	5.38106	5.97705	1.89047	0.472619	0.0029	0.00444714	EIF2S3; translation initiation factor 2 subunit 3
K03243	15.1403	12.5926	3.14815	6.491	2.13359	0.533398	0.0195	0.0261937	EIF5B; translation initiation factor 5B
K03246	8.17897	6.71354	1.67838	0.00255769	0.0102308	0.00255769	<.0001	5.38599e-06	EIF3I; translation initiation factor 3 subunit I
K03251	0.763316	0.96548	0.24137	0	0	0	<.0001	5.38599e-06	EIF3D; translation initiation factor 3 subunit D
K03252	6.70062	5.54833	1.38708	0.000875375	0.00239386	0.000598466	<.0001	5.38599e-06	EIF3C; translation initiation factor 3 subunit C
K03254	2.15826	1.66999	0.417497	0.00221606	0.00494136	0.00123534	<.0001	5.38599e-06	EIF3A; translation initiation factor 3 subunit A
K03257	0	0	0	0.100558	0.341345	0.0853362	0.0006	0.00105344	EIF4A; translation initiation factor 4A
K03259	138.93	107.531	26.8827	0.204174	0.429923	0.107481	<.0001	5.38599e-06	EIF4E; translation initiation factor 4E
K03262	3.9228	2.86215	0.715538	0.0246691	0.0896119	0.022403	<.0001	5.38599e-06	EIF5; translation initiation factor 5
K03264	19.7184	14.6608	3.66519	6.11868	2.00729	0.501822	0.0129	0.0180314	EIF6; translation initiation factor 6
K03265	24.2631	18.2815	4.57038	6.43737	2.34124	0.585309	0.0026	0.00395853	ETF1, ERF1; peptide chain release factor subunit 1
K03267	13.8945	10.8034	2.70085	0.00375175	0.00624158	0.00156039	<.0001	5.38599e-06	ERF3, GSPT; peptide chain release factor subunit 3
K03269	128.003	31.3324	7.83309	72.0266	20.5297	5.13244	<.0001	7.34758e-05	lpxH; UDP-2,3-diacylglucosamine hydrolase [EC:3.6.1.54]
K03270	133.142	28.1791	7.04476	60.5088	17.5961	4.39903	<.0001	7.9474e-06	kdsC; 3-deoxy-D-manno-octulosonate 8-phosphate phosphatase (KDO 8-P phosphatase) [EC:3.1.3.45]
K03271	72.3355	11.5181	2.87952	97.232	19.3163	4.82908	0.0004	0.000691974	gmhA, lpcA; D-sedoheptulose 7-phosphate isomerase [EC:5.3.1.28]
K03272	6.76342	2.69249	0.673123	15.9769	11.2742	2.81854	0.0006	0.00102927	gmhC, hldE, waaE, rfaE; D-beta-D-heptose 7-phosphate kinase / D-beta-D-heptose 1-phosphate adenosyltransferase [EC:2.7.1.167 2.7.7.70]
K03273	54.4073	14.1507	3.53766	38.0364	12.3329	3.08323	0.0053	0.00785151	gmhB; D-glycero-D-manno-heptose 1,7-bisphosphate phosphatase [EC:3.1.3.82 3.1.3.83]
K03274	16.4149	5.9918	1.49795	21.1426	10.8193	2.70482	0.2913	0.316677	gmhD, rfaD; ADP-L-glycero-D-manno-heptose 6-epimerase [EC:5.1.3.20]
K03275	0	0	0	0.330934	1.26896	0.317241	0.0171	0.0233006	waaO, rfaI; UDP-glucose:(glucosyl)LPS alpha-1,3-glucosyltransferase [EC:2.4.1.-]
K03276	0	0	0	0.0337231	0.134892	0.0337231	0.3173	0.339304	waaR, waaT, rfaJ; UDP-glucose/galactose:(glucosyl)LPS alpha-1,2-glucosyl/galactosyltransferase [EC:2.4.1.-]
K03279	0	0	0	0.589437	1.50006	0.375016	0.0015	0.00242685	waaJ, rfaJ; UDP-glucose:(galactosyl)LPS alpha-1,2-glucosyltransferase [EC:2.4.1.58]
K03283	50.1781	44.4451	11.1113	0.165511	0.304614	0.0761535	<.0001	5.99662e-06	HSPA1s; heat shock 70kDa protein 1/2/6/8
K03330	17.6299	9.41365	2.35341	7.81203	3.58004	0.89501	0.0003	0.000465495	gatE; glutamyl-tRNA(Gln) amidotransferase subunit E [EC:6.3.5.7]
K03332	87.8025	30.1	7.52499	11.3268	8.37058	2.09265	<.0001	5.38599e-06	fruA; fructan beta-fructosidase [EC:3.2.1.80]
K03333	0.00446488	0.00716009	0.00179002	0.0297744	0.0583993	0.0145998	0.0846	0.0996959	choD; cholesterol oxidase [EC:1.1.3.6]
K03335	16.3894	5.04256	1.26064	42.3027	10.742	2.68549	<.0001	7.9474e-06	iolE; inosose dehydratase [EC:4.2.1.44]
K03336	5.48417	2.44219	0.610548	21.7413	9.37896	2.34474	<.0001	1.42253e-05	iolD; 3D-(3,5/4)-trihydroxycyclohexane-1,2-dione acylhydrolase (decyclizing) [EC:3.7.1.22]
K03337	6.69543	1.99626	0.499065	50.2512	15.5373	3.88433	<.0001	5.38599e-06	iolB; 5-deoxy-glucuronate isomerase [EC:5.3.1.30]
K03338	3.98326	1.77712	0.444279	21.339	10.0237	2.50593	<.0001	1.66322e-05	iolC; 5-dehydro-2-deoxygluconokinase [EC:2.7.1.92]
K03340	146.499	32.4988	8.12471	190.308	18.1204	4.53009	0.0002	0.000355129	dapdh; diaminopimelate dehydrogenase [EC:1.4.1.16]
K03341	3.20589	2.45468	0.613669	0.0140394	0.0524148	0.0131037	<.0001	5.38599e-06	SEPSECS; O-phospho-L-seryl-tRNASec:L-selenocysteinyl-tRNA synthase [EC:2.9.1.2]
K03342	2.8748	5.58987	1.39747	0.337999	0.554184	0.138546	0.002	0.0031379	pabBC; para-aminobenzoate synthetase / 4-amino-4-deoxychorismate lyase [EC:2.6.1.85 4.1.3.38]
K03348	3.65053	2.8606	0.715149	0.0131521	0.0381492	0.0095373	<.0001	5.38599e-06	APC1; anaphase-promoting complex subunit 1
K03349	2.05094	1.63683	0.409208	0.000226187	0.00090475	0.000226187	<.0001	5.38599e-06	APC2; anaphase-promoting complex subunit 2
K03350	2.10102	1.82235	0.455586	0.000362562	0.00145025	0.000362562	<.0001	5.38599e-06	APC3, CDC27; anaphase-promoting complex subunit 3
K03353	5.02011	3.93168	0.98292	0.001321	0.005284	0.001321	<.0001	5.38599e-06	APC6, CDC16; anaphase-promoting complex subunit 6
K03355	4.3969	3.3887	0.847175	0.00237575	0.00752648	0.00188162	<.0001	5.38599e-06	APC8, CDC23; anaphase-promoting complex subunit 8
K03357	5.34001	3.95833	0.989583	0	0	0	<.0001	5.38599e-06	APC10, DOC1; anaphase-promoting complex subunit 10
K03358	2.40852	2.11778	0.529444	0.00181675	0.007267	0.00181675	<.0001	5.38599e-06	APC11; anaphase-promoting complex subunit 11
K03361	0.187883	0.389133	0.0972833	0.887086	1.58713	0.396783	0.1585	0.178175	CDC4; F-box and WD-40 domain protein CDC4
K03364	9.38176	7.43397	1.85849	0.000610312	0.00244125	0.000610312	<.0001	5.38599e-06	CDH1; cell division cycle 20-like protein 1, cofactor of APC complex
K03365	4.5666	8.27354	2.06838	4.28816	1.63466	0.408664	0.0317	0.0410843	FCY1; cytosine/creatinine deaminase [EC:3.5.4.1 3.5.4.21]
K03366	0.0648217	0.0602063	0.0150516	0.598892	0.37942	0.094855	<.0001	3.52558e-05	butA, budC; meso-butanediol dehydrogenase / (S,S)-butanediol dehydrogenase / diacetyl reductase [EC:1.1.1.- 1.1.1.76 1.1.1.304]
K03367	1.85284	1.22418	0.306046	2.21548	2.0293	0.507326	1	1	dltA; D-alanine--poly(phosphoribitol) ligase subunit 1 [EC:6.1.1.13]
K03379	0.122642	0.0506686	0.0126671	0.624205	0.634275	0.158569	<.0001	1.04859e-05	chnB; cyclohexanone monooxygenase [EC:1.14.13.22]
K03381	0.0178138	0.0217799	0.00544498	0.0877246	0.10688	0.0267199	0.0154	0.0213722	catA; catechol 1,2-dioxygenase [EC:1.13.11.1]
K03382	0	0	0	0.588292	0.27836	0.06959	<.0001	5.38599e-06	atzB; hydroxydechloroatrazine ethylaminohydrolase [EC:3.5.4.43]
K03385	77.3854	25.1978	6.29946	18.1381	6.52632	1.63158	<.0001	5.38599e-06	nrfA; nitrite reductase (cytochrome c-552) [EC:1.7.2.2]
K03386	15.1897	9.02025	2.25506	28.1223	12.9964	3.24911	0.0037	0.00558518	PRDX2_4, ahpC; peroxiredoxin (alkyl hydroperoxide reductase subunit C) [EC:1.11.1.15]
K03388	14.7964	7.59305	1.89826	55.515	15.4788	3.86971	<.0001	6.88093e-06	hdrA2; heterodisulfide reductase subunit A2 [EC:1.8.7.3 1.8.98.4 1.8.98.5 1.8.98.6]
K03389	5.07175	7.22898	1.80724	7.71719	2.08293	0.520732	0.0003	0.000465495	hdrB2; heterodisulfide reductase subunit B2 [EC:1.8.7.3 1.8.98.4 1.8.98.5 1.8.98.6]
K03390	30.7429	12.1805	3.04511	36.6285	8.84877	2.21219	0.0704	0.0854759	hdrC2; heterodisulfide reductase subunit C2 [EC:1.8.7.3 1.8.98.4 1.8.98.5 1.8.98.6]
K03392	0.203092	0.183707	0.0459268	0.595528	0.694509	0.173627	0.0014	0.00219027	ACMSD; aminocarboxymuconate-semialdehyde decarboxylase [EC:4.1.1.45]
K03394	34.2201	8.1423	2.03558	9.94948	3.31565	0.828913	<.0001	5.38599e-06	cobI-cbiL; precorrin-2/cobalt-factor-2 C20-methyltransferase [EC:2.1.1.130 2.1.1.151]
K03396	0.0197381	0.0212318	0.00530795	0.077971	0.0895739	0.0223935	0.0154	0.0213722	gfa; S-(hydroxymethyl)glutathione synthase [EC:4.4.1.22]
K03399	7.53185	7.93717	1.98429	3.85605	1.79647	0.449118	0.05	0.0620713	cbiE; cobalt-precorrin-7 (C5)-methyltransferase [EC:2.1.1.289]
K03404	4.77601	2.67062	0.667656	1.922	1.54888	0.38722	0.0002	0.000408403	chlD, bchD; magnesium chelatase subunit D [EC:6.6.1.1]
K03405	8.04064	3.48621	0.871553	3.76255	3.15602	0.789005	0.0004	0.000691974	chlI, bchI; magnesium chelatase subunit I [EC:6.6.1.1]
K03406	616.664	190.047	47.5117	397.044	146.446	36.6115	0.0067	0.00977542	mcp; methyl-accepting chemotaxis protein
K03407	37.4742	13.4113	3.35282	28.8851	10.4469	2.61174	0.0595	0.0728621	cheA; two-component system, chemotaxis family, sensor kinase CheA [EC:2.7.13.3]
K03408	46.2428	15.5455	3.88638	38.1534	13.8575	3.46436	0.1223	0.141063	cheW; purine-binding chemotaxis protein CheW
K03409	20.7627	8.55614	2.13904	5.60418	3.99541	0.998853	<.0001	1.42253e-05	cheX; chemotaxis protein CheX
K03410	25.9928	8.50082	2.12521	18.1655	6.8468	1.7117	0.0116	0.0163213	cheC; chemotaxis protein CheC
K03411	21.2629	6.54586	1.63646	17.6481	5.93863	1.48466	0.1632	0.183051	cheD; chemotaxis protein CheD [EC:3.5.1.44]
K03412	48.3985	15.6724	3.91811	27.0614	8.83238	2.20809	0.0005	0.00079122	cheB; two-component system, chemotaxis family, protein-glutamate methylesterase/glutaminase [EC:3.1.1.61 3.5.1.44]
K03413	30.8993	10.6586	2.66464	36.1538	10.6887	2.67216	0.1871	0.208371	cheY; two-component system, chemotaxis family, chemotaxis protein CheY
K03414	0.524074	0.563583	0.140896	1.43248	3.14078	0.785196	0.083	0.0978632	cheZ; chemotaxis protein CheZ
K03415	30.3171	11.1584	2.78959	24.1989	9.6486	2.41215	0.1521	0.171147	cheV; two-component system, chemotaxis family, chemotaxis protein CheV
K03417	0.0239556	0.0328305	0.00820763	0.306156	0.536928	0.134232	0.0004	0.000653321	prpB; methylisocitrate lyase [EC:4.1.3.30]
K03420	6.40058	9.50386	2.37597	6.8955	2.59567	0.648918	0.0288	0.0376366	psmR; proteasome regulatory subunit
K03421	4.91838	7.24421	1.81105	5.25833	1.84413	0.461032	0.0237	0.03148	mcrC; methyl-coenzyme M reductase subunit C
K03422	5.94964	7.67625	1.91906	5.83094	1.74133	0.435333	0.0899	0.105432	mcrD; methyl-coenzyme M reductase subunit D
K03425	0	0	0	0.0711275	0.28451	0.0711275	0.3173	0.339304	tatE; sec-independent protein translocase protein TatE
K03426	151.636	38.125	9.53125	118.594	17.235	4.30875	0.0104	0.0147395	E3.6.1.22, NUDT12, nudC; NAD+ diphosphatase [EC:3.6.1.22]
K03429	22.0118	9.96583	2.49146	55.2263	12.1309	3.03272	<.0001	9.18181e-06	ugtP; processive 1,2-diacylglycerol beta-glucosyltransferase [EC:2.4.1.315]
K03430	31.5711	10.6244	2.6561	8.01018	6.59532	1.64883	<.0001	1.66322e-05	phnW; 2-aminoethylphosphonate-pyruvate transaminase [EC:2.6.1.37]
K03431	88.3069	17.68	4.41999	205.373	32.5585	8.13963	<.0001	5.38599e-06	glmM; phosphoglucosamine mutase [EC:5.4.2.10]
K03432	4.63316	6.55805	1.63951	4.88205	1.61646	0.404114	0.0262	0.0344475	psmA, prcA; proteasome alpha subunit [EC:3.4.25.1]
K03433	4.67469	6.68004	1.67001	5.08983	1.63342	0.408356	0.0382	0.0482745	psmB, prcB; proteasome beta subunit [EC:3.4.25.1]
K03434	3.49196	2.98974	0.747436	0.0404467	0.0997096	0.0249274	<.0001	5.98208e-06	PIGL; N-acetylglucosaminylphosphatidylinositol deacetylase [EC:3.5.1.89]
K03456	54.5167	41.0918	10.2729	0.00583856	0.00712678	0.0017817	<.0001	5.38599e-06	PPP2R1; serine/threonine-protein phosphatase 2A regulatory subunit A
K03462	8.1324	8.74898	2.18724	21.6931	8.17028	2.04257	0.0001	0.000232838	NAMPT; nicotinamide phosphoribosyltransferase [EC:2.4.2.12]
K03464	0.0161539	0.0256043	0.00640108	0.118159	0.143831	0.0359578	0.0016	0.00255001	catC; muconolactone D-isomerase [EC:5.3.3.4]
K03465	71.4568	21.5263	5.38157	133.382	20.3902	5.09755	<.0001	1.04859e-05	thyX, thy1; thymidylate synthase (FAD) [EC:2.1.1.148]
K03469	113.629	19.2259	4.80647	217.365	25.7524	6.43809	<.0001	5.38599e-06	rnhA, RNASEH1; ribonuclease HI [EC:3.1.26.4]
K03470	233.585	34.8144	8.7036	310.818	22.0049	5.50123	<.0001	1.21479e-05	rnhB; ribonuclease HII [EC:3.1.26.4]
K03471	29.5483	10.0807	2.52019	46.3211	17.4355	4.35888	0.0029	0.00444714	rnhC; ribonuclease HIII [EC:3.1.26.4]
K03472	0.00104875	0.00286625	0.000716563	0.167471	0.656166	0.164041	0.5119	0.533146	epd; D-erythrose 4-phosphate dehydrogenase [EC:1.2.1.72]
K03473	46.1896	12.3075	3.07687	46.24	21.7137	5.42843	0.3461	0.367538	pdxB; erythronate-4-phosphate dehydrogenase [EC:1.1.1.290]
K03474	62.3984	16.7193	4.17983	61.694	24.7127	6.17817	0.451	0.472614	pdxJ; pyridoxine 5-phosphate synthase [EC:2.6.99.2]
K03475	5.59841	2.29139	0.572848	6.16217	2.24755	0.561887	0.3461	0.367538	ulaA, sgaT; ascorbate PTS system EIIC component
K03476	3.21859	1.4949	0.373725	2.86453	0.981813	0.245453	0.8505	0.859459	ulaG; L-ascorbate 6-phosphate lactonase [EC:3.1.1.-]
K03504	0.64155	0.914978	0.228745	0	0	0	<.0001	9.87573e-06	POLD3; DNA polymerase delta subunit 3
K03511	1.8097	1.51899	0.379746	0	0	0	<.0001	5.38599e-06	POLK; DNA polymerase kappa [EC:2.7.7.7]
K03514	27.2733	20.606	5.15149	0.00338288	0.00906171	0.00226543	<.0001	5.38599e-06	PAPD5_7, TRF4; non-canonical poly(A) RNA polymerase PAPD5/7 [EC:2.7.7.19]
K03517	133.223	29.4885	7.37213	150.816	20.5007	5.12516	0.1134	0.131454	nadA; quinolinate synthase [EC:2.5.1.72]
K03523	81.3339	17.9105	4.47762	121.228	15.8525	3.96314	<.0001	2.27944e-05	bioY; biotin transport system substrate-specific component
K03524	195.118	35.1446	8.78615	244.373	15.9651	3.99128	0.0002	0.000355129	birA; BirA family transcriptional regulator, biotin operon repressor / biotin---[acetyl-CoA-carboxylase] ligase [EC:6.3.4.15]
K03525	167.973	29.8583	7.46457	303.902	15.9487	3.98718	<.0001	5.38599e-06	coaX; type III pantothenate kinase [EC:2.7.1.33]
K03526	215.704	38.9779	9.74449	303.854	8.56319	2.1408	<.0001	5.99662e-06	gcpE, ispG; (E)-4-hydroxy-3-methylbut-2-enyl-diphosphate synthase [EC:1.17.7.1 1.17.7.3]
K03527	189.007	31.9023	7.97558	215.257	25.7183	6.42957	0.0317	0.0410843	ispH, lytB; 4-hydroxy-3-methylbut-2-en-1-yl diphosphate reductase [EC:1.17.7.4]
K03531	334.253	63.778	15.9445	366.782	23.9571	5.98928	0.2427	0.267552	ftsZ; cell division protein FtsZ
K03532	0	0	0	0.141261	0.557306	0.139326	0.0359	0.0455167	torC; trimethylamine-N-oxide reductase (cytochrome c), cytochrome c-type subunit TorC
K03533	0	0	0	0.135739	0.508377	0.127094	0.0359	0.0455167	torD; TorA specific chaperone
K03537	4.26309	5.69858	1.42465	2.95208	1.18895	0.297237	1	1	POP5; ribonuclease P/MRP protein subunit POP5 [EC:3.1.26.5]
K03538	6.18191	8.02739	2.00685	4.69215	1.73846	0.434616	0.7063	0.720517	POP4, RPP29; ribonuclease P protein subunit POP4 [EC:3.1.26.5]
K03539	8.20577	8.83907	2.20977	5.72439	1.85505	0.463764	0.3657	0.387168	RPP1, RPP30; ribonuclease P/MRP protein subunit RPP1 [EC:3.1.26.5]
K03540	5.78955	9.1064	2.2766	5.24615	1.63149	0.407872	0.0546	0.0671479	RPR2, RPP21; ribonuclease P protein subunit RPR2 [EC:3.1.26.5]
K03544	321.382	56.3388	14.0847	457.762	17.7144	4.42861	<.0001	5.38599e-06	clpX, CLPX; ATP-dependent Clp protease ATP-binding subunit ClpX
K03550	244.469	37.8166	9.45414	315.883	18.8012	4.70031	<.0001	1.04859e-05	ruvA; holliday junction DNA helicase RuvA [EC:3.6.4.12]
K03551	276.874	45.7984	11.4496	353.982	26.5743	6.64358	<.0001	3.52558e-05	ruvB; holliday junction DNA helicase RuvB [EC:3.6.4.12]
K03553	298.397	53.3708	13.3427	384.959	24.2376	6.05939	<.0001	6.40768e-05	recA; recombination protein RecA
K03555	269.914	49.9187	12.4797	322.181	26.4412	6.6103	0.0026	0.00395853	mutS; DNA mismatch repair protein MutS
K03557	0.674465	1.8828	0.470701	0.147169	0.417944	0.104486	0.0328	0.042502	fis; Fis family transcriptional regulator, factor for inversion stimulation protein
K03563	18.9912	5.81286	1.45322	22.8943	7.50312	1.87578	0.1134	0.131454	csrA; carbon storage regulator
K03566	0.423745	0.191247	0.0478118	2.60585	2.45364	0.613409	<.0001	6.88093e-06	gcvA; LysR family transcriptional regulator, glycine cleavage system transcriptional activator
K03567	0.145848	0.106081	0.0265203	1.09946	1.52334	0.380836	<.0001	4.0984e-05	gcvR; glycine cleavage system transcriptional repressor
K03572	255.514	48.8015	12.2004	314.092	26.4353	6.60882	0.0003	0.000465495	mutL; DNA mismatch repair protein MutL
K03573	43.6276	12.5411	3.13528	29.8623	12.3978	3.09946	0.0003	0.000608085	mutH; DNA mismatch repair protein MutH
K03575	114.931	26.4156	6.60389	138.906	18.2175	4.55438	0.0067	0.00977542	mutY; A/G-specific adenine glycosylase [EC:3.2.2.31]
K03581	175.007	36.3102	9.07755	367.864	58.4345	14.6086	<.0001	5.38599e-06	recD; exodeoxyribonuclease V alpha subunit [EC:3.1.11.5]
K03582	10.3677	6.38821	1.59705	2.48678	6.1624	1.5406	<.0001	6.40768e-05	recB; exodeoxyribonuclease V beta subunit [EC:3.1.11.5]
K03583	11.073	6.88362	1.7209	2.95325	5.76548	1.44137	<.0001	9.82894e-05	recC; exodeoxyribonuclease V gamma subunit [EC:3.1.11.5]
K03584	253.444	44.3835	11.0959	350.265	21.2174	5.30435	<.0001	5.99662e-06	recO; DNA repair protein RecO (recombination protein O)
K03585	229.164	67.6931	16.9233	153.567	56.3627	14.0907	0.0026	0.00395853	acrA, mexA, adeI, smeD, mtrC, cmeA; membrane fusion protein, multidrug efflux system
K03587	20.9753	7.51789	1.87947	26.4846	9.41865	2.35466	0.1134	0.131454	ftsI; cell division protein FtsI (penicillin-binding protein 3) [EC:3.4.16.4]
K03588	74.5226	20.5226	5.13064	235.62	36.2657	9.06644	<.0001	5.38599e-06	ftsW, spoVE; cell division protein FtsW
K03589	246.711	46.3803	11.5951	329.405	18.2789	4.56971	<.0001	1.21479e-05	ftsQ; cell division protein FtsQ
K03590	242.986	39.908	9.977	187.591	31.5862	7.89656	0.0005	0.000904344	ftsA; cell division protein FtsA
K03594	13.6934	4.06005	1.01501	7.85073	3.00697	0.751744	0.0004	0.000691974	bfr; bacterioferritin [EC:1.16.3.1]
K03596	240.168	43.388	10.847	287.722	30.036	7.50899	0.0023	0.00352998	lepA; GTP-binding protein LepA
K03601	240.089	36.3746	9.09366	345.599	23.9679	5.99198	<.0001	5.38599e-06	xseA; exodeoxyribonuclease VII large subunit [EC:3.1.11.6]
K03602	111.944	20.5352	5.13381	173.581	9.9962	2.49905	<.0001	5.38599e-06	xseB; exodeoxyribonuclease VII small subunit [EC:3.1.11.6]
K03606	0.000390312	0.00156125	0.000390312	0.128314	0.470592	0.117648	0.0563	0.0691095	wcaJ; putative colanic acid biosysnthesis UDP-glucose lipid carrier transferase
K03620	2.9199	2.05938	0.514846	1.11297	1.82445	0.456113	0.0002	0.000408403	hyaC; Ni/Fe-hydrogenase 1 B-type cytochrome subunit
K03621	120.076	21.0963	5.27408	268.363	22.2118	5.55295	<.0001	5.38599e-06	plsX; phosphate acyltransferase [EC:2.3.1.274]
K03626	11.2171	8.57942	2.14486	0.0636181	0.0971875	0.0242969	<.0001	5.38599e-06	EGD2, NACA; nascent polypeptide-associated complex subunit alpha
K03628	209.658	38.8725	9.71813	206.135	28.7275	7.18187	0.7063	0.720517	rho; transcription termination factor Rho
K03629	305.236	53.0538	13.2634	504.12	33.1737	8.29343	<.0001	5.38599e-06	recF; DNA replication and repair protein RecF
K03635	4.70888	6.58589	1.64647	5.2309	2.06536	0.516341	0.0129	0.0180314	MOCS2B, moaE; molybdopterin synthase catalytic subunit [EC:2.8.1.12]
K03636	2.44225	0.699446	0.174862	18.032	4.46712	1.11678	<.0001	5.38599e-06	moaD, cysO; sulfur-carrier protein
K03637	23.1334	10.1767	2.54417	44.7964	10.3411	2.58527	<.0001	0.000112898	moaC, CNX3; cyclic pyranopterin monophosphate synthase [EC:4.6.1.17]
K03638	4.04152	6.60565	1.65141	4.88396	1.72594	0.431484	0.0023	0.00352998	moaB; molybdopterin adenylyltransferase [EC:2.7.7.75]
K03639	28.9347	12.7135	3.17837	59.868	15.0164	3.7541	<.0001	6.40768e-05	moaA, CNX2; GTP 3',8-cyclase [EC:4.1.99.22]
K03644	2.80684	3.0242	0.756051	29.8045	15.5139	3.87848	<.0001	5.38599e-06	lipA, LIAS, LIP1, LIP5; lipoyl synthase [EC:2.8.1.8]
K03648	201.281	27.7583	6.93957	194.385	13.8507	3.46266	0.3089	0.334345	UNG, UDG; uracil-DNA glycosylase [EC:3.2.2.27]
K03649	0.0111388	0.0167725	0.00419313	0.194161	0.515186	0.128796	0.1412	0.162066	mug; double-stranded uracil-DNA glycosylase [EC:3.2.2.28]
K03651	63.6416	20.1366	5.03415	93.3687	26.3064	6.57661	0.0059	0.00878567	cpdA; 3',5'-cyclic-AMP phosphodiesterase [EC:3.1.4.53]
K03652	9.51503	3.62892	0.90723	37.9637	10.8488	2.7122	<.0001	5.38599e-06	MPG; DNA-3-methyladenine glycosylase [EC:3.2.2.21]
K03654	220.278	51.7714	12.9428	133.282	26.7756	6.69389	<.0001	9.82894e-05	recQ; ATP-dependent DNA helicase RecQ [EC:3.6.4.12]
K03655	257.072	47.3748	11.8437	335.138	27.0562	6.76406	<.0001	7.34758e-05	recG; ATP-dependent DNA helicase RecG [EC:3.6.4.12]
K03657	409.732	61.1074	15.2769	481.758	32.1752	8.04381	0.0007	0.00116369	uvrD, pcrA; DNA helicase II / ATP-dependent DNA helicase PcrA [EC:3.6.4.12]
K03660	74.8304	19.6029	4.90072	148.99	32.2815	8.07036	<.0001	2.27944e-05	OGG1; N-glycosylase/DNA lyase [EC:3.2.2.- 4.2.99.18]
K03661	11.1693	8.68863	2.17216	0.00770525	0.0137985	0.00344962	<.0001	5.38599e-06	ATPeV0B, ATP6F; V-type H+-transporting ATPase 21kDa proteolipid subunit
K03666	12.5629	5.69999	1.425	46.0379	8.35082	2.0877	<.0001	5.38599e-06	hfq; host factor-I protein
K03671	235.484	45.9715	11.4929	389.417	18.1029	4.52573	<.0001	5.38599e-06	trxA; thioredoxin 1
K03673	1.82345	3.56862	0.892156	1.95991	3.81388	0.95347	0.4287	0.450049	dsbA; protein dithiol oxidoreductase (disulfide-forming) [EC:1.8.4.15]
K03679	9.79497	9.82509	2.45627	5.60754	2.40257	0.600643	0.1748	0.195497	RRP4, EXOSC2; exosome complex component RRP4
K03681	3.88466	3.06968	0.76742	0.0006845	0.002738	0.0006845	<.0001	5.38599e-06	RRP40, EXOSC3; exosome complex component RRP40
K03685	230.912	38.7621	9.69053	312.743	21.2346	5.30866	<.0001	1.21479e-05	rnc, DROSHA, RNT1; ribonuclease III [EC:3.1.26.3]
K03693	0.0176133	0.0677331	0.0169333	0.0234941	0.0818453	0.0204613	0.5666	0.588021	pbp1b; penicillin-binding protein 1B
K03695	194.473	38.4376	9.60941	184.286	19.5538	4.88845	0.3089	0.334345	clpB; ATP-dependent Clp protease ATP-binding subunit ClpB
K03701	542.546	85.3683	21.3421	545.913	25.0918	6.27296	0.9399	0.943884	uvrA; excinuclease ABC subunit A
K03702	311.93	45.6044	11.4011	455.589	26.8046	6.70116	<.0001	5.38599e-06	uvrB; excinuclease ABC subunit B
K03703	332.633	49.9756	12.4939	433.329	19.8637	4.96593	<.0001	5.38599e-06	uvrC; excinuclease ABC subunit C
K03707	0.854165	0.546882	0.13672	11.8047	3.87157	0.967893	<.0001	5.38599e-06	tenA; thiaminase (transcriptional activator TenA) [EC:3.5.99.2]
K03723	302.476	48.5486	12.1372	394.51	26.7474	6.68685	<.0001	1.42253e-05	mfd; transcription-repair coupling factor (superfamily II helicase) [EC:3.6.4.-]
K03732	8.74765	4.06879	1.0172	1.99802	2.78073	0.695183	<.0001	0.000112898	rhlB; ATP-dependent RNA helicase RhlB [EC:3.6.4.13]
K03735	1.65189	0.605536	0.151384	37.5495	11.5349	2.88372	<.0001	5.38599e-06	eutB; ethanolamine ammonia-lyase large subunit [EC:4.3.1.7]
K03736	1.3865	0.635779	0.158945	34.872	10.5498	2.63744	<.0001	5.38599e-06	eutC; ethanolamine ammonia-lyase small subunit [EC:4.3.1.7]
K03737	272.298	48.9294	12.2324	381.949	25.8273	6.45682	<.0001	7.9474e-06	por, nifJ; pyruvate-ferredoxin/flavodoxin oxidoreductase [EC:1.2.7.1 1.2.7.-]
K03738	7.04957	2.27986	0.569965	61.2527	15.0422	3.76054	<.0001	5.38599e-06	aor; aldehyde:ferredoxin oxidoreductase [EC:1.2.7.5]
K03739	1.28637	1.06319	0.265798	1.9385	1.59166	0.397915	0.1871	0.208371	dltB; membrane protein involved in D-alanine export
K03740	1.30028	0.937863	0.234466	2.16766	1.72003	0.430006	0.0348	0.0448219	dltD; D-alanine transfer protein
K03742	90.2062	21.9803	5.49507	113.569	13.7705	3.44263	0.002	0.0031379	pncC; nicotinamide-nucleotide amidase [EC:3.5.1.42]
K03743	12.2506	6.04697	1.51174	37.4764	6.54136	1.63534	<.0001	7.9474e-06	pncC; nicotinamide-nucleotide amidase [EC:3.5.1.42]
K03750	30.435	17.9115	4.47788	65.064	15.1541	3.78852	<.0001	6.40768e-05	moeA; molybdopterin molybdotransferase [EC:2.10.1.1]
K03752	17.7721	8.30959	2.0774	32.224	9.91934	2.47983	<.0001	7.34758e-05	mobA; molybdenum cofactor guanylyltransferase [EC:2.7.7.77]
K03754	4.46003	3.56607	0.891517	0.000985063	0.00394025	0.000985063	<.0001	5.38599e-06	EIF2B2; translation initiation factor eIF-2B subunit beta
K03760	25.0358	12.139	3.03474	12.4183	11.3536	2.8384	0.0012	0.00193808	eptA, pmrC; lipid A ethanolaminephosphotransferase [EC:2.7.8.43]
K03763	118.59	24.8993	6.22482	256.42	49.0412	12.2603	<.0001	1.04859e-05	polC; DNA polymerase III subunit alpha, Gram-positive type [EC:2.7.7.7]
K03767	1.24828	1.22804	0.307009	1.51128	1.20683	0.301707	0.386	0.407501	PPIA; peptidyl-prolyl cis-trans isomerase A (cyclophilin A) [EC:5.2.1.8]
K03776	0	0	0	1.0592	4.19953	1.04988	0.0171	0.0233006	aer; aerotaxis receptor
K03777	0	0	0	0.145052	0.558464	0.139616	0.0359	0.0455167	dld; D-lactate dehydrogenase (quinone) [EC:1.1.5.12]
K03778	60.8608	13.661	3.41524	91.6568	18.1049	4.52624	<.0001	7.34758e-05	ldhA; D-lactate dehydrogenase [EC:1.1.1.28]
K03779	10.511	5.18429	1.29607	3.79935	2.6872	0.6718	<.0001	7.34758e-05	ttdA; L(+)-tartrate dehydratase alpha subunit [EC:4.2.1.32]
K03780	9.76601	4.69487	1.17372	3.36854	2.33107	0.582767	<.0001	3.52558e-05	ttdB; L(+)-tartrate dehydratase beta subunit [EC:4.2.1.32]
K03781	0.957816	1.61308	0.403269	45.023	16.4814	4.12035	<.0001	5.38599e-06	katE, CAT, catB, srpA; catalase [EC:1.11.1.6]
K03782	0.197468	0.0702952	0.0175738	1.67741	1.11479	0.278697	<.0001	5.38599e-06	katG; catalase-peroxidase [EC:1.11.1.21]
K03783	156.288	29.4317	7.35792	149.707	12.367	3.09176	0.3089	0.334345	punA, PNP; purine-nucleoside phosphorylase [EC:2.4.2.1]
K03784	174.935	20.9919	5.24798	165.099	31.5755	7.89388	0.3089	0.334345	deoD; purine-nucleoside phosphorylase [EC:2.4.2.1]
K03785	11.2708	7.0302	1.75755	26.0149	9.10951	2.27738	<.0001	4.0984e-05	aroD; 3-dehydroquinate dehydratase I [EC:4.2.1.10]
K03786	119.762	26.8151	6.70378	175.571	13.2995	3.32488	<.0001	7.9474e-06	aroQ, qutE; 3-dehydroquinate dehydratase II [EC:4.2.1.10]
K03787	164.292	29.5169	7.37922	115.422	15.4419	3.86047	<.0001	4.0984e-05	surE; 5'-nucleotidase [EC:3.1.3.5]
K03788	0	0	0	0.183887	0.670673	0.167668	0.0737	0.087769	aphA; acid phosphatase (class B) [EC:3.1.3.2]
K03795	0.568411	0.434988	0.108747	1.59794	1.69043	0.422607	0.0237	0.03148	cbiX; sirohydrochlorin cobaltochelatase [EC:4.99.1.3]
K03800	65.5129	16.5238	4.13096	82.8583	12.3067	3.07667	0.0026	0.00395853	lplA, lplJ, lipL1; lipoate---protein ligase [EC:6.3.1.20]
K03801	1.95822	2.57573	0.643933	14.7645	9.43299	2.35825	<.0001	1.95324e-05	lipB; lipoyl(octanoyl) transferase [EC:2.3.1.181]
K03809	3.04193	0.663161	0.16579	6.47782	3.65479	0.913697	<.0001	0.000175964	wrbA; NAD(P)H dehydrogenase (quinone) [EC:1.6.5.2]
K03814	80.1642	20.8312	5.20781	22.6721	6.65958	1.6649	<.0001	6.88093e-06	mtgA; monofunctional glycosyltransferase [EC:2.4.1.129]
K03816	76.6317	17.6969	4.42423	195.015	22.0587	5.51467	<.0001	5.38599e-06	xpt; xanthine phosphoribosyltransferase [EC:2.4.2.22]
K03821	0.823982	0.445153	0.111288	2.49332	1.10508	0.276271	<.0001	1.21479e-05	phbC, phaC; polyhydroxyalkanoate synthase subunit PhaC [EC:2.3.1.-]
K03831	13.654	7.14019	1.78505	26.7733	8.08817	2.02204	<.0001	0.00013093	mogA; molybdopterin adenylyltransferase [EC:2.7.7.75]
K03841	0.556871	0.524188	0.131047	1.82844	1.47181	0.367953	<.0001	6.40768e-05	FBP, fbp; fructose-1,6-bisphosphatase I [EC:3.1.3.11]
K03842	3.19252	2.51751	0.629378	0.00260988	0.00568241	0.0014206	<.0001	5.38599e-06	ALG1; beta-1,4-mannosyltransferase [EC:2.4.1.142]
K03843	4.43239	3.52768	0.881921	0.00125962	0.0050385	0.00125962	<.0001	5.38599e-06	ALG2; alpha-1,3/alpha-1,6-mannosyltransferase [EC:2.4.1.132 2.4.1.257]
K03844	5.26436	4.24275	1.06069	0.0496105	0.109431	0.0273579	<.0001	6.66719e-06	ALG11; alpha-1,2-mannosyltransferase [EC:2.4.1.131]
K03848	3.00623	2.56285	0.640714	0	0	0	<.0001	5.38599e-06	ALG6; alpha-1,3-glucosyltransferase [EC:2.4.1.267]
K03849	1.12114	1.08021	0.270053	0	0	0	<.0001	5.38599e-06	ALG8; alpha-1,3-glucosyltransferase [EC:2.4.1.265]
K03850	0.908816	0.783706	0.195926	0	0	0	<.0001	5.38599e-06	ALG10; alpha-1,2-glucosyltransferase [EC:2.4.1.256]
K03851	0.000787063	0.00215067	0.000537668	0.456463	0.950165	0.237541	<.0001	7.92674e-05	tpa; taurine-pyruvate aminotransferase [EC:2.6.1.77]
K03852	0	0	0	0.992786	0.560036	0.140009	<.0001	5.38599e-06	xsc; sulfoacetaldehyde acetyltransferase [EC:2.3.3.15]
K03856	47.5526	12.638	3.15949	113.219	18.8439	4.71097	<.0001	5.38599e-06	AROA2, aroA; 3-deoxy-7-phosphoheptulonate synthase [EC:2.5.1.54]
K03857	5.2906	4.29341	1.07335	0.0221086	0.0693643	0.0173411	<.0001	5.38599e-06	PIGA, GPI3; phosphatidylinositol N-acetylglucosaminyltransferase subunit A [EC:2.4.1.198]
K03861	0.657197	0.810766	0.202692	0.00358187	0.0143275	0.00358187	<.0001	0.000137452	PIGP, GPI19, DSCR5; phosphatidylinositol N-acetylglucosaminyltransferase subunit P
K03863	0.026101	0.0332366	0.00830916	0.0704404	0.0848427	0.0212107	0.1065	0.123881	vanB; vanillate monooxygenase ferredoxin subunit
K03868	4.43011	3.80878	0.952194	0.00373662	0.0149465	0.00373662	<.0001	5.38599e-06	RBX1, ROC1; RING-box protein 1 [EC:2.3.2.32]
K03871	0.0108848	0.0122359	0.00305898	0.0512987	0.0764111	0.0191028	0.2008	0.223112	VHL; von Hippel-Lindau disease tumor supressor
K03872	0	0	0	0.0364134	0.0734916	0.0183729	0.0079	0.0113948	ELOC, TCEB1; elongin-C
K03880	0.0940491	0.107446	0.0268616	0.0222948	0.0613716	0.0153429	0.0001	0.000209997	ND3; NADH-ubiquinone oxidoreductase chain 3 [EC:7.1.1.2]
K03882	0.155559	0.101985	0.0254963	0.232672	0.19905	0.0497625	0.2	0.222382	ND4L; NADH-ubiquinone oxidoreductase chain 4L [EC:7.1.1.2]
K03883	0	0	0	1.10331	1.13704	0.28426	<.0001	5.38599e-06	ND5; NADH-ubiquinone oxidoreductase chain 5 [EC:7.1.1.2]
K03884	0.0976329	0.114398	0.0285996	0.0262048	0.0677504	0.0169376	0.003	0.00452268	ND6; NADH-ubiquinone oxidoreductase chain 6 [EC:7.1.1.2]
K03885	6.13171	3.8615	0.965376	4.58664	5.47136	1.36784	0.0595	0.0728621	ndh; NADH dehydrogenase [EC:1.6.99.3]
K03886	0	0	0	0.406507	0.395572	0.0988931	<.0001	5.38599e-06	MQCRA, qcrA, bfcA, petC; menaquinol-cytochrome c reductase iron-sulfur subunit [EC:1.10.2.-]
K03888	0	0	0	0.024522	0.098088	0.024522	0.3173	0.339304	MQCRC, qcrC, bfcC, petD; menaquinol-cytochrome c reductase cytochrome b/c subunit
K03889	0	0	0	0.0175254	0.0363434	0.00908585	0.0079	0.0113948	qcrC; ubiquinol-cytochrome c reductase cytochrome c subunit
K03890	0.002001	0.008004	0.002001	0.0128693	0.0434761	0.010869	0.5025	0.524008	qcrA; ubiquinol-cytochrome c reductase iron-sulfur subunit
K03891	0.00536788	0.0115337	0.00288343	0.0396093	0.0525427	0.0131357	0.0159	0.0220315	qcrB; ubiquinol-cytochrome c reductase cytochrome b subunit
K03921	0.0205672	0.0260899	0.00652249	0.0788406	0.0851402	0.0212851	0.0025	0.00393028	FAB2, SSI2, desA1; acyl-[acyl-carrier-protein] desaturase [EC:1.14.19.2 1.14.19.11 1.14.19.26]
K03937	0.0213862	0.0347356	0.0086839	0.130961	0.138285	0.0345712	0.0002	0.000408456	NDUFS4; NADH dehydrogenase (ubiquinone) Fe-S protein 4
K03953	0.0466764	0.0326285	0.00815712	0.299961	0.254374	0.0635936	<.0001	1.42253e-05	NDUFA9; NADH dehydrogenase (ubiquinone) 1 alpha subcomplex subunit 9
K03963	0	0	0	0.0162131	0.0648525	0.0162131	0.3173	0.339304	NDUFB7; NADH dehydrogenase (ubiquinone) 1 beta subcomplex subunit 7
K04019	1.04516	0.401915	0.100479	31.005	11.4159	2.85398	<.0001	5.38599e-06	eutA; ethanolamine utilization protein EutA
K04020	0	0	0	0.11297	0.429365	0.107341	0.0359	0.0455167	eutD; phosphotransacetylase
K04021	0.458941	0.369623	0.0924056	1.1176	0.588572	0.147143	0.0008	0.00132396	eutE; aldehyde dehydrogenase
K04022	0	0	0	0.12549	0.483047	0.120762	0.0359	0.0455167	eutG; alcohol dehydrogenase
K04032	1.02215	0.541894	0.135474	35.2272	11.2704	2.8176	<.0001	5.38599e-06	eutT; ethanolamine utilization cobalamin adenosyltransferase [EC:2.5.1.17]
K04034	39.9435	12.0468	3.01169	92.0916	36.3213	9.08032	<.0001	1.21479e-05	bchE; anaerobic magnesium-protoporphyrin IX monomethyl ester cyclase [EC:1.21.98.3]
K04041	102.14	25.9802	6.49504	98.7311	15.7583	3.93958	0.7063	0.720517	fbp3; fructose-1,6-bisphosphatase III [EC:3.1.3.11]
K04042	32.927	11.0784	2.76959	51.3305	10.7264	2.68159	0.0003	0.000608085	glmU; bifunctional UDP-N-acetylglucosamine pyrophosphorylase / Glucosamine-1-phosphate N-acetyltransferase [EC:2.7.7.23 2.3.1.157]
K04043	228.343	40.6569	10.1642	282.839	33.2437	8.31094	0.0009	0.00150255	dnaK, HSPA9; molecular chaperone DnaK
K04056	0.899027	0.837108	0.209277	0.729539	0.988441	0.24711	0.1748	0.195497	yscO, sctO; type III secretion protein O
K04058	0.376503	0.376966	0.0942414	0.477455	0.695143	0.173786	0.91	0.916097	yscW, sctW; type III secretion protein W
K04059	0.0664123	0.102485	0.0256212	0.304671	0.447469	0.111867	0.0316	0.0410843	yscX, sctX; type III secretion protein X
K04066	298.228	50.4854	12.6214	445.29	25.5982	6.39955	<.0001	5.38599e-06	priA; primosomal protein N' (replication factor Y) (superfamily II helicase) [EC:3.6.4.-]
K04067	0	0	0	0.128066	0.49886	0.124715	0.0359	0.0455167	priC; primosomal replication protein N''
K04072	36.6865	9.2999	2.32497	143.399	30.6093	7.65233	<.0001	5.38599e-06	adhE; acetaldehyde dehydrogenase / alcohol dehydrogenase [EC:1.2.1.10 1.1.1.1]
K04073	0.0254262	0.0177336	0.0044334	0.258583	0.431659	0.107915	<.0001	3.52558e-05	mhpF; acetaldehyde dehydrogenase [EC:1.2.1.10]
K04077	280.114	50.9351	12.7338	414.065	20.6614	5.16536	<.0001	5.38599e-06	groEL, HSPD1; chaperonin GroEL
K04079	402.59	27.0047	6.75117	441.984	29.6383	7.40958	0.0006	0.00102927	HSP90A, htpG; molecular chaperone HtpG
K04085	28.0104	8.14098	2.03524	30.8083	12.8134	3.20336	0.6785	0.694077	tusA, sirA; tRNA 2-thiouridine synthesizing protein A [EC:2.8.1.-]
K04091	0.0927421	0.0661044	0.0165261	0.644359	0.723943	0.180986	<.0001	2.64595e-05	ssuD; alkanesulfonate monooxygenase [EC:1.14.14.5]
K04092	0.00660444	0.0153429	0.00383571	0.0301596	0.037158	0.00928951	0.0327	0.0423908	tyrA1; chorismate mutase [EC:5.4.99.5]
K04093	0.448356	0.359353	0.0898382	0.963104	0.595953	0.148988	0.0026	0.00395853	pheA1; chorismate mutase [EC:5.4.99.5]
K04098	0.0485188	0.0359481	0.00898703	0.247579	0.282412	0.0706029	<.0001	3.0485e-05	chqB; hydroxyquinol 1,2-dioxygenase [EC:1.13.11.37]
K04102	0.0188548	0.0273829	0.00684571	0.198357	0.183862	0.0459655	<.0001	8.88996e-06	pht5; 4,5-dihydroxyphthalate decarboxylase [EC:4.1.1.55]
K04105	0.0270557	0.0169546	0.00423864	0.0912888	0.100022	0.0250055	0.0226	0.0301576	hbaA; 4-hydroxybenzoate-CoA ligase [EC:6.2.1.27 6.2.1.25]
K04116	0.0525707	0.0315419	0.00788547	0.299286	0.295868	0.073967	<.0001	6.88093e-06	aliA; cyclohexanecarboxylate-CoA ligase [EC:6.2.1.-]
K04117	0.0257493	0.0195749	0.00489371	0.137233	0.185734	0.0464336	0.0002	0.000377184	aliB; cyclohexanecarboxyl-CoA dehydrogenase [EC:1.3.99.-]
K04257	0.000867062	0.00346825	0.000867062	0.195149	0.423387	0.105847	<.0001	7.69053e-05	OLFR; olfactory receptor
K04333	0	0	0	0.187707	0.711426	0.177857	0.0737	0.087769	csgD; LuxR family transcriptional regulator, csgAB operon transcriptional regulatory protein
K04334	0	0	0	0.112284	0.439115	0.109779	0.0737	0.087769	csgA; major curlin subunit
K04335	0.0132944	0.0295964	0.00739911	0.191351	0.568365	0.142091	0.001	0.00166272	csgB; minor curlin subunit
K04336	0	0	0	0.1533	0.551553	0.137888	0.0359	0.0455167	csgC; curli production protein
K04348	19.0297	15.0893	3.77231	0.00219788	0.00722389	0.00180597	<.0001	5.38599e-06	PPP3C, CNA; serine/threonine-protein phosphatase 2B catalytic subunit [EC:3.1.3.16]
K04354	12.2865	9.72518	2.4313	0.0245407	0.0488672	0.0122168	<.0001	5.38599e-06	PPP2R2; serine/threonine-protein phosphatase 2A regulatory subunit B
K04371	1.47191	2.21469	0.553672	0	0	0	<.0001	7.00273e-05	ERK, MAPK1_3; mitogen-activated protein kinase 1/3 [EC:2.7.11.24]
K04382	24.4717	19.6718	4.91795	0.00275769	0.00620965	0.00155241	<.0001	5.38599e-06	PPP2C; serine/threonine-protein phosphatase 2A catalytic subunit [EC:3.1.3.16]
K04460	20.6415	16.1988	4.04969	0.00161044	0.00454249	0.00113562	<.0001	5.38599e-06	PPP5C; serine/threonine-protein phosphatase 5 [EC:3.1.3.16]
K04478	0.611818	0.843828	0.210957	3.65185	2.95633	0.739083	0.0001	0.000201456	sgtB; monofunctional glycosyltransferase [EC:2.4.1.129]
K04480	0.44214	0.282296	0.0705741	0.742482	0.620805	0.155201	0.2913	0.316677	mtaB; methanol---5-hydroxybenzimidazolylcobamide Co-methyltransferase [EC:2.1.1.90]
K04482	8.27808	6.43967	1.60992	0.0024005	0.00660211	0.00165053	<.0001	5.38599e-06	RAD51; DNA repair protein RAD51
K04486	160.898	31.5266	7.88166	415.232	41.7089	10.4272	<.0001	5.38599e-06	E3.1.3.15B; histidinol-phosphatase (PHP family) [EC:3.1.3.15]
K04487	232.381	36.3703	9.09258	465.599	66.6625	16.6656	<.0001	5.38599e-06	iscS, NFS1; cysteine desulfurase [EC:2.8.1.7]
K04499	14.2255	11.4021	2.85053	0.00259581	0.00571848	0.00142962	<.0001	5.38599e-06	RUVBL1, RVB1, INO80H; RuvB-like protein 1 (pontin 52)
K04506	0.739754	0.854851	0.213713	0	0	0	<.0001	5.38599e-06	SIAH1; E3 ubiquitin-protein ligase SIAH1 [EC:2.3.2.27]
K04507	14.6351	11.1781	2.79454	0.0252862	0.0472769	0.0118192	<.0001	5.38599e-06	CACYBP, SIP; calcyclin binding protein
K04516	117.362	28.1058	7.02645	55.7218	16.916	4.22899	<.0001	3.52558e-05	AROA1, aroA; chorismate mutase [EC:5.4.99.5]
K04517	67.3809	17.3801	4.34503	140.619	14.7684	3.6921	<.0001	5.38599e-06	tyrA2; prephenate dehydrogenase [EC:1.3.1.12]
K04518	116.263	22.9168	5.7292	117.768	17.981	4.49525	0.9399	0.943884	pheA2; prephenate dehydratase [EC:4.2.1.51]
K04551	49.4844	40.4466	10.1117	0.00879494	0.016261	0.00406525	<.0001	5.38599e-06	UBB; ubiquitin B
K04554	0	0	0	0.0107468	0.032734	0.00818349	0.1508	0.170457	UBE2J2, NCUBE2, UBC6; ubiquitin-conjugating enzyme E2 J2 [EC:2.3.2.23]
K04561	0.0324594	0.025246	0.0063115	0.180899	0.216509	0.0541273	0.0024	0.00375033	norB; nitric oxide reductase subunit B [EC:1.7.2.5]
K04564	118.317	20.9936	5.24839	76.6618	19.8353	4.95884	<.0001	9.82894e-05	SOD2; superoxide dismutase, Fe-Mn family [EC:1.15.1.1]
K04565	2.49663	2.6399	0.659974	44.0492	12.8282	3.20706	<.0001	5.38599e-06	SOD1; superoxide dismutase, Cu-Zn family [EC:1.15.1.1]
K04566	18.2864	9.44437	2.36109	20.749	3.99542	0.998856	0.0458	0.0572048	lysK; lysyl-tRNA synthetase, class I [EC:6.1.1.6]
K04567	299.568	34.5481	8.63702	396.121	26.38	6.59501	<.0001	5.38599e-06	KARS, lysS; lysyl-tRNA synthetase, class II [EC:6.1.1.6]
K04638	20.7747	15.1041	3.77602	0.00820544	0.0101841	0.00254602	<.0001	5.38599e-06	IFT57, HIPPI, ESRRBL1; intraflagellar transport protein 57
K04646	14.8864	11.8148	2.9537	0.00202725	0.00424279	0.0010607	<.0001	5.38599e-06	CLTC; clathrin heavy chain
K04649	30.2541	22.9597	5.73992	0.00297438	0.00851813	0.00212953	<.0001	5.38599e-06	HIP2, UBC1; ubiquitin-conjugating enzyme (huntingtin interacting protein 2) [EC:2.3.2.23]
K04683	1.3339	1.09377	0.273441	0	0	0	<.0001	5.38599e-06	TFDP1; transcription factor Dp-1
K04708	0.198119	0.278928	0.0697319	0	0	0	<.0001	9.87573e-06	KDSR; 3-dehydrosphinganine reductase [EC:1.1.1.102]
K04712	0.0257521	0.0236939	0.00592347	0.0604976	0.0702275	0.0175569	0.1065	0.123881	DEGS; sphingolipid 4-desaturase/C4-monooxygenase [EC:1.14.19.17 1.14.18.5]
K04719	0.162236	0.0692224	0.0173056	0.601215	0.499354	0.124839	<.0001	8.51833e-05	bluB; 5,6-dimethylbenzimidazole synthase [EC:1.13.11.79]
K04720	42.689	14.5505	3.63763	22.7405	6.33655	1.58414	<.0001	0.00013093	cobD; threonine-phosphate decarboxylase [EC:4.1.1.81]
K04739	55.9937	41.6175	10.4044	0.00906087	0.0144385	0.00360962	<.0001	5.38599e-06	PRKAR; cAMP-dependent protein kinase regulator
K04751	30.5843	9.18798	2.297	41.6044	7.71952	1.92988	0.0026	0.00395853	glnB; nitrogen regulatory protein P-II 1
K04761	23.2123	10.7635	2.69087	36.8742	18.372	4.593	0.0215	0.028733	oxyR; LysR family transcriptional regulator, hydrogen peroxide-inducible genes activator
K04765	0.0270504	0.0327887	0.00819718	0.347494	0.629143	0.157286	<.0001	5.45796e-05	mazG; nucleoside triphosphate diphosphatase [EC:3.6.1.9]
K04771	163.023	39.8086	9.95215	151.188	21.2321	5.30803	0.1134	0.131454	degP, htrA; serine protease Do [EC:3.4.21.107]
K04782	0.967771	1.31841	0.329602	0.279089	0.289037	0.0722593	0.0129	0.0180314	pchB; isochorismate pyruvate lyase [EC:4.2.99.21]
K04784	0.530691	0.544378	0.136094	0.0753576	0.0695628	0.0173907	0.0014	0.00219027	irp2, HMWP2; yersiniabactin nonribosomal peptide synthetase
K04799	12.8044	12.2241	3.05604	6.49588	2.34246	0.585616	0.0704	0.0854759	FEN1, RAD2; flap endonuclease-1 [EC:3.-.-.-]
K04800	5.94298	9.25558	2.3139	5.94895	2.00097	0.500243	0.0348	0.0448219	rfcL; replication factor C large subunit
K04801	5.55009	8.50017	2.12504	5.52143	1.6635	0.415875	0.0546	0.0671479	rfcS; replication factor C small subunit
K04802	49.5068	37.4736	9.3684	8.07976	3.03762	0.759405	0.0006	0.00102927	PCNA; proliferating cell nuclear antigen
K04835	1.44166	1.48207	0.370518	25.7272	7.44853	1.86213	<.0001	5.38599e-06	mal; methylaspartate ammonia-lyase [EC:4.3.1.2]
K05030	0	0	0	0.139469	0.243077	0.0607693	<.0001	0.000178207	CLCA3_4; calcium-activated chloride channel regulator 3/4
K05275	28.1926	9.63859	2.40965	12.758	3.14122	0.785304	<.0001	9.18181e-06	E1.1.1.65; pyridoxine 4-dehydrogenase [EC:1.1.1.65]
K05283	0	0	0	0.0940721	0.141926	0.0354815	0.0035	0.00534752	PIGW; glucosaminylphosphatidylinositol acyltransferase [EC:2.3.-.-]
K05284	3.32687	2.93105	0.732763	0.0324781	0.058333	0.0145833	<.0001	5.39201e-06	PIGM; GPI mannosyltransferase 1 subunit M [EC:2.4.1.-]
K05285	2.81422	2.96732	0.741831	0.000620813	0.00248325	0.000620813	<.0001	5.63138e-06	PIGN; GPI ethanolamine phosphate transferase 1 [EC:2.7.-.-]
K05293	0.358942	0.456894	0.114223	0	0	0	<.0001	7.00273e-05	PIGU; GPI-anchor transamidase subunit U
K05299	0.0860849	0.172718	0.0431795	0.3783	0.434019	0.108505	0.0013	0.00218108	fdhA; formate dehydrogenase (NADP+) alpha subunit [EC:1.17.1.10]
K05301	0.0510062	0.0273205	0.00683013	0.250964	0.243216	0.060804	<.0001	9.18181e-06	E1.8.2.1; sulfite dehydrogenase [EC:1.8.2.1]
K05304	7.47282	3.38686	0.846715	2.0602	1.422	0.355501	<.0001	3.52558e-05	NANS, SAS; sialic acid synthase [EC:2.5.1.56 2.5.1.57 2.5.1.132]
K05306	0.0371208	0.0784784	0.0196196	2.47626	1.42519	0.356296	<.0001	5.38599e-06	phnX; phosphonoacetaldehyde hydrolase [EC:3.11.1.1]
K05307	0	0	0	0.111798	0.172716	0.0431789	<.0001	0.000178207	THTPA; thiamine-triphosphatase [EC:3.6.1.28]
K05341	21.5293	7.13978	1.78495	14.2235	5.4898	1.37245	0.0047	0.00701791	E2.4.1.4; amylosucrase [EC:2.4.1.4]
K05342	3.60902	1.9804	0.495099	3.28012	1.89949	0.474871	0.4287	0.450049	E2.4.1.64; alpha,alpha-trehalose phosphorylase [EC:2.4.1.64]
K05343	0.333062	0.278419	0.0696049	1.68121	2.37457	0.593642	0.0067	0.00977542	treS; maltose alpha-D-glucosyltransferase / alpha-amylase [EC:5.4.99.16 3.2.1.1]
K05349	1085.7	234.317	58.5793	567.563	97.0335	24.2584	<.0001	9.18181e-06	bglX; beta-glucosidase [EC:3.2.1.21]
K05350	2.10501	1.57591	0.393977	4.59155	2.45211	0.613026	0.001	0.00170309	bglB; beta-glucosidase [EC:3.2.1.21]
K05352	7.64529	7.75318	1.9383	15.3762	8.50925	2.12731	0.0001	0.00026839	tarJ; ribitol-5-phosphate 2-dehydrogenase (NADP+) [EC:1.1.1.405]
K05357	0	0	0	0.196499	0.381063	0.0952658	<.0001	0.000178207	VKORC1; vitamin-K-epoxide reductase (warfarin-sensitive) [EC:1.17.4.4]
K05362	0.666968	2.3188	0.579701	1.62714	3.71346	0.928366	0.0002	0.000306897	murE; UDP-N-acetylmuramoyl-L-alanyl-D-glutamate-L-lysine ligase [EC:6.3.2.7]
K05363	8.40908	5.01599	1.254	28.6987	10.4364	2.60909	<.0001	1.66322e-05	murM; serine/alanine adding enzyme [EC:2.3.2.10]
K05364	20.2355	6.30513	1.57628	37.6519	9.66109	2.41527	<.0001	2.27944e-05	pbpA; penicillin-binding protein A
K05365	1.19266	2.89729	0.724321	0.859837	3.12812	0.78203	0.0262	0.0344475	mrcB; penicillin-binding protein 1B [EC:2.4.1.129 3.4.16.4]
K05366	190.646	46.4567	11.6142	125.793	15.8529	3.96322	0.0001	0.000201456	mrcA; penicillin-binding protein 1A [EC:2.4.1.129 3.4.16.4]
K05367	50.9056	16.1138	4.02845	16.2525	8.41251	2.10313	<.0001	6.88093e-06	pbpC; penicillin-binding protein 1C [EC:2.4.1.129]
K05368	0	0	0	0.139838	0.516724	0.129181	0.0359	0.0455167	fre, ubiB; aquacobalamin reductase / NAD(P)H-flavin reductase [EC:1.16.1.3 1.5.1.41]
K05375	0	0	0	0.0576368	0.191307	0.0478268	0.0359	0.0455167	mbtH, nocI; MbtH protein
K05396	0.727966	0.541412	0.135353	3.31935	1.68672	0.42168	<.0001	1.95324e-05	dcyD; D-cysteine desulfhydrase [EC:4.4.1.15]
K05515	211.67	47.0613	11.7653	252.394	25.3556	6.33891	0.0075	0.0108475	mrdA; penicillin-binding protein 2 [EC:3.4.16.4]
K05522	0.009634	0.0158616	0.00396539	0.197034	0.515797	0.128949	0.0013	0.00213086	nei; endonuclease VIII [EC:3.2.2.- 4.2.99.18]
K05523	0.156481	0.601875	0.150469	0.138232	0.544505	0.136126	0.2518	0.277079	hchA; D-lactate dehydratase / protein deglycase [EC:4.2.1.130 3.5.1.124]
K05526	0	0	0	0.140589	0.543395	0.135849	0.0171	0.0233006	astE; succinylglutamate desuccinylase [EC:3.5.1.96]
K05549	0.0309018	0.020873	0.00521825	0.184694	0.192073	0.0480183	0.0001	0.000250675	benA-xylX; benzoate/toluate 1,2-dioxygenase subunit alpha [EC:1.14.12.10 1.14.12.-]
K05550	0.0290504	0.030164	0.00754101	0.116174	0.125697	0.0314242	0.0009	0.00148158	benB-xylY; benzoate/toluate 1,2-dioxygenase subunit beta [EC:1.14.12.10 1.14.12.-]
K05555	0.745673	0.71535	0.178837	2.53056	1.25121	0.312802	<.0001	7.34758e-05	actIV; cyclase [EC:4.-.-.-]
K05556	0.031842	0.0379266	0.00948165	0.12258	0.148265	0.0370661	0.0066	0.0096785	actVI1, RED1; ketoreductase RED1 [EC:1.1.1.-]
K05573	0.490762	0.428848	0.107212	0.410947	1.48638	0.371596	<.0001	9.46153e-05	ndhB; NAD(P)H-quinone oxidoreductase subunit 2 [EC:7.1.1.2]
K05574	0.172047	0.161675	0.0404188	0.157332	0.519735	0.129934	0.0022	0.0034499	ndhC; NAD(P)H-quinone oxidoreductase subunit 3 [EC:7.1.1.2]
K05575	0.176017	0.137111	0.0342777	0.202508	0.756971	0.189243	<.0001	0.000100818	ndhD; NAD(P)H-quinone oxidoreductase subunit 4 [EC:7.1.1.2]
K05578	0.115365	0.119237	0.0298094	0.146156	0.514642	0.128661	0.0008	0.00126538	ndhG; NAD(P)H-quinone oxidoreductase subunit 6 [EC:7.1.1.2]
K05579	0.215269	0.1851	0.046275	0.145476	0.516134	0.129034	<.0001	0.000116042	ndhH; NAD(P)H-quinone oxidoreductase subunit H [EC:7.1.1.2]
K05580	0.209888	0.187229	0.0468073	0.166841	0.583745	0.145936	0.0002	0.000306897	ndhI; NAD(P)H-quinone oxidoreductase subunit I [EC:7.1.1.2]
K05581	0.183011	0.160711	0.0401777	0.195409	0.68605	0.171513	0.0009	0.00154354	ndhJ; NAD(P)H-quinone oxidoreductase subunit J [EC:7.1.1.2]
K05582	0.20758	0.209592	0.0523979	0.198443	0.681137	0.170284	0.0002	0.000439504	ndhK; NAD(P)H-quinone oxidoreductase subunit K [EC:7.1.1.2]
K05592	116.38	28.4966	7.12415	72.5786	23.4372	5.8593	0.0001	0.000201456	deaD, cshA; ATP-dependent RNA helicase DeaD [EC:3.6.4.13]
K05601	64.8617	15.3143	3.82857	46.9779	8.45913	2.11478	0.0001	0.000201456	hcp; hydroxylamine reductase [EC:1.7.99.1]
K05602	2.02569	1.58772	0.396931	0.684078	0.386106	0.0965264	0.0002	0.000408403	hisN; histidinol-phosphatase [EC:3.1.3.15]
K05603	0.0180047	0.0172484	0.00431209	0.107422	0.100642	0.0251606	0.0003	0.00049334	hutF; formimidoylglutamate deiminase [EC:3.5.3.13]
[truncated: 2,044 more rows]

## Sheet: Pathways
Pathway name	Ko ID	Function gene name(symbol)	Reaction
Embden-meyerhof-parnas	K00844	HK	ATP + alpha-D-Glucose <=> ADP + alpha-D-Glucose 6-phosphate
	K00845	glk	ATP + alpha-D-Glucose <=> ADP + alpha-D-Glucose 6-phosphate
	K00886	ppgK	Polyphosphate + alpha-D-Glucose <=> Polyphosphate + alpha-D-Glucose 6-phosphate
	K00918	pfkC	alpha-D-Glucose + ADP <=> alpha-D-Glucose 6-phosphate + AMP
	K01810	GPI	alpha-D-Glucose 6-phosphate <=> beta-D-Fructose 6-phosphate
	K06859	pgi1	alpha-D-Glucose 6-phosphate <=> beta-D-Fructose 6-phosphate
	K13810	tal-pgi	alpha-D-Glucose 6-phosphate <=> beta-D-Fructose 6-phosphate
	K15916	pgi-pmi	alpha-D-Glucose 6-phosphate <=> beta-D-Fructose 6-phosphate
	K00850	pfkA, PFK	ATP + beta-D-Fructose 6-phosphate <=> ADP + beta-D-Fructose 1,6-bisphosphate
	K16370	pfkB	ATP + beta-D-Fructose 6-phosphate <=> ADP + beta-D-Fructose 1,6-bisphosphate
	K01624	FBA, fbaA	beta-D-Fructose 1,6-bisphosphate <=> Glycerone phosphate + D-Glyceraldehyde 3-phosphate
	K11645	fbaB	beta-D-Fructose 1,6-bisphosphate <=> Glycerone phosphate + D-Glyceraldehyde 3-phosphate
	K16305	K16305	beta-D-Fructose 1,6-bisphosphate <=> Glycerone phosphate + D-Glyceraldehyde 3-phosphate
	K16306	K16306	beta-D-Fructose 1,6-bisphosphate <=> Glycerone phosphate + D-Glyceraldehyde 3-phosphate
	K01622	K01622	beta-D-Fructose 1,6-bisphosphate <=> Glycerone phosphate + D-Glyceraldehyde 3-phosphate
	K01803	TPI, tpiA	D-Glyceraldehyde 3-phosphate <=> Glycerone phosphate
	K00134	GAPDH, gapA	D-Glyceraldehyde 3-phosphate + Orthophosphate + NAD+ <=> 3-Phospho-D-glyceroyl phosphate + NADH + H+
	K00150	gap2	D-Glyceraldehyde 3-phosphate + Orthophosphate + NAD+ <=> 3-Phospho-D-glyceroyl phosphate + NADH + H+
	K00927	PGK, pgk	ATP + 3-Phospho-D-glycerate <=> ADP + 3-Phospho-D-glyceroyl phosphate
	K01834	PGAM, gpmA	2-Phospho-D-glycerate <=> 3-Phospho-D-glycerate
	K15633	gpmI	2-Phospho-D-glycerate <=> 3-Phospho-D-glycerate
	K15634	gpmB	2-Phospho-D-glycerate <=> 3-Phospho-D-glycerate
	K15635	apgM	2-Phospho-D-glycerate <=> 3-Phospho-D-glycerate
	K01689	ENO	2-Phospho-D-glycerate <=> Phosphoenolpyruvate + H2O
Pentose phosphate pathway	K01810	GPI, pgi	alpha-D-Glucose 6-phosphate <=> beta-D-Glucose 6-phosphate
	K06859	pgi1	alpha-D-Glucose 6-phosphate <=> beta-D-Glucose 6-phosphate
	K13810	tal-pgi	alpha-D-Glucose 6-phosphate <=> beta-D-Glucose 6-phosphate
	K15916	pgi-pmi	alpha-D-Glucose 6-phosphate <=> beta-D-Glucose 6-phosphate
Entner-Doudoroff pathway	K00036	G6PD, zwf	beta-D-Glucose 6-phosphate + NAD+ <=> D-Glucono-1,5-lactone 6-phosphate + NADH/NADPH + H+
	K01057	PGLS, pgl, devB	D-Glucono-1,5-lactone 6-phosphate + H2O <=> 6-Phospho-D-gluconate
	K07404	pgl	D-Glucono-1,5-lactone 6-phosphate + H2O <=> 6-Phospho-D-gluconate
	K01690	edd	6-Phospho-D-gluconate <=> 2-Dehydro-3-deoxy-6-phospho-D-gluconate + H2O
	K01625	eda	2-Dehydro-3-deoxy-6-phospho-D-gluconate <=> D-Glyceraldehyde 3-phosphate + Pyruvate
Pyruvate to Acetate	K00169	porA	2 Reduced ferredoxin + Acetyl-CoA + CO2 + 2 H+ <=> 2 Oxidized ferredoxin + Pyruvate + CoA
	K00170	porB	3 Reduced ferredoxin + Acetyl-CoA + CO2 + 2 H+ <=> 2 Oxidized ferredoxin + Pyruvate + CoA
	K00171	porD	4 Reduced ferredoxin + Acetyl-CoA + CO2 + 2 H+ <=> 2 Oxidized ferredoxin + Pyruvate + CoA
	K00172	porG	5 Reduced ferredoxin + Acetyl-CoA + CO2 + 2 H+ <=> 2 Oxidized ferredoxin + Pyruvate + CoA
	K00625	pta	Acetyl-CoA + Orthophosphate <=> CoA + Acetyl phosphate
	K13788	pta	Acetyl-CoA + Orthophosphate <=> CoA + Acetyl phosphate
	K15024	K15024	Acetyl-CoA + Orthophosphate <=> CoA + Acetyl phosphate
	K00925	ackA	ATP + Acetate <=> ADP + Acetyl phosphate
Acetyl-CoA to Butyrate	K00626	ACAT,atoB	2 Acetyl-CoA <=> CoA + Acetoacetyl-CoA
	K07516	fadN	(S)-3-hydroxyacyl-CoA + NAD+ = 3-oxoacyl-CoA + NADH + H+ ; (S)-3-Hydroxybutanoyl-CoA + NAD+ <=> Acetoacetyl-CoA + NADH + H+
	K01825	fadB	(S)-3-hydroxyacyl-CoA + NAD+ = 3-oxoacyl-CoA + NADH + H+ ; (S)-4-Hydroxybutanoyl-CoA + NAD+ <=> Acetoacetyl-CoA + NADH + H+
	K01782	fadJ	(S)-3-hydroxyacyl-CoA + NAD+ = 3-oxoacyl-CoA + NADH + H+ ; (S)-5-Hydroxybutanoyl-CoA + NAD+ <=> Acetoacetyl-CoA + NADH + H+
	K00074	paaH, hbd, fadB, mmgB	(S)-3-hydroxybutanoyl-CoA + NADP+ = 3-acetoacetyl-CoA + NADPH + H+
	K00023	phbB	(R)-3-hydroxyacyl-CoA + NADP+ = 3-oxoacyl-CoA + NADPH + H+
	K17865	croR	(3R)-3-hydroxybutanoyl-CoA = crotonoyl-CoA + H2O
	K01692	paaF, echA	(3R)-3-hydroxybutanoyl-CoA = crotonoyl-CoA + H2O ; (3S)-3-hydroxyacyl-CoA = trans-2(or 3)-enoyl-CoA + H2O
	K01715	crt	(3R)-3-hydroxybutanoyl-CoA = crotonoyl-CoA + H2O ; (3S)-3-hydroxyacyl-CoA = trans-2(or 3)-enoyl-CoA + H2O
	K00209	fabV, ter	Butanoyl-CoA + NAD+ <=> Crotonoyl-CoA + NADH + H+ ; acyl-CoA + NAD+ = trans-didehydroacyl-CoA + NADH + H+
	K00634	ptb	Butanoyl-CoA + Orthophosphate <=> CoA + Butanoylphosphate
	K00929	buk	ATP + Butanoic acid <=> ADP + Butanoylphosphate
	K01034	atoD	Butanoyl-CoA + Acetate <=> Butanoic acid + Acetyl-CoA
	K01035	atoA	Butanoyl-CoA + Acetate <=> Butanoic acid + Acetyl-CoA
Pyruvate to lactate to Proionate	K00016	LDH	(S)-Lactate + NAD+ <=> Pyruvate + NADH + H+
	K01026	pct	Lactoyl-CoA + Propanoate <=> (S)-Lactate + Propanoyl-CoA
	K20626	lcdA	Lactoyl-CoA <=> Propenoyl-CoA + H2O
	K20627	lcdB	Lactoyl-CoA <=> Propenoyl-CoA + H2O
	K19745	acuI	Propanoyl-CoA + NADP+ <=> Propenoyl-CoA + NADPH + H+
Pyruvate to succinate to Proionate	K01958	PC, pyc	ATP + Pyruvate + HCO3- <=> ADP + Orthophosphate + Oxaloacetate
	K01960	pycB	ATP + Pyruvate + HCO4- <=> ADP + Orthophosphate + Oxaloacetate
	K00024	mdh	(S)-Malate + NAD+ <=> Oxaloacetate + NADH + H+
	K01676	fumA, fumB	(S)-Malate <=> Fumarate + H2O
	K01677	fumA	(S)-Malate <=> Fumarate + H3O
	K01678	fumB	(S)-Malate <=> Fumarate + H4O
	K01679	fumC	(S)-Malate <=> Fumarate + H5O
	K00244	frdA	Quinone + Succinate <=> Hydroquinone + Fumarate
	K00245	frdB	Quinone + Succinate <=> Hydroquinone + Fumarate
	K00246	frdC	Quinone + Succinate <=> Hydroquinone + Fumarate
	K00247	frdD	Quinone + Succinate <=> Hydroquinone + Fumarate
	K01900	LSC2	ATP + Succinate + CoA <=> ADP + Orthophosphate + Succinyl-CoA
	K01902	sucD	ATP + Succinate + CoA <=> ADP + Orthophosphate + Succinyl-CoA
	K01903	sucC	ATP + Succinate + CoA <=> ADP + Orthophosphate + Succinyl-CoA
	K01848	mcmA1	(R)-Methylmalonyl-CoA <=> Succinyl-CoA
	K01849	mcmA2	(R)-Methylmalonyl-CoA <=> Succinyl-CoA
	K05606	MCEE, epi	(R)-Methylmalonyl-CoA <=> (S)-Methylmalonyl-CoA
	K11264	scpB, mmcD	(S)-Methylmalonyl-CoA <=> Propanoyl-CoA + CO2
Wood-Ljungdahl pathway	K15023	acsE	Tetrahydrofolate + Acetyl-CoA <=> 5-Methyltetrahydrofolate + CoA + CO
	K14138	acsB	Tetrahydrofolate + Acetyl-CoA <=> 6-Methyltetrahydrofolate + CoA + CO
	K00197	cdhE, acsC	Tetrahydrofolate + Acetyl-CoA <=> 7-Methyltetrahydrofolate + CoA + CO
	K00194	cdhD, acsD	Tetrahydrofolate + Acetyl-CoA <=> 8-Methyltetrahydrofolate + CoA + CO
	K00196	cooF	CO + H2O + 2 Oxidized ferredoxin <=> CO2 + 2 Reduced ferredoxin + 2 H+
	K00198	cooS, acsA	CO + H2O + 2 Oxidized ferredoxin <=> CO2 + 2 Reduced ferredoxin + 3 H+
	K15022	fdhB	Formate + NADP+ <=> CO2 + NADPH + H
	K01938	fhs	Tetrahydrofolate + Formate + ATP <=> ADP + Orthophosphate + 10-Formyltetrahydrofolate
	K01491	folD	5,10-Methenyltetrahydrofolate + H2O <=> 10-Formyltetrahydrofolate + H+
	K00297	metF, MTHFR	5-Methyltetrahydrofolate + NAD+ <=> 5,10-Methylenetetrahydrofolate + NADH + H+
	K05299	fdhA	Formate + NADP+ <=> CO2 + NADPH + H+
	K01500	fchA	5,10-Methenyltetrahydrofolate + H2O <=> 10-Formyltetrahydrofolate + H+
Methanogenesis	K00200,K00201,K00202,K00203,K00204,K00205,K12160,K12161	fwdA,fwdB,fwdC,fwdD,fwdH,fwdF,SUMO,URM1	Formylmethanofuran + 2 Oxidized ferredoxin + H2O <=> Methanofuran + 2 Reduced ferredoxin + CO2 + 2 H+
	K00672	ftr	Formylmethanofuran + 5,6,7,8-Tetrahydromethanopterin <=> Methanofuran + 5-Formyl-5,6,7,8-tetrahydromethanopterin
	K01499	mch	5,10-Methenyltetrahydromethanopterin + H2O <=> 5-Formyl-5,6,7,8-tetrahydromethanopterin + H+
	K00319	mtd	5,10-Methylenetetrahydromethanopterin + Coenzyme F420 + H+ <=> 5,10-Methenyltetrahydromethanopterin + Reduced coenzyme F420
	K00320	mer	5,10-Methylenetetrahydromethanopterin + Reduced coenzyme F420 <=> 5-Methyl-5,6,7,8-tetrahydromethanopterin + Coenzyme F420
	K00577,K00578,K00579,K00580,K00581,K00582,K00583,K00584	mtrA,mtrB,mtrC,mtrD,mtrE,mtrF,mtrG,mtrH	5-Methyl-H4SPT + Coenzyme M + 2 Sodium cation(side 1) <=> Tetrahydrosarcinapterin + 2-(Methylthio)ethanesulfonate + 2 Sodium cation(side 2
	K00399,K00400,K00401,K00402,K03421,K03422	mcrA,K00400,mcrB,mcrG,mcrC,mcrD	Coenzyme B + 2-(Methylthio)ethanesulfonate <=> Coenzyme M 7-mercaptoheptanoylthreonine-phosphate heterodisulfide + Methane

## Sheet: AA
Pathway name	Genus	K00169	K00170	K00171	K00172	K00625	K13788	K15024	K00925
Pyruvate to Acetate	Absiella	0	0	0	0	0	0	0	0.136649
	Abyssisolibacter	0.0808924	0	0.0378279	0	0	0	0	0.016435
	Acetatifactor	0	0	0	0.129953	0.160579	0	0	0.208151
	Acetitomaculum	0	0	0	0	0.545095	0	0	0
	Acetivibrio	0	0	0	0	0	0	0	0.794765
	Acetobacterium	0	0	0	0	0	0	0.0409546	0
	Acetobacteroides	0	0	0	0	0.425739	0	0	0
	Acetohalobium	0	0.0568482	0	0	0	0	0	0
	Acholeplasma	0	0	0	0	0	0	0	0.0694361
	Acholeplasmatales_norank	0	0	0	0	0	0	1.22194	1.41863
	Acidaminococcus	0	0	0	0	0	0	0	0.249774
	Acidianus	0	0	0.0404057	0	0	0	0	0
	Acidiphilium	0	0	0	0	0	0	0.027543	0
	Acidobacteria_norank	0	0	0	0	0	0	0	0.0670299
	Acutalibacter	0	0	0	0	0	0	0	0.413007
	Aeriscardovia	0	0	0	0	0	0.242111	0	0.923249
	Agathobacter	0	0.854723	0.0141822	0	0.641207	0	1.1085	0.0282462
	Agathobaculum	0.188875	0.080088	0.23266	0	0	0	0	0.0632572
	Akkermansia	0	0	0.0218887	0	0	0	0	0
	Alistipes	0	0	0	0	0	0	0	14.2615
	Alkaliphilus	0	0	0	0	0	0	0	0.0644472
	Alloprevotella	0	0	0	0	0.0660421	0	0	0.203006
	Alphaproteobacteria_norank	0	0	0	0	0.0226232	0	0	0.772429
	Aminicella	0	0	0	0	0	0	0	0.0679114
	Aminipila	0.0718001	0	0.0395944	0	0	0	0.21874	0.193074
	Anaerobacterium	0.0458359	0	0	0.181132	0.0329365	0	0.0708887	0
	Anaerobium	0	0	0	0	0	0	0	0.0946224
	Anaerobutyricum	0	0	0	0.0819918	0	0	0	0
	Anaerocolumna	0	0	0	0	0.0387047	0	0	0.187367
	Anaerofilum	0	0	0	0	0	0	0.20687	1.24012
	Anaerolineaceae_norank	0	0	0	0	0	0	0	0.00821231
	Anaeromassilibacillus	0	0	0	0	0	0	0.324565	0.325144
	Anaeromicrobium	0	0	0.188296	0	0	0	0	0
	Anaeroplasma	0	0	0	0	0	0	0	2.07946
	Anaerorhabdus	0	0	0	0	0	0	0.0925279	0
	Anaerosalibacter	0	0	0	0	0	0	0.0438126	0
	Anaerospora	0	0	0	0	0	0	0	0.518288
	Anaerosporobacter	0	0	0	0	0	0	0.0302567	0
	Anaerostipes	0.127948	0	0	0.14781	0	0	0	0.107072
	Anaerotignum	0	0	0	0	1.7327	0	0	0.162705
	Anaerotruncus	4.95225	0.186755	0.00837813	0.734793	0	0	0.39654	0.999544
	Anaerovorax	0.0321259	0	0.0627987	0	0	0	0	0
	Andreesenia	0	0	0	0	0	0	0	0.0162241
	Angelakisella	0	0	0	0	0	0	1.79579	0
	Anoxybacter	0	0	0	0	0	0	0	0.13426
	Armatimonadetes_norank	0	0	0	0	0	0	0	0.0163076
	Asaccharobacter	0	0	0	0	0	0	0	0.0974916
	Atopobium	0	0	0	0	0	0	0	0.0243725
	Azospirillum	0	0	0	0	0	0	0	0.435098
	Bacillus	0	0	0	0.0196017	0	0	0.12442	8.5916
	Bacteria_norank	3.11215	0.436665	0.798483	6.79541	16.7343	0	0.586954	32.7461
	Bacteroidales_norank	0	0	0	0	22.0573	0	0	15.8839
	Bacteroides	0	0	0	0	6.41406	0	0.330002	33.1047
	Bacteroidetes_norank	0	0	0	0	0.138948	0	0	0.736082
	Bacteroidia_norank	0	0	0	0	0.80161	0	0	2.52683
	Balneolaceae_norank	0	0	0	0	0	0	0	0.0151509
	Bariatricus	0	0	0	0	0.0616358	0	0	1.07256
	Barnesiella	0	0	0	0	0	0	0	0.830142
	Betaproteobacteria_norank	0.0318519	0	0	0	0	0	0	0
	Bifidobacterium	0	0	0	0	0	0	0	0.0705658
	Blastopirellula	0	0	0	0	0	0	0	0.0759757
	Blautia	10.165	0	0.198056	8.7681	1.38266	0	1.68858	1.75673
	Bradyrhizobium	0	0	0	0	0	0	0	0.117104
	Breznakia	0	0	0	0	0	0	0	0.101756
	Bulleidia	0	0	0	0	0	0	0	0.0244593
	Butyricicoccus	0.0472021	0.207365	0.191948	0.0737808	0	0	0.12583	0.501788
	Butyricimonas	0	0	0	0	0.115372	0	0	0
	Butyrivibrio	0	0	0	0	1.86367	0	0	6.62919
	Caldalkalibacillus	0	0	0	0	0	0	0.146871	0
	Caldanaerobacter	0	0	0	0	0	0	0	0.270167
	Caldicellulosiruptor	0.0410577	0	0.0510482	0	0.361539	0	0	0.041475
	Caldicoprobacter	0.0405079	0	0	0.0508645	0	0	0	0.319455
	Caldisalinibacter	0	0	0	0	0	0	0	0.00993588
	Caloramator	0	0	0.174393	0	0.744888	0	0	0.102611
	Caloranaerobacter	0.0121221	0	0	0	0	0	0	0.285727
	Caminicella	0	0	0	0	0	0	0	0.195603
	Campylobacter	0	0	0	0	0	0	0	0.0789556
	candidate division NC10_norank	0	0.0294253	0	0	0	0	0	0
	Candidatus Aerophobetes_norank	0	0	0.0310405	0	0	0	0	0
	Candidatus Atribacteria_norank	0	0	0.11936	0	0	0	0	0
	Candidatus Borkfalkia	0	0	0	0	0	0	0	0.345531
	Candidatus Galacturonibacter	0	0	0	0	0.818292	0	0.288258	0
	Candidatus Handelsmanbacteria_norank	0	0	0	0	0	0	0	0.0556518
	Candidatus Omnitrophica_norank	0	0	0.3815	0	0	0	0	0
	Candidatus Phytoplasma	0	0	0	0	0	0	0	0.0202128
	Candidatus Saccharibacteria_norank	0	0	0	0	0	0	0	5.62424
	Candidatus Soleaferrea	0	0	0	0	0	0	0	0.149725
	Candidatus Stoquefichus	0	0	0	0	0	0	0.0584916	0.0787304
	Carboxydothermus	0	0	0	0	0	0	0	0.0352218
	Catabacter	0	0	0	0	0	0	0.298523	0
	Catonella	0	0	0	0	0	0	0	0.0783789
	Cetobacterium	0	0.0582696	0	0	0	0	0	0
	Christensenella	0	0	0	0	0.205474	0	0	0.39874
	Cloacibacillus	0	0	0	0	0	0	1.07377	0
	Clostridia_norank	1.57471	0.57649	0.967213	0.825947	0.698356	0	1.72492	2.75643
	Clostridiaceae_norank	0.0782911	0.0741167	0.0316222	0.0559273	2.96742	0	2.97449	5.41265
	Clostridiales Family XIII. Incertae Sedis_norank	0	0.0607309	0	0	0	0	0.137689	0.399748
	Clostridiales_norank	12.7866	8.24333	9.34787	8.27397	41.8272	0	21.2171	98.1629
	Clostridioides	0	0	0	0	0	0	0	0.081066
	Clostridium	34.0031	28.9527	16.4756	30.8001	24.8851	0	4.62903	125.005
	Colidextribacter	0	0	0	0	0	0	0	0.12451
	Coprobacillus	0	0	0	0	0	0	0.928651	4.27849
	Coprobacter	0	0	0	0	0	0	0	0.094811
	Coprococcus	0	0	0	0	0.0911985	0	0	0.526396
	Corallococcus	0	0	0	0	0	0	0	0.0845462
	Coriobacteriales_norank	0	0	0	0	0.129424	0	0	0.313392
	Crassaminicella	0	0	0	0	0	0	0	0.0678996
	Criibacterium	0	0	0	0	0	0	0	0.060732
	Cuneatibacter	0	0	0	0.0483516	0	0	0	0.046442
	Defluviitalea	0	0	0	0	0	0	0	0.644937
	Dehalobacterium	0	0	0	0	0	0	0.0808981	0.257762
	Dehalococcoides	0.0208877	0	0	0	0	0	0	0
	Dehalogenimonas	0	0	0.008059	0	0	0	0	0
	Deltaproteobacteria_norank	0.0338922	0	0	0	0	0	0	0.015495
	Denitrobacterium	0	0	0	0	0	0	0	0.0908214
	Desulfitobacterium	0	0	0	0	0	0	0	0.184136
	Desulfofarcimen	0	0	0	0	0	0	0	0.00615825
	Desulfosporosinus	0	0	0	0	0	0	0	0.133802
	Desulfovibrio	0	0	0	0	0	0.176685	0	0.386939
	Dictyoglomus	0	0	0	0	0	0	0	0.0177641
	Dielma	0	0	0	0	0	0	0	0.428645
	Dorea	4.96808	0.0880192	3.51947	0.297381	0.924858	0	0	2.48963
	Drancourtella	0	0	0	0	0	0	0	0.149635
	Duncaniella	0	0	0	0	0.113397	0	0	0.0959181
	Dysosmobacter	0	0.0512039	0	0.306372	0	0	0	0
	Eggerthella	0	0	0	0	0.0888916	0	0	0.111325
	Eggerthellaceae_norank	0	0	0	0	0	0	0	0.280804
	Eisenbergiella	0	0	0	0	0.302614	0	0.044072	0.716296
	Elusimicrobia_norank	0	0.0531252	0	0.0853457	0	0	0.0605588	1.26049
	Emergencia	0	0	0	0.007616	0	0	0.338624	0.0982643
	Endomicrobium	0.0890338	0	0	0	0	0	0	0.0872437
	Entamoeba	0	0	0	0	0	0	0	0.0172121
	Enterorhabdus	0	0	0	0	0	0	0	0.0534758
	Enteroscipio	0	0	0	0	0	0	0	0.0418566
	Erysipelatoclostridium	0.0976026	0	0	0	0	0	0.153968	0.0291502
	Erysipelotrichaceae_norank	0	0	0.0236913	0.536142	0	0	0.113894	1.31662
	Erysipelotrichia_norank	0	0	0	0	0.0919598	0	0	0.13422
	Escherichia	0	0	0	0	0	0	0.471175	0
	Eubacteriaceae_norank	0	0	0.346901	0	0	0	0.455495	0.0182602
	Eubacterium	1.46351	0.80932	0.563809	1.57428	0.510734	0	0.3649	5.60557
	Faecalibacterium	0	0	0	0	0.0578642	0	0.0837224	2.74465
	Faecalicatena	0	0	0	0	0	0	0.0845784	0.119412
	Fervidicella	0	0	0.277038	0	0	0	0	0
	Fervidicola	0	0	0	0	0	0	0	0.0448675
	Fibrobacter	0	0	0	0	0	1.97682	0	1.88856
	Finegoldia	0	0	0	0	0.0320921	0	0	0.0319291
	Firmicutes_norank	0.80279	0.362136	0.189003	0.780738	19.4135	0	5.387	36.4361
	Flavobacteriales_norank	0	0	0	0	0	0.0983442	0	0.0827449
	Flavonifractor	0	0	0	0	0.259553	0	0	1.3532
	Flexilinea	0	0	0	0	0	0	0	0.04102
	Fonticella	0	0	0	0	0	0	0	0.0204479
	Fournierella	0	0	0	0	0	0	0	0.322411
	Fretibacterium	0	0	0	0	0	0	0	0.0536052
	Frisingicoccus	0.116625	0	0	0.469761	0	0	0	0
	Fusicatenibacter	0	0	0	0	0	0	0	0.345069
	Fusobacterium	0	0	0	0	0	0	0	0.316232
	Gabonibacter	0	0	0	0	0	0	0	0.111989
	Gallionella	0	0.0581779	0	0.0900756	0	0	0	0
	Garciella	0	0	0	0	0	0	0	0.0554994
	Gemmatimonadetes_norank	0	0	0	0	0	0	0	0.0140217
	Gemmiger	0	0	0	0	0	0	0	0.400462
	Geobacillus	0	0	0	0	0	0	0.0891221	0
	Geobacter	0	0	0	0	0	0	0	0.0375256
	Geosporobacter	0.0185641	0	0.0258381	0	0	0	0	0
	Gordonibacter	0	0	0	0	0.0538624	0	0	0.0341068
	Halanaerobium	0	0	0	0	0	0	0.115403	0.460286
	Halarcobacter	0	0	0	0	0	0	0	0.0151985
	Halobacteroides	0	0	0	0	0	0	0	1.22041
	Halodesulfovibrio	0	0	0	0	0	0	0	0.0330604
	Haloimpatiens	0	0	0	0	0	0	0	0.0400996
	Halothermothrix	0	0	0	0	0.97038	0	0	0.0279364
	Harryflintia	0	0	0	0	0	0	0.0402918	0
	Hathewaya	0	0	0	0	0	0	3.11771	0
	Helicobacter	0.064392	0.0687256	0.0708396	0.0988286	0	0	0	0.165085
	Herbinix	0	0	0	0	0	0	0.740758	0
	Hespellia	0.906459	1.17598	0	0	0	0	0	0
	Holdemania	0	0	0	0	0	0	0.433232	0.0408072
	Hungateiclostridium	0.618658	0.752885	0.465021	0.739866	0	0	0	0.0115629
	Hungatella	0	0	0	0	0	0	1.6107	0
	Hydrogenoanaerobacterium	0	0	0	0	0	0	0.103645	0.506206
	Ignavibacteriales_norank	0	0	0	0	0	0	0	0.0304788
	Inediibacterium	0	0	0	0	0	0	0	0.297391
	Intestinibacillus	0.128962	0.10302	0	0.117689	0.0688398	0	0	0.0495803
	Intestinibaculum	0	0	0	0	0	0	0.844155	0
	Intestinimonas	0.0630146	0.0640271	0	0.322801	0	0	0	0.188876
	Kineothrix	0	0	0	0	0	0	0	0.5837
	Labrenzia	0.0771705	0	0	0	0	0	0	0
	Laceyella	0	0	0	0	0	0	0	0.0246948
	Lachnoclostridium	0.142845	0.206906	0.117537	3.52232	1.76961	0	0.621243	3.05367
	Lachnospira	0	0	0	0	0.159989	0	0	0.0572865
	Lachnospiraceae_norank	15.6857	15.5011	6.16715	11.0102	15.7801	0	9.69363	36.4204
	Lachnotalea	0.0273898	0	0	4.21004	0.897696	0	0.0509089	0.119344
	Lactonifactor	0	0	0	0.403656	0.104132	0	0	0
	Lawsonibacter	0	0	0	0	0	0	0	1.90527
	Lentisphaerae_norank	0	0	0	0	0	0	0	0.0534168
	Lentisphaeria_norank	0	0	0	0	0	0	0	0.189604
	Leptolinea	0	0	0	0	0	0	0	0.075794
	Longibaculum	0	0	0	0	0	0	0.197849	0.831486
	Longilinea	0	0	0	0	0	0	0	0.195341
	Lutispora	0	0	0	0	0	0	0	0.190872
	Lysinibacillus	0	0	0	0	0	0	0	0.0128745
	Mahella	0	0	0	0	0	0	0	0.0686652
	Mailhella	0	0	0	0	0	0.349029	0	0.59117
	Marasmitruncus	0	0	0	0	0	0	0	0.0950803
	Marinilabiliales_norank	0	0	0	0	0.327917	0	0	0
	Marvinbryantia	0	0	0	0	0	0	0	0.0372305
	Massilimaliae	0	0	0	0	0	0	0	0.0385415
	Massilioclostridium	0	0	0	0	0	0	0.582153	0.38509
	Mediterranea	0	0	0	0	0	0	0	0.40084
	Mediterraneibacter	0	0	0	0	0.157726	0	0	0
	Megasphaera	0	0	0.0299749	0.0680231	0	0	0	0.0558156
	Merdimonas	0	0	0	0	0	0	0	0.0496801
	Methanobacteriales_norank	0.0378586	0	0	0	0	0	0	0
	Methanobrevibacter	11.5687	10.2031	6.26496	9.78036	0	0	0	0
	Methanocorpusculum	0.377802	0.364958	0.249767	0.490386	0	0	0	0
	Methanomassiliicoccales_norank	0.0703563	0	0.0333772	0	0	0	0	0
	Methanomicrobia_norank	0	0	0	0	0	0	1.39689	0.115023
	Methanosarcina	0	0	0	0	0	0	0	0.23665
	Methanothermobacter	0	0	0	0.0226681	0	0	0	0
	Methylovirgula	0	0	0	0	0	0	0	0.0389642
	Moorella	0	0	0.0301893	0	0	0	0	0.0338941
	Mordavella	0	0	0	0	0	0	0	0.441336
	Muribaculaceae_norank	0	0	0	0	0.391642	0	0	2.41546
	Muribaculum	0	0	0	0	0	0	0	0.776587
	Mycolicibacterium	0	0	0	0	0	0	0	0.0261066
	Mycoplasma	0	0	0	0	0	0	0	10.3979
	Natranaerobius	0	0	0	0	0	0	0	0.0340329
	Natranaerovirga	0	0	0	0.0122104	0	0	0	0.12381
	Neglecta	0	0	0	0	0	0	0.0214127	0.197914
	Neofamilia	0	0	0	0	0	0	0	0.0323263
	Niameybacter	0	0	0	0	0	0	0	0.0223005
	Olsenella	0	0	0	0	0	0	0	0.0278406
	Opitutae_norank	0	0	0	0	0	0	0	0.0203597
	Orenia	0	0	0	0	0	0	0	1.20385
	Oribacterium	0	0	0	0	0	0	0	0.567687
	Ornatilinea	0	0	0	0	0	0	0	0.552665
	Oscillibacter	0.984265	0.919707	0.648982	0.554806	1.53977	0	0	5.26983
	Oxalobacter	0	0	0	0	0	0	0	0.199348
	Paenibacillus	0	0	0	0	0	0	0	0.0250287
	Paludibacter	0	0	0	0	0.0682901	0	0	0
	Papillibacter	0	0	0	0	0	0	0	2.96547
	Parabacteroides	0	0	0	0	0.653798	0	0	0.217176
	Paraeggerthella	0	0	0	0	0	0	0	0.157162
	Paraliobacillus	0	0	0	0	0	0	0	0.0236033
	Paramaledivibacter	0	0	0	0	0	0	0	0.0303166
	Paraprevotella	0	0	0	0	0	0	0	0.0108575
	Parasporobacterium	0	0	0	0	0	0	0	0.0142969
	Pelosinus	0	0	0	0	0.0823373	0	0	0.0129371
	Peptoclostridium	0	0	0	0	0	0	0	0.0147359
	Peptococcaceae_norank	0	0	0.372371	0.561922	0.142165	0	0	0.221848
	Peptoniphilus	0	0	0	0	0	0	0	0.0812104
	Peptostreptococcaceae_norank	0	0	0	0	0	0	0	0.413036
	Persicobacter	0	0	0	0	0.0298878	0	0	0
	Petroclostridium	0.751842	0	0.0673738	1.42287	0.301343	0	0	6.16109
	Petrotoga	0	0	0	0	0	0	0	0.0387509
	Phascolarctobacterium	0	0	0	0	0	0	0	3.3735
	Planctomycetaceae_norank	0	0	0	0	0	0	0	0.848526
	Planctomycetes_norank	0	0	0	0	0	0	1.30682	0.642598
	Porphyromonadaceae_norank	0	0	0	0	8.33174	0	0	13.8304
	Porphyromonas	0	0	0	0	0	0	0	0.192716
	Pradoshia	0	0	0	0.0104107	0	0	0	0.0106034
	Prevotella	0	0	0	0	20.9674	0	0	48.6908
	Prevotellaceae_norank	0	0	0	0	4.94353	0	0	5.13945
	Propionispora	0	0	0	0	0	0	0	0.0428357
	Proteiniclasticum	0	0	0	0	0	0	0	0.0332587
	Proteobacteria_norank	0	0	0	0	0.103394	0	0	0
	Pseudobacteroides	0	0	0	0	0.450625	0	0	0
	Pseudobutyrivibrio	0	0	0	0	1.09237	0	0.0957979	1.53665
	Pseudoclostridium	0	0	0	0	0.332512	0	0	0
	Pseudoflavonifractor	0	0	0	0	0.38533	0	0.680597	6.56904
	Pyramidobacter	0	0	0	0	0	0	0	0.015316
	Rhizobiales_norank	0	0	0	0	0	0	0	0.0318416
	Rhizobium	0	0	0	0	0	0	0	0.168197
	Rhodopseudomonas	0	0	0	0	0	0	0	0.0267247
	Rikenellaceae_norank	0	0	0	0	0	0	0.197012	20.4902
	Robinsoniella	0	0	0	0	0	0	0.0767163	0
	Romboutsia	0.0408789	0.0432628	0	0	0	0	0.408762	0.533685
	Roseburia	1.95638	0.151009	0.639848	2.42991	2.06648	0	2.2228	4.71064
	Ruminiclostridium	0.0675221	0	0.314679	0	0	0	0	0.142828
	Ruminobacter	0.730167	0.614459	0.470576	0.69177	0	0.947858	0	0.684289
	Ruminococcaceae_norank	2.20895	2.34239	1.55394	2.24417	5.04185	0	39.2789	57.3519
	Ruminococcus	2.9741	2.36631	1.41608	2.17269	0	0	4.43062	15.4458
	Ruthenibacterium	0	0	0	0	0	0	0.212441	0.911699
	Sarcina	0.853398	0.65505	0.502565	0.315755	0.163956	0	0	1.34778
	Schaedlerella	0	0	0	1.88453	0	0	0	0.0567759
	Sediminispirochaeta	0	0	0	0	0	0	0	0.131837
	Senegalia	0	0	0	0	0	0	0	0.0201556
	Shigella	0	0	0	0	0	0.106271	0	0.164382
	Shuttleworthia	0	0	0	0	0	0	0	0.019747
	Solobacterium	0	0	0	0	0.0915884	0	0	0
	Sphaerochaeta	0	0	0	0	0	0	0	0.27991
	Sphingobacteriia_norank	0	0	0	0	0	0	0	0.245622
	Spirochaetales_norank	0	0	0	0	0	0	0	0.125266
	Spirochaetes_norank	0	0	0	0	0	0	0	0.004407
	Spirochaetia_norank	0	0	0	0	0	0	0	0.189163
	Sporobacter	0	0	0	0	0	0	0.0113656	1.20068
	Sporomusa	0	0	0	0	0	0	0	0.0361026
	Sporomusaceae_norank	0	0	0	0	0	0	0	0.504463
	Stomatobaculum	0	0	0	0	0	0	0	0.0864404
	Streptococcus	0	0	0	0	0	0	0	0.0215414
	Subdoligranulum	0	0	0	0	0	0	0	0.191484
	Succinatimonas	0	0	0	0	0	0.654896	0	0
	Succinivibrio	1.4527	1.25941	0	1.38721	0	0.269402	0	0.773849
	Succinivibrionaceae_norank	0	0	0	0	0	0.0470649	0	0.244024
	Sutterella	0.0180748	0	0	0	0	0	0	0
	Synergistes	0	0	0	0	0	0	0	0.0135421
	Syntrophobotulus	0	0	0	0	0	0	0	0.134345
	Syntrophomonas	0	0.0674509	0	0	0	0	0	0
	Tepidanaerobacter	0	0	0	0	0	0	0	0.262955
	Tepidibacter	0	0	0	0	0	0	0	0.101176
	Thermanaeromonas	0	0	0	0	0	0	0	0.0555959
	Thermoanaerobacter	0	0	0	0	0	0	0	0.0575187
	Thermoanaerobacterium	0	0	0	0	0.179497	0	0.0713368	0.0235716
	Thermogutta	0	0	0	0	0	0	0	0.251726
	Thermohalobacter	0	0	0	0	0	0	0.0406647	0.0157812
	Thermotoga	0	0	0	0	0	0	0	0.0233026
	Traorella	0	0	0	0	0	0	0.343886	0.0114005
	Treponema	0.304297	0.246375	0	0	6.37131	0	0	11.5294
	Trichococcus	0	0	0	0	0	0	0	0.0135913
	Turicibacter	0	0	0	0	0.206609	0	0	0.199987
	Tyzzerella	0.0865265	0	0	0	3.6059	0	0	2.74585
	Vallitalea	0	0	0.0468507	0	0	0	0	0.0228252
	Verrucomicrobia_norank	0	0	0	0	0	0	0	0.77035
	Williamwhitmania	0	0	0	0	0	0	0	0.0187761
	Xylanivirga	0	0	0	0	0	0	0	0.0175017

## Sheet: AB
Genus	K00626	K07516	K01825	K01782	K00074	K00023	K01715	K17865	K14534	K00209	K01692	K01034	K01035	K00929	K00634
Absiella	0	0	0	0	0.123747	0	0.140309	0	0	0	0	0	0	0	0
Acetatifactor	0.271776	0	0	0	0	0	1.75446	0	0	0	0	0	0	0.228661	0.652918
Acetoanaerobium	0	0	0	0	0	0	0	0	0	0	0	0	0	0.00794613	0
Acetobacterium	0	0.30423	0	0	0	0	0	0	0	0	0	0	0	0.0310573	0
Acetobacteroides	0.0485114	0	0	0	0	0	0	0	0	0	0	0	0.405013	0	0
Acholeplasmataceae_norank	0.0174408	0	0	0	0	0	0	0	0	0	0	0	0	0	0
Acidaminococcus	0	0	0	0	0	0	0	0	0.0636014	0	0	0	0	0.0440699	0
Acidobacteria_norank	0.109171	0	0	0	0	0	0	0	0	0	0	0	0	0	0
Aeromonas	0	0	0	0	0	0	0	0	0	0.248498	0	0	0	0	0
Afipia	0	0	0	0	0.0535302	0	0	0	0	0	0.0307639	0	0	0	0
Agathobacter	0	0	0	0	0	0	0	0	0	0	0	0	0	0.0122947	0
Alistipes	0	0	0	0	0.796537	0	0	0	0	0	0	26.0827	1.39512	10.6511	0
Alkalibaculum	0.733201	0	0	0	0	0	0	0	0	0	0	0	0	0	0
Alkaliphilus	0.053556	0	0	0	0	0	0	0	0	0	0	0	0	0	0
Alloprevotella	0	0	0	0	0	0	0	0	0	0	0	0	0	0.137332	0
Alterileibacterium	0	0	0	0	0	0	0	0	0	0	0	0	0	0.617555	0
Aminicella	0.037931	0	0	0	0	0	0	0	0	0	0	0	0	0	0
Aminipila	0.0671564	0	0	0	0.356999	0	0	0	0	0	0	0.653183	0.239552	0.0783644	0
Anaerobium	0.349695	0	0	0	0	0	0	0	0	0	0	0	0	0.162427	0
Anaerobutyricum	0	0	0	0	1.77487	0	0	0	0	0	0	0	0	0	0
Anaerocolumna	0.0456351	0	0	0	0	0	0	0	0	0	0	0	0	0	0
Anaerofustis	0.0179757	0	0	0	0	0	0	0	0	0	0	0	0	0	0
Anaerolactibacter	0	0	0	0	0	0	0	0	0	0	0	0	0	0.101813	0
Anaerolineaceae_norank	0	0	0	0	0	0	0	0	0	0	0.0541034	0	0	0	0
Anaeromassilibacillus	0	0	0	0	0	0	0	0	0	0	0.0648923	0	0	0	0
Anaeromicrobium	0	0	0	0	0	0	0	0	0	0	0	0	0	0.0753666	0
Anaerosacchariphilus	0	0	0	0	0	0	0	0	0	0.287236	0	0	0	0	0
Anaerosalibacter	0	0	0	0	0	0	0.0959956	0	0	0	0	0	0	0	0
Anaerosporomusa	1.54808	0	0	0	0	0	0	0	0	0	0	0	0	0	0
Anaerostipes	0	0	0	0	0	0	0.353962	0.287639	0	0	0	0	0	0	0
Anaerotignum	0	0	0	0	0	0	0	0	0.0910364	0	0	0	0	0	0
Anaerotruncus	0.27487	0	0	0	0	0	0	0	0	0	0.0745992	0	0	0.105784	0
Anaerovorax	0	0	0	0	0.0578152	0	0	0	0	0	0	0	0	0	0
Ancylomarina	0.0415719	0	0	0	0	0	0	0	0	0	0	0	0	0	0
Aneurinibacillus	0.0300098	0	0	0	0	0	0	0	0	0	0	0	0	0	0
Anoxybacillus	0	0	0	0	0	0	0	0	0	0	0	0	0	0.177157	0
Anoxybacter	0	0	0	0	0	0	0	0	0	0	0.0187955	0	0	0	0
Asinibacterium	0.0470901	0.0793229	0	0	0	0	0	0	0	0	0	0	0	0	0
Bacilliculturomica	0	0	0	0	0	0	0.671146	0	0	0	0.128577	0	0	0	0
Bacillus	1.34411	0.0278288	0	0	0.0330159	0	0	0.0162953	0	0	0.0854448	0	0	0.074938	0
Bacteria_norank	3.40226	0	0	0	39.0973	0	41.8163	0	0.0532891	0.00694625	0.0576398	9.99663	29.4855	28.7557	3.62144
Bacteroidales_norank	0	0	0	0	0	0	0	0	0	0	0	1.06481	1.18241	12.6036	0
Bacteroides	0	0	0	0	0	0	0	0	0	0	0	0	0	12.7668	0
Bacteroidetes_norank	0	0	0	0	0.0917098	0	0	0	0.10076	0	0	0	1.36476	12.961	0
Bacteroidia_norank	0	0	0	0	0	0	0	0	0	0	0	0	0	2.30146	0
Bariatricus	0	0	0	0	0	0	0.0485037	0	0	0	0	0	0	0	0
Bilophila	0	0	0	0	0	0	0	0	0	0	0	0	0	0.0451394	0
Blautia	0.565741	0	0	0	0.606614	0	0	0	0	0.0765393	0	0	0	1.39523	0
Bosea	0	0	0	0	0	0	0	0	0	0	0.132015	0	0	0	0
Brachyspira	0	0	0	0	0	0	2.77232	0	0	0	0.026709	0	0	0	0
Bradyrhizobium	0.990042	0.130164	0	0.320863	0.137389	0.443691	0	0	0.169376	0.131342	2.01415	0.168082	0.177249	0	0
Brevibacillus	0.307129	0	0	0	0	0	0	0	0	0	0.470742	0	0	0	0
Butyricicoccus	0	0	0	0	0	0	0	0	0.112102	0	0.025764	0	0	0	0
Butyricimonas	0	0	0	0	0.528779	0	2.93147	0	0.408523	0	0	1.3904	0	0.0180392	0
Butyrivibrio	4.65052	0	0	0	0.0165793	0	2.21787	0.497333	0	0	0.0499147	0	0	4.88393	2.05907
Caldanaerobacter	0	0	0	0	0.108488	0	0	0	0	0	0	0	0	0	0
Calderihabitans	0	0	0	0	0	0	0	0	0	0	0.0147478	0	0	0	0
Caldisalinibacter	0	0	0	0	0	0	0	0.0597792	0	0	0	0	0	0	0
Caldiserica_norank	0	0	0	0	0	0	0	0	0	0	0	0	0	0.0457564	0
Caldisericum	0	0	0	0	0	0	0	0	0	0	0	0	0	0.0411941	0
Caloranaerobacter	0	0	0	0	0.0242749	0	0.0428139	0	0	0	0	0	0	0	0
Caminicella	0	0	0	0	0	0	0.032287	0	0	0	0	0	0	0	0
candidate division WOR-3_norank	0	0	0	0	0	0	0	0	0	0	0.0959944	0	0	0	0
candidate division Zixibacteria_norank	0	0	0	0	0	0	0	0	0	0	0.0664489	0	0	0	0
Candidatus Abyssubacteria_norank	1.25313	0	0	0	0	0	0	0	0	0	0	0	0	0	0
Candidatus Frackibacter	0	0	0	0	0	0	0	0	0	0	0	0	0	0.0356561	0
Candidatus Gastranaerophilales_norank	0	0	0	0	0	0	0	0	0	0	0	0.412699	0	0	0
Candidatus Izimaplasma	0.0799111	0	0	0	0	0	0	0	0	0	0	0	0	0	0
Caproiciproducens	0	0	0	0	0	0	0	0	0	0	0.0128362	0	0	0	0
Catabacter	0	0	0	0	0	0	0	0	0.0793798	0.0791591	0	0	0	0	0
Cetobacterium	0	0	0	0	0	0	0	0	0	0	0	0.143418	0.0581746	0	0
Chitinophagaceae_norank	0.0509243	0	0	0	0	0	0.0803305	0	0	0	0	0	0	0	0
Chloroflexi_norank	0	0	0	0	0	0	0	0	0	0	0.186875	0	0	0	0
Christensenella	0.020644	0	0	0	0.0428161	0	0	0	0.0470549	0	0	0	0	0	0
Cloacibacillus	0.407427	0	0	0	0	0	0	0	0	0	0	0	0	0.137299	0
Clostridia_norank	0.728897	0	0	0	0.417691	0	0.291387	0.456279	0.429939	0	0.747333	0	0.3141	1.25014	0
Clostridiaceae_norank	0.157913	0	0	0	0	0	0.834629	0	0.0405096	0	0.0114824	0	0	1.80637	0
Clostridiales Family XIII. Incertae Sedis_norank	0.234956	0	0	0	0.0751043	0	0.126782	0	0	0	0	0	0	0.357128	0
Clostridiales_norank	1.16623	0	0	0	0.457074	0	2.65006	0.96542	1.39613	0.145991	0.408653	1.32021	0.0776086	12.0619	0.412584
Clostridioides	0	0	0	0	0	0	0	0	0.111174	0	0	0	0	0	0
Clostridium	4.68566	0	0	0	4.54795	0	6.28994	0.250683	0.109478	0.196889	0.5874	0.100275	0	4.30126	5.19907
Collinsella	0	0	0	0	0	0	0	0	0	0	0	0	0	0.0832842	0
Comamonadaceae_norank	0	0	0	0	0	0.0173081	0	0	0	0	0.0860898	0	0	0	0
Coprococcus	0.566289	0	0	0	0.782563	0	0.568378	0.117657	0.44115	0	0	0	0	0.0309173	0.223122
Corynebacterium	0	0	0	0	0.378879	0	0	0	0	0	0	0	0	0	0
Culturomica	0	0	0	0	0	0	0	0	0	0	0	0	1.70043	0	0
Deltaproteobacteria_norank	1.09976	0	0	0	0	0	0	0	0	0	0	0	0	0.019053	0
Desnuesiella	0	0	0	0	0	0	0	0.7507	0	0	0	0	0	0	0
Desulfatibacillum	0.336209	0	0	0	0	0	0	0	0	0	0	0	0	0	0
Desulfitobacterium	0.0333791	0	0	0	0	0	0	0	0	0	0	0	0	0	0
Desulfobacteraceae_norank	0.957323	0	0	0	0	0	0	0	0	0	0	0	0	0.679621	0
Desulfobacterium	0	0	0	0	0	0	0	0.036386	0	0	0	0	0	0	0
Desulfofundulus	0.105589	0	0	0	0	0	0	0	0	0	0	0	0	0	0
Desulfosporosinus	2.77702	0	0	0	0	0	0	0	0	0	0.0504637	0	0	0.0256247	0
Desulfotignum	0.0508351	0	0	0	0	0	0	0	0	0	0	0	0	0	0
Desulfotomaculum	0	0	0	0	0.0500536	0	0	0	0	0	0	0	0	0	0
Desulfurispora	0	0	0	0	0.180471	0	0	0	0	0	0	0	0	0	0
Desulfuromonas	0	0	0	0	0	0	0	0	0	0	0.0806198	0	0	0	0
Desulfuromusa	0	0	0	0	0	0	0	0	0	0	0.664131	0	0	0	0
Dethiosulfatibacter	0.846926	0.301369	0	0	0	0	0	0.41725	0	0	0	0	0	0	0
Dielma	0	0	0	0	0	0	0	0	0	0	0	0	0	0.0435726	0
Dorea	0.089316	0	0	0	0.0521525	0	0	0	0	0	0	0	0	0.0205139	0
Dysosmobacter	0.298944	0	0	0	0	0	0.0472269	0	0.135885	0	0	0	0	0	0
Eisenbergiella	0.0445824	0	0	0	0.0930524	0	0	0	0	0	0	0	0	0.0769108	0
Elusimicrobia_norank	0	0	0	0	0	0	0	0	0	0	0	0	0	0.0457213	0
Elusimicrobium	0	0	0	0	0	0	0	0	0	0	0	0	0	0.0355987	0
Emergencia	8.69769	0	0	0	0.191267	0	0.0274454	0.2404	0.880944	0	0	0	0	0.103457	0
Enhydrobacter	0	0	0	0	0	0	0	0	0	0	0.203453	0	0	0	0
Enorma	0	0	0	0	0	0	0	0	0	0	0	0	0	0.0542042	0
Enterococcus	0.0755479	0	0	0	0	0	0	0	0	0	0	0	0	0	0
Erysipelatoclostridium	0.541236	0	0	0	0	0	0	0	0	0	0	0	0	0	0
Erysipelotrichaceae_norank	0.129475	0	0	0	0	0	0	0	0	0	0	0	0	0.989635	0
Escherichia	0.29802	0	0	0.127987	0.118673	0	0	0	0	0	0	0	0	0	0
Eubacteriaceae_norank	0	0	0	0	0	0	0	0	0	0	0	0	0	0.0546509	0
Eubacterium	2.21819	0	0	0	1.42478	0	20.0108	0	0.585177	0.0482624	1.1131	0	0	0.594939	0.638881
Evtepia	0	0	0	0	0.63186	0	0.863644	0	0	0	0.0888967	0	0	0	0
Extibacter	0	0	0	0	0	0	0	0	0	0	0	0	0	0.0223634	0
Faecalibacterium	0.134225	0	0	0	0	0	0.0750299	0	0	0	0	0	0	0.0203203	0
Faecalicatena	0.116134	0	0	0	0.0680259	0	0	0	0	0	0	0	0	0.187216	0
Fibrobacter	0	0	0	0	0	0	0	0	0	1.56609	0	0	0	0	0
Fictibacillus	0	0	0	0	0	0	0	0	0	0	0	0	0	0.0555098	0
Firmicutes_norank	7.9272	0	0	0	3.88031	0	1.46544	0	1.03117	0.0644202	0.336247	0	0.0799368	6.80406	0.75875
Flavobacteriales_norank	0.0781125	0	0	0	0	0	0	0	0	0	0	0	0	0.118851	0.0810549
Flavonifractor	3.4684	0	0	0	0.187159	0	0.286248	0.160257	0.609281	0	0.158715	0.367879	0.177447	0.640478	0
Frisingicoccus	1.59285	0	0	0	1.16494	0	1.47802	0.319378	0	0	0.530951	0	0	0	0
Fusobacterium	0.150157	0	0	0	0.136252	0	0.266317	0.146132	0	0	0	0	0	0	0
Gammaproteobacteria_norank	0	0	0	0	0	0	0	0.0269549	0	0	0	0	0	0	0
Garciella	0	0	0	0	0	0	0.716763	0	0	0	0	0	0	0	0
Gemmiger	0	0	0	0	0	0	0	0	0	0	0	0	0	0.202174	0
Geobacillus	0.186009	0	0	0	0	0	0	0	0	0	0.0442745	0	0	0	0
Geosporobacter	0.061102	0.411863	0	0	0	0	0	0	0	0	0	0	0	0	0
Gudongella	0	0	0	0	0	0	0	0	0.172079	0	0	0	0	0	0
Haloimpatiens	0.0561356	0	0	0	0	0	0	0	0	0	0	0	0	0	0
Halteria	0.0589468	0	0	0	0	0	0	0	0	0	0	0	0	0	0
Harryflintia	0	0	0	0	0	0	0	0	0	0	0	0	0	0.0131253	0
Holophagaceae_norank	0	0	0	0	0	0	0	0	0	0	0	0	0	0.017477	0
Hydrobacter	0.996908	0.511821	0	0	0.485892	0	0	0	0	0	0	0	0	0	0
Hydrogenoanaerobacterium	0	0	0	0	0	0	0	0	0	0.0926051	0	0	0	0	0
Inediibacterium	0	0	0	0	0	0	0	0	0	0	0	0	0.0656869	0	0
Inordinaticella	0.112239	0	0	0	0	0	0	0	0	0	0	0	0	0	0
Intestinibacillus	0.148426	0	0	0	0	0	0	0	0.142198	0	0.104829	0	0	0	0
Intestinimonas	0.497658	0	0	0	0	0	0.0417379	0.469412	0	0	0.0980201	0	0.222651	0	0
Keratinibaculum	0	0	0	0	0	0	0	0	0	0	0	0	0	0.0380298	0
Kineothrix	0.151182	0	0	0	0	0	0.0573141	0	0	0	0	0	0	0	0
Laceyella	0	0	0	0	0	0	0	0	0	0.0829261	0	0	0	0	0
Lachnoanaerobaculum	0	0	0	0	0	0	0	0	0	0	0.0144033	0	0	0	0
Lachnoclostridium	0.666369	0	0	0	0.131661	0	0.318532	0	0.0749976	0	0.171659	0	0	0.263473	0
Lachnospiraceae_norank	18.0649	0	0	0	4.71419	0	21.9911	0.986083	0.321713	0.158404	1.08912	0	0	26.9406	22.9555
Lactimicrobium	0	0	0	0	0	0	0	0	0	0	0	0	0	0.0284651	0
Lactobacillus	0.916913	0	0	0	0	0	0	0	0	0	0	0	0	0	0
Lactonifactor	0	0	0	0	0	0	0	0	0	0	0	0	0	0.0887352	0
Lawsonibacter	0.143356	0	0	0	0.258184	0	0.153726	0	0	0	0	0	0	0.0172369	0
Lysinibacillus	0	0	0	0	0	0	0	0	0	0	0.0582728	0	0	0	0
Maledivibacter	0	0	0	0	0	0	0	0	0	0	0	0	0	0.0154683	0
Marinifilaceae_norank	0	0	0	0	0	0	0	0	0	0	0	0	0	0.0179242	0
Marinifilum	0.0208156	0	0	0	0	0	0	0	0	0	0	0.124506	0	0	0
Marinilabiliaceae_norank	0	0	0	0	0	0	0	0	0	0	0	0	0	0.0138274	0
Marinilabiliales_norank	0	0	0	0	0	0	0	0	0	0	0	0.0834106	0	0	0
Marinisporobacter	0	0	0	0	0	0	0	0	0.163562	0	0	0	0	0.0546773	0
Marinitoga	0	0	0	0	0	0	0	0	0	0	0	0	0	0.0340454	0
Massilicoli	0.390741	0	0	0	0.266697	0	0.0504066	0	0	0	0	0	0	0	0
Massilimaliae	0	0	0	0	0	0	0	0	0	0.0134196	0	0	0	0	0
Massilioclostridium	0	0	0	0	0	0	0	0	0	0.0997496	0	0	0	0	0
Mediterraneibacter	0	0	0	0	0.148507	0	0.163113	0	0	0	0	0	0	0	0
Megamonas	0	0	0	0	0	0	0	0	0	0.00745769	0	0	0	0	0
Mesocricetibacter	0.480087	0	0	0	0	0	0	0	0	0	0	0	0	0	0
Mesorhizobium	0	0.0536221	0	0.0881764	0.0771047	0.0847867	0	0	0	0	0.122022	0	0	0	0
Methylovirgula	0.0395619	0	0	0	0	0	0	0	0	0	0	0	0	0	0
Mobilibacterium	0	0	0	0	0	0	0	0	0	0	0	0	0	0.0270667	0
Mogibacterium	0	0	0	0	0	0	0	0	0	0	0	0	0	1.81865	0.127429
Muribaculaceae_norank	0	0	0	0	0	0	0	0	0	0	0	0	0	0.300148	0
Mycolicibacterium	0.114037	0	0	0	0	0	0	0	0	0	0.0257234	0	0	0	0
Nephromyces	0.0754045	0	0	0	0	0	0	0	0	0	0	0	0	0	0
Niameybacter	0	0	0	0	0	0	0	0	0	0	0	0	0	0.0269546	0
Odoribacter	0	0	0	0	2.97605	0	0	0	0	0	0	1.29125	2.14168	0	0
Olsenella	0	0	0	0	0	0	0	0	0	0	0	0	0	0.448499	0
Opitutae_norank	0	0	0	0	0	0	0	0	0	0.0365265	0	0	0	0	0
Oribacterium	0.0498728	0	0	0	0	0	0	0	0	0	0	0	0	0.125882	0
Oscillibacter	2.96859	0	0	0	4.07279	0	6.32011	0	5.90324	0	0.217926	0	0	8.21548	0
Oxobacter	0.575472	0	0	0	0	0	0	0	0	0	0	0	0	0	0
Paenibacillus	0	0	0	0	0	0	0	0	0	0.0419426	0.0481914	0	0	0	0
Paeniclostridium	0	0	0	0	0	0	0	0	0	0	0	0	0	0.0539117	0
Papillibacter	0	0	0	0	0	0	0	0.132529	0	0	0.616355	0	0	0	0
Parageobacillus	0.670257	0	0	0	0	0	0	0	0	0	0	0	0	0	0
Parasporobacterium	0	0	0	0	0	0	0	0	0	0	0	0	0	0.498872	0
Pedobacter	0	0	0	0	0	0	0	0	0	0.107361	0	0	0	0	0
Pelolinea	0	0	0	0	0	0	0	0	0	0	0	0	0	0.288492	0
Peptoanaerobacter	0	0	0	0	0	0	0	0.153976	0	0	0	0	0	0	0
Peptoclostridium	0	0	0	0	0	0	0	0	0	0	0	0	0	0.0555216	0
Peptococcaceae_norank	0	0	0	0	0	0	0	0	0	0	0.10638	0	0	0	0
Peptostreptococcaceae_norank	0.13715	0	0	0	0.174379	0	0.0997473	0	0	0	0	0	0	0.253257	0
Peptostreptococcus	0	0	0	0	0	0	0	0	0	0	0	0	0	0.591874	0
Peronospora	0.234539	0	0	0	0	0	0	0	0	0	0	0	0	0	0
Phocaeicola	0	0	0	0	0	0	0	0	0	0	0	0	0	0.160009	0
Phyllobacterium	0	0	0	0	0	0	0	0	0	0	0.0194717	0	0	0	0
Pleomorphomonas	0.251261	0	0	0	0	0	0	0	0	0	0	0	0	0	0
Porphyromonadaceae_norank	0	0	0	0	0	0	0	0	0	0	0	0	0	2.09698	0
Porphyromonas	0	0	0	0	0	0	0	0	0.2243	0	0	0	0	0	0
Prevotella	0	0	0	0	0	0	0	0	0	0	0	0	0	43.3062	0
Prevotellaceae_norank	0	0	0	0	0	0	0	0	0	0	0	0	0	2.16258	0
Proteobacteria_norank	0	0	0	0	0	0	0	0	0	0	0.0874836	0	0	0	0
Pseudobutyrivibrio	1.33755	0	0	0	0.566541	0	1.47967	0	0	0	0.0783141	0	0	0.448206	0
Pseudodesulfovibrio	0	0	0	0	0	0	0	0	0	0	0.325427	0	0	0	0
Pseudoflavonifractor	0.161565	0	0	0	1.0434	0	0.753803	0	0.0749302	0	0.19601	0	0	1.11715	0
Pseudoramibacter	0	0	0	0	0	0	0	0	0.197843	0	0	0	0	0	0
Rhizobium	0.322686	0	0	0	0.165899	0	0	0	0	0	0.257214	0	0	0	0
Rhodanobacter	0.160542	0.0950295	0	0.0679756	0	0.150725	0.0849496	0	0	0.11174	0	0	0	0	0
Rhodoplanes	0	0	0	0	0	0	0	0	0.0622149	0	0	0	0	0	0
Rickettsiales_norank	0	0	0	0	0	0.0927259	0	0	0	0	0	0	0	0	0
Rikenellaceae_norank	0	0	0	0	0	0	0	0	0	0	0	0	0	14.315	0
Romboutsia	0	0	0	0	0.139246	0	0.0844064	0	0	0	0	0	0.0648472	0.719701	0.598034
Roseburia	0.488007	0	0	0	0.0830694	0	0.367769	0	0	0.108761	0	0.0333188	0	5.05062	0.403588
Ruminiclostridium	0	0	0	0	0	0	0	0	0	0	0	0	0	0.0292793	0
Ruminobacter	0	0	0	0	0	0	0	0	0	0.676501	0	0	0	0	0
Ruminococcaceae_norank	0.86114	0	0	0	0.192276	0	0.264465	0	0	0.264712	0.149005	0	0	12.2434	0
Ruminococcus	0.108762	0	0	0	0.170117	0	0	0	0.179036	0.597918	0	0	0	0.0293822	0
Sanguibacteroides	0.0721406	0	0	0	0	0	0	0	0.655189	0	0	0.0261493	0	0	0
Sarcina	0.334107	0	0	0	0	0	0.253289	0	0	0	0.115026	0	0	0	0
Schaedlerella	0	0	0	0	0	0	0	0	0	0	0	0	0	0.0215058	0
Sedimentibacter	0.181146	0	0	0	0	0	0	0	0.0707538	0	0	0	0	0	0
Sediminibacterium	0	0	0	0	0.0863306	0	0	0	0	0	0	0	0	0	0
Shigella	0	0	0.200238	0	0	0	0	0	0	0	0.106601	0	0	0	0
Siculibacillus	0	0	0	0	0	0	0	0	0	0	0	0	0	0.769513	0
Slackia	0	0	0	0	0	0	0	0	0	0	0	0	0	0.0383894	0
Smithella	0.33927	0	0	0	0	0	0	0	0	0	0	0	0	0	0
Sphaerochaeta	0	0	0	0	0	0	0	0	0	0	0	0	0	0.128013	0
Spirochaetales_norank	0	0	0	0	0	0	0	0	0	0	0	0	0	0.0199622	0
Spirochaetes_norank	0.297987	0	0	0	0	0	0	0	0	0	0	0	0	0	0
Spirochaetia_norank	0	0	0	0	0	0	0	0	0	0.189388	0	0	0	0	0
Sporanaerobacter	0	0	0	0	0	0	0.0498666	0	0	0	0	0	0	0.321916	0
Sporobacter	1.35253	0	0	0	0	0	0	0	0	0	0	0.123714	0	0.481844	0
Sporomusa	0.0587721	0	0	0	0	0	0	0	0	0	0	0	0	0	0
Sporosarcina	0.0213814	0	0	0	0	0	0	0	0	0	0	0	0	0	0
Stomatobaculum	0	0	0	0	0	0	0	0	0	0	0.0464443	0	0	0	0
Streptococcus	0	0	0	0	0	0	0	0.00935519	0	0	0	0	0	0	0
Subdoligranulum	0.0579757	0	0	0	0	0	0.183963	0	0	0	0.0204431	0	0	0	0.0236352
Succinatimonas	0	0	0	0	0	0	0	0	0	0.536189	0	0	0	0	0
Succinivibrio	0	0	0	0	0	0	0	0	0	0.307016	0	0	0	0	0
Syntrophomonas	0	0	0	0	0	0	0	0	0.0166091	0	0.0718003	0	0	0	0
Syntrophothermus	0	0	0	0	0	0	0.0486917	0	0	0	0	0	0	0	0
Tenericutes_norank	0.0592457	0	0	0	0	0	0	0.050264	0	0	0	0	0	0	0
Tepidibacter	0	0	0	0	0	0	0	0	0	0	0	0	0	0.0223038	0
Tepidimicrobium	0	0	0	0	0	0	0	0	0	0	0	0	0.0671946	0	0
Terrisporobacter	0	0	0	0	0	0	0	0.0717642	0	0	0	0.0761716	0	0	0
Thalassospira	0	0	0	0	0	0	0	0.00839394	0	0	0	0	0	0	0
Thaumarchaeota_norank	0	0	0	0	0	0	0	0	0	0	0.0146882	0	0	0	0
Thermoanaerobacterium	0	0	0	0	0.10122	0	0	0	0	0	0	0	0	0	0
Thermoanaerosceptrum	0.0487583	0.0386269	0	0	0	0	0.0370345	0	0	0	0	0	0	0	0
Thermobrachium	0	0	0	0	0.133014	0	0	0	0	0	0	0	0	0	0
Thermotalea	0	0	0	0	0	0	0	0.0263402	0	0	0	0	0	0	0
Tistrella	0.0945322	0	0	0	0	0	0	0	0	0	0	0	0	0	0
Treponema	0.0307685	0	0	0	0	0	0	0	0	10.2958	0	0	0	0.10059	0
Ureibacillus	0	0	0	0	0	0	0	0	0	0	0.0505509	0	0	0	0
Verrucomicrobia_norank	0	0	0	0	0	0	0	0	0	0.146066	0	0	0	0	0
Vibrionimonas	0	0	0	0	0	0	0.504163	0	0	0	0	0	0	0	0
Vitrella	1.28923	0	0	0	0	0	0	0	0	0	0	0	0	0	0
Vulcanibacillus	0.0668141	0	0	0	0	0	0	0	0	0	0	0	0	0	0
Youngiibacter	0.0886796	0	0	0	0	0	0	0	0	0	0	0	0	0	0

## Sheet: PLP
Genus	K00016	K01026	K20626	K20627	K19745
Acholeplasma	0.260472	0	0	0	0
Afipia	0	0	0	0	0.0564339
Agathobaculum	0	0.658573	0	0	0
Alkaliphilus	0	0.0650475	0	0	0
Alphaproteobacteria_norank	0.113767	0	0	0	0
Anaerobacterium	0.0381198	0	0	0	0
Anaerobium	0	1.01533	0	0	0
Anaerobranca	0	0.160545	0	0	0
Anaeromassilibacillus	0.055705	0	0	0	0
Anaeroplasma	0.0504363	0	0	0	0
Anaerosacchariphilus	0	0.0292361	0	0	0
Anaerostipes	0	0.0633651	0	0	0
Anaerotignum	0	1.73031	1.81015	0	0
Anaerotruncus	2.16554	0.946142	0	0	0
Azospirillum	0.216893	0	0	0	0
Bacillus	2.82548	0	0	0	0
Bacteria_norank	35.1353	1.05653	0	0	0
Bacteroidetes_norank	0.297258	0	0	0	0
Bifidobacterium	0.242275	0	0	0	0
Blautia	5.74725	0.256967	0	0	0
Bradyrhizobium	0	0	0	0	0.118187
Butyricicoccus	0	0.29134	0	0	0
Butyrivibrio	8.2642	0	0	0	0
Candidatus Desantisbacteria_norank	0	0.0250591	0	0	0
Candidatus Saccharibacteria_norank	6.08598	0	0	0	0
Candidatus Soleaferrea	0.0890012	0	0	0	0
Caproiciproducens	0.0555291	0.044445	0	0	0
Catabacter	0.115629	0	0	0	0
Catonella	1.26525	0	0	0	0
Christensenella	3.30007	0.304105	0	0	0
Cloacibacillus	0	1.00206	0	0	0
Clostridia_norank	2.19119	1.82321	0	0	0
Clostridiaceae_norank	0	0.0980048	0	0	0
Clostridiales_norank	21.3679	0.972962	0	0	0
Clostridiisalibacter	0	0.0894573	0	0	0
Clostridium	9.18717	1.43819	0	0	0
Coprobacillus	0.323582	0	0	0	0
Coprococcus	0	0.825186	0.0590413	0	0
Cyanobacteria_norank	0.0304896	0	0	0	0
Desulfatitalea	0	0.131366	0	0	0
Desulfobulbus	0	0	0	0	0.0162138
Desulfosporosinus	0	0.135473	0	0	0
Dethiosulfatibacter	0	0.0470377	0	0	0
Dorea	0.504435	0.231154	0	0	0
Erysipelotrichaceae_norank	0	0.154443	0	0	0
Erysipelotrichia_norank	0.109307	0	0	0	0
Eubacteriaceae_norank	0.321418	0	0	0	0
Eubacterium	2.41787	2.03378	0	0	0
Faecalibacterium	0.0390918	0.0609428	0	0	0
Faecalicatena	1.00434	0.0440061	0	0	0
Firmicutes_norank	25.19	0.705432	0	0	0
Flavonifractor	0.103909	1.22663	0	0	0
Frisingicoccus	0	3.63981	1.55627	1.04856	0
Fusobacterium	0.0593839	0	0	0	0
Holdemania	0.0839924	0	0	0	0
Hungateiclostridium	1.83509	0	0	0	0
Intestinibacillus	0.162554	0	0	0	0
Intestinimonas	0	4.23407	0	0	0
Lachnoclostridium	0.229577	1.66247	0	0	0
Lachnospiraceae_norank	6.56617	3.91112	0	0	0
Maledivibacter	0	0.0952153	0	0	0
Marasmitruncus	3.8004	0	0	0	0
Marvinbryantia	0.0490361	0	0	0	0
Merdimonas	0.264049	0	0	0	0
Mesorhizobium	0	0	0	0	0.0423879
Murimonas	0.0415862	0.679153	0	0	0
Mycoplasma	0.0880381	0	0	0	0
Neglecta	2.17158	0	0	0	0
Neobittarella	0.260851	0	0	0	0
Oribacterium	0.386127	0	0	0	0
Oscillibacter	0	0.580483	0	0	0
Papillibacter	0	0.0852182	0	0	0
Pelosinus	0	0.0318129	0	0	0
Pelotomaculum	0	0.859229	0	0	0
Peptococcaceae_norank	0	0.0347305	0	0	0
Petroclostridium	0.271525	0	0	0	0
Proteobacteria_norank	0.112869	0	0	0	0
Pseudobutyrivibrio	1.61189	0	0	0	0
Pseudoclostridium	0.0532128	0	0	0	0
Pseudoflavonifractor	0.0632439	0	0	0	0
Pseudoscardovia	0.694504	0	0	0	0
Pygmaiobacter	0.112187	0	0	0	0
Rhodanobacter	0	0	0	0	0.0764522
Romboutsia	0.494459	0	0	0	0
Roseburia	2.12592	0	0	0	0
Ruminiclostridium	0.107775	0	0	0	0
Ruminococcaceae_norank	13.1994	0.768092	0	0	0
Ruminococcus	8.08483	0.182889	0	0	0
Ruthenibacterium	0.145686	0	0	0	0
Sarcina	0.0463674	0.442681	0.0555382	0	0
Shigella	0	0	0	0	0.126864
Sporobacter	0	0.60558	0	0	0
Sporolituus	0	0.178237	0	0	0
Stomatobaculum	0.165852	0	0	0	0
Subdoligranulum	0.0803032	0	0	0	0
Synergistes	0	0.0607344	0	0	0
Terrisporobacter	0	0.102035	0	0	0
Thermanaeromonas	0	0.0668672	0	0	0
Treponema	7.78597	0	0	0	0
Turicibacter	0.215076	0	0	0	0
Tyzzerella	0	0	0	1.81124	0
Youngiibacter	0	0.0299839	0	0	0

## Sheet: PSP
Genus	K01958	K01960	K00024	K00116	K01676	K01677	K01678	K01679	K00244	K00245	K00246	K00247	K01900	K01902	K01903	K01848	K01849	K05606	K11264
Acetanaerobacterium	0	0	0	0	0	0	0	0.0844416	0	0	0	0	0	0	0	0	0	0	0
Acetivibrio	0	0	0	0	0	0	0.0563152	0	0	0	0	0	0	0	0	0	0	0	0
Acholeplasmataceae_norank	0	0	0	0	0	0.202792	0	0	0	0	0	0	0	0	0	0	0	0	0
Acidaminococcaceae_norank	0	0	0	0	0	0.116914	0	0	0	0	0	0	0	0.157745	0.441321	0.350123	0	0	0
Acidaminococcus	0	0	0	0	0	0	0	0.132322	0	0	0	0	0	0	0	0	0	0	0
Actinobacteria_norank	0	0	0.0414208	0	0	0	0	0	0	0	0	0	0	0	0	0	0	0	0
Acutalibacter	0	0	0	0	0	0	0.218818	0	0	0	0	0	0	0	0	0	0	0	0
Aeromonas	0	0	0	0	0	0	0	0	0	0.26441	0	0	0	0	0	0	0	0	0
Afipia	0	0	0	0	0	0	0	0	0	0	0	0	0	0.0549556	0	0	0	0	0
Agathobacter	0	0	0	0	0	0.0936793	0	0	0	0	0	0	0	0	0	0	0	0	0
Agathobaculum	0.121059	0	0	0	0	0	0	0	0	0	0	0	0	0	0	0	0	0	0
Akkermansia	0	0	7.60809	0	10.8614	0	0	0	0	0	0	0	0.575085	0.45169	0	0	0	0.338419	0
Alicyclobacillus	0	0	0	0.527041	0	0	0	0	0	0	0	0	0	0	0	0	0	0	0
Alistipes	0	0	1.21754	0	12.0573	0	0	0	0	0	0	0	0	0	0	0	0	10.6822	0
Alphaproteobacteria_norank	0	0	0	0	0	0	0	0	0	0	0	0	0	0.0834873	0	0	0	0	0
Aminipila	0	0	0	0	0	0.11468	0	0	0	0	0	0	0	0	0	0	0	0	0
Anaerobium	0	0	0	0	0	0.0268639	0	0	0	0	0	0	0	0	0	0	0	0.58257	0
Anaerobutyricum	0	0	0	0	0	0	0.0576659	0	0	0	0	0	0	0	0	0	0	0	0
Anaerofustis	0.0507833	0	0	0	0	0	0	0	0	0	0	0	0	0	0	0	0	0	0
Anaeromassilibacillus	0	0	0	0	0	1.93092	0.0273043	0	0	0	0	0	0	0	0	0	0	0	0
Anaeroplasma	0	0	0	0	0	0.467775	0	0	0	0	0	0	0	0	0	0	0	0	0
Anaerosacchariphilus	0	0	0	0	0	0	0	0	0	0	0	0	0	0	0	0	0	0.0299286	0
Anaerostipes	0	0	0	0	0	0	0.370464	0	0	0	0	0	0	0	0	0	0	0	0
Anaerotignum	0.394524	0	0	0	0	0	0	1.40181	0	0	0	0	0	0	0	0	0	0.0642226	0
Anaerotruncus	0	0	0	0	0	4.59577	0.769957	2.37129	0	0	0	0	0	0	0	0	0	0	0
Anaerovibrio	0	0	0.586931	0	0	0.606346	0.460096	0	0	0	0	0	0	0.616022	0.625581	0.516204	0.944975	0.42181	0.636835
Anaerovorax	0.201731	0	0	0	0	0	0	0	0	0	0	0	0	0	0	0	0	0	0
Angelakisella	0	0	0	0	0	0	0	0.117172	0	0	0	0	0	0	0	0	0	0	0
Asinibacterium	0	0	0.0581462	0	0	0	0	0	0	0	0	0	0	0.0586499	0	0	0.399096	0.0468881	0
Azospirillum	0	0	0	0	0	0	0	0	0	0	0	0	0	0.0681773	0	0	0	0	0
Bacillus	0.0239524	0	0	0.0122216	0.0248457	0	0.485986	0.0809621	0	0	0	0	0	0.104111	0.0365234	0	0	0.00745094	0
Bacteria_norank	0	0	0.0821138	0	0	1.30348	2.4228	0.130224	0.183274	0	0.0887107	0	0	0.323338	0	0	0	22.2674	0
Bacteroidaceae_norank	0	0	0.549641	0	0	0	0	0	0	0	0	0	0	0	0	0	0	0	0
Bacteroidales_norank	0	0	3.7679	0	14.4067	0	0	0	0	0	0	0	0	0.13446	0	0	0	2.78067	0
Bacteroides	0	0	7.45454	0	16.0333	1.14217	0	0	0	0	0	0	0	0.0580688	0.0565512	0	0	19.1211	0
Bacteroidetes_norank	0	0	6.94833	0	0	0	0	2.4525	0	0	0	0	0	0	0.194333	0	0	2.56201	0
Bacteroidia_norank	0	0	7.46432	0	0	0	0	0	0	0	0	0	0	0	0	0	0	1.05471	0.202397
Bariatricus	0	0	0	0	0	0.0456676	0.0346236	0	0	0	0	0	0	0	0	0	0	0	0
Barnesiella	0	0	0	0	0.694601	0	0	0	0	0	0	0	0	0	0	0	0	1.22425	0
Bermanella	0	0	0	0	0	0	0	0	0	0	0	0	0	0	0.194934	0	0	0	0
Bilophila	0	0	0	0	0	0	0	0	0	0	0	0	0	0.128547	0	0	0	0	0
Bittarella	0	0	0	0	0	0	0.161169	0	0	0	0	0	0	0	0	0	0	0	0
Blautia	0	0	0	0	0	4.42507	3.02875	0	0	0	0	0	0	0	0	0	0	0	0
Bordetella	0	0	0	0	0	0.0383578	0	0	0	0	0	0	0	0	0	0	0	0	0
Bradyrhizobiaceae_norank	0	0	0	0	0	0	0	0.0629652	0	0	0	0	0	0	0	0	0	0	0
Bradyrhizobium	0	0	0.13916	0	0.166063	0	0	0.150426	0	0	0	0	0	0.149377	0.153171	0	0	0.177803	0
Butyricicoccus	0	0	0	0	0	0.184503	0.0791466	0	0	0	0	0	0	0	0	0	0	0	0
Butyrivibrio	0	0	0	0	0	2.1862	2.15458	0	0	0	0	0	0	0	0	0	0	0.120613	0
Caldisalinibacter	0	0	0	0	0	0	0.020437	0	0	0	0	0	0	0	0	0	0	0	0
Caloramator	0	0	0	0	0	0.0427058	0	0	0	0	0	0	0	0	0	0	0	0	0
Campylobacter	0	0	0	0.0832309	0	0	0	0.0706173	0	0	0	0	0	0	0	0	0	0	0
Candidatus Frackibacter	0	0	0	0	0	0	0.0708213	0	0	0	0	0	0	0	0	0	0	0	0
Candidatus Melainabacteria_norank	0	0	0	0	0	0	0.351595	0	0	0	0	0	0	0	0	0	0	0	0
Candidatus Schekmanbacteria_norank	0	0	0	0	0	0.125926	0	0	0	0	0	0	0	0	0	0	0	0	0
Candidatus Soleaferrea	0	0	0	0	0	0.102479	0	0	0	0	0	0	0	0	0	0	0	0	0
Candidatus Wirthbacteria_norank	0	0	0	0	0	0.0331787	0	0	0	0	0	0	0	0	0	0	0	0	0
Caprobacter	0	0	0	0	0	0.0370139	0.311692	0	0	0	0	0	0	0	0	0	0	0	0
Caproiciproducens	0	0	0	0	0	1.65825	5.19173	0	0	0	0	0	0	0	0	0	0	0	0
Catabacter	0	0	0	0	0	0	0	0.48978	0	0	0	0	0	0	0	0	0	0	0
Cetobacterium	0	0	0	0	0	0.182914	0	0	0	0	0	0	0	0	0	0	0	0	0
Chloroflexi_norank	0	0	0	0	0	0.102154	0.0404789	0	0	0	0	0	0	0	0	0	0	0.381265	0
Christensenella	0	0	0	0	0	0	0	0.765755	0	0	0	0	0	0	0	0	0	0	0
Clostridia_norank	1.46568	0	0	0	0	10.8049	15.6093	0.409369	0	0	0	0	0	0	0	0	0	0.108766	0
Clostridiaceae_norank	0	0	0	0	0	0.734189	0.550129	0	0	0	0	0	0	0	0	0	0	0	0
Clostridiales Family XIII. Incertae Sedis_norank	0.336165	0	0	0	0	6.37853	11.2499	0.280266	0	0	0	0	0	0	0	0	0	0	0
Clostridiales_norank	0.667776	0	0	0	0	10.058	6.88815	4.44951	0	0	0	0	0	0.186139	0.0151889	0	0.0121141	0.0933613	0
Clostridium	0.166608	0	0	0	0.396891	15.6161	8.97042	1.98982	0	0	0	0	0	0	0	0	0	0.0825556	0
Colidextribacter	0	0	0	0	0	0	0.040901	0	0	0	0	0	0	0	0	0	0	0	0
Coprobacillus	0	0	0	0	0	0.242153	0.979198	0	0	0	0	0	0	0	0	0	0	0	0
Coprobacter	0	0	0	0	0	0	0	0	0	0	0	0	0	0	0	0	0	1.97399	0
Coprococcus	0	0	0	0	0	0.848872	1.37755	0	0	0	0	0	0	0	0	0	0	1.62578	0
Coriobacteriaceae_norank	0	0	0	0	0	0	0	0.0421886	0	0	0	0	0	0	0	0	0	0	0
Coriobacteriia_norank	0	0	0	0	0	0	0	0.0257265	0	0	0	0	0	0	0	0	0	0	0
Culturomica	0	0	0.0974771	0	0	0	0	0	0	0	0	0	0	0	0	0	0	0.111673	0
Cyanobacteria_norank	0	0	0	0	0	0	0.178781	0	0	0	0	0	0	0	0	0	0	0	0
Deferribacter	0	0	0	0	0	0	0	0	0	0	0	0	0	0	0	0	0.0179954	0	0
Dehalobacterium	0	0	0	0	0	0	0.108367	0	0	0	0	0	0	0	0	0	0	0	0
Deltaproteobacteria_norank	0	0	0	0	0	0	0.0964373	0	0	0	0	0	0	0.143488	0	0	0	0.0904603	0
Desulfacinum	0	0	0	0	0	0	0	0	0	0	0	0	0	0	0.358249	0	0	0	0
Desulfococcus	0	0	0	0	0	0	0	0	0	0	0	0	0	0	0	0	0	0.128261	0
Desulfomicrobium	0	0	0	0	0	0.121724	0.0995024	0	0	0	0	0	0	0	0	0	0	0	0
Desulfonispora	0	0	0	0	0	0.294894	0	0	0	0	0	0	0	0	0	0	0	0	0
Desulfosporosinus	0	0	0	0	0	0.0612673	0	0	0	0	0	0	0	0.107399	0	0	0	0	0
Desulfotomaculum	0	0	0	0	0	0.0946776	0.155028	0	0	0	0	0	0	0	0	0	0	0	0
Desulfovibrio	0.276114	0	0	0	0	0.0762829	0.0501263	0	0	0	0	0	0	0.099614	0	0	0	0	0
Desulfuribacillus	0	0	0	0	0	0	0.112782	0	0	0	0	0	0	0	0	0	0	0	0
Dethiosulfatibacter	0.849766	0	0	0	0	0	0	0	0	0	0	0	0	0	0	0	0	0	0
Dorea	0	0	0	0	0	3.3162	0.189266	0	0	0	0	0	0	0	0	0	0	0	0
Drancourtella	0	0	0	0	0	0.0354287	0	0	0	0	0	0	0	0	0	0	0	0	0
Echinicola	0	0	0	0	0	0	0	0.135109	0	0	0	0	0	0	0	0	0	0	0
Effusibacillus	0	0	0	0	0	0	0.0422761	0	0	0	0	0	0	0	0	0	0	0	0
Eggerthella	0.103757	0	0	0	0	0	0.0274575	0	0	0	0	0	0	0	0	0	0	0	0
Eggerthellaceae_norank	0	0	0	0	0	0.12529	0	0	0	0	0	0	0	0	0	0	0	0.0105574	0
Eisenbergiella	0	0	0	0	0	0.520195	0.403104	0	0	0	0	0	0	0	0	0	0	0	0
Emergencia	0.035376	0	0	0	0	1.91021	0.780559	0.0485729	0	0	0	0	0	0	0	0	0	0	0
Erysipelatoclostridium	0	0	0	0	0	0	0.267589	0.17818	0	0	0	0	0	0	0	0	0	0	0
Erysipelotrichaceae_norank	0	0	0	0	0	0.0617986	0.0678866	0	0	0	0	0	0	0	0	0	0	0	0
Erysipelotrichia_norank	0	0	0	0	0	0.120913	0	0	0	0	0	0	0	0	0	0	0	0	0
Escherichia	0	0	0	0	0	0	0	0.115864	0	0	0	0	0	0	0	0	0	0	0.151141
Eubacteriaceae_norank	0.229466	0	0	0	0	0	0	2.19417	0	0	0	0	0	0	0	0	0	0	0
Eubacterium	1.3069	0	0	0	0	6.17034	9.08876	1.74585	0	0	0	0	0	0	0	0	0	0	0
Exiguobacterium	0	0	0	0.088106	0	0	0	0	0	0	0	0	0	0	0	0	0	0	0
Faecalibacterium	0	0	0	0	0	1.91793	1.11235	1.11497	0	0	0	0	0	0	0	0	0	0	0
Faecalicatena	0	0	0	0	0	0	0.215393	0	0	0	0	0	0	0	0	0	0	0.225096	0
Falsibacillus	0	0	0	0.803156	0	0	0	0	0	0	0	0	0	0	0	0	0	0	0
Fervidobacterium	0	0	0	0	0	0	0	0	0	0	0	0	0	0	0	0	0	0.0110199	0
Fibrobacter	0	0	1.53025	0	1.64938	0	0	0	0	0	0	0	0	0	0	0	0	0	0
Firmicutes_norank	3.26762	0	0	0	0	3.29611	3.50349	2.55282	0	0	0	0	0	0.164867	0.392089	0	0	0.576716	0
Flavobacteriales_norank	0	0	0.0831595	0	0.121166	0	0	0.0524889	0	0	0	0	0	0	0	0	0	0.135166	0
Flavonifractor	0.648032	0	0	0	0	1.69677	4.77155	0.082927	0	0	0	0	0	0	0	0	0	0.595863	0
Flexilinea	0	0	0	0	0	0	0	0	0	0	0	0	0	0.231788	0	0	0	0	0
Fournierella	0	0	0	0	0	0.127984	0.0667351	0	0	0	0	0	0	0	0	0	0	0	0
Fusobacterium	0	0	0	0	0	2.09599	0	0.150908	0	0	0	0	0	0	0	0	0	0	0
Gemmiger	0	0	0	0	0	0.0862491	0.117141	0	0	0	0	0	0	0	0	0	0	0	0
Geobacillus	0	0	0	0	0	0	0	0	0	0	0	0	0	0.154882	0	0	0	0	0
Gracilibacter	0	0	0	0	0	0	0	0	0	0	0	0	0	0.410256	0	0	0	0	0
Gudongella	0	0	0	0	0	0	0.0345477	0	0	0	0	0	0	0	0	0	0	0	0
Hadesarchaea_norank	0	0	0	0	0	0	0.0968118	0	0	0	0	0	0	0	0	0	0	0	0
Haloplasma	0	0	0	0	0	0.141886	0.0123442	0	0	0	0	0	0	0	0	0	0	0	0
Helicobacter	0	0	0	0.0881877	0	0	0	0.0862975	0	0	0	0	0	0	0	0	0	0	0
Heliorestis	0	0	0	0	0	0	0.0345218	0	0	0	0	0	0	0	0	0	0	0	0
Hungateiclostridium	0	0	0	0	0	0.0817199	0.0607507	0	0	0	0	0	0	0	0	0	0	0	0
Hungatella	0	0	0	0	0	0	0.428299	0	0	0	0	0	0	0	0	0	0	0.012303	0
Hydrobacter	0	0	0.47682	0	0	0	0	0.496114	0	0	0	0	0	0	0	0.495362	0	0.473168	0
Hydrogenoanaerobacterium	0	0	0	0	0	0.059271	0.0321201	0	0	0	0	0	0	0	0	0	0	0	0
Ignavibacteriae_norank	0	0	0	0	0	0	0	0.0880323	0	0	0	0	0	0	0	0	0	0	0
Intestinibacillus	0	0	0	0	0	0.0877342	0	0	0	0	0	0	0	0	0	0	0	0	0
Intestinimonas	0	0	0	0	0	0	0	0	0	0	0	0	0	0	0	0	0	0.197379	0
Kandleria	0	0	0	0	0	0.355025	0	0	0	0	0	0	0	0	0	0	0	0	0
Lachnoclostridium	0	0	0	0	0	5.73586	1.85639	2.11217	0	0	0	0	0	0.187537	0	0	0	0.0741896	0
Lachnospira	0	0	0	0	0	0.186653	0.368078	0.305768	0	0	0	0	0	0	0	0	0	0	0
Lachnospiraceae_norank	1.04985	0	0	0	0	25.6947	12.5341	0.997937	0	0	0	0	0	0.248442	0	0	0	0.726512	0
Lachnotalea	0	0	0	0	0	0.0986969	0	0	0	0	0	0	0	0	0	0	0	0	0
Lactobacillus	0	0	0	0	0	0	0.265193	0	0	0	0	0	0	0	0	0	0	0	0
Lactonifactor	0.0646479	0	0	0	0	0	0.675851	0	0	0	0	0	0	0	0	0	0	0	0
Lentisphaerae_norank	0	0	0	0	0	0.0442021	0.0259763	0	0	0	0	0	0	0	0	0	0	0	0
Lysinibacillus	0	0	0	0	0	0	0	0	0	0	0	0	0	0	0	0	0	0.008121	0
Mailhella	0.0377902	0	0	0	0	0.203181	0.21814	0	0	0	0	0	0	0	0	0	0	0	0
Marinisporobacter	0	0	0	0	0	0	0	0	0	0	0	0	0	0	0	0	0	0.656893	0
Marvinbryantia	0	0	0	0	0	0.785381	3.30173	0	0	0	0	0	0	0	0	0	0	0	0
Massilimaliae	0	0	0	0	0	0.194935	0	0	0	0	0	0	0	0	0	0	0	0	0
Massilioclostridium	0	0	0	0	0	0.561388	0.589394	0	0	0	0	0	0	0	0	0	0	0	0
Mediterraneibacter	0	0	0	0	0	0.313286	0	0	0	0	0	0	0	0	0	0	0	0	0
Merdimonas	0	0	0	0	0	0.116438	0.0922478	0	0	0	0	0	0	0	0	0	0	0	0
Mesorhizobium	0	0	0.0672081	0	0.0956386	0	0	0	0	0	0	0	0	0.0735106	0	0	0	0.0238504	0
Methanobacteriales_norank	0	0.0368582	0	0	0	0.0379654	0	0	0	0	0	0	0	0	0	0	0	0	0
Methanobrevibacter	0	10.9749	0	0	0	10.0027	6.46792	0	0	0	0	0	0	8.87663	0	0	0	0	0
Methanocorpusculum	0	0	0	0	0	0.228024	0	0	0	0	0	0	0	0.132428	0	0	0	0	0
Methanomassiliicoccales_norank	0	0	0	0	0	0	0.0378089	0	0	0	0	0	0	0	0	0	0	0	0
Methylovirgula	0	0	0	0	0	0	0	0	0	0	0	0	0	0.0491327	0.05574	0	0	0	0
Mitsuokella	0	0	0	0	0	0	0	0.11571	0	0	0	0	0	0	0.213699	0	0.0895617	0.199397	0
Mobilibacterium	0.134656	0	0	0	0	0	0	0	0	0	0	0	0	0	0	0	0	0	0
Mordavella	0	0	0	0	0	0.459386	1.27494	0	0	0	0	0	0	0	0	0	0	0	0
Mucispirillum	0	0	0	0	0	0	0	0	0	0	0	0	0	0	0	0	0	0.0260891	0
Muribaculaceae_norank	0	0	5.58591	0	2.61057	0	0	0	0	0	0	0	0	0	0	0	0	1.15225	0
Muribaculum	0	0	0	0	10.076	0	0	0	0	0	0	0	0	0	0	0	0	1.81723	0
Mycobacterium	0	0	0	0	0	0	0	0	0	0	0	0	0	0	0	0	0	0	0.199871
Mycolicibacterium	0	0	0	0	0	0	0	0	0	0	0	0	0	0.0518968	0	0	0	0.0309327	0
Nautilia	0	0	0	0	0	0	0.0568469	0	0	0	0	0	0	0	0	0	0	0	0
Neglecta	0	0	0	0	0	0.459417	0	0	0	0	0	0	0	0	0	0	0	0	0
Nitrospinae_norank	0	0	0	0	0	0	0.0138309	0	0	0	0	0	0	0	0	0	0	0	0
Nitrospiraceae_norank	0	0	0	0	0	0	0	0	0	0	0	0	0	0	0	0	0	0.0568069	0
Odoribacter	0	0	1.02988	0	0	0	0	0	0	0	0	0	0	0	0	0	0	0	0
Olsenella	0	0	0	0	0	0	0	0.0593117	0	0	0	0	0	0	0	0	0	0	0
Ornithinibacillus	0	0	0	0.226553	0	0	0	0	0	0	0	0	0	0	0	0	0	0	0
Oscillibacter	1.13341	0	0	0	0	0.157321	0.147455	1.88922	0	0	0	0	0	0	0	0	0	0	0
Oxalobacter	0	0	0	0	0.162593	0	0	0	0	0	0	0	0	0.223816	0.195658	0	0	0	0
Paenibacillus	0	0	0	0.162086	0	0	0	0	0	0	0	0	0	0	0	0	0	0	0
Paeniclostridium	0	0	0	0	0	0	0	0	0	0	0	0	0	0	0	0.153564	0.0939103	0.0149552	0
Papillibacter	0.560098	0	0	0	0	0	0.0298708	0	0	0	0	0	0	0	0	0	0	0	0
Parabacteroides	0	0	6.91633	0	0.942195	0	0	0	0	0	0	0	0	0	0	0	0	1.96685	0
Paraclostridium	0	0	0	0	0	0	0	0	0	0	0	0	0	0	0	0	0	0.0919139	0
Paraeggerthella	0	0	0	0	0	0.0263187	0	0	0	0	0	0	0	0	0	0	0	0	0
Parageobacillus	0	0	0	0	0	0	0	0	0	0	0	0	0	0.0908724	0	0	0	0	0
Paraprevotella	0	0	0	0	3.58967	0	0	0	0	0	0	0	0	0	0	0	0	0.00579069	0
Peptococcaceae_norank	0.156446	0	0	0	0	0.493334	0.0477526	0	0	0	0	0	0	0	0	0	0	0	0
Peptostreptococcaceae_norank	0	0	0	0	0	0.031568	0.0280834	0	0	0	0	0	0	0	0	0	0	0	0
Petroclostridium	0	0	0	0	0	0.0209341	0.293289	0	0	0	0	0	0	0	0	0	0	0	0
Phascolarctobacterium	0.381037	0	0	0	0	3.07132	2.84175	0	0	0	0	0	0	0	0	3.1289	2.22707	2.83506	0
Phocea	0	0	0	0	0	0.0126532	0	0	0	0	0	0	0	0	0	0	0	0	0
Planctomycetes_norank	0	0	0	0	0	0	0	1.03012	0	0	0	0	0	0	0	0	0	0	0
Planococcus	0	0	0	0	0	0	0	0	0	0	0	0	0	0	0	0	0	0.0303004	0
Porphyromonadaceae_norank	0	0	1.54728	0	5.34646	0	0	0	0	0	0	0	0	0	0	0	0	0.851174	0
Pradoshia	0	0	0	0.0168202	0	0	0	0	0	0	0	0	0	0	0	0	0	0	0
Prevotella	0	0	1.03007	0	63.7625	0	0	0	0	0	0	0	0	0	0	0	0	41.1696	2.45134
Prevotellaceae_norank	0	0	0	0	0.816125	0	0	0	0	0	0	0	0	0	0	0	0	2.30592	0
Propionispira	0	0	0	0	0	0	0.562982	0	0	0	0	0	0	0	0	0	0	0	0
Proteobacteria_norank	0	0	0	0	0	0	0	0	0	0	0	0	0	0.0967092	0	0	0	0	0
Proteocatella	0	0	0	0	0	0.329546	0	0	0	0	0	0	0	0	0	0	0	0	0
Pseudobutyrivibrio	0	0	0	0	0	1.09642	0.959259	0.582944	0	0	0	0	0	0	0	0	0	0	0
Pseudoclostridium	0	0	0	0	0	0	0.103216	0.148252	0	0	0	0	0	0	0	0	0	0	0
Pseudoflavonifractor	0.736401	0	0	0	0	0.368755	1.29574	0	0	0	0	0	0	0	0	0	0	0	0
Pueribacillus	0	0	0	0.283676	0	0	0	0	0	0	0	0	0	0	0	0	0	0	0
Puniceicoccaceae_norank	0	0	0	0	0	0	0	0	0	0	0	0	0	0	0.066462	0	0	0	0
Raoultibacter	0	0	0	0	0	0.065633	0	0	0	0	0	0	0	0	0	0	0	0	0
Rhodanobacter	0	0	0.0844189	0	0.0909999	0	0	0	0	0	0	0	0	0.0746855	0.0898878	0	0	0	0
Rhodopirellula	0	0	0.791709	0	0	0	0	0	0	0	0	0	0	0	0	0	0	0	0
Rikenellaceae_norank	0	0	0.145928	0	24.2353	0	0	0	0	0	0	0	0	0	0	0	0	0	0
Robinsoniella	0	0	0	0	0	0	0.0909061	0	0	0	0	0	0	0.0559212	0	0	0	0	0
Romboutsia	0.210134	0	0	0	0	0	0	0	0	0	0	0	0	0	0	0	0	0	0
Roseburia	0	0	0	0	0	2.82687	2.30588	0	0	0	0	0	0	0	0	0	0	0	0
Ruminiclostridium	0	0	0	0	0	0	0.0137776	0	0	0	0	0	0	0	0	0	0	0	0
Ruminobacter	0	0	0	0	0.487392	0	0	0	0.579107	0.691316	0.741204	0.439556	0	0.473918	0.640755	0	0	0	0
Ruminococcaceae_norank	0	0	0	0	0	12.7461	10.9041	0.928046	0	0	0	0	0	0	0	0	0	0	0
Ruminococcus	0	0	0	0	0	5.9653	4.00389	17.708	0	0	0	0	0	0	0	0	0	0	0
Ruthenibacterium	0	0	0	0	0	0.218059	0	0	0	0	0	0	0	0	0	0	0	0	0
Salinibacillus	0	0	0	0	0	0	0.0706675	0	0	0	0	0	0	0	0	0	0	0	0
Salinicoccus	0	0	0	0.119617	0	0	0	0	0	0	0	0	0	0	0	0	0	0	0
Salinivirga	0	0	0	0	0	0	0	0	0	0	0	0	0	0	0.0417508	0	0	0	0
Sanguibacteroides	0	0	2.01849	0	0	0	0	0	0	0	0	0	0	0	0	0	0	0	0
Sarcina	0.684915	0	0	0	0	0	0	1.961	0	0	0	0	0	0	0	0	0	0.0299313	0
Schaedlerella	0	0	0	0	0	0.124547	0.0277761	0	0	0	0	0	0	0	0	0	0	0	0
Schwartzia	0	0	0	0	0	1.6975	1.36798	0	0	0	0	0	0	1.61184	1.64732	1.93391	0	1.47049	0
Sedimentibacter	0.0620253	0	0	0	0	0	0.0389924	0	0	0	0	0	0	0	0	0	0	0	0
Selenomonadales_norank	0	0	0	0	0	0.0710963	0	0	0	0	0	0	0	0	0	0	0	0	0
Selenomonas	0	0	0.567552	0	0	0.788503	0.193484	0	0	0	0	0	0	0.688658	0.507303	0.279472	0.682516	0.482991	2.17917
Shigella	0	0	0	0.130853	0.293364	0	0	0	0	0.168491	0	0.150966	0	0.155558	0.145015	0	0	0	0
Smithella	0	0	0	0	0	0	0	0	0	0	0	0	0	0	0	0	0	0.64484	0
Soehngenia	0	0	0	0	0	0	0	0	0	0	0	0	0	0	0	0	0	0.0506054	0
Sphaerochaeta	0	0	0	0	0	0	0	0	0	0	0	0	0	0.25616	0.0399824	0	0	0	0
Sphingobacteriia_norank	0	0	0.460289	0	0.102556	0	0	0	0	0	0	0	0	0	0	0	0.0626517	0	0
Spirochaetaceae_norank	0	0	0	0	0	0	0	0	0	0	0	0	0	0	0	0	0.0626071	0	0
Spirochaetia_norank	0	0	0	0	0	0.17562	0	0	0	0	0	0	0	0	0	0	0	0	0
Sporobacter	0	0	0	0	0	0.568087	0.202972	0	0	0	0	0	0	0	0	0	0	0	0
Sporolactobacillaceae_norank	0	0	0	0	0	0	0	0	0	0	0	0	0	0.0272324	0	0	0	0	0
Subdoligranulum	0	0	0	0	0	0.591405	0	0	0	0	0	0	0	0	0	0	0	0	0
Succinatimonas	0	0	0	0	0.353009	0	0	0	0	0	0	0	0	0.318334	0.501329	0	0	0	0
Succiniclasticum	3.07909	0	0	0	0	2.75102	2.66126	0	0	0	0	0	0	3.33728	2.93238	2.99652	2.66146	3.14446	0
Succinimonas	0	0	0	0	0	0	0	0	0.245421	0	0	0	0	0	0	0	0	0	0
Succinivibrio	0	0	0	0	0.214415	0	0	0	0.553532	0.680785	0.65198	0.443395	0	0	0	0	0	0	0
Succinivibrionaceae_norank	0	0	0	0	0	0	0	0	0	0	0	0.167404	0	0	0	0	0	0	0
Synergistales_norank	0	0	0	0	0	0	0	0.202075	0	0	0	0	0	0	0	0	0	0	0
Syntrophorhabdus	0	0	0	0	0	0	0	0	0	0	0	0	0	0	0	0	0	0.176854	0
Tenericutes_norank	0	0	0	0	0	0.580969	0	0	0	0	0	0	0	0	0	0	0	0	0
Tepidanaerobacter	0	0	0	0	0	0.356446	0.56247	0	0	0	0	0	0	0	0	0	0	0	0
Thalassotalea	0	0	0	0	0	0	0	0	0	0	0	0	0	0.175943	0	0	0	0	0
Thermoanaerobacter	0	0	0	0	0	0	0	0	0	0	0	0	0	0	0	0	0	0.0189125	0
Thermoanaerosceptrum	0	0	0	0	0	0.114087	0	0	0	0	0	0	0	0	0	0	0	0.0113435	0
Thermobrachium	0	0	0	0	0	0.0222645	0.0401164	0	0	0	0	0	0	0	0	0	0	0	0
Thermodesulfitimonas	0	0	0	0	0	0.0518892	0	0	0	0	0	0	0	0	0	0	0	0	0
Thermohalobacter	0	0	0	0	0	0.0715465	0	0	0	0	0	0	0	0	0	0	0	0	0
Thermolongibacillus	0	0	0	0.0202131	0	0	0	0	0	0	0	0	0	0	0	0	0	0	0
Thermosediminibacter	0	0	0	0	0	0.214244	0.0376517	0	0	0	0	0	0	0	0	0	0	0	0
Thermosulfidibacter	0	0	0	0	0	0	0	0	0	0	0	0	0	0	0.0647957	0	0	0	0
Treponema	0	0	0	0	0.493405	0	0	11.3394	0	0	0	0	0	0	0	0	0	0	0
Turicibacter	0	0	0	0	0	0	0.0328009	0	0	0	0	0	0	0	0	0	0	0	0
Tyzzerella	1.66811	0	0	0	0	0.34098	0.38407	0	0	0	0	0	0	0	0	0	0	0	0
Ulvibacter	0	0	0	0	0	0	0	0	0	0	0	0	0	0	0	0	0	0.601159	0
Veillonellaceae_norank	0	0	0	0	0	0	0	0	0	0	0	0	0	0	0	0	0.312773	0	0
Verrucomicrobia_norank	0	0	0	0	0.0211626	0	0	0	0	0	0	0	0	0	0	0	0	0.0426858	0
Vibrio	0	0	0	0	0	0	0	0	0	0	0	0.0263141	0	0	0	0	0	0	0
Vibrionimonas	0	0	0	0	0	0	0	0	0	0	0	0	0	0.488072	0.376262	0	0	0	0
Vulcanibacillus	0	0	0	0	0	0	0	0	0	0	0	0	0	0.0543887	0	0	0	0	0
candidate division WOR-3_norank	0	0	0	0	0	0	0.0260184	0	0	0	0	0	0	0	0	0	0	0	0
Acetatifactor	0	0	0	0	0	0	0.0315717	0	0	0	0	0	0	0	0	0	0	0	0
Acidaminobacter	0	0	0	0	0	0.0103652	0	0	0	0	0	0	0	0	0	0	0	0	0
Aestuariibacter	0	0	0	0	0	0	0	0	0	0	0	0	0	0.0158851	0	0	0	0	0
Alloprevotella	0	0	0	0	0.246565	0	0	0	0	0	0	0	0	0	0	0	0	0	0
Ancylomarina	0	0	0.0806411	0	0	0	0	0	0	0	0	0	0	0	0	0	0	0	0
Anoxybacillus	0	0	0	0	0	0	0	0	0	0	0	0	0	0.015747	0	0	0	0	0
Armatimonadetes_norank	0	0	0	0	0	0.0409159	0	0	0	0	0	0	0	0	0	0	0	0	0
Bacilliculturomica	0.060207	0	0	0	0	0	0	0	0	0	0	0	0	0	0	0	0	0	0
Bdellovibrionales_norank	0	0	0	0	0	0	0.0140073	0	0	0	0	0	0	0	0	0	0	0	0
Brevibacillus	0	0	0	0	0	0	0.0273942	0	0	0	0	0	0	0	0	0	0	0	0
Butyricimonas	0	0	0.106091	0	0	0	0	0	0	0	0	0	0	0	0	0	0	0	0
Chlamydia	0	0	0	0	0	0	0	0	0	0	0	0	0	0.0214608	0	0	0	0	0
Desulfobulbus	0	0	0	0	0	0	0	0	0	0	0	0	0	0	0	0	0	0.0234327	0
Desulfuromonas	0	0	0	0	0	0	0	0	0	0	0	0	0	0	0.0165489	0	0	0	0
Dysgonomonas	0	0	0.543301	0	0	0	0	0	0	0	0	0	0	0	0	0	0	0	0
Endomicrobium	0	0	0	0	0	0.0774751	0.0907587	0	0	0	0	0	0	0	0	0	0	0	0
Fervidicella	0	0	0	0	0	0	0.0376607	0	0	0	0	0	0	0	0	0	0	0	0
Fusobacteria_norank	0	0	0	0	0	0.0711574	0	0	0	0	0	0	0	0	0	0	0	0	0
Geobacter	0	0	0	0	0	0	0	0	0	0	0	0	0	0.0152757	0	0	0	0	0
Holdemania	0	0	0	0	0	0	0	0	0	0	0	0	0	0	0	0	0	0.0373006	0
Hydrotalea	0	0	0.350287	0	0	0	0	0	0	0	0	0	0	0	0	0	0	0	0
Lawsonibacter	0	0	0	0	0	0	0.229277	0	0	0	0	0	0	0	0	0	0	0	0
Lentisphaeria_norank	0	0	0	0	0	0	0	0.078746	0	0	0	0	0	0	0	0	0	0	0
Mannheimia	0	0	0	0	0	0	0	0.395043	0	0	0	0	0	0	0	0	0	0	0
Marinilabiliales_norank	0	0	0	0	0	0	0	0	0	0	0	0	0	0	0	0	0	0.0936303	0
Marispirochaeta	0	0	0	0	0	0.0247108	0	0	0	0	0	0	0	0	0	0	0	0	0
Mediterranea	0	0	0	0	0	0	0	0	0	0	0	0	0	0	0	0	0	0.81894	0
Megamonas	0	0	0	0	0	0	0	0	0	0	0	0	0	0	0	0	0.0776559	0	0
Murimonas	0	0	0	0	0	0.189729	0	0	0	0	0	0	0	0	0	0	0	0	0
Oribacterium	0	0	0	0	0	0	0	0.0487901	0	0	0	0	0	0	0	0	0	0	0
Pantoea	0	0	0	0	0.048941	0	0	0	0	0	0	0	0	0	0	0	0	0	0
Porphyromonas	0	0	0	0	0	0	0	0	0	0	0	0	0	0	0	0	0	1.94351	0
Pseudodesulfovibrio	0	0	0	0	0	0	0	0	0	0	0	0	0	0.017957	0	0	0	0	0
Rikenella	0	0	0	0	0	0	0	0	0	0	0	0	0	0	0	0	0	0.0064595	0
Stomatobaculum	0	0	0	0	0	0	0	0.0430841	0	0	0	0	0	0	0	0	0	0	0
Tannerella	0	0	0	0	0	0	0	0	0	0	0	0	0	0	0	0	0	1.34962	0
Tepidibacter	0	0	0	0	0	0	0	0	0	0	0	0	0	0	0	0	0	0.0157031	0
Thermogutta	0	0	0	0	0	0	0	0.207144	0	0	0	0	0	0	0	0	0	0	0
Thermonema	0	0	0	0	0	0	0	1.45716	0	0	0	0	0	0	0	0	0	0	0
Veillonella	0	0	0	0	0	0	0	0	0	0	0	0	0	0	0	0	0.0674449	0	0

## Sheet: WLPathway
Pathway name	Phylum	K15023	K14138	K00197	K00194	K00196	K00198	K15022	K01938	K01491	K00297	K05299	K01500
Wood-Ljungdahl pathway	Actinobacteria	0.131757	0	0	0	0.0479346	0	0	0.0636113	0.0509369	0.621636	0	0.466298
	Armatimonadetes	0	0	0	0	0	0	0	0	0.0391217	0	0	0
	Bacteria_norank	0	0.142223	0.292743	2.0169	0	0.514388	0	7.46515	23.1317	20.168	0	2.26032
	Bacteroidetes	0	0	0	0	0	0.197425	0	0.573726	132.796	112.525	0	6.94837
	Candidatus Atribacteria	0	0	0	0	0	0	0	0	0	0	0	0.100123
	Candidatus Melainabacteria	0	0	0	0	0	0	0	0	1.11498	0.4054	0	0
	Candidatus Omnitrophica	0	0	0	0.0959479	0	0	0	0	0	0.122972	0	0
	Candidatus Woesearchaeota	0	0	0	0	0	0	0	0	0.199587	0	0	0
	Chloroflexi	0	0	0	0	0	0	0	0	0.219893	0	0	0
	Deferribacteres	0	0	0	0	0	0	0	0	0	0.0320911	0	0
	Elusimicrobia	0	0	0.0985846	0	0.0758366	0	0	0	0	0	0	0
	Euryarchaeota	0	0	0.0481967	0.0615287	0	0	0	0.183835	0.12217	0	0	0
	Fibrobacteres	0	0	0	0	0	0	0	0	1.64856	1.70652	0	0
	Firmicutes	25.0825	48.7348	34.6204	35.9961	1.18552	45.3367	0	161.843	170.315	213.252	0.464385	80.8836
	Fusobacteria	0	0	0	0	0	0	0	0	0.07976	0.0249957	0	0
	Lentisphaerae	0	0	0	0	0	0	0	0	0.0580649	0	0	0
	Planctomycetes	0	0	0	0	0	0	0	0	1.16041	0	0	0
	Proteobacteria	0	0	0	0	0.139907	0.478756	0.17217	0.246462	3.52284	1.62741	0	0
	Spirochaetes	1.61688	0.777722	0.629247	1.08686	0	0	0	8.09616	9.57052	13.8143	0	0.24517
	Synergistetes	0	0	0	0	0	0	0	0	0.100649	0.0379077	0	0.29127
	Tenericutes	0	0	0	0	0	0	0	2.47955	2.38319	2.80165	0	0
	Verrucomicrobia	0	0	0	0	0	0	0	0	9.88772	10.6524	0	0

## Sheet: M
Pathway name	Phylum	K00200	K00201	K00202	K00203	K00204	K00205	K12160	K12161	K00672	K01499	K00319	K00320	K00577	K00578	K00579	K00580	K00581	K00582	K00583	K00584	K00399	K00400	K00401	K00402	K03421	K03422
Methanogenesis	Bacteroidetes	0.186285	0.210173	0.121822	0.164922	0	0	0	0	0	0	0	0	0	0	0.212833	0	0	0	0	0	0	0	0	0	0	0
	Chloroflexi	0	0	0	0	0	0	0	0	0.0480667	0	0	0	0	0	0	0	0	0	0	0	0	0	0	0	0	0
	Ciliophora	0	0	0	0	0	0	4.38406	0	0	0	0	0	0	0	0	0	0	0	0	0	0	0	0	0	0	0
	Euryarchaeota	12.2111	14.6568	11.4084	11.1336	10.1594	23.9534	0	0	20.4332	9.01323	10.6824	9.59937	22.5781	7.81463	10.7971	9.0989	9.44022	4.55222	6.44664	13.4593	8.56245	20.8496	11.2377	11.5673	10.1767	11.7806
	Evosea	0	0	0	0	0	0	0.0146154	0.888511	0	0	0	0	0	0	0	0	0	0	0	0	0	0	0	0	0	0
	Firmicutes	0	0	0	0	0	0	0	0	0	0.130459	0	0.281273	0	0	0	0	0	0	0	0	0	0	0	0	0	0
	Fungi	0	0	0	0	0	0	0.841198	0.206978	0	0	0	0	0	0	0	0	0	0	0	0	0	0	0	0	0	0
	Planctomycetes	0	0	0	0	0	0	0	0	0.0278338	0	0	0	0	0	0	0	0	0	0	0	0	0	0	0	0	0
	Proteobacteria	0.0631663	0	0	0	0	0	0	0	0	0.0560157	0	0	0	0	0	0	0	0	0	0	0	0	0	0	0	0
	Viridiplantae	0	0	0	0	0	0	1.69931	0	0	0	0	0	0	0	0	0	0	0	0	0	0	0	0	0	0	0

## Sheet: EMP
Pathway name	Phylum	K00844	K00845	K00886	K00918	K01810	K06859	K13810	K15916	K00850	K16370	K01624	K11645	K16305	K16306	K01622	K01803	K00134	K00150	K00927	K01834	K15633	K15634	K15635	K01689
Embden-meyerhof-parnas	Acidobacteria	0	0	0	0	0	0	0	0	0	0	0	0	0	0	0	0	0	0	0	0	0	0	0	0.059228
	Actinobacteria	0	0	0.298315	0	1.7356	0.136507	0	0	0	0	1.64285	0	0	0	0	0.670489	0.621125	0	1.94779	1.67048	0.444928	0	0.118587	2.46487
	Apicomplexa	0	0	0	0	0	0	0	0	0	0	0	0	0	0	0	3.13087	0	0	0	0	0	0	0	0
	Aquificae	0	0	0	0	0	0	0	0	0	0	0	0	0	0	0	0.0300693	0	0	0	0	0.0306694	0	0	0.0356016
	Archaea_norank	0	0	0	0	0	0	0	0	0	0	0	0	0	0	0	0.0244236	0	0	0	0	0	0	0	0
	Armatimonadetes	0	0	0	0	0.0458986	0	0	0	0	0	0.0990123	0	0	0	0	0.0426192	0	0	0.160224	0	0	0	0.0738806	0
	Bacteria_norank	0	0	0	0	37.4368	0.017225	0	0	8.22444	0	60.8004	0	0	0	0	23.6824	26.9948	0	24.5277	25.4436	19.2156	0	3.89948	19.7795
	Bacteroidetes	0	0	0	0	151.269	1.54456	0	0	130.318	0.54595	154.597	0.524952	0	0	0	149.433	142.947	0	187.055	15.868	170.112	0	65.7366	132.995
	Caldiserica	0	0	0	0	0	0	0	0	0	0	0.0310535	0	0	0	0	0.02784	0	0	0.0722626	0	0	0	0	0
	Calditrichaeota	0	0	0	0	0	0	0	0	0	0	0	0	0	0	0	0	0	0	0	0	0	0	0	0.0690363
	candidate division Zixibacteria	0	0	0	0	0	0	0	0	0	0	0	0	0	0	0	0	0	0	0	0	0.00770969	0	0.024284	0.00801044
	Candidatus Aerophobetes	0	0	0	0	0	0	0	0	0	0	0.136876	0	0	0	0	0	0	0	0	0	0	0	0	0
	Candidatus Beckwithbacteria	0	0	0	0	0	0	0	0	0	0	0	0	0	0	0	0	0	0	0	0	0	0	0	0.0508516
	Candidatus Buchananbacteria	0	0	0	0	0	0	0	0	0	0	0	0	0	0	0	0.0693304	0	0	0	0	0	0	0	0
	Candidatus Cloacimonetes	0	0	0	0	0	0	0	0	0	0	0	0	0	0	0	0.0327612	2.80378	0	0	0	0	0	0	0
	Candidatus Cryosericota	0	0	0	0	0	0.0202361	0	0	0	0	0	0	0	0	0	0	0	0	0	0	0	0	0	0
	Candidatus Dadabacteria	0	0	0	0	0	0	0	0	0	0	0	0	0	0	0	0.0552234	0	0	0	0	0	0	0	0
	Candidatus Diapherotrites	0	0	0	0	0	0	0	0	0	0	0	0	0	0	0	0	0	0	0	0	0	0	0.0772353	0
	Candidatus Falkowbacteria	0	0	0	0	0	0	0	0	0	0	0	0	0	0	0	0	0	0	0	0	0	0	0	0.0175731
	Candidatus Glassbacteria	0	0	0	0	0	0	0	0	0	0	0	0	0	0	0	0	0	0	0	0	0	0	0	0.0148944
	Candidatus Gracilibacteria	0	0	0	0	0	0	0	0	0	0	0	0	0	0	0	0	0	0	0	0	0	0	0	0.0627541
	Candidatus Kaiserbacteria	0	0	0	0	0	0	0	0	0	0	0	0	0	0	0	0	0	0	0	0	0	0	0	0.0826353
	Candidatus Komeilibacteria	0	0	0	0	0	0	0	0	0	0	0	0	0	0	0	0	0	0	0	0	0.0251228	0	0	0
	Candidatus Magasanikbacteria	0	0	0	0	0	0	0	0	0	0	0	0	0	0	0	0	0	0	0	0	0	0	0	0.0579043
	Candidatus Marinimicrobia	0	0	0	0	0	0	0	0	0	0	0	0	0	0	0	0.159062	0	0	0	0.186142	0	0	0	0.0111763
	Candidatus Melainabacteria	0	0	0	0	1.43761	0	0	0	0	0	1.85519	0	0	0	0	1.09607	0.752364	0	1.19991	0	1.73763	0	0	0.891957
	Candidatus Moranbacteria	0	0	0	0	0	0	0	0	0	0	0	0	0	0	0	0	0	0	0	0	0	0	0	0.018771
	Candidatus Nomurabacteria	0	0	0	0	0	0	0	0	0	0	0.275035	0	0	0	0	0	0	0	0	0	0.0140794	0	0	0
	Candidatus Omnitrophica	0	0	0	0	0	0	0	0	0	0	0	0	0	0	0	0	0	0	0.0499521	0	0	0	0	0.359335
	Candidatus Parcubacteria	0	0	0	0	0	0	0	0	0	0	0	0	0	0	0	0	0	0	0	0	0	0	0	0.00916963
	Candidatus Peregrinibacteria	0	0	0	0	0	0	0	0	0	0	0	0	0	0	0	0	0	0	0	0.0811396	0.0376171	0	0	0
	Candidatus Poribacteria	0	0	0	0	0	0	0	0	0	0	0.0881086	0	0	0	0	0.0152827	0	0	0.0127496	0	0	0	0	0
	Candidatus Saccharibacteria	0	0	0	0	3.45594	0	0	0	0	0	0.579271	0	0	0	0	6.33146	6.56044	0	6.99323	0	7.4913	0	0	7.80833
	Candidatus Schekmanbacteria	0	0	0	0	0	0	0	0	0	0	0	0	0	0	0	0	0	0	0	0	0	0	0	0.0791348
	Candidatus Woesearchaeota	0	0	0	0	0	0	0	0	0	0	0	0	0	0	0	0.060099	0	0	0	0	0	0	0	0.0108331
	Chlamydiae	0	0	0	0	0.0691551	0.0150039	0	0	0	0	0	0	0	0	0	0.0370402	0	0	0	0	0	0	0	0
	Chlorobi	0	0	0	0	0.143674	0	0	0	0	0	0	0	0	0	0	0	0	0	0	0	0	0	0	0
	Chloroflexi	0	0	0	0	0.746301	0	0.10031	0.0191167	0.185403	0	0.845838	0	0	0	0.0270339	0.351209	0.316008	0	1.96566	0.230162	0.737661	0	0.0346212	0.716821
	Ciliophora	0	32.3382	0	0	0.336405	0	0	0	0	0	0	0	0	0	0	0	0	0	0	0	0	0	0	1.23398
	Crenarchaeota	0	0	0	0	0	0	0	0	0	0	0	0	0	0	0	0	0	0	0	0	0	0	0	0.102033
	Cyanobacteria	0	7.25138	0	0	0.0718309	0	0	0	0	0	0.122592	0	0	0	0	0.0452128	0	0	0.827084	0	0.369251	0	0	0.0712343
	Deferribacteres	0	0	0	0	0	0	0	0	0	0	0.0810099	0	0	0	0	0.0296229	0	0	0.0514854	0	0.0208221	0	0.0212738	0.0501761
	Deinococcus-Thermus	0	0	0	0	0	0	0	0	0	0	0	0	0	0	0	0	0	0	0	0	0	0	0	0.182154
	Dictyoglomi	0	0	0	0	0	0	0	0	0	0	0	0	0	0	0	0	0	0	0	0	0	0	0	0.0212091
	Elusimicrobia	0	0	0	0	0.267743	0	0	0	0	0	0.284372	0	0	0	0	0.154959	0	0	0.311776	0.105688	0.159864	0	0	0.242647
	Eukaryota_norank	0	0	0	0	0	0	0	0	0	0	0.0233312	0	0	0	0	4.98067	0.0817688	0	0	0	0	0	0	0
	Euryarchaeota	0	0	0	0	0	0.185677	0	0	0	0	0	0	0.15104	8.3893	12.1417	1.0592	0	10.6121	11.9419	0.0435431	0	0	23.7541	11.6456
	Evosea	0	0	0	0	0.0918082	0	0	0	0	0	0	0	0	0	0	0	0	0	0	0	0	0	0	0.0122214
	Fibrobacteres	0	1.86264	0	0	2.07244	0	0	0	0	0	5.01569	0	0	0	0	1.76312	6.96827	0	1.68452	0.294228	1.92385	0	0	2.79975
	Firmicutes	0.566375	0.514014	0	1.3114	331.07	2.6649	0	0	108.09	0	557.189	0	0	0	0	273.468	279.299	0	430.541	60.47	472.191	0.401137	175.685	319.815
	Fungi	0	0	0	0	0	0	0	0	0	0	0.0219141	0	0	0	0	1.42082	0.0545701	0	0.0139006	0	0	0	0	0
	Fusobacteria	0	0	0	0	1.65922	0	0	0	0	0	0.250321	0	0	0	0	0.2656	0.135747	0	1.52668	0.199488	0.143556	0	0	0.182332
	Ignavibacteriae	0	0	0	0	0	0	0	0	0	0	0	0	0	0	0	0.185739	0	0	0.0933194	0.623202	0.288754	0	0	0.0496641
	Kiritimatiellaeota	0	0	0	0	0	0	0	0	0	0	0.0228978	0	0	0	0	0	0	0	0	0	0	0	0	0
	Lentisphaerae	0	0	0	0	0.130961	0	0	0	0	0	0.634103	0	0	0	0	0.187286	0	0	0.381418	0	0.179579	0	0.295349	0.138131
	Metazoa	0	0	0	0	0	0	0	0	0	0	0	0	0	0	0	0.403825	0	0	0	0	0	0	0	0
	Nitrospinae	0	0	0	0	0	0	0	0	0	0	0	0	0	0	0	0	0	0	0	0	0.071321	0	0	0
	Nitrospirae	0	0	0	0	0	0	0	0	0	0	0.132456	0	0	0	0	0.326447	0	0	0	0	0.25893	0	0	0.002613
	NULL-Domain_Unclassified	0	0	0	0	0	0	0	0	0	0	0	0	0	0	0	0	0	0	0	0	0	0	0	0.211817
	Parabasalia	0	0	0	0	0	0	0	0	0	0	0	0	0	0	0	0	0	0	0	0	0	0	0	0.421498
	Planctomycetes	0	0	0	0	0.33764	0	0	0	0	0	1.03399	0	0	0	0	1.14694	1.27442	0	1.10248	0	0	0	2.02994	0.482171
	Proteobacteria	0	3.29734	1.95471	0.207446	5.84142	0.0346466	0.148428	0.123486	1.00698	0.141717	5.23376	0.148963	0	0.318099	0.147782	3.83086	4.58138	0	7.17932	1.94465	8.30787	0.238439	0.266914	7.01662
	Rhodophyta	0	0	0	0	0	0	0	0	0	0	0	0	0	0	0	0	0	0	0	0	0.361787	0	0	0
	Spirochaetes	0	0	0	0	12.1	0	0	0	3.4135	0	10.7027	0	0	0.135859	0	19.0594	10.946	0	1.87701	7.12228	10.5289	0	0	12.025
	Synergistetes	0	0	0	0	0.0141189	0	0	0	0.0496557	0	0.12693	0.0330174	0	0	0	0.0346129	0	0	0.0679737	0.0546968	0	0	0	0.11067
	Tenericutes	0	0	0	0	7.23827	0	0	0	0.835556	0	16.4057	0	0	0	0	6.20923	14.4325	0	24.9537	2.05699	10.5951	0	0	14.1196
	Thermodesulfobacteria	0	0	0	0	0	0	0	0	0	0	0	0	0	0	0	0	0	0	0	0	0.00918744	0	0	0.0350615
	Thermotogae	0	0	0	0	0	0	0	0	0	0	0	0	0	0	0	0	0	0	0.0272744	0.114664	0.0614103	0	0	0.0758228
	Verrucomicrobia	0	0	0.0199587	0	11.4541	0	0	0	0	0	10.7194	0	0	0	0	9.99389	9.32414	0	11.9771	0	11.0189	0	0	11.3061
	Viridiplantae	0	0	0	0	0	0	0	0	0	0	0	0	0	0	0	0.275726	0	0	0.068671	0	0	0	0	0

## Sheet: PPP
Pathway name	Phylum	K01810	K06859	K13810	K15916
Pentose phosphate pathway	Actinobacteria	1.7356	0.136507	0	0
	Armatimonadetes	0.0458986	0	0	0
	Bacteria_norank	37.4368	0.017225	0	0
	Bacteroidetes	151.269	1.54456	0	0
	Candidatus Cryosericota	0	0.0202361	0	0
	Candidatus Melainabacteria	1.43761	0	0	0
	Candidatus Saccharibacteria	3.45594	0	0	0
	Chlamydiae	0.0691551	0.0150039	0	0
	Chlorobi	0.143674	0	0	0
	Chloroflexi	0.746301	0	0.10031	0.0191167
	Ciliophora	0.336405	0	0	0
	Cyanobacteria	0.0718309	0	0	0
	Elusimicrobia	0.267743	0	0	0
	Euryarchaeota	0	0.185677	0	0
	Evosea	0.0918082	0	0	0
	Fibrobacteres	2.07244	0	0	0
	Firmicutes	331.07	2.6649	0	0
	Fusobacteria	1.65922	0	0	0
	Lentisphaerae	0.130961	0	0	0
	Planctomycetes	0.33764	0	0	0
	Proteobacteria	5.84142	0.0346466	0.148428	0.123486
	Spirochaetes	12.1	0	0	0
	Synergistetes	0.0141189	0	0	0
	Tenericutes	7.23827	0	0	0
	Verrucomicrobia	11.4541	0	0	0

[truncated: 1 more sheets: ED]
