# Supplementary material for: Reductive acetogenesis is a dominant process in the ruminant hindgut
Source: Research Square preprint supplement (doi:10.21203/rs.3.rs-4473149/v1), 2024-06-10
Supplement: Supplementary file 3 [file 2c742a896f482166a5e64a61.xlsx]

## Sheet: Phylum
	Rumen			Cecum
Phylum	Mean	SD	SEM	Mean	SD	SEM	P-Value	FDR Adj PValue
Firmicutes	54.7786	11.8673	2.96681	83.2704	7.62626	1.90657	<.0001	2.45118e-05
Bacteroidota	42.0957	10.6031	2.65078	8.76679	2.99638	0.749095	<.0001	1.12463e-05
Verrucomicrobiota	0.00535714	0.00675117	0.00168779	5.44143	7.02114	1.75528	<.0001	1.12463e-05
Proteobacteria	0.103214	0.158214	0.0395535	0.724286	1.59633	0.399081	0.0001	0.000479694
Bacteria_unclassified	0.46	0.170205	0.0425513	0.590714	0.202728	0.0506821	0.0863	0.138059
Actinobacteriota	0.258929	0.712266	0.178067	0.579643	0.445822	0.111455	<.0001	0.000353131
Patescibacteria	0.166429	0.148276	0.0370691	0.243214	0.175122	0.0437804	0.0674	0.126414
Desulfobacterota	0.0628571	0.0739185	0.0184796	0.125714	0.0816963	0.0204241	0.015	0.0358997
Chloroflexi	0.00821429	0.0150419	0.00376047	0.1175	0.141271	0.0353177	0.0244	0.0532825
Cyanobacteria	0.0075	0.0174223	0.00435558	0.0571429	0.0609762	0.015244	0.0003	0.0007861
Acidobacteriota	0.000714286	0.00285714	0.000714286	0.0353571	0.0476823	0.0119206	0.0007	0.00192302
Spirochaetota	1.77857	1.66194	0.415485	0.0246429	0.0467371	0.0116843	<.0001	1.12463e-05
Nitrospirota	0	0	0	0.0107143	0.0257988	0.0064497	0.0737	0.126414
Synergistota	0.00857143	0.0158908	0.0039727	0.00428571	0.00944731	0.00236183	0.5522	0.576231
unknown_unclassified	0.00178571	0.00714286	0.00178571	0.00214286	0.00505749	0.00126437	0.3416	0.372707
Armatimonadota	0	0	0	0.00178571	0.00402374	0.00100593	0.0736	0.126414
Campylobacterota	0	0	0	0.00142857	0.0039036	0.0009759	0.1506	0.212542
Gemmatimonadota	0	0	0	0.00142857	0.0039036	0.0009759	0.1506	0.212542
Bdellovibrionota	0	0	0	0.000714286	0.00285714	0.000714286	0.3173	0.362641
NB1-j	0	0	0	0.000714286	0.00285714	0.000714286	0.3173	0.362641
Fibrobacterota	0.26	0.293731	0.0734328	0	0	0	<.0001	1.94191e-05
Myxococcota	0.00321429	0.0128571	0.00321429	0	0	0	0.3173	0.362641
WPS-2	0.000357143	0.00142857	0.000357143	0	0	0	0.3173	0.362641
Caldisericota	0	0	0	0	0	0	1	1

## Sheet: Genus
	Rumen			Cecum
Genus	Mean	SD	SEM	Mean	SD	SEM	P-Value	FDR Adj PValue
UCG-005	0.145	0.0711538	0.0177884	15.9664	4.33447	1.08362	<.0001	1.33289e-05
Christensenellaceae_R-7_group	5.80393	2.96846	0.742115	15.46	4.63795	1.15949	<.0001	3.82515e-05
Lachnospiraceae_unclassified	5.17857	2.63734	0.659335	10.8754	3.54402	0.886006	<.0001	0.000462903
Oscillospirales_ge	0.296071	0.131573	0.0328932	7.56464	3.52649	0.881622	<.0001	1.33289e-05
Akkermansia	0.00178571	0.00402374	0.00100593	5.44107	7.02089	1.75522	<.0001	1.02277e-05
Monoglobus	0.045	0.0857238	0.021431	4.36714	3.0348	0.758699	<.0001	1.33289e-05
Rikenellaceae_RC9_gut_group	7.87036	4.97983	1.24496	4.24821	2.0847	0.521174	0.0829	0.19718
UCG-010_ge	0.308929	0.205105	0.0512761	3.92321	1.79041	0.447603	<.0001	2.44996e-05
Clostridia_UCG-014_ge	1.19286	0.409001	0.10225	3.35071	1.49255	0.373139	<.0001	0.000186531
Clostridia_unclassified	0.334643	0.161098	0.0402745	2.82893	0.950471	0.237618	<.0001	1.33289e-05
Oscillospiraceae_unclassified	0.128214	0.0742994	0.0185749	1.91214	0.898206	0.224551	<.0001	1.33289e-05
uncultured	0.7025	0.402882	0.10072	1.88429	0.830899	0.207725	<.0001	0.000128804
Ruminococcaceae_unclassified	0.313214	0.199441	0.0498603	1.79179	0.879	0.21975	<.0001	1.45838e-05
NK4A214_group	1.86	0.895335	0.223834	1.65179	0.451934	0.112984	0.6647	0.715115
UCG-002	0.0957143	0.0755353	0.0188838	1.48071	0.829909	0.207477	<.0001	1.33289e-05
Oscillospirales_unclassified	0.0675	0.039326	0.00983149	1.13286	0.454039	0.11351	<.0001	1.33289e-05
Alistipes	0.000714286	0.00285714	0.000714286	0.940714	0.893336	0.223334	<.0001	8.24766e-06
Ruminococcus	1.3475	0.964322	0.24108	0.907143	0.425825	0.106456	0.3859	0.430388
Romboutsia	0	0	0	0.861429	1.35104	0.337759	<.0001	1.23178e-05
F082_ge	3.09286	1.93965	0.484912	0.724643	1.00458	0.251145	<.0001	0.000401264
Bacteria_unclassified	0.46	0.170205	0.0425513	0.590714	0.202728	0.0506821	0.0863	0.203905
Muribaculaceae_ge	6.41714	6.86695	1.71674	0.581429	0.452445	0.113111	<.0001	1.72842e-05
Phascolarctobacterium	0	0	0	0.578929	0.423118	0.10578	<.0001	7.69658e-06
Family_XIII_AD3011_group	0.108214	0.0563939	0.0140985	0.539286	0.148144	0.037036	<.0001	1.33289e-05
Prevotellaceae_UCG-004	0.138571	0.352891	0.0882228	0.477857	0.433728	0.108432	0.0005	0.0026193
UCG-009	0.00321429	0.0080728	0.0020182	0.462143	0.249192	0.0622981	<.0001	1.02277e-05
Escherichia-Shigella	0	0	0	0.452857	1.59766	0.399416	0.0015	0.00633792
Bacteroides	0.000714286	0.00285714	0.000714286	0.437143	0.453797	0.113449	<.0001	1.33289e-05
Bacteroidales_unclassified	0.782143	0.271821	0.0679553	0.381071	0.247473	0.0618682	0.0007	0.00335157
Agathobacter	0	0	0	0.3625	0.216902	0.0542255	<.0001	1.23178e-05
Negativibacillus	0	0	0	0.327143	0.446634	0.111658	<.0001	1.23178e-05
Candidatus_Soleaferrea	0	0	0	0.316786	0.250396	0.062599	<.0001	7.69658e-06
Dorea	0	0	0	0.3	0.29144	0.0728599	<.0001	7.69658e-06
Peptostreptococcaceae_unclassified	0	0	0	0.292857	0.485629	0.121407	<.0001	7.69658e-06
Turicibacter	0	0	0	0.286786	0.457515	0.114379	<.0001	7.69658e-06
Bacteroidia_unclassified	0.106786	0.0606439	0.015161	0.266786	0.342175	0.0855438	0.2658	0.358895
Anaerovoracaceae_ge	0.0432143	0.0624565	0.0156141	0.266429	0.300565	0.0751414	<.0001	0.000175963
Hungateiclostridiaceae_unclassified	0.0296429	0.0232555	0.00581386	0.259286	0.252016	0.0630039	<.0001	0.000202317
Frisingicoccus	0	0	0	0.240714	0.258505	0.0646263	<.0001	7.69658e-06
Saccharofermentans	4.32714	2.77835	0.694587	0.239643	0.255844	0.063961	<.0001	1.33289e-05
Actinobacteria_unclassified	0.000714286	0.00285714	0.000714286	0.238571	0.39048	0.09762	<.0001	0.000165621
Firmicutes_unclassified	0.085	0.0519078	0.012977	0.236786	0.130021	0.0325052	0.0006	0.00314509
Candidatus_Saccharimonas	0.165357	0.148344	0.0370859	0.2325	0.165625	0.0414063	0.0969	0.223557
Christensenellaceae_unclassified	0.0207143	0.0263002	0.00657505	0.231786	0.136713	0.0341783	<.0001	3.76753e-05
dgA-11_gut_group	0	0	0	0.218929	0.206925	0.0517312	<.0001	2.52575e-05
RF39_ge	0.0367857	0.0415204	0.0103801	0.215357	0.198517	0.0496292	0.0004	0.00195735
Lachnospiraceae_NK3A20_group	1.69	0.8285	0.207125	0.211429	0.12903	0.0322575	<.0001	1.33289e-05
Blautia	0.045	0.061893	0.0154733	0.185714	0.359174	0.0897934	0.0139	0.0471776
Tuzzerella	0	0	0	0.178571	0.246015	0.0615038	0.0015	0.00633792
uncultured_ge	0.0482143	0.0363187	0.00907967	0.158214	0.136454	0.0341135	0.0078	0.0277285
Anaerovorax	0.265357	0.120858	0.0302145	0.122857	0.0705739	0.0176435	0.0008	0.00399372
Clostridium_sensu_stricto_1	0	0	0	0.121786	0.297412	0.0743529	0.0002	0.00128913
Anaerovoracaceae_unclassified	0.0567857	0.0530934	0.0132734	0.116071	0.0947428	0.0236857	0.0928	0.215426
Desulfovibrio	0.0496429	0.0609304	0.0152326	0.103214	0.0748686	0.0187171	0.0183	0.0576318
Aeriscardovia	0	0	0	0.0982143	0.186724	0.0466809	0.0015	0.00633792
Acetitomaculum	0.142857	0.129585	0.0323964	0.0964286	0.0821977	0.0205494	0.4282	0.476231
Roseburia	0.134643	0.25652	0.0641299	0.0957143	0.155662	0.0389156	0.4484	0.49633
Colidextribacter	0.00214286	0.00621606	0.00155402	0.0917857	0.111538	0.0278844	0.0013	0.00618866
Oscillibacter	0	0	0	0.0857143	0.0843962	0.0210991	<.0001	0.000512034
Vibrionimonas	0.000357143	0.00142857	0.000357143	0.0789286	0.053573	0.0133933	<.0001	1.33289e-05
Clostridia_vadinBB60_group_ge	0.0075	0.0128147	0.00320369	0.0696429	0.0711031	0.0177758	0.0008	0.0037931
Erysipelotrichaceae_unclassified	0.0164286	0.02	0.005	0.0685714	0.0473516	0.0118379	0.0014	0.00633792
Eggerthellaceae_unclassified	0.00857143	0.0136825	0.00342063	0.0685714	0.0486218	0.0121555	<.0001	6.91919e-05
Lachnoclostridium	0.266071	0.291634	0.0729084	0.0635714	0.056909	0.0142273	0.0089	0.0310773
Family_XIII_UCG-001	0.0228571	0.0345387	0.00863469	0.0625	0.0545495	0.0136374	0.0121	0.0413059
Terrisporobacter	0	0	0	0.0575	0.23	0.0575	0.3173	0.358895
Izemoplasmatales_ge	0	0	0	0.0503571	0.0628128	0.0157032	<.0001	0.000512034
Peptostreptococcales-Tissierellales_unclassified	0.0242857	0.0600589	0.0150147	0.05	0.0316787	0.00791966	0.001	0.00485999
Burkholderiales_unclassified	0.0075	0.0142619	0.00356547	0.0407143	0.0396378	0.00990945	0.0025	0.0100573
Bacteroidales_UCG-001_ge	0.3475	0.58174	0.145435	0.0389286	0.0357295	0.00893238	0.0002	0.00128913
Lachnospiraceae_ge	0.891071	0.390089	0.0975223	0.0382143	0.0531856	0.0132964	<.0001	1.4553e-05
Peptostreptococcales-Tissierellales_fa_unclassified	0	0	0	0.0382143	0.14254	0.035635	0.1508	0.278385
Ruminococcaceae_ge	0.188214	0.19106	0.0477649	0.0375	0.0363187	0.00907967	0.0025	0.0100573
DNF00809	0.0157143	0.0203907	0.00509769	0.0367857	0.0460922	0.011523	0.3432	0.385993
Clostridiaceae_unclassified	0.00142857	0.00442627	0.00110657	0.0360714	0.0371923	0.00929807	0.0003	0.00143021
Gastranaerophilales_ge	0.0025	0.00624881	0.0015622	0.0328571	0.055735	0.0139338	0.0005	0.00255347
Parabacteroides	0	0	0	0.0328571	0.0567414	0.0141854	0.0015	0.00633792
Marvinbryantia	0.0567857	0.0927633	0.0231908	0.0303571	0.0937031	0.0234258	0.5046	0.554899
Ilumatobacteraceae_unclassified	0.0025	0.00751416	0.00187854	0.0303571	0.0376576	0.0094144	0.0255	0.0779332
Rikenellaceae_unclassified	0.0153571	0.0193183	0.00482958	0.0285714	0.0239728	0.00599319	0.066	0.177427
Dechloromonas	0.00214286	0.00719032	0.00179758	0.0285714	0.0472596	0.0118149	0.0667	0.177427
Erysipelatoclostridiaceae_unclassified	0	0	0	0.0257143	0.0295821	0.00739553	0.0002	0.00128913
Blastocatellaceae_unclassified	0.000714286	0.00285714	0.000714286	0.0242857	0.0367081	0.00917702	0.0054	0.020532
Proteiniclasticum	0.005	0.02	0.005	0.0239286	0.0512895	0.0128224	0.0914	0.214647
Butyricicoccus	0	0	0	0.0228571	0.060077	0.0150193	0.0737	0.177427
Rhodanobacter	0	0	0	0.0228571	0.0214825	0.00537062	<.0001	0.000512034
Treponema	1.77643	1.65943	0.414858	0.0217857	0.0463395	0.0115849	<.0001	1.23178e-05
Anaerofustis	0.00392857	0.00714286	0.00178571	0.0217857	0.0213012	0.0053253	0.0069	0.0257004
UCG-001	0.00535714	0.0214286	0.00535714	0.0207143	0.0728767	0.0182192	0.5511	0.599446
Mailhella	0.00107143	0.00428571	0.00107143	0.0203571	0.0313657	0.00784143	0.0251	0.0778292
Mesorhizobium	0	0	0	0.0203571	0.0228542	0.00571354	0.0015	0.00633792
Hydrogenoanaerobacterium	0	0	0	0.0182143	0.0267388	0.00668471	0.0035	0.0134842
C10-SB1A_ge	0	0	0	0.0178571	0.0257143	0.00642857	0.0015	0.00633792
Coprococcus	0.0164286	0.0267922	0.00669806	0.0171429	0.0538074	0.0134519	0.3625	0.406488
Bradyrhizobium	0.0025	0.00691051	0.00172763	0.0171429	0.0297289	0.00743223	0.0744	0.178005
Bifidobacteriaceae_unclassified	0	0	0	0.0167857	0.0671429	0.0167857	0.3173	0.358895
Butyricicoccaceae_unclassified	0	0	0	0.0167857	0.0307702	0.00769254	0.0035	0.0134842
Atopobiaceae_unclassified	0.0203571	0.0468882	0.0117221	0.0164286	0.0256295	0.00640737	0.9137	0.975069
Defluviitaleaceae_UCG-011	0.005	0.0112122	0.00280306	0.0157143	0.0247326	0.00618315	0.1183	0.270006
Chloroflexi_unclassified	0	0	0	0.0157143	0.0357467	0.00893666	0.0035	0.0134842
Tychonema_CCAP_1459-11B	0	0	0	0.0153571	0.0230203	0.00575506	0.0035	0.0134842
Acetoanaerobium	0	0	0	0.0142857	0.03358	0.00839501	0.0737	0.177427
OLB14_ge	0	0	0	0.0139286	0.0224699	0.00561748	0.0035	0.0134842
Peptococcaceae_unclassified	0	0	0	0.0139286	0.0314351	0.00785877	0.0079	0.0277285
Tetrasphaera	0	0	0	0.0125	0.0259958	0.00649895	0.0358	0.102406
Lachnospiraceae_UCG-010	0.000714286	0.0019518	0.00048795	0.0117857	0.0222264	0.0055566	0.1444	0.278385
Incertae_Sedis	0.00964286	0.0165246	0.00413114	0.0114286	0.0154744	0.00386859	0.4488	0.49633
Alphaproteobacteria_unclassified	0	0	0	0.0107143	0.0106138	0.00265345	<.0001	0.000512034
RBG-13-54-9_ge	0.00142857	0.0039036	0.0009759	0.0103571	0.0153641	0.00384102	0.0665	0.177427
A4b_ge	0	0	0	0.0103571	0.0251445	0.00628612	0.0358	0.102406
Atopobium	0.00714286	0.0159591	0.00398978	0.00964286	0.0177932	0.0044483	0.5032	0.554899
Coriobacteriales_unclassified	0.0025	0.00624881	0.0015622	0.00964286	0.0175468	0.00438671	0.1133	0.25993
SJA-15_ge	0	0	0	0.00964286	0.014564	0.00364099	0.0079	0.0277285
Erysipelotrichales_unclassified	0.00214286	0.00719032	0.00179758	0.00928571	0.0161456	0.0040364	0.0919	0.214647
Bacillaceae_unclassified	0	0	0	0.00892857	0.0342202	0.00855504	0.1508	0.278385
Paeniclostridium	0	0	0	0.00892857	0.0261419	0.00653549	0.1508	0.278385
Faecalibacterium	0	0	0	0.00857143	0.0194622	0.00486554	0.0358	0.102406
UCG-007	0.00285714	0.00808122	0.00202031	0.00785714	0.0216716	0.00541791	0.5915	0.641634
IMCC26207	0	0	0	0.00785714	0.0128413	0.00321032	0.0079	0.0277285
LD-RB-34_ge	0	0	0	0.00785714	0.0207479	0.00518698	0.0736	0.177427
Rhodocyclaceae_unclassified	0	0	0	0.00785714	0.0285238	0.00713094	0.1508	0.278385
Mycobacterium	0.00107143	0.00428571	0.00107143	0.0075	0.0148599	0.00371497	0.1361	0.278385
Howardella	0.000714286	0.00285714	0.000714286	0.0075	0.0148599	0.00371497	0.1283	0.278385
Rhodospirillales_unclassified	0.000357143	0.00142857	0.000357143	0.0075	0.00926555	0.00231639	0.0106	0.0367125
Caldilineaceae_unclassified	0	0	0	0.00714286	0.0118952	0.00297381	0.0171	0.0546855
Gammaproteobacteria_unclassified	0	0	0	0.00714286	0.0113329	0.00283323	0.0079	0.0277285
Lutispora	0	0	0	0.00714286	0.024378	0.00609449	0.1508	0.278385
UCG-011_ge	0	0	0	0.00714286	0.0241987	0.00604968	0.0737	0.177427
Clostridiales_unclassified	0	0	0	0.00678571	0.0192619	0.00481547	0.1508	0.278385
Blastocatellaceae_ge	0	0	0	0.00642857	0.010817	0.00270424	0.0079	0.0277285
Saccharimonadales_unclassified	0	0	0	0.00642857	0.0148828	0.00372069	0.0171	0.0546855
Erysipelotrichaceae_ge	0.00214286	0.00621606	0.00155402	0.00607143	0.0140698	0.00351745	0.551	0.599446
Beijerinckiaceae_unclassified	0.00107143	0.00428571	0.00107143	0.00607143	0.0120712	0.0030178	0.136	0.278385
Comamonadaceae_unclassified	0.00107143	0.00428571	0.00107143	0.00571429	0.0123443	0.00308607	0.1521	0.279479
Chitinophaga	0	0	0	0.00571429	0.014901	0.00372526	0.0358	0.102406
Lachnospiraceae_UCG-001	0	0	0	0.00571429	0.0228571	0.00571429	0.3173	0.358895
PLTA13_ge	0	0	0	0.00571429	0.0138407	0.00346017	0.0737	0.177427
Prevotella	19.6371	8.72725	2.18181	0.00535714	0.0111331	0.00278327	<.0001	1.18849e-05
Asinibacterium	0	0	0	0.00535714	0.0122502	0.00306256	0.0737	0.177427
Odoribacter	0	0	0	0.00535714	0.0127722	0.00319305	0.0737	0.177427
Lachnospiraceae_XPB1014_group	12.6907	8.85074	2.21269	0.005	0.0136626	0.00341565	<.0001	9.29595e-06
Anaerolineae_unclassified	0	0	0	0.005	0.00930218	0.00232555	0.0171	0.0546855
Mogibacterium	0	0	0	0.005	0.0133401	0.00333503	0.0737	0.177427
Lachnospiraceae_UCG-008	0.102143	0.0648473	0.0162118	0.00464286	0.00865829	0.00216457	<.0001	2.50055e-05
Actinobacteriota_unclassified	0.00107143	0.00428571	0.00107143	0.00464286	0.00938228	0.00234557	0.144	0.278385
Olsenella	0.00607143	0.0201727	0.00504318	0.00428571	0.0118952	0.00297381	1	1
Nitrospira	0	0	0	0.00428571	0.0118952	0.00297381	0.1508	0.278385
SBR1031_ge	0	0	0	0.00428571	0.00847566	0.00211891	0.0358	0.102406
Bacteroidales_BS11_gut_group_ge	0.100714	0.109874	0.0274686	0.00392857	0.0157143	0.00392857	<.0001	9.27333e-05
Xanthobacteraceae_unclassified	0.00285714	0.00752321	0.0018808	0.00392857	0.0107855	0.00269637	0.7429	0.797117
Cyanobacteriales_unclassified	0	0	0	0.00392857	0.00902755	0.00225689	0.0358	0.102406
Ellin6067	0	0	0	0.00392857	0.0087831	0.00219578	0.0736	0.177427
Eubacteriales_unclassified	0	0	0	0.00392857	0.0157143	0.00392857	0.3173	0.358895
Klebsiella	0	0	0	0.00392857	0.0157143	0.00392857	0.3173	0.358895
Lysinibacillus	0	0	0	0.00392857	0.0157143	0.00392857	0.3173	0.358895
Rhodanobacteraceae_unclassified	0	0	0	0.00392857	0.00853165	0.00213291	0.0736	0.177427
Succiniclasticum	4.94964	3.4724	0.8681	0.00357143	0.00831358	0.0020784	<.0001	1.02277e-05
Breznakia	0	0	0	0.00357143	0.00882174	0.00220544	0.0737	0.177427
Flavonifractor	0	0	0	0.00357143	0.0142857	0.00357143	0.3173	0.358895
GCA-900066575	0	0	0	0.00357143	0.009759	0.00243975	0.1506	0.278385
Oscillospirales_fa_unclassified	0	0	0	0.00357143	0.011594	0.00289851	0.1508	0.278385
Prevotellaceae_UCG-001	0.495	0.328975	0.0822438	0.00321429	0.0093241	0.00233102	<.0001	9.29595e-06
Burkholderia-Caballeronia-Paraburkholderia	0.00535714	0.0146756	0.00366891	0.00321429	0.00859521	0.0021488	0.8348	0.893333
Clostridium_sensu_stricto_10	0	0	0	0.00321429	0.0128571	0.00321429	0.3173	0.358895
Lachnospiraceae_AC2044_group	1.52143	1.39385	0.348463	0.00285714	0.0114286	0.00285714	<.0001	8.24766e-06
Syntrophococcus	0.0546429	0.0902054	0.0225513	0.00285714	0.00885253	0.00221313	0.0255	0.0779332
Oscillospira	0.0107143	0.0329832	0.0082458	0.00285714	0.0100068	0.0025017	0.3756	0.420014
Bacillales_unclassified	0	0	0	0.00285714	0.00885253	0.00221313	0.1508	0.278385
Defluviimonas	0	0	0	0.00285714	0.00808122	0.00202031	0.1508	0.278385
Family_XI_unclassified	0	0	0	0.00285714	0.00808122	0.00202031	0.1508	0.278385
JGI-0000079-D21	0	0	0	0.00285714	0.00625969	0.00156492	0.0736	0.177427
Kouleothrix	0	0	0	0.00285714	0.00659829	0.00164957	0.0736	0.177427
Run-SP154_ge	0	0	0	0.00285714	0.00625969	0.00156492	0.0736	0.177427
Lachnospirales_unclassified	0.0157143	0.0241987	0.00604968	0.0025	0.00509769	0.00127442	0.207	0.358895
KIST-JJY010_ge	0	0	0	0.0025	0.00751416	0.00187854	0.1508	0.278385
Acidimicrobiia_unclassified	0.00428571	0.0171429	0.00428571	0.00214286	0.00857143	0.00214286	0.9642	1
Solobacterium	0.00178571	0.00498979	0.00124745	0.00214286	0.00857143	0.00214286	0.602	0.649413
unknown_unclassified	0.00178571	0.00714286	0.00178571	0.00214286	0.00505749	0.00126437	0.3416	0.385324
V9D2013_group	0.00107143	0.00428571	0.00107143	0.00214286	0.00857143	0.00214286	0.9642	1
Denitratisoma	0	0	0	0.00214286	0.00719032	0.00179758	0.1508	0.278385
DS-100_ge	0	0	0	0.00214286	0.00505749	0.00126437	0.0737	0.177427
Oxalobacter	0	0	0	0.00214286	0.00857143	0.00214286	0.3173	0.358895
Rhizobiales_unclassified	0	0	0	0.00214286	0.0058554	0.00146385	0.0736	0.177427
Butyrivibrio	2.18464	1.29656	0.32414	0.00178571	0.00714286	0.00178571	<.0001	8.24766e-06
Proteobacteria_unclassified	0.000714286	0.00285714	0.000714286	0.00178571	0.00402374	0.00100593	0.3089	0.358895
Saccharimonadales_ge	0.000357143	0.00142857	0.000357143	0.00178571	0.00579702	0.00144925	0.5264	0.575675
Veillonellales-Selenomonadales_unclassified	0.000357143	0.00142857	0.000357143	0.00178571	0.00714286	0.00178571	0.9642	1
1-20_ge	0	0	0	0.00178571	0.00714286	0.00178571	0.3173	0.358895
Bacteroidetes_vadinHA17_ge	0	0	0	0.00178571	0.00402374	0.00100593	0.0736	0.177427
Caldicoprobacter	0	0	0	0.00178571	0.00714286	0.00178571	0.3173	0.358895
Cytophagales_unclassified	0	0	0	0.00178571	0.00498979	0.00124745	0.1508	0.278385
IMCC26256_ge	0	0	0	0.00178571	0.00714286	0.00178571	0.3173	0.358895
Intrasporangiaceae_unclassified	0	0	0	0.00178571	0.00714286	0.00178571	0.3173	0.358895
Microtrichales_unclassified	0	0	0	0.00178571	0.00498979	0.00124745	0.1508	0.278385
Mucinivorans	0	0	0	0.00178571	0.00714286	0.00178571	0.3173	0.358895
Phyllobacterium	0	0	0	0.00178571	0.00714286	0.00178571	0.3173	0.358895
Slackia	0	0	0	0.00178571	0.00714286	0.00178571	0.3173	0.358895
Prevotellaceae_unclassified	0.797857	0.487224	0.121806	0.00142857	0.00442627	0.00110657	<.0001	9.29595e-06
Lachnospiraceae_UCG-002	0.0414286	0.0658012	0.0164503	0.00142857	0.00571429	0.00142857	0.0251	0.0778292
Bacilli_unclassified	0.00535714	0.00642063	0.00160516	0.00142857	0.00329914	0.000824786	0.0469	0.13289
Bradymonadales_ge	0.00392857	0.00772838	0.0019321	0.00142857	0.00571429	0.00142857	0.1795	0.328474
Rhizobiaceae_unclassified	0.0025	0.01	0.0025	0.00142857	0.00571429	0.00142857	0.9642	1
Ahniella	0	0	0	0.00142857	0.0039036	0.0009759	0.1506	0.278385
Brassicibacter	0	0	0	0.00142857	0.00571429	0.00142857	0.3173	0.358895
Campylobacter	0	0	0	0.00142857	0.0039036	0.0009759	0.1506	0.278385
Candidatus_Competibacter	0	0	0	0.00142857	0.00442627	0.00110657	0.1508	0.278385
Coleofasciculaceae_unclassified	0	0	0	0.00142857	0.00442627	0.00110657	0.1508	0.278385
GWE2-31-10	0	0	0	0.00142857	0.0039036	0.0009759	0.1506	0.278385
Alloprevotella	0.00821429	0.0108358	0.00270895	0.00107143	0.00428571	0.00107143	0.0173	0.0548543
CAG-352	0.00714286	0.0285714	0.00714286	0.00107143	0.00428571	0.00107143	0.9642	1
Acetobacteraceae_unclassified	0	0	0	0.00107143	0.00428571	0.00107143	0.3173	0.358895
Aliterella	0	0	0	0.00107143	0.00310803	0.000777008	0.1508	0.278385
Azohydromonas	0	0	0	0.00107143	0.00428571	0.00107143	0.3173	0.358895
Caloramatoraceae_unclassified	0	0	0	0.00107143	0.00428571	0.00107143	0.3173	0.358895
Chitinophagaceae_unclassified	0	0	0	0.00107143	0.0023035	0.000575876	0.0733	0.177427
Clostridium_sensu_stricto_6	0	0	0	0.00107143	0.00428571	0.00107143	0.3173	0.358895
Enterobacteriaceae_unclassified	0	0	0	0.00107143	0.00428571	0.00107143	0.3173	0.358895
Family_XI_ge	0	0	0	0.00107143	0.00428571	0.00107143	0.3173	0.358895
Intestinimonas	0	0	0	0.00107143	0.00428571	0.00107143	0.3173	0.358895
JG36-TzT-191_ge	0	0	0	0.00107143	0.00428571	0.00107143	0.3173	0.358895
KD1-131_ge	0	0	0	0.00107143	0.00428571	0.00107143	0.3173	0.358895
MND1	0	0	0	0.00107143	0.00428571	0.00107143	0.3173	0.358895
MVP-15_ge	0	0	0	0.00107143	0.00428571	0.00107143	0.3173	0.358895
PHOS-HE36_ge	0	0	0	0.00107143	0.00428571	0.00107143	0.3173	0.358895
Saccharimonadaceae_unclassified	0	0	0	0.00107143	0.00428571	0.00107143	0.3173	0.358895
SC-I-84_ge	0	0	0	0.00107143	0.00310803	0.000777008	0.1508	0.278385
Tissierella	0	0	0	0.00107143	0.00428571	0.00107143	0.3173	0.358895
Vicinamibacteraceae_ge	0	0	0	0.00107143	0.00428571	0.00107143	0.3173	0.358895
Vicinamibacterales_ge	0	0	0	0.00107143	0.00310803	0.000777008	0.1508	0.278385
Xanthomonadales_unclassified	0	0	0	0.00107143	0.00428571	0.00107143	0.3173	0.358895
probable_genus_10	1.58679	0.819575	0.204894	0.000714286	0.00285714	0.000714286	<.0001	8.24766e-06
p-251-o5_ge	0.3425	0.336302	0.0840756	0.000714286	0.00285714	0.000714286	<.0001	1.33289e-05
Erysipelotrichaceae_UCG-008	0.00928571	0.0178123	0.00445308	0.000714286	0.00285714	0.000714286	0.121	0.2745
Micrococcales_unclassified	0.00607143	0.0242857	0.00607143	0.000714286	0.00285714	0.000714286	0.9642	1
Flexilinea	0.00321429	0.00721865	0.00180466	0.000714286	0.0019518	0.00048795	0.5118	0.561298
JG30-KF-CM45_ge	0.00285714	0.0114286	0.00285714	0.000714286	0.00285714	0.000714286	0.9642	1
A0839_ge	0.000714286	0.00285714	0.000714286	0.000714286	0.0019518	0.00048795	0.6018	0.649413
Macellibacteroides	0.000714286	0.00285714	0.000714286	0.000714286	0.00285714	0.000714286	1	1
Anaerocella	0	0	0	0.000714286	0.00285714	0.000714286	0.3173	0.358895
BRH-c20a_ge	0	0	0	0.000714286	0.00285714	0.000714286	0.3173	0.358895
Butyricimonas	0	0	0	0.000714286	0.00285714	0.000714286	0.3173	0.358895
Chthonomonas	0	0	0	0.000714286	0.00285714	0.000714286	0.3173	0.358895
Clostridiaceae_ge	0	0	0	0.000714286	0.00285714	0.000714286	0.3173	0.358895
Fimbriimonadales_unclassified	0	0	0	0.000714286	0.00285714	0.000714286	0.3173	0.358895
Fusibacter	0	0	0	0.000714286	0.00285714	0.000714286	0.3173	0.358895
Gaiellales_unclassified	0	0	0	0.000714286	0.00285714	0.000714286	0.3173	0.358895
Gemmatimonadaceae_unclassified	0	0	0	0.000714286	0.00285714	0.000714286	0.3173	0.358895
Geodermatophilus	0	0	0	0.000714286	0.00285714	0.000714286	0.3173	0.358895
hoa5-07d05_gut_group	0	0	0	0.000714286	0.0019518	0.00048795	0.1506	0.278385
Hyphomicrobium	0	0	0	0.000714286	0.00285714	0.000714286	0.3173	0.358895
Ignavibacteriales_unclassified	0	0	0	0.000714286	0.00285714	0.000714286	0.3173	0.358895
Ilumatobacteraceae_ge	0	0	0	0.000714286	0.00285714	0.000714286	0.3173	0.358895
KD4-96_ge	0	0	0	0.000714286	0.00285714	0.000714286	0.3173	0.358895
Methylomonadaceae_unclassified	0	0	0	0.000714286	0.00285714	0.000714286	0.3173	0.358895
NB1-j_ge	0	0	0	0.000714286	0.00285714	0.000714286	0.3173	0.358895
Nostocaceae_unclassified	0	0	0	0.000714286	0.00285714	0.000714286	0.3173	0.358895
OM27_clade	0	0	0	0.000714286	0.00285714	0.000714286	0.3173	0.358895
Parcubacteria_unclassified	0	0	0	0.000714286	0.00285714	0.000714286	0.3173	0.358895
PeM15_ge	0	0	0	0.000714286	0.00285714	0.000714286	0.3173	0.358895
Peptoclostridium	0	0	0	0.000714286	0.00285714	0.000714286	0.3173	0.358895
Proteinivoracales_unclassified	0	0	0	0.000714286	0.00285714	0.000714286	0.3173	0.358895
Proteocatella	0	0	0	0.000714286	0.00285714	0.000714286	0.3173	0.358895
Pseudolabrys	0	0	0	0.000714286	0.00285714	0.000714286	0.3173	0.358895
Pygmaiobacter	0	0	0	0.000714286	0.00285714	0.000714286	0.3173	0.358895
Reyranella	0	0	0	0.000714286	0.00285714	0.000714286	0.3173	0.358895
Rhizobiales_ge	0	0	0	0.000714286	0.00285714	0.000714286	0.3173	0.358895
Rubellimicrobium	0	0	0	0.000714286	0.00285714	0.000714286	0.3173	0.358895
SBR1031_unclassified	0	0	0	0.000714286	0.00285714	0.000714286	0.3173	0.358895
Sphingobacteriales_unclassified	0	0	0	0.000714286	0.00285714	0.000714286	0.3173	0.358895
Sphingomonadaceae_unclassified	0	0	0	0.000714286	0.0019518	0.00048795	0.1506	0.278385
SRB2_ge	0	0	0	0.000714286	0.00285714	0.000714286	0.3173	0.358895
Thauera	0	0	0	0.000714286	0.00285714	0.000714286	0.3173	0.358895
Vampirivibrionia_unclassified	0	0	0	0.000714286	0.00285714	0.000714286	0.3173	0.358895
Bacteroidota_unclassified	0.00285714	0.00722806	0.00180702	0.000357143	0.00142857	0.000357143	0.1432	0.278385
Hyphomicrobiaceae_unclassified	0.00107143	0.00428571	0.00107143	0.000357143	0.00142857	0.000357143	0.9642	1
Anaerolineaceae_unclassified	0.000714286	0.00285714	0.000714286	0.000357143	0.00142857	0.000357143	0.9642	1
Acidobacteriota_unclassified	0	0	0	0.000357143	0.00142857	0.000357143	0.3173	0.358895
Anaerolinea	0	0	0	0.000357143	0.00142857	0.000357143	0.3173	0.358895
Asaccharospora	0	0	0	0.000357143	0.00142857	0.000357143	0.3173	0.358895
CL500-29_marine_group	0	0	0	0.000357143	0.00142857	0.000357143	0.3173	0.358895
Competibacteraceae_unclassified	0	0	0	0.000357143	0.00142857	0.000357143	0.3173	0.358895
Devosiaceae_unclassified	0	0	0	0.000357143	0.00142857	0.000357143	0.3173	0.358895
Fimbriimonadaceae_ge	0	0	0	0.000357143	0.00142857	0.000357143	0.3173	0.358895
Iamia	0	0	0	0.000357143	0.00142857	0.000357143	0.3173	0.358895
JG30-KF-CM66_ge	0	0	0	0.000357143	0.00142857	0.000357143	0.3173	0.358895
JG36-GS-52_ge	0	0	0	0.000357143	0.00142857	0.000357143	0.3173	0.358895
Neisseria	0	0	0	0.000357143	0.00142857	0.000357143	0.3173	0.358895
Phormidiaceae_unclassified	0	0	0	0.000357143	0.00142857	0.000357143	0.3173	0.358895
Prosthecomicrobium	0	0	0	0.000357143	0.00142857	0.000357143	0.3173	0.358895
Pseudomonas	0	0	0	0.000357143	0.00142857	0.000357143	0.3173	0.358895
Rhodobacteraceae_unclassified	0	0	0	0.000357143	0.00142857	0.000357143	0.3173	0.358895
Rubrobacter	0	0	0	0.000357143	0.00142857	0.000357143	0.3173	0.358895
Saprospiraceae_unclassified	0	0	0	0.000357143	0.00142857	0.000357143	0.3173	0.358895
SJA-28_ge	0	0	0	0.000357143	0.00142857	0.000357143	0.3173	0.358895
Steroidobacteraceae_unclassified	0	0	0	0.000357143	0.00142857	0.000357143	0.3173	0.358895
SWB02	0	0	0	0.000357143	0.00142857	0.000357143	0.3173	0.358895
Thermoleophilia_unclassified	0	0	0	0.000357143	0.00142857	0.000357143	0.3173	0.358895
Variovorax	0	0	0	0.000357143	0.00142857	0.000357143	0.3173	0.358895
Verrucomicrobiae_unclassified	0	0	0	0.000357143	0.00142857	0.000357143	0.3173	0.358895
Veillonellaceae_UCG-001	1.70964	1.16653	0.291632	0	0	0	<.0001	7.69658e-06
Prevotellaceae_NK3B31_group	1.33429	1.85797	0.464493	0	0	0	<.0001	7.69658e-06
Pseudobutyrivibrio	0.933571	0.547737	0.136934	0	0	0	<.0001	7.69658e-06
Moryella	0.636429	0.759838	0.189959	0	0	0	<.0001	7.69658e-06
Lachnospiraceae_ND3007_group	0.486071	0.335447	0.0838617	0	0	0	<.0001	7.69658e-06
Prevotellaceae_UCG-003	0.411429	0.448737	0.112184	0	0	0	<.0001	7.69658e-06
Lachnospiraceae_FCS020_group	0.343214	0.245696	0.0614241	0	0	0	<.0001	1.23178e-05
Oribacterium	0.265	0.228903	0.0572258	0	0	0	<.0001	7.69658e-06
Fibrobacter	0.258929	0.294085	0.0735212	0	0	0	<.0001	2.52575e-05
Anaerovibrio	0.165	0.146266	0.0365665	0	0	0	<.0001	1.23178e-05
Promicromonosporaceae_unclassified	0.163214	0.618038	0.15451	0	0	0	0.0171	0.0546855
Papillibacter	0.145357	0.0670618	0.0167654	0	0	0	<.0001	1.23178e-05
Selenomonadaceae_unclassified	0.105714	0.140653	0.0351634	0	0	0	<.0001	7.39534e-05
FD2005	0.0971429	0.156186	0.0390465	0	0	0	0.0015	0.00633792
Selenomonas	0.0946429	0.16725	0.0418126	0	0	0	<.0001	7.39534e-05
Shuttleworthia	0.0878571	0.242022	0.0605055	0	0	0	0.0015	0.00633792
U29-B03	0.0525	0.060302	0.0150755	0	0	0	0.0002	0.00128913
Lachnospiraceae_UCG-009	0.0364286	0.0817729	0.0204432	0	0	0	0.0737	0.177427
Bacteroidales_RF16_group_ge	0.0360714	0.0585621	0.0146405	0	0	0	0.0002	0.00128913
Prevotellaceae_Ga6A1_group	0.0307143	0.0323838	0.00809594	0	0	0	<.0001	0.000512034
Ruminiclostridium	0.025	0.0527812	0.0131953	0	0	0	0.0035	0.0134842
Ruminobacter	0.0242857	0.0971429	0.0242857	0	0	0	0.3173	0.358895
UCG-004	0.0242857	0.039727	0.00993174	0	0	0	0.0006	0.00303479
Lachnospiraceae_UCG-006	0.0228571	0.0246002	0.00615005	0	0	0	<.0001	0.000201891
NED5E9	0.0217857	0.0598308	0.0149577	0	0	0	0.0171	0.0546855
Quinella	0.015	0.033507	0.00837676	0	0	0	0.0359	0.102406
Luteimonas	0.0135714	0.0542857	0.0135714	0	0	0	0.3173	0.358895
Lachnospiraceae_NK4A136_group	0.0117857	0.0471429	0.0117857	0	0	0	0.3173	0.358895
Anaeroplasma	0.0107143	0.0145873	0.00364682	0	0	0	0.0035	0.0134842
Succinivibrionaceae_UCG-002	0.0103571	0.0299637	0.00749092	0	0	0	0.0358	0.102406
Succinivibrio	0.00964286	0.0133146	0.00332865	0	0	0	0.0079	0.0277285
Micrococcaceae_unclassified	0.00821429	0.0299455	0.00748638	0	0	0	0.1508	0.278385
Desulfobulbus	0.0075	0.0155751	0.00389379	0	0	0	0.017	0.0546855
Ornithinimicrobium	0.00714286	0.0256825	0.00642063	0	0	0	0.1508	0.278385
Bacteroidetes_BD2-2_ge	0.00607143	0.0181265	0.00453163	0	0	0	0.1508	0.278385
Muribaculaceae_unclassified	0.00607143	0.0132737	0.00331842	0	0	0	0.0171	0.0546855
p-2534-18B5_gut_group_ge	0.00571429	0.0228571	0.00571429	0	0	0	0.3173	0.358895
Fretibacterium	0.00535714	0.0111331	0.00278327	0	0	0	0.0358	0.102406
Chloroplast_ge	0.005	0.0123222	0.00308055	0	0	0	0.0736	0.177427
Acholeplasmataceae_unclassified	0.00357143	0.00997957	0.00249489	0	0	0	0.1508	0.278385
Bacillus	0.00357143	0.0142857	0.00357143	0	0	0	0.3173	0.358895
BIrii41_ge	0.00321429	0.0128571	0.00321429	0	0	0	0.3173	0.358895
Pyramidobacter	0.00321429	0.0128571	0.00321429	0	0	0	0.3173	0.358895
Galbibacter	0.00285714	0.0114286	0.00285714	0	0	0	0.3173	0.358895
Planococcaceae_unclassified	0.00285714	0.0114286	0.00285714	0	0	0	0.3173	0.358895
Prevotellaceae_YAB2003_group	0.00285714	0.00625969	0.00156492	0	0	0	0.0736	0.177427
Allorhizobium-Neorhizobium-Pararhizobium-Rhizobium	0.0025	0.01	0.0025	0	0	0	0.3173	0.358895
Erysipelothrix	0.0025	0.00691051	0.00172763	0	0	0	0.1508	0.278385
MWH-CFBk5_ge	0.0025	0.01	0.0025	0	0	0	0.3173	0.358895
WCHB1-41_ge	0.0025	0.00624881	0.0015622	0	0	0	0.0737	0.177427
Comamonas	0.00214286	0.00857143	0.00214286	0	0	0	0.3173	0.358895
possible_genus_Sk018	0.00214286	0.00857143	0.00214286	0	0	0	0.3173	0.358895
Erysipelotrichaceae_UCG-009	0.00178571	0.00714286	0.00178571	0	0	0	0.3173	0.358895
Mitochondria_ge	0.00178571	0.00579702	0.00144925	0	0	0	0.1508	0.278385
Acidaminococcaceae_unclassified	0.00142857	0.00571429	0.00142857	0	0	0	0.3173	0.358895
Verticiella	0.00142857	0.00571429	0.00142857	0	0	0	0.3173	0.358895
Amb-16S-1323_ge	0.00107143	0.00428571	0.00107143	0	0	0	0.3173	0.358895
Cellvibrio	0.00107143	0.00428571	0.00107143	0	0	0	0.3173	0.358895
Fibrobacteraceae_unclassified	0.00107143	0.00310803	0.000777008	0	0	0	0.1508	0.278385
Negativicutes_unclassified	0.00107143	0.00310803	0.000777008	0	0	0	0.1508	0.278385
Nitrobacter	0.00107143	0.00428571	0.00107143	0	0	0	0.3173	0.358895
Ornithinibacillus	0.00107143	0.00428571	0.00107143	0	0	0	0.3173	0.358895
Succinivibrionaceae_unclassified	0.00107143	0.00428571	0.00107143	0	0	0	0.3173	0.358895
Chitinophagales_unclassified	0.000714286	0.00285714	0.000714286	0	0	0	0.3173	0.358895
Desulfuromonadales_unclassified	0.000714286	0.00285714	0.000714286	0	0	0	0.3173	0.358895
Ellin6055	0.000714286	0.00285714	0.000714286	0	0	0	0.3173	0.358895
env.OPS_17_ge	0.000714286	0.00285714	0.000714286	0	0	0	0.3173	0.358895
Lachnospiraceae_FE2018_group	0.000714286	0.00285714	0.000714286	0	0	0	0.3173	0.358895
Lautropia	0.000714286	0.00285714	0.000714286	0	0	0	0.3173	0.358895
M2PT2-76_termite_group	0.000714286	0.00285714	0.000714286	0	0	0	0.3173	0.358895
Prevotellaceae_ge	0.000714286	0.00285714	0.000714286	0	0	0	0.3173	0.358895
Rhodococcus	0.000714286	0.00285714	0.000714286	0	0	0	0.3173	0.358895
Sediminispirochaeta	0.000714286	0.00285714	0.000714286	0	0	0	0.3173	0.358895
Spirochaetaceae_unclassified	0.000714286	0.00285714	0.000714286	0	0	0	0.3173	0.358895
Streptococcaceae_unclassified	0.000714286	0.00285714	0.000714286	0	0	0	0.3173	0.358895
Sulfuritalea	0.000714286	0.00285714	0.000714286	0	0	0	0.3173	0.358895
Terrimicrobium	0.000714286	0.00285714	0.000714286	0	0	0	0.3173	0.358895
TM7a	0.000714286	0.00285714	0.000714286	0	0	0	0.3173	0.358895
Chthoniobacteraceae_unclassified	0.000357143	0.00142857	0.000357143	0	0	0	0.3173	0.358895
Clostridium_sensu_stricto_7	0.000357143	0.00142857	0.000357143	0	0	0	0.3173	0.358895
Janibacter	0.000357143	0.00142857	0.000357143	0	0	0	0.3173	0.358895
Lachnospiraceae_NC2004_group	0.000357143	0.00142857	0.000357143	0	0	0	0.3173	0.358895
Paracoccus	0.000357143	0.00142857	0.000357143	0	0	0	0.3173	0.358895
WPS-2_ge	0.000357143	0.00142857	0.000357143	0	0	0	0.3173	0.358895
