# Supplementary material for: Reductive acetogenesis is a dominant process in the ruminant hindgut
Source: Research Square preprint supplement (doi:10.21203/rs.3.rs-4473149/v1), 2024-06-10
Supplement: Supplementary file 4 [file 3a199d1a8c50ba30a3badb3b.xlsx]

## Sheet: summary
Class	number
GH	147
GT	93
CBM	87
PL	37
CE	18
AA	17

## Sheet: GH
	Rumen			Cecum
Family	Mean	SD	SEM	Mean	SD	SEM	P value	FDR Adj PValue
GH43	1759.73	396.85	99.2125	825.195	140.013	35.0033	<.0001	8.04794e-06
GH2	1323.45	309.143	77.2858	1421.57	102.184	25.5459	0.2	0.231548
GH3	1552.84	261.623	65.4057	1106.48	87.1248	21.7812	<.0001	7.32098e-05
GH13	1688.23	182.224	45.5561	1861.8	150.333	37.5832	0.0083	0.0115577
GH5	913.552	138.73	34.6824	525.076	95.2793	23.8198	<.0001	6.74298e-06
GH97	483.408	134.23	33.5574	156.012	46.5576	11.6394	<.0001	6.99527e-06
GH28	475.032	130.458	32.6144	382.389	66.5132	16.6283	0.0458	0.0575053
GH109	702.495	116.064	29.0161	1773.93	234.842	58.7106	<.0001	6.45786e-06
GH23	494.118	104.723	26.1808	320.882	60.861	15.2153	<.0001	0.000152619
GH73	430.917	103.931	25.9827	256.734	37.8164	9.4541	<.0001	2.53722e-05
GH51	388.188	99.0214	24.7554	209.918	41.1101	10.2775	<.0001	3.41306e-05
GH92	336.343	98.508	24.627	210.327	59.542	14.8855	0.0003	0.000507205
GH78	389.546	95.1069	23.7767	682.835	117.744	29.436	<.0001	2.02251e-05
GH31	600.629	89.3791	22.3448	423.892	60.9881	15.247	<.0001	2.968e-05
GH20	287.549	78.6385	19.6596	692.035	155.955	38.9888	<.0001	6.45786e-06
GH25	542.889	78.5679	19.642	439.782	65.2552	16.3138	0.001	0.00164702
GH29	315.118	77.7822	19.4455	406.931	56.1824	14.0456	0.0037	0.00544978
GH115	224.385	71.5677	17.8919	51.747	8.93308	2.23327	<.0001	6.45786e-06
GH10	413.277	70.3043	17.5761	219.037	54.683	13.6707	<.0001	8.04794e-06
GH9	366.145	64.9453	16.2363	142.783	85.8243	21.4561	<.0001	4.57668e-05
GH106	247.459	62.6546	15.6637	260.322	43.86	10.965	0.6242	0.650725
GH95	243.911	62.0481	15.512	241.287	37.1577	9.28942	0.8802	0.880168
GH105	219.397	59.5177	14.8794	145.088	19.6025	4.90062	0.0002	0.000387059
GH35	163.29	57.5523	14.3881	127.554	27.3565	6.83913	0.0899	0.1092
GH33	170.256	55.524	13.881	411.453	50.0177	12.5044	<.0001	6.45786e-06
GH146	151.902	53.6706	13.4177	118.089	22.1275	5.53188	0.0458	0.0575053
GH53	229.625	53.3035	13.3259	94.8499	14.4088	3.60219	<.0001	6.45786e-06
GH26	257.346	51.154	12.7885	117.317	44.266	11.0665	<.0001	1.20559e-05
GH36	221.352	49.5089	12.3772	414.436	71.1133	17.7783	<.0001	6.99527e-06
GH30	192.075	48.7974	12.1994	165.6	58.7647	14.6912	0.05	0.061785
GH32	264.75	47.7284	11.9321	117.014	24.229	6.05726	<.0001	6.45786e-06
GH16	315.702	46.1398	11.5349	340.571	93.9457	23.4864	0.4975	0.533833
GH77	330.842	44.2272	11.0568	487.935	21.9604	5.4901	<.0001	6.45786e-06
GH45	53.3164	42.4317	10.6079	0.275431	0.817111	0.204278	<.0001	6.45786e-06
GH127	174.388	41.3843	10.3461	183.002	34.3654	8.59135	0.5217	0.555735
GH27	213.378	39.2165	9.80414	140.299	23.6004	5.9001	<.0001	2.32419e-05
GH57	164.007	38.5239	9.63099	130.16	31.8325	7.95814	0.0059	0.00863965
GH171	129.304	34.6352	8.6588	116.078	24.1671	6.04178	0.0973	0.117184
GH130	166.989	33.673	8.41824	121.608	18.418	4.60451	<.0001	0.00017381
GH133	135.589	32.6993	8.17482	137.539	18.3866	4.59664	0.8802	0.880168
GH8	104.596	31.8148	7.95371	33.1011	8.77656	2.19414	<.0001	6.45786e-06
GH11	63.577	30.7326	7.68315	17.6389	27.0729	6.76822	<.0001	3.92348e-05
GH24	156.34	29.0872	7.27179	177.641	40.6124	10.1531	0.1051	0.123596
GH94	270.178	29.0174	7.25434	211.936	52.2003	13.0501	0.0012	0.00183233
GH18	187.014	28.0363	7.00909	255.562	33.9502	8.48755	<.0001	1.04566e-05
GH4	144.306	28.003	7.00076	297.6	31.303	7.82576	<.0001	6.45786e-06
GH74	95.0776	26.8008	6.70021	72.3139	26.6891	6.67227	0.0176	0.0237053
GH76	83.0574	26.6725	6.66813	45.8882	14.5868	3.64669	0.0001	0.000195281
GH89	91.3142	26.0857	6.52143	83.2689	19.0109	4.75274	0.2427	0.276523
GH67	78.4435	22.1775	5.54437	28.8241	8.17482	2.0437	<.0001	9.46606e-06
GH141	73.2497	18.6944	4.6736	165.572	51.6527	12.9132	<.0001	2.53722e-05
GH99	79.5222	18.6352	4.65881	124.694	29.098	7.27451	<.0001	0.00013393
GH140	49.0539	17.0365	4.25913	27.7139	6.03361	1.5084	<.0001	0.000152619
GH42	45.3734	16.5224	4.13059	125.387	20.3635	5.09088	<.0001	6.45786e-06
GH1	66.7374	16.5018	4.12546	129.648	29.5082	7.37705	<.0001	1.04566e-05
GH120	70.8832	16.2545	4.06363	30.2256	12.2014	3.05035	<.0001	1.04566e-05
GH63	22.521	15.7519	3.93796	63.8156	18.4039	4.60097	<.0001	3.92348e-05
GH128	32.3091	15.265	3.81624	16.1898	7.20478	1.8012	0.0009	0.00145581
GH154	57.5719	15.1707	3.79267	33.3464	6.83578	1.70895	<.0001	2.32419e-05
GH125	56.7502	14.3604	3.59011	58.0317	8.645	2.16125	0.8505	0.86226
GH39	85.0161	14.2467	3.56168	274.628	80.4992	20.1248	<.0001	6.45786e-06
GH163	55.9414	13.7229	3.43072	306.938	82.2928	20.5732	<.0001	6.45786e-06
GH98	24.9076	13.7	3.425	25.4625	11.6227	2.90568	0.7345	0.755003
GH88	45.1596	13.2558	3.31395	150.053	109.942	27.4854	<.0001	6.45786e-06
GH166	22.8167	12.1785	3.04463	9.40076	3.34214	0.835536	<.0001	9.85569e-05
GH93	23.2124	10.887	2.72174	34.954	13.6493	3.41232	0.0083	0.0115577
GH38	54.6542	9.96369	2.49092	333.913	98.3761	24.594	<.0001	6.45786e-06
GH84	33.1216	9.25148	2.31287	85.0858	30.8267	7.70668	<.0001	1.20559e-05
GH108	19.0122	8.75722	2.18931	13.6722	10.2806	2.57016	0.0418	0.0539395
GH19	16.1586	8.32809	2.08202	5.04513	2.43844	0.60961	<.0001	0.00017381
GH138	16.1275	8.31353	2.07838	1.30485	0.863387	0.215847	<.0001	6.74298e-06
GH142	28.6575	8.27618	2.06905	19.5141	4.85372	1.21343	0.0015	0.00229588
GH15	14.3333	8.1324	2.0331	31.2974	10.635	2.65874	0.0002	0.000387059
GH110	13.4235	7.97003	1.99251	119.8	26.8555	6.71389	<.0001	6.45786e-06
GH54	18.7637	7.90835	1.97709	2.51992	1.97677	0.494192	<.0001	6.74298e-06
GH143	16.4626	7.85835	1.96459	3.1692	0.862912	0.215728	<.0001	6.45786e-06
GH137	17.9908	7.69245	1.92311	10.7954	3.80484	0.95121	0.0006	0.0010094
GH123	25.4974	7.65876	1.91469	173.364	30.6762	7.66906	<.0001	6.45786e-06
GH158	12.048	7.60019	1.90005	15.1083	9.82257	2.45564	0.407	0.446503
GH139	15.0998	7.11701	1.77925	2.1041	1.21422	0.303555	<.0001	6.99527e-06
GH151	26.1973	7.03465	1.75866	116.731	23.9315	5.98288	<.0001	6.45786e-06
GH124	19.7184	6.78209	1.69552	23.1748	11.381	2.84526	0.4975	0.533833
GH87	8.62299	6.42491	1.60623	2.77598	1.27069	0.317674	0.0001	0.000195281
GH129	25.5908	6.424	1.606	70.37	20.4314	5.10786	<.0001	6.74298e-06
GH104	4.6148	6.36394	1.59099	6.20593	4.25008	1.06252	0.0317	0.0415963
GH126	9.10613	6.05607	1.51402	2.28156	2.28789	0.571972	<.0001	9.85569e-05
GH136	15.5536	5.9493	1.48733	88.7889	35.9279	8.98198	<.0001	6.45786e-06
GH117	14.5523	5.90722	1.4768	31.5216	15.9145	3.97862	0.0001	0.000195281
GH65	19.3554	5.41147	1.35287	49.9385	9.08335	2.27084	<.0001	6.45786e-06
GH64	8.04095	5.1078	1.27695	0.521632	0.398878	0.0997195	<.0001	6.99527e-06
GH55	14.8359	4.988	1.247	11.327	5.04315	1.26079	0.0899	0.1092
GH144	21.3178	4.8347	1.20868	40.6484	10.8447	2.71118	<.0001	2.53722e-05
GH44	7.54376	4.66035	1.16509	2.98193	2.04428	0.51107	0.0002	0.000297582
GH66	11.0279	4.58252	1.14563	9.44923	6.03149	1.50787	0.2913	0.324394
GH156	11.2714	4.54519	1.1363	39.398	9.85225	2.46306	<.0001	6.45786e-06
GH113	11.0817	4.54285	1.13571	17.9	5.56983	1.39246	0.0007	0.00113327
GH148	16.6627	4.41525	1.10381	34.7327	21.703	5.42576	<.0001	3.41306e-05
GH149	10.016	4.2915	1.07287	0.716878	1.10806	0.277016	<.0001	6.45786e-06
GH170	9.63434	3.85749	0.964372	16.5013	6.03728	1.50932	0.0015	0.00229588
GH116	10.9481	3.68421	0.921053	37.0401	11.1476	2.78691	<.0001	6.74298e-06
GH164	9.53076	3.56191	0.890477	27.0068	9.78119	2.4453	<.0001	6.99527e-06
GH50	10.6575	3.40384	0.850961	20.9281	10.4929	2.62324	0.0014	0.0020571
GH59	6.42222	3.26971	0.817427	2.42098	1.34205	0.335512	<.0001	7.32098e-05
GH114	3.58839	3.02861	0.757152	2.69603	1.17324	0.293309	0.6242	0.650725
GH48	3.45176	2.90799	0.726996	2.17247	4.55231	1.13808	0.0083	0.0115577
GH161	6.17756	2.83232	0.708079	11.2221	4.52825	1.13206	0.0007	0.00113327
GH22	3.80154	2.77841	0.694603	0.478828	0.938297	0.234574	<.0001	2.53722e-05
GH119	0.746163	2.68931	0.672326	0.00541644	0.00897313	0.00224328	0.0012	0.00183233
GH82	3.26613	2.62044	0.655111	4.38992	2.65356	0.66339	0.05	0.061785
GH103	1.93035	2.59209	0.648022	4.21569	3.08219	0.770548	0.0002	0.000297582
GH47	2.70219	2.44763	0.611907	1.65687	1.33871	0.334677	0.2278	0.261614
GH46	2.50472	2.34178	0.585446	1.03869	0.706936	0.176734	0.0215	0.0287366
GH37	7.20312	2.24874	0.562185	41.9979	13.3375	3.33437	<.0001	6.45786e-06
GH81	3.59119	2.15743	0.539358	2.05077	2.05728	0.51432	0.0067	0.0095919
GH85	3.82845	2.15016	0.537539	19.1143	28.0329	7.00822	0.0002	0.000341627
GH165	3.37104	2.11961	0.529903	50.2664	20.3173	5.07932	<.0001	6.45786e-06
GH159	4.21511	1.9432	0.485799	4.74401	1.6682	0.41705	0.451	0.49107
GH112	6.2725	1.65166	0.412915	43.7938	13.0405	3.26012	<.0001	6.45786e-06
GH91	1.22812	1.26553	0.316382	6.62731	7.18564	1.79641	<.0001	2.53722e-05
GH147	1.25953	1.25591	0.313977	0.899097	0.895943	0.223986	0.3461	0.382508
GH160	2.21003	1.12821	0.282052	1.53891	0.745313	0.186328	0.1051	0.123596
GH153	0.668515	0.867408	0.216852	3.0109	2.84136	0.710339	0.0012	0.00183233
GH169	0.807572	0.851175	0.212794	1.30533	0.944802	0.2362	0.0458	0.0575053
GH167	0.620453	0.768083	0.192021	18.022	17.1969	4.29923	<.0001	6.99527e-06
GH102	1.24171	0.708844	0.177211	2.77568	1.5486	0.38715	0.0008	0.00128523
GH17	1.58336	0.574889	0.143722	1.43785	0.873989	0.218497	0.2913	0.324394
GH12	0.60431	0.552934	0.138233	0.438751	0.172261	0.0430653	0.7345	0.755003
GH71	0.317941	0.519301	0.129825	0.474731	0.335406	0.0838515	0.026	0.034479
GH79	0.662391	0.445274	0.111318	91.2278	17.9166	4.47915	<.0001	6.45786e-06
GH6	0.595665	0.386286	0.0965715	0.00415263	0.00941119	0.0023528	<.0001	6.45786e-06
GH168	0.320285	0.300309	0.0750773	0.323695	0.21462	0.0536549	0.7919	0.808415
GH80	0.493724	0.290608	0.0726519	0.70406	0.547193	0.136798	0.2582	0.291959
GH134	0.672786	0.289922	0.0724805	3.95164	5.82089	1.45522	0.0129	0.0176751
GH135	0.143204	0.230566	0.0576414	0.615956	0.722623	0.180656	0.0005	0.000883818
GH62	0.0618151	0.166454	0.0416134	0.0957991	0.276609	0.0691523	0.5817	0.615199
GH157	0.0715763	0.157813	0.0394533	0	0	0	0.0359	0.046643
GH121	0.112146	0.157164	0.0392909	0.0120897	0.0152489	0.00381223	0.0151	0.0205016
GH14	0.0399229	0.118431	0.0296077	0.0724407	0.161781	0.0404452	0.0984	0.117608
GH75	0.0988553	0.117435	0.0293587	11.5125	12.4561	3.11402	<.0001	6.45786e-06
GH49	0.101273	0.0971941	0.0242985	0.0356644	0.0747739	0.0186935	0.0081	0.0115245
GH107	0.0742631	0.0862655	0.0215664	0.252405	0.134261	0.0335653	0.0001	0.000218594
GH72	0.0456123	0.0770199	0.019255	2.30597	1.44133	0.360332	<.0001	6.45786e-06
GH101	0	0	0	4.66712	5.90941	1.47735	<.0001	6.45786e-06
GH52	0	0	0	0.800055	0.696518	0.174129	<.0001	6.45786e-06
GH100	0	0	0	0.391149	0.781429	0.195357	<.0001	1.01482e-05
GH86	0	0	0	0.0460961	0.0774866	0.0193717	0.0002	0.00042147
GH152	0	0	0	0.0267788	0.10285	0.0257126	0.1508	0.17589

## Sheet: GT
	Rumen			Cecum
Family	Mean	SD	SEM	Mean	SD	SEM	P value	FDR Adj PValue
GT1	64.5377	22.6244	5.65609	116.56	14.0422	3.51054	<.0001	4.49291e-05
GT2	5893.73	683.124	170.781	4297.41	351.853	87.9633	<.0001	2.2912e-05
GT3	114.738	26.3489	6.58722	64.9377	23.2963	5.82408	<.0001	0.000197218
GT4	3279.95	441.743	110.436	2538.47	200.658	50.1644	<.0001	3.54937e-05
GT5	431.7	43.6985	10.9246	446.015	33.0316	8.25791	0.6511	0.704071
GT6	12.7566	8.36531	2.09133	10.4062	8.5237	2.13092	0.3461	0.417991
GT7	4.36647	4.82471	1.20618	5.50931	5.34156	1.33539	0.1134	0.146522
GT8	409.622	85.9073	21.4768	216.836	34.2081	8.55202	<.0001	1.8677e-05
GT9	151.629	37.0359	9.25898	97.461	52.6392	13.1598	0.0018	0.00371772
GT10	71.5864	24.9933	6.24834	36.6881	30.0287	7.50718	0.0003	0.000745035
GT11	108.698	33.3768	8.34421	65.4285	31.1703	7.79259	0.0004	0.00108308
GT12	6.18012	4.41328	1.10332	9.89108	5.17867	1.29467	0.0042	0.00826821
GT13	59.5278	22.7881	5.69702	24.041	9.57787	2.39447	<.0001	4.81554e-05
GT14	41.3875	11.2306	2.80766	29.665	9.95763	2.48941	0.0053	0.0102444
GT15	0.0199077	0.0656149	0.0164037	0.0151913	0.0436153	0.0109038	0.9779	0.977927
GT17	13.5429	5.82236	1.45559	6.37751	3.6248	0.9062	0.0007	0.00174397
GT19	184.925	39.0953	9.77382	179.65	35.0034	8.75084	0.5217	0.591696
GT20	55.1202	42.1131	10.5283	0.446422	0.565485	0.141371	<.0001	1.8677e-05
GT21	6.77812	3.99549	0.998873	6.35438	5.61578	1.40394	0.4287	0.492178
GT22	6.5388	4.58431	1.14608	3.29451	1.59661	0.399151	0.0317	0.0499559
GT23	42.8693	12.8343	3.20858	21.8444	13.5034	3.37586	0.0002	0.00070929
GT24	0.0132453	0.0385671	0.00964178	3.15552	5.52797	1.38199	<.0001	3.2035e-05
GT25	25.2734	15.139	3.78474	17.9118	15.7181	3.92953	0.0648	0.0941369
GT26	109.197	29.8658	7.46646	209.726	13.9125	3.47813	<.0001	1.8677e-05
GT27	47.3068	14.2072	3.55179	24.0626	6.4997	1.62493	<.0001	7.96248e-05
GT28	389.58	68.0692	17.0173	574.45	42.1906	10.5476	<.0001	1.97301e-05
GT29	0.207703	0.408799	0.1022	0.29709	0.228413	0.0571032	0.0125	0.021961
GT30	118.991	28.0093	7.00233	64.7439	31.6144	7.90361	0.0001	0.000356908
GT31	2.86851	1.71903	0.429758	13.6592	16.112	4.02801	0.0215	0.0357113
GT32	183.288	37.988	9.49699	129.581	27.3129	6.82822	0.0003	0.000836246
GT33	3.43147	2.57405	0.643512	1.51808	1.28129	0.320322	0.0458	0.0675645
GT34	0.956559	1.8733	0.468326	0.260102	0.496195	0.124049	0.7595	0.797318
GT35	363.951	36.2267	9.05669	489.047	32.7067	8.17668	<.0001	1.8677e-05
GT39	58.8865	17.6719	4.41798	87.0205	25.7177	6.42942	0.0012	0.00276694
GT40	2.18839	3.95678	0.989195	0.740142	0.353344	0.088336	0.386	0.454437
GT41	19.5527	10.4067	2.60168	4.72326	4.13974	1.03494	<.0001	7.33378e-05
GT42	0.146206	0.385662	0.0964155	0.684342	2.29242	0.573106	0.0352	0.0536608
GT43	0	0	0	0.0494865	0.0914768	0.0228692	0.0015	0.00328015
GT44	6.57863	7.01572	1.75393	3.50672	1.61745	0.404362	0.6511	0.704071
GT45	29.8348	19.7836	4.9459	9.42931	2.80782	0.701955	<.0001	4.49291e-05
GT48	0.0124992	0.0231454	0.00578634	0.0368061	0.0977407	0.0244352	0.6246	0.691512
GT49	0	0	0	0.0934293	0.353694	0.0884234	0.0737	0.103909
GT50	4.59743	4.41307	1.10327	0.09672	0.127471	0.0318678	<.0001	2.11444e-05
GT51	563.544	98.8591	24.7148	623.161	67.4783	16.8696	0.1223	0.15579
GT52	0.143272	0.286149	0.0715374	0.00799025	0.0172784	0.00431961	0.3277	0.401032
GT53	0.0133927	0.0167012	0.00417531	0.0711357	0.0878181	0.0219545	0.0013	0.00296037
GT54	0.0931423	0.122428	0.0306071	0.0653053	0.131837	0.0329594	0.0765	0.106161
GT56	30.8457	21.8017	5.45042	12.6462	6.80061	1.70015	0.0005	0.00121295
GT57	6.76036	5.73315	1.43329	2.17398	2.5377	0.634425	0.0067	0.0126321
GT58	0.0339394	0.0733844	0.0183461	0.0331656	0.0610282	0.0152571	0.2347	0.291027
GT59	1.03819	0.918789	0.229697	0.0341969	0.0817705	0.0204426	<.0001	3.2035e-05
GT60	2.95361	5.36107	1.34027	4.33777	3.84562	0.961405	0.0075	0.0138618
GT61	44.3026	28.3747	7.09367	3.41247	1.94497	0.486242	<.0001	2.50438e-05
GT62	0.0121226	0.0431792	0.0107948	0.131979	0.406102	0.101526	0.1928	0.242319
GT63	0.743811	0.784861	0.196215	0.244082	0.496141	0.124035	0.001	0.00233952
GT64	0.942532	1.3239	0.330975	0.0604566	0.100509	0.0251273	0.0002	0.000563766
GT66	23.8267	11.2869	2.82173	13.798	5.06382	1.26596	0.0026	0.00530892
GT69	22.3423	15.2785	3.81962	0.17747	0.134427	0.0336067	<.0001	1.8677e-05
GT70	4.38463	5.09103	1.27276	2.27359	1.36049	0.340121	0.5465	0.612336
GT71	0.0961233	0.164243	0.0410608	0.0663007	0.0956154	0.0239039	0.9387	0.94887
GT72	0.438901	1.40417	0.351044	0.174921	0.449038	0.112259	0.9349	0.94887
GT73	7.21079	3.82423	0.956057	5.09342	2.42504	0.606259	0.1134	0.146522
GT74	0.207007	0.374093	0.0935233	0.903661	1.58478	0.396196	0.0235	0.0383136
GT75	6.96844	6.63589	1.65897	0.202429	0.344947	0.0862367	<.0001	4.56121e-05
GT76	13.1311	6.30119	1.5753	20.6476	6.19226	1.54806	0.0014	0.00300569
GT77	1.90847	1.86567	0.466417	1.13478	0.79525	0.198812	0.6785	0.72524
GT78	0.158597	0.205642	0.0514105	0.561645	0.366845	0.0917112	0.0007	0.00174397
GT80	0.1606	0.19219	0.0480474	1.00429	1.26689	0.316721	0.0096	0.0175009
GT81	20.0704	12.882	3.22051	19.9628	6.46677	1.61669	0.4287	0.492178
GT82	1.09365	3.82826	0.957065	1.00736	1.25786	0.314466	0.0141	0.0241705
GT83	194.637	38.8542	9.71354	161.063	26.7222	6.68055	0.0104	0.0185674
GT84	39.962	9.80916	2.45229	82.6317	26.4723	6.61808	<.0001	0.000125981
GT87	32.4299	16.1539	4.03847	11.0847	6.08337	1.52084	<.0001	6.47785e-05
GT89	6.74707	3.76955	0.942388	0.609771	1.22789	0.306972	<.0001	3.2035e-05
GT90	16.3337	9.73603	2.43401	6.29984	3.4808	0.870199	0.0003	0.000745035
GT92	120.416	83.8747	20.9687	5.44154	3.28769	0.821923	<.0001	1.8677e-05
GT94	60.1073	21.3865	5.34662	34.1147	13.2309	3.30772	0.0003	0.000745035
GT95	0	0	0	0.0260867	0.0636062	0.0159015	0.0737	0.103909
GT97	0.776417	0.863211	0.215803	1.47628	1.49387	0.373468	0.0348	0.0536608
GT99	2.97682	4.0604	1.0151	1.72777	1.59735	0.399339	0.8505	0.878879
GT100	33.7775	12.1554	3.03884	32.4746	10.0169	2.50424	0.763	0.797318
GT101	26.8215	17.7647	4.44116	21.1756	6.56565	1.64141	0.386	0.454437
GT102	4.49598	7.61947	1.90487	5.48754	4.33756	1.08439	0.0382	0.0572737
GT103	2.8763	4.12227	1.03057	3.74758	3.0221	0.755526	0.0973	0.129209
GT104	12.0885	6.73157	1.68289	1.78795	6.66855	1.66714	<.0001	7.96248e-05
GT105	19.4597	7.46236	1.86559	11.8669	7.34824	1.83706	0.0033	0.00664126
GT107	0.943933	1.21302	0.303254	1.54551	1.35258	0.338146	0.0899	0.122932
GT108	0.28238	0.263223	0.0658058	2.14697	0.715179	0.178795	<.0001	1.8677e-05
GT110	1.46656	3.28808	0.822021	0.210196	0.275739	0.0689348	0.0288	0.0462093
GT111	104.699	29.1364	7.28411	67.3939	28.4519	7.11299	0.0009	0.00222984
GT112	12.9959	7.9361	1.98403	1.63074	1.9566	0.489151	<.0001	3.2035e-05
GT113	39.8745	14.8535	3.71337	29.6765	6.32819	1.58205	0.0143	0.0241705
GT114	1.97665	3.03964	0.759909	0.861618	0.970343	0.242586	0.0973	0.129209

## Sheet: CBM
	Rumen			Cecum
Family	Mean	SD	SEM	Mean	SD	SEM	P value	FDR Adj PValue
CBM1	0.277209	0.543893	0.135973	0.0225106	0.0435624	0.0108906	0.0303	0.0470851
CBM2	96.2017	28.8175	7.20437	43.8859	18.0717	4.51792	<.0001	6.1645e-05
CBM3	42.0353	15.8548	3.9637	13.5176	20.4472	5.11179	<.0001	0.000108462
CBM4	302.466	99.3993	24.8498	182.671	60.6871	15.1718	0.0001	0.000250411
CBM5	13.6723	5.44689	1.36172	7.89923	2.28303	0.570758	0.0018	0.00340058
CBM6	566.582	136.289	34.0722	188.568	43.2336	10.8084	<.0001	1.0192e-05
CBM8	7.24207	5.29804	1.32451	1.75301	1.04319	0.260797	<.0001	0.000165523
CBM9	73.6506	16.0202	4.00504	212.292	49.147	12.2867	<.0001	1.0192e-05
CBM10	6.30467	7.09005	1.77251	0.375957	0.277458	0.0693644	0.0004	0.000883308
CBM11	6.81707	3.26307	0.815767	5.46743	2.91223	0.728057	0.2136	0.261732
CBM12	44.9291	17.8413	4.46034	65.8706	20.4843	5.12109	0.0042	0.00757364
CBM13	301.793	85.0132	21.2533	210.626	85.4763	21.3691	0.0033	0.0060806
CBM14	6.07179	6.69385	1.67346	0.932851	0.742335	0.185584	0.0004	0.000883308
CBM15	0.329934	0.525022	0.131255	0.518839	0.307338	0.0768344	0.0142	0.0234643
CBM16	74.3916	22.7435	5.68588	229.673	38.5025	9.62564	<.0001	1.0192e-05
CBM17	0.323674	0.402024	0.100506	0.320813	0.254584	0.0636459	0.4975	0.554924
CBM18	6.38278	6.46223	1.61556	0.719101	1.57056	0.392639	<.0001	7.03635e-05
CBM19	0.61399	0.868932	0.217233	0.197079	0.156641	0.0391603	0.0176	0.0283192
CBM20	408.701	89.5858	22.3965	89.6999	30.115	7.52874	<.0001	1.0192e-05
CBM21	3.54227	1.92699	0.481747	2.61205	2.16697	0.541742	0.0648	0.0894614
CBM22	130.016	41.8027	10.4507	163.699	86.1365	21.5341	0.1521	0.197493
CBM23	12.2814	4.3411	1.08527	9.17241	4.35282	1.0882	0.0348	0.0513278
CBM24	0.120689	0.0872021	0.0218005	1.08072	0.869387	0.217347	<.0001	4.12118e-05
CBM25	19.1778	8.59934	2.14983	43.6056	17.3597	4.33992	0.0005	0.000992862
CBM26	267.934	95.838	23.9595	360.272	145.307	36.3269	0.1051	0.142868
CBM27	3.33622	2.46263	0.615657	2.96563	1.35992	0.339981	0.6511	0.690776
CBM28	0.445022	0.291021	0.0727552	0.449379	0.671721	0.16793	0.1223	0.163676
CBM29	4.30972	5.16183	1.29046	0.636718	0.506771	0.126693	0.0075	0.0129675
CBM30	9.2341	3.18322	0.795806	7.79174	7.71071	1.92768	0.0317	0.0475387
CBM31	13.3159	7.27297	1.81824	12.9682	10.0166	2.50415	0.5465	0.601835
CBM32	682.74	142.677	35.6692	898.636	198.394	49.5986	0.0018	0.00340058
CBM34	90.6654	20.2766	5.06914	226.509	33.4191	8.35478	<.0001	1.0192e-05
CBM35	273.631	84.8976	21.2244	328.939	62.583	15.6458	0.0129	0.0219472
CBM35inCE17	16.8369	5.92738	1.48185	15.1196	7.25256	1.81314	0.2913	0.342466
CBM36	19.2196	6.26933	1.56733	7.01684	5.00553	1.25138	<.0001	4.54495e-05
CBM37	333.288	68.7664	17.1916	365.075	114.9	28.7251	0.7063	0.740292
CBM38	20.8412	9.0038	2.25095	9.37336	2.62363	0.655908	<.0001	8.05713e-05
CBM39	9.67641	6.83205	1.70801	6.35916	3.40468	0.851171	0.2136	0.261732
CBM40	82.5072	28.6096	7.15239	132.742	48.7464	12.1866	0.0005	0.00108865
CBM41	11.8456	4.986	1.2465	54.2996	30.567	7.64174	<.0001	1.0192e-05
CBM42	13.6085	10.5804	2.6451	1.36368	0.911704	0.227926	<.0001	1.0192e-05
CBM43	0.786633	0.974677	0.243669	1.00488	0.842921	0.21073	0.1867	0.235949
CBM44	2.59369	2.24447	0.561119	11.7553	10.807	2.70175	<.0001	4.54495e-05
CBM45	34.201	26.1544	6.53859	1.1333	2.76941	0.692353	<.0001	1.54716e-05
CBM46	24.2917	9.21003	2.30251	31.8841	9.69449	2.42362	0.0382	0.0553646
CBM47	6.52022	3.56377	0.890943	32.2282	23.4563	5.86408	<.0001	1.35636e-05
CBM48	755.174	164.402	41.1005	684.296	58.2837	14.5709	0.1871	0.235949
CBM49	2.94428	1.57674	0.394185	1.09639	0.789047	0.197262	0.0005	0.00108865
CBM50	953.486	167.413	41.8532	1014.14	83.0618	20.7655	0.386	0.441899
CBM51	32.986	9.76736	2.44184	78.9658	24.8338	6.20846	<.0001	1.35636e-05
CBM52	0.240441	0.242402	0.0606004	0.172683	0.16064	0.0401601	0.6238	0.670058
CBM53	0.393632	0.164626	0.0411566	1.20999	1.43795	0.359487	0.0458	0.064225
CBM54	18.0657	7.48932	1.87233	56.6863	15.7794	3.94484	<.0001	1.18682e-05
CBM55	0.277105	0.357973	0.0894933	0.348571	0.357693	0.0894233	0.2425	0.288995
CBM56	331.011	96.0726	24.0182	98.7452	14.9966	3.74916	<.0001	1.0192e-05
CBM57	44.2582	12.5965	3.14913	6.17798	1.87355	0.468388	<.0001	1.0192e-05
CBM58	10.7566	8.16857	2.04214	0.570955	0.483654	0.120913	<.0001	1.13583e-05
CBM59	6.70747	2.26633	0.566581	1.11385	0.844689	0.211172	<.0001	1.0192e-05
CBM60	1.75186	1.45662	0.364155	1.73665	1.14004	0.28501	0.5977	0.650049
CBM61	164.658	94.4619	23.6155	110.789	45.3589	11.3397	0.0458	0.064225
CBM62	115.063	26.6756	6.66891	47.8207	15.5032	3.8758	<.0001	1.33961e-05
CBM63	37.1396	23.5208	5.88021	3.89194	5.61831	1.40458	<.0001	2.01944e-05
CBM64	1.59489	1.82621	0.456553	0.481583	0.402867	0.100717	0.0047	0.0083511
CBM65	2.44516	1.50414	0.376034	5.36474	1.80877	0.452193	0.0001	0.000284307
CBM66	89.1238	18.5946	4.64865	126.312	20.27	5.06751	<.0001	0.000188393
CBM67	350.052	82.6954	20.6739	520.147	91.9771	22.9943	<.0001	0.000165523
CBM68	2.53014	2.25843	0.564606	3.96027	1.9558	0.488949	0.0143	0.0234643
CBM69	33.0397	13.1741	3.29352	35.8561	22.6234	5.65585	0.7919	0.820199
CBM70	4.6604	2.08621	0.521554	11.3025	3.94171	0.985428	<.0001	2.53763e-05
CBM71	0.322374	0.211681	0.0529203	3.58909	2.95894	0.739734	<.0001	1.0192e-05
CBM72	48.2986	15.5048	3.87621	2.60108	2.13073	0.532684	<.0001	1.0192e-05
CBM73	1.40673	0.937923	0.234481	1.89532	1.16392	0.29098	0.1416	0.186651
CBM74	14.3799	7.52643	1.88161	12.3473	5.18974	1.29744	0.451	0.509551
CBM75	1.33737	1.7244	0.431099	1.09181	1.2508	0.3127	0.9699	0.969936
CBM76	2.79233	2.35729	0.589323	1.79123	1.53206	0.383015	0.2278	0.275258
CBM77	37.9164	10.6397	2.65992	7.88944	6.62267	1.65567	<.0001	1.35636e-05
CBM78	20.7916	7.98592	1.99648	7.42509	2.48777	0.621942	<.0001	2.01944e-05
CBM79	27.6534	19.151	4.78774	2.97425	1.63328	0.408321	<.0001	2.21358e-05
CBM80	4.26097	3.08622	0.771555	4.93507	11.3132	2.82831	0.0262	0.0413998
CBM81	1.57431	0.93195	0.232987	2.08224	1.38602	0.346504	0.3089	0.358287
CBM82	0.736551	0.450645	0.112661	3.39551	1.83668	0.459171	<.0001	2.21358e-05
CBM83	3.07429	4.2731	1.06827	6.01356	2.09073	0.522681	0.0023	0.00428787
CBM84	38.439	19.6855	4.92139	34.2976	8.32955	2.08239	0.9399	0.96203
CBM85	13.2772	7.6459	1.91147	21.4234	38.2642	9.56605	0.9699	0.969936
CBM86	7.63441	2.7996	0.6999	15.1398	7.49837	1.87459	0.0008	0.00160974
CBM87	0.385342	0.271747	0.0679368	0.655062	0.340391	0.0850977	0.0317	0.0475387
CBM88	82.6327	24.1806	6.04515	17.0153	11.4013	2.85032	<.0001	1.18682e-05

## Sheet: PL
	Rumen			Cecum
Family	Mean	SD	SEM	Mean	SD	SEM	P value	FDR Adj PValue
PL1	294.01	82.4087	20.6022	82.3196	17.8584	4.46461	<.0001	4.48549e-06
PL2	0	0	0	6.77454	3.57048	0.89262	<.0001	4.48549e-06
PL3	48.305	50.8638	12.716	11.343	4.91739	1.22935	0.0458	0.052921
PL4	7.83001	4.77515	1.19379	0.704008	0.439023	0.109756	<.0001	4.48549e-06
PL5	0.0314819	0.0412624	0.0103156	0.117666	0.120905	0.0302263	0.0017	0.00303897
PL6	11.602	4.68172	1.17043	17.7204	9.77383	2.44346	0.0083	0.0118601
PL7	0.99449	0.700777	0.175194	2.06767	2.30851	0.577126	0.0382	0.0487156
PL8	9.10661	3.80318	0.950794	34.6386	14.9027	3.72566	<.0001	4.48549e-06
PL9	161.162	71.4147	17.8537	47.8272	8.88929	2.22232	<.0001	4.48549e-06
PL10	43.933	21.2025	5.30062	7.03984	4.25634	1.06408	<.0001	5.6972e-06
PL11	146.405	58.4522	14.6131	25.1371	10.4555	2.61387	<.0001	4.48549e-06
PL12	20.4875	8.61152	2.15288	70.0747	25.5717	6.39291	<.0001	5.6972e-06
PL13	0.0185442	0.0613093	0.0153273	0.0858669	0.27407	0.0685176	0.0439	0.0523651
PL14	10.4091	3.66676	0.91669	7.98638	6.6544	1.6636	0.0418	0.0515911
PL15	4.4575	2.33115	0.582787	21.4337	6.7724	1.6931	<.0001	4.48549e-06
PL16	0	0	0	0.0389655	0.0774834	0.0193708	0.0015	0.00280576
PL17	8.82779	4.22125	1.05531	38.1954	13.3684	3.34209	<.0001	4.48549e-06
PL18	0.697206	1.58558	0.396395	0.35123	0.345642	0.0864105	0.8802	0.880168
PL20	0.10935	0.124027	0.0310068	0.378639	0.36319	0.0907975	0.0059	0.00995271
PL21	2.21132	0.989319	0.24733	33.9378	23.7467	5.93667	<.0001	4.48549e-06
PL22	129.948	34.7363	8.68408	102.389	32.5147	8.12867	0.0215	0.0284154
PL25	0.843115	0.319754	0.0799385	2.56921	1.43297	0.358242	0.0003	0.00066796
PL26	15.7016	8.48676	2.12169	1.65176	0.822239	0.20556	<.0001	4.48549e-06
PL27	6.77919	3.44864	0.86216	8.97523	2.45211	0.613029	0.0075	0.0118601
PL29	18.0858	9.39402	2.34851	13.4532	17.5854	4.39636	0.0083	0.0118601
PL30	0.425414	0.415099	0.103775	1.17645	1.37182	0.342954	0.0083	0.0118601
PL31	24.4888	16.3283	4.08207	15.8506	7.95704	1.98926	0.3657	0.375871
PL33	44.8724	17.2547	4.31367	54.2482	10.0348	2.50871	0.0899	0.0978167
PL34	0.297665	0.167373	0.0418433	3.45012	1.5902	0.397551	<.0001	4.48549e-06
PL35	23.1032	7.98787	1.99697	173.808	146.58	36.645	<.0001	4.48549e-06
PL36	0.666572	0.517456	0.129364	1.20582	0.811991	0.202998	0.0159	0.0217359
PL37	2.08239	0.814977	0.203744	4.35388	1.80908	0.45227	<.0001	4.47229e-05
PL38	10.9953	6.3191	1.57977	7.24922	4.68385	1.17096	0.0595	0.0667174
PL39	0.696238	0.928757	0.232189	21.879	17.031	4.25776	<.0001	4.48549e-06
PL40	1.37554	0.916307	0.229077	15.3758	6.27504	1.56876	<.0001	4.48549e-06
PL41	3.45744	4.94187	1.23547	3.6924	2.55998	0.639995	0.1223	0.129275
PL42	3.96238	2.39268	0.59817	7.56391	2.56793	0.641983	0.0002	0.00045464

## Sheet: CE
	Rumen			Cecum
Family	Mean	SD	SEM	Mean	SD	SEM	P value	FDR Adj PValue
CE1	3199.09	570.556	142.639	2071.66	109.538	27.3845	<.0001	2.46324e-05
CE2	291.736	47.9561	11.989	311.581	45.0069	11.2517	0.2913	0.291293
CE3	453.629	70.9891	17.7473	797.033	72.0496	18.0124	<.0001	3.81873e-06
CE4	622.727	100.61	25.1526	1247.9	131.531	32.8828	<.0001	3.81873e-06
CE5	21.0606	6.56671	1.64168	7.48504	5.51249	1.37812	<.0001	4.69789e-05
CE6	412.685	78.8504	19.7126	237.077	26.6635	6.66588	<.0001	3.81873e-06
CE7	250.725	45.9929	11.4982	283.757	28.897	7.22426	0.0093	0.0119672
CE8	296.604	67.2609	16.8152	53.5357	8.36647	2.09162	<.0001	3.81873e-06
CE9	74.8985	16.7518	4.18796	408.548	34.3828	8.59569	<.0001	3.81873e-06
CE11	140.798	27.6389	6.90973	84.5922	31.9675	7.99188	0.0002	0.000235331
CE12	355.508	75.8436	18.9609	216.795	31.4902	7.87254	<.0001	3.12277e-05
CE13	49.9185	8.7188	2.1797	11.677	5.63392	1.40848	<.0001	3.81873e-06
CE14	209.249	33.6156	8.40389	234.854	24.4087	6.10218	0.0704	0.0792455
CE15	130.824	30.8166	7.70415	110.474	23.977	5.99426	0.0765	0.0809975
CE16	0.0942786	0.115327	0.0288316	0.158597	0.132036	0.0330089	0.0348	0.0417502
CE17	58.9878	15.2599	3.81497	151.667	37.8775	9.46938	<.0001	3.81873e-06
CE18	0.0555682	0.0671575	0.0167894	0.00461694	0.0154922	0.00387306	0.0002	0.000235331
CE19	419.504	71.4542	17.8636	202.234	32.1961	8.04902	<.0001	3.81873e-06

## Sheet: AA
	Rumen			Cecum
Family	Mean	SD	SEM	Mean	SD	SEM	P value	FDR Adj PValue
AA1	0.304939	0.12765	0.0319124	1.89329	1.92778	0.481944	<.0001	1.44999e-05
AA2	0.195498	0.0617472	0.0154368	1.6493	1.14195	0.285487	<.0001	7.96616e-06
AA3	33.2132	12.2492	3.06229	34.0437	12.6669	3.16672	0.7063	0.750397
AA4	18.8318	5.79398	1.4485	64.6206	18.8995	4.72487	<.0001	7.96616e-06
AA5	0.298582	0.460704	0.115176	0	0	0	<.0001	2.22721e-05
AA6	875.825	133.752	33.438	429.926	41.1219	10.2805	<.0001	7.96616e-06
AA7	16.888	8.37621	2.09405	24.3762	8.95383	2.23846	0.0176	0.023017
AA8	0.00837894	0.0335157	0.00837894	0.739026	1.47161	0.367901	0.0001	0.000258536
AA9	0.0573114	0.0739097	0.0184774	0.196633	0.215158	0.0537895	0.0176	0.023017
AA10	0.572877	1.01134	0.252834	0.539168	0.364367	0.0910917	0.2	0.226718
AA11	2.9909	2.83665	0.709162	0.0780289	0.198757	0.0496894	<.0001	1.46397e-05
AA12	0.428806	0.159048	0.039762	1.79691	1.53559	0.383898	<.0001	1.48299e-05
AA13	1.71179	3.52391	0.880978	0.420119	0.715143	0.178786	0.0415	0.0503392
AA14	0	0	0	0.097848	0.165835	0.0414587	0.0002	0.000414302
AA15	5.49444	4.16822	1.04205	0.20589	0.202441	0.0506103	<.0001	8.6778e-06
AA16	1.23104	0.861292	0.215323	0.91877	1.87784	0.469459	0.0067	0.0102859
AA17	0.411911	0.802569	0.200642	0.112342	0.128123	0.0320306	0.9398	0.939804
