# Supplementary material for: Reductive acetogenesis is a dominant process in the ruminant hindgut
Source: Research Square preprint supplement (doi:10.21203/rs.3.rs-4473149/v1), 2024-06-10
Supplement: Supplementary file 5 [file 4daaea6abc0ba93016f99e41.xlsx]

## Sheet: MAGs of acetogen
Number	Rename	Genome (MAG)	Phylum	Class	order	family	Genus	species	TPM in rumen	TPM in cecum
1	Genome1	Acetobacterium_fimetarium	p__Firmicutes_A	c__Clostridia	o__Eubacteriales	f__Eubacteriaceae	g__Acetobacterium	s__Acetobacterium fimetarium	1397.35	4581.89
2	Genome2	Blautia_coccoides	p__Firmicutes_A	c__Clostridia	o__Lachnospirales	f__Lachnospiraceae	g__Blautia	s__Blautia coccoides	4283.02	8680.82
3	Genome3	Blautia_hydrogenotrophica	p__Firmicutes_A	c__Clostridia	o__Lachnospirales	f__Lachnospiraceae	g__Blautia_A	s__Blautia_A hydrogenotrophica	16142.2	38620.3
4	Genome4	Blautia_producta	p__Firmicutes_A	c__Clostridia	o__Lachnospirales	f__Lachnospiraceae	g__Blautia	s__Blautia coccoides	3124.71	5801.32
5	Genome5	Blautia_schinkii	p__Firmicutes_A	c__Clostridia	o__Lachnospirales	f__Lachnospiraceae	g__Blautia_A	s__Blautia_A schinkii	12225.5	25303.6
6	MAG205	Ce9.443	p__Firmicutes_A	c__Clostridia	Oscillospirales	f__Oscillospiraceae	g__SIG483	s__SIG483 sp015068035	8713.36	211533
7	MAG698	Ce23.479	p__Firmicutes_A	c__Clostridia	Lachnospirales	f__Lachnospiraceae	g__HGM12587	s__	17313.4	429600
8	Genome6	Clostridium_difficile	p__Firmicutes_A	c__Clostridia	o__Peptostreptococcales	f__Peptostreptococcaceae	g__Clostridioides	s__Clostridioides difficile	1667.64	8045.25
9	Genome7	Clostridium_ljungdahlii	p__Firmicutes_A	c__Clostridia	o__Clostridiales	f__Clostridiaceae	g__Clostridium_B	s__Clostridium_B ljungdahlii	3307.97	4835.33
10	Genome8	Eubacterium_limosum	p__Firmicutes_A	c__Clostridia	o__Eubacteriales	f__Eubacteriaceae	g__Eubacterium	s__Eubacterium limosum	1248.58	3270.19
11	Genome9	Eubacterium_maltosivorans	p__Firmicutes_A	c__Clostridia	o__Eubacteriales	f__Eubacteriaceae	g__Eubacterium	s__Eubacterium maltosivorans	88199.4	117940
12	Genome10	Marvinbryantia_formatexigens	p__Firmicutes_A	c__Clostridia	o__Lachnospirales	f__Lachnospiraceae	g__Marvinbryantia	s__Marvinbryantia formatexigens	8043.88	10172.4
13	Genome11	Moorella_thermoacetica	p__Firmicutes_B	c__Moorellia	o__Moorellales	f__Moorellaceae	g__Moorella	s__Moorella thermoacetica	1921.1	4178.6
14	Genome12	Oxobacter_pfennigii	p__Firmicutes_A	c__Clostridia	o__Clostridiales	f__Oxobacteraceae	g__Oxobacter	s__Oxobacter pfennigii	3470.09	6311.43
15	MAG1625	R14.394	p__Firmicutes_A	c__Clostridia	Lachnospirales	f__Lachnospiraceae	g__SIG280	s__	121526	2640.99
16	MAG1631	R14.406	p__Firmicutes_A	c__Clostridia	Oscillospirales	f__Oscillospiraceae	g__RGIG7114	s__	98315	17519.1
17	MAG1976	R25.376	p__Firmicutes_A	c__Clostridia	Lachnospirales	f__Lachnospiraceae	g__SIG280	s__	75765.1	2172.67
18	MAG1979	R25.393	p__Firmicutes_A	c__Clostridia	Oscillospirales	f__Oscillospiraceae	g__RGIG7114	s__	146826	21498
19	MAG2033	R26.289	p__Firmicutes_A	c__Clostridia	Oscillospirales	f__Oscillospiraceae	g__RGIG7114	s__	162888	27783.9
20	MAG2125	R27.379	p__Firmicutes_A	c__Clostridia	Lachnospirales	f__Lachnospiraceae	g__RGIG5612	s__	70154.9	30557.6
21	MAG2293	R29.336	p__Firmicutes_A	c__Clostridia	Lachnospirales	f__Lachnospiraceae	g__SIG280	s__	143924	4222.67
22	Genome13	Sporomusa_termitida	p__Firmicutes_C	c__Negativicutes	o__Sporomusales	f__Sporomusaceae	g__Sporomusa	s__Sporomusa termitida	4179.43	2640.59
23	Genome14	Terrisporobacter_mayombei	p__Firmicutes_A	c__Clostridia	o__Peptostreptococcales	f__Peptostreptococcaceae	g__Terrisporobacter	s__	2666.31	11754.8
24	Genome15	Treponema_primitia	p__Spirochaetota	c__Spirochaetia	o__Treponematales	f__Termitinemataceae	g__Termitinema	s__Termitinema primitia	2698.17	335.37

## Sheet: acsB genes in MAGs
Number	Query_id	MAGs
1	WP_186841358.1	Genome1
2	WP_186841456.1	Genome1
3	fig|6666666.938377.peg.3421	Genome2
4	WP_055165407.1	Genome3
5	WP_055164828.1	Genome3
6	WP_040350265.1	Genome3
7	WP_022270073.1	Genome4
8	WP_118578440.1	Genome5
9	WP_173715526.1	Genome5
10	WP_003418359.1	Genome6
11	WP_013240359.1	Genome7
12	WP_038352888.1	Genome8
13	WP_058695441.1	Genome9
14	WP_040782576.1	Genome10
15	WP_053094769.1	Genome11
16	WP_054875698.1	Genome12
17	WP_054875435.1	Genome12
18	WP_144349623.1	Genome13
19	WP_144348915.1	Genome13
20	MCC3669903.1	Genome14
21	WP_015707189.1	Genome15
22	Ce23__97040_12	MAG698
23	Ce9__577031_10	MAG205
24	Ce9__706470_59	MAG205
25	R14__31068_18	MAG1625
26	R14__31068_19	MAG1625
27	R14__143886_34	MAG1631
28	R25__327460_12	MAG1976
29	R25__327460_13	MAG1976
30	R25__35900_3	MAG1979
31	R25__35900_31	MAG1979
32	R26__95748_31	MAG2033
33	R26__295036_3	MAG2033
34	R27__229439_64	MAG2125
35	R29__681943_121	MAG2293
36	R29__681943_122	MAG2293

## Sheet: WL pathway
Rename	Fdh	Fhs	Fch	Fol	Met	MT	ACS/CODH	Pta	Ack	Electron bifurcating hydrogenase	Nfn transhydrogenase	F1/F0-ATP synthase	Rnf complex	Ech complex
MAG698	Absent	Prenest	Prenest	Prenest	Prenest	Prenest	Prenest	Absent	Absent	Prenest	Prenest	Prenest	Prenest	Prenest
MAG205	Absent	Prenest	Prenest	Prenest	Prenest	Prenest	Prenest	Prenest	Prenest	Prenest	Prenest	Absent	Prenest	Absent
MAG1625	Absent	Prenest	Prenest	Prenest	Prenest	Prenest	Prenest	Prenest	Prenest	Prenest	Prenest	Prenest	Prenest	Absent
MAG1631	Absent	Prenest	Prenest	Prenest	Prenest	Prenest	Prenest	Prenest	Prenest	Prenest	Prenest	Prenest	Prenest	Absent
MAG1976	Absent	Prenest	Prenest	Prenest	Prenest	Prenest	Prenest	Prenest	Prenest	Prenest	Prenest	Prenest	Prenest	Absent
MAG1979	Absent	Prenest	Prenest	Prenest	Prenest	Prenest	Prenest	Prenest	Prenest	Prenest	Prenest	Prenest	Prenest	Absent
MAG2033	Absent	Prenest	Prenest	Prenest	Prenest	Prenest	Prenest	Prenest	Prenest	Prenest	Prenest	Prenest	Prenest	Absent
MAG2125	Present	Prenest	Prenest	Prenest	Prenest	Prenest	Prenest	Prenest	Prenest	Prenest	Prenest	Prenest	Prenest	Absent
MAG2293	Absent	Prenest	Prenest	Prenest	Prenest	Prenest	Prenest	Prenest	Prenest	Prenest	Prenest	Prenest	Prenest	Absent
