# Supplementary material for: Reductive acetogenesis is a dominant process in the ruminant hindgut
Source: Research Square preprint supplement (doi:10.21203/rs.3.rs-4473149/v1), 2024-06-10
Supplement: Supplementary file 6 [file 7af8fd7cd715d83b48a66519.xlsx]

## Sheet: enzyme results
	Rumen			Cecum
Enzymes	Mean	SD	SEM	Mean	SD	SEM	P value	FDR Adj PValue	FC	Group	log2(FC)
Xylosidase	9945.71	1728.8	432.2	6987.61	838.601	209.65	<.0001	2.77771e-05	1.42334	Rumen	0.509277
Acetylgalatosaminidase	4007.41	713.482	178.371	5717.06	509.288	127.322	<.0001	3.94956e-06	1.42662	Cecum	0.512603
Fermentative	61.699	15.0521	3.76301	215.263	30.5949	7.64872	<.0001	2.49919e-06	3.48893	Cecum	1.80278
Sensory	18.1447	4.12793	1.03198	98.334	25.9115	6.47786	<.0001	2.49919e-06	5.41943	Cecum	2.43814
Respiratory	4.1282	2.51024	0.627561	1.83195	1.96529	0.491322	0.0005	0.000456488	2.25345	Rumen	1.17213
Bifurcating	114.686	22.2623	5.56557	198.649	31.0332	7.7583	<.0001	3.27398e-06	1.73211	Cecum	0.792533
AcsB	10.6765	3.1237	0.780926	131.434	31.4627	7.86568	<.0001	3.51448e-06	12.3106	Cecum	3.62183
aprA	6.95619	5.41428	1.35357	0.944764	0.471054	0.117764	<.0001	3.51448e-06	7.36289	Rumen	2.88027
FrdA	166.843	32.9503	8.23757	81.8736	28.6063	7.15157	<.0001	8.51104e-06	2.03782	Rumen	1.02702
NrfA	69.1917	23.5891	5.89728	1.34654	2.01703	0.504257	<.0001	3.51448e-06	51.3849	Rumen	5.68327

## Sheet: microorganisms results
	R			Ce
Genome	Mean	SD	SEM	Mean	SD	SEM	P value	FDR Adj PValue	FC	Group	log2(FC)
Prevotella sp.	193410	62135.3	15533.8	155.246	591.989	147.997	<.0001	1.24883e-06	1245.83	Rumen	10.2829
Ruminococcus sp.	21370.1	6468.35	1617.09	10373.3	5407.2	1351.8	0.0001	0.000128973	2.0601	Rumen	1.04271
Butyrivibrio sp.	7561.8	3561.98	890.496	47.3372	98.8284	24.7071	<.0001	1.9333e-06	159.743	Rumen	7.31961
Akkermansia sp.	0	0	0	35177.3	37857.6	9464.4	<.0001	8.06493e-07	351773	Cecum	18.4243
Alistipes sp.	0	0	0	34359.8	31350	7837.51	<.0001	8.06493e-07	343598	Cecum	18.3904
Faecousia sp.	0	0	0	62915	20602.1	5150.52	<.0001	8.06493e-07	629150	Cecum	19.263
CAG-488 sp.	0	0	0	6097.24	7990.54	1997.64	<.0001	8.06493e-07	60972.4	Cecum	15.8959
Succiniclasticum sp.	1510.99	738.369	184.592	162.575	352.761	88.1903	<.0001	3.94956e-06	9.29415	Rumen	3.21632
Desulfovibrio sp.	182.348	235.244	58.8109	0	0	0	<.0001	3.99344e-06	1823.48	Rumen	10.8325
HGM12587 sp.	0	0	0	2779.2	5338.48	1334.62	<.0001	8.06493e-07	27792	Cecum	14.7624
