# Supplementary material for: Reductive acetogenesis is a dominant process in the ruminant hindgut
Source: Research Square preprint supplement (doi:10.21203/rs.3.rs-4473149/v1), 2024-06-10
Supplement: Supplementary file 7 [file 7bae34f855fdaed53abb8e6a.xlsx]

## Sheet: KEGG annotion
gene_id	Pathway	Description
ENSCHIG00000005900	K00002	AKR1A1, adh; alcohol dehydrogenase (NADP+) [EC:1.1.1.2]
ENSCHIG00000020256	K00006	GPD1; glycerol-3-phosphate dehydrogenase (NAD+) [EC:1.1.1.8]
ENSCHIG00000012061	K00011	AKR1B; aldehyde reductase [EC:1.1.1.21]
ENSCHIG00000024923	K00012	UGDH, ugd; UDPglucose 6-dehydrogenase [EC:1.1.1.22]
ENSCHIG00000010543	K00016	LDH, ldh; L-lactate dehydrogenase [EC:1.1.1.27]
ENSCHIG00000011773	K00016	LDH, ldh; L-lactate dehydrogenase [EC:1.1.1.27]
ENSCHIG00000013476	K00016	LDH, ldh; L-lactate dehydrogenase [EC:1.1.1.27]
ENSCHIG00000018372	K00016	LDH, ldh; L-lactate dehydrogenase [EC:1.1.1.27]
ENSCHIG00000026370	K00019	E1.1.1.30, bdh; 3-hydroxybutyrate dehydrogenase [EC:1.1.1.30]
ENSCHIG00000011333	K00020	mmsB, HIBADH; 3-hydroxyisobutyrate dehydrogenase [EC:1.1.1.31]
ENSCHIG00000015556	K00021	HMGCR; hydroxymethylglutaryl-CoA reductase (NADPH) [EC:1.1.1.34]
ENSCHIG00000013637	K00022	HADH; 3-hydroxyacyl-CoA dehydrogenase [EC:1.1.1.35]
ENSCHIG00000015525	K00025	MDH1; malate dehydrogenase [EC:1.1.1.37]
ENSCHIG00000001144	K00029	E1.1.1.40, maeB; malate dehydrogenase (oxaloacetate-decarboxylating)(NADP+) [EC:1.1.1.40]
ENSCHIG00000022836	K00029	E1.1.1.40, maeB; malate dehydrogenase (oxaloacetate-decarboxylating)(NADP+) [EC:1.1.1.40]
ENSCHIG00000011555	K00030	IDH3; isocitrate dehydrogenase (NAD+) [EC:1.1.1.41]
ENSCHIG00000014252	K00030	IDH3; isocitrate dehydrogenase (NAD+) [EC:1.1.1.41]
ENSCHIG00000003808	K00031	IDH1, IDH2, icd; isocitrate dehydrogenase [EC:1.1.1.42]
ENSCHIG00000018336	K00031	IDH1, IDH2, icd; isocitrate dehydrogenase [EC:1.1.1.42]
ENSCHIG00000024608	K00044	HSD17B1; 17beta-estradiol 17-dehydrogenase [EC:1.1.1.62]
ENSCHIG00000019637	K00049	GRHPR; glyoxylate/hydroxypyruvate reductase [EC:1.1.1.79 1.1.1.81]
ENSCHIG00000014412	K00061	RDH5; 11-cis-retinol dehydrogenase [EC:1.1.1.315]
ENSCHIG00000027101	K00067	rfbD, rmlD; dTDP-4-dehydrorhamnose reductase [EC:1.1.1.133]
ENSCHIG00000004358	K00071	HSD11B2; corticosteroid 11-beta-dehydrogenase isozyme 2 [EC:1.1.1.-]
ENSCHIG00000024080	K00072	SPR; sepiapterin reductase [EC:1.1.1.153]
ENSCHIG00000004827	K00079	CBR1; carbonyl reductase 1 [EC:1.1.1.184 1.1.1.189 1.1.1.197]
ENSCHIG00000007290	K00079	CBR1; carbonyl reductase 1 [EC:1.1.1.184 1.1.1.189 1.1.1.197]
ENSCHIG00000011667	K00079	CBR1; carbonyl reductase 1 [EC:1.1.1.184 1.1.1.189 1.1.1.197]
ENSCHIG00000023379	K00081	CBR2; carbonyl reductase 2 [EC:1.1.1.184]
ENSCHIG00000021573	K00084	CBR3; carbonyl reductase 3 [EC:1.1.1.184]
ENSCHIG00000017941	K00088	IMPDH, guaB; IMP dehydrogenase [EC:1.1.1.205]
ENSCHIG00000012303	K00102	LDHD, dld; D-lactate dehydrogenase (cytochrome) [EC:1.1.2.4]
ENSCHIG00000017276	K00106	XDH; xanthine dehydrogenase/oxidase [EC:1.17.1.4 1.17.3.2]
ENSCHIG00000010045	K00108	betA, CHDH; choline dehydrogenase [EC:1.1.99.1]
ENSCHIG00000025518	K00121	frmA, ADH5, adhC; S-(hydroxymethyl)glutathione dehydrogenase / alcohol dehydrogenase [EC:1.1.1.284 1.1.1.1]
ENSCHIG00000020729	K00128	ALDH; aldehyde dehydrogenase (NAD+) [EC:1.2.1.3]
ENSCHIG00000023248	K00128	ALDH; aldehyde dehydrogenase (NAD+) [EC:1.2.1.3]
ENSCHIG00000027223	K00128	ALDH; aldehyde dehydrogenase (NAD+) [EC:1.2.1.3]
ENSCHIG00000026059	K00129	E1.2.1.5; aldehyde dehydrogenase (NAD(P)+) [EC:1.2.1.5]
ENSCHIG00000020541	K00139	ALDH5A1; succinate-semialdehyde dehydrogenase [EC:1.2.1.24]
ENSCHIG00000011927	K00140	mmsA, iolA, ALDH6A1; malonate-semialdehyde dehydrogenase (acetylating) / methylmalonate-semialdehyde dehydrogenase [EC:1.2.1.18 1.2.1.27]
ENSCHIG00000022349	K00142	AASDH; acyl-CoA synthetase [EC:6.2.1.-]
ENSCHIG00000021660	K00149	ALDH9A1; aldehyde dehydrogenase family 9 member A1 [EC:1.2.1.47 1.2.1.3]
ENSCHIG00000013439	K00157	AOX; aldehyde oxidase [EC:1.2.3.1]
ENSCHIG00000013677	K00157	AOX; aldehyde oxidase [EC:1.2.3.1]
ENSCHIG00000020570	K00157	AOX; aldehyde oxidase [EC:1.2.3.1]
ENSCHIG00000012102	K00162	PDHB, pdhB; pyruvate dehydrogenase E1 component beta subunit [EC:1.2.4.1]
ENSCHIG00000006876	K00164	OGDH, sucA; 2-oxoglutarate dehydrogenase E1 component [EC:1.2.4.2]
ENSCHIG00000025690	K00166	BCKDHA, bkdA1; 2-oxoisovalerate dehydrogenase E1 component alpha subunit [EC:1.2.4.4]
ENSCHIG00000006319	K00167	BCKDHB, bkdA2; 2-oxoisovalerate dehydrogenase E1 component beta subunit [EC:1.2.4.4]
ENSCHIG00000009091	K00182	WNT2; wingless-type MMTV integration site family, member 2
ENSCHIG00000014907	K00213	DHCR7; 7-dehydrocholesterol reductase [EC:1.3.1.21]
ENSCHIG00000019345	K00214	BLVRA, bvdR; biliverdin reductase [EC:1.3.1.24]
ENSCHIG00000008956	K00222	TM7SF2, ERG24; Delta14-sterol reductase [EC:1.3.1.70]
ENSCHIG00000019184	K00228	CPOX, hemF; coproporphyrinogen III oxidase [EC:1.3.3.3]
ENSCHIG00000008041	K00231	PPOX, hemY; protoporphyrinogen/coproporphyrinogen III oxidase [EC:1.3.3.4 1.3.3.15]
ENSCHIG00000015179	K00232	E1.3.3.6, ACOX1, ACOX3; acyl-CoA oxidase [EC:1.3.3.6]
ENSCHIG00000021549	K00232	E1.3.3.6, ACOX1, ACOX3; acyl-CoA oxidase [EC:1.3.3.6]
ENSCHIG00000013325	K00235	SDHB, SDH2; succinate dehydrogenase (ubiquinone) iron-sulfur subunit [EC:1.3.5.1]
ENSCHIG00000008988	K00236	SDHC, SDH3; succinate dehydrogenase (ubiquinone) cytochrome b560 subunit
ENSCHIG00000012727	K00248	ACADS, bcd; butyryl-CoA dehydrogenase [EC:1.3.8.1]
ENSCHIG00000013780	K00249	ACADM, acd; acyl-CoA dehydrogenase [EC:1.3.8.7]
ENSCHIG00000025030	K00251	AKR1D1; 3-oxo-5-beta-steroid 4-dehydrogenase [EC:1.3.1.3]
ENSCHIG00000008032	K00252	GCDH, gcdH; glutaryl-CoA dehydrogenase [EC:1.3.8.6]
ENSCHIG00000025464	K00253	IVD, ivd; isovaleryl-CoA dehydrogenase [EC:1.3.8.4]
ENSCHIG00000012492	K00255	ACADL; long-chain-acyl-CoA dehydrogenase [EC:1.3.8.8]
ENSCHIG00000001947	K00272	DDO; D-aspartate oxidase [EC:1.4.3.1]
ENSCHIG00000012760	K00273	DAO, aao; D-amino-acid oxidase [EC:1.4.3.3]
ENSCHIG00000004606	K00275	pdxH, PNPO; pyridoxamine 5'-phosphate oxidase [EC:1.4.3.5]
ENSCHIG00000006644	K00276	AOC3, AOC2, tynA; primary-amine oxidase [EC:1.4.3.21]
ENSCHIG00000013407	K00276	AOC3, AOC2, tynA; primary-amine oxidase [EC:1.4.3.21]
ENSCHIG00000017030	K00277	LOX; protein-lysine 6-oxidase [EC:1.4.3.13]
ENSCHIG00000023220	K00280	LOXL2_3_4; lysyl oxidase-like protein 2/3/4 [EC:1.4.3.-]
ENSCHIG00000016160	K00287	DHFR, folA; dihydrofolate reductase [EC:1.5.1.3]
ENSCHIG00000001482	K00288	MTHFD; methylenetetrahydrofolate dehydrogenase (NADP+) / methenyltetrahydrofolate cyclohydrolase / formyltetrahydrofolate synthetase [EC:1.5.1.5 3.5.4.9 6.3.4.3]
ENSCHIG00000016155	K00294	E1.2.1.88; 1-pyrroline-5-carboxylate dehydrogenase [EC:1.2.1.88]
ENSCHIG00000025785	K00297	metF, MTHFR; methylenetetrahydrofolate reductase (NADPH) [EC:1.5.1.20]
ENSCHIG00000011546	K00306	PIPOX; sarcosine oxidase / L-pipecolate oxidase [EC:1.5.3.1 1.5.3.7]
ENSCHIG00000016140	K00308	PAOX; N1-acetylpolyamine oxidase [EC:1.5.3.13]
ENSCHIG00000023050	K00311	ETFDH; electron-transferring-flavoprotein dehydrogenase [EC:1.5.5.1]
ENSCHIG00000016159	K00312	WNT3; wingless-type MMTV integration site family, member 3
ENSCHIG00000021958	K00323	NNT; H+-translocating NAD(P) transhydrogenase [EC:1.6.1.2 7.1.1.1]
ENSCHIG00000009613	K00326	E1.6.2.2; cytochrome-b5 reductase [EC:1.6.2.2]
ENSCHIG00000014622	K00326	E1.6.2.2; cytochrome-b5 reductase [EC:1.6.2.2]
ENSCHIG00000026877	K00326	E1.6.2.2; cytochrome-b5 reductase [EC:1.6.2.2]
ENSCHIG00000014957	K00344	qor, CRYZ; NADPH:quinone reductase [EC:1.6.5.5]
ENSCHIG00000017286	K00344	qor, CRYZ; NADPH:quinone reductase [EC:1.6.5.5]
ENSCHIG00000025722	K00355	NQO1; NAD(P)H dehydrogenase (quinone) [EC:1.6.5.2]
ENSCHIG00000010473	K00357	QDPR; dihydropteridine reductase [EC:1.5.1.34]
ENSCHIG00000010901	K00364	E1.7.1.7, guaC; GMP reductase [EC:1.7.1.7]
ENSCHIG00000024167	K00364	E1.7.1.7, guaC; GMP reductase [EC:1.7.1.7]
ENSCHIG00000024053	K00382	DLD, lpd, pdhD; dihydrolipoamide dehydrogenase [EC:1.8.1.4]
ENSCHIG00000016848	K00383	GSR, gor; glutathione reductase (NADPH) [EC:1.8.1.7]
ENSCHIG00000006773	K00387	SUOX; sulfite oxidase [EC:1.8.3.1]
ENSCHIG00000026576	K00408	WNT4; wingless-type MMTV integration site family, member 4
ENSCHIG00000015275	K00411	UQCRFS1, RIP1, petA; ubiquinol-cytochrome c reductase iron-sulfur subunit [EC:7.1.1.8]
ENSCHIG00000000035	K00412	CYTB, petB; ubiquinol-cytochrome c reductase cytochrome b subunit
ENSCHIG00000017517	K00413	CYC1, CYT1, petC; ubiquinol-cytochrome c reductase cytochrome c1 subunit
ENSCHIG00000015164	K00414	QCR1, UQCRC1; ubiquinol-cytochrome c reductase core subunit 1
ENSCHIG00000016680	K00415	QCR2, UQCRC2; ubiquinol-cytochrome c reductase core subunit 2
ENSCHIG00000013936	K00416	QCR6, UQCRH; ubiquinol-cytochrome c reductase subunit 6
ENSCHIG00000013644	K00417	QCR7, UQCRB; ubiquinol-cytochrome c reductase subunit 7
ENSCHIG00000008372	K00420	QCR10, UQCR; ubiquinol-cytochrome c reductase subunit 10
ENSCHIG00000017366	K00432	gpx, btuE, bsaA; glutathione peroxidase [EC:1.11.1.9]
ENSCHIG00000017983	K00432	gpx, btuE, bsaA; glutathione peroxidase [EC:1.11.1.9]
ENSCHIG00000022658	K00432	gpx, btuE, bsaA; glutathione peroxidase [EC:1.11.1.9]
ENSCHIG00000014378	K00444	WNT5; wingless-type MMTV integration site family, member 5
ENSCHIG00000016131	K00444	WNT5; wingless-type MMTV integration site family, member 5
ENSCHIG00000023410	K00445	WNT6; wingless-type MMTV integration site family, member 6
ENSCHIG00000021041	K00456	CDO1; cysteine dioxygenase [EC:1.13.11.20]
ENSCHIG00000025642	K00460	ALOX15; arachidonate 15-lipoxygenase [EC:1.13.11.33]
ENSCHIG00000023024	K00461	ALOX5; arachidonate 5-lipoxygenase [EC:1.13.11.34]
ENSCHIG00000019906	K00463	IDO, INDO; indoleamine 2,3-dioxygenase [EC:1.13.11.52]
ENSCHIG00000025203	K00463	IDO, INDO; indoleamine 2,3-dioxygenase [EC:1.13.11.52]
ENSCHIG00000013957	K00472	P4HA; prolyl 4-hydroxylase [EC:1.14.11.2]
ENSCHIG00000021007	K00472	P4HA; prolyl 4-hydroxylase [EC:1.14.11.2]
ENSCHIG00000021364	K00472	P4HA; prolyl 4-hydroxylase [EC:1.14.11.2]
ENSCHIG00000025580	K00473	PLOD1; procollagen-lysine,2-oxoglutarate 5-dioxygenase 1 [EC:1.14.11.4]
ENSCHIG00000027073	K00476	ASPH; aspartate beta-hydroxylase [EC:1.14.11.16]
ENSCHIG00000022569	K00477	PHYH; phytanoyl-CoA hydroxylase [EC:1.14.11.18]
ENSCHIG00000025025	K00477	PHYH; phytanoyl-CoA hydroxylase [EC:1.14.11.18]
ENSCHIG00000024758	K00478	HR; [histone H3]-dimethyl-L-lysine9 demethylase [EC:1.14.11.65]
ENSCHIG00000014242	K00485	FMO; dimethylaniline monooxygenase (N-oxide forming) [EC:1.14.13.8]
ENSCHIG00000024460	K00485	FMO; dimethylaniline monooxygenase (N-oxide forming) [EC:1.14.13.8]
ENSCHIG00000025011	K00488	CYP27A1; cholestanetriol 26-monooxygenase [EC:1.14.15.15]
ENSCHIG00000026162	K00501	TH; tyrosine 3-monooxygenase [EC:1.14.16.2]
ENSCHIG00000002616	K00502	TPH1_2; tryptophan 5-monooxygenase [EC:1.14.16.4]
ENSCHIG00000022168	K00502	TPH1_2; tryptophan 5-monooxygenase [EC:1.14.16.4]
ENSCHIG00000019193	K00503	DBH; dopamine beta-monooxygenase [EC:1.14.17.1]
ENSCHIG00000018012	K00507	SCD, desC; stearoyl-CoA desaturase (Delta-9 desaturase) [EC:1.14.19.1]
ENSCHIG00000021254	K00507	SCD, desC; stearoyl-CoA desaturase (Delta-9 desaturase) [EC:1.14.19.1]
ENSCHIG00000000527	K00509	PTGS1, COX1; prostaglandin-endoperoxide synthase 1 [EC:1.14.99.1]
ENSCHIG00000010531	K00513	CYP21A; steroid 21-monooxygenase [EC:1.14.14.16]
ENSCHIG00000018949	K00522	FTH1; ferritin heavy chain [EC:1.16.3.2]
ENSCHIG00000010212	K00546	HNMT; histamine N-methyltransferase [EC:2.1.1.8]
ENSCHIG00000000324	K00548	metH, MTR; 5-methyltetrahydrofolate--homocysteine methyltransferase [EC:2.1.1.13]
ENSCHIG00000008939	K00551	PEMT; phosphatidylethanolamine/phosphatidyl-N-methylethanolamine N-methyltransferase [EC:2.1.1.17 2.1.1.71]
ENSCHIG00000026364	K00552	GNMT; glycine N-methyltransferase [EC:2.1.1.20]
ENSCHIG00000013569	K00555	TRMT1, trm1; tRNA (guanine26-N2/guanine27-N2)-dimethyltransferase [EC:2.1.1.215 2.1.1.216]
ENSCHIG00000023294	K00558	DNMT1, dcm; DNA (cytosine-5)-methyltransferase 1 [EC:2.1.1.37]
ENSCHIG00000000075	K00560	thyA, TYMS; thymidylate synthase [EC:2.1.1.45]
ENSCHIG00000000428	K00565	RNMT; mRNA (guanine-N7-)-methyltransferase [EC:2.1.1.56]
ENSCHIG00000005780	K00569	TPMT, tpmT; thiopurine S-methyltransferase [EC:2.1.1.67]
ENSCHIG00000014632	K00572	WNT7; wingless-type MMTV integration site family, member 7
ENSCHIG00000024195	K00573	E2.1.1.77, pcm; protein-L-isoaspartate(D-aspartate) O-methyltransferase [EC:2.1.1.77]
ENSCHIG00000025710	K00573	E2.1.1.77, pcm; protein-L-isoaspartate(D-aspartate) O-methyltransferase [EC:2.1.1.77]
ENSCHIG00000022866	K00586	DPH5; diphthine methyl ester synthase [EC:2.1.1.314]
ENSCHIG00000005405	K00588	E2.1.1.104; caffeoyl-CoA O-methyltransferase [EC:2.1.1.104]
ENSCHIG00000019340	K00597	MTRR; methionine synthase reductase [EC:1.16.1.8]
ENSCHIG00000021242	K00599	METTL6; methyltransferase-like protein 6 [EC:2.1.1.-]
ENSCHIG00000003271	K00600	glyA, SHMT; glycine hydroxymethyltransferase [EC:2.1.2.1]
ENSCHIG00000013438	K00600	glyA, SHMT; glycine hydroxymethyltransferase [EC:2.1.2.1]
ENSCHIG00000018659	K00602	purH; phosphoribosylaminoimidazolecarboxamide formyltransferase / IMP cyclohydrolase [EC:2.1.2.3 3.5.4.10]
ENSCHIG00000017556	K00605	gcvT, AMT; aminomethyltransferase [EC:2.1.2.10]
ENSCHIG00000017304	K00613	GATM; glycine amidinotransferase [EC:2.1.4.1]
ENSCHIG00000014778	K00615	E2.2.1.1, tktA, tktB; transketolase [EC:2.2.1.1]
ENSCHIG00000021864	K00615	E2.2.1.1, tktA, tktB; transketolase [EC:2.2.1.1]
ENSCHIG00000020819	K00621	GNPNAT1, GNA1; glucosamine-phosphate N-acetyltransferase [EC:2.3.1.4]
ENSCHIG00000011996	K00622	nat; arylamine N-acetyltransferase [EC:2.3.1.5]
ENSCHIG00000015594	K00623	CHAT; choline O-acetyltransferase [EC:2.3.1.6]
ENSCHIG00000016047	K00624	E2.3.1.7; carnitine O-acetyltransferase [EC:2.3.1.7]
ENSCHIG00000017426	K00626	E2.3.1.9, atoB; acetyl-CoA C-acetyltransferase [EC:2.3.1.9]
ENSCHIG00000021198	K00626	E2.3.1.9, atoB; acetyl-CoA C-acetyltransferase [EC:2.3.1.9]
ENSCHIG00000020818	K00627	DLAT, aceF, pdhC; pyruvate dehydrogenase E2 component (dihydrolipoamide acetyltransferase) [EC:2.3.1.12]
ENSCHIG00000020572	K00629	GPAT1_2; glycerol-3-phosphate O-acyltransferase 1/2 [EC:2.3.1.15]
ENSCHIG00000021424	K00637	SOAT; sterol O-acyltransferase [EC:2.3.1.26]
ENSCHIG00000025165	K00637	SOAT; sterol O-acyltransferase [EC:2.3.1.26]
ENSCHIG00000010498	K00639	kbl, GCAT; glycine C-acetyltransferase [EC:2.3.1.29]
ENSCHIG00000012841	K00649	GNPAT; glyceronephosphate O-acyltransferase [EC:2.3.1.42]
ENSCHIG00000014005	K00650	LCAT; lecithin-cholesterol acyltransferase [EC:2.3.1.43]
ENSCHIG00000016668	K00654	SPT; serine palmitoyltransferase [EC:2.3.1.50]
ENSCHIG00000021963	K00654	SPT; serine palmitoyltransferase [EC:2.3.1.50]
ENSCHIG00000008642	K00657	speG, SAT; diamine N-acetyltransferase [EC:2.3.1.57]
ENSCHIG00000015687	K00658	DLST, sucB; 2-oxoglutarate dehydrogenase E2 component (dihydrolipoamide succinyltransferase) [EC:2.3.1.61]
ENSCHIG00000024836	K00659	BAAT; bile acid-CoA:amino acid N-acyltransferase [EC:2.3.1.65 3.1.2.2]
ENSCHIG00000018422	K00665	FASN; fatty acid synthase, animal type [EC:2.3.1.85]
ENSCHIG00000017557	K00671	NMT; glycylpeptide N-tetradecanoyltransferase [EC:2.3.1.97]
ENSCHIG00000016909	K00683	QPCT; glutaminyl-peptide cyclotransferase [EC:2.3.2.5]
ENSCHIG00000011255	K00688	PYG, glgP; glycogen phosphorylase [EC:2.4.1.1]
ENSCHIG00000025986	K00688	PYG, glgP; glycogen phosphorylase [EC:2.4.1.1]
ENSCHIG00000026825	K00688	PYG, glgP; glycogen phosphorylase [EC:2.4.1.1]
ENSCHIG00000017550	K00693	GYS; glycogen synthase [EC:2.4.1.11]
ENSCHIG00000002450	K00699	UGT; glucuronosyltransferase [EC:2.4.1.17]
ENSCHIG00000010368	K00699	UGT; glucuronosyltransferase [EC:2.4.1.17]
ENSCHIG00000020938	K00699	UGT; glucuronosyltransferase [EC:2.4.1.17]
ENSCHIG00000022594	K00699	UGT; glucuronosyltransferase [EC:2.4.1.17]
ENSCHIG00000022816	K00699	UGT; glucuronosyltransferase [EC:2.4.1.17]
ENSCHIG00000025102	K00700	GBE1, glgB; 1,4-alpha-glucan branching enzyme [EC:2.4.1.18]
ENSCHIG00000016256	K00709	ABO; histo-blood group ABO system transferase [EC:2.4.1.40 2.4.1.37]
ENSCHIG00000001864	K00710	GALNT; polypeptide N-acetylgalactosaminyltransferase [EC:2.4.1.41]
ENSCHIG00000010238	K00710	GALNT; polypeptide N-acetylgalactosaminyltransferase [EC:2.4.1.41]
ENSCHIG00000010696	K00710	GALNT; polypeptide N-acetylgalactosaminyltransferase [EC:2.4.1.41]
ENSCHIG00000012207	K00710	GALNT; polypeptide N-acetylgalactosaminyltransferase [EC:2.4.1.41]
ENSCHIG00000013053	K00710	GALNT; polypeptide N-acetylgalactosaminyltransferase [EC:2.4.1.41]
ENSCHIG00000017035	K00710	GALNT; polypeptide N-acetylgalactosaminyltransferase [EC:2.4.1.41]
ENSCHIG00000017266	K00710	GALNT; polypeptide N-acetylgalactosaminyltransferase [EC:2.4.1.41]
ENSCHIG00000018784	K00710	GALNT; polypeptide N-acetylgalactosaminyltransferase [EC:2.4.1.41]
ENSCHIG00000024307	K00710	GALNT; polypeptide N-acetylgalactosaminyltransferase [EC:2.4.1.41]
ENSCHIG00000024703	K00710	GALNT; polypeptide N-acetylgalactosaminyltransferase [EC:2.4.1.41]
ENSCHIG00000025267	K00710	GALNT; polypeptide N-acetylgalactosaminyltransferase [EC:2.4.1.41]
ENSCHIG00000026778	K00710	GALNT; polypeptide N-acetylgalactosaminyltransferase [EC:2.4.1.41]
ENSCHIG00000022296	K00714	WNT8; wingless-type MMTV integration site family, member 8
ENSCHIG00000013295	K00715	B3GALT4; ganglioside galactosyltransferase [EC:2.4.1.62]
ENSCHIG00000007488	K00717	FUT8; glycoprotein 6-alpha-L-fucosyltransferase [EC:2.4.1.68]
ENSCHIG00000014375	K00718	FUT1_2; galactoside 2-L-fucosyltransferase 1/2 [EC:2.4.1.69]
ENSCHIG00000023768	K00718	FUT1_2; galactoside 2-L-fucosyltransferase 1/2 [EC:2.4.1.69]
ENSCHIG00000024448	K00721	DPM1; dolichol-phosphate mannosyltransferase [EC:2.4.1.83]
ENSCHIG00000011247	K00722	GBGT1; globoside alpha-N-acetylgalactosaminyltransferase [EC:2.4.1.88]
ENSCHIG00000026781	K00725	B4GALNT1, GALGT; (N-Acetylneuraminyl)-galactosylglucosylceramide N-acetylgalactosaminyltransferase [EC:2.4.1.92]
ENSCHIG00000009572	K00726	MGAT1; alpha-1,3-mannosyl-glycoprotein beta-1,2-N-acetylglucosaminyltransferase [EC:2.4.1.101]
ENSCHIG00000024383	K00728	POMT, pmt; dolichyl-phosphate-mannose-protein mannosyltransferase [EC:2.4.1.109]
ENSCHIG00000015926	K00729	ALG5; dolichyl-phosphate beta-glucosyltransferase [EC:2.4.1.117]
ENSCHIG00000025282	K00731	C1GALT1; glycoprotein-N-acetylgalactosamine 3-beta-galactosyltransferase [EC:2.4.1.122]
ENSCHIG00000010475	K00734	B3GALT6; galactosylxylosylprotein 3-beta-galactosyltransferase [EC:2.4.1.134]
ENSCHIG00000010952	K00736	MGAT2; alpha-1,6-mannosyl-glycoprotein beta-1,2-N-acetylglucosaminyltransferase [EC:2.4.1.143]
ENSCHIG00000010088	K00738	MGAT4A_B; alpha-1,3-mannosylglycoprotein beta-1,4-N-acetylglucosaminyltransferase A/B [EC:2.4.1.145]
ENSCHIG00000015516	K00738	MGAT4A_B; alpha-1,3-mannosylglycoprotein beta-1,4-N-acetylglucosaminyltransferase A/B [EC:2.4.1.145]
ENSCHIG00000003265	K00739	B3GNT6; acetylgalactosaminyl-O-glycosyl-glycoprotein beta-1,3-N-acetylglucosaminyltransferase [EC:2.4.1.147]
ENSCHIG00000009561	K00741	B3GNT2; N-acetyllactosaminide beta-1,3-N-acetylglucosaminyltransferase [EC:2.4.1.149]
ENSCHIG00000023562	K00743	GGTA1; N-acetyllactosaminide 3-alpha-galactosyltransferase [EC:2.4.1.87]
ENSCHIG00000027215	K00744	MGAT5; alpha-1,3(6)-mannosylglycoprotein beta-1,6-N-acetyl-glucosaminyltransferase [EC:2.4.1.155]
ENSCHIG00000017330	K00750	GYG1, GYG2; glycogenin [EC:2.4.1.186]
ENSCHIG00000013475	K00752	hasA; hyaluronan synthase [EC:2.4.1.212]
ENSCHIG00000014663	K00757	udp, UPP; uridine phosphorylase [EC:2.4.2.3]
ENSCHIG00000018530	K00759	APRT, apt; adenine phosphoribosyltransferase [EC:2.4.2.7]
ENSCHIG00000019326	K00760	hprT, hpt, HPRT1; hypoxanthine phosphoribosyltransferase [EC:2.4.2.8]
ENSCHIG00000014486	K00763	pncB, NAPRT1; nicotinate phosphoribosyltransferase [EC:6.3.4.21]
ENSCHIG00000020454	K00767	nadC, QPRT; nicotinate-nucleotide pyrophosphorylase (carboxylating) [EC:2.4.2.19]
ENSCHIG00000018461	K00771	XYLT; protein xylosyltransferase [EC:2.4.2.26]
ENSCHIG00000026646	K00771	XYLT; protein xylosyltransferase [EC:2.4.2.26]
ENSCHIG00000014137	K00773	tgt, QTRT1; queuine tRNA-ribosyltransferase [EC:2.4.2.29]
ENSCHIG00000011861	K00774	PARP16; poly [ADP-ribose] polymerase 16 [EC:2.4.2.30]
ENSCHIG00000013392	K00778	SIAT1, ST6GAL1; beta-galactoside alpha-2,6-sialyltransferase (sialyltransferase 1) [EC:2.4.99.1]
ENSCHIG00000013738	K00779	SIAT2, ST6GAL2; beta-galactoside alpha-2,6-sialyltransferase (sialyltransferase 2) [EC:2.4.99.1]
ENSCHIG00000021799	K00780	SIAT4A; beta-galactoside alpha-2,3-sialyltransferase (sialyltransferase 4A) [EC:2.4.99.4]
ENSCHIG00000014278	K00784	rnz; ribonuclease Z [EC:3.1.26.11]
ENSCHIG00000025992	K00784	rnz; ribonuclease Z [EC:3.1.26.11]
ENSCHIG00000020170	K00787	FDPS; farnesyl diphosphate synthase [EC:2.5.1.1 2.5.1.10]
ENSCHIG00000009411	K00789	metK; S-adenosylmethionine synthetase [EC:2.5.1.6]
ENSCHIG00000026409	K00789	metK; S-adenosylmethionine synthetase [EC:2.5.1.6]
ENSCHIG00000000534	K00798	MMAB, pduO; cob(I)alamin adenosyltransferase [EC:2.5.1.17]
ENSCHIG00000003139	K00799	GST, gst; glutathione S-transferase [EC:2.5.1.18]
ENSCHIG00000009359	K00799	GST, gst; glutathione S-transferase [EC:2.5.1.18]
ENSCHIG00000010819	K00799	GST, gst; glutathione S-transferase [EC:2.5.1.18]
ENSCHIG00000010963	K00799	GST, gst; glutathione S-transferase [EC:2.5.1.18]
ENSCHIG00000011258	K00799	GST, gst; glutathione S-transferase [EC:2.5.1.18]
ENSCHIG00000012768	K00799	GST, gst; glutathione S-transferase [EC:2.5.1.18]
ENSCHIG00000016853	K00799	GST, gst; glutathione S-transferase [EC:2.5.1.18]
ENSCHIG00000019373	K00799	GST, gst; glutathione S-transferase [EC:2.5.1.18]
ENSCHIG00000023592	K00799	GST, gst; glutathione S-transferase [EC:2.5.1.18]
ENSCHIG00000024688	K00799	GST, gst; glutathione S-transferase [EC:2.5.1.18]
ENSCHIG00000026143	K00799	GST, gst; glutathione S-transferase [EC:2.5.1.18]
ENSCHIG00000024342	K00801	FDFT1; farnesyl-diphosphate farnesyltransferase [EC:2.5.1.21]
ENSCHIG00000015256	K00803	AGPS, agpS; alkyldihydroxyacetonephosphate synthase [EC:2.5.1.26]
ENSCHIG00000026999	K00807	LTC4S; leukotriene-C4 synthase [EC:4.4.1.20]
ENSCHIG00000011017	K00809	DHPS, dys; deoxyhypusine synthase [EC:2.5.1.46]
ENSCHIG00000011432	K00810	UBIAD1; menadiol prenyltransferase [EC:2.5.1.-]
ENSCHIG00000016927	K00814	GPT, ALT; alanine transaminase [EC:2.6.1.2]
ENSCHIG00000027095	K00814	GPT, ALT; alanine transaminase [EC:2.6.1.2]
ENSCHIG00000018390	K00815	TAT; tyrosine aminotransferase [EC:2.6.1.5]
ENSCHIG00000015959	K00816	CCBL; kynurenine---oxoglutarate transaminase / cysteine-S-conjugate beta-lyase / glutamine---phenylpyruvate transaminase [EC:2.6.1.7 4.4.1.13 2.6.1.64]
ENSCHIG00000020038	K00816	CCBL; kynurenine---oxoglutarate transaminase / cysteine-S-conjugate beta-lyase / glutamine---phenylpyruvate transaminase [EC:2.6.1.7 4.4.1.13 2.6.1.64]
ENSCHIG00000014280	K00819	rocD, OAT; ornithine--oxo-acid transaminase [EC:2.6.1.13]
ENSCHIG00000026349	K00819	rocD, OAT; ornithine--oxo-acid transaminase [EC:2.6.1.13]
ENSCHIG00000021854	K00820	glmS, GFPT; glutamine---fructose-6-phosphate transaminase (isomerizing) [EC:2.6.1.16]
ENSCHIG00000025952	K00820	glmS, GFPT; glutamine---fructose-6-phosphate transaminase (isomerizing) [EC:2.6.1.16]
ENSCHIG00000025032	K00825	AADAT, KAT2; kynurenine/2-aminoadipate aminotransferase [EC:2.6.1.7 2.6.1.39]
ENSCHIG00000008019	K00826	E2.6.1.42, ilvE; branched-chain amino acid aminotransferase [EC:2.6.1.42]
ENSCHIG00000022496	K00830	AGXT; alanine-glyoxylate transaminase / serine-glyoxylate transaminase / serine-pyruvate transaminase [EC:2.6.1.44 2.6.1.45 2.6.1.51]
ENSCHIG00000023475	K00831	serC, PSAT1; phosphoserine aminotransferase [EC:2.6.1.52]
ENSCHIG00000000496	K00844	HK; hexokinase [EC:2.7.1.1]
ENSCHIG00000010678	K00844	HK; hexokinase [EC:2.7.1.1]
ENSCHIG00000012393	K00844	HK; hexokinase [EC:2.7.1.1]
ENSCHIG00000024620	K00846	KHK; ketohexokinase [EC:2.7.1.3]
ENSCHIG00000004957	K00849	galK; galactokinase [EC:2.7.1.6]
ENSCHIG00000024946	K00850	pfkA, PFK; 6-phosphofructokinase 1 [EC:2.7.1.11]
ENSCHIG00000025820	K00850	pfkA, PFK; 6-phosphofructokinase 1 [EC:2.7.1.11]
ENSCHIG00000013719	K00852	rbsK, RBKS; ribokinase [EC:2.7.1.15]
ENSCHIG00000000113	K00856	E2.7.1.20, ADK; adenosine kinase [EC:2.7.1.20]
ENSCHIG00000025188	K00857	tdk, TK; thymidine kinase [EC:2.7.1.21]
ENSCHIG00000012491	K00858	ppnK, NADK; NAD+ kinase [EC:2.7.1.23]
ENSCHIG00000023452	K00858	ppnK, NADK; NAD+ kinase [EC:2.7.1.23]
ENSCHIG00000026749	K00859	coaE; dephospho-CoA kinase [EC:2.7.1.24]
ENSCHIG00000023491	K00861	RFK, FMN1; riboflavin kinase [EC:2.7.1.26]
ENSCHIG00000008616	K00868	pdxK, pdxY; pyridoxine kinase [EC:2.7.1.35]
ENSCHIG00000023958	K00869	E2.7.1.36, MVK, mvaK1; mevalonate kinase [EC:2.7.1.36]
ENSCHIG00000020315	K00871	PHKG; phosphorylase kinase gamma subunit [EC:2.7.11.19]
ENSCHIG00000016056	K00873	PK, pyk; pyruvate kinase [EC:2.7.1.40]
ENSCHIG00000015194	K00876	udk, UCK; uridine kinase [EC:2.7.1.48]
ENSCHIG00000023693	K00876	udk, UCK; uridine kinase [EC:2.7.1.48]
ENSCHIG00000025409	K00884	NAGK, nagK; N-acetylglucosamine kinase [EC:2.7.1.59]
ENSCHIG00000015013	K00889	PIP5K; 1-phosphatidylinositol-4-phosphate 5-kinase [EC:2.7.1.68]
ENSCHIG00000023785	K00889	PIP5K; 1-phosphatidylinositol-4-phosphate 5-kinase [EC:2.7.1.68]
ENSCHIG00000004048	K00894	ETNK, EKI; ethanolamine kinase [EC:2.7.1.82]
ENSCHIG00000010576	K00894	ETNK, EKI; ethanolamine kinase [EC:2.7.1.82]
ENSCHIG00000013432	K00898	PDK2_3_4; pyruvate dehydrogenase kinase 2/3/4 [EC:2.7.11.2]
ENSCHIG00000022189	K00898	PDK2_3_4; pyruvate dehydrogenase kinase 2/3/4 [EC:2.7.11.2]
ENSCHIG00000006200	K00901	dgkA, DGK; diacylglycerol kinase (ATP) [EC:2.7.1.107]
ENSCHIG00000013491	K00901	dgkA, DGK; diacylglycerol kinase (ATP) [EC:2.7.1.107]
ENSCHIG00000018020	K00901	dgkA, DGK; diacylglycerol kinase (ATP) [EC:2.7.1.107]
ENSCHIG00000022963	K00901	dgkA, DGK; diacylglycerol kinase (ATP) [EC:2.7.1.107]
ENSCHIG00000025662	K00901	dgkA, DGK; diacylglycerol kinase (ATP) [EC:2.7.1.107]
ENSCHIG00000025152	K00904	DGUOK; deoxyguanosine kinase [EC:2.7.1.113]
ENSCHIG00000022507	K00905	BCKDK; [3-methyl-2-oxobutanoate dehydrogenase (acetyl-transferring)] kinase [EC:2.7.11.4]
ENSCHIG00000015809	K00907	MYLK; myosin-light-chain kinase [EC:2.7.11.18]
ENSCHIG00000019426	K00908	CAMKK1; calcium/calmodulin-dependent protein kinase kinase 1 [EC:2.7.11.17]
ENSCHIG00000021555	K00910	ADRBK, GRK; beta-adrenergic-receptor kinase [EC:2.7.11.15]
ENSCHIG00000022667	K00910	ADRBK, GRK; beta-adrenergic-receptor kinase [EC:2.7.11.15]
ENSCHIG00000012389	K00911	ITPK; 1D-myo-inositol-triphosphate 3-kinase [EC:2.7.1.127]
ENSCHIG00000027230	K00911	ITPK; 1D-myo-inositol-triphosphate 3-kinase [EC:2.7.1.127]
ENSCHIG00000015348	K00914	PIK3C3, VPS34; phosphatidylinositol 3-kinase [EC:2.7.1.137]
ENSCHIG00000010259	K00920	PIP4K2; 1-phosphatidylinositol-5-phosphate 4-kinase [EC:2.7.1.149]
ENSCHIG00000022526	K00920	PIP4K2; 1-phosphatidylinositol-5-phosphate 4-kinase [EC:2.7.1.149]
ENSCHIG00000022865	K00920	PIP4K2; 1-phosphatidylinositol-5-phosphate 4-kinase [EC:2.7.1.149]
ENSCHIG00000018742	K00921	PIKFYVE, FAB1; 1-phosphatidylinositol-3-phosphate 5-kinase [EC:2.7.1.150]
ENSCHIG00000016154	K00922	PIK3CA_B_D; phosphatidylinositol-4,5-bisphosphate 3-kinase catalytic subunit alpha/beta/delta [EC:2.7.1.153]
ENSCHIG00000019728	K00922	PIK3CA_B_D; phosphatidylinositol-4,5-bisphosphate 3-kinase catalytic subunit alpha/beta/delta [EC:2.7.1.153]
ENSCHIG00000020175	K00922	PIK3CA_B_D; phosphatidylinositol-4,5-bisphosphate 3-kinase catalytic subunit alpha/beta/delta [EC:2.7.1.153]
ENSCHIG00000015119	K00923	PIK3C2; phosphatidylinositol-4-phosphate 3-kinase [EC:2.7.1.154]
ENSCHIG00000019158	K00923	PIK3C2; phosphatidylinositol-4-phosphate 3-kinase [EC:2.7.1.154]
ENSCHIG00000018578	K00933	E2.7.3.2; creatine kinase [EC:2.7.3.2]
ENSCHIG00000024701	K00933	E2.7.3.2; creatine kinase [EC:2.7.3.2]
ENSCHIG00000007647	K00939	adk, AK; adenylate kinase [EC:2.7.4.3]
ENSCHIG00000011217	K00939	adk, AK; adenylate kinase [EC:2.7.4.3]
ENSCHIG00000017668	K00939	adk, AK; adenylate kinase [EC:2.7.4.3]
ENSCHIG00000023918	K00939	adk, AK; adenylate kinase [EC:2.7.4.3]
ENSCHIG00000025470	K00939	adk, AK; adenylate kinase [EC:2.7.4.3]
ENSCHIG00000020916	K00940	ndk, NME; nucleoside-diphosphate kinase [EC:2.7.4.6]
ENSCHIG00000023673	K00940	ndk, NME; nucleoside-diphosphate kinase [EC:2.7.4.6]
ENSCHIG00000020301	K00942	E2.7.4.8, gmk; guanylate kinase [EC:2.7.4.8]
ENSCHIG00000024323	K00943	tmk, DTYMK; dTMP kinase [EC:2.7.4.9]
ENSCHIG00000022807	K00948	PRPS, prsA; ribose-phosphate pyrophosphokinase [EC:2.7.6.1]
ENSCHIG00000026531	K00948	PRPS, prsA; ribose-phosphate pyrophosphokinase [EC:2.7.6.1]
ENSCHIG00000012810	K00949	thiN, TPK1, THI80; thiamine pyrophosphokinase [EC:2.7.6.2]
ENSCHIG00000025405	K00953	FLAD1; FAD synthetase [EC:2.7.7.2]
ENSCHIG00000025034	K00962	pnp, PNPT1; polyribonucleotide nucleotidyltransferase [EC:2.7.7.8]
ENSCHIG00000021810	K00963	UGP2, galU, galF; UTP--glucose-1-phosphate uridylyltransferase [EC:2.7.7.9]
ENSCHIG00000025657	K00965	galT, GALT; UDPglucose--hexose-1-phosphate uridylyltransferase [EC:2.7.7.12]
ENSCHIG00000017296	K00966	GMPP; mannose-1-phosphate guanylyltransferase [EC:2.7.7.13]
ENSCHIG00000007479	K00967	PCYT2; ethanolamine-phosphate cytidylyltransferase [EC:2.7.7.14]
ENSCHIG00000019026	K00968	PCYT1; choline-phosphate cytidylyltransferase [EC:2.7.7.15]
ENSCHIG00000012172	K00972	UAP1; UDP-N-acetylglucosamine/UDP-N-acetylgalactosamine diphosphorylase [EC:2.7.7.23 2.7.7.83]
ENSCHIG00000015675	K00972	UAP1; UDP-N-acetylglucosamine/UDP-N-acetylgalactosamine diphosphorylase [EC:2.7.7.23 2.7.7.83]
ENSCHIG00000021991	K00976	FPGT; fucose-1-phosphate guanylyltransferase [EC:2.7.7.30]
ENSCHIG00000021292	K00981	E2.7.7.41, CDS1, CDS2, cdsA; phosphatidate cytidylyltransferase [EC:2.7.7.41]
ENSCHIG00000013868	K00993	EPT1; ethanolaminephosphotransferase [EC:2.7.8.1]
ENSCHIG00000009936	K00994	CHPT1, CPT1; diacylglycerol cholinephosphotransferase [EC:2.7.8.2]
ENSCHIG00000019243	K00999	CDIPT; CDP-diacylglycerol--inositol 3-phosphatidyltransferase [EC:2.7.8.11]
ENSCHIG00000027098	K01008	selD, SEPHS; selenide, water dikinase [EC:2.7.9.3]
ENSCHIG00000014317	K01011	TST, MPST, sseA; thiosulfate/3-mercaptopyruvate sulfurtransferase [EC:2.8.1.1 2.8.1.2]
ENSCHIG00000026912	K01011	TST, MPST, sseA; thiosulfate/3-mercaptopyruvate sulfurtransferase [EC:2.8.1.1 2.8.1.2]
ENSCHIG00000013830	K01013	TSTD1; thiosulfate:glutathione sulfurtransferase [EC:2.8.1.-]
ENSCHIG00000025683	K01013	TSTD1; thiosulfate:glutathione sulfurtransferase [EC:2.8.1.-]
ENSCHIG00000019289	K01014	SULT1A; aryl sulfotransferase [EC:2.8.2.1]
ENSCHIG00000023093	K01015	SULT2B1; alcohol sulfotransferase [EC:2.8.2.2]
ENSCHIG00000020392	K01020	CHST3; chondroitin 6-sulfotransferase 3 [EC:2.8.2.17]
ENSCHIG00000017862	K01021	TPST; protein-tyrosine sulfotransferase [EC:2.8.2.20]
ENSCHIG00000020421	K01021	TPST; protein-tyrosine sulfotransferase [EC:2.8.2.20]
ENSCHIG00000008696	K01022	CHST1; keratan sulfate 6-sulfotransferase 1 [EC:2.8.2.21]
ENSCHIG00000004675	K01024	HS3ST1; [heparan sulfate]-glucosamine 3-sulfotransferase 1 [EC:2.8.2.23]
ENSCHIG00000013564	K01025	SULT1; sulfotransferase [EC:2.8.2.-]
ENSCHIG00000020949	K01025	SULT1; sulfotransferase [EC:2.8.2.-]
ENSCHIG00000023114	K01025	SULT1; sulfotransferase [EC:2.8.2.-]
ENSCHIG00000012124	K01027	OXCT; 3-oxoacid CoA-transferase [EC:2.8.3.5]
ENSCHIG00000016650	K01044	CES1; carboxylesterase 1 [EC:3.1.1.1]
ENSCHIG00000025848	K01044	CES1; carboxylesterase 1 [EC:3.1.1.1]
ENSCHIG00000023025	K01045	PON; arylesterase / paraoxonase [EC:3.1.1.2 3.1.8.1]
ENSCHIG00000010082	K01047	PLA2G, SPLA2; secretory phospholipase A2 [EC:3.1.1.4]
ENSCHIG00000010431	K01047	PLA2G, SPLA2; secretory phospholipase A2 [EC:3.1.1.4]
ENSCHIG00000011377	K01047	PLA2G, SPLA2; secretory phospholipase A2 [EC:3.1.1.4]
ENSCHIG00000016550	K01047	PLA2G, SPLA2; secretory phospholipase A2 [EC:3.1.1.4]
ENSCHIG00000019559	K01047	PLA2G, SPLA2; secretory phospholipase A2 [EC:3.1.1.4]
ENSCHIG00000019640	K01047	PLA2G, SPLA2; secretory phospholipase A2 [EC:3.1.1.4]
ENSCHIG00000020720	K01047	PLA2G, SPLA2; secretory phospholipase A2 [EC:3.1.1.4]
ENSCHIG00000022123	K01047	PLA2G, SPLA2; secretory phospholipase A2 [EC:3.1.1.4]
ENSCHIG00000022339	K01047	PLA2G, SPLA2; secretory phospholipase A2 [EC:3.1.1.4]
ENSCHIG00000024591	K01047	PLA2G, SPLA2; secretory phospholipase A2 [EC:3.1.1.4]
ENSCHIG00000026641	K01047	PLA2G, SPLA2; secretory phospholipase A2 [EC:3.1.1.4]
ENSCHIG00000007760	K01052	LIPA; lysosomal acid lipase/cholesteryl ester hydrolase [EC:3.1.1.13]
ENSCHIG00000019246	K01052	LIPA; lysosomal acid lipase/cholesteryl ester hydrolase [EC:3.1.1.13]
ENSCHIG00000011090	K01054	MGLL; acylglycerol lipase [EC:3.1.1.23]
ENSCHIG00000023506	K01061	E3.1.1.45; carboxymethylenebutenolidase [EC:3.1.1.45]
ENSCHIG00000014030	K01062	PLA2G7, PAFAH; platelet-activating factor acetylhydrolase [EC:3.1.1.47]
ENSCHIG00000020000	K01062	PLA2G7, PAFAH; platelet-activating factor acetylhydrolase [EC:3.1.1.47]
ENSCHIG00000013624	K01068	ACOT1_2_4; acyl-coenzyme A thioesterase 1/2/4 [EC:3.1.2.2]
ENSCHIG00000015407	K01068	ACOT1_2_4; acyl-coenzyme A thioesterase 1/2/4 [EC:3.1.2.2]
ENSCHIG00000025534	K01068	ACOT1_2_4; acyl-coenzyme A thioesterase 1/2/4 [EC:3.1.2.2]
ENSCHIG00000022722	K01069	gloB, gloC, HAGH; hydroxyacylglutathione hydrolase [EC:3.1.2.6]
ENSCHIG00000021306	K01070	frmB, ESD, fghA; S-formylglutathione hydrolase [EC:3.1.2.12]
ENSCHIG00000016544	K01074	PPT; palmitoyl-protein thioesterase [EC:3.1.2.22]
ENSCHIG00000013948	K01076	ABHD17; abhydrolase domain-containing protein 17 [EC:3.1.2.22]
ENSCHIG00000017282	K01076	ABHD17; abhydrolase domain-containing protein 17 [EC:3.1.2.22]
ENSCHIG00000027051	K01076	ABHD17; abhydrolase domain-containing protein 17 [EC:3.1.2.22]
ENSCHIG00000009791	K01077	E3.1.3.1, phoA, phoB; alkaline phosphatase [EC:3.1.3.1]
ENSCHIG00000012120	K01077	E3.1.3.1, phoA, phoB; alkaline phosphatase [EC:3.1.3.1]
ENSCHIG00000008890	K01079	serB, PSPH; phosphoserine phosphatase [EC:3.1.3.3]
ENSCHIG00000020725	K01080	PLPP1_2_3; phosphatidate phosphatase [EC:3.1.3.4]
ENSCHIG00000022600	K01080	PLPP1_2_3; phosphatidate phosphatase [EC:3.1.3.4]
ENSCHIG00000026941	K01080	PLPP1_2_3; phosphatidate phosphatase [EC:3.1.3.4]
ENSCHIG00000011274	K01082	cysQ, MET22, BPNT1; 3'(2'), 5'-bisphosphate nucleotidase [EC:3.1.3.7]
ENSCHIG00000009637	K01084	G6PC; glucose-6-phosphatase [EC:3.1.3.9]
ENSCHIG00000016111	K01092	E3.1.3.25, IMPA, suhB; myo-inositol-1(or 4)-monophosphatase [EC:3.1.3.25]
ENSCHIG00000022749	K01092	E3.1.3.25, IMPA, suhB; myo-inositol-1(or 4)-monophosphatase [EC:3.1.3.25]
ENSCHIG00000011431	K01099	INPP5B_F; inositol polyphosphate 5-phosphatase INPP5B/F [EC:3.1.3.36]
ENSCHIG00000007829	K01102	PDP; pyruvate dehydrogenase phosphatase [EC:3.1.3.43]
ENSCHIG00000021127	K01102	PDP; pyruvate dehydrogenase phosphatase [EC:3.1.3.43]
ENSCHIG00000013342	K01106	E3.1.3.56; inositol-1,4,5-trisphosphate 5-phosphatase [EC:3.1.3.56]
ENSCHIG00000016158	K01106	E3.1.3.56; inositol-1,4,5-trisphosphate 5-phosphatase [EC:3.1.3.56]
ENSCHIG00000006554	K01107	INPP1; inositol polyphosphate 1-phosphatase [EC:3.1.3.57]
ENSCHIG00000019789	K01109	INPP4; inositol polyphosphate-4-phosphatase [EC:3.1.3.66]
ENSCHIG00000024300	K01109	INPP4; inositol polyphosphate-4-phosphatase [EC:3.1.3.66]
ENSCHIG00000006638	K01110	PTEN; phosphatidylinositol-3,4,5-trisphosphate 3-phosphatase and dual-specificity protein phosphatase PTEN [EC:3.1.3.16 3.1.3.48 3.1.3.67]
ENSCHIG00000010044	K01115	PLD1_2; phospholipase D1/2 [EC:3.1.4.4]
ENSCHIG00000021296	K01115	PLD1_2; phospholipase D1/2 [EC:3.1.4.4]
ENSCHIG00000024684	K01116	PLCG1; phosphatidylinositol phospholipase C, gamma-1 [EC:3.1.4.11]
ENSCHIG00000007203	K01121	CNP; 2',3'-cyclic-nucleotide 3'-phosphodiesterase [EC:3.1.4.37]
ENSCHIG00000018203	K01122	ENPP2; ectonucleotide pyrophosphatase/phosphodiesterase family member 2 [EC:3.1.4.39]
ENSCHIG00000014683	K01124	GDPD2; glycerophosphoinositol inositolphosphodiesterase [EC:3.1.4.43]
ENSCHIG00000022979	K01125	NAGPA; N-acetylglucosamine-1-phosphodiester alpha-N-acetylglucosaminidase [EC:3.1.4.45]
ENSCHIG00000007307	K01127	GPLD1; glycosylphosphatidylinositol phospholipase D [EC:3.1.4.50]
ENSCHIG00000021420	K01128	SMPDL3; sphingomyelin phosphodiesterase acid-like 3 [EC:3.1.4.-]
ENSCHIG00000014398	K01132	GALNS; N-acetylgalactosamine-6-sulfatase [EC:3.1.6.4]
ENSCHIG00000001349	K01135	ARSB; arylsulfatase B [EC:3.1.6.12]
ENSCHIG00000013188	K01137	GNS; N-acetylglucosamine-6-sulfatase [EC:3.1.6.14]
ENSCHIG00000018143	K01148	PARN, PNLDC1; poly(A)-specific ribonuclease [EC:3.1.13.4]
ENSCHIG00000018237	K01158	DNASE2; deoxyribonuclease II [EC:3.1.22.1]
ENSCHIG00000017066	K01164	POP1; ribonuclease P/MRP protein subunit POP1 [EC:3.1.26.5]
ENSCHIG00000012401	K01168	RNASE1_2; pancreatic ribonuclease [EC:4.6.1.18]
ENSCHIG00000013517	K01168	RNASE1_2; pancreatic ribonuclease [EC:4.6.1.18]
ENSCHIG00000002321	K01172	RNASE6_7_8; ribonuclease 6/7/8 [EC:3.1.27.-]
ENSCHIG00000020781	K01173	ENDOG; endonuclease G, mitochondrial
ENSCHIG00000011024	K01186	NEU1; sialidase-1 [EC:3.2.1.18]
ENSCHIG00000017230	K01191	MAN2C1; alpha-mannosidase [EC:3.2.1.24]
ENSCHIG00000020841	K01192	E3.2.1.25, MANBA, manB; beta-mannosidase [EC:3.2.1.25]
ENSCHIG00000021185	K01194	TREH, treA, treF; alpha,alpha-trehalase [EC:3.2.1.28]
ENSCHIG00000026715	K01195	uidA, GUSB; beta-glucuronidase [EC:3.2.1.31]
ENSCHIG00000024129	K01196	AGL; glycogen debranching enzyme [EC:2.4.1.25 3.2.1.33]
ENSCHIG00000008049	K01197	hya; hyaluronoglucosaminidase [EC:3.2.1.35]
ENSCHIG00000020009	K01197	hya; hyaluronoglucosaminidase [EC:3.2.1.35]
ENSCHIG00000023522	K01197	hya; hyaluronoglucosaminidase [EC:3.2.1.35]
ENSCHIG00000018791	K01202	GALC; galactosylceramidase [EC:3.2.1.46]
ENSCHIG00000010240	K01203	SI; sucrase-isomaltase [EC:3.2.1.48 3.2.1.10]
ENSCHIG00000026860	K01204	NAGA; alpha-N-acetylgalactosaminidase [EC:3.2.1.49]
ENSCHIG00000025669	K01205	NAGLU; alpha-N-acetylglucosaminidase [EC:3.2.1.50]
ENSCHIG00000020144	K01206	FUCA; alpha-L-fucosidase [EC:3.2.1.51]
ENSCHIG00000025809	K01217	IDUA; L-iduronidase [EC:3.2.1.76]
ENSCHIG00000018465	K01227	ENGASE; mannosyl-glycoprotein endo-beta-N-acetylglucosaminidase [EC:3.2.1.96]
ENSCHIG00000025527	K01228	MOGS; mannosyl-oligosaccharide glucosidase [EC:3.2.1.106]
ENSCHIG00000017004	K01230	MAN1A_C, MNS1_2; mannosyl-oligosaccharide alpha-1,2-mannosidase [EC:3.2.1.113]
ENSCHIG00000011270	K01231	MAN2; alpha-mannosidase II [EC:3.2.1.114]
ENSCHIG00000003874	K01242	CD38; ADP-ribosyl cyclase 1 [EC:3.2.2.6 2.4.99.20]
ENSCHIG00000024177	K01245	ADPRH; ADP-ribosylarginine hydrolase [EC:3.2.2.19]
ENSCHIG00000019042	K01251	E3.3.1.1, ahcY; adenosylhomocysteinase [EC:3.3.1.1]
ENSCHIG00000023186	K01251	E3.3.1.1, ahcY; adenosylhomocysteinase [EC:3.3.1.1]
ENSCHIG00000026741	K01251	E3.3.1.1, ahcY; adenosylhomocysteinase [EC:3.3.1.1]
ENSCHIG00000017470	K01254	LTA4H; leukotriene-A4 hydrolase [EC:3.3.2.6]
ENSCHIG00000012539	K01257	LNPEP; cystinyl aminopeptidase [EC:3.4.11.3]
ENSCHIG00000020776	K01260	RNPEP; aminopeptidase B [EC:3.4.11.6]
ENSCHIG00000016070	K01262	pepP; Xaa-Pro aminopeptidase [EC:3.4.11.9]
ENSCHIG00000012605	K01267	DNPEP; aspartyl aminopeptidase [EC:3.4.11.21]
ENSCHIG00000013192	K01273	DPEP; membrane dipeptidase [EC:3.4.13.19]
ENSCHIG00000019954	K01273	DPEP; membrane dipeptidase [EC:3.4.13.19]
ENSCHIG00000025807	K01273	DPEP; membrane dipeptidase [EC:3.4.13.19]
ENSCHIG00000013901	K01275	CTSC; cathepsin C [EC:3.4.14.1]
ENSCHIG00000018221	K01276	DPP7; dipeptidyl-peptidase II [EC:3.4.14.2]
ENSCHIG00000021048	K01278	DPP4, CD26; dipeptidyl-peptidase 4 [EC:3.4.14.5]
ENSCHIG00000012043	K01283	ACE, CD143; peptidyl-dipeptidase A [EC:3.4.15.1]
ENSCHIG00000006379	K01292	CPN1; carboxypeptidase N catalytic subunit [EC:3.4.17.3]
ENSCHIG00000025514	K01296	CPM; carboxypeptidase M [EC:3.4.17.12]
ENSCHIG00000018744	K01301	NAALAD; N-acetylated-alpha-linked acidic dipeptidase [EC:3.4.17.21]
ENSCHIG00000023747	K01301	NAALAD; N-acetylated-alpha-linked acidic dipeptidase [EC:3.4.17.21]
ENSCHIG00000007324	K01303	APEH; acylaminoacyl-peptidase [EC:3.4.19.1]
ENSCHIG00000012040	K01306	TRHDE; pyroglutamyl-peptidase II [EC:3.4.19.6]
ENSCHIG00000008343	K01309	MINDY1_2; ubiquitin carboxyl-terminal hydrolase MINDY-1/2 [EC:3.4.19.12]
ENSCHIG00000018101	K01309	MINDY1_2; ubiquitin carboxyl-terminal hydrolase MINDY-1/2 [EC:3.4.19.12]
ENSCHIG00000020471	K01312	PRSS1_2_3; trypsin [EC:3.4.21.4]
ENSCHIG00000019257	K01322	PREP; prolyl oligopeptidase [EC:3.4.21.26]
ENSCHIG00000011067	K01326	CELA1; pancreatic elastase I [EC:3.4.21.36]
ENSCHIG00000025832	K01327	ELANE; leukocyte elastase [EC:3.4.21.37]
ENSCHIG00000005559	K01328	F12; coagulation factor XII (Hageman factor) [EC:3.4.21.38]
ENSCHIG00000023479	K01330	C1R; complement component 1, r subcomponent [EC:3.4.21.41]
ENSCHIG00000012570	K01331	C1S; complement component 1, s subcomponent [EC:3.4.21.42]
ENSCHIG00000014396	K01332	C2; complement component 2 [EC:3.4.21.43]
ENSCHIG00000006982	K01333	CFI; complement factor I [EC:3.4.21.45]
ENSCHIG00000018896	K01334	CFD; complement factor D [EC:3.4.21.46]
ENSCHIG00000022942	K01335	CFB; complement factor B [EC:3.4.21.47]
ENSCHIG00000027250	K01338	lon; ATP-dependent Lon protease [EC:3.4.21.53]
ENSCHIG00000000147	K01343	PLAT; tissue plasminogen activator [EC:3.4.21.68]
ENSCHIG00000018775	K01344	PROC; protein C (activated) [EC:3.4.21.69]
ENSCHIG00000000480	K01348	PLAU; urokinase plasminogen activator [EC:3.4.21.73]
ENSCHIG00000007230	K01352	GZMA; granzyme A [EC:3.4.21.78]
ENSCHIG00000013164	K01352	GZMA; granzyme A [EC:3.4.21.78]
ENSCHIG00000016245	K01353	GZMB; granzyme B [EC:3.4.21.79]
ENSCHIG00000020332	K01353	GZMB; granzyme B [EC:3.4.21.79]
ENSCHIG00000020617	K01353	GZMB; granzyme B [EC:3.4.21.79]
ENSCHIG00000022005	K01353	GZMB; granzyme B [EC:3.4.21.79]
ENSCHIG00000010919	K01357	WNT10; wingless-type MMTV integration site family, member 10
ENSCHIG00000022853	K01357	WNT10; wingless-type MMTV integration site family, member 10
ENSCHIG00000009335	K01359	PCSK1; proprotein convertase subtilisin/kexin type 1 [EC:3.4.21.93]
ENSCHIG00000021015	K01363	CTSB; cathepsin B [EC:3.4.22.1]
ENSCHIG00000025426	K01363	CTSB; cathepsin B [EC:3.4.22.1]
ENSCHIG00000008805	K01365	CTSL; cathepsin L [EC:3.4.22.15]
ENSCHIG00000020875	K01365	CTSL; cathepsin L [EC:3.4.22.15]
ENSCHIG00000022422	K01367	CAPN1; calpain-1 [EC:3.4.22.52]
ENSCHIG00000022768	K01368	CTSS; cathepsin S [EC:3.4.22.27]
ENSCHIG00000024461	K01369	LGMN; legumain [EC:3.4.22.34]
ENSCHIG00000011574	K01371	CTSK; cathepsin K [EC:3.4.22.38]
ENSCHIG00000008496	K01372	BLMH, pepC; bleomycin hydrolase [EC:3.4.22.40]
ENSCHIG00000004885	K01373	CTSF; cathepsin F [EC:3.4.22.41]
ENSCHIG00000012419	K01376	UFSP2; UFM1-specific protease 2 [EC:3.4.22.-]
ENSCHIG00000005522	K01379	CTSD; cathepsin D [EC:3.4.23.5]
ENSCHIG00000021782	K01384	WNT11; wingless-type MMTV integration site family, member 11
ENSCHIG00000024544	K01393	NLN; neurolysin [EC:3.4.24.16]
ENSCHIG00000016293	K01398	MMP2; matrix metalloproteinase-2 (gelatinase A) [EC:3.4.24.24]
ENSCHIG00000016983	K01403	MMP9; matrix metalloproteinase-9 (gelatinase B) [EC:3.4.24.35]
ENSCHIG00000022797	K01409	KAE1, tsaD, QRI7; N6-L-threonylcarbamoyladenine synthase [EC:2.3.1.234]
ENSCHIG00000025578	K01409	KAE1, tsaD, QRI7; N6-L-threonylcarbamoyladenine synthase [EC:2.3.1.234]
ENSCHIG00000013065	K01412	PMPCA, MAS2; mitochondrial-processing peptidase subunit alpha [EC:3.4.24.64]
ENSCHIG00000026649	K01413	MMP12; matrix metalloproteinase-12 (macrophage elastase) [EC:3.4.24.65]
ENSCHIG00000012826	K01415	ECE; endothelin-converting enzyme [EC:3.4.24.71]
ENSCHIG00000023984	K01415	ECE; endothelin-converting enzyme [EC:3.4.24.71]
ENSCHIG00000008500	K01425	glsA, GLS; glutaminase [EC:3.5.1.2]
ENSCHIG00000014947	K01435	BTD; biotinidase [EC:3.5.1.12]
ENSCHIG00000025447	K01437	ASPA, aspA; aspartoacylase [EC:3.5.1.15]
ENSCHIG00000008361	K01441	ACER1_2, ASAH3; alkaline ceramidase [EC:3.5.1.23]
ENSCHIG00000023132	K01441	ACER1_2, ASAH3; alkaline ceramidase [EC:3.5.1.23]
ENSCHIG00000014336	K01443	nagA, AMDHD2; N-acetylglucosamine-6-phosphate deacetylase [EC:3.5.1.25]
ENSCHIG00000005958	K01444	AGA, aspG; N4-(beta-N-acetylglucosaminyl)-L-asparaginase [EC:3.5.1.26]
ENSCHIG00000014425	K01446	PGRP; peptidoglycan recognition protein
ENSCHIG00000017394	K01446	PGRP; peptidoglycan recognition protein
ENSCHIG00000023048	K01446	PGRP; peptidoglycan recognition protein
ENSCHIG00000027026	K01456	E3.5.1.52, NGLY1, PNG1; peptide-N4-(N-acetyl-beta-glucosaminyl)asparagine amidase [EC:3.5.1.52]
ENSCHIG00000025287	K01464	DPYS, dht, hydA; dihydropyrimidinase [EC:3.5.2.2]
ENSCHIG00000023934	K01468	hutI, AMDHD1; imidazolonepropionase [EC:3.5.2.7]
ENSCHIG00000017233	K01476	E3.5.3.1, rocF, arg; arginase [EC:3.5.3.1]
ENSCHIG00000022069	K01476	E3.5.3.1, rocF, arg; arginase [EC:3.5.3.1]
ENSCHIG00000026472	K01480	speB; agmatinase [EC:3.5.3.11]
ENSCHIG00000017651	K01481	E3.5.3.15; protein-arginine deiminase [EC:3.5.3.15]
ENSCHIG00000018607	K01481	E3.5.3.15; protein-arginine deiminase [EC:3.5.3.15]
ENSCHIG00000026752	K01482	DDAH, ddaH; dimethylargininase [EC:3.5.3.18]
ENSCHIG00000027133	K01489	cdd, CDA; cytidine deaminase [EC:3.5.4.5]
ENSCHIG00000012802	K01490	AMPD; AMP deaminase [EC:3.5.4.6]
ENSCHIG00000013332	K01490	AMPD; AMP deaminase [EC:3.5.4.6]
ENSCHIG00000010700	K01493	comEB; dCMP deaminase [EC:3.5.4.12]
ENSCHIG00000008289	K01507	ppa; inorganic pyrophosphatase [EC:3.6.1.1]
ENSCHIG00000016191	K01507	ppa; inorganic pyrophosphatase [EC:3.6.1.1]
ENSCHIG00000010567	K01509	ENTPD2; adenosinetriphosphatase [EC:3.6.1.3]
ENSCHIG00000011914	K01510	ENTPD1_3_8, CD39; apyrase [EC:3.6.1.5]
ENSCHIG00000023900	K01510	ENTPD1_3_8, CD39; apyrase [EC:3.6.1.5]
ENSCHIG00000013273	K01511	ENTPD5_6; ectonucleoside triphosphate diphosphohydrolase 5/6 [EC:3.6.1.6]
ENSCHIG00000026804	K01511	ENTPD5_6; ectonucleoside triphosphate diphosphohydrolase 5/6 [EC:3.6.1.6]
ENSCHIG00000000508	K01513	ENPP1_3, CD203; ectonucleotide pyrophosphatase/phosphodiesterase family member 1/3 [EC:3.1.4.1 3.6.1.9]
ENSCHIG00000024664	K01513	ENPP1_3, CD203; ectonucleotide pyrophosphatase/phosphodiesterase family member 1/3 [EC:3.1.4.1 3.6.1.9]
ENSCHIG00000011605	K01514	PRUNE, PPX1; exopolyphosphatase [EC:3.6.1.11]
ENSCHIG00000021768	K01517	ADPRM; manganese-dependent ADP-ribose/CDP-alcohol diphosphatase [EC:3.6.1.13 3.6.1.16 3.6.1.53]
ENSCHIG00000014634	K01519	ITPA; inosine triphosphate pyrophosphatase [EC:3.6.1.-]
ENSCHIG00000010553	K01520	dut, DUT; dUTP pyrophosphatase [EC:3.6.1.23]
ENSCHIG00000020581	K01527	EGD1, BTF3; nascent polypeptide-associated complex subunit beta
ENSCHIG00000007182	K01530	E7.6.2.1; phospholipid-translocating ATPase [EC:7.6.2.1]
ENSCHIG00000012416	K01530	E7.6.2.1; phospholipid-translocating ATPase [EC:7.6.2.1]
ENSCHIG00000016005	K01530	E7.6.2.1; phospholipid-translocating ATPase [EC:7.6.2.1]
ENSCHIG00000017299	K01530	E7.6.2.1; phospholipid-translocating ATPase [EC:7.6.2.1]
ENSCHIG00000017687	K01530	E7.6.2.1; phospholipid-translocating ATPase [EC:7.6.2.1]
ENSCHIG00000018159	K01530	E7.6.2.1; phospholipid-translocating ATPase [EC:7.6.2.1]
ENSCHIG00000019010	K01530	E7.6.2.1; phospholipid-translocating ATPase [EC:7.6.2.1]
ENSCHIG00000024331	K01530	E7.6.2.1; phospholipid-translocating ATPase [EC:7.6.2.1]
ENSCHIG00000012553	K01537	ATP2C; P-type Ca2+ transporter type 2C [EC:7.2.2.10]
ENSCHIG00000026690	K01539	ATP1A; sodium/potassium-transporting ATPase subunit alpha [EC:7.2.2.13]
ENSCHIG00000023627	K01540	ATP1B, CD298; sodium/potassium-transporting ATPase subunit beta
ENSCHIG00000019660	K01542	ATP4A; H+/K+-exchanging ATPase subunit alpha [EC:7.2.2.19]
ENSCHIG00000023218	K01544	ATP12A; non-gastric H+/K+-exchanging ATPase [EC:7.2.2.19]
ENSCHIG00000023078	K01551	arsA, ASNA1, GET3; arsenite/tail-anchored protein-transporting ATPase [EC:7.3.2.7 7.3.-.-]
ENSCHIG00000012774	K01555	FAH, fahA; fumarylacetoacetase [EC:3.7.1.2]
ENSCHIG00000009133	K01578	MLYCD; malonyl-CoA decarboxylase [EC:4.1.1.9]
ENSCHIG00000022939	K01581	E4.1.1.17, ODC1, speC, speF; ornithine decarboxylase [EC:4.1.1.17]
ENSCHIG00000027003	K01581	E4.1.1.17, ODC1, speC, speF; ornithine decarboxylase [EC:4.1.1.17]
ENSCHIG00000024430	K01583	E4.1.1.19; arginine decarboxylase [EC:4.1.1.19]
ENSCHIG00000012259	K01587	PAICS; phosphoribosylaminoimidazole carboxylase / phosphoribosylaminoimidazole-succinocarboxamide synthase [EC:4.1.1.21 6.3.2.6]
ENSCHIG00000013689	K01593	DDC, TDC; aromatic-L-amino-acid/L-tryptophan decarboxylase [EC:4.1.1.28 4.1.1.105]
ENSCHIG00000026280	K01594	CSAD; sulfinoalanine decarboxylase [EC:4.1.1.29]
ENSCHIG00000004184	K01596	E4.1.1.32, pckA, PCK; phosphoenolpyruvate carboxykinase (GTP) [EC:4.1.1.32]
ENSCHIG00000024702	K01596	E4.1.1.32, pckA, PCK; phosphoenolpyruvate carboxykinase (GTP) [EC:4.1.1.32]
ENSCHIG00000019348	K01597	MVD, mvaD; diphosphomevalonate decarboxylase [EC:4.1.1.33]
ENSCHIG00000016435	K01598	PPCDC, coaC; phosphopantothenoylcysteine decarboxylase [EC:4.1.1.36]
ENSCHIG00000020077	K01611	speD, AMD1; S-adenosylmethionine decarboxylase [EC:4.1.1.50]
ENSCHIG00000027109	K01619	deoC, DERA; deoxyribose-phosphate aldolase [EC:4.1.2.4]
ENSCHIG00000026867	K01620	ltaE; threonine aldolase [EC:4.1.2.48]
ENSCHIG00000003090	K01623	ALDO; fructose-bisphosphate aldolase, class I [EC:4.1.2.13]
ENSCHIG00000014092	K01634	SGPL1, DPL1; sphinganine-1-phosphate aldolase [EC:4.1.2.27]
ENSCHIG00000024646	K01639	E4.1.3.3, nanA, NPL; N-acetylneuraminate lyase [EC:4.1.3.3]
ENSCHIG00000026977	K01640	E4.1.3.4, HMGCL, hmgL; hydroxymethylglutaryl-CoA lyase [EC:4.1.3.4]
ENSCHIG00000025654	K01641	E2.3.3.10; hydroxymethylglutaryl-CoA synthase [EC:2.3.3.10]
ENSCHIG00000027013	K01647	CS, gltA; citrate synthase [EC:2.3.3.1]
ENSCHIG00000023185	K01648	ACLY; ATP citrate (pro-S)-lyase [EC:2.3.3.8]
ENSCHIG00000001690	K01672	CA; carbonic anhydrase [EC:4.2.1.1]
ENSCHIG00000004709	K01672	CA; carbonic anhydrase [EC:4.2.1.1]
ENSCHIG00000012435	K01672	CA; carbonic anhydrase [EC:4.2.1.1]
ENSCHIG00000019407	K01672	CA; carbonic anhydrase [EC:4.2.1.1]
ENSCHIG00000019915	K01672	CA; carbonic anhydrase [EC:4.2.1.1]
ENSCHIG00000020529	K01672	CA; carbonic anhydrase [EC:4.2.1.1]
ENSCHIG00000021493	K01672	CA; carbonic anhydrase [EC:4.2.1.1]
ENSCHIG00000024121	K01672	CA; carbonic anhydrase [EC:4.2.1.1]
ENSCHIG00000003286	K01679	E4.2.1.2B, fumC, FH; fumarate hydratase, class II [EC:4.2.1.2]
ENSCHIG00000007667	K01681	ACO, acnA; aconitate hydratase [EC:4.2.1.3]
ENSCHIG00000018278	K01689	ENO, eno; enolase [EC:4.2.1.11]
ENSCHIG00000010679	K01697	CBS; cystathionine beta-synthase [EC:4.2.1.22]
ENSCHIG00000020247	K01698	hemB, ALAD; porphobilinogen synthase [EC:4.2.1.24]
ENSCHIG00000017697	K01711	gmd, GMDS; GDPmannose 4,6-dehydratase [EC:4.2.1.47]
ENSCHIG00000010303	K01712	hutU, UROC1; urocanate hydratase [EC:4.2.1.49]
ENSCHIG00000022204	K01719	hemD, UROS; uroporphyrinogen-III synthase [EC:4.2.1.75]
ENSCHIG00000021110	K01724	PCBD, phhB; 4a-hydroxytetrahydrobiopterin dehydratase [EC:4.2.1.96]
ENSCHIG00000023788	K01724	PCBD, phhB; 4a-hydroxytetrahydrobiopterin dehydratase [EC:4.2.1.96]
ENSCHIG00000015704	K01755	argH, ASL; argininosuccinate lyase [EC:4.3.2.1]
ENSCHIG00000016369	K01756	purB, ADSL; adenylosuccinate lyase [EC:4.3.2.2]
ENSCHIG00000019727	K01758	CTH; cystathionine gamma-lyase [EC:4.4.1.1]
ENSCHIG00000018327	K01759	GLO1, gloA; lactoylglutathione lyase [EC:4.4.1.5]
ENSCHIG00000014872	K01763	SCLY; selenocysteine lyase [EC:4.4.1.16]
ENSCHIG00000015939	K01772	hemH, FECH; protoporphyrin/coproporphyrin ferrochelatase [EC:4.99.1.1 4.99.1.9]
ENSCHIG00000017628	K01783	rpe, RPE; ribulose-phosphate 3-epimerase [EC:5.1.3.1]
ENSCHIG00000014259	K01784	galE, GALE; UDP-glucose 4-epimerase [EC:5.1.3.2]
ENSCHIG00000015168	K01785	galM, GALM; aldose 1-epimerase [EC:5.1.3.3]
ENSCHIG00000014850	K01793	GLCE; heparosan-N-sulfate-glucuronate 5-epimerase [EC:5.1.3.17]
ENSCHIG00000000464	K01794	DSE; chondroitin-glucuronate 5-epimerase [EC:5.1.3.19]
ENSCHIG00000010064	K01794	DSE; chondroitin-glucuronate 5-epimerase [EC:5.1.3.19]
ENSCHIG00000011727	K01796	E5.1.99.4, AMACR, mcr; alpha-methylacyl-CoA racemase [EC:5.1.99.4]
ENSCHIG00000016122	K01810	GPI, pgi; glucose-6-phosphate isomerase [EC:5.3.1.9]
ENSCHIG00000010866	K01816	hyi, gip; hydroxypyruvate isomerase [EC:5.3.1.22]
ENSCHIG00000023940	K01823	idi, IDI; isopentenyl-diphosphate Delta-isomerase [EC:5.3.3.2]
ENSCHIG00000006002	K01830	PTGDS; prostaglandin-H2 D-isomerase [EC:5.3.99.2]
ENSCHIG00000011304	K01831	PTGIS, CYP8A; prostacyclin synthase [EC:5.3.99.4]
ENSCHIG00000005138	K01834	PGAM, gpmA; 2,3-bisphosphoglycerate-dependent phosphoglycerate mutase [EC:5.4.2.11]
ENSCHIG00000023008	K01834	PGAM, gpmA; 2,3-bisphosphoglycerate-dependent phosphoglycerate mutase [EC:5.4.2.11]
ENSCHIG00000018654	K01835	pgm; phosphoglucomutase [EC:5.4.2.2]
ENSCHIG00000017055	K01836	PGM3; phosphoacetylglucosamine mutase [EC:5.4.2.3]
ENSCHIG00000015001	K01837	BPGM; bisphosphoglycerate/phosphoglycerate mutase [EC:5.4.2.4 5.4.2.11]
ENSCHIG00000023231	K01847	MUT; methylmalonyl-CoA mutase [EC:5.4.99.2]
ENSCHIG00000013212	K01852	LSS, ERG7; lanosterol synthase [EC:5.4.99.7]
ENSCHIG00000023057	K01858	INO1, ISYNA1; myo-inositol-1-phosphate synthase [EC:5.5.1.4]
ENSCHIG00000002520	K01866	YARS, tyrS; tyrosyl-tRNA synthetase [EC:6.1.1.1]
ENSCHIG00000013499	K01867	WARS, trpS; tryptophanyl-tRNA synthetase [EC:6.1.1.2]
ENSCHIG00000023952	K01867	WARS, trpS; tryptophanyl-tRNA synthetase [EC:6.1.1.2]
ENSCHIG00000013566	K01868	TARS, thrS; threonyl-tRNA synthetase [EC:6.1.1.3]
ENSCHIG00000015264	K01868	TARS, thrS; threonyl-tRNA synthetase [EC:6.1.1.3]
ENSCHIG00000003165	K01869	LARS, leuS; leucyl-tRNA synthetase [EC:6.1.1.4]
ENSCHIG00000014949	K01869	LARS, leuS; leucyl-tRNA synthetase [EC:6.1.1.4]
ENSCHIG00000022986	K01870	IARS, ileS; isoleucyl-tRNA synthetase [EC:6.1.1.5]
ENSCHIG00000023719	K01870	IARS, ileS; isoleucyl-tRNA synthetase [EC:6.1.1.5]
ENSCHIG00000007847	K01873	VARS, valS; valyl-tRNA synthetase [EC:6.1.1.9]
ENSCHIG00000011008	K01873	VARS, valS; valyl-tRNA synthetase [EC:6.1.1.9]
ENSCHIG00000027023	K01874	MARS, metG; methionyl-tRNA synthetase [EC:6.1.1.10]
ENSCHIG00000024636	K01875	SARS, serS; seryl-tRNA synthetase [EC:6.1.1.11]
ENSCHIG00000024830	K01876	aspS; aspartyl-tRNA synthetase [EC:6.1.1.12]
ENSCHIG00000016912	K01880	GARS, glyS1; glycyl-tRNA synthetase [EC:6.1.1.14]
ENSCHIG00000018447	K01883	CARS, cysS; cysteinyl-tRNA synthetase [EC:6.1.1.16]
ENSCHIG00000022512	K01885	EARS, gltX; glutamyl-tRNA synthetase [EC:6.1.1.17]
ENSCHIG00000022953	K01886	QARS, glnS; glutaminyl-tRNA synthetase [EC:6.1.1.18]
ENSCHIG00000011962	K01887	RARS, argS; arginyl-tRNA synthetase [EC:6.1.1.19]
ENSCHIG00000018628	K01887	RARS, argS; arginyl-tRNA synthetase [EC:6.1.1.19]
ENSCHIG00000021126	K01887	RARS, argS; arginyl-tRNA synthetase [EC:6.1.1.19]
ENSCHIG00000022617	K01889	FARSA, pheS; phenylalanyl-tRNA synthetase alpha chain [EC:6.1.1.20]
ENSCHIG00000014275	K01890	FARSB, pheT; phenylalanyl-tRNA synthetase beta chain [EC:6.1.1.20]
ENSCHIG00000009904	K01892	HARS, hisS; histidyl-tRNA synthetase [EC:6.1.1.21]
ENSCHIG00000018288	K01892	HARS, hisS; histidyl-tRNA synthetase [EC:6.1.1.21]
ENSCHIG00000019297	K01893	NARS, asnS; asparaginyl-tRNA synthetase [EC:6.1.1.22]
ENSCHIG00000021744	K01895	ACSS1_2, acs; acetyl-CoA synthetase [EC:6.2.1.1]
ENSCHIG00000023954	K01895	ACSS1_2, acs; acetyl-CoA synthetase [EC:6.2.1.1]
ENSCHIG00000014654	K01896	ACSM; medium-chain acyl-CoA synthetase [EC:6.2.1.2]
ENSCHIG00000024519	K01896	ACSM; medium-chain acyl-CoA synthetase [EC:6.2.1.2]
ENSCHIG00000007360	K01897	ACSL, fadD; long-chain acyl-CoA synthetase [EC:6.2.1.3]
ENSCHIG00000021561	K01897	ACSL, fadD; long-chain acyl-CoA synthetase [EC:6.2.1.3]
ENSCHIG00000022508	K01897	ACSL, fadD; long-chain acyl-CoA synthetase [EC:6.2.1.3]
ENSCHIG00000018699	K01900	LSC2; succinyl-CoA synthetase beta subunit [EC:6.2.1.4 6.2.1.5]
ENSCHIG00000019725	K01900	LSC2; succinyl-CoA synthetase beta subunit [EC:6.2.1.4 6.2.1.5]
ENSCHIG00000016645	K01907	AACS, acsA; acetoacetyl-CoA synthetase [EC:6.2.1.16]
ENSCHIG00000023281	K01908	ACSS3, prpE; propionyl-CoA synthetase [EC:6.2.1.17]
ENSCHIG00000025428	K01915	glnA, GLUL; glutamine synthetase [EC:6.3.1.2]
ENSCHIG00000008851	K01930	FPGS; folylpolyglutamate synthase [EC:6.3.2.17]
ENSCHIG00000011973	K01931	NEUR; protein neuralized [EC:2.3.2.27]
ENSCHIG00000021908	K01931	NEUR; protein neuralized [EC:2.3.2.27]
ENSCHIG00000016234	K01934	MTHFS; 5-formyltetrahydrofolate cyclo-ligase [EC:6.3.3.2]
ENSCHIG00000026631	K01937	pyrG, CTPS; CTP synthase [EC:6.3.4.2]
ENSCHIG00000018279	K01939	purA, ADSS; adenylosuccinate synthase [EC:6.3.4.4]
ENSCHIG00000019431	K01939	purA, ADSS; adenylosuccinate synthase [EC:6.3.4.4]
ENSCHIG00000017801	K01940	argG, ASS1; argininosuccinate synthase [EC:6.3.4.5]
ENSCHIG00000019377	K01942	HLCS; biotin---protein ligase [EC:6.3.4.9 6.3.4.10 6.3.4.11 6.3.4.15]
ENSCHIG00000007275	K01950	E6.3.5.1, NADSYN1, QNS1, nadE; NAD+ synthase (glutamine-hydrolysing) [EC:6.3.5.1]
ENSCHIG00000009939	K01952	PFAS, purL; phosphoribosylformylglycinamidine synthase [EC:6.3.5.3]
ENSCHIG00000013950	K01953	asnB, ASNS; asparagine synthase (glutamine-hydrolysing) [EC:6.3.5.4]
ENSCHIG00000022161	K01958	PC, pyc; pyruvate carboxylase [EC:6.4.1.1]
ENSCHIG00000007335	K01965	PCCA, pccA; propionyl-CoA carboxylase alpha chain [EC:6.4.1.3]
ENSCHIG00000021083	K01966	PCCB, pccB; propionyl-CoA carboxylase beta chain [EC:6.4.1.3 2.1.3.15]
ENSCHIG00000023129	K01969	E6.4.1.4B; 3-methylcrotonyl-CoA carboxylase beta subunit [EC:6.4.1.4]
ENSCHIG00000018937	K01974	RTCA, rtcA; RNA 3'-terminal phosphate cyclase (ATP) [EC:6.5.1.4]
ENSCHIG00000026050	K02084	APAF1; apoptotic protease-activating factor
ENSCHIG00000019794	K02088	CDK3; cyclin-dependent kinase 3 [EC:2.7.11.22]
ENSCHIG00000020575	K02089	CDK4; cyclin-dependent kinase 4 [EC:2.7.11.22]
ENSCHIG00000025935	K02090	CDK5; cyclin-dependent kinase 5 [EC:2.7.11.22]
ENSCHIG00000011604	K02091	CDK6; cyclin-dependent kinase 6 [EC:2.7.11.22]
ENSCHIG00000011638	K02098	SPIR; spire
ENSCHIG00000025557	K02105	CTNNB1; catenin beta 1
ENSCHIG00000012236	K02127	ATPeF0B, ATP5F1, ATP4; F-type H+-transporting ATPase subunit b
ENSCHIG00000010354	K02128	ATPeF0C, ATP5G, ATP9; F-type H+-transporting ATPase subunit c
ENSCHIG00000016881	K02128	ATPeF0C, ATP5G, ATP9; F-type H+-transporting ATPase subunit c
ENSCHIG00000008581	K02132	ATPeF1A, ATP5A1, ATP1; F-type H+-transporting ATPase subunit alpha
ENSCHIG00000014708	K02132	ATPeF1A, ATP5A1, ATP1; F-type H+-transporting ATPase subunit alpha
ENSCHIG00000023373	K02135	ATPeF1E, ATP5E, ATP15; F-type H+-transporting ATPase subunit epsilon
ENSCHIG00000018328	K02136	ATPeF1G, ATP5C1, ATP3; F-type H+-transporting ATPase subunit gamma
ENSCHIG00000010079	K02137	ATPeF0O, ATP5O, ATP5; F-type H+-transporting ATPase subunit O
ENSCHIG00000026001	K02138	ATPeF0D, ATP5H, ATP7; F-type H+-transporting ATPase subunit d
ENSCHIG00000017159	K02140	ATPeFG, ATP5L, ATP20; F-type H+-transporting ATPase subunit g
ENSCHIG00000016415	K02144	ATPeV1H; V-type H+-transporting ATPase subunit H
ENSCHIG00000020509	K02145	ATPeV1A, ATP6A; V-type H+-transporting ATPase subunit A [EC:7.1.2.2]
ENSCHIG00000017558	K02146	ATPeV0D, ATP6D; V-type H+-transporting ATPase subunit d
ENSCHIG00000022236	K02146	ATPeV0D, ATP6D; V-type H+-transporting ATPase subunit d
ENSCHIG00000014286	K02147	ATPeV1B, ATP6B; V-type H+-transporting ATPase subunit B
ENSCHIG00000017272	K02148	ATPeV1C, ATP6C; V-type H+-transporting ATPase subunit C
ENSCHIG00000020177	K02149	ATPeV1D, ATP6M; V-type H+-transporting ATPase subunit D
ENSCHIG00000002972	K02150	ATPeV1E, ATP6E; V-type H+-transporting ATPase subunit E
ENSCHIG00000022809	K02150	ATPeV1E, ATP6E; V-type H+-transporting ATPase subunit E
ENSCHIG00000008493	K02151	ATPeV1F, ATP6S14; V-type H+-transporting ATPase subunit F
ENSCHIG00000015713	K02152	ATPeV1G, ATP6G; V-type H+-transporting ATPase subunit G
ENSCHIG00000011623	K02153	ATPeV0E, ATP6H; V-type H+-transporting ATPase subunit e
ENSCHIG00000014148	K02154	ATPeV0A, ATP6N; V-type H+-transporting ATPase subunit a
ENSCHIG00000023886	K02154	ATPeV0A, ATP6N; V-type H+-transporting ATPase subunit a
ENSCHIG00000023063	K02155	ATPeV0C, ATP6L; V-type H+-transporting ATPase 16kDa proteolipid subunit
ENSCHIG00000024941	K02156	AUB, PIWI; aubergine
ENSCHIG00000010291	K02157	AXIN1; axin 1
ENSCHIG00000015400	K02158	BAD; Bcl-2-antagonist of cell death
ENSCHIG00000016438	K02159	BAX; apoptosis regulator BAX
ENSCHIG00000016322	K02161	BCL2; apoptosis regulator Bcl-2
ENSCHIG00000012471	K02163	BCLW; apoptosis regulator BCL-W
ENSCHIG00000026036	K02165	DKK; dickkopf
ENSCHIG00000014291	K02166	SFRP1; secreted frizzled-related protein 1
ENSCHIG00000011982	K02178	BUB1; checkpoint serine/threonine-protein kinase [EC:2.7.11.1]
ENSCHIG00000021092	K02180	BUB3; cell cycle arrest protein BUB3
ENSCHIG00000009932	K02183	CALM; calmodulin
ENSCHIG00000011230	K02183	CALM; calmodulin
ENSCHIG00000011296	K02183	CALM; calmodulin
ENSCHIG00000021423	K02183	CALM; calmodulin
ENSCHIG00000008577	K02185	SFRP4; secreted frizzled-related protein 4
ENSCHIG00000021563	K02185	SFRP4; secreted frizzled-related protein 4
ENSCHIG00000013628	K02187	CASP3; caspase 3 [EC:3.4.22.56]
ENSCHIG00000023847	K02202	CDK7; cyclin-dependent kinase 7 [EC:2.7.11.22 2.7.11.23]
ENSCHIG00000006945	K02206	CDK2; cyclin-dependent kinase 2 [EC:2.7.11.22]
ENSCHIG00000020551	K02207	UBE2R, UBC3, CDC34; ubiquitin-conjugating enzyme E2 R [EC:2.3.2.23]
ENSCHIG00000025931	K02207	UBE2R, UBC3, CDC34; ubiquitin-conjugating enzyme E2 R [EC:2.3.2.23]
ENSCHIG00000006655	K02208	CDK8_11; cyclin-dependent kinase 8/11 [EC:2.7.11.22 2.7.11.23]
ENSCHIG00000023212	K02208	CDK8_11; cyclin-dependent kinase 8/11 [EC:2.7.11.22 2.7.11.23]
ENSCHIG00000011442	K02209	MCM5, CDC46; DNA replication licensing factor MCM5 [EC:3.6.4.12]
ENSCHIG00000027136	K02210	MCM7, CDC47; DNA replication licensing factor MCM7 [EC:3.6.4.12]
ENSCHIG00000024775	K02211	CDK9; cyclin-dependent kinase 9 [EC:2.7.11.22 2.7.11.23]
ENSCHIG00000009302	K02213	CDC6; cell division control protein 6
ENSCHIG00000026844	K02214	CDC7; cell division control protein 7 [EC:2.7.11.1]
ENSCHIG00000012535	K02219	CKS1; cyclin-dependent kinase regulatory subunit CKS1
ENSCHIG00000022256	K02219	CKS1; cyclin-dependent kinase regulatory subunit CKS1
ENSCHIG00000024678	K02222	SFRP5; secreted frizzled-related protein 5
ENSCHIG00000017027	K02223	CLOCK, KAT13D; circadian locomoter output cycles kaput protein [EC:2.3.1.48]
ENSCHIG00000010093	K02257	COX10, ctaB, cyoE; heme o synthase [EC:2.5.1.141]
ENSCHIG00000013529	K02258	COX11, ctaG; cytochrome c oxidase assembly protein subunit 11
ENSCHIG00000020850	K02259	COX15, ctaA; cytochrome c oxidase assembly protein subunit 15
ENSCHIG00000012976	K02263	COX4; cytochrome c oxidase subunit 4
ENSCHIG00000016607	K02265	COX5B; cytochrome c oxidase subunit 5b
ENSCHIG00000026106	K02266	COX6A; cytochrome c oxidase subunit 6a
ENSCHIG00000023112	K02267	COX6B; cytochrome c oxidase subunit 6b
ENSCHIG00000016010	K02270	COX7A; cytochrome c oxidase subunit 7a
ENSCHIG00000011061	K02272	COX7C; cytochrome c oxidase subunit 7c
ENSCHIG00000026992	K02272	COX7C; cytochrome c oxidase subunit 7c
ENSCHIG00000024147	K02273	COX8; cytochrome c oxidase subunit 8
ENSCHIG00000023621	K02295	CRY; cryptochrome
ENSCHIG00000008573	K02296	ARNTL, BMAL1, CYC; aryl hydrocarbon receptor nuclear translocator-like protein 1
ENSCHIG00000013938	K02308	DAXX; death-associated protein 6
ENSCHIG00000015065	K02310	DFFA, DFF45; DNA fragmentation factor, 45 kD, alpha subunit
ENSCHIG00000021506	K02321	POLA2; DNA polymerase alpha subunit B
ENSCHIG00000007241	K02324	POLE; DNA polymerase epsilon subunit 1 [EC:2.7.7.7]
ENSCHIG00000020168	K02326	POLE3; DNA polymerase epsilon subunit 3 [EC:2.7.7.7]
ENSCHIG00000018617	K02327	POLD1; DNA polymerase delta subunit 1 [EC:2.7.7.7]
ENSCHIG00000009706	K02328	POLD2; DNA polymerase delta subunit 2
ENSCHIG00000023532	K02329	FZD3; frizzled 3
ENSCHIG00000010897	K02332	POLG; DNA polymerase gamma 1 [EC:2.7.7.7]
ENSCHIG00000013841	K02349	POLQ; DNA polymerase theta [EC:2.7.7.7]
ENSCHIG00000023002	K02350	REV3L, POLZ; DNA polymerase zeta [EC:2.7.7.7]
ENSCHIG00000013014	K02353	DVL; segment polarity protein dishevelled
ENSCHIG00000015037	K02353	DVL; segment polarity protein dishevelled
ENSCHIG00000025716	K02353	DVL; segment polarity protein dishevelled
ENSCHIG00000012765	K02355	fusA, GFM, EFG; elongation factor G
ENSCHIG00000015220	K02355	fusA, GFM, EFG; elongation factor G
ENSCHIG00000013850	K02357	tsf, TSFM; elongation factor Ts
ENSCHIG00000020583	K02358	tuf, TUFM; elongation factor Tu
ENSCHIG00000015195	K02365	ESP1; separase [EC:3.4.22.49]
ENSCHIG00000009348	K02366	EXT1; glucuronyl/N-acetylglucosaminyl transferase EXT1 [EC:2.4.1.224 2.4.1.225]
ENSCHIG00000026007	K02367	EXT2; glucuronyl/N-acetylglucosaminyl transferase EXT2 [EC:2.4.1.224 2.4.1.225]
ENSCHIG00000014602	K02374	PTPN13, FAP-1; tyrosine-protein phosphatase non-receptor type 13
ENSCHIG00000021006	K02374	PTPN13, FAP-1; tyrosine-protein phosphatase non-receptor type 13
ENSCHIG00000007513	K02375	FZD5_8, fz2; frizzled 5/8
ENSCHIG00000026810	K02375	FZD5_8, fz2; frizzled 5/8
ENSCHIG00000017240	K02376	FZD6; frizzled 6
ENSCHIG00000008339	K02377	TSTA3, fcl; GDP-L-fucose synthase [EC:1.1.1.271]
ENSCHIG00000013789	K02431	fucU, FUOM; L-fucose mutarotase [EC:5.1.3.29]
ENSCHIG00000012408	K02432	FZD1_7, fz; frizzled 1/7
ENSCHIG00000017313	K02433	gatA, QRSL1; aspartyl-tRNA(Asn)/glutamyl-tRNA(Gln) amidotransferase subunit A [EC:6.3.5.6 6.3.5.7]
ENSCHIG00000020111	K02434	gatB, PET112; aspartyl-tRNA(Asn)/glutamyl-tRNA(Gln) amidotransferase subunit B [EC:6.3.5.6 6.3.5.7]
ENSCHIG00000019423	K02435	gatC, GATC; aspartyl-tRNA(Asn)/glutamyl-tRNA(Gln) amidotransferase subunit C [EC:6.3.5.6 6.3.5.7]
ENSCHIG00000026231	K02437	gcvH, GCSH; glycine cleavage system H protein
ENSCHIG00000009612	K02449	CDK10; cyclin-dependent kinase 10 [EC:2.7.11.22]
ENSCHIG00000015725	K02493	hemK, prmC, HEMK; release factor glutamine methyltransferase [EC:2.1.1.297]
ENSCHIG00000010130	K02503	HINT1, hinT, hit; histidine triad (HIT) family protein
ENSCHIG00000026325	K02513	HS2ST1; heparan sulfate 2-O-sulfotransferase HS2ST1 [EC:2.8.2.-]
ENSCHIG00000016130	K02514	HS6ST1; heparan sulfate 6-O-sulfotransferase HS6ST1 [EC:2.8.2.-]
ENSCHIG00000010297	K02519	infB, MTIF2; translation initiation factor IF-2
ENSCHIG00000025057	K02537	MAD2; mitotic spindle assembly checkpoint protein MAD2
ENSCHIG00000027012	K02539	MCL1; myeloid leukemia cell differntiation protein MCL-1
ENSCHIG00000020423	K02541	MCM3; DNA replication licensing factor MCM3 [EC:3.6.4.12]
ENSCHIG00000017476	K02542	MCM6; DNA replication licensing factor MCM6 [EC:3.6.4.12]
ENSCHIG00000026381	K02561	BOK; Bcl-2-related ovarian killer protein
ENSCHIG00000015196	K02564	nagB, GNPDA; glucosamine-6-phosphate deaminase [EC:3.5.99.6]
ENSCHIG00000022756	K02564	nagB, GNPDA; glucosamine-6-phosphate deaminase [EC:3.5.99.6]
ENSCHIG00000017289	K02576	NDST1; heparan sulfate N-deacetylase/N-sulfotransferase NDST1 [EC:3.1.1.- 2.8.2.-]
ENSCHIG00000021909	K02577	NDST2; heparan sulfate N-deacetylase/N-sulfotransferase NDST2 [EC:3.1.1.- 2.8.2.-]
ENSCHIG00000008473	K02580	NFKB1; nuclear factor NF-kappa-B p105 subunit
ENSCHIG00000007731	K02582	NGFB; nerve growth factor, beta
ENSCHIG00000019080	K02583	NGFR, TNFRSF16, CD271; tumor necrosis factor receptor superfamily member 16
ENSCHIG00000011030	K02602	CPEB, ORB; cytoplasmic polyadenylation element-binding protein
ENSCHIG00000022582	K02602	CPEB, ORB; cytoplasmic polyadenylation element-binding protein
ENSCHIG00000012895	K02603	ORC1; origin recognition complex subunit 1
ENSCHIG00000022439	K02608	ORC6; origin recognition complex subunit 6
ENSCHIG00000027172	K02620	TCF7, TCF-1; transcription factor 7
ENSCHIG00000005705	K02649	PIK3R1_2_3; phosphoinositide-3-kinase regulatory subunit alpha/beta/delta
ENSCHIG00000015779	K02649	PIK3R1_2_3; phosphoinositide-3-kinase regulatory subunit alpha/beta/delta
ENSCHIG00000021158	K02649	PIK3R1_2_3; phosphoinositide-3-kinase regulatory subunit alpha/beta/delta
ENSCHIG00000026915	K02684	PRI1; DNA primase small subunit [EC:2.7.7.102]
ENSCHIG00000019700	K02725	PSMA1; 20S proteasome subunit alpha 6 [EC:3.4.25.1]
ENSCHIG00000012524	K02726	PSMA2; 20S proteasome subunit alpha 2 [EC:3.4.25.1]
ENSCHIG00000016692	K02727	PSMA3; 20S proteasome subunit alpha 7 [EC:3.4.25.1]
ENSCHIG00000011938	K02728	PSMA4; 20S proteasome subunit alpha 3 [EC:3.4.25.1]
ENSCHIG00000009268	K02729	PSMA5; 20S proteasome subunit alpha 5 [EC:3.4.25.1]
ENSCHIG00000018832	K02731	PSMA7; 20S proteasome subunit alpha 4 [EC:3.4.25.1]
ENSCHIG00000023396	K02733	PSMB10, MECL1; 20S proteasome subunit beta 10 [EC:3.4.25.1]
ENSCHIG00000012081	K02735	PSMB3; 20S proteasome subunit beta 3 [EC:3.4.25.1]
ENSCHIG00000019694	K02736	PSMB4; 20S proteasome subunit beta 7 [EC:3.4.25.1]
ENSCHIG00000011511	K02737	PSMB5; 20S proteasome subunit beta 5 [EC:3.4.25.1]
ENSCHIG00000009624	K02738	PSMB6; 20S proteasome subunit beta 1 [EC:3.4.25.1]
ENSCHIG00000023176	K02738	PSMB6; 20S proteasome subunit beta 1 [EC:3.4.25.1]
ENSCHIG00000016023	K02739	PSMB7; 20S proteasome subunit beta 2 [EC:3.4.25.1]
ENSCHIG00000012829	K02740	PSMB8, LMP7; 20S proteasome subunit beta 8 [EC:3.4.25.1]
ENSCHIG00000021513	K02741	PSMB9, LMP2; 20S proteasome subunit beta 9 [EC:3.4.25.1]
ENSCHIG00000004808	K02833	HRAS; GTPase HRas
ENSCHIG00000012122	K02834	rbfA; ribosome-binding factor A
ENSCHIG00000007830	K02835	prfA, MTRF1, MRF1; peptide chain release factor 1
ENSCHIG00000011810	K02835	prfA, MTRF1, MRF1; peptide chain release factor 1
ENSCHIG00000026312	K02838	frr, MRRF, RRF; ribosome recycling factor
ENSCHIG00000008551	K02842	FZD9_10, CD349_50; frizzled 9/10
ENSCHIG00000020264	K02857	RHBDL1_2_3; rhomboid-related protein 1/2/3 [EC:3.4.21.105]
ENSCHIG00000026577	K02861	RIPK1, RIP1; receptor-interacting serine/threonine-protein kinase 1 [EC:2.7.11.1]
ENSCHIG00000011183	K02863	RP-L1, MRPL1, rplA; large subunit ribosomal protein L1
ENSCHIG00000027033	K02864	RP-L10, MRPL10, rplJ; large subunit ribosomal protein L10
ENSCHIG00000005268	K02865	RP-L10Ae, RPL10A; large subunit ribosomal protein L10Ae
ENSCHIG00000006454	K02865	RP-L10Ae, RPL10A; large subunit ribosomal protein L10Ae
ENSCHIG00000020543	K02868	RP-L11e, RPL11; large subunit ribosomal protein L11e
ENSCHIG00000023371	K02868	RP-L11e, RPL11; large subunit ribosomal protein L11e
ENSCHIG00000022060	K02870	RP-L12e, RPL12; large subunit ribosomal protein L12e
ENSCHIG00000024054	K02871	RP-L13, MRPL13, rplM; large subunit ribosomal protein L13
ENSCHIG00000012581	K02872	RP-L13Ae, RPL13A; large subunit ribosomal protein L13Ae
ENSCHIG00000021732	K02872	RP-L13Ae, RPL13A; large subunit ribosomal protein L13Ae
ENSCHIG00000019403	K02875	RP-L14e, RPL14; large subunit ribosomal protein L14e
ENSCHIG00000014599	K02877	RP-L15e, RPL15; large subunit ribosomal protein L15e
ENSCHIG00000012712	K02878	RP-L16, MRPL16, rplP; large subunit ribosomal protein L16
ENSCHIG00000015842	K02879	RP-L17, MRPL17, rplQ; large subunit ribosomal protein L17
ENSCHIG00000011677	K02880	RP-L17e, RPL17; large subunit ribosomal protein L17e
ENSCHIG00000023286	K02881	RP-L18, MRPL18, rplR; large subunit ribosomal protein L18
ENSCHIG00000025646	K02882	RP-L18Ae, RPL18A; large subunit ribosomal protein L18Ae
ENSCHIG00000018687	K02884	RP-L19, MRPL19, rplS; large subunit ribosomal protein L19
ENSCHIG00000010591	K02885	RP-L19e, RPL19; large subunit ribosomal protein L19e
ENSCHIG00000011685	K02885	RP-L19e, RPL19; large subunit ribosomal protein L19e
ENSCHIG00000022085	K02885	RP-L19e, RPL19; large subunit ribosomal protein L19e
ENSCHIG00000017416	K02886	RP-L2, MRPL2, rplB; large subunit ribosomal protein L2
ENSCHIG00000010545	K02887	RP-L20, MRPL20, rplT; large subunit ribosomal protein L20
ENSCHIG00000006564	K02889	RP-L21e, RPL21; large subunit ribosomal protein L21e
ENSCHIG00000021720	K02889	RP-L21e, RPL21; large subunit ribosomal protein L21e
ENSCHIG00000020523	K02890	RP-L22, MRPL22, rplV; large subunit ribosomal protein L22
ENSCHIG00000010336	K02891	RP-L22e, RPL22; large subunit ribosomal protein L22e
ENSCHIG00000024561	K02891	RP-L22e, RPL22; large subunit ribosomal protein L22e
ENSCHIG00000019330	K02893	RP-L23Ae, RPL23A; large subunit ribosomal protein L23Ae
ENSCHIG00000021757	K02893	RP-L23Ae, RPL23A; large subunit ribosomal protein L23Ae
ENSCHIG00000005169	K02894	RP-L23e, RPL23; large subunit ribosomal protein L23e
ENSCHIG00000013535	K02894	RP-L23e, RPL23; large subunit ribosomal protein L23e
ENSCHIG00000016076	K02894	RP-L23e, RPL23; large subunit ribosomal protein L23e
ENSCHIG00000011680	K02896	RP-L24e, RPL24; large subunit ribosomal protein L24e
ENSCHIG00000016405	K02896	RP-L24e, RPL24; large subunit ribosomal protein L24e
ENSCHIG00000025233	K02898	RP-L26e, RPL26; large subunit ribosomal protein L26e
ENSCHIG00000007881	K02899	RP-L27, MRPL27, rpmA; large subunit ribosomal protein L27
ENSCHIG00000015838	K02900	RP-L27Ae, RPL27A; large subunit ribosomal protein L27Ae
ENSCHIG00000019558	K02901	RP-L27e, RPL27; large subunit ribosomal protein L27e
ENSCHIG00000016968	K02902	RP-L28, MRPL28, rpmB; large subunit ribosomal protein L28
ENSCHIG00000003692	K02905	RP-L29e, RPL29; large subunit ribosomal protein L29e
ENSCHIG00000024135	K02907	RP-L30, MRPL30, rpmD; large subunit ribosomal protein L30
ENSCHIG00000011020	K02908	RP-L30e, RPL30; large subunit ribosomal protein L30e
ENSCHIG00000016945	K02908	RP-L30e, RPL30; large subunit ribosomal protein L30e
ENSCHIG00000023850	K02910	RP-L31e, RPL31; large subunit ribosomal protein L31e
ENSCHIG00000026167	K02911	RP-L32, MRPL32, rpmF; large subunit ribosomal protein L32
ENSCHIG00000011099	K02912	RP-L32e, RPL32; large subunit ribosomal protein L32e
ENSCHIG00000013243	K02915	RP-L34e, RPL34; large subunit ribosomal protein L34e
ENSCHIG00000016097	K02916	RP-L35, MRPL35, rpmI; large subunit ribosomal protein L35
ENSCHIG00000011371	K02917	RP-L35Ae, RPL35A; large subunit ribosomal protein L35Ae
ENSCHIG00000000883	K02921	RP-L37Ae, RPL37A; large subunit ribosomal protein L37Ae
ENSCHIG00000007926	K02921	RP-L37Ae, RPL37A; large subunit ribosomal protein L37Ae
ENSCHIG00000014444	K02922	RP-L37e, RPL37; large subunit ribosomal protein L37e
ENSCHIG00000025454	K02925	RP-L3e, RPL3; large subunit ribosomal protein L3e
ENSCHIG00000000516	K02926	RP-L4, MRPL4, rplD; large subunit ribosomal protein L4
ENSCHIG00000011261	K02929	RP-L44e, RPL44; large subunit ribosomal protein L44e
ENSCHIG00000011248	K02930	RP-L4e, RPL4; large subunit ribosomal protein L4e
ENSCHIG00000012421	K02930	RP-L4e, RPL4; large subunit ribosomal protein L4e
ENSCHIG00000015380	K02932	RP-L5e, RPL5; large subunit ribosomal protein L5e
ENSCHIG00000015166	K02934	RP-L6e, RPL6; large subunit ribosomal protein L6e
ENSCHIG00000003945	K02936	RP-L7Ae, RPL7A; large subunit ribosomal protein L7Ae
ENSCHIG00000010010	K02936	RP-L7Ae, RPL7A; large subunit ribosomal protein L7Ae
ENSCHIG00000008256	K02937	RP-L7e, RPL7; large subunit ribosomal protein L7e
ENSCHIG00000010307	K02937	RP-L7e, RPL7; large subunit ribosomal protein L7e
ENSCHIG00000025056	K02938	RP-L8e, RPL8; large subunit ribosomal protein L8e
ENSCHIG00000011797	K02939	RP-L9, MRPL9, rplI; large subunit ribosomal protein L9
ENSCHIG00000011416	K02940	RP-L9e, RPL9; large subunit ribosomal protein L9e
ENSCHIG00000008397	K02942	RP-LP1, RPLP1; large subunit ribosomal protein LP1
ENSCHIG00000010546	K02942	RP-LP1, RPLP1; large subunit ribosomal protein LP1
ENSCHIG00000022930	K02946	RP-S10, MRPS10, rpsJ; small subunit ribosomal protein S10
ENSCHIG00000008222	K02947	RP-S10e, RPS10; small subunit ribosomal protein S10e
ENSCHIG00000024418	K02947	RP-S10e, RPS10; small subunit ribosomal protein S10e
ENSCHIG00000026089	K02947	RP-S10e, RPS10; small subunit ribosomal protein S10e
ENSCHIG00000010925	K02949	RP-S11e, RPS11; small subunit ribosomal protein S11e
ENSCHIG00000013852	K02950	RP-S12, MRPS12, rpsL; small subunit ribosomal protein S12
ENSCHIG00000012554	K02951	RP-S12e, RPS12; small subunit ribosomal protein S12e
ENSCHIG00000015149	K02951	RP-S12e, RPS12; small subunit ribosomal protein S12e
ENSCHIG00000019947	K02957	RP-S15Ae, RPS15A; small subunit ribosomal protein S15Ae
ENSCHIG00000022493	K02957	RP-S15Ae, RPS15A; small subunit ribosomal protein S15Ae
ENSCHIG00000003203	K02958	RP-S15e, RPS15; small subunit ribosomal protein S15e
ENSCHIG00000023211	K02958	RP-S15e, RPS15; small subunit ribosomal protein S15e
ENSCHIG00000024160	K02960	RP-S16e, RPS16; small subunit ribosomal protein S16e
ENSCHIG00000023561	K02962	RP-S17e, RPS17; small subunit ribosomal protein S17e
ENSCHIG00000004461	K02963	RP-S18, MRPS18, rpsR; small subunit ribosomal protein S18
ENSCHIG00000013039	K02963	RP-S18, MRPS18, rpsR; small subunit ribosomal protein S18
ENSCHIG00000025263	K02964	RP-S18e, RPS18; small subunit ribosomal protein S18e
ENSCHIG00000017184	K02969	RP-S20e, RPS20; small subunit ribosomal protein S20e
ENSCHIG00000021516	K02970	RP-S21, MRPS21, rpsU; small subunit ribosomal protein S21
ENSCHIG00000008613	K02973	RP-S23e, RPS23; small subunit ribosomal protein S23e
ENSCHIG00000010668	K02974	RP-S24e, RPS24; small subunit ribosomal protein S24e
ENSCHIG00000020169	K02974	RP-S24e, RPS24; small subunit ribosomal protein S24e
ENSCHIG00000013743	K02977	RP-S27Ae, RPS27A; small subunit ribosomal protein S27Ae
ENSCHIG00000003580	K02978	RP-S27e, RPS27; small subunit ribosomal protein S27e
ENSCHIG00000010433	K02978	RP-S27e, RPS27; small subunit ribosomal protein S27e
ENSCHIG00000008355	K02984	RP-S3Ae, RPS3A; small subunit ribosomal protein S3Ae
ENSCHIG00000016445	K02984	RP-S3Ae, RPS3A; small subunit ribosomal protein S3Ae
ENSCHIG00000012342	K02985	RP-S3e, RPS3; small subunit ribosomal protein S3e
ENSCHIG00000009800	K02987	RP-S4e, RPS4; small subunit ribosomal protein S4e
ENSCHIG00000010444	K02987	RP-S4e, RPS4; small subunit ribosomal protein S4e
ENSCHIG00000020942	K02988	RP-S5, MRPS5, rpsE; small subunit ribosomal protein S5
ENSCHIG00000019536	K02989	RP-S5e, RPS5; small subunit ribosomal protein S5e
ENSCHIG00000011166	K02991	RP-S6e, RPS6; small subunit ribosomal protein S6e
ENSCHIG00000022475	K02996	RP-S9, MRPS9, rpsI; small subunit ribosomal protein S9
ENSCHIG00000018204	K02999	RPA1, POLR1A; DNA-directed RNA polymerase I subunit RPA1 [EC:2.7.7.6]
ENSCHIG00000014527	K03002	RPA2, POLR1B; DNA-directed RNA polymerase I subunit RPA2 [EC:2.7.7.6]
ENSCHIG00000024078	K03004	RPA43; DNA-directed RNA polymerase I subunit RPA43
ENSCHIG00000019479	K03005	RPA49, POLR1E; DNA-directed RNA polymerase I subunit RPA49
ENSCHIG00000027173	K03006	RPB1, POLR2A; DNA-directed RNA polymerase II subunit RPB1 [EC:2.7.7.6]
ENSCHIG00000011013	K03010	RPB2, POLR2B; DNA-directed RNA polymerase II subunit RPB2 [EC:2.7.7.6]
ENSCHIG00000012072	K03011	RPB3, POLR2C; DNA-directed RNA polymerase II subunit RPB3
ENSCHIG00000014151	K03013	RPB5, POLR2E; DNA-directed RNA polymerases I, II, and III subunit RPABC1
ENSCHIG00000023730	K03015	RPB7, POLR2G; DNA-directed RNA polymerase II subunit RPB7
ENSCHIG00000006695	K03016	RPB8, POLR2H; DNA-directed RNA polymerases I, II, and III subunit RPABC3
ENSCHIG00000000352	K03018	RPC1, POLR3A; DNA-directed RNA polymerase III subunit RPC1 [EC:2.7.7.6]
ENSCHIG00000020451	K03019	RPC11, POLR3K; DNA-directed RNA polymerase III subunit RPC11
ENSCHIG00000021910	K03020	RPC19, POLR1D; DNA-directed RNA polymerases I and III subunit RPAC2
ENSCHIG00000015728	K03021	RPC2, POLR3B; DNA-directed RNA polymerase III subunit RPC2 [EC:2.7.7.6]
ENSCHIG00000013984	K03022	RPC8, POLR3H; DNA-directed RNA polymerase III subunit RPC8
ENSCHIG00000022431	K03023	RPC3, POLR3C; DNA-directed RNA polymerase III subunit RPC3
ENSCHIG00000008824	K03024	RPC7, POLR3G; DNA-directed RNA polymerase III subunit RPC7
ENSCHIG00000018071	K03024	RPC7, POLR3G; DNA-directed RNA polymerase III subunit RPC7
ENSCHIG00000004352	K03027	RPC40, POLR1C; DNA-directed RNA polymerases I and III subunit RPAC1
ENSCHIG00000016997	K03028	PSMD2, RPN1; 26S proteasome regulatory subunit N1
ENSCHIG00000026247	K03030	PSMD14, RPN11, POH1; 26S proteasome regulatory subunit N11
ENSCHIG00000026335	K03031	PSMD8, RPN12; 26S proteasome regulatory subunit N12
ENSCHIG00000003582	K03033	PSMD3, RPN3; 26S proteasome regulatory subunit N3
ENSCHIG00000025493	K03035	PSMD12, RPN5; 26S proteasome regulatory subunit N5
ENSCHIG00000008139	K03036	PSMD11, RPN6; 26S proteasome regulatory subunit N6
ENSCHIG00000024309	K03037	PSMD6, RPN7; 26S proteasome regulatory subunit N7
ENSCHIG00000018478	K03038	PSMD7, RPN8; 26S proteasome regulatory subunit N8
ENSCHIG00000015309	K03061	PSMC2, RPT1; 26S proteasome regulatory subunit T1
ENSCHIG00000016963	K03062	PSMC1, RPT2; 26S proteasome regulatory subunit T2
ENSCHIG00000017291	K03064	PSMC6, RPT4; 26S proteasome regulatory subunit T4
ENSCHIG00000010249	K03065	PSMC3, RPT5; 26S proteasome regulatory subunit T5
ENSCHIG00000020396	K03066	PSMC5, RPT6; 26S proteasome regulatory subunit T6
ENSCHIG00000014776	K03068	LRP5_6; low density lipoprotein receptor-related protein 5/6
ENSCHIG00000019530	K03068	LRP5_6; low density lipoprotein receptor-related protein 5/6
ENSCHIG00000008538	K03069	FRAT1; frequently rearranged in advanced T-cell lymphomas 1
ENSCHIG00000018691	K03084	SHIP1, INPP5D; phosphatidylinositol-3,4,5-trisphosphate 5-phosphatase 1 [EC:3.1.3.86]
ENSCHIG00000002251	K03094	SKP1, CBF3D; S-phase kinase-associated protein 1
ENSCHIG00000009856	K03096	FRAT2; frequently rearranged in advanced T-cell lymphomas 2
ENSCHIG00000022551	K03097	CSNK2A; casein kinase II subunit alpha [EC:2.7.11.1]
ENSCHIG00000016486	K03098	APOD; apolipoprotein D and lipocalin family protein
ENSCHIG00000025588	K03099	SOS; son of sevenless
ENSCHIG00000000781	K03104	SRP14; signal recognition particle subunit SRP14
ENSCHIG00000026345	K03106	SRP54, ffh; signal recognition particle subunit SRP54 [EC:3.6.5.4]
ENSCHIG00000021465	K03108	SRP72; signal recognition particle subunit SRP72
ENSCHIG00000006407	K03109	SRP9; signal recognition particle subunit SRP9
ENSCHIG00000019997	K03113	EIF1, SUI1; translation initiation factor 1
ENSCHIG00000006206	K03120	TBP, tbp; transcription initiation factor TFIID TATA-box-binding protein
ENSCHIG00000011875	K03121	TFII-I, GTF2I; transcription initiation factor TFII-I
ENSCHIG00000020027	K03121	TFII-I, GTF2I; transcription initiation factor TFII-I
ENSCHIG00000002588	K03126	TAF12; transcription initiation factor TFIID subunit 12
ENSCHIG00000005868	K03127	TAF13; transcription initiation factor TFIID subunit 13
ENSCHIG00000024002	K03128	TAF2; transcription initiation factor TFIID subunit 2
ENSCHIG00000012545	K03129	TAF4; transcription initiation factor TFIID subunit 4
ENSCHIG00000027121	K03130	TAF5; transcription initiation factor TFIID subunit 5
ENSCHIG00000013919	K03131	TAF6; transcription initiation factor TFIID subunit 6
ENSCHIG00000027219	K03131	TAF6; transcription initiation factor TFIID subunit 6
ENSCHIG00000021273	K03137	TFIIE2, GTF2E2, TFA2; transcription initiation factor TFIIE subunit beta
ENSCHIG00000011986	K03138	TFIIF1, GTF2F1, TFG1; transcription initiation factor TFIIF subunit alpha
ENSCHIG00000027081	K03139	TFIIF2, GTF2F2, TFG2; transcription initiation factor TFIIF subunit beta [EC:3.6.4.12]
ENSCHIG00000014725	K03141	TFIIH1, GTF2H1, TFB1; transcription initiation factor TFIIH subunit 1
ENSCHIG00000012368	K03142	TFIIH2, GTF2H2, SSL1; transcription initiation factor TFIIH subunit 2
ENSCHIG00000022533	K03144	TFIIH4, GTF2H4, TFB2; transcription initiation factor TFIIH subunit 4
ENSCHIG00000014650	K03145	TFIIS; transcription elongation factor S-II
ENSCHIG00000016911	K03145	TFIIS; transcription elongation factor S-II
ENSCHIG00000022556	K03145	TFIIS; transcription elongation factor S-II
ENSCHIG00000010689	K03155	TIMELESS; timeless
ENSCHIG00000008732	K03156	TNF, TNFA; tumor necrosis factor superfamily, member 2
ENSCHIG00000018311	K03157	LTB, TNFC; lymphotoxin beta (TNF superfamily, member 3)
ENSCHIG00000012735	K03158	TNFRSF1A, TNFR1, CD120a; tumor necrosis factor receptor superfamily member 1A
ENSCHIG00000022975	K03159	TNFRSF3, LTBR; lymphotoxin beta receptor TNFR superfamily member 3
ENSCHIG00000012498	K03164	TOP2; DNA topoisomerase II [EC:5.6.2.2]
ENSCHIG00000021091	K03164	TOP2; DNA topoisomerase II [EC:5.6.2.2]
ENSCHIG00000024921	K03171	TRADD; tumor necrosis factor receptor type 1-associated DEATH domain protein
ENSCHIG00000026463	K03174	TRAF3; TNF receptor-associated factor 3
ENSCHIG00000015888	K03175	TRAF6; TNF receptor-associated factor 6 [EC:2.3.2.27]
ENSCHIG00000020860	K03211	ETV6_7, yan; ETS translocation variant 6/7
ENSCHIG00000022144	K03213	NKD; naked cuticle
ENSCHIG00000022345	K03217	yidC, spoIIIJ, OXA1, ccfA; YidC/Oxa1 family membrane protein insertase
ENSCHIG00000008066	K03231	EEF1A; elongation factor 1-alpha
ENSCHIG00000010087	K03231	EEF1A; elongation factor 1-alpha
ENSCHIG00000016589	K03231	EEF1A; elongation factor 1-alpha
ENSCHIG00000026794	K03232	EEF1B; elongation factor 1-beta
ENSCHIG00000011066	K03237	EIF2S1; translation initiation factor 2 subunit 1
ENSCHIG00000011707	K03238	EIF2S2; translation initiation factor 2 subunit 2
ENSCHIG00000026317	K03238	EIF2S2; translation initiation factor 2 subunit 2
ENSCHIG00000015301	K03239	EIF2B1; translation initiation factor eIF-2B subunit alpha
ENSCHIG00000015663	K03241	EIF2B3; translation initiation factor eIF-2B subunit gamma
ENSCHIG00000027106	K03243	EIF5B; translation initiation factor 5B
ENSCHIG00000023791	K03245	EIF3J; translation initiation factor 3 subunit J
ENSCHIG00000021616	K03246	EIF3I; translation initiation factor 3 subunit I
ENSCHIG00000011690	K03247	EIF3H; translation initiation factor 3 subunit H
ENSCHIG00000013441	K03249	EIF3F; translation initiation factor 3 subunit F
ENSCHIG00000004339	K03250	EIF3E, INT6; translation initiation factor 3 subunit E
ENSCHIG00000012106	K03251	EIF3D; translation initiation factor 3 subunit D
ENSCHIG00000024795	K03252	EIF3C; translation initiation factor 3 subunit C
ENSCHIG00000016597	K03254	EIF3A; translation initiation factor 3 subunit A
ENSCHIG00000004152	K03255	TIF31, CLU1; protein TIF31
ENSCHIG00000010338	K03256	TRM6, GCD10; tRNA (adenine58-N1)-methyltransferase non-catalytic subunit
ENSCHIG00000022153	K03257	EIF4A; translation initiation factor 4A
ENSCHIG00000006321	K03259	EIF4E; translation initiation factor 4E
ENSCHIG00000009550	K03259	EIF4E; translation initiation factor 4E
ENSCHIG00000021560	K03259	EIF4E; translation initiation factor 4E
ENSCHIG00000009775	K03260	EIF4G; translation initiation factor 4G
ENSCHIG00000017894	K03260	EIF4G; translation initiation factor 4G
ENSCHIG00000018873	K03260	EIF4G; translation initiation factor 4G
ENSCHIG00000021283	K03262	EIF5; translation initiation factor 5
ENSCHIG00000025365	K03263	EIF5A; translation initiation factor 5A
ENSCHIG00000011324	K03264	EIF6; translation initiation factor 6
ENSCHIG00000009685	K03265	ETF1, ERF1; peptide chain release factor subunit 1
ENSCHIG00000009274	K03267	ERF3, GSPT; peptide chain release factor subunit 3
ENSCHIG00000010529	K03283	HSPA1s; heat shock 70kDa protein 1/2/6/8
ENSCHIG00000022996	K03283	HSPA1s; heat shock 70kDa protein 1/2/6/8
ENSCHIG00000025411	K03283	HSPA1s; heat shock 70kDa protein 1/2/6/8
ENSCHIG00000019959	K03327	TC.MATE, SLC47A, norM, mdtK, dinF; multidrug resistance protein, MATE family
ENSCHIG00000022966	K03327	TC.MATE, SLC47A, norM, mdtK, dinF; multidrug resistance protein, MATE family
ENSCHIG00000026975	K03331	DCXR; L-xylulose reductase [EC:1.1.1.10]
ENSCHIG00000014204	K03334	IL4I1; L-amino-acid oxidase [EC:1.4.3.2]
ENSCHIG00000010810	K03341	SEPSECS; O-phospho-L-seryl-tRNASec:L-selenocysteinyl-tRNA synthase [EC:2.9.1.2]
ENSCHIG00000010456	K03344	IDAX; Dvl-binding protein IDAX
ENSCHIG00000018521	K03345	SENP2, AXAM2; sentrin-specific protease 2 (axin associating molecule) [EC:3.4.22.68]
ENSCHIG00000025826	K03347	CUL1, CDC53; cullin 1
ENSCHIG00000004602	K03349	APC2; anaphase-promoting complex subunit 2
ENSCHIG00000019893	K03350	APC3, CDC27; anaphase-promoting complex subunit 3
ENSCHIG00000023609	K03351	APC4; anaphase-promoting complex subunit 4
ENSCHIG00000025087	K03355	APC8, CDC23; anaphase-promoting complex subunit 8
ENSCHIG00000015807	K03362	FBXW1_11, BTRC, beta-TRCP; F-box and WD-40 domain protein 1/11
ENSCHIG00000020079	K03363	CDC20; cell division cycle 20, cofactor of APC complex
ENSCHIG00000014824	K03364	CDH1; cell division cycle 20-like protein 1, cofactor of APC complex
ENSCHIG00000021591	K03370	SIAT9; lactosylceramide alpha-2,3-sialyltransferase (sialyltransferase 9) [EC:2.4.99.9]
ENSCHIG00000022129	K03371	SIAT8A; alpha-N-acetyl-neuraminate alpha-2,8-sialyltransferase (sialyltransferase 8A) [EC:2.4.99.8]
ENSCHIG00000012912	K03374	SIAT7D, ST6GalNAc IV; N-acetylgalactosaminide alpha-2,6-sialyltransferase (sialyltransferase 7D) [EC:2.4.99.7]
ENSCHIG00000000945	K03376	SIAT7F, ST6GalNAc VI; N-acetylgalactosaminide alpha-2,6-sialyltransferase (sialyltransferase 7F) [EC:2.4.99.-]
ENSCHIG00000010702	K03377	CASD1; N-acetylneuraminate 9-O-acetyltransferase [EC:2.3.1.45]
ENSCHIG00000024616	K03424	tatD; TatD DNase family protein [EC:3.1.21.-]
ENSCHIG00000023629	K03426	E3.6.1.22, NUDT12, nudC; NAD+ diphosphatase [EC:3.6.1.22]
ENSCHIG00000015867	K03439	trmB, METTL1, TRM8; tRNA (guanine-N7-)-methyltransferase [EC:2.1.1.33]
ENSCHIG00000011075	K03443	PANX1; pannexin 1
ENSCHIG00000009119	K03447	SLC37A3; MFS transporter, OPA family, solute carrier family 37 (glycerol-3-phosphate transporter), member 3
ENSCHIG00000008235	K03454	SLC25A46; solute carrier family 25, member 46
ENSCHIG00000019958	K03456	PPP2R1; serine/threonine-protein phosphatase 2A regulatory subunit A
ENSCHIG00000023496	K03456	PPP2R1; serine/threonine-protein phosphatase 2A regulatory subunit A
ENSCHIG00000013574	K03462	NAMPT; nicotinamide phosphoribosyltransferase [EC:2.4.2.12]
ENSCHIG00000025600	K03479	SIAT7A, ST6GalNAc I; alpha-N-acetylgalactosaminide alpha-2,6-sialyltransferase (sialyltransferase 7A) [EC:2.4.99.3]
ENSCHIG00000012632	K03494	SIAT4C; beta-galactoside alpha-2,3-sialyltransferase (sialyltransferase 4C) [EC:2.4.99.4]
ENSCHIG00000014134	K03495	gidA, mnmG, MTO1; tRNA uridine 5-carboxymethylaminomethyl modification enzyme
ENSCHIG00000023669	K03504	POLD3; DNA polymerase delta subunit 3
ENSCHIG00000023864	K03506	POLE4; DNA polymerase epsilon subunit 4 [EC:2.7.7.7]
ENSCHIG00000010328	K03509	POLH; DNA polymerase eta [EC:2.7.7.7]
ENSCHIG00000008105	K03511	POLK; DNA polymerase kappa [EC:2.7.7.7]
ENSCHIG00000017328	K03514	PAPD5_7, TRF4; non-canonical poly(A) RNA polymerase PAPD5/7 [EC:2.7.7.19]
ENSCHIG00000012748	K03515	REV1; DNA repair protein REV1 [EC:2.7.7.-]
ENSCHIG00000016559	K03521	fixA, etfB; electron transfer flavoprotein beta subunit
ENSCHIG00000015575	K03522	fixB, etfA; electron transfer flavoprotein alpha subunit
ENSCHIG00000016402	K03537	POP5; ribonuclease P/MRP protein subunit POP5 [EC:3.1.26.5]
ENSCHIG00000015983	K03540	RPR2, RPP21; ribonuclease P protein subunit RPR2 [EC:3.1.26.5]
ENSCHIG00000023656	K03544	clpX, CLPX; ATP-dependent Clp protease ATP-binding subunit ClpX
ENSCHIG00000011167	K03575	mutY; A/G-specific adenine glycosylase [EC:3.2.2.31]
ENSCHIG00000001919	K03593	mrp, NUBPL; ATP-binding protein involved in chromosome partitioning
ENSCHIG00000024194	K03593	mrp, NUBPL; ATP-binding protein involved in chromosome partitioning
ENSCHIG00000021850	K03595	era, ERAL1; GTPase
ENSCHIG00000013646	K03626	EGD2, NACA; nascent polypeptide-associated complex subunit alpha
ENSCHIG00000014594	K03635	MOCS2B, moaE; molybdopterin synthase catalytic subunit [EC:2.8.1.12]
ENSCHIG00000020536	K03635	MOCS2B, moaE; molybdopterin synthase catalytic subunit [EC:2.8.1.12]
ENSCHIG00000014912	K03644	lipA, LIAS, LIP1, LIP5; lipoyl synthase [EC:2.8.1.8]
ENSCHIG00000008245	K03648	UNG, UDG; uracil-DNA glycosylase [EC:3.2.2.27]
ENSCHIG00000011330	K03652	MPG; DNA-3-methyladenine glycosylase [EC:3.2.2.21]
ENSCHIG00000022673	K03660	OGG1; N-glycosylase/DNA lyase [EC:3.2.2.- 4.2.99.18]
ENSCHIG00000017292	K03661	ATPeV0B, ATP6F; V-type H+-transporting ATPase 21kDa proteolipid subunit
ENSCHIG00000017986	K03671	trxA; thioredoxin 1
ENSCHIG00000020673	K03676	grxC, GLRX, GLRX2; glutaredoxin 3
ENSCHIG00000018091	K03678	RRP45, EXOSC9; exosome complex component RRP45
ENSCHIG00000021398	K03679	RRP4, EXOSC2; exosome complex component RRP4
ENSCHIG00000025344	K03680	EIF2B4; translation initiation factor eIF-2B subunit delta
ENSCHIG00000018466	K03681	RRP40, EXOSC3; exosome complex component RRP40
ENSCHIG00000022226	K03685	rnc, DROSHA, RNT1; ribonuclease III [EC:3.1.26.3]
ENSCHIG00000026236	K03687	GRPE; molecular chaperone GrpE
ENSCHIG00000000514	K03691	POFUT; peptide-O-fucosyltransferase [EC:2.4.1.221]
ENSCHIG00000021140	K03691	POFUT; peptide-O-fucosyltransferase [EC:2.4.1.221]
ENSCHIG00000017450	K03728	NR1D1; nuclear receptor subfamily 1 group D member 1
ENSCHIG00000014557	K03729	BHLHB2, DEC1; class B basic helix-loop-helix protein 2
ENSCHIG00000024108	K03730	BHLHB3, DEC2; class B basic helix-loop-helix protein 3
ENSCHIG00000007874	K03766	B3GNT5; beta-1,3-N-acetylglucosaminyltransferase 5 [EC:2.4.1.206]
ENSCHIG00000019546	K03768	PPIB, ppiB; peptidyl-prolyl cis-trans isomerase B (cyclophilin B) [EC:5.2.1.8]
ENSCHIG00000021227	K03781	katE, CAT, catB, srpA; catalase [EC:1.11.1.6]
ENSCHIG00000010402	K03783	punA, PNP; purine-nucleoside phosphorylase [EC:2.4.2.1]
ENSCHIG00000011975	K03783	punA, PNP; purine-nucleoside phosphorylase [EC:2.4.2.1]
ENSCHIG00000021838	K03833	selB, EEFSEC; selenocysteine-specific elongation factor
ENSCHIG00000012024	K03842	ALG1; beta-1,4-mannosyltransferase [EC:2.4.1.142]
ENSCHIG00000014578	K03843	ALG2; alpha-1,3/alpha-1,6-mannosyltransferase [EC:2.4.1.132 2.4.1.257]
ENSCHIG00000024968	K03844	ALG11; alpha-1,2-mannosyltransferase [EC:2.4.1.131]
ENSCHIG00000018512	K03847	ALG12; alpha-1,6-mannosyltransferase [EC:2.4.1.260]
ENSCHIG00000019050	K03848	ALG6; alpha-1,3-glucosyltransferase [EC:2.4.1.267]
ENSCHIG00000015388	K03849	ALG8; alpha-1,3-glucosyltransferase [EC:2.4.1.265]
ENSCHIG00000023413	K03850	ALG10; alpha-1,2-glucosyltransferase [EC:2.4.1.256]
ENSCHIG00000018229	K03853	CAPN2; calpain-2 [EC:3.4.22.53]
ENSCHIG00000019126	K03858	PIGH, GPI15; phosphatidylinositol N-acetylglucosaminyltransferase subunit H
ENSCHIG00000011675	K03859	PIGC, GPI2; phosphatidylinositol N-acetylglucosaminyltransferase subunit C
ENSCHIG00000008174	K03869	CUL3; cullin 3
ENSCHIG00000012681	K03870	CUL2; cullin 2
ENSCHIG00000023784	K03871	VHL; von Hippel-Lindau disease tumor supressor
ENSCHIG00000015198	K03872	ELOC, TCEB1; elongin-C
ENSCHIG00000003423	K03877	B3GALT5; beta-1,3-galactosyltransferase 5 [EC:2.4.1.-]
ENSCHIG00000000027	K03882	ND4L; NADH-ubiquinone oxidoreductase chain 4L [EC:7.1.1.2]
ENSCHIG00000011373	K03898	KNG, BK; kininogen
ENSCHIG00000012979	K03900	VWF; von Willebrand factor
ENSCHIG00000019946	K03901	F3, CD142; coagulation factor III (tissue factor)
ENSCHIG00000015374	K03902	F5; coagulation factor V (labile factor)
ENSCHIG00000018253	K03903	FGA; fibrinogen alpha chain
ENSCHIG00000010975	K03907	THBD, CD141; thrombomodulin
ENSCHIG00000010494	K03908	PROS1; protein S
ENSCHIG00000007459	K03909	TFPI; tissue factor pathway inhibitor
ENSCHIG00000022474	K03914	F2R, PAR1; coagulation factor II (thrombin) receptor
ENSCHIG00000019722	K03916	BDKRB2; bradykinin receptor B2
ENSCHIG00000020633	K03917	F13A1; coagulation factor XIII A1 polypeptide [EC:2.3.2.13]
ENSCHIG00000019303	K03927	CES2; carboxylesterase 2 [EC:3.1.1.1 3.1.1.84 3.1.1.56]
ENSCHIG00000014971	K03934	NDUFS1; NADH dehydrogenase (ubiquinone) Fe-S protein 1 [EC:7.1.1.2 1.6.99.3]
ENSCHIG00000024319	K03935	NDUFS2; NADH dehydrogenase (ubiquinone) Fe-S protein 2 [EC:7.1.1.2 1.6.99.3]
ENSCHIG00000017760	K03936	NDUFS3; NADH dehydrogenase (ubiquinone) Fe-S protein 3 [EC:7.1.1.2 1.6.99.3]
ENSCHIG00000025172	K03937	NDUFS4; NADH dehydrogenase (ubiquinone) Fe-S protein 4
ENSCHIG00000020281	K03939	NDUFS6; NADH dehydrogenase (ubiquinone) Fe-S protein 6
ENSCHIG00000013308	K03941	NDUFS8; NADH dehydrogenase (ubiquinone) Fe-S protein 8 [EC:7.1.1.2 1.6.99.3]
ENSCHIG00000022888	K03942	NDUFV1; NADH dehydrogenase (ubiquinone) flavoprotein 1 [EC:7.1.1.2 1.6.99.3]
ENSCHIG00000025996	K03944	NDUFV3; NADH dehydrogenase (ubiquinone) flavoprotein 3
ENSCHIG00000014929	K03948	NDUFA4; NADH dehydrogenase (ubiquinone) 1 alpha subcomplex subunit 4
ENSCHIG00000009187	K03951	NDUFA7; NADH dehydrogenase (ubiquinone) 1 alpha subcomplex subunit 7
ENSCHIG00000011229	K03955	NDUFAB1; NADH dehydrogenase (ubiquinone) 1 alpha/beta subcomplex 1, acyl-carrier protein
ENSCHIG00000024994	K03961	NDUFB5; NADH dehydrogenase (ubiquinone) 1 beta subcomplex subunit 5
ENSCHIG00000027260	K03962	NDUFB6; NADH dehydrogenase (ubiquinone) 1 beta subcomplex subunit 6
ENSCHIG00000024798	K03978	engB; GTP-binding protein
ENSCHIG00000019551	K03979	obgE, cgtA, MTG2; GTPase [EC:3.6.5.-]
ENSCHIG00000020858	K03982	SERPINE1, PAI1; plasminogen activator inhibitor 1
ENSCHIG00000022372	K03983	SERPINF2, AAP; alpha-2-antiplasmin
ENSCHIG00000021633	K03984	SERPINA1, AAT; alpha-1-antitrypsin
ENSCHIG00000023354	K03989	C4; complement component 4
ENSCHIG00000008320	K03990	C3; complement component 3
ENSCHIG00000012728	K03990	C3; complement component 3
ENSCHIG00000016667	K03992	MASP1; mannan-binding lectin serine protease 1 [EC:3.4.21.-]
ENSCHIG00000017743	K03993	MASP2; mannan-binding lectin serine protease 2 [EC:3.4.21.104]
ENSCHIG00000011041	K03994	C5; complement component 5
ENSCHIG00000021210	K03995	C6; complement component 6
ENSCHIG00000014791	K04000	C9; complement component 9
ENSCHIG00000019405	K04001	SERPING1, C1INH; C1 inhibitor
ENSCHIG00000022712	K04002	C4BPA; complement component 4 binding protein alpha
ENSCHIG00000014905	K04003	C4BPB; complement component 4 binding protein beta
ENSCHIG00000010286	K04004	CFH, HF1; complement factor H
ENSCHIG00000020774	K04004	CFH, HF1; complement factor H
ENSCHIG00000017205	K04006	DAF, CD55; decay accelerating factor
ENSCHIG00000021641	K04007	CD46, MCP; membrane cofactor protein
ENSCHIG00000003258	K04008	CD59; CD59 antigen
ENSCHIG00000024144	K04012	CR2, CD21; complement receptor type 2
ENSCHIG00000019832	K04043	dnaK, HSPA9; molecular chaperone DnaK
ENSCHIG00000004382	K04077	groEL, HSPD1; chaperonin GroEL
ENSCHIG00000005111	K04119	AKR1C3; aldo-keto reductase family 1 member C3 [EC:1.1.1.51 1.1.1.188 1.1.1.213 1.1.1.357]
ENSCHIG00000011337	K04119	AKR1C3; aldo-keto reductase family 1 member C3 [EC:1.1.1.51 1.1.1.188 1.1.1.213 1.1.1.357]
ENSCHIG00000011701	K04119	AKR1C3; aldo-keto reductase family 1 member C3 [EC:1.1.1.51 1.1.1.188 1.1.1.213 1.1.1.357]
ENSCHIG00000012276	K04119	AKR1C3; aldo-keto reductase family 1 member C3 [EC:1.1.1.51 1.1.1.188 1.1.1.213 1.1.1.357]
ENSCHIG00000013258	K04119	AKR1C3; aldo-keto reductase family 1 member C3 [EC:1.1.1.51 1.1.1.188 1.1.1.213 1.1.1.357]
ENSCHIG00000015228	K04119	AKR1C3; aldo-keto reductase family 1 member C3 [EC:1.1.1.51 1.1.1.188 1.1.1.213 1.1.1.357]
ENSCHIG00000015607	K04119	AKR1C3; aldo-keto reductase family 1 member C3 [EC:1.1.1.51 1.1.1.188 1.1.1.213 1.1.1.357]
ENSCHIG00000016878	K04119	AKR1C3; aldo-keto reductase family 1 member C3 [EC:1.1.1.51 1.1.1.188 1.1.1.213 1.1.1.357]
ENSCHIG00000021527	K04119	AKR1C3; aldo-keto reductase family 1 member C3 [EC:1.1.1.51 1.1.1.188 1.1.1.213 1.1.1.357]
ENSCHIG00000026316	K04119	AKR1C3; aldo-keto reductase family 1 member C3 [EC:1.1.1.51 1.1.1.188 1.1.1.213 1.1.1.357]
ENSCHIG00000012488	K04129	CHRM1; muscarinic acetylcholine receptor M1
ENSCHIG00000021001	K04135	ADRA1A; adrenergic receptor alpha-1A
ENSCHIG00000002663	K04138	ADRA2A; adrenergic receptor alpha-2A
ENSCHIG00000015811	K04139	ADRA2B; adrenergic receptor alpha-2B
ENSCHIG00000008674	K04140	ADRA2C; adrenergic receptor alpha-2C
ENSCHIG00000004216	K04145	DRD2; dopamine receptor D2
ENSCHIG00000012387	K04149	HRH1; histamine receptor H1
ENSCHIG00000022097	K04150	HRH2; histamine receptor H2
ENSCHIG00000006885	K04151	HRH3; histamine receptor H3
ENSCHIG00000022715	K04160	HTR4; 5-hydroxytryptamine receptor 4
ENSCHIG00000019661	K04161	HTR5; 5-hydroxytryptamine receptor 5
ENSCHIG00000018265	K04163	HTR7; 5-hydroxytryptamine receptor 7
ENSCHIG00000011470	K04166	AGTR1; angiotensin II receptor type 1
ENSCHIG00000003475	K04171	C5AR2, GPR77; C5a anaphylatoxin chemotactic receptor 2
ENSCHIG00000023743	K04174	APLNR; apelin receptor
ENSCHIG00000012101	K04175	CXCR1, IL8RA, CD181; C-X-C chemokine receptor type 1
ENSCHIG00000020041	K04179	CCR4, CD194; C-C chemokine receptor type 4
ENSCHIG00000025437	K04181	CCR6, CD196; C-C chemokine receptor type 6
ENSCHIG00000019145	K04182	CCR7, CD197; C-C chemokine receptor type 7
ENSCHIG00000006778	K04183	CCR8, CDw198; C-C chemokine receptor type 8
ENSCHIG00000006150	K04185	CCR10; C-C chemokine receptor type 10
ENSCHIG00000008163	K04186	ACKR4, CCRL1, CCR11; atypical chemokine receptor 4
ENSCHIG00000011514	K04187	ACKR2, CCBP2; atypical chemokine receptor 2
ENSCHIG00000013798	K04189	CXCR4, CD184; C-X-C chemokine receptor type 4
ENSCHIG00000001053	K04191	CXCR6, CD186; C-X-C chemokine receptor type 6
ENSCHIG00000007770	K04192	CX3CR1; CX3C chemokine receptor 1
ENSCHIG00000018219	K04195	CCKBR; cholecystokinin B receptor
ENSCHIG00000019737	K04197	EDNRA; endothelin receptor type A
ENSCHIG00000012293	K04204	NPY1R; neuropeptide Y receptor type 1
ENSCHIG00000018601	K04206	NPY4R; neuropeptide Y receptor type 4
ENSCHIG00000008409	K04218	SSTR2; somatostatin receptor 2
ENSCHIG00000020386	K04224	TACR3; tachykinin receptor 3
ENSCHIG00000016511	K04226	AVPR1A; arginine vasopressin receptor 1A
ENSCHIG00000017151	K04231	GALR2; galanin receptor 2
ENSCHIG00000023810	K04232	GALR3; galanin receptor 3
ENSCHIG00000026366	K04234	F2RL1, PAR2; coagulation factor II (thrombin) receptor-like 1
ENSCHIG00000002096	K04235	F2RL2, PAR3; coagulation factor II (thrombin) receptor-like 2
ENSCHIG00000014315	K04236	F2RL3, PAR4; coagulation factor II (thrombin) receptor-like 3
ENSCHIG00000007723	K04237	PARD3; partitioning defective protein 3
ENSCHIG00000019203	K04237	PARD3; partitioning defective protein 3
ENSCHIG00000012176	K04241	UTS2R; urotensin 2 receptor
ENSCHIG00000010542	K04244	GPR37L1, ETBRLP2; prosaposin receptor
ENSCHIG00000010428	K04245	CMKLR1; chemokine-like receptor 1
ENSCHIG00000010836	K04257	OLFR; olfactory receptor
ENSCHIG00000011821	K04257	OLFR; olfactory receptor
ENSCHIG00000026600	K04259	PTGER2; prostaglandin E receptor 2
ENSCHIG00000020559	K04260	PTGER3; prostaglandin E receptor 3
ENSCHIG00000023835	K04261	PTGER4; prostaglandin E receptor 4
ENSCHIG00000016612	K04263	PTGIR; prostacyclin receptor
ENSCHIG00000016712	K04267	ADORA2B; adenosine receptor A2b
ENSCHIG00000009730	K04269	P2RY2; P2Y purinoceptor 2
ENSCHIG00000008918	K04270	P2RY1; P2Y purinoceptor 1
ENSCHIG00000019533	K04273	LPAR6, P2RY5; lysophosphatidic acid receptor 6
ENSCHIG00000004634	K04276	CXCR8, GPR35; C-X-C chemokine receptor type 8
ENSCHIG00000012038	K04279	PTAFR; platelet-activating factor receptor
ENSCHIG00000027166	K04281	CAST; calpastatin
ENSCHIG00000008675	K04288	S1PR1, EDG1, CD363; sphingosine 1-phosphate receptor 1
ENSCHIG00000021183	K04289	LPAR1, EDG2; lysophosphatidic acid receptor 1
ENSCHIG00000026267	K04291	LPAR2, EDG4; lysophosphatidic acid receptor 2
ENSCHIG00000010178	K04292	S1PR2, EDG5; sphingosine 1-phosphate receptor 2
ENSCHIG00000012284	K04293	S1PR4, EDG6; sphingosine 1-phosphate receptor 4
ENSCHIG00000017316	K04294	LPAR3, EDG7; lysophosphatidic acid receptor 3
ENSCHIG00000013199	K04295	S1PR5, EDG8; sphingosine 1-phosphate receptor 5
ENSCHIG00000008260	K04296	LTB4R1; leukotriene B4 receptor 1
ENSCHIG00000006724	K04297	LTB4R2; leukotriene B4 receptor 2
ENSCHIG00000007322	K04299	P2RY14; P2Y purinoceptor 14
ENSCHIG00000002856	K04304	CXCR7, ACKR3, RDC1; C-X-C chemokine receptor type 7 (atypical chemokine receptor 3)
ENSCHIG00000012779	K04305	EBI2; Epstein-Barr virus induced gene 2
ENSCHIG00000018190	K04308	LGR5, GPR49; leucine-rich repeat-containing G protein-coupled receptor 5
ENSCHIG00000027214	K04309	LGR4, GPR48; leucine-rich repeat-containing G protein-coupled receptor 4
ENSCHIG00000007661	K04310	GPR1; G protein-coupled receptor 1
ENSCHIG00000004717	K04316	GPR19; G protein-coupled receptor 19
ENSCHIG00000007995	K04321	GPR63; G protein-coupled receptor 63
ENSCHIG00000026627	K04326	FFAR3, GPR41; free fatty acid receptor 3
ENSCHIG00000025921	K04332	PTGDR; prostaglandin D2 receptor
ENSCHIG00000024391	K04345	PKA; protein kinase A [EC:2.7.11.11]
ENSCHIG00000024235	K04346	GNA12; guanine nucleotide-binding protein subunit alpha-12
ENSCHIG00000015506	K04347	GNG12; guanine nucleotide-binding protein G(I)/G(S)/G(O) subunit gamma-12
ENSCHIG00000014803	K04348	PPP3C, CNA; serine/threonine-protein phosphatase 2B catalytic subunit [EC:3.1.3.16]
ENSCHIG00000010166	K04350	RASGRP1; RAS guanyl-releasing protein 1
ENSCHIG00000014118	K04352	RASA1, RASGAP; Ras GTPase-activating protein 1
ENSCHIG00000007473	K04354	PPP2R2; serine/threonine-protein phosphatase 2A regulatory subunit B
ENSCHIG00000014943	K04354	PPP2R2; serine/threonine-protein phosphatase 2A regulatory subunit B
ENSCHIG00000016344	K04354	PPP2R2; serine/threonine-protein phosphatase 2A regulatory subunit B
ENSCHIG00000011455	K04358	FGF; fibroblast growth factor
ENSCHIG00000015574	K04358	FGF; fibroblast growth factor
ENSCHIG00000020738	K04358	FGF; fibroblast growth factor
ENSCHIG00000015262	K04359	PDGFA; platelet-derived growth factor subunit A
ENSCHIG00000023122	K04360	NTRK2, TRKB; neurotrophic tyrosine kinase receptor type 2 [EC:2.7.10.1]
ENSCHIG00000020547	K04361	EGFR, ERBB1; epidermal growth factor receptor [EC:2.7.10.1]
ENSCHIG00000011006	K04362	FGFR1, CD331; fibroblast growth factor receptor 1 [EC:2.7.10.1]
ENSCHIG00000005194	K04363	PDGFRA, CD140A; platelet-derived growth factor receptor alpha [EC:2.7.10.1]
ENSCHIG00000016061	K04364	GRB2; growth factor receptor-binding protein 2
ENSCHIG00000018376	K04365	BRAF; B-Raf proto-oncogene serine/threonine-protein kinase [EC:2.7.11.1]
ENSCHIG00000006954	K04366	RAF1; RAF proto-oncogene serine/threonine-protein kinase [EC:2.7.11.1]
ENSCHIG00000021340	K04368	MAP2K1, MEK1; mitogen-activated protein kinase kinase 1 [EC:2.7.12.2]
ENSCHIG00000023887	K04370	LAMTOR3, MP1, MAP2K1IP1; ragulator complex protein LAMTOR3
ENSCHIG00000016099	K04371	ERK, MAPK1_3; mitogen-activated protein kinase 1/3 [EC:2.7.11.24]
ENSCHIG00000025017	K04372	MKNK, MNK; MAP kinase interacting serine/threonine kinase [EC:2.7.11.1]
ENSCHIG00000026760	K04372	MKNK, MNK; MAP kinase interacting serine/threonine kinase [EC:2.7.11.1]
ENSCHIG00000015239	K04373	RPS6KA; ribosomal protein S6 kinase alpha-1/2/3/6 [EC:2.7.11.1]
ENSCHIG00000016479	K04373	RPS6KA; ribosomal protein S6 kinase alpha-1/2/3/6 [EC:2.7.11.1]
ENSCHIG00000014886	K04374	ATF4, CREB2; cyclic AMP-dependent transcription factor ATF-4
ENSCHIG00000025384	K04379	FOS; proto-oncogene protein c-fos
ENSCHIG00000026221	K04380	MAPT, TAU; microtubule-associated protein tau
ENSCHIG00000014257	K04381	STMN1; stathmin
ENSCHIG00000020412	K04381	STMN1; stathmin
ENSCHIG00000023552	K04381	STMN1; stathmin
ENSCHIG00000025919	K04381	STMN1; stathmin
ENSCHIG00000008011	K04382	PPP2C; serine/threonine-protein phosphatase 2A catalytic subunit [EC:3.1.3.16]
ENSCHIG00000012302	K04382	PPP2C; serine/threonine-protein phosphatase 2A catalytic subunit [EC:3.1.3.16]
ENSCHIG00000011256	K04383	IL1A; interleukin 1 alpha
ENSCHIG00000020538	K04385	AXIN2; axin 2
ENSCHIG00000013024	K04386	IL1R1, CD121a; interleukin 1 receptor type I
ENSCHIG00000024086	K04387	IL1R2, CD121b; interleukin 1 receptor type II
ENSCHIG00000011473	K04388	TGFBR2; TGF-beta receptor type-2 [EC:2.7.11.30]
ENSCHIG00000022754	K04389	TNFSF6, FASL, CD178; tumor necrosis factor ligand superfamily member 6
ENSCHIG00000013251	K04390	TNFRSF6, FAS, CD95; tumor necrosis factor receptor superfamily member 6
ENSCHIG00000009017	K04393	CDC42; cell division control protein 42
ENSCHIG00000013977	K04393	CDC42; cell division control protein 42
ENSCHIG00000011955	K04396	CASP6; caspase 6 [EC:3.4.22.59]
ENSCHIG00000011503	K04397	CASP7; caspase 7 [EC:3.4.22.60]
ENSCHIG00000019146	K04398	CASP8; caspase 8 [EC:3.4.22.61]
ENSCHIG00000016621	K04402	GADD45; growth arrest and DNA-damage-inducible protein
ENSCHIG00000025537	K04402	GADD45; growth arrest and DNA-damage-inducible protein
ENSCHIG00000014927	K04403	MAP3K7IP1, TAB1; TAK1-binding protein 1
ENSCHIG00000021035	K04404	MAP3K7IP2, TAB2; TAK1-binding protein 2
ENSCHIG00000021558	K04405	ECSIT; evolutionarily conserved signaling intermediate in Toll pathway
ENSCHIG00000017624	K04407	MAP4K4, HGK; mitogen-activated protein kinase kinase kinase kinase 4 [EC:2.7.11.1]
ENSCHIG00000018604	K04407	MAP4K4, HGK; mitogen-activated protein kinase kinase kinase kinase 4 [EC:2.7.11.1]
ENSCHIG00000012238	K04408	MAP4K1, HPK1; mitogen-activated protein kinase kinase kinase kinase 1 [EC:2.7.11.1]
ENSCHIG00000003071	K04409	PAK1; p21-activated kinase 1 [EC:2.7.11.1]
ENSCHIG00000003232	K04411	STK4, MST1; serine/threonine kinase 4
ENSCHIG00000010771	K04412	STK3, MST2; serine/threonine kinase 3
ENSCHIG00000012066	K04413	MINK; misshapen/NIK-related kinase [EC:2.7.11.1]
ENSCHIG00000017886	K04415	MAP3K8, COT; mitogen-activated protein kinase kinase kinase 8 [EC:2.7.11.25]
ENSCHIG00000026351	K04416	MAP3K1, MEKK1; mitogen-activated protein kinase kinase kinase 1 [EC:2.7.11.25]
ENSCHIG00000016673	K04417	MAP3K9, MLK1; mitogen-activated protein kinase kinase kinase 9 [EC:2.7.11.25]
ENSCHIG00000010206	K04419	MAP3K11, MLK3; mitogen-activated protein kinase kinase kinase 11 [EC:2.7.11.25]
ENSCHIG00000024378	K04420	MAP3K2, MEKK2; mitogen-activated protein kinase kinase kinase 2 [EC:2.7.11.25]
ENSCHIG00000015662	K04422	MAP3K13, LZK; mitogen-activated protein kinase kinase kinase 13 [EC:2.7.11.25]
ENSCHIG00000008756	K04423	MAP3K12, MUK; mitogen-activated protein kinase kinase kinase 12 [EC:2.7.11.25]
ENSCHIG00000015916	K04424	ZAK, MLTK; sterile alpha motif and leucine zipper containing kinase AZK [EC:2.7.11.25]
ENSCHIG00000011803	K04427	MAP3K7, TAK1; mitogen-activated protein kinase kinase kinase 7 [EC:2.7.11.25]
ENSCHIG00000009330	K04428	MAP3K4, MEKK4; mitogen-activated protein kinase kinase kinase 4 [EC:2.7.11.25]
ENSCHIG00000015173	K04429	TAO; thousand and one amino acid protein kinase [EC:2.7.11.1]
ENSCHIG00000017203	K04429	TAO; thousand and one amino acid protein kinase [EC:2.7.11.1]
ENSCHIG00000020285	K04429	TAO; thousand and one amino acid protein kinase [EC:2.7.11.1]
ENSCHIG00000025624	K04430	MAP2K4, MKK4; mitogen-activated protein kinase kinase 4 [EC:2.7.12.2]
ENSCHIG00000014144	K04432	MAP2K3, MKK3; mitogen-activated protein kinase kinase 3 [EC:2.7.12.2]
ENSCHIG00000024404	K04433	MAP2K6, MKK6; mitogen-activated protein kinase kinase 6 [EC:2.7.12.2]
ENSCHIG00000008393	K04435	MAPK8IP2, JIP2; mitogen-activated protein kinase 8 interacting protein 2
ENSCHIG00000020649	K04436	MAPK8IP3, JIP3; mitogen-activated protein kinase 8 interacting protein 3
ENSCHIG00000015995	K04437	FLNA; filamin
ENSCHIG00000021055	K04437	FLNA; filamin
ENSCHIG00000006532	K04438	CRK, CRKII; proto-oncogene C-crk
ENSCHIG00000009252	K04438	CRK, CRKII; proto-oncogene C-crk
ENSCHIG00000013620	K04439	ARRB; beta-arrestin
ENSCHIG00000015924	K04439	ARRB; beta-arrestin
ENSCHIG00000012374	K04440	JNK; mitogen-activated protein kinase 8/9/10 (c-Jun N-terminal kinase) [EC:2.7.11.24]
ENSCHIG00000025521	K04440	JNK; mitogen-activated protein kinase 8/9/10 (c-Jun N-terminal kinase) [EC:2.7.11.24]
ENSCHIG00000018583	K04441	P38; p38 MAP kinase [EC:2.7.11.24]
ENSCHIG00000023563	K04441	P38; p38 MAP kinase [EC:2.7.11.24]
ENSCHIG00000026966	K04443	MAPKAPK2; mitogen-activated protein kinase-activated protein kinase 2 [EC:2.7.11.1]
ENSCHIG00000013944	K04444	MAPKAPK3; mitogen-activated protein kinase-activated protein kinase 3 [EC:2.7.11.1]
ENSCHIG00000020951	K04446	NFATC1, NFAT2, NFATC; nuclear factor of activated T-cells, cytoplasmic 1
ENSCHIG00000003903	K04447	JAK2; Janus kinase 2 [EC:2.7.10.2]
ENSCHIG00000025000	K04451	TP53, P53; tumor protein p53
ENSCHIG00000011897	K04452	DDIT3, GADD153; DNA damage-inducible transcript 3
ENSCHIG00000015975	K04455	HSPB1; heat shock protein beta-1
ENSCHIG00000015049	K04456	AKT; RAC serine/threonine-protein kinase [EC:2.7.11.1]
ENSCHIG00000023255	K04456	AKT; RAC serine/threonine-protein kinase [EC:2.7.11.1]
ENSCHIG00000022625	K04457	PPM1A, PP2CA; protein phosphatase 1A [EC:3.1.3.16]
ENSCHIG00000022880	K04458	PTPRR; receptor-type tyrosine-protein phosphatase R [EC:3.1.3.48]
ENSCHIG00000008697	K04459	DUSP, MKP; dual specificity MAP kinase phosphatase [EC:3.1.3.16 3.1.3.48]
ENSCHIG00000012922	K04459	DUSP, MKP; dual specificity MAP kinase phosphatase [EC:3.1.3.16 3.1.3.48]
ENSCHIG00000020201	K04459	DUSP, MKP; dual specificity MAP kinase phosphatase [EC:3.1.3.16 3.1.3.48]
ENSCHIG00000024557	K04460	PPP5C; serine/threonine-protein phosphatase 5 [EC:3.1.3.16]
ENSCHIG00000022020	K04461	PPM1B, PP2CB; protein phosphatase 1B [EC:3.1.3.16]
ENSCHIG00000015174	K04462	MECOM, EVI1; ecotropic virus integration site 1 protein
ENSCHIG00000022039	K04463	MAP2K5, MEK5; mitogen-activated protein kinase kinase 5 [EC:2.7.12.2]
ENSCHIG00000013929	K04464	MAPK7; mitogen-activated protein kinase 7 [EC:2.7.11.24]
ENSCHIG00000017053	K04467	IKBKA, IKKA, CHUK; inhibitor of nuclear factor kappa-B kinase subunit alpha [EC:2.7.11.10]
ENSCHIG00000026747	K04482	RAD51; DNA repair protein RAD51
ENSCHIG00000017996	K04487	iscS, NFS1; cysteine desulfurase [EC:2.8.1.7]
ENSCHIG00000010768	K04490	TCF7L1; transcription factor 7-like 1
ENSCHIG00000009681	K04491	TCF7L2; transcription factor 7-like 2
ENSCHIG00000024090	K04493	ICAT, CTNNBIP1; beta-catenin-interacting protein 1 (inhibitor of beta-catenin and Tcf-4)
ENSCHIG00000020928	K04495	SOX17; transcription factor SOX17 (SOX group F)
ENSCHIG00000020240	K04496	CTBP; C-terminal binding protein
ENSCHIG00000025244	K04496	CTBP; C-terminal binding protein
ENSCHIG00000012967	K04497	GROUCHO; groucho
ENSCHIG00000018271	K04497	GROUCHO; groucho
ENSCHIG00000018660	K04497	GROUCHO; groucho
ENSCHIG00000019014	K04497	GROUCHO; groucho
ENSCHIG00000019651	K04497	GROUCHO; groucho
ENSCHIG00000026991	K04497	GROUCHO; groucho
ENSCHIG00000017639	K04498	EP300, CREBBP, KAT3; E1A/CREB-binding protein [EC:2.3.1.48]
ENSCHIG00000019299	K04499	RUVBL1, RVB1, INO80H; RuvB-like protein 1 (pontin 52)
ENSCHIG00000019181	K04501	SMAD4; mothers against decapentaplegic homolog 4
ENSCHIG00000022890	K04502	FOSL1; fos-like antigen 1
ENSCHIG00000010534	K04503	CCND1; G1/S-specific cyclin-D1
ENSCHIG00000013898	K04504	NR1C2, PPARD; peroxisome proliferator-activated receptor delta
ENSCHIG00000025284	K04505	PSEN1, PS1; presenilin 1 [EC:3.4.23.-]
ENSCHIG00000017834	K04506	SIAH1; E3 ubiquitin-protein ligase SIAH1 [EC:2.3.2.27]
ENSCHIG00000021556	K04507	CACYBP, SIP; calcyclin binding protein
ENSCHIG00000010626	K04508	TBL1; transducin (beta)-like 1
ENSCHIG00000011522	K04510	VANGL; vang-like
ENSCHIG00000010654	K04511	PRICKLE; prickle
ENSCHIG00000012706	K04511	PRICKLE; prickle
ENSCHIG00000021416	K04511	PRICKLE; prickle
ENSCHIG00000026164	K04511	PRICKLE; prickle
ENSCHIG00000000665	K04512	DAAM; dishevelled associated activator of morphogenesis
ENSCHIG00000013894	K04513	RHOA; Ras homolog gene family, member A
ENSCHIG00000009880	K04515	CAMK2; calcium/calmodulin-dependent protein kinase (CaM kinase) II [EC:2.7.11.17]
ENSCHIG00000010155	K04515	CAMK2; calcium/calmodulin-dependent protein kinase (CaM kinase) II [EC:2.7.11.17]
ENSCHIG00000025051	K04515	CAMK2; calcium/calmodulin-dependent protein kinase (CaM kinase) II [EC:2.7.11.17]
ENSCHIG00000024469	K04519	IL1B; interleukin 1 beta
ENSCHIG00000026432	K04520	APP; amyloid beta A4 protein
ENSCHIG00000018165	K04521	BACE1; beta-site APP-cleaving enzyme 1 (memapsin 2) [EC:3.4.23.46]
ENSCHIG00000025180	K04522	PSEN2, PS2; presenilin 2 [EC:3.4.23.-]
ENSCHIG00000015053	K04523	UBQLN, DSK2; ubiquilin
ENSCHIG00000015156	K04523	UBQLN, DSK2; ubiquilin
ENSCHIG00000019022	K04525	SERPINA; serpin A
ENSCHIG00000024163	K04525	SERPINA; serpin A
ENSCHIG00000014171	K04527	INSR, CD220; insulin receptor [EC:2.7.10.1]
ENSCHIG00000024058	K04530	APBB2, FE65L; amyloid beta A4 precursor protein-binding family B member 2
ENSCHIG00000026634	K04533	HD; huntingtin
ENSCHIG00000017883	K04534	GNAO, G-ALPHA-O; guanine nucleotide-binding protein G(o) subunit alpha
ENSCHIG00000010479	K04536	GNB1; guanine nucleotide-binding protein G(I)/G(S)/G(T) subunit beta-1
ENSCHIG00000002627	K04537	GNB2; guanine nucleotide-binding protein G(I)/G(S)/G(T) subunit beta-2
ENSCHIG00000011036	K04538	GNB4; guanine nucleotide-binding protein subunit beta-4
ENSCHIG00000024417	K04539	GNB5; guanine nucleotide-binding protein subunit beta-5
ENSCHIG00000015824	K04540	GNG3; guanine nucleotide-binding protein G(I)/G(S)/G(O) subunit gamma-3
ENSCHIG00000000426	K04541	GNG4; guanine nucleotide-binding protein G(I)/G(S)/G(O) subunit gamma-4
ENSCHIG00000016183	K04542	GNG5; guanine nucleotide-binding protein G(I)/G(S)/G(O) subunit gamma-5
ENSCHIG00000006556	K04555	UBE2G2, UBC7; ubiquitin-conjugating enzyme E2 G2 [EC:2.3.2.23]
ENSCHIG00000013060	K04558	SNCAIP; synuclein, alpha interacting protein (synphilin)
ENSCHIG00000022292	K04559	HIP1; huntingtin interacting protein 1
ENSCHIG00000009947	K04564	SOD2; superoxide dismutase, Fe-Mn family [EC:1.15.1.1]
ENSCHIG00000014496	K04565	SOD1; superoxide dismutase, Cu-Zn family [EC:1.15.1.1]
ENSCHIG00000014108	K04567	KARS, lysS; lysyl-tRNA synthetase, class II [EC:6.1.1.6]
ENSCHIG00000015765	K04569	CCS; copper chaperone for superoxide dismutase
ENSCHIG00000024173	K04570	BCL2L1, bcl-xL; Bcl-2-like 1 (apoptosis regulator Bcl-X)
ENSCHIG00000019945	K04573	NEF3, NF-M; neurofilament medium polypeptide (neurofilament 3)
ENSCHIG00000016752	K04575	ALS2; amyotrophic lateral sclerosis 2 protein
ENSCHIG00000023750	K04575	ALS2; amyotrophic lateral sclerosis 2 protein
ENSCHIG00000012190	K04577	CALCRL; calcitonin receptor-like
ENSCHIG00000019825	K04578	CRHR1; corticotropin releasing hormone receptor 1
ENSCHIG00000022787	K04581	GLP1R; glucagon-like peptide 1 receptor
ENSCHIG00000026542	K04582	GLP2R; glucagon-like peptide 2 receptor
ENSCHIG00000016817	K04584	GHRHR; growth hormone releasing hormone receptor
ENSCHIG00000023110	K04588	SCTR; secretin receptor
ENSCHIG00000021318	K04589	VIPR1; vasoactive intestinal peptide receptor 1
ENSCHIG00000024861	K04590	VIPR2; vasoactive intestinal peptide receptor 2
ENSCHIG00000025611	K04592	ADGRL1, LPHN1; adhesion G protein-coupled receptor L1
ENSCHIG00000018750	K04593	ADGRL2, LPHN2; adhesion G protein-coupled receptor L2
ENSCHIG00000020032	K04595	ADGRL4, ELTD1; adhesion G protein-coupled receptor L4
ENSCHIG00000024973	K04597	ADGRB2, BAI2; adhesion G protein-coupled receptor B2
ENSCHIG00000014726	K04598	ADGRB3, BAI3; adhesion G protein-coupled receptor B3
ENSCHIG00000018021	K04600	CELSR1; cadherin EGF LAG seven-pass G-type receptor 1
ENSCHIG00000025143	K04601	CELSR2; cadherin EGF LAG seven-pass G-type receptor 2
ENSCHIG00000018245	K04602	CELSR3; cadherin EGF LAG seven-pass G-type receptor 3
ENSCHIG00000013666	K04615	GABBR; gamma-aminobutyric acid type B receptor
ENSCHIG00000024967	K04615	GABBR; gamma-aminobutyric acid type B receptor
ENSCHIG00000017075	K04619	GPRC5B; G protein-coupled receptor family C group 5 member B
ENSCHIG00000019962	K04620	GPRC5C; G protein-coupled receptor family C group 5 member C
ENSCHIG00000017623	K04628	CGT, UGT8; ceramide galactosyltransferase [EC:2.4.1.47]
ENSCHIG00000023476	K04630	GNAI; guanine nucleotide-binding protein G(i) subunit alpha
ENSCHIG00000024481	K04630	GNAI; guanine nucleotide-binding protein G(i) subunit alpha
ENSCHIG00000014165	K04631	GNAT1_2; guanine nucleotide-binding protein G(t) subunit alpha 1/2
ENSCHIG00000025103	K04631	GNAT1_2; guanine nucleotide-binding protein G(t) subunit alpha 1/2
ENSCHIG00000012068	K04634	GNAQ; guanine nucleotide-binding protein G(q) subunit alpha
ENSCHIG00000021016	K04634	GNAQ; guanine nucleotide-binding protein G(q) subunit alpha
ENSCHIG00000006621	K04637	GNA15; guanine nucleotide-binding protein subunit alpha-15
ENSCHIG00000014040	K04639	GNA13; guanine nucleotide-binding protein subunit alpha-13
ENSCHIG00000016030	K04644	CLTA, LCA; clathrin light chain A
ENSCHIG00000018170	K04645	CLTB, LCB; clathrin light chain B
ENSCHIG00000017033	K04649	HIP2, UBC1; ubiquitin-conjugating enzyme (huntingtin interacting protein 2) [EC:2.3.2.23]
ENSCHIG00000009735	K04650	NCOR1, N-CoR; nuclear receptor co-repressor 1
ENSCHIG00000015152	K04659	THBS2S; thrombospondin 2/3/4/5
ENSCHIG00000016627	K04659	THBS2S; thrombospondin 2/3/4/5
ENSCHIG00000024483	K04659	THBS2S; thrombospondin 2/3/4/5
ENSCHIG00000018030	K04660	DCN; decorin
ENSCHIG00000021149	K04662	BMP4; bone morphogenetic protein 4
ENSCHIG00000010429	K04663	BMP5; bone morphogenetic protein 5
ENSCHIG00000025901	K04667	INHBA; inhibin beta A chain
ENSCHIG00000013353	K04670	ACVR2A; activin receptor type-2A [EC:2.7.11.30]
ENSCHIG00000020243	K04671	BMPR2; bone morphogenetic protein receptor type-2 [EC:2.7.11.30]
ENSCHIG00000000448	K04673	BMPR1A, ALK3, CD292; bone morphogenetic protein receptor type-1A [EC:2.7.11.30]
ENSCHIG00000022353	K04674	TGFBR1, ALK5; TGF-beta receptor type-1 [EC:2.7.11.30]
ENSCHIG00000022652	K04675	ACVR1, ALK2; activin receptor type-1 [EC:2.7.11.30]
ENSCHIG00000011281	K04676	SMAD1; mothers against decapentaplegic homolog 1
ENSCHIG00000012651	K04677	SMAD6; mothers against decapentaplegic homolog 6
ENSCHIG00000017881	K04678	SMURF; E3 ubiquitin ligase SMURF1/2 [EC:2.3.2.26]
ENSCHIG00000027010	K04678	SMURF; E3 ubiquitin ligase SMURF1/2 [EC:2.3.2.26]
ENSCHIG00000022133	K04679	MADHIP, SARA; MAD, mothers against decapentaplegic interacting protein
ENSCHIG00000027153	K04679	MADHIP, SARA; MAD, mothers against decapentaplegic interacting protein
ENSCHIG00000012871	K04682	E2F4_5; transcription factor E2F4/5
ENSCHIG00000016663	K04682	E2F4_5; transcription factor E2F4/5
ENSCHIG00000012718	K04684	SP1; transcription factor Sp1
ENSCHIG00000025845	K04685	CDKN2B, P15, INK4B; cyclin-dependent kinase inhibitor 2B
ENSCHIG00000010484	K04686	PITX2; paired-like homeodomain transcription factor 2
ENSCHIG00000016504	K04687	IFNG; interferon gamma
ENSCHIG00000005906	K04688	RPS6KB; ribosomal protein S6 kinase beta [EC:2.7.11.1]
ENSCHIG00000009327	K04688	RPS6KB; ribosomal protein S6 kinase beta [EC:2.7.11.1]
ENSCHIG00000020307	K04692	STAT3; signal transducer and activator of transcription 3
ENSCHIG00000015878	K04693	IRF9, ISGF3G, P48; interferon regulatory factor 9
ENSCHIG00000027066	K04695	SOCS2, CIS2; suppressor of cytokine signaling 2
ENSCHIG00000011290	K04696	SOCS3, CIS3; suppressor of cytokine signaling 3
ENSCHIG00000008618	K04697	SOCS4; suppressor of cytokine signaling 4
ENSCHIG00000012449	K04699	SOCS6_7; suppressor of cytokine signaling 6/7
ENSCHIG00000024754	K04699	SOCS6_7; suppressor of cytokine signaling 6/7
ENSCHIG00000015361	K04701	CISH; cytokine inducible SH2-containing protein
ENSCHIG00000023888	K04702	PIM1; proto-oncogene serine/threonine-protein kinase Pim-1 [EC:2.7.11.1]
ENSCHIG00000011243	K04703	SPRED; sprouty-related, EVH1 domain-containing protein
ENSCHIG00000013086	K04703	SPRED; sprouty-related, EVH1 domain-containing protein
ENSCHIG00000004568	K04705	STAM; signal transducing adaptor molecule
ENSCHIG00000020598	K04705	STAM; signal transducing adaptor molecule
ENSCHIG00000014001	K04706	PIAS1; E3 SUMO-protein ligase PIAS1 [EC:2.3.2.-]
ENSCHIG00000008131	K04707	CBL; E3 ubiquitin-protein ligase CBL [EC:2.3.2.27]
ENSCHIG00000025546	K04710	CERS1_2_3_4, LASS1_2_3_4; ceramide synthetase [EC:2.3.1.24]
ENSCHIG00000012398	K04711	ACER3, YDC1; dihydroceramidase [EC:3.5.1.-]
ENSCHIG00000017842	K04714	SGMS; shingomyelin synthase [EC:2.7.8.27]
ENSCHIG00000020626	K04716	SGPP1; sphingosine-1-phosphate phosphatase 1 [EC:3.1.3.-]
ENSCHIG00000024197	K04718	SPHK; sphingosine kinase [EC:2.7.1.91]
ENSCHIG00000016856	K04721	TNFSF10, TRAIL, CD253; tumor necrosis factor ligand superfamily member 10
ENSCHIG00000021504	K04722	TNFRSF10A_B, TRAILR1_2, DR4_5, CD261_2; tumor necrosis factor receptor superfamily member 10A/B
ENSCHIG00000017471	K04723	IL1RAP; interleukin 1 receptor accessory protein
ENSCHIG00000016459	K04724	CFLAR, FLIP; CASP8 and FADD-like apoptosis regulator
ENSCHIG00000014373	K04726	BID; BH3 interacting domain death agonist
ENSCHIG00000016588	K04728	ATM, TEL1; serine-protein kinase ATM [EC:2.7.11.1]
ENSCHIG00000017653	K04729	MYD88; myeloid differentiation primary response protein MyD88
ENSCHIG00000021382	K04731	IRAK2; interleukin-1 receptor-associated kinase 2 [EC:2.7.11.1]
ENSCHIG00000025230	K04732	IRAK3; interleukin-1 receptor-associated kinase 3 [EC:2.7.11.1]
ENSCHIG00000010157	K04734	NFKBIA; NF-kappa-B inhibitor alpha
ENSCHIG00000015135	K04735	RELA; transcription factor p65
ENSCHIG00000011742	K04738	CSF2RB, IL3RB, CD131; cytokine receptor common subunit beta
ENSCHIG00000011507	K04739	PRKAR; cAMP-dependent protein kinase regulator
ENSCHIG00000025667	K04739	PRKAR; cAMP-dependent protein kinase regulator
ENSCHIG00000026914	K04739	PRKAR; cAMP-dependent protein kinase regulator
ENSCHIG00000005612	K04742	CHST12; chondroitin 4-sulfotransferase 12 [EC:2.8.2.5]
ENSCHIG00000010707	K04745	CHST2; carbohydrate 6-sulfotransferase 2 [EC:2.8.2.-]
ENSCHIG00000007788	K04746	CHST4; carbohydrate 6-sulfotransferase 4 [EC:2.8.2.-]
ENSCHIG00000021078	K04798	pfdB, PFDN6; prefoldin beta subunit
ENSCHIG00000009155	K04799	FEN1, RAD2; flap endonuclease-1 [EC:3.-.-.-]
ENSCHIG00000014447	K04805	CHRNA3; nicotinic acetylcholine receptor alpha-3
ENSCHIG00000017279	K04807	CHRNA5; nicotinic acetylcholine receptor alpha-5
ENSCHIG00000024125	K04808	CHRNA6; nicotinic acetylcholine receptor alpha-6
ENSCHIG00000014506	K04812	CHRNB1; nicotinic acetylcholine receptor beta-1
ENSCHIG00000021805	K04817	CHRNE; nicotinic acetylcholine receptor epsilon
ENSCHIG00000017073	K04819	HTR3; 5-hydroxytryptamine receptor 3
ENSCHIG00000025459	K04819	HTR3; 5-hydroxytryptamine receptor 3
ENSCHIG00000009435	K04824	SCNN1A, ENACA; amiloride-sensitive sodium channel subunit alpha
ENSCHIG00000021500	K04825	SCNN1B, ENACB; amiloride-sensitive sodium channel subunit beta
ENSCHIG00000026032	K04828	ASIC2, ACCN1, BNAC1; acid-sensing ion channel 2
ENSCHIG00000026006	K04829	ASIC1, ACCN2, BNAC2; acid-sensing ion channel 1
ENSCHIG00000016974	K04836	SCN3A, NAV1.3; voltage-gated sodium channel type III alpha
ENSCHIG00000018164	K04839	SCN7A, SCN6A; voltage-gated sodium channel type VII alpha
ENSCHIG00000020127	K04841	SCN9A, NAV1.7; voltage-gated sodium channel type IX alpha
ENSCHIG00000021823	K04843	SCN11A, NAV1.9; voltage-gated sodium channel type XI alpha
ENSCHIG00000005457	K04849	CACNA1B, CAV2.2; voltage-dependent calcium channel N type alpha-1B
ENSCHIG00000021199	K04852	CACNA1E, CAV2.3; voltage-dependent calcium channel R type alpha-1E
ENSCHIG00000008392	K04854	CACNA1G, CAV3.1; voltage-dependent calcium channel T type alpha-1G
ENSCHIG00000023258	K04858	CACNA2D1; voltage-dependent calcium channel alpha-2/delta-1
ENSCHIG00000013964	K04859	CACNA2D2; voltage-dependent calcium channel alpha-2/delta-2
ENSCHIG00000001734	K04863	CACNB2; voltage-dependent calcium channel beta-2
ENSCHIG00000013367	K04865	CACNB4; voltage-dependent calcium channel beta-4
ENSCHIG00000001648	K04877	KCNA4, KV1.4; potassium voltage-gated channel Shaker-related subfamily A member 4
ENSCHIG00000023684	K04882	KCNAB1; potassium voltage-gated channel Shaker-related subfamily A, beta member 1
ENSCHIG00000011995	K04884	KCNAB3; potassium voltage-gated channel Shaker-related subfamily A, beta member 3
ENSCHIG00000022646	K04890	KCNC4, KV3.4; potassium voltage-gated channel Shaw-related subfamily C member 4
ENSCHIG00000019455	K04893	KCND3, KV4.3; potassium voltage-gated channel Shal-related subfamily D member 3
ENSCHIG00000004672	K04897	KCNE3; potassium voltage-gated channel Isk-related subfamily E member 3
ENSCHIG00000012739	K04899	KCNF1, KV5.1; potassium voltage-gated channel subfamily F member 1
ENSCHIG00000023227	K04902	KCNG3, KV6.3; potassium voltage-gated channel subfamily G member 3
ENSCHIG00000014356	K04904	KCNH1, KV10.1; potassium voltage-gated channel Eag-related subfamily H member 1
ENSCHIG00000019111	K04905	KCNH2, KV11.1; potassium voltage-gated channel Eag-related subfamily H member 2
ENSCHIG00000019165	K04909	KCNH6, KV11.2; potassium voltage-gated channel Eag-related subfamily H member 6
ENSCHIG00000026110	K04912	KCNK1, K2P1.1; potassium channel subfamily K member 1
ENSCHIG00000021436	K04913	KCNK2, K2P2.1; potassium channel subfamily K member 2
ENSCHIG00000026730	K04914	KCNK3, K2P3.1; potassium channel subfamily K member 3
ENSCHIG00000022634	K04916	KCNK5, K2P5.1; potassium channel subfamily K member 5
ENSCHIG00000021596	K04917	KCNK6, K2P6.1; potassium channel subfamily K member 6
ENSCHIG00000019755	K04918	KCNK7, K2P7.1; potassium channel subfamily K member 7
ENSCHIG00000022281	K04919	KCNK9, K2P9.1; potassium channel subfamily K member 9
ENSCHIG00000016823	K04920	KCNK10, K2P10.1; potassium channel subfamily K member 10
ENSCHIG00000025707	K04924	KCNK16, K2P16.1; potassium channel subfamily K member 16
ENSCHIG00000026243	K04925	KCNK17, K2P17.1; potassium channel subfamily K member 17
ENSCHIG00000020793	K04926	KCNQ1, KV7.1; potassium voltage-gated channel KQT-like subfamily member 1
ENSCHIG00000018348	K04930	KCNQ5, KV7.5; potassium voltage-gated channel KQT-like subfamily member 5
ENSCHIG00000025127	K04936	KCNMA1, KCA1.1; potassium large conductance calcium-activated channel subfamily M alpha member 1
ENSCHIG00000014377	K04942	KCNN1, KCA2.1; potassium intermediate/small conductance calcium-activated channel subfamily N member 1
ENSCHIG00000018108	K04945	KCNN4, KCA3.1; potassium intermediate/small conductance calcium-activated channel subfamily N member 4
ENSCHIG00000007884	K04946	KCNT1, KNA1.1; potassium channel subfamily T member 1
ENSCHIG00000013825	K04948	CNGA1; cyclic nucleotide gated channel alpha 1
ENSCHIG00000021893	K04955	HCN2; hyperpolarization activated cyclic nucleotide-gated potassium channel 2
ENSCHIG00000018318	K04958	ITPR1; inositol 1,4,5-triphosphate receptor type 1
ENSCHIG00000016600	K04959	ITPR2; inositol 1,4,5-triphosphate receptor type 2
ENSCHIG00000007818	K04960	ITPR3; inositol 1,4,5-triphosphate receptor type 3
ENSCHIG00000020690	K04964	TRPC1; transient receptor potential cation channel subfamily C member 1
ENSCHIG00000025819	K04966	TRPC3; transient receptor potential cation channel subfamily C member 3
ENSCHIG00000006698	K04967	TRPC4; transient receptor potential cation channel subfamily C member 4
ENSCHIG00000020752	K04972	TRPV3; transient receptor potential cation channel subfamily V member 3
ENSCHIG00000013785	K04973	TRPV4; transient receptor potential cation channel subfamily V member 4
ENSCHIG00000017260	K04979	TRPM4; transient receptor potential cation channel subfamily M member 4
ENSCHIG00000002319	K04980	TRPM5; transient receptor potential cation channel subfamily M member 5
ENSCHIG00000019917	K04981	TRPM6, CHAK2; transient receptor potential cation channel subfamily M member 6 [EC:2.7.11.1]
ENSCHIG00000026726	K04983	TRPM8; transient receptor potential cation channel subfamily M member 8
ENSCHIG00000012691	K04984	TRPA1, ANKTM1; transient receptor potential cation channel subfamily A member 1
ENSCHIG00000020340	K04986	PKD2; polycystin 2
ENSCHIG00000004177	K04988	PKD1L2; polycystin 1L2
ENSCHIG00000022103	K04989	PKD1L3; polycystin 1L3
ENSCHIG00000008729	K04993	MCOLN2, TRPML2; mucolipin 2
ENSCHIG00000002047	K04996	KCNJ2, KIR2.1; potassium inwardly-rectifying channel subfamily J member 2
ENSCHIG00000023544	K05001	KCNJ8, KIR6.1; potassium inwardly-rectifying channel subfamily J member 8
ENSCHIG00000009617	K05004	KCNJ11, KIR6.2; potassium inwardly-rectifying channel subfamily J member 11
ENSCHIG00000010300	K05005	KCNJ12, KIR2.2; potassium inwardly-rectifying channel subfamily J member 12
ENSCHIG00000019301	K05012	CLCN3_4_5; chloride channel 3/4/5
ENSCHIG00000015137	K05015	CLCN6; chloride channel 6
ENSCHIG00000016124	K05016	CLCN7; chloride channel 7
ENSCHIG00000000488	K05023	CLIC3; chloride intracellular channel protein 3
ENSCHIG00000011710	K05024	CLIC4; chloride intracellular channel protein 4
ENSCHIG00000014360	K05025	CLIC5; chloride intracellular channel protein 5
ENSCHIG00000011719	K05027	CLCA1; calcium-activated chloride channel regulator 1
ENSCHIG00000027130	K05028	CLCA2; calcium-activated chloride channel regulator 2
ENSCHIG00000007867	K05030	CLCA3_4; calcium-activated chloride channel regulator 3/4
ENSCHIG00000021877	K05030	CLCA3_4; calcium-activated chloride channel regulator 3/4
ENSCHIG00000017768	K05031	CFTR, ABCC7; cystic fibrosis transmembrane conductance regulator [EC:5.6.1.6]
ENSCHIG00000014117	K05032	ABCC8, SUR1; ATP-binding cassette subfamily C (CFTR/MRP) member 8
ENSCHIG00000026713	K05033	ABCC9, SUR2; ATP-binding cassette subfamily C (CFTR/MRP) member 9
ENSCHIG00000021410	K05036	SLC6A3, DAT; solute carrier family 6 (neurotransmitter transporter, dopamine) member 3
ENSCHIG00000003163	K05037	SLC6A4, SERT; solute carrier family 6 (neurotransmitter transporter, serotonin) member 4
ENSCHIG00000026700	K05038	SLC6A5_9, GLYT; solute carrier family 6 (neurotransmitter transporter, glycine) member 5/9
ENSCHIG00000024785	K05039	SLC6A6, TAUT; solute carrier family 6 (neurotransmitter transporter, taurine) member 6
ENSCHIG00000022198	K05040	SLC6A7, PROT; solute carrier family 6 (neurotransmitter transporter, L-proline) member 7
ENSCHIG00000010349	K05048	SLC6A15S; solute carrier family 6 (neurotransmitter transporter, amino acid/orphan) member 15/16/17/18/20
ENSCHIG00000009367	K05057	OSMR; oncostatin M receptor
ENSCHIG00000014349	K05058	LIFR, CD118; leukemia inhibitory factor receptor
ENSCHIG00000010514	K05059	CNTFR; ciliary neurotrophic factor receptor
ENSCHIG00000008069	K05060	IL6ST, GP130, CD130; interleukin 6 signal transducer
ENSCHIG00000023226	K05062	LEPR, CD295; leptin receptor
ENSCHIG00000027177	K05063	IL12RB1, CD212; interleukin 12 receptor beta-1
ENSCHIG00000023744	K05065	IL23R; interleukin 23 receptor
ENSCHIG00000009532	K05068	IL2RA, CD25; interleukin 2 receptor alpha
ENSCHIG00000016735	K05069	IL2RB, CD122; interleukin 2 receptor beta
ENSCHIG00000020331	K05071	IL4R, CD124; interleukin 4 receptor
ENSCHIG00000020828	K05072	IL7R, CD127; interleukin 7 receptor
ENSCHIG00000012562	K05074	IL15RA, CD215; interleukin 15 receptor alpha
ENSCHIG00000008595	K05079	EPOR; erythropoietin receptor
ENSCHIG00000010864	K05081	PRLR; prolactin receptor
ENSCHIG00000025897	K05083	ERBB2, HER2, CD340; receptor tyrosine-protein kinase erbB-2 [EC:2.7.10.1]
ENSCHIG00000013969	K05084	ERBB3, HER3; receptor tyrosine-protein kinase erbB-3 [EC:2.7.10.1]
ENSCHIG00000023990	K05087	IGF1R, CD221; insulin-like growth factor 1 receptor [EC:2.7.10.1]
ENSCHIG00000016323	K05088	ROS1; proto-oncogene tyrosine-protein kinase ROS [EC:2.7.10.1]
ENSCHIG00000024821	K05089	PDGFRB, CD140B; platelet-derived growth factor receptor beta [EC:2.7.10.1]
ENSCHIG00000026731	K05090	CSF1R, FMS, CD115; macrophage colony-stimulating factor 1 receptor [EC:2.7.10.1]
ENSCHIG00000022287	K05091	KIT, SCFR, CD117; proto-oncogene tyrosine-protein kinase Kit [EC:2.7.10.1]
ENSCHIG00000017963	K05093	FGFR2, CD332; fibroblast growth factor receptor 2 [EC:2.7.10.1]
ENSCHIG00000023444	K05095	FGFR4, CD334; fibroblast growth factor receptor 4 [EC:2.7.10.1]
ENSCHIG00000019587	K05096	FLT1, VEGFR1; FMS-like tyrosine kinase 1 [EC:2.7.10.1]
ENSCHIG00000006477	K05098	KDR, VEGFR2, CD309; kinase insert domain protein receptor [EC:2.7.10.1]
ENSCHIG00000025688	K05100	MST1R, RON, CD136; macrophage-stimulating 1 receptor [EC:2.7.10.1]
ENSCHIG00000010670	K05101	NTRK3, TRKC; neurotrophic tyrosine kinase, receptor type 3 [EC:2.7.10.1]
ENSCHIG00000021379	K05102	EPHA1, EPH; Eph receptor A1 [EC:2.7.10.1]
ENSCHIG00000015531	K05103	EPHA2, ECK; Eph receptor A2 [EC:2.7.10.1]
ENSCHIG00000015544	K05104	EPHA3, HEK, TYRO4; Eph receptor A3 [EC:2.7.10.1]
ENSCHIG00000025019	K05105	EPHA4, SEK, TYRO1; Eph receptor A4 [EC:2.7.10.1]
ENSCHIG00000022795	K05111	EPHB2, ERK, DRT; Eph receptor B2 [EC:2.7.10.1]
ENSCHIG00000005276	K05112	EPHB3, HEK2, ETK2; Eph receptor B3 [EC:2.7.10.1]
ENSCHIG00000015303	K05114	EPHB6; Eph receptor B6 [EC:2.7.10.1]
ENSCHIG00000020380	K05115	AXL, UFO; AXL receptor tyrosine kinase [EC:2.7.10.1]
ENSCHIG00000014303	K05116	TYRO3, RSE; TYRO3 protein tyrosine kinase 3 [EC:2.7.10.1]
ENSCHIG00000013962	K05121	TEK, TIE2, CD202; endothelial-specific receptor tyrosine kinase [EC:2.7.10.1]
ENSCHIG00000027140	K05122	ROR1, NTRKR1; receptor tyrosine kinase-like orphan receptor 1 [EC:2.7.10.1]
ENSCHIG00000025554	K05123	ROR2, NTRKR2; receptor tyrosine kinase-like orphan receptor 2 [EC:2.7.10.1]
ENSCHIG00000021657	K05124	DDR1, NEP, CD167a; discoidin domain receptor family member 1 [EC:2.7.10.1]
ENSCHIG00000022077	K05125	DDR2, TKT, CD167b; discoidin domain receptor family member 2 [EC:2.7.10.1]
ENSCHIG00000021480	K05126	RET; proto-oncogene tyrosine-protein kinase Ret [EC:2.7.10.1]
ENSCHIG00000019771	K05127	PTK7, CCK4; PTK7 protein tyrosine kinase 7 [EC:2.7.10.1]
ENSCHIG00000023154	K05128	RYK; RYK receptor-like tyrosine kinase [EC:2.7.10.1]
ENSCHIG00000021059	K05129	MUSK; muscle, skeletal, receptor tyrosine kinase [EC:2.7.10.1]
ENSCHIG00000018032	K05130	IFNAR1; interferon receptor 1
ENSCHIG00000019897	K05131	IFNAR2; interferon receptor 2
ENSCHIG00000017662	K05133	IFNGR2; interferon gamma receptor 2
ENSCHIG00000019891	K05135	IL10RB, CD210B; interleukin 10 receptor beta
ENSCHIG00000016224	K05136	IL20RA; interleukin 20 receptor alpha
ENSCHIG00000018646	K05137	IL20RB; interleukin 20 receptor beta
ENSCHIG00000026489	K05139	IL22RA2; interleukin 22 receptor alpha 2
ENSCHIG00000023981	K05140	IFNLR1, IL28RA; interferon lambda receptor 1
ENSCHIG00000023828	K05143	TNFRSF6B, DCR3; tumor necrosis factor receptor superfamily member 6B
ENSCHIG00000021715	K05144	TNFRSF7, CD27; tumor necrosis factor receptor superfamily member 7
ENSCHIG00000025614	K05147	TNFRSF11A, RANK, CD265; tumor necrosis factor receptor superfamily member 11A
ENSCHIG00000024689	K05148	TNFRSF11B, OPG; tumor necrosis factor receptor superfamily member 11B
ENSCHIG00000018287	K05149	TNFRSF12A, FN14, TWEAKR, CD266; tumor necrosis factor receptor superfamily member 12A
ENSCHIG00000014875	K05153	TNFRSF17, BCMA, CD269; tumor necrosis factor receptor superfamily member 17
ENSCHIG00000002653	K05154	TNFRSF18, GITR, CD357; tumor necrosis factor receptor superfamily member 18
ENSCHIG00000021901	K05155	TNFRSF19, TROY; tumor necrosis factor receptor superfamily member 19
ENSCHIG00000026271	K05157	TNFRSF21, DR6, CD358; tumor necrosis factor receptor superfamily member 21
ENSCHIG00000010592	K05160	TNFRSF25; tumor necrosis factor receptor superfamily member 25
ENSCHIG00000024441	K05162	EDAR; tumor necrosis factor receptor superfamily member EDAR
ENSCHIG00000024237	K05165	IL17RB, IL17RH1; interleukin 17 receptor B
ENSCHIG00000008351	K05166	IL17RC, IL17RL; interleukin 17 receptor C
ENSCHIG00000026102	K05167	IL17RD, SEF; interleukin 17 receptor D
ENSCHIG00000006313	K05168	IL17RE; interleukin 17 receptor E
ENSCHIG00000022519	K05169	SIGIRR; single Ig IL-1R-related molecule
ENSCHIG00000017390	K05171	IL1RL1, ST2; interleukin 1 receptor-like 1
ENSCHIG00000025961	K05172	IL1RL2, IL1RRP2; interleukin 1 receptor-like 2
ENSCHIG00000009915	K05173	IL18R1, IL1RRP, CD218a; interleukin 18 receptor 1
ENSCHIG00000023746	K05175	GABRA; gamma-aminobutyric acid receptor subunit alpha
ENSCHIG00000017957	K05186	GABRG; gamma-aminobutyric acid receptor subunit gamma
ENSCHIG00000013352	K05190	GABRR; gamma-aminobutyric acid receptor subunit rho
ENSCHIG00000021980	K05202	GRIK2; glutamate receptor, ionotropic kainate 2
ENSCHIG00000008888	K05204	GRIK4; glutamate receptor, ionotropic kainate 4
ENSCHIG00000016229	K05208	GRIN1; glutamate receptor ionotropic, NMDA 1
ENSCHIG00000022718	K05211	GRIN2C; glutamate receptor ionotropic, NMDA 2C
ENSCHIG00000026891	K05214	GRIN3B; glutamate receptor ionotropic, NMDA 3B
ENSCHIG00000023610	K05215	P2RX1; P2X purinoceptor 1
ENSCHIG00000022770	K05216	P2RX2; P2X purinoceptor 2
ENSCHIG00000022913	K05218	P2RX4; P2X purinoceptor 4
ENSCHIG00000022451	K05220	P2RX7; P2X purinoceptor 7
ENSCHIG00000017167	K05227	EDN3; endothelin-3
ENSCHIG00000024414	K05228	POMC; proopiomelanocortin
ENSCHIG00000015954	K05229	PMCH; pro-melanin-concentrating hormone
ENSCHIG00000025308	K05233	PYY; peptide YY
ENSCHIG00000015090	K05236	COPA, RET1; coatomer subunit alpha
ENSCHIG00000006692	K05237	SST; somatostatin
ENSCHIG00000022845	K05239	TAC1; tachykinin 1
ENSCHIG00000013763	K05241	TAC4; tachykinin 4
ENSCHIG00000024788	K05244	GAL; galanin
ENSCHIG00000021277	K05259	GCG; glucagon
ENSCHIG00000015334	K05264	VIP; vasoactive intestinal peptide
ENSCHIG00000023320	K05285	PIGN; GPI ethanolamine phosphate transferase 1 [EC:2.7.-.-]
ENSCHIG00000013960	K05288	PIGO; GPI ethanolamine phosphate transferase 3 subunit O [EC:2.7.-.-]
ENSCHIG00000015619	K05289	GAA1; GPI-anchor transamidase subunit GAA1
ENSCHIG00000002739	K05290	PIGK; GPI-anchor transamidase subunit K
ENSCHIG00000017663	K05291	PIGS; GPI-anchor transamidase subunit S
ENSCHIG00000021336	K05292	PIGT; GPI-anchor transamidase subunit T
ENSCHIG00000018177	K05294	PGAP1; GPI inositol-deacylase [EC:3.-.-.-]
ENSCHIG00000008456	K05302	SETD6; N-lysine methyltransferase SETD6 [EC:2.1.1.-]
ENSCHIG00000003087	K05304	NANS, SAS; sialic acid synthase [EC:2.5.1.56 2.5.1.57 2.5.1.132]
ENSCHIG00000011265	K05305	FUK; fucokinase [EC:2.7.1.52]
ENSCHIG00000026833	K05309	PTGES2; microsomal prostaglandin-E synthase 2 [EC:5.3.99.3]
ENSCHIG00000014195	K05357	VKORC1; vitamin-K-epoxide reductase (warfarin-sensitive) [EC:1.17.4.4]
ENSCHIG00000021386	K05360	TXNDC12; protein-disulfide reductase (glutathione) [EC:1.8.4.2]
ENSCHIG00000016187	K05399	LBP; lipopolysaccharide-binding protein
ENSCHIG00000019736	K05399	LBP; lipopolysaccharide-binding protein
ENSCHIG00000012530	K05400	LY96, MD-2; lymphocyte antigen 96
ENSCHIG00000015873	K05401	TLR3, CD283; toll-like receptor 3
ENSCHIG00000012594	K05402	TOLLIP; toll-interacting protein
ENSCHIG00000015087	K05407	PF4, CXCL4; platelet factor 4
ENSCHIG00000017081	K05408	CCL3; C-C motif chemokine 3
ENSCHIG00000011434	K05409	TIRP, TRAM; TRIF-related adaptor molecule
ENSCHIG00000022746	K05410	TBK1; TANK-binding kinase 1 [EC:2.7.11.10]
ENSCHIG00000017942	K05411	IRF3; interferon regulatory factor 3
ENSCHIG00000017180	K05417	IL11; interleukin 11
ENSCHIG00000014176	K05419	LIF; leukemia inhibitory factor
ENSCHIG00000017208	K05421	BSF3, CLC; B-cell stimulating factor 3
ENSCHIG00000014841	K05422	CTF1, CT1; cardiotrophin 1
ENSCHIG00000013214	K05431	IL7; interleukin 7
ENSCHIG00000024482	K05433	IL15; interleukin 15
ENSCHIG00000018211	K05445	IL22, IL-TIF; interleukin 22
ENSCHIG00000026331	K05446	IL26; interleukin 26
ENSCHIG00000009242	K05448	VEGFA; vascular endothelial growth factor A
ENSCHIG00000015981	K05450	PDGFC_D; platelet derived growth factor C/D
ENSCHIG00000023187	K05452	GDNF; glial cell derived neurotrophic factor
ENSCHIG00000027124	K05453	CSF1, MCSF; macrophage colony-stimulating factor 1
ENSCHIG00000013222	K05454	FLT3LG; fms-related tyrosine kinase 3 ligand
ENSCHIG00000002290	K05455	NRG1; neuregulin 1
ENSCHIG00000011115	K05456	NRG2; neuregulin 2
ENSCHIG00000017944	K05458	NRG4; neuregulin 4
ENSCHIG00000018863	K05459	IGF1; insulin-like growth factor 1
ENSCHIG00000009322	K05460	HGF; hepatocyte growth factor
ENSCHIG00000025211	K05461	KITLG; KIT ligand
ENSCHIG00000005202	K05462	EFNA; ephrin-A
ENSCHIG00000008609	K05462	EFNA; ephrin-A
ENSCHIG00000023314	K05462	EFNA; ephrin-A
ENSCHIG00000020325	K05463	EFNB; ephrin-B
ENSCHIG00000019161	K05466	ANGPT2; angiopoietin 2
ENSCHIG00000019785	K05469	TNFSF4, OX40L, CD252; tumor necrosis factor ligand superfamily member 4
ENSCHIG00000020113	K05471	TNFSF8, CD153; tumor necrosis factor ligand superfamily member 8
ENSCHIG00000004302	K05472	TNFSF9, CD137L; tumor necrosis factor ligand superfamily member 9
ENSCHIG00000000561	K05474	TNFSF12, TWEAK; tumor necrosis factor ligand superfamily member 12
ENSCHIG00000019003	K05475	TNFSF13, APRIL, CD256; tumor necrosis factor ligand superfamily member 13
ENSCHIG00000004013	K05476	TNFSF13B, TNFSF20, CD257; tumor necrosis factor ligand superfamily member 13B
ENSCHIG00000009696	K05481	IL1RN, IL1F3; interleukin 1 receptor antagonist
ENSCHIG00000021710	K05483	IL36RN, IL1F5; interleukin 36 receptor antagonist protein
ENSCHIG00000020898	K05484	IL36A, IL1F6; interleukin 36 alpha
ENSCHIG00000010918	K05486	IL36B, IL1F8; interleukin 36 beta
ENSCHIG00000024406	K05487	IL36G, IL1F9; interleukin 36 gamma
ENSCHIG00000022239	K05489	IL17A, CTLA8; interleukin 17A
ENSCHIG00000023815	K05491	IL17C, CX2; interleukin 17C
ENSCHIG00000008358	K05494	IL17F, ML1; interleukin 17F
ENSCHIG00000026655	K05495	GDF1; growth differentiation factor 1
ENSCHIG00000024999	K05496	BMP3; bone morphogenetic protein 3
ENSCHIG00000023198	K05502	BMP1, TLD; bone morphogenetic protein 1 [EC:3.4.24.19]
ENSCHIG00000027142	K05504	GDF15; growth differentiation factor 15
ENSCHIG00000014217	K05505	CXCL1_2_3, GRO; C-X-C motif chemokine 1/2/3
ENSCHIG00000024071	K05505	CXCL1_2_3, GRO; C-X-C motif chemokine 1/2/3
ENSCHIG00000017060	K05507	XCL1, SCM1; C motif chemokine 1
ENSCHIG00000018403	K05512	CCL19, ELC; C-C motif chemokine 19
ENSCHIG00000023088	K05543	DUS2; tRNA-dihydrouridine synthase 2 [EC:1.3.1.91]
ENSCHIG00000021327	K05544	DUS3; tRNA-dihydrouridine synthase 3 [EC:1.3.1.89]
ENSCHIG00000010888	K05545	DUS4; tRNA-dihydrouridine synthase 4 [EC:1.3.1.90]
ENSCHIG00000022447	K05546	GANAB; mannosyl-oligosaccharide alpha-1,3-glucosidase [EC:3.2.1.207]
ENSCHIG00000023512	K05605	HIBCH; 3-hydroxyisobutyryl-CoA hydrolase [EC:3.1.2.4]
ENSCHIG00000020324	K05606	MCEE, epi; methylmalonyl-CoA/ethylmalonyl-CoA epimerase [EC:5.1.99.1]
ENSCHIG00000024240	K05607	AUH; methylglutaconyl-CoA hydratase [EC:4.2.1.18]
ENSCHIG00000018162	K05609	UCHL3, YUH1; ubiquitin carboxyl-terminal hydrolase L3 [EC:3.4.19.12]
ENSCHIG00000003742	K05610	UCHL5, UCH37; ubiquitin carboxyl-terminal hydrolase L5 [EC:3.4.19.12]
ENSCHIG00000019061	K05611	UCHL1; ubiquitin carboxyl-terminal hydrolase L1 [EC:3.4.19.12]
ENSCHIG00000017045	K05614	SLC1A3, EAAT1; solute carrier family 1 (glial high affinity glutamate transporter), member 3
ENSCHIG00000025336	K05615	SLC1A4, SATT; solute carrier family 1 (neutral amino acid transporter), member 4
ENSCHIG00000020955	K05616	SLC1A5; solute carrier family 1 (neutral amino acid transporter), member 5
ENSCHIG00000020679	K05619	TGM1; transglutaminase 1 [EC:2.3.2.13]
ENSCHIG00000027237	K05620	TGM3; transglutaminase 3 [EC:2.3.2.13]
ENSCHIG00000015160	K05622	TGM5; transglutaminase 5 [EC:2.3.2.13]
ENSCHIG00000017258	K05627	BAIAP2, IRSP53; BAI1-associated protein 2
ENSCHIG00000025014	K05628	RERE; arginine-glutamic acid dipeptide repeats protein
ENSCHIG00000013191	K05632	ITCH, AIP4; E3 ubiquitin-protein ligase Itchy [EC:2.3.2.26]
ENSCHIG00000014184	K05634	PRNP, PrP, CD230; prion protein
ENSCHIG00000014471	K05635	LAMC1; laminin, gamma 1
ENSCHIG00000011086	K05637	LAMA1_2; laminin, alpha 1/2
ENSCHIG00000026055	K05638	NFE2L2, NRF2; nuclear factor erythroid 2-related factor 2
ENSCHIG00000026458	K05639	APLP1; amyloid-like protein 1
ENSCHIG00000024104	K05641	ABCA1; ATP-binding cassette, subfamily A (ABC1), member 1
ENSCHIG00000024025	K05642	ABCA2; ATP-binding cassette, subfamily A (ABC1), member 2
ENSCHIG00000020427	K05643	ABCA3; ATP-binding cassette, subfamily A (ABC1), member 3
ENSCHIG00000021104	K05644	ABCA4; ATP-binding cassette, subfamily A (ABC1), member 4
ENSCHIG00000019371	K05646	ABCA12; ATP-binding cassette, subfamily A (ABC1), member 12
ENSCHIG00000020280	K05648	ABCA5; ATP-binding cassette, subfamily A (ABC1), member 5
ENSCHIG00000021983	K05653	ABCB2, TAP1; ATP-binding cassette, subfamily B (MDR/TAP), member 2
ENSCHIG00000017732	K05654	ABCB3, TAP2; ATP-binding cassette, subfamily B (MDR/TAP), member 3
ENSCHIG00000014567	K05656	ABCB9, TAPL; ATP-binding cassette, subfamily B (MDR/TAP), member 9
ENSCHIG00000024145	K05657	ABCB10; ATP-binding cassette, subfamily B (MDR/TAP), member 10
ENSCHIG00000001102	K05658	ABCB1, CD243; ATP-binding cassette, subfamily B (MDR/TAP), member 1 [EC:7.6.2.2]
ENSCHIG00000019932	K05658	ABCB1, CD243; ATP-binding cassette, subfamily B (MDR/TAP), member 1 [EC:7.6.2.2]
ENSCHIG00000011447	K05659	ABCB4; ATP-binding cassette, subfamily B (MDR/TAP), member 4 [EC:7.6.2.2]
ENSCHIG00000015177	K05661	ABCB6; ATP-binding cassette, subfamily B (MDR/TAP), member 6
ENSCHIG00000010716	K05665	ABCC1; ATP-binding cassette, subfamily C (CFTR/MRP), member 1 [EC:7.6.2.3]
ENSCHIG00000023862	K05665	ABCC1; ATP-binding cassette, subfamily C (CFTR/MRP), member 1 [EC:7.6.2.3]
ENSCHIG00000014984	K05667	ABCC3; ATP-binding cassette, subfamily C (CFTR/MRP), member 3
ENSCHIG00000024341	K05668	ABCC5; ATP-binding cassette, subfamily C (CFTR/MRP), member 5
ENSCHIG00000022604	K05669	ABCC6; ATP-binding cassette, subfamily C (CFTR/MRP), member 6
ENSCHIG00000005530	K05673	ABCC4; ATP-binding cassette, subfamily C (CFTR/MRP), member 4
ENSCHIG00000008083	K05673	ABCC4; ATP-binding cassette, subfamily C (CFTR/MRP), member 4
ENSCHIG00000009607	K05673	ABCC4; ATP-binding cassette, subfamily C (CFTR/MRP), member 4
ENSCHIG00000013314	K05673	ABCC4; ATP-binding cassette, subfamily C (CFTR/MRP), member 4
ENSCHIG00000016126	K05673	ABCC4; ATP-binding cassette, subfamily C (CFTR/MRP), member 4
ENSCHIG00000016664	K05673	ABCC4; ATP-binding cassette, subfamily C (CFTR/MRP), member 4
ENSCHIG00000016690	K05673	ABCC4; ATP-binding cassette, subfamily C (CFTR/MRP), member 4
ENSCHIG00000016995	K05674	ABCC10; ATP-binding cassette, subfamily C (CFTR/MRP), member 10
ENSCHIG00000023422	K05677	ABCD3, PMP70; ATP-binding cassette, subfamily D (ALD), member 3
ENSCHIG00000017269	K05678	ABCD4, PXMP1L; ATP-binding cassette, subfamily D (ALD), member 4
ENSCHIG00000007254	K05679	ABCG1; ATP-binding cassette, subfamily G (WHITE), member 1
ENSCHIG00000021072	K05680	ABCG4; ATP-binding cassette, subfamily G (WHITE), member 4
ENSCHIG00000022088	K05687	PARK7; protein DJ-1 [EC:3.5.1.124]
ENSCHIG00000024436	K05690	CTNND1; catenin (cadherin-associated protein), delta 1
ENSCHIG00000005836	K05691	CTNNA; catenin alpha
ENSCHIG00000011937	K05691	CTNNA; catenin alpha
ENSCHIG00000003341	K05692	ACTB_G1; actin beta/gamma 1
ENSCHIG00000013316	K05692	ACTB_G1; actin beta/gamma 1
ENSCHIG00000017779	K05692	ACTB_G1; actin beta/gamma 1
ENSCHIG00000026676	K05692	ACTB_G1; actin beta/gamma 1
ENSCHIG00000015240	K05693	PTPRM; receptor-type tyrosine-protein phosphatase mu [EC:3.1.3.48]
ENSCHIG00000018145	K05694	PTPRB, PTPB; receptor-type tyrosine-protein phosphatase beta [EC:3.1.3.48]
ENSCHIG00000018438	K05696	PTPN1, PTP1B; tyrosine-protein phosphatase non-receptor type 1 [EC:3.1.3.48]
ENSCHIG00000019949	K05697	PTPN6, SHP-1; tyrosine-protein phosphatase non-receptor type 6 [EC:3.1.3.48]
ENSCHIG00000010789	K05698	PTPRJ, DEP1, CD148; receptor-type tyrosine-protein phosphatase eta [EC:3.1.3.48]
ENSCHIG00000011102	K05699	ACTN1_4; actinin alpha 1/4
ENSCHIG00000015756	K05699	ACTN1_4; actinin alpha 1/4
ENSCHIG00000017162	K05701	TJP1, ZO1; tight junction protein 1
ENSCHIG00000022083	K05702	AF6, MLLT4; afadin
ENSCHIG00000009044	K05703	FYN; tyrosine-protein kinase Fyn [EC:2.7.10.2]
ENSCHIG00000005804	K05704	SRC; tyrosine-protein kinase Src [EC:2.7.10.2]
ENSCHIG00000000143	K05705	YES1; tyrosine-protein kinase Yes [EC:2.7.10.2]
ENSCHIG00000024410	K05706	SNAI2, SLUG; snail 2
ENSCHIG00000014308	K05707	SNAI1; snail 1
ENSCHIG00000021438	K05717	FN1; fibronectin 1
ENSCHIG00000010934	K05719	ITGB1, CD29; integrin beta 1
ENSCHIG00000009338	K05722	FGD3; FYVE, RhoGEF and PH domain containing 3
ENSCHIG00000020399	K05724	FGD5_6; FYVE, RhoGEF and PH domain containing 5/6
ENSCHIG00000023792	K05724	FGD5_6; FYVE, RhoGEF and PH domain containing 5/6
ENSCHIG00000013943	K05725	PTK2, FAK; focal adhesion kinase 1 [EC:2.7.10.2]
ENSCHIG00000026368	K05726	BCAR1, CAS; breast cancer anti-estrogen resistance 1
ENSCHIG00000023471	K05727	DOCK3; dedicator of cytokinesis protein 3
ENSCHIG00000022920	K05728	CSK; c-src tyrosine kinase [EC:2.7.10.2]
ENSCHIG00000011155	K05730	VAV; guanine nucleotide exchange factor VAV
ENSCHIG00000016068	K05730	VAV; guanine nucleotide exchange factor VAV
ENSCHIG00000017920	K05731	TIAM1; T-lymphoma invasion and metastasis-inducing protein 1
ENSCHIG00000023615	K05735	PAK6; p21-activated kinase 6 [EC:2.7.11.1]
ENSCHIG00000021865	K05737	GIT1; G protein-coupled receptor kinase interactor 1
ENSCHIG00000025262	K05740	DIAPH1; diaphanous 1
ENSCHIG00000023737	K05742	SLC9A1, NHE1; solute carrier family 9 (sodium/hydrogen exchanger), member 1
ENSCHIG00000027103	K05743	LIMK1; LIM domain kinase 1 [EC:2.7.11.1]
ENSCHIG00000018019	K05744	LIMK2; LIM domain kinase 2 [EC:2.7.11.1]
ENSCHIG00000020803	K05745	DIAPH3, DRF3; diaphanous 3
ENSCHIG00000022407	K05746	ENAH, MENA; enabled
ENSCHIG00000017200	K05749	CYFIP; cytoplasmic FMR1 interacting protein
ENSCHIG00000002652	K05751	ABI2; abl interactor 2
ENSCHIG00000015054	K05754	ARPC5; actin related protein 2/3 complex, subunit 5
ENSCHIG00000017166	K05754	ARPC5; actin related protein 2/3 complex, subunit 5
ENSCHIG00000021068	K05757	ARPC1A_B; actin related protein 2/3 complex, subunit 1A/1B
ENSCHIG00000007721	K05758	ARPC2; actin related protein 2/3 complex, subunit 2
ENSCHIG00000022037	K05759	PFN; profilin
ENSCHIG00000025972	K05759	PFN; profilin
ENSCHIG00000010749	K05760	PXN; paxillin
ENSCHIG00000016310	K05761	VIL1; villin 1
ENSCHIG00000019539	K05763	MSN; moesin
ENSCHIG00000012574	K05764	TMSB4; thymosin, beta 4
ENSCHIG00000015758	K05765	CFL; cofilin
ENSCHIG00000024457	K05765	CFL; cofilin
ENSCHIG00000016610	K05766	SSH; protein phosphatase slingshot [EC:3.1.3.16 3.1.3.48]
ENSCHIG00000020854	K05767	IQGAP2_3; Ras GTPase-activating-like protein IQGAP2/3
ENSCHIG00000026372	K05767	IQGAP2_3; Ras GTPase-activating-like protein IQGAP2/3
ENSCHIG00000014472	K05768	GSN; gelsolin
ENSCHIG00000021305	K05768	GSN; gelsolin
ENSCHIG00000018690	K05769	ARHGEF4_29, ASEF1_2; Rho guanine nucleotide exchange factor 4/29
ENSCHIG00000023348	K05769	ARHGEF4_29, ASEF1_2; Rho guanine nucleotide exchange factor 4/29
ENSCHIG00000016782	K05771	NR3C1, GR; glucocorticoid receptor
ENSCHIG00000023585	K05810	yfiH; polyphenol oxidase [EC:1.10.3.-]
ENSCHIG00000021314	K05842	TRIF; toll-like receptor adapter molecule 1
ENSCHIG00000021774	K05850	ATP2B; P-type Ca2+ transporter type 2B [EC:7.2.2.10]
ENSCHIG00000018453	K05853	ATP2A; P-type Ca2+ transporter type 2A [EC:7.2.2.10]
ENSCHIG00000025115	K05853	ATP2A; P-type Ca2+ transporter type 2A [EC:7.2.2.10]
ENSCHIG00000022450	K05854	LYN; tyrosine-protein kinase Lyn [EC:2.7.10.2]
ENSCHIG00000013860	K05856	LCK; lymphocyte cell-specific protein tyrosine kinase [EC:2.7.10.2]
ENSCHIG00000012504	K05857	PLCD; phosphatidylinositol phospholipase C, delta [EC:3.1.4.11]
ENSCHIG00000025100	K05857	PLCD; phosphatidylinositol phospholipase C, delta [EC:3.1.4.11]
ENSCHIG00000019547	K05858	PLCB; phosphatidylinositol phospholipase C, beta [EC:3.1.4.11]
ENSCHIG00000023493	K05858	PLCB; phosphatidylinositol phospholipase C, beta [EC:3.1.4.11]
ENSCHIG00000017356	K05859	PLCG2; phosphatidylinositol phospholipase C, gamma-2 [EC:3.1.4.11]
ENSCHIG00000020993	K05860	PLCE; phosphatidylinositol phospholipase C, epsilon [EC:3.1.4.11]
ENSCHIG00000024204	K05862	VDAC1; voltage-dependent anion channel protein 1
ENSCHIG00000010878	K05864	PPID, CYPD; peptidyl-prolyl isomerase D [EC:5.2.1.8]
ENSCHIG00000010268	K05867	CDC25C; M-phase inducer phosphatase 3 [EC:3.1.3.48]
ENSCHIG00000011930	K05869	CAMK4; calcium/calmodulin-dependent protein kinase IV [EC:2.7.11.17]
ENSCHIG00000026234	K05871	PTK2B, FAK2; focal adhesion kinase 2 [EC:2.7.10.2]
ENSCHIG00000021831	K05901	BLVRB; biliverdin reductase / flavin reductase [EC:1.3.1.24 1.5.1.30]
ENSCHIG00000018864	K05906	PCYOX1, FCLY; prenylcysteine oxidase / farnesylcysteine lyase [EC:1.8.3.5 1.8.3.6]
ENSCHIG00000022991	K05906	PCYOX1, FCLY; prenylcysteine oxidase / farnesylcysteine lyase [EC:1.8.3.5 1.8.3.6]
ENSCHIG00000009890	K05917	CYP51; sterol 14alpha-demethylase [EC:1.14.14.154 1.14.15.36]
ENSCHIG00000016723	K05925	METTL3; mRNA m6A methyltransferase catalytic subunit [EC:2.1.1.348]
ENSCHIG00000024680	K05925	METTL3; mRNA m6A methyltransferase catalytic subunit [EC:2.1.1.348]
ENSCHIG00000008507	K05931	CARM1, PRMT4; type I protein arginine methyltransferase [EC:2.1.1.319]
ENSCHIG00000017535	K05940	CROT; carnitine O-octanoyltransferase [EC:2.3.1.137]
ENSCHIG00000023115	K05948	FNG; fringe [EC:2.4.1.222]
ENSCHIG00000011734	K05955	FNTA; protein farnesyltransferase/geranylgeranyltransferase type-1 subunit alpha [EC:2.5.1.58 2.5.1.59]
ENSCHIG00000013246	K05956	RABGGTB; geranylgeranyl transferase type-2 subunit beta [EC:2.5.1.60]
ENSCHIG00000026954	K05970	SIAE; sialate O-acetylesterase [EC:3.1.1.53]
ENSCHIG00000014367	K06013	STE24; STE24 endopeptidase [EC:3.4.24.84]
ENSCHIG00000012970	K06027	NSF, SEC18; vesicle-fusing ATPase [EC:3.6.4.6]
ENSCHIG00000020314	K06037	THNSL2; O-phospho-L-threonine phospho-lyase [EC:4.2.3.-]
ENSCHIG00000011356	K06047	TTL; tubulin---tyrosine ligase [EC:6.3.2.25]
ENSCHIG00000020787	K06051	DLL; delta
ENSCHIG00000020996	K06052	JAG1, CD339; jagged-1
ENSCHIG00000022041	K06053	RBPSUH, RBPJK; recombining binding protein suppressor of hairless
ENSCHIG00000017929	K06054	HES1; hairy and enhancer of split 1
ENSCHIG00000013883	K06058	DTX; deltex [EC:2.3.2.27]
ENSCHIG00000017813	K06058	DTX; deltex [EC:2.3.2.27]
ENSCHIG00000021904	K06058	DTX; deltex [EC:2.3.2.27]
ENSCHIG00000023709	K06058	DTX; deltex [EC:2.3.2.27]
ENSCHIG00000013595	K06059	ADAM17, TACE, CD156b; disintegrin and metalloproteinase domain-containing protein 17 [EC:3.4.24.86]
ENSCHIG00000024765	K06061	MAML; mastermind
ENSCHIG00000021124	K06062	PCAF, KAT2, GCN5; histone acetyltransferase [EC:2.3.1.48]
ENSCHIG00000009383	K06065	NCOR2, SMRT; nuclear receptor co-repressor 2
ENSCHIG00000023936	K06066	CIR; CBF1 interacting corepressor
ENSCHIG00000020549	K06067	HDAC1_2; histone deacetylase 1/2 [EC:3.5.1.98]
ENSCHIG00000015193	K06068	PRKCD; novel protein kinase C delta type [EC:2.7.11.13]
ENSCHIG00000026557	K06069	PRKCI; atypical protein kinase C iota type [EC:2.7.11.13]
ENSCHIG00000017644	K06070	PKD; protein kinase D [EC:2.7.11.13]
ENSCHIG00000009176	K06071	PKN1; serine/threonine-protein kinase N1 [EC:2.7.11.13]
ENSCHIG00000023284	K06072	DOHH; deoxyhypusine monooxygenase [EC:1.14.99.29]
ENSCHIG00000026297	K06081	PVRL1, CD111; poliovirus receptor-related protein 1
ENSCHIG00000017657	K06083	WASF3; WAS protein family, member 3
ENSCHIG00000025764	K06085	SSX2IP, ADIP; synovial sarcoma, X breakpoint 2 interacting protein
ENSCHIG00000003972	K06086	SORBS1, SH3D5, PONSIN, CAP; sorbin and SH3 domain containing 1
ENSCHIG00000013526	K06086	SORBS1, SH3D5, PONSIN, CAP; sorbin and SH3 domain containing 1
ENSCHIG00000018068	K06086	SORBS1, SH3D5, PONSIN, CAP; sorbin and SH3 domain containing 1
ENSCHIG00000004105	K06087	CLDN; claudin
ENSCHIG00000004293	K06087	CLDN; claudin
[truncated: 5,503 more rows]

## Sheet: KO 
Gene_id	BaseMean	Log2FoldChange1	LfcSE	Stat	P-value	P-adj(FDR)	Pathway	Description
ENSCHIG00000024121	7003.36	5.73585	0.365934	15.6745	2.25873e-55	1.93636e-53	K01672	CA; carbonic anhydrase [EC:4.2.1.1]
ENSCHIG00000016311	5145.95	3.64577	0.235147	15.5042	3.24933e-54	2.64971e-52	K11188	PRDX6; peroxiredoxin 6, 1-Cys peroxiredoxin [EC:1.11.1.7 1.11.1.15 3.1.1.-]
ENSCHIG00000016188	3523.23	-11.4842	0.43199	-26.5845	1.02541e-155	1.55834e-152	K18245	CA2; carbonic anhydrase 2 [EC:4.2.1.1]
ENSCHIG00000015228	1946.27	8.53331	0.321971	26.5034	8.86751e-155	1.23532e-151	K04119	AKR1C3; aldo-keto reductase family 1 member C3 [EC:1.1.1.51 1.1.1.188 1.1.1.213 1.1.1.357]
ENSCHIG00000025654	1643.12	4.98258	0.37135	13.4175	4.77853e-41	2.10218e-39	K01641	E2.3.3.10; hydroxymethylglutaryl-CoA synthase [EC:2.3.3.10]
ENSCHIG00000017958	1033.95	2.70177	0.212607	12.7078	5.35256e-37	1.94519e-35	K07249	ALDH1A; retinal dehydrogenase [EC:1.2.1.36]
ENSCHIG00000018372	773.526	3.43535	0.129075	26.6151	4.54124e-156	7.59159e-153	K00016	LDH, ldh; L-lactate dehydrogenase [EC:1.1.1.27]
ENSCHIG00000013677	665.064	12.501	0.615123	20.3228	8.07917e-92	2.93608e-89	K00157	AOX; aldehyde oxidase [EC:1.2.3.1]
ENSCHIG00000013444	610.952	3.25579	0.22759	14.3055	2.02186e-46	1.15356e-44	K13811	PAPSS; 3'-phosphoadenosine 5'-phosphosulfate synthase [EC:2.7.7.4 2.7.1.25]
ENSCHIG00000017366	605.389	-3.98353	0.389106	-10.2376	1.34492e-24	2.4385e-23	K00432	gpx, btuE, bsaA; glutathione peroxidase [EC:1.11.1.9]
ENSCHIG00000024466	512.705	2.5337	0.217606	11.6435	2.47589e-31	6.70818e-30	K07508	ACAA2; acetyl-CoA acyltransferase 2 [EC:2.3.1.16]
ENSCHIG00000026804	508.707	2.23354	0.299932	7.44682	9.56155e-14	8.07683e-13	K01511	ENTPD5_6; ectonucleoside triphosphate diphosphohydrolase 5/6 [EC:3.6.1.6]
ENSCHIG00000013637	498.003	3.38766	0.199453	16.9848	1.06476e-64	1.29924e-62	K00022	HADH; 3-hydroxyacyl-CoA dehydrogenase [EC:1.1.1.35]
ENSCHIG00000020529	481.817	6.60113	0.508182	12.9897	1.39979e-38	5.46735e-37	K01672	CA; carbonic anhydrase [EC:4.2.1.1]
ENSCHIG00000010963	448.032	3.79168	0.184636	20.5359	1.02879e-93	4.09482e-91	K00799	GST, gst; glutathione S-transferase [EC:2.5.1.18]
ENSCHIG00000003090	380.129	-11.615	0.663298	-17.5109	1.1824e-68	1.8302e-66	K01623	ALDO; fructose-bisphosphate aldolase, class I [EC:4.1.2.13]
ENSCHIG00000000476	373.489	2.82869	0.139863	20.2247	5.93315e-91	2.02417e-88	K07511	ECHS1; enoyl-CoA hydratase [EC:4.2.1.17]
ENSCHIG00000010082	354.317	-12.055	0.759367	-15.875	9.43688e-57	8.43617e-55	K01047	PLA2G, SPLA2; secretory phospholipase A2 [EC:3.1.1.4]
ENSCHIG00000011701	329.61	11.7101	0.592971	19.7482	8.30955e-87	2.35442e-84	K04119	AKR1C3; aldo-keto reductase family 1 member C3 [EC:1.1.1.51 1.1.1.188 1.1.1.213 1.1.1.357]
ENSCHIG00000014286	297.841	7.07612	0.278089	25.4456	7.90299e-143	8.80762e-140	K02147	ATPeV1B, ATP6B; V-type H+-transporting ATPase subunit B
ENSCHIG00000023918	284.594	2.95962	0.182135	16.2496	2.24952e-59	2.26537e-57	K00939	adk, AK; adenylate kinase [EC:2.7.4.3]
ENSCHIG00000013439	279.603	4.69632	0.304293	15.4335	9.73803e-54	7.7152e-52	K00157	AOX; aldehyde oxidase [EC:1.2.3.1]
ENSCHIG00000011337	275.325	4.41621	0.308536	14.3134	1.80436e-46	1.033e-44	K04119	AKR1C3; aldo-keto reductase family 1 member C3 [EC:1.1.1.51 1.1.1.188 1.1.1.213 1.1.1.357]
ENSCHIG00000020284	274.741	11.4476	0.624333	18.3357	4.296e-75	8.75807e-73	K13952	ADH6; alcohol dehydrogenase 6 [EC:1.1.1.1]
ENSCHIG00000015607	266.46	9.18823	0.530372	17.3241	3.09389e-67	4.45867e-65	K04119	AKR1C3; aldo-keto reductase family 1 member C3 [EC:1.1.1.51 1.1.1.188 1.1.1.213 1.1.1.357]
ENSCHIG00000025853	257.731	2.16733	0.194208	11.1598	6.4136e-29	1.50584e-27	K08738	CYC; cytochrome c
ENSCHIG00000016878	254.355	11.3362	0.593479	19.1013	2.46167e-81	6.2351e-79	K04119	AKR1C3; aldo-keto reductase family 1 member C3 [EC:1.1.1.51 1.1.1.188 1.1.1.213 1.1.1.357]
ENSCHIG00000020720	241.714	-11.5032	0.72818	-15.7972	3.25009e-56	2.85957e-54	K01047	PLA2G, SPLA2; secretory phospholipase A2 [EC:3.1.1.4]
ENSCHIG00000004827	233.994	2.74918	0.229694	11.9689	5.17296e-33	1.51183e-31	K00079	CBR1; carbonyl reductase 1 [EC:1.1.1.184 1.1.1.189 1.1.1.197]
ENSCHIG00000026370	228.01	4.64176	0.306661	15.1364	9.31243e-52	6.82789e-50	K00019	E1.1.1.30, bdh; 3-hydroxybutyrate dehydrogenase [EC:1.1.1.30]
ENSCHIG00000004709	225.709	5.6426	0.317429	17.7759	1.08568e-70	1.85197e-68	K01672	CA; carbonic anhydrase [EC:4.2.1.1]
ENSCHIG00000023954	215.091	-2.8405	0.245176	-11.5856	4.87677e-31	1.29817e-29	K01895	ACSS1_2, acs; acetyl-CoA synthetase [EC:6.2.1.1]
ENSCHIG00000014858	203.59	2.41448	0.242444	9.95891	2.30574e-23	3.8661e-22	K13509	AGPAT1_2; lysophosphatidate acyltransferase [EC:2.3.1.51]
ENSCHIG00000015989	200.357	10.992	0.644914	17.0441	3.86694e-65	4.89725e-63	K13951	ADH1_7; alcohol dehydrogenase 1/7 [EC:1.1.1.1]
ENSCHIG00000016774	199.578	10.9863	0.60249	18.2348	2.73057e-74	5.18715e-72	K07437	CYP26A; cytochrome P450 family 26 subfamily A
ENSCHIG00000022836	192.067	4.72291	0.372152	12.6908	6.64993e-37	2.40101e-35	K00029	E1.1.1.40, maeB; malate dehydrogenase (oxaloacetate-decarboxylating)(NADP+) [EC:1.1.1.40]
ENSCHIG00000010543	182.108	-2.51443	0.225777	-11.1368	8.30712e-29	1.92608e-27	K00016	LDH, ldh; L-lactate dehydrogenase [EC:1.1.1.27]
ENSCHIG00000026143	181.683	5.94873	0.328138	18.1287	1.89063e-73	3.43539e-71	K00799	GST, gst; glutathione S-transferase [EC:2.5.1.18]
ENSCHIG00000026977	174.904	2.62317	0.22579	11.6177	3.34872e-31	8.97125e-30	K01640	E4.1.3.4, HMGCL, hmgL; hydroxymethylglutaryl-CoA lyase [EC:4.1.3.4]
ENSCHIG00000019906	169.572	-4.35057	0.492436	-8.83479	1.00284e-18	1.22907e-17	K00463	IDO, INDO; indoleamine 2,3-dioxygenase [EC:1.13.11.52]
ENSCHIG00000021527	155.978	4.86891	0.311453	15.6329	4.34749e-55	3.70801e-53	K04119	AKR1C3; aldo-keto reductase family 1 member C3 [EC:1.1.1.51 1.1.1.188 1.1.1.213 1.1.1.357]
ENSCHIG00000000508	153.596	5.94488	0.266378	22.3174	2.50327e-110	1.30772e-107	K01513	ENPP1_3, CD203; ectonucleotide pyrophosphatase/phosphodiesterase family member 1/3 [EC:3.1.4.1 3.6.1.9]
ENSCHIG00000017801	150.588	-3.84569	0.280419	-13.7141	8.3604e-43	4.02769e-41	K01940	argG, ASS1; argininosuccinate synthase [EC:6.3.4.5]
ENSCHIG00000024702	134.049	2.16377	0.21515	10.057	8.55595e-24	1.47454e-22	K01596	E4.1.1.32, pckA, PCK; phosphoenolpyruvate carboxykinase (GTP) [EC:4.1.1.32]
ENSCHIG00000003087	132.279	-2.31848	0.199544	-11.6189	3.30307e-31	8.86314e-30	K05304	NANS, SAS; sialic acid synthase [EC:2.5.1.56 2.5.1.57 2.5.1.132]
ENSCHIG00000026063	130.16	-2.50732	0.264796	-9.4689	2.82796e-21	4.12521e-20	K10203	ELOVL6; elongation of very long chain fatty acids protein 6 [EC:2.3.1.199]
ENSCHIG00000026715	128.159	2.38548	0.16246	14.6835	8.2247e-49	5.37079e-47	K01195	uidA, GUSB; beta-glucuronidase [EC:3.2.1.31]
ENSCHIG00000019198	121.529	5.07165	0.270378	18.7576	1.67686e-78	4.00458e-76	K16342	PLA2G4, CPLA2; cytosolic phospholipase A2 [EC:3.1.1.4]
ENSCHIG00000022245	121.417	2.46533	0.197521	12.4813	9.44006e-36	3.22719e-34	K07420	CYP2S1; cytochrome P450 family 2 subfamily S polypeptide 1 [EC:1.14.14.1]
ENSCHIG00000009359	120.789	2.45933	0.228463	10.7647	5.05524e-27	1.06033e-25	K00799	GST, gst; glutathione S-transferase [EC:2.5.1.18]
ENSCHIG00000009802	120.194	-2.41534	0.169835	-14.2217	6.72434e-46	3.73458e-44	#N/A
ENSCHIG00000000945	119.398	-4.65468	0.258509	-18.0059	1.75214e-72	3.11601e-70	K03376	SIAT7F, ST6GalNAc VI; N-acetylgalactosaminide alpha-2,6-sialyltransferase (sialyltransferase 7F) [EC:2.4.99.-]
ENSCHIG00000025030	119.034	10.2409	0.750516	13.6451	2.15947e-42	1.00837e-40	K00251	AKR1D1; 3-oxo-5-beta-steroid 4-dehydrogenase [EC:1.3.1.3]
ENSCHIG00000025600	113.899	-10.0562	0.663953	-15.146	8.05106e-52	5.92905e-50	K03479	SIAT7A, ST6GalNAc I; alpha-N-acetylgalactosaminide alpha-2,6-sialyltransferase (sialyltransferase 7A) [EC:2.4.99.3]
ENSCHIG00000025213	107.081	-2.20062	0.130385	-16.8778	6.54926e-64	7.60305e-62	K17108	GBA2; non-lysosomal glucosylceramidase [EC:3.2.1.45]
ENSCHIG00000003246	105.27	-2.11874	0.159356	-13.2956	2.45415e-40	1.0334e-38	K21749	CMAS; N-acylneuraminate/3-deoxy-D-glycero-D-galacto-nononate cytidylyltransferase [EC:2.7.7.43 2.7.7.92]
ENSCHIG00000012239	95.3723	4.13557	0.3501	11.8126	3.36207e-32	9.44599e-31	K13980	ADH4; alcohol dehydrogenase 4 [EC:1.1.1.1]
ENSCHIG00000018327	87.8099	2.00731	0.14987	13.3937	6.58235e-41	2.87303e-39	K01759	GLO1, gloA; lactoylglutathione lyase [EC:4.4.1.5]
ENSCHIG00000014663	87.1487	9.56908	0.664693	14.3963	5.4624e-47	3.20403e-45	K00757	udp, UPP; uridine phosphorylase [EC:2.4.2.3]
ENSCHIG00000025257	86.6609	2.9071	0.22883	12.7042	5.60635e-37	2.0286e-35	K11205	GCLM; glutamate--cysteine ligase regulatory subunit
ENSCHIG00000026507	83.8084	-2.98057	0.403486	-7.38705	1.50126e-13	1.24364e-12	K18246	CA4; carbonic anhydrase 4 [EC:4.2.1.1]
ENSCHIG00000021744	77.554	-2.9519	0.303195	-9.736	2.11723e-22	3.32648e-21	K01895	ACSS1_2, acs; acetyl-CoA synthetase [EC:6.2.1.1]
ENSCHIG00000019693	76.9043	2.48187	0.268461	9.2448	2.35671e-20	3.21347e-19	K17720	CYP2C18; cytochrome P450 family 2 subfamily C polypeptide 18 [EC:1.14.14.1]
ENSCHIG00000010651	76.743	3.74078	0.20096	18.6145	2.45057e-77	5.53596e-75	K19970	NT5E, CD73; 5'-nucleotidase [EC:3.1.3.5]
ENSCHIG00000021573	76.5032	3.62205	0.199561	18.1501	1.28216e-73	2.35538e-71	K00084	CBR3; carbonyl reductase 3 [EC:1.1.1.184]
ENSCHIG00000012912	73.1884	-3.40343	0.235422	-14.4567	2.27405e-47	1.35286e-45	K03374	SIAT7D, ST6GalNAc IV; N-acetylgalactosaminide alpha-2,6-sialyltransferase (sialyltransferase 7D) [EC:2.4.99.7]
ENSCHIG00000012120	73.0793	5.92631	0.371468	15.9538	2.68243e-57	2.47747e-55	K01077	E3.1.3.1, phoA, phoB; alkaline phosphatase [EC:3.1.3.1]
ENSCHIG00000014280	72.7948	-2.26831	0.235547	-9.62998	5.9739e-22	9.11184e-21	K00819	rocD, OAT; ornithine--oxo-acid transaminase [EC:2.6.1.13]
ENSCHIG00000003073	69.9823	3.30531	0.155723	21.2256	5.53825e-100	2.50224e-97	#N/A
ENSCHIG00000022749	68.8287	2.10448	0.187732	11.2101	3.63881e-29	8.70242e-28	K01092	E3.1.3.25, IMPA, suhB; myo-inositol-1(or 4)-monophosphatase [EC:3.1.3.25]
ENSCHIG00000004358	68.6284	-6.9173	0.527061	-13.1243	2.3906e-39	9.62981e-38	K00071	HSD11B2; corticosteroid 11-beta-dehydrogenase isozyme 2 [EC:1.1.1.-]
ENSCHIG00000009050	68.5566	3.48016	0.256117	13.5882	4.70664e-42	2.14975e-40	K16342	PLA2G4, CPLA2; cytosolic phospholipase A2 [EC:3.1.1.4]
ENSCHIG00000017623	66.2601	-6.51948	0.511379	-12.7488	3.16542e-37	1.16045e-35	K04628	CGT, UGT8; ceramide galactosyltransferase [EC:2.4.1.47]
ENSCHIG00000008125	64.6385	4.45098	0.293142	15.1837	4.5328e-52	3.3828e-50	K11529	gck, gckA, GLYCTK; glycerate 2-kinase [EC:2.7.1.165]
ENSCHIG00000019728	63.4579	2.87111	0.145256	19.7659	5.85417e-87	1.68731e-84	K00922	PIK3CA_B_D; phosphatidylinositol-4,5-bisphosphate 3-kinase catalytic subunit alpha/beta/delta [EC:2.7.1.153]
ENSCHIG00000009936	61.7405	-3.54101	0.235084	-15.0627	2.84837e-51	2.02622e-49	K00994	CHPT1, CPT1; diacylglycerol cholinephosphotransferase [EC:2.7.8.2]
ENSCHIG00000022314	61.6267	-4.69189	0.254	-18.472	3.46672e-76	7.52638e-74	K10224	FADS1; acyl-CoA (8-3)-desaturase (Delta-5 desaturase) [EC:1.14.19.44]
ENSCHIG00000020729	61.5721	2.09486	0.357858	5.85387	4.80255e-09	2.60156e-08	K00128	ALDH; aldehyde dehydrogenase (NAD+) [EC:1.2.1.3]
ENSCHIG00000010402	60.5397	3.05023	0.27703	11.0105	3.40217e-28	7.60349e-27	K03783	punA, PNP; purine-nucleoside phosphorylase [EC:2.4.2.1]
ENSCHIG00000022339	59.9733	-9.31114	0.788872	-11.8031	3.76193e-32	1.05517e-30	K01047	PLA2G, SPLA2; secretory phospholipase A2 [EC:3.1.1.4]
ENSCHIG00000022769	56.9584	4.67169	0.472267	9.89204	4.5075e-23	7.39469e-22	K13241	NOS2; nitric-oxide synthase, inducible [EC:1.14.13.39]
ENSCHIG00000004184	56.6609	-9.04796	0.639343	-14.152	1.81593e-45	9.79254e-44	K01596	E4.1.1.32, pckA, PCK; phosphoenolpyruvate carboxykinase (GTP) [EC:4.1.1.32]
ENSCHIG00000026712	56.6377	9.17031	0.633997	14.4643	2.03679e-47	1.21603e-45	K16342	PLA2G4, CPLA2; cytosolic phospholipase A2 [EC:3.1.1.4]
ENSCHIG00000000324	54.6542	2.69283	0.359176	7.49725	6.51721e-14	5.56142e-13	K00548	metH, MTR; 5-methyltetrahydrofolate--homocysteine methyltransferase [EC:2.1.1.13]
ENSCHIG00000021854	54.3637	-2.11374	0.197801	-10.6862	1.18127e-26	2.42595e-25	K00820	glmS, GFPT; glutamine---fructose-6-phosphate transaminase (isomerizing) [EC:2.6.1.16]
ENSCHIG00000007488	53.8476	-2.33562	0.198539	-11.764	5.98083e-32	1.66914e-30	K00717	FUT8; glycoprotein 6-alpha-L-fucosyltransferase [EC:2.4.1.68]
ENSCHIG00000025785	51.1072	2.09552	0.19042	11.0047	3.62591e-28	8.0927e-27	K00297	metF, MTHFR; methylenetetrahydrofolate reductase (NADPH) [EC:1.5.1.20]
ENSCHIG00000023093	48.4436	2.00573	0.35541	5.64342	1.66702e-08	8.49879e-08	K01015	SULT2B1; alcohol sulfotransferase [EC:2.8.2.2]
ENSCHIG00000007800	47.4144	-2.07202	0.16203	-12.7878	1.91715e-37	7.10622e-36	K13811	PAPSS; 3'-phosphoadenosine 5'-phosphosulfate synthase [EC:2.7.7.4 2.7.1.25]
ENSCHIG00000022508	46.6728	-2.79915	0.203339	-13.766	4.08422e-43	1.99055e-41	K01897	ACSL, fadD; long-chain acyl-CoA synthetase [EC:6.2.1.3]
ENSCHIG00000011217	45.702	-3.537	0.252802	-13.9912	1.76447e-44	9.04807e-43	K00939	adk, AK; adenylate kinase [EC:2.7.4.3]
ENSCHIG00000015669	45.5263	-2.57981	0.28014	-9.209	3.29192e-20	4.45957e-19	K23790	GSTP; glutathione S-transferase P [EC:2.5.1.18]
ENSCHIG00000009873	45.4803	-4.67665	0.349378	-13.3856	7.33676e-41	3.19397e-39	K12320	GUCY2C; heat-stable enterotoxin receptor [EC:4.6.1.2]
ENSCHIG00000012389	44.9232	-5.74328	0.378009	-15.1935	3.90546e-52	2.9277e-50	K00911	ITPK; 1D-myo-inositol-triphosphate 3-kinase [EC:2.7.1.127]
ENSCHIG00000020938	43.5726	-9.03136	0.68521	-13.1804	1.13747e-39	4.66056e-38	K00699	UGT; glucuronosyltransferase [EC:2.4.1.17]
ENSCHIG00000024614	43.43	2.52676	0.316366	7.98684	1.38443e-15	1.3654e-14	K15729	PTGES; microsomal prostaglandin-E synthase 1 [EC:5.3.99.3]
ENSCHIG00000015889	41.0004	-8.9442	0.655791	-13.6388	2.35411e-42	1.09013e-40	K12047	MGAM; maltase-glucoamylase [EC:3.2.1.20 3.2.1.3]
ENSCHIG00000027133	40.2859	4.49487	0.263589	17.0526	3.34463e-65	4.30094e-63	K01489	cdd, CDA; cytidine deaminase [EC:3.5.4.5]
ENSCHIG00000007275	37.4703	-2.16565	0.173186	-12.5048	7.03098e-36	2.41349e-34	K01950	E6.3.5.1, NADSYN1, QNS1, nadE; NAD+ synthase (glutamine-hydrolysing) [EC:6.3.5.1]
ENSCHIG00000012435	37.0553	-2.46311	0.35084	-7.02061	2.20903e-12	1.67628e-11	K01672	CA; carbonic anhydrase [EC:4.2.1.1]
ENSCHIG00000017272	36.6596	8.09504	0.614304	13.1776	1.18106e-39	4.82735e-38	K02148	ATPeV1C, ATP6C; V-type H+-transporting ATPase subunit C
ENSCHIG00000017496	36.4961	-4.34395	0.261733	-16.5969	7.33703e-62	8.01655e-60	K13761	PDE9; high affinity cGMP-specific 3',5'-cyclic phosphodiesterase 9 [EC:3.1.4.35]
ENSCHIG00000024307	35.5789	-4.03869	0.376973	-10.7135	8.79731e-27	1.81114e-25	K00710	GALNT; polypeptide N-acetylgalactosaminyltransferase [EC:2.4.1.41]
ENSCHIG00000021110	34.9065	-2.76756	0.214232	-12.9185	3.5376e-38	1.35018e-36	K01724	PCBD, phhB; 4a-hydroxytetrahydrobiopterin dehydratase [EC:4.2.1.96]
ENSCHIG00000015013	34.8775	-4.03737	0.262753	-15.3657	2.7821e-53	2.15316e-51	K00889	PIP5K; 1-phosphatidylinositol-4-phosphate 5-kinase [EC:2.7.1.68]
ENSCHIG00000010240	34.646	-8.70095	0.68649	-12.6746	8.18181e-37	2.94141e-35	K01203	SI; sucrase-isomaltase [EC:3.2.1.48 3.2.1.10]
ENSCHIG00000026618	34.3404	-2.97834	0.201158	-14.8059	1.34113e-49	8.96784e-48	K12409	GNE; bifunctional UDP-N-acetylglucosamine 2-epimerase / N-acetylmannosamine kinase [EC:3.2.1.183 2.7.1.60]
ENSCHIG00000009653	34.144	3.93843	0.326283	12.0706	1.51072e-33	4.55039e-32	K20967	MOCS1; GTP 3',8-cyclase / cyclic pyranopterin monophosphate synthase [EC:4.1.99.22 4.6.1.17]
ENSCHIG00000025871	33.4322	3.41711	0.233643	14.6254	1.93547e-48	1.22558e-46	K11416	SIRT6, SIR2L6; NAD+-dependent protein deacetylase sirtuin 6 [EC:2.3.1.286]
ENSCHIG00000024608	32.5505	-5.8945	0.453157	-13.0076	1.10717e-38	4.34472e-37	K00044	HSD17B1; 17beta-estradiol 17-dehydrogenase [EC:1.1.1.62]
ENSCHIG00000021209	30.5925	3.3568	0.245078	13.6969	1.05993e-42	5.07702e-41	#N/A
ENSCHIG00000017922	30.1989	3.19627	0.318878	10.0235	1.20182e-23	2.05217e-22	K08718	PDE6A; rod cGMP-specific 3',5'-cyclic phosphodiesterase subunit alpha [EC:3.1.4.35]
ENSCHIG00000003874	30.0475	-2.11371	0.394273	-5.36103	8.27495e-08	3.88465e-07	K01242	CD38; ADP-ribosyl cyclase 1 [EC:3.2.2.6 2.4.99.20]
ENSCHIG00000015696	29.944	-8.49007	0.674053	-12.5956	2.23363e-36	7.87757e-35	K13485	PRHOXNB, URAD; 2-oxo-4-hydroxy-4-carboxy-5-ureidoimidazoline decarboxylase [EC:4.1.1.97]
ENSCHIG00000023493	28.1144	-2.3873	0.222092	-10.7492	5.98082e-27	1.2451e-25	K05858	PLCB; phosphatidylinositol phospholipase C, beta [EC:3.1.4.11]
ENSCHIG00000001958	27.2086	3.32627	0.236783	14.0478	7.95203e-45	4.16721e-43	K15631	ABA3; molybdenum cofactor sulfurtransferase [EC:2.8.1.9]
ENSCHIG00000009677	26.9283	-2.76961	0.248876	-11.1285	9.11849e-29	2.10253e-27	K13296	PDE3B; cGMP-inhibited 3',5'-cyclic phosphodiesterase B [EC:3.1.4.17]
ENSCHIG00000011975	26.8338	2.32316	0.328118	7.08024	1.43904e-12	1.10859e-11	K03783	punA, PNP; purine-nucleoside phosphorylase [EC:2.4.2.1]
ENSCHIG00000008602	26.8011	-6.05395	0.520317	-11.6351	2.73206e-31	7.36641e-30	K09663	GCNT4; beta-1,6-N-acetylglucosaminyltransferase 4 [EC:2.4.1.-]
ENSCHIG00000012393	26.7939	-2.38291	0.42976	-5.54474	2.94388e-08	1.46076e-07	K00844	HK; hexokinase [EC:2.7.1.1]
ENSCHIG00000009100	26.7433	2.66549	0.262429	10.157	3.08379e-24	5.47259e-23	K07424	CYP3A; cytochrome P450 family 3 subfamily A [EC:1.14.14.1]
ENSCHIG00000015994	26.6214	2.25265	0.273922	8.2237	1.97317e-16	2.05645e-15	K22284	LIPG; endothelial lipase [EC:3.1.1.3]
ENSCHIG00000011773	26.5848	3.23742	0.214283	15.1081	1.43104e-51	1.03561e-49	K00016	LDH, ldh; L-lactate dehydrogenase [EC:1.1.1.27]
ENSCHIG00000013332	26.0703	-2.24917	0.28996	-7.75683	8.70801e-15	7.97653e-14	K01490	AMPD; AMP deaminase [EC:3.5.4.6]
ENSCHIG00000001672	25.1927	-4.02944	0.279516	-14.4158	4.11685e-47	2.44047e-45	K08748	SLC27A5, FATP5; solute carrier family 27 (fatty acid transporter), member 5 [EC:6.2.1.7]
ENSCHIG00000015460	24.6063	-4.30561	0.412636	-10.4344	1.72718e-25	3.32259e-24	K10226	FADS2; acyl-CoA 6-desaturase (Delta-6 desaturase) [EC:1.14.19.3]
ENSCHIG00000011914	24.4388	-5.01779	0.458771	-10.9375	7.62995e-28	1.65649e-26	K01510	ENTPD1_3_8, CD39; apyrase [EC:3.6.1.5]
ENSCHIG00000025100	23.7198	2.61653	0.329125	7.94995	1.86591e-15	1.82305e-14	K05857	PLCD; phosphatidylinositol phospholipase C, delta [EC:3.1.4.11]
ENSCHIG00000025267	23.6236	-7.78324	0.630185	-12.3507	4.82733e-35	1.58855e-33	K00710	GALNT; polypeptide N-acetylgalactosaminyltransferase [EC:2.4.1.41]
ENSCHIG00000016550	23.2902	7.66279	0.685146	11.1842	4.87507e-29	1.15762e-27	K01047	PLA2G, SPLA2; secretory phospholipase A2 [EC:3.1.1.4]
ENSCHIG00000024716	23.026	-2.48769	0.271303	-9.16941	4.75621e-20	6.38632e-19	K19006	PLCH; phosphatidylinositol phospholipase C, eta [EC:3.1.4.11]
ENSCHIG00000024473	22.529	3.36211	0.275819	12.1896	3.53273e-34	1.10593e-32	K13273	PMVK; phosphomevalonate kinase [EC:2.7.4.2]
ENSCHIG00000021799	22.5187	2.00532	0.230283	8.70807	3.09087e-18	3.67497e-17	K00780	SIAT4A; beta-galactoside alpha-2,3-sialyltransferase (sialyltransferase 4A) [EC:2.4.99.4]
ENSCHIG00000009525	22.4331	2.37753	0.344947	6.89244	5.48434e-12	4.05313e-11	K11431	SETD7; [histone H3]-lysine4 N-trimethyltransferase SETD7 [EC:2.1.1.354]
ENSCHIG00000024247	21.6238	5.0107	0.579713	8.64341	5.45593e-18	6.32941e-17	K08069	VNN; pantetheine hydrolase [EC:3.5.1.92]
ENSCHIG00000024519	20.7765	-3.48968	0.320813	-10.8776	1.4733e-27	3.14951e-26	K01896	ACSM; medium-chain acyl-CoA synthetase [EC:6.2.1.2]
ENSCHIG00000022550	20.4984	2.14908	0.278622	7.71324	1.2266e-14	1.10754e-13	#N/A
ENSCHIG00000022874	20.4025	-2.87961	0.311391	-9.24754	2.29711e-20	3.13476e-19	K08045	ADCY5; adenylate cyclase 5 [EC:4.6.1.1]
ENSCHIG00000018278	20.0815	-2.26954	0.194223	-11.6852	1.51736e-31	4.16515e-30	K01689	ENO, eno; enolase [EC:4.2.1.11]
ENSCHIG00000018016	19.8823	2.30409	0.251838	9.1491	5.74099e-20	7.67777e-19	K06616	SIAT7B, ST6GalNAc II; alpha-N-acetylgalactosaminide alpha-2,6-sialyltransferase (sialyltransferase 7B) [EC:2.4.99.-]
ENSCHIG00000008361	19.4528	7.62629	0.615354	12.3933	2.83987e-35	9.4382e-34	K01441	ACER1_2, ASAH3; alkaline ceramidase [EC:3.5.1.23]
ENSCHIG00000023475	19.3964	2.33782	0.293366	7.96895	1.60024e-15	1.5736e-14	K00831	serC, PSAT1; phosphoserine aminotransferase [EC:2.6.1.52]
ENSCHIG00000013689	19.2232	-7.30028	0.583088	-12.52	5.80031e-36	2.00753e-34	K01593	DDC, TDC; aromatic-L-amino-acid/L-tryptophan decarboxylase [EC:4.1.1.28 4.1.1.105]
ENSCHIG00000010567	18.8617	3.35092	0.2875	11.6554	2.15447e-31	5.86586e-30	K01509	ENTPD2; adenosinetriphosphatase [EC:3.6.1.3]
ENSCHIG00000014174	17.9435	-2.97471	0.310078	-9.59341	8.52177e-22	1.27995e-20	K10214	ACOX2; 3alpha,7alpha,12alpha-trihydroxy-5beta-cholestanoyl-CoA 24-hydroxylase [EC:1.17.99.3]
ENSCHIG00000022515	17.5457	-2.2266	0.222269	-10.0176	1.27598e-23	2.17216e-22	K18201	AGPHD1; hydroxylysine kinase [EC:2.7.1.81]
ENSCHIG00000008640	17.0874	2.22732	0.200971	11.0828	1.52036e-28	3.46266e-27	K10572	IPPK; inositol-pentakisphosphate 2-kinase [EC:2.7.1.158]
ENSCHIG00000024549	16.0018	-7.58793	0.626533	-12.111	9.23695e-34	2.8281e-32	K08041	ADCY1; adenylate cyclase 1 [EC:4.6.1.1]
ENSCHIG00000023411	15.8476	5.24075	0.475965	11.0108	3.38971e-28	7.59432e-27	#N/A
ENSCHIG00000024664	15.6544	-2.47544	0.24913	-9.93636	2.89191e-23	4.8008e-22	K01513	ENPP1_3, CD203; ectonucleotide pyrophosphatase/phosphodiesterase family member 1/3 [EC:3.1.4.1 3.6.1.9]
ENSCHIG00000017276	14.7909	7.23417	0.818223	8.84132	9.45947e-19	1.16104e-17	K00106	XDH; xanthine dehydrogenase/oxidase [EC:1.17.1.4 1.17.3.2]
ENSCHIG00000013738	14.7365	-7.09823	0.561518	-12.6412	1.25203e-36	4.45321e-35	K00779	SIAT2, ST6GAL2; beta-galactoside alpha-2,6-sialyltransferase (sialyltransferase 2) [EC:2.4.99.1]
ENSCHIG00000002050	14.1203	7.1629	0.587805	12.1858	3.69808e-34	1.15553e-32	K19006	PLCH; phosphatidylinositol phospholipase C, eta [EC:3.1.4.11]
ENSCHIG00000019407	13.552	-3.62821	0.361888	-10.0258	1.17422e-23	2.0071e-22	K01672	CA; carbonic anhydrase [EC:4.2.1.1]
ENSCHIG00000021591	13.5116	-2.91297	0.313789	-9.28321	1.64446e-20	2.26445e-19	K03370	SIAT9; lactosylceramide alpha-2,3-sialyltransferase (sialyltransferase 9) [EC:2.4.99.9]
ENSCHIG00000003265	13.2413	-6.20809	0.622098	-9.97927	1.87835e-23	3.16536e-22	K00739	B3GNT6; acetylgalactosaminyl-O-glycosyl-glycoprotein beta-1,3-N-acetylglucosaminyltransferase [EC:2.4.1.147]
ENSCHIG00000024836	13.204	-7.12633	0.68091	-10.4659	1.23896e-25	2.39997e-24	K00659	BAAT; bile acid-CoA:amino acid N-acyltransferase [EC:2.3.1.65 3.1.2.2]
ENSCHIG00000011083	12.5718	-2.50696	0.340465	-7.36335	1.79353e-13	1.48135e-12	K16817	PLA2G16; HRAS-like suppressor 3 [EC:3.1.1.32 3.1.1.4]
ENSCHIG00000017266	12.435	-3.8725	0.406351	-9.52993	1.57396e-21	2.32232e-20	K00710	GALNT; polypeptide N-acetylgalactosaminyltransferase [EC:2.4.1.41]
ENSCHIG00000012632	12.3972	-2.06747	0.434758	-4.75544	1.98014e-06	7.8422e-06	K03494	SIAT4C; beta-galactoside alpha-2,3-sialyltransferase (sialyltransferase 4C) [EC:2.4.99.4]
ENSCHIG00000025317	12.2913	4.09828	0.780845	5.24852	1.53328e-07	6.98224e-07	K13980	ADH4; alcohol dehydrogenase 4 [EC:1.1.1.1]
ENSCHIG00000011623	11.8765	-4.23672	0.371454	-11.4058	3.91311e-30	9.95669e-29	K02153	ATPeV0E, ATP6H; V-type H+-transporting ATPase subunit e
ENSCHIG00000009216	11.7928	2.60005	0.381393	6.81724	9.28056e-12	6.74535e-11	K07964	HPSE; heparanase [EC:3.2.1.166]
ENSCHIG00000009573	11.4593	-2.44962	0.233907	-10.4726	1.15408e-25	2.24857e-24	K13517	MBOAT1_2; lysophospholipid acyltransferase 1/2 [EC:2.3.1.51 2.3.1.-]
ENSCHIG00000001864	10.9457	-6.85426	0.632806	-10.8315	2.44057e-27	5.1514e-26	K00710	GALNT; polypeptide N-acetylgalactosaminyltransferase [EC:2.4.1.41]
ENSCHIG00000026364	10.8173	2.22273	0.247961	8.96404	3.12986e-19	3.99708e-18	K00552	GNMT; glycine N-methyltransferase [EC:2.1.1.20]
ENSCHIG00000026349	10.5989	-2.39544	0.295743	-8.09973	5.50793e-16	5.59733e-15	K00819	rocD, OAT; ornithine--oxo-acid transaminase [EC:2.6.1.13]
ENSCHIG00000020454	10.4586	-4.64927	0.494656	-9.39901	5.50773e-21	7.87619e-20	K00767	nadC, QPRT; nicotinate-nucleotide pyrophosphorylase (carboxylating) [EC:2.4.2.19]
ENSCHIG00000011772	10.4543	-6.9717	0.667637	-10.4424	1.58827e-25	3.05889e-24	K14075	PNLIPRP2, PLRP2; pancreatic lipase-related protein 2 [EC:3.1.1.3]
ENSCHIG00000010320	10.4335	2.93419	0.500354	5.86423	4.51234e-09	2.45071e-08	K11160	DGAT2; diacylglycerol O-acyltransferase 2 [EC:2.3.1.20 2.3.1.75]
ENSCHIG00000022069	10.1111	6.68472	0.642164	10.4097	2.23982e-25	4.27922e-24	K01476	E3.5.3.1, rocF, arg; arginase [EC:3.5.3.1]
ENSCHIG00000022161	9.95267	-2.41231	0.259641	-9.29094	1.52936e-20	2.11641e-19	K01958	PC, pyc; pyruvate carboxylase [EC:6.4.1.1]
ENSCHIG00000017842	9.56242	-4.88989	0.481441	-10.1568	3.09129e-24	5.48008e-23	K04714	SGMS; shingomyelin synthase [EC:2.7.8.27]
ENSCHIG00000007017	8.99897	-2.43896	0.687443	-3.54787	0.000388355	0.0010804	K07965	HPSE2; heparanase 2 [EC:3.2.1.-]
ENSCHIG00000019978	8.3191	-2.59392	0.354462	-7.31791	2.51866e-13	2.05588e-12	K12352	SMPD3; sphingomyelin phosphodiesterase 3 [EC:3.1.4.12]
ENSCHIG00000023900	8.12593	3.63327	0.475997	7.63297	2.29404e-14	2.02586e-13	K01510	ENTPD1_3_8, CD39; apyrase [EC:3.6.1.5]
ENSCHIG00000026472	7.88553	-3.11083	0.401869	-7.74092	9.87011e-15	8.99175e-14	K01480	speB; agmatinase [EC:3.5.3.11]
ENSCHIG00000020433	7.3588	3.04208	0.443169	6.86438	6.67799e-12	4.91572e-11	K18152	BST1, CD157; ADP-ribosyl cyclase 2 [EC:3.2.2.6 2.4.99.20]
ENSCHIG00000022129	7.3545	-6.281	0.583881	-10.7573	5.47379e-27	1.14382e-25	K03371	SIAT8A; alpha-N-acetyl-neuraminate alpha-2,8-sialyltransferase (sialyltransferase 8A) [EC:2.4.99.8]
ENSCHIG00000021041	7.09507	3.36445	0.611719	5.49999	3.79802e-08	1.85974e-07	K00456	CDO1; cysteine dioxygenase [EC:1.13.11.20]
ENSCHIG00000023150	6.9051	-2.54597	0.294331	-8.65003	5.14881e-18	5.98558e-17	#N/A
ENSCHIG00000023218	6.56802	6.06424	0.753661	8.04637	8.5284e-16	8.5422e-15	K01544	ATP12A; non-gastric H+/K+-exchanging ATPase [EC:7.2.2.19]
ENSCHIG00000011935	6.53179	5.59076	0.596993	9.36487	7.61419e-21	1.07687e-19	#N/A
ENSCHIG00000010678	6.44472	-3.80426	0.453395	-8.39059	4.83709e-17	5.24395e-16	K00844	HK; hexokinase [EC:2.7.1.1]
ENSCHIG00000024279	6.34046	2.926	0.490342	5.96725	2.41286e-09	1.34632e-08	K13952	ADH6; alcohol dehydrogenase 6 [EC:1.1.1.1]
ENSCHIG00000011667	6.27482	5.53132	0.751571	7.35968	1.84356e-13	1.51967e-12	K00079	CBR1; carbonyl reductase 1 [EC:1.1.1.184 1.1.1.189 1.1.1.197]
ENSCHIG00000016166	6.09956	-5.06337	0.787108	-6.43288	1.2521e-10	8.16674e-10	#N/A
ENSCHIG00000019158	6.09772	2.2875	0.376024	6.08337	1.17681e-09	6.85703e-09	K00923	PIK3C2; phosphatidylinositol-4-phosphate 3-kinase [EC:2.7.1.154]
ENSCHIG00000026999	6.04337	-2.43702	0.360967	-6.75135	1.46476e-11	1.04242e-10	K00807	LTC4S; leukotriene-C4 synthase [EC:4.4.1.20]
ENSCHIG00000002685	5.9107	-2.25177	0.348193	-6.46703	9.99495e-11	6.57817e-10	K10250	ELOVL7; elongation of very long chain fatty acids protein 7 [EC:2.3.1.199]
ENSCHIG00000018610	5.85815	5.89935	0.700521	8.42138	3.72069e-17	4.06794e-16	K08022	ALOX15B; arachidonate 15-lipoxygenase (second type) / 8-lipoxygenase (S-type) [EC:1.13.11.33 1.13.11.-]
ENSCHIG00000021493	5.83713	-6.13305	0.738628	-8.3033	1.01258e-16	1.07886e-15	K01672	CA; carbonic anhydrase [EC:4.2.1.1]
ENSCHIG00000025469	5.81994	2.92592	0.520467	5.62171	1.89074e-08	9.56934e-08	K13506	GPAT3_4, AGPAT9, AGPAT6; glycerol-3-phosphate O-acyltransferase 3/4 [EC:2.3.1.15]
ENSCHIG00000017259	5.64042	2.78456	0.523208	5.32209	1.02582e-07	4.76664e-07	K10249	ELOVL4; elongation of very long chain fatty acids protein 4 [EC:2.3.1.199]
ENSCHIG00000005257	5.48623	-2.4729	0.728995	-3.3922	0.00069335	0.00184831	K07820	B3GALT2; beta-1,3-galactosyltransferase 2 [EC:2.4.1.86]
ENSCHIG00000025960	5.40292	-2.18867	0.371875	-5.8855	3.96856e-09	2.17089e-08	K07249	ALDH1A; retinal dehydrogenase [EC:1.2.1.36]
ENSCHIG00000026508	5.36046	5.77503	0.613965	9.40613	5.1474e-21	7.37353e-20	K11153	RDH12; retinol dehydrogenase 12 [EC:1.1.1.300]
ENSCHIG00000026459	5.22137	5.73189	0.991281	5.78231	7.36811e-09	3.90652e-08	K16342	PLA2G4, CPLA2; cytosolic phospholipase A2 [EC:3.1.1.4]
ENSCHIG00000025546	5.17818	5.72352	0.796427	7.1865	6.64749e-13	5.27414e-12	K04710	CERS1_2_3_4, LASS1_2_3_4; ceramide synthetase [EC:2.3.1.24]
ENSCHIG00000009239	4.40965	3.65651	0.550727	6.63942	3.14928e-11	2.18359e-10	K07436	CYP24A1; vitamin D3 24-hydroxylase [EC:1.14.15.16]
ENSCHIG00000011546	4.05048	-5.41321	0.631916	-8.56635	1.06818e-17	1.21227e-16	K00306	PIPOX; sarcosine oxidase / L-pipecolate oxidase [EC:1.5.3.1 1.5.3.7]
ENSCHIG00000015404	4.04073	4.19307	0.613593	6.83363	8.27942e-12	6.0387e-11	K18311	RIMKLA, NAAGS-II; N-acetylaspartylglutamate/N-acetylaspartylglutamylglutamate synthase [EC:6.3.2.41 6.3.2.42]
ENSCHIG00000021685	4.01394	-5.59343	0.710825	-7.86893	3.57693e-15	3.40902e-14	K09673	CHST9; carbohydrate 4-sulfotransferase 9 [EC:2.8.2.-]
ENSCHIG00000012869	3.76902	4.78276	0.699989	6.83261	8.3381e-12	6.07885e-11	K13534	PNPLA3; patatin-like phospholipase domain-containing protein 3 [EC:3.1.1.3 2.3.1.-]
ENSCHIG00000026316	3.76784	5.02097	0.704825	7.12372	1.05055e-12	8.19893e-12	K04119	AKR1C3; aldo-keto reductase family 1 member C3 [EC:1.1.1.51 1.1.1.188 1.1.1.213 1.1.1.357]
ENSCHIG00000010819	3.74082	3.05493	0.508287	6.01024	1.85244e-09	1.05039e-08	K00799	GST, gst; glutathione S-transferase [EC:2.5.1.18]
ENSCHIG00000014679	3.70348	-2.16236	0.410515	-5.26742	1.38354e-07	6.3453e-07	#N/A
ENSCHIG00000023960	3.69948	-5.27936	0.73695	-7.1638	7.84734e-13	6.18501e-12	K23756	ACSM1, LAE; medium-chain acyl-CoA ligase / lipoate-activating enzyme [EC:6.2.1.2]
ENSCHIG00000006056	3.4508	2.63685	0.466155	5.65659	1.54409e-08	7.91308e-08	#N/A
ENSCHIG00000024701	3.22182	4.78871	0.607363	7.88442	3.15995e-15	3.02029e-14	K00933	E2.7.3.2; creatine kinase [EC:2.7.3.2]
ENSCHIG00000017969	3.22065	2.52552	0.636635	3.96699	7.2786e-05	0.00022928	K11149	DHRS9; dehydrogenase/reductase SDR family member 9 [EC:1.1.-.-]
ENSCHIG00000001947	2.9659	-4.76118	0.626498	-7.59967	2.96877e-14	2.59702e-13	K00272	DDO; D-aspartate oxidase [EC:1.4.3.1]
ENSCHIG00000007647	2.74531	3.37868	0.667048	5.06512	4.08142e-07	1.75893e-06	K00939	adk, AK; adenylate kinase [EC:2.7.4.3]
ENSCHIG00000010431	2.62107	-4.97395	0.702427	-7.08109	1.43021e-12	1.1028e-11	K01047	PLA2G, SPLA2; secretory phospholipase A2 [EC:3.1.1.4]
ENSCHIG00000025470	2.59045	-2.40877	0.463208	-5.20019	1.9908e-07	8.93669e-07	K00939	adk, AK; adenylate kinase [EC:2.7.4.3]
ENSCHIG00000006078	2.44807	-2.73351	0.513233	-5.32605	1.00371e-07	4.67122e-07	K12406	PKLR; pyruvate kinase isozymes R/L [EC:2.7.1.40]
ENSCHIG00000023872	2.23967	-4.12914	0.602403	-6.85445	7.15869e-12	5.24876e-11	K10251	HSD17B12, KAR, IFA38; 17beta-estradiol 17-dehydrogenase / very-long-chain 3-oxoacyl-CoA reductase [EC:1.1.1.62 1.1.1.330]
ENSCHIG00000023502	2.14177	2.51287	0.585596	4.29113	1.77767e-05	6.14627e-05	K08042	ADCY2; adenylate cyclase 2 [EC:4.6.1.1]
ENSCHIG00000000421	1.90665	-2.15202	0.531569	-4.04843	5.15613e-05	0.000166143	K07553	B4GALT6; beta-1,4-galactosyltransferase 6 [EC:2.4.1.274]
ENSCHIG00000009411	1.67999	-2.36688	0.788927	-3.00013	0.00269865	0.00644107	K00789	metK; S-adenosylmethionine synthetase [EC:2.5.1.6]
ENSCHIG00000022813	1.62869	3.04417	0.791125	3.84791	0.000119132	0.000362096	K08021	ALOX12B; arachidonate 12-lipoxygenase (R-type) [EC:1.13.11.-]
ENSCHIG00000023934	1.51899	-3.10671	0.605935	-5.12714	2.94184e-07	1.2918e-06	K01468	hutI, AMDHD1; imidazolonepropionase [EC:3.5.2.7]
ENSCHIG00000014412	1.42236	-2.77232	0.618788	-4.48025	7.45563e-06	2.73264e-05	K00061	RDH5; 11-cis-retinol dehydrogenase [EC:1.1.1.315]
ENSCHIG00000007853	1.42007	-3.01457	0.606652	-4.96919	6.72328e-07	2.80842e-06	K11067	NAGS; N-acetylglutamate synthase [EC:2.3.1.1]
ENSCHIG00000019660	1.42004	3.59472	0.830259	4.32964	1.49355e-05	5.23431e-05	K01542	ATP4A; H+/K+-exchanging ATPase subunit alpha [EC:7.2.2.19]
ENSCHIG00000025287	1.38823	-2.51321	0.873731	-2.87641	0.00402221	0.00926289	K01464	DPYS, dht, hydA; dihydropyrimidinase [EC:3.5.2.2]
ENSCHIG00000025617	1.35465	2.22524	0.697788	3.189	0.00142767	0.00358408	K07408	CYP1A1; cytochrome P450 family 1 subfamily A polypeptide 1 [EC:1.14.14.1]
ENSCHIG00000024430	1.29822	2.13444	0.682017	3.1296	0.00175043	0.00432678	K01583	E4.1.1.19; arginine decarboxylase [EC:4.1.1.19]
ENSCHIG00000022462	1.25689	2.34852	0.682267	3.44223	0.00057694	0.00156139	K11154	RDH16; retinol dehydrogenase 16 [EC:1.1.1.-]
ENSCHIG00000025977	1.18885	-2.04048	0.629841	-3.23968	0.00119664	0.00304943	#N/A
ENSCHIG00000001690	1.16795	-3.82216	0.752107	-5.08193	3.73614e-07	1.61931e-06	K01672	CA; carbonic anhydrase [EC:4.2.1.1]
ENSCHIG00000021185	1.07254	-3.68471	0.848352	-4.34337	1.40314e-05	4.93299e-05	K01194	TREH, treA, treF; alpha,alpha-trehalase [EC:3.2.1.28]
ENSCHIG00000023768	1.04203	-2.23959	0.66421	-3.37181	0.000746771	0.00197685	K00718	FUT1_2; galactoside 2-L-fucosyltransferase 1/2 [EC:2.4.1.69]
ENSCHIG00000024666	0.962899	3.01796	0.892636	3.38095	0.000722351	0.00191828	K12357	NEU2_3_4; sialidase-2/3/4 [EC:3.2.1.18]
ENSCHIG00000018038	0.934393	-2.50859	0.69529	-3.60798	0.000308594	0.000876298	#N/A
ENSCHIG00000012760	0.845456	-3.35718	0.772328	-4.34683	1.38121e-05	4.86245e-05	K00273	DAO, aao; D-amino-acid oxidase [EC:1.4.3.3]
ENSCHIG00000017465	0.809843	-3.29443	0.842552	-3.91006	9.22719e-05	0.000285069	K14457	MOGAT2, MGAT2; 2-acylglycerol O-acyltransferase 2 [EC:2.3.1.22]
ENSCHIG00000022496	0.779995	-3.21461	1.14939	-2.79679	0.00516127	0.0116094	K00830	AGXT; alanine-glyoxylate transaminase / serine-glyoxylate transaminase / serine-pyruvate transaminase [EC:2.6.1.44 2.6.1.45 2.6.1.51]
ENSCHIG00000011377	0.773129	-3.21014	0.765242	-4.19493	2.72951e-05	9.18646e-05	K01047	PLA2G, SPLA2; secretory phospholipase A2 [EC:3.1.1.4]
ENSCHIG00000021128	0.772595	2.96313	0.701185	4.2259	2.37991e-05	8.09295e-05	K12665	CYP26C; cytochrome P450 family 26 subfamily C
ENSCHIG00000025203	0.767672	-3.2029	0.694366	-4.61269	3.97488e-06	1.51294e-05	K00463	IDO, INDO; indoleamine 2,3-dioxygenase [EC:1.13.11.52]
ENSCHIG00000010045	0.754167	-2.94471	0.720042	-4.08964	4.3205e-05	0.000140983	K00108	betA, CHDH; choline dehydrogenase [EC:1.1.99.1]
ENSCHIG00000013258	0.707496	2.83501	0.820889	3.45358	0.00055319	0.00150149	K04119	AKR1C3; aldo-keto reductase family 1 member C3 [EC:1.1.1.51 1.1.1.188 1.1.1.213 1.1.1.357]
ENSCHIG00000017668	0.699813	-2.81974	0.672391	-4.1936	2.74559e-05	9.22945e-05	K00939	adk, AK; adenylate kinase [EC:2.7.4.3]
ENSCHIG00000013282	0.68676	2.50706	1.0401	2.41041	0.0159347	0.0319822	#N/A
ENSCHIG00000014654	0.648451	-2.94817	0.839767	-3.5107	0.000446921	0.0012347	K01896	ACSM; medium-chain acyl-CoA synthetase [EC:6.2.1.2]
ENSCHIG00000015633	0.554647	2.49838	0.774294	3.22666	0.00125244	0.00318144	K18966	GADL1, CSADC, ADC; sulfinoalanine decarboxylase / aspartate 1-decarboxylase [EC:4.1.1.29 4.1.1.11]
ENSCHIG00000001342	0.552706	2.49757	0.744524	3.35459	0.000794834	0.00209314	#N/A
ENSCHIG00000010531	0.530932	-2.11961	0.784428	-2.70212	0.00688996	0.015062	K00513	CYP21A; steroid 21-monooxygenase [EC:1.14.14.16]
ENSCHIG00000012276	0.501076	2.33017	0.934281	2.49408	0.0126286	0.0260022	K04119	AKR1C3; aldo-keto reductase family 1 member C3 [EC:1.1.1.51 1.1.1.188 1.1.1.213 1.1.1.357]
ENSCHIG00000024591	0.446108	2.19273	0.853319	2.56965	0.01018	0.0214155	K01047	PLA2G, SPLA2; secretory phospholipase A2 [EC:3.1.1.4]
ENSCHIG00000022168	0.431333	-2.3763	0.845871	-2.8093	0.00496499	0.0112177	K00502	TPH1_2; tryptophan 5-monooxygenase [EC:1.14.16.4]
ENSCHIG00000018390	0.368903	-2.14202	0.869159	-2.46448	0.0137214	0.0279835	K00815	TAT; tyrosine aminotransferase [EC:2.6.1.5]
PS: 1. FC=Rumen/Cecum

## Sheet: KEGG-enriched
KEGG_A_class	KEGG_B_class	Pathway	out (959)	All (8865)	Rich factor	Pvalue	Qvalue	Pathway ID	Genes	K_IDs
Metabolism	Biosynthesis of other secondary metabolites	Monobactam biosynthesis	2	2	1	0.0116916	0.0712882	ko00261	ENSCHIG00000007800;ENSCHIG00000013444	K13811+K13811
Organismal Systems	Environmental adaptation	Circadian rhythm - fly	1	1	1	0.108178	0.329452	ko04711	ENSCHIG00000012814	K09057
Metabolism	Energy metabolism	Nitrogen metabolism	9	17	0.529412	2.12337e-05	0.00047231	ko00910	ENSCHIG00000001690;ENSCHIG00000004709;ENSCHIG00000012435;ENSCHIG00000016188;ENSCHIG00000019407;ENSCHIG00000020529;ENSCHIG00000021493;ENSCHIG00000024121;ENSCHIG00000026507	K01672+K01672+K01672+K18245+K01672+K01672+K01672+K01672+K18246
Human Diseases	Endocrine and metabolic disease	Maturity onset diabetes of the young	12	26	0.461538	5.4728e-06	0.000250754	ko04950	ENSCHIG00000001150;ENSCHIG00000006078;ENSCHIG00000008225;ENSCHIG00000011232;ENSCHIG00000012775;ENSCHIG00000013879;ENSCHIG00000014024;ENSCHIG00000016007;ENSCHIG00000017334;ENSCHIG00000018046;ENSCHIG00000020271;ENSCHIG00000021570	K08037+K12406+K08040+K08038+K08027+K08035+K08025+K08034+K07292+K08036+K08028+K19521
Metabolism	Lipid metabolism	alpha-Linolenic acid metabolism	14	31	0.451613	1.23683e-06	8.28677e-05	ko00592	ENSCHIG00000009050;ENSCHIG00000010082;ENSCHIG00000010431;ENSCHIG00000011083;ENSCHIG00000011377;ENSCHIG00000015460;ENSCHIG00000016166;ENSCHIG00000016550;ENSCHIG00000019198;ENSCHIG00000020720;ENSCHIG00000022339;ENSCHIG00000024591;ENSCHIG00000026459;ENSCHIG00000026712	K16342+K01047+K01047+K16817+K01047+K10226+K16817+K01047+K16342+K01047+K01047+K01047+K16342+K16342
Metabolism	Metabolism of other amino acids	D-Amino acid metabolism	2	5	0.4	0.093652	0.293629	ko00470	ENSCHIG00000001947;ENSCHIG00000012760	K00272+K00273
Metabolism	Biosynthesis of other secondary metabolites	Neomycin, kanamycin and gentamicin biosynthesis	2	5	0.4	0.093652	0.293629	ko00524	ENSCHIG00000010678;ENSCHIG00000012393	K00844+K00844
Metabolism	Metabolism of cofactors and vitamins	Vitamin B6 metabolism	3	8	0.375	0.0466061	0.190177	ko00750	ENSCHIG00000013439;ENSCHIG00000013677;ENSCHIG00000023475	K00157+K00157+K00831
Human Diseases	Immune disease	Primary immunodeficiency	15	44	0.340909	3.24739e-05	0.000572566	ko05340	ENSCHIG00000009275;ENSCHIG00000010165;ENSCHIG00000011805;ENSCHIG00000012409;ENSCHIG00000012445;ENSCHIG00000013577;ENSCHIG00000013630;ENSCHIG00000014983;ENSCHIG00000018411;ENSCHIG00000020344;ENSCHIG00000020828;ENSCHIG00000022824;ENSCHIG00000024628;ENSCHIG00000026203;ENSCHIG00000026907	K06554+K06856+K06554+K10989+K06856+K06856+K06506+K06856+K06554+K06459+K05072+K06856+K06856+K06554+K06458
Metabolism	Carbohydrate metabolism	Pyruvate metabolism	18	54	0.333333	7.68651e-06	0.000257498	ko00620	ENSCHIG00000001144;ENSCHIG00000003073;ENSCHIG00000004184;ENSCHIG00000006078;ENSCHIG00000010543;ENSCHIG00000011773;ENSCHIG00000012239;ENSCHIG00000015989;ENSCHIG00000018327;ENSCHIG00000018372;ENSCHIG00000020284;ENSCHIG00000021744;ENSCHIG00000022161;ENSCHIG00000022836;ENSCHIG00000023954;ENSCHIG00000024279;ENSCHIG00000024702;ENSCHIG00000025317	K00027+K00016+K01596+K12406+K00016+K00016+K13980+K13951+K01759+K00016+K13952+K01895+K01958+K00029+K01895+K13952+K01596+K13980
Metabolism	Lipid metabolism	Linoleic acid metabolism	16	48	0.333333	2.45308e-05	0.000479949	ko00591	ENSCHIG00000009050;ENSCHIG00000009100;ENSCHIG00000010082;ENSCHIG00000010431;ENSCHIG00000011083;ENSCHIG00000011377;ENSCHIG00000016166;ENSCHIG00000016550;ENSCHIG00000019198;ENSCHIG00000019693;ENSCHIG00000020720;ENSCHIG00000022339;ENSCHIG00000022550;ENSCHIG00000024591;ENSCHIG00000026459;ENSCHIG00000026712	K16342+K07424+K01047+K01047+K16817+K01047+K16817+K01047+K16342+K07413+K01047+K01047+K07413+K01047+K16342+K16342
Metabolism	Metabolism of other amino acids	Taurine and hypotaurine metabolism	6	18	0.333333	0.00932312	0.0637397	ko00430	ENSCHIG00000011935;ENSCHIG00000014242;ENSCHIG00000015633;ENSCHIG00000021041;ENSCHIG00000023150;ENSCHIG00000024836	K00681+K00485+K18966+K00456+K00681+K00659
Organismal Systems	Development and regeneration	Dorso-ventral axis formation	2	6	0.333333	0.130662	0.380623	ko04320	ENSCHIG00000024941;ENSCHIG00000026522	K02156+K02184
Metabolism	Lipid metabolism	Arachidonic acid metabolism	32	100	0.32	7.53243e-09	8.7024e-07	ko00590	ENSCHIG00000004827;ENSCHIG00000009050;ENSCHIG00000010082;ENSCHIG00000010431;ENSCHIG00000011083;ENSCHIG00000011337;ENSCHIG00000011377;ENSCHIG00000011667;ENSCHIG00000011701;ENSCHIG00000012276;ENSCHIG00000013258;ENSCHIG00000015228;ENSCHIG00000015607;ENSCHIG00000016166;ENSCHIG00000016550;ENSCHIG00000016878;ENSCHIG00000017366;ENSCHIG00000018610;ENSCHIG00000019198;ENSCHIG00000019693;ENSCHIG00000020720;…	K00079+K16342+K01047+K01047+K16817+K04119+K01047+K00079+K04119+K04119+K04119+K04119+K04119+K16817+K01047+K04119+K00432+K08022+K16342+K07413+K01047+K04119+K00084+K01047+K07413+K08021+K01047+K15729+K04119+K16342+K16342+K00807
Metabolism	Metabolism of cofactors and vitamins	Nicotinate and nicotinamide metabolism	12	38	0.315789	0.000447985	0.00682158	ko00760	ENSCHIG00000000508;ENSCHIG00000003874;ENSCHIG00000007275;ENSCHIG00000010402;ENSCHIG00000010651;ENSCHIG00000011975;ENSCHIG00000013439;ENSCHIG00000013677;ENSCHIG00000020433;ENSCHIG00000020454;ENSCHIG00000024664;ENSCHIG00000025871	K01513+K01242+K01950+K03783+K19970+K03783+K00157+K00157+K18152+K00767+K01513+K11416
Metabolism	Metabolism of cofactors and vitamins	Thiamine metabolism	6	19	0.315789	0.0124036	0.0728986	ko00730	ENSCHIG00000007647;ENSCHIG00000011217;ENSCHIG00000012120;ENSCHIG00000017668;ENSCHIG00000023918;ENSCHIG00000025470	K00939+K00939+K01077+K00939+K00939+K00939
Metabolism	Glycan biosynthesis and metabolism	Glycosphingolipid biosynthesis - ganglio series	5	16	0.3125	0.0231536	0.117522	ko00604	ENSCHIG00000000945;ENSCHIG00000012912;ENSCHIG00000021591;ENSCHIG00000021799;ENSCHIG00000022129	K03376+K03374+K03370+K00780+K03371
Organismal Systems	Endocrine system	Ovarian steroidogenesis	21	69	0.304348	7.02271e-06	0.000257498	ko04913	ENSCHIG00000009050;ENSCHIG00000011337;ENSCHIG00000011701;ENSCHIG00000012276;ENSCHIG00000012382;ENSCHIG00000013258;ENSCHIG00000015228;ENSCHIG00000015607;ENSCHIG00000016878;ENSCHIG00000018863;ENSCHIG00000019198;ENSCHIG00000021527;ENSCHIG00000022874;ENSCHIG00000023502;ENSCHIG00000024391;ENSCHIG00000024549;ENSCHIG00000024608;ENSCHIG00000025617;ENSCHIG00000026316;ENSCHIG00000026459;ENSCHIG00000026712	K16342+K04119+K04119+K04119+K07410+K04119+K04119+K04119+K04119+K05459+K16342+K04119+K08045+K08042+K04345+K08041+K00044+K07408+K04119+K16342+K16342
Metabolism	Metabolism of cofactors and vitamins	Folate biosynthesis	16	53	0.301887	9.58701e-05	0.00160582	ko00790	ENSCHIG00000001958;ENSCHIG00000004827;ENSCHIG00000009653;ENSCHIG00000011337;ENSCHIG00000011667;ENSCHIG00000011701;ENSCHIG00000012120;ENSCHIG00000012276;ENSCHIG00000013258;ENSCHIG00000015228;ENSCHIG00000015607;ENSCHIG00000016878;ENSCHIG00000021110;ENSCHIG00000021527;ENSCHIG00000022168;ENSCHIG00000026316	K15631+K00079+K20967+K04119+K00079+K04119+K01077+K04119+K04119+K04119+K04119+K04119+K01724+K04119+K00502+K04119
Metabolism	Lipid metabolism	Primary bile acid biosynthesis	5	17	0.294118	0.0299552	0.141338	ko00120	ENSCHIG00000001672;ENSCHIG00000012833;ENSCHIG00000014174;ENSCHIG00000024836;ENSCHIG00000025030	K08748+K07430+K10214+K00659+K00251
Metabolism	Metabolism of cofactors and vitamins	Retinol metabolism	23	79	0.291139	5.98815e-06	0.000250754	ko00830	ENSCHIG00000009100;ENSCHIG00000012239;ENSCHIG00000013439;ENSCHIG00000013677;ENSCHIG00000014412;ENSCHIG00000015989;ENSCHIG00000016774;ENSCHIG00000017958;ENSCHIG00000017969;ENSCHIG00000019693;ENSCHIG00000020284;ENSCHIG00000020729;ENSCHIG00000020938;ENSCHIG00000021128;ENSCHIG00000022245;ENSCHIG00000022462;ENSCHIG00000022529;ENSCHIG00000022550;ENSCHIG00000024279;ENSCHIG00000025317;ENSCHIG00000025617;…	K07424+K13980+K00157+K00157+K00061+K13951+K07437+K07249+K11149+K07413+K13952+K07249+K00699+K12665+K07420+K11154+K17951+K07413+K13952+K13980+K07408+K07249+K11153
Metabolism	Xenobiotics biodegradation and metabolism	Metabolism of xenobiotics by cytochrome P450	20	69	0.289855	2.57883e-05	0.000479949	ko00980	ENSCHIG00000004827;ENSCHIG00000009359;ENSCHIG00000010819;ENSCHIG00000010963;ENSCHIG00000011599;ENSCHIG00000011667;ENSCHIG00000012239;ENSCHIG00000012382;ENSCHIG00000013282;ENSCHIG00000015669;ENSCHIG00000015989;ENSCHIG00000020284;ENSCHIG00000020562;ENSCHIG00000020938;ENSCHIG00000021573;ENSCHIG00000022245;ENSCHIG00000024279;ENSCHIG00000025317;ENSCHIG00000025617;ENSCHIG00000026143	K00079+K00799+K00799+K00799+K15303+K00079+K13980+K07410+K00799+K23790+K13951+K13952+K15303+K00699+K00084+K07420+K13952+K13980+K07408+K00799
Metabolism	Glycan biosynthesis and metabolism	Mucin type O-glycan biosynthesis	10	35	0.285714	0.00306809	0.0263541	ko00512	ENSCHIG00000001864;ENSCHIG00000003265;ENSCHIG00000008602;ENSCHIG00000012912;ENSCHIG00000017266;ENSCHIG00000018016;ENSCHIG00000021799;ENSCHIG00000024307;ENSCHIG00000025267;ENSCHIG00000025600	K00710+K00739+K09663+K03374+K00710+K06616+K00780+K00710+K00710+K03479
Metabolism	Glycan biosynthesis and metabolism	Glycosaminoglycan biosynthesis - keratan sulfate	4	14	0.285714	0.0562918	0.211885	ko00533	ENSCHIG00000007488;ENSCHIG00000008696;ENSCHIG00000010376;ENSCHIG00000021799	K00717+K01022+K09671+K00780
Organismal Systems	Immune system	Complement and coagulation cascades	23	82	0.280488	1.18689e-05	0.000331341	ko04610	ENSCHIG00000000467;ENSCHIG00000005559;ENSCHIG00000006982;ENSCHIG00000010028;ENSCHIG00000010286;ENSCHIG00000011041;ENSCHIG00000011373;ENSCHIG00000014396;ENSCHIG00000014791;ENSCHIG00000014905;ENSCHIG00000015374;ENSCHIG00000015928;ENSCHIG00000017433;ENSCHIG00000018896;ENSCHIG00000019405;ENSCHIG00000020633;ENSCHIG00000020858;ENSCHIG00000021210;ENSCHIG00000021633;ENSCHIG00000021894;ENSCHIG00000022372;…	K23815+K01328+K01333+K23815+K23817+K03994+K03898+K01332+K04000+K04003+K03902+K03910+K19821+K01334+K04001+K03917+K03982+K03995+K03984+K19821+K03983+K04002+K01335
Organismal Systems	Excretory system	Proximal tubule bicarbonate reclamation	7	25	0.28	0.0141957	0.0792593	ko04964	ENSCHIG00000004184;ENSCHIG00000016188;ENSCHIG00000019612;ENSCHIG00000023089;ENSCHIG00000023627;ENSCHIG00000024702;ENSCHIG00000026507	K01596+K18245+K13575+K13576+K01540+K01596+K18246
Human Diseases	Infectious disease: parasitic	Amoebiasis	34	122	0.278689	1.22134e-07	1.02287e-05	ko05146	ENSCHIG00000005295;ENSCHIG00000010165;ENSCHIG00000011086;ENSCHIG00000011350;ENSCHIG00000011600;ENSCHIG00000012186;ENSCHIG00000012445;ENSCHIG00000013024;ENSCHIG00000013116;ENSCHIG00000013577;ENSCHIG00000013633;ENSCHIG00000014791;ENSCHIG00000014983;ENSCHIG00000019728;ENSCHIG00000021178;ENSCHIG00000021181;ENSCHIG00000021319;ENSCHIG00000021699;ENSCHIG00000021903;ENSCHIG00000022069;ENSCHIG00000022769;…	K05637+K06856+K05637+K04391+K06448+K13963+K06856+K04386+K13963+K06856+K06240+K04000+K06856+K00922+K06448+K10955+K06236+K13963+K07898+K01476+K13241+K06856+K05858+K10955+K05505+K04387+K04345+K04519+K08041+K06856+K06448+K06236+K06247+K05505
Environmental Information Processing	Signaling molecules and interaction	Viral protein interaction with cytokine and cytokine receptor	26	94	0.276596	4.31282e-06	0.000240799	ko04061	ENSCHIG00000004359;ENSCHIG00000005122;ENSCHIG00000006150;ENSCHIG00000006667;ENSCHIG00000007770;ENSCHIG00000010803;ENSCHIG00000012394;ENSCHIG00000012602;ENSCHIG00000012968;ENSCHIG00000015403;ENSCHIG00000016224;ENSCHIG00000016688;ENSCHIG00000017060;ENSCHIG00000017407;ENSCHIG00000018646;ENSCHIG00000019145;ENSCHIG00000020041;ENSCHIG00000020624;ENSCHIG00000020838;ENSCHIG00000022311;ENSCHIG00000022701;…	K21093+K04722+K04185+K04722+K04192+K21097+K05055+K05513+K16597+K12671+K05136+K12499+K05507+K12672+K05137+K04182+K04179+K04177+K05050+K04722+K21095+K05505+K05444+K05505+K13072+K05090
Metabolism	Lipid metabolism	Ether lipid metabolism	15	55	0.272727	0.000537032	0.00782199	ko00565	ENSCHIG00000009050;ENSCHIG00000009936;ENSCHIG00000010082;ENSCHIG00000010431;ENSCHIG00000011083;ENSCHIG00000011377;ENSCHIG00000016166;ENSCHIG00000016550;ENSCHIG00000017623;ENSCHIG00000019198;ENSCHIG00000020720;ENSCHIG00000022339;ENSCHIG00000024591;ENSCHIG00000026459;ENSCHIG00000026712	K16342+K00994+K01047+K01047+K16817+K01047+K16817+K01047+K04628+K16342+K01047+K01047+K01047+K16342+K16342
Metabolism	Lipid metabolism	Steroid hormone biosynthesis	23	85	0.270588	2.25581e-05	0.00047231	ko00140	ENSCHIG00000004358;ENSCHIG00000009100;ENSCHIG00000010531;ENSCHIG00000011337;ENSCHIG00000011701;ENSCHIG00000012276;ENSCHIG00000012382;ENSCHIG00000012833;ENSCHIG00000013258;ENSCHIG00000015228;ENSCHIG00000015607;ENSCHIG00000016878;ENSCHIG00000017340;ENSCHIG00000019693;ENSCHIG00000020938;ENSCHIG00000021527;ENSCHIG00000022550;ENSCHIG00000023093;ENSCHIG00000023872;ENSCHIG00000024608;ENSCHIG00000025030;…	K00071+K07424+K00513+K04119+K04119+K04119+K07410+K07430+K04119+K04119+K04119+K04119+K07414+K07413+K00699+K04119+K07413+K01015+K10251+K00044+K00251+K07408+K04119
Human Diseases	Endocrine and metabolic disease	Type II diabetes mellitus	12	45	0.266667	0.00233431	0.0217221	ko04930	ENSCHIG00000005457;ENSCHIG00000006078;ENSCHIG00000008392;ENSCHIG00000009617;ENSCHIG00000010678;ENSCHIG00000011290;ENSCHIG00000012374;ENSCHIG00000012393;ENSCHIG00000014117;ENSCHIG00000019728;ENSCHIG00000021199;ENSCHIG00000025999	K04849+K12406+K04854+K05004+K00844+K04696+K04440+K00844+K05032+K00922+K04852+K18050
Metabolism	Carbohydrate metabolism	Butanoate metabolism	8	30	0.266667	0.0121721	0.0728153	ko00650	ENSCHIG00000000476;ENSCHIG00000013637;ENSCHIG00000014654;ENSCHIG00000023960;ENSCHIG00000024519;ENSCHIG00000025654;ENSCHIG00000026370;ENSCHIG00000026977	K07511+K00022+K01896+K23756+K01896+K01641+K00019+K01640
Metabolism	Lipid metabolism	Fatty acid elongation	8	31	0.258065	0.0148912	0.0804608	ko00062	ENSCHIG00000000476;ENSCHIG00000002685;ENSCHIG00000013637;ENSCHIG00000017259;ENSCHIG00000021133;ENSCHIG00000023872;ENSCHIG00000024466;ENSCHIG00000026063	K07511+K10250+K00022+K10249+K22554+K10251+K07508+K10203
Organismal Systems	Digestive system	Bile secretion	26	101	0.257426	1.77515e-05	0.000457443	ko04976	ENSCHIG00000001672;ENSCHIG00000003216;ENSCHIG00000005530;ENSCHIG00000011408;ENSCHIG00000011447;ENSCHIG00000011928;ENSCHIG00000013067;ENSCHIG00000013314;ENSCHIG00000016126;ENSCHIG00000016188;ENSCHIG00000016664;ENSCHIG00000017192;ENSCHIG00000017768;ENSCHIG00000019542;ENSCHIG00000019612;ENSCHIG00000020565;ENSCHIG00000020938;ENSCHIG00000020981;ENSCHIG00000022874;ENSCHIG00000023502;ENSCHIG00000023627;…	K08748+K05673+K05673+K05673+K05659+K09869+K05673+K05673+K05673+K18245+K05673+K08204+K05031+K14341+K13575+K05673+K00699+K08537+K08045+K08042+K01540+K04345+K08041+K00659+K14360+K14361
Organismal Systems	Digestive system	Pancreatic secretion	27	108	0.25	2.18613e-05	0.00047231	ko04972	ENSCHIG00000003874;ENSCHIG00000007867;ENSCHIG00000010082;ENSCHIG00000010431;ENSCHIG00000011236;ENSCHIG00000011377;ENSCHIG00000011719;ENSCHIG00000011772;ENSCHIG00000016188;ENSCHIG00000016550;ENSCHIG00000017768;ENSCHIG00000018453;ENSCHIG00000019612;ENSCHIG00000020433;ENSCHIG00000020720;ENSCHIG00000020793;ENSCHIG00000021877;ENSCHIG00000022339;ENSCHIG00000022874;ENSCHIG00000023493;ENSCHIG00000023502;…	K01242+K05030+K01047+K01047+K04131+K01047+K05027+K14075+K18245+K01047+K05031+K05853+K13575+K18152+K01047+K04926+K05030+K01047+K08045+K05858+K08042+K01540+K08041+K01047+K04936+K10951+K05028
Metabolism	Metabolism of cofactors and vitamins	Pantothenate and CoA biosynthesis	5	20	0.25	0.0572794	0.213207	ko00770	ENSCHIG00000000508;ENSCHIG00000015633;ENSCHIG00000024247;ENSCHIG00000024664;ENSCHIG00000025287	K01513+K18966+K08069+K01513+K01464
Metabolism	Biosynthesis of other secondary metabolites	Caffeine metabolism	1	4	0.25	0.367477	0.71991	ko00232	ENSCHIG00000017276	K00106
Metabolism	Metabolism of cofactors and vitamins	Lipoic acid metabolism	1	4	0.25	0.367477	0.71991	ko00785	ENSCHIG00000023960	K23756
Human Diseases	Infectious disease: bacterial	Staphylococcus aureus infection	30	122	0.245902	1.10457e-05	0.000331341	ko05150	ENSCHIG00000002045;ENSCHIG00000006982;ENSCHIG00000008951;ENSCHIG00000010165;ENSCHIG00000010632;ENSCHIG00000011041;ENSCHIG00000011368;ENSCHIG00000012445;ENSCHIG00000012495;ENSCHIG00000013100;ENSCHIG00000013291;ENSCHIG00000013577;ENSCHIG00000014396;ENSCHIG00000014749;ENSCHIG00000014983;ENSCHIG00000015373;ENSCHIG00000015383;ENSCHIG00000018811;ENSCHIG00000018896;ENSCHIG00000019803;ENSCHIG00000019924;…	K21100+K01333+K07604+K06856+K07604+K03994+K07604+K06856+K07604+K07604+K07604+K06856+K01332+K07604+K06856+K07604+K07604+K07604+K01334+K07604+K07596+K10785+K21100+K06856+K01335+K07604+K07604+K06496+K06856+K07604
Metabolism	Xenobiotics biodegradation and metabolism	Drug metabolism - cytochrome P450	15	61	0.245902	0.00171426	0.0172225	ko00982	ENSCHIG00000009359;ENSCHIG00000010819;ENSCHIG00000010963;ENSCHIG00000012239;ENSCHIG00000013282;ENSCHIG00000013439;ENSCHIG00000013677;ENSCHIG00000014242;ENSCHIG00000015669;ENSCHIG00000015989;ENSCHIG00000020284;ENSCHIG00000020938;ENSCHIG00000024279;ENSCHIG00000025317;ENSCHIG00000026143	K00799+K00799+K00799+K13980+K00799+K00157+K00157+K00485+K23790+K13951+K13952+K00699+K13952+K13980+K00799
Organismal Systems	Digestive system	Fat digestion and absorption	14	57	0.245614	0.00244406	0.0221287	ko04975	ENSCHIG00000010082;ENSCHIG00000010320;ENSCHIG00000010431;ENSCHIG00000011377;ENSCHIG00000011772;ENSCHIG00000014858;ENSCHIG00000016550;ENSCHIG00000017465;ENSCHIG00000019452;ENSCHIG00000020720;ENSCHIG00000021348;ENSCHIG00000022339;ENSCHIG00000024591;ENSCHIG00000025496	K01047+K11160+K01047+K01047+K14075+K13509+K01047+K14457+K08750+K01047+K08757+K01047+K01047+K14463
Human Diseases	Infectious disease: parasitic	African trypanosomiasis	12	49	0.244898	0.00499566	0.0418387	ko05143	ENSCHIG00000010165;ENSCHIG00000011373;ENSCHIG00000012445;ENSCHIG00000013577;ENSCHIG00000014983;ENSCHIG00000019906;ENSCHIG00000021348;ENSCHIG00000022824;ENSCHIG00000023493;ENSCHIG00000024469;ENSCHIG00000024628;ENSCHIG00000025203	K06856+K03898+K06856+K06856+K06856+K00463+K08757+K06856+K05858+K04519+K06856+K00463
Human Diseases	Drug resistance: antineoplastic	Antifolate resistance	11	45	0.244444	0.0071672	0.0510853	ko01523	ENSCHIG00000003216;ENSCHIG00000005530;ENSCHIG00000011408;ENSCHIG00000013067;ENSCHIG00000013314;ENSCHIG00000016126;ENSCHIG00000016664;ENSCHIG00000020565;ENSCHIG00000024469;ENSCHIG00000025785;ENSCHIG00000026821	K05673+K05673+K05673+K05673+K05673+K05673+K05673+K05673+K04519+K25004+K13649
Metabolism	Glycan biosynthesis and metabolism	Glycosphingolipid biosynthesis - globo and isoglobo series	4	17	0.235294	0.103476	0.318023	ko00603	ENSCHIG00000014679;ENSCHIG00000021799;ENSCHIG00000022129;ENSCHIG00000023768	K00719+K00780+K03371+K00718
Organismal Systems	Digestive system	Gastric acid secretion	19	81	0.234568	0.000825163	0.0104899	ko04971	ENSCHIG00000003162;ENSCHIG00000005207;ENSCHIG00000006692;ENSCHIG00000008409;ENSCHIG00000011236;ENSCHIG00000016188;ENSCHIG00000016823;ENSCHIG00000017768;ENSCHIG00000018219;ENSCHIG00000019214;ENSCHIG00000019660;ENSCHIG00000020793;ENSCHIG00000021436;ENSCHIG00000022874;ENSCHIG00000023493;ENSCHIG00000023502;ENSCHIG00000023627;ENSCHIG00000024391;ENSCHIG00000024549	K13961+K02183+K05237+K04218+K04131+K18245+K04920+K05031+K04195+K05008+K01542+K04926+K04913+K08045+K05858+K08042+K01540+K04345+K08041
Metabolism	Carbohydrate metabolism	Glycolysis / Gluconeogenesis	18	77	0.233766	0.00116895	0.0126322	ko00010	ENSCHIG00000003073;ENSCHIG00000003090;ENSCHIG00000004184;ENSCHIG00000006078;ENSCHIG00000010543;ENSCHIG00000010678;ENSCHIG00000011773;ENSCHIG00000012239;ENSCHIG00000012393;ENSCHIG00000015989;ENSCHIG00000018278;ENSCHIG00000018372;ENSCHIG00000020284;ENSCHIG00000021744;ENSCHIG00000023954;ENSCHIG00000024279;ENSCHIG00000024702;ENSCHIG00000025317	K00016+K01623+K01596+K12406+K00016+K00844+K00016+K13980+K00844+K13951+K01689+K00016+K13952+K01895+K01895+K13952+K01596+K13980
Cellular Processes	Cell growth and death	Apoptosis - fly	3	13	0.230769	0.159075	0.436804	ko04214	ENSCHIG00000001342;ENSCHIG00000006056;ENSCHIG00000017975	K08738+K08738+K03386
Organismal Systems	Immune system	IL-17 signaling pathway	20	87	0.229885	0.000799906	0.0104899	ko04657	ENSCHIG00000002045;ENSCHIG00000008358;ENSCHIG00000012374;ENSCHIG00000012968;ENSCHIG00000013396;ENSCHIG00000014106;ENSCHIG00000015403;ENSCHIG00000016845;ENSCHIG00000016983;ENSCHIG00000018583;ENSCHIG00000021039;ENSCHIG00000021337;ENSCHIG00000021593;ENSCHIG00000022239;ENSCHIG00000022890;ENSCHIG00000023815;ENSCHIG00000024071;ENSCHIG00000024469;ENSCHIG00000026175;ENSCHIG00000026621	K21100+K05494+K04440+K16597+K06855+K05492+K12671+K21128+K01403+K04441+K07994+K21129+K21100+K05489+K04502+K05491+K05505+K04519+K05505+K21127
Organismal Systems	Endocrine system	PPAR signaling pathway	20	88	0.227273	0.00093234	0.0111548	ko03320	ENSCHIG00000001672;ENSCHIG00000004184;ENSCHIG00000008262;ENSCHIG00000011562;ENSCHIG00000013839;ENSCHIG00000014068;ENSCHIG00000014174;ENSCHIG00000015460;ENSCHIG00000016543;ENSCHIG00000019452;ENSCHIG00000021164;ENSCHIG00000021348;ENSCHIG00000022058;ENSCHIG00000022508;ENSCHIG00000022836;ENSCHIG00000023643;ENSCHIG00000024533;ENSCHIG00000024702;ENSCHIG00000025654;ENSCHIG00000026695	K08748+K01596+K08753+K08763+K17284+K08752+K10214+K10226+K08746+K08750+K08761+K08757+K08754+K01897+K00029+K08767+K08749+K01596+K01641+K08526
Environmental Information Processing	Signaling molecules and interaction	Cytokine-cytokine receptor interaction	67	296	0.226351	1.99058e-09	6.66843e-07	ko04060	ENSCHIG00000004359;ENSCHIG00000005122;ENSCHIG00000006150;ENSCHIG00000006667;ENSCHIG00000007770;ENSCHIG00000008358;ENSCHIG00000009367;ENSCHIG00000009696;ENSCHIG00000010136;ENSCHIG00000010429;ENSCHIG00000010751;ENSCHIG00000010803;ENSCHIG00000010864;ENSCHIG00000010918;ENSCHIG00000012394;ENSCHIG00000012562;ENSCHIG00000012602;ENSCHIG00000012832;ENSCHIG00000012968;ENSCHIG00000013024;ENSCHIG00000013118;…	K21093+K04722+K04185+K04722+K04192+K05494+K05057+K05481+K22632+K04663+K22629+K21097+K05081+K05486+K05055+K05074+K05513+K22630+K16597+K04386+K13568+K05492+K05058+K05153+K12671+K05136+K12499+K05507+K05171+K12672+K04723+K13578+K05445+K05149+K05137+K05475+K02583+K04182+K04179+K12967+K04177+K05072+K05050+K05484+K05483+K05155+K05489+K04722+K21095+K05062+K05491+K22627+K05140+K05505+K04387+K22687+K05487+…
Human Diseases	Cancer: specific types	Basal cell carcinoma	14	62	0.225806	0.00554166	0.0444804	ko05217	ENSCHIG00000006042;ENSCHIG00000007513;ENSCHIG00000008551;ENSCHIG00000010919;ENSCHIG00000014378;ENSCHIG00000014632;ENSCHIG00000016159;ENSCHIG00000017723;ENSCHIG00000021782;ENSCHIG00000022296;ENSCHIG00000022853;ENSCHIG00000023410;ENSCHIG00000026211;ENSCHIG00000026310	K06625+K02375+K02842+K01357+K00444+K00572+K00312+K11101+K01384+K00714+K01357+K00445+K02354+K02432
Organismal Systems	Sensory system	Inflammatory mediator regulation of TRP channels	27	120	0.225	0.000154641	0.0024669	ko04750	ENSCHIG00000005207;ENSCHIG00000009050;ENSCHIG00000009730;ENSCHIG00000011373;ENSCHIG00000012374;ENSCHIG00000012691;ENSCHIG00000013024;ENSCHIG00000013785;ENSCHIG00000017471;ENSCHIG00000018583;ENSCHIG00000018863;ENSCHIG00000019198;ENSCHIG00000019693;ENSCHIG00000019728;ENSCHIG00000020752;ENSCHIG00000022550;ENSCHIG00000022874;ENSCHIG00000023493;ENSCHIG00000023502;ENSCHIG00000024391;ENSCHIG00000024469;…	K02183+K16342+K04269+K03898+K04440+K04984+K04386+K04973+K04723+K04441+K05459+K16342+K07413+K00922+K04972+K07413+K08045+K05858+K08042+K04345+K04519+K08041+K18050+K04828+K16342+K16342+K04983
Metabolism	Amino acid metabolism	Tyrosine metabolism	9	40	0.225	0.0244261	0.12213	ko00350	ENSCHIG00000012239;ENSCHIG00000013439;ENSCHIG00000013677;ENSCHIG00000013689;ENSCHIG00000015989;ENSCHIG00000018390;ENSCHIG00000020284;ENSCHIG00000024279;ENSCHIG00000025317	K13980+K00157+K00157+K01593+K13951+K00815+K13952+K13952+K13980
Organismal Systems	Immune system	Intestinal immune network for IgA production	17	76	0.223684	0.00262687	0.0231579	ko04672	ENSCHIG00000006150;ENSCHIG00000010165;ENSCHIG00000011093;ENSCHIG00000012409;ENSCHIG00000012445;ENSCHIG00000012562;ENSCHIG00000012602;ENSCHIG00000012705;ENSCHIG00000013577;ENSCHIG00000013703;ENSCHIG00000014875;ENSCHIG00000014983;ENSCHIG00000019003;ENSCHIG00000021365;ENSCHIG00000022824;ENSCHIG00000024628;ENSCHIG00000026192	K04185+K06856+K06779+K10989+K06856+K05074+K05513+K13073+K06856+K06710+K05153+K06856+K05475+K10785+K06856+K06856+K13072
Organismal Systems	Digestive system	Salivary secretion	22	100	0.22	0.000845451	0.0104899	ko04970	ENSCHIG00000003874;ENSCHIG00000005207;ENSCHIG00000006608;ENSCHIG00000009210;ENSCHIG00000009412;ENSCHIG00000011076;ENSCHIG00000011236;ENSCHIG00000014973;ENSCHIG00000017178;ENSCHIG00000018108;ENSCHIG00000020433;ENSCHIG00000021001;ENSCHIG00000022325;ENSCHIG00000022874;ENSCHIG00000023493;ENSCHIG00000023502;ENSCHIG00000023627;ENSCHIG00000024391;ENSCHIG00000024549;ENSCHIG00000025127;ENSCHIG00000027061;…	K01242+K02183+K13915+K13879+K09867+K13912+K04131+K19477+K13915+K04945+K18152+K04135+K13915+K08045+K05858+K08042+K01540+K04345+K08041+K04936+K10951+K13915
Metabolism	Carbohydrate metabolism	Starch and sucrose metabolism	7	32	0.21875	0.0512397	0.197302	ko00500	ENSCHIG00000000508;ENSCHIG00000010240;ENSCHIG00000010678;ENSCHIG00000012393;ENSCHIG00000015889;ENSCHIG00000021185;ENSCHIG00000024664	K01513+K01203+K00844+K00844+K12047+K01194+K01513
Metabolism	Lipid metabolism	Biosynthesis of unsaturated fatty acids	7	32	0.21875	0.0512397	0.197302	ko01040	ENSCHIG00000002685;ENSCHIG00000015460;ENSCHIG00000017259;ENSCHIG00000022314;ENSCHIG00000023872;ENSCHIG00000024836;ENSCHIG00000026063	K10250+K10226+K10249+K10224+K10251+K00659+K10203
Human Diseases	Cancer: overview	Chemical carcinogenesis - DNA adducts	15	70	0.214286	0.00696361	0.0507133	ko05204	ENSCHIG00000004827;ENSCHIG00000009100;ENSCHIG00000009359;ENSCHIG00000010819;ENSCHIG00000010963;ENSCHIG00000011667;ENSCHIG00000012382;ENSCHIG00000013282;ENSCHIG00000015669;ENSCHIG00000019289;ENSCHIG00000019693;ENSCHIG00000020938;ENSCHIG00000022550;ENSCHIG00000025617;ENSCHIG00000026143	K00079+K07424+K00799+K00799+K00799+K00079+K07410+K00799+K23790+K01014+K07413+K00699+K07413+K07408+K00799
Organismal Systems	Immune system	Toll and Imd signaling pathway	3	14	0.214286	0.187107	0.481129	ko04624	ENSCHIG00000008514;ENSCHIG00000012801;ENSCHIG00000018583	K13411+K13411+K04441
Metabolism	Amino acid metabolism	Tryptophan metabolism	10	47	0.212766	0.026355	0.127955	ko00380	ENSCHIG00000000476;ENSCHIG00000012382;ENSCHIG00000013439;ENSCHIG00000013637;ENSCHIG00000013677;ENSCHIG00000013689;ENSCHIG00000019906;ENSCHIG00000022168;ENSCHIG00000025203;ENSCHIG00000025617	K07511+K07410+K00157+K00022+K00157+K01593+K00463+K00502+K00463+K07408
Organismal Systems	Excretory system	Aldosterone-regulated sodium reabsorption	8	38	0.210526	0.0471184	0.190177	ko04960	ENSCHIG00000001148;ENSCHIG00000004358;ENSCHIG00000009435;ENSCHIG00000010215;ENSCHIG00000018863;ENSCHIG00000019728;ENSCHIG00000021500;ENSCHIG00000023627	K06644+K00071+K04824+K13302+K05459+K00922+K04825+K01540
Metabolism	Xenobiotics biodegradation and metabolism	Drug metabolism - other enzymes	16	77	0.207792	0.00737833	0.0514946	ko00983	ENSCHIG00000005780;ENSCHIG00000009359;ENSCHIG00000009802;ENSCHIG00000010819;ENSCHIG00000010963;ENSCHIG00000013282;ENSCHIG00000014663;ENSCHIG00000015669;ENSCHIG00000017276;ENSCHIG00000018038;ENSCHIG00000020938;ENSCHIG00000025287;ENSCHIG00000025848;ENSCHIG00000026143;ENSCHIG00000026715;ENSCHIG00000027133	K00569+K00799+K00940+K00799+K00799+K00799+K00757+K23790+K00106+K01520+K00699+K01464+K01044+K00799+K01195+K01489
Environmental Information Processing	Membrane transport	ABC transporters	13	63	0.206349	0.01578	0.0839096	ko02010	ENSCHIG00000003216;ENSCHIG00000005530;ENSCHIG00000011408;ENSCHIG00000011447;ENSCHIG00000013067;ENSCHIG00000013314;ENSCHIG00000014117;ENSCHIG00000016126;ENSCHIG00000016664;ENSCHIG00000017768;ENSCHIG00000019371;ENSCHIG00000020565;ENSCHIG00000022604	K05673+K05673+K05673+K05659+K05673+K05673+K05032+K05673+K05673+K05031+K05646+K05673+K05669
Organismal Systems	Immune system	Hematopoietic cell lineage	23	112	0.205357	0.00174795	0.0172225	ko04640	ENSCHIG00000003874;ENSCHIG00000007906;ENSCHIG00000010165;ENSCHIG00000011350;ENSCHIG00000011600;ENSCHIG00000012394;ENSCHIG00000012445;ENSCHIG00000013024;ENSCHIG00000013577;ENSCHIG00000014871;ENSCHIG00000014983;ENSCHIG00000015151;ENSCHIG00000018865;ENSCHIG00000020344;ENSCHIG00000020828;ENSCHIG00000021178;ENSCHIG00000022824;ENSCHIG00000024086;ENSCHIG00000024469;ENSCHIG00000024628;ENSCHIG00000024747;…	K01242+K06457+K06856+K04391+K06448+K05055+K06856+K04386+K06856+K06457+K06856+K06469+K06457+K06459+K05072+K06448+K06856+K04387+K04519+K06856+K06448+K05090+K06458
Organismal Systems	Sensory system	Taste transduction	14	69	0.202899	0.0144655	0.0794416	ko04742	ENSCHIG00000002319;ENSCHIG00000009435;ENSCHIG00000010567;ENSCHIG00000011236;ENSCHIG00000017073;ENSCHIG00000020127;ENSCHIG00000021500;ENSCHIG00000022634;ENSCHIG00000022770;ENSCHIG00000023493;ENSCHIG00000023746;ENSCHIG00000024391;ENSCHIG00000024967;ENSCHIG00000026032	K04980+K04824+K01509+K04131+K04819+K04841+K04825+K04916+K05216+K05858+K05175+K04345+K04615+K04828
Organismal Systems	Immune system	Fc epsilon RI signaling pathway	15	74	0.202703	0.011704	0.0712882	ko04664	ENSCHIG00000009050;ENSCHIG00000010165;ENSCHIG00000011885;ENSCHIG00000012374;ENSCHIG00000012445;ENSCHIG00000013577;ENSCHIG00000014983;ENSCHIG00000018583;ENSCHIG00000019198;ENSCHIG00000019728;ENSCHIG00000022824;ENSCHIG00000024628;ENSCHIG00000024845;ENSCHIG00000026459;ENSCHIG00000026712	K16342+K06856+K08089+K04440+K06856+K06856+K06856+K04441+K16342+K00922+K06856+K06856+K07860+K16342+K16342
Metabolism	Amino acid metabolism	Cysteine and methionine metabolism	11	55	0.2	0.0312474	0.145387	ko00270	ENSCHIG00000000324;ENSCHIG00000003073;ENSCHIG00000009411;ENSCHIG00000010543;ENSCHIG00000011773;ENSCHIG00000018372;ENSCHIG00000018390;ENSCHIG00000021041;ENSCHIG00000023411;ENSCHIG00000023475;ENSCHIG00000025257	K00548+K00016+K00789+K00016+K00016+K00016+K00815+K00456+K01251+K00831+K11205
Metabolism	Lipid metabolism	Fatty acid degradation	10	50	0.2	0.0389718	0.16857	ko00071	ENSCHIG00000000476;ENSCHIG00000012239;ENSCHIG00000013637;ENSCHIG00000015989;ENSCHIG00000016201;ENSCHIG00000020284;ENSCHIG00000022508;ENSCHIG00000024279;ENSCHIG00000024466;ENSCHIG00000025317	K07511+K13980+K00022+K13951+K13239+K13952+K01897+K13952+K07508+K13980
Metabolism	Amino acid metabolism	Arginine biosynthesis	4	20	0.2	0.163522	0.440381	ko00220	ENSCHIG00000007853;ENSCHIG00000017801;ENSCHIG00000022069;ENSCHIG00000022769	K11067+K01940+K01476+K13241
Metabolism	Metabolism of cofactors and vitamins	Riboflavin metabolism	2	10	0.2	0.295686	0.639064	ko00740	ENSCHIG00000000508;ENSCHIG00000024664	K01513+K01513
Organismal Systems	Endocrine system	Estrogen signaling pathway	28	141	0.198582	0.00101633	0.011349	ko04915	ENSCHIG00000005207;ENSCHIG00000008951;ENSCHIG00000010632;ENSCHIG00000011368;ENSCHIG00000011683;ENSCHIG00000012495;ENSCHIG00000013100;ENSCHIG00000013291;ENSCHIG00000013813;ENSCHIG00000014749;ENSCHIG00000015373;ENSCHIG00000015383;ENSCHIG00000016983;ENSCHIG00000018811;ENSCHIG00000019728;ENSCHIG00000019803;ENSCHIG00000020547;ENSCHIG00000022689;ENSCHIG00000022874;ENSCHIG00000023493;ENSCHIG00000023502;…	K02183+K07604+K07604+K07604+K08551+K07604+K07604+K07604+K17449+K07604+K07604+K07604+K01403+K07604+K00922+K07604+K04361+K08523+K08045+K05858+K08042+K07604+K07604+K04345+K08041+K04615+K07604+K09048
Metabolism	Nucleotide metabolism	Pyrimidine metabolism	11	56	0.196429	0.035231	0.159466	ko00240	ENSCHIG00000000508;ENSCHIG00000009802;ENSCHIG00000010651;ENSCHIG00000011914;ENSCHIG00000014663;ENSCHIG00000018038;ENSCHIG00000023900;ENSCHIG00000024664;ENSCHIG00000025287;ENSCHIG00000026804;ENSCHIG00000027133	K01513+K00940+K19970+K01510+K00757+K01520+K01510+K01513+K01464+K01511+K01489
Organismal Systems	Immune system	Natural killer cell mediated cytotoxicity	31	159	0.194969	0.000774593	0.0104899	ko04650	ENSCHIG00000000135;ENSCHIG00000001983;ENSCHIG00000003071;ENSCHIG00000005122;ENSCHIG00000005334;ENSCHIG00000006667;ENSCHIG00000008160;ENSCHIG00000009129;ENSCHIG00000009324;ENSCHIG00000009906;ENSCHIG00000010165;ENSCHIG00000011749;ENSCHIG00000012445;ENSCHIG00000013577;ENSCHIG00000013813;ENSCHIG00000014652;ENSCHIG00000014983;ENSCHIG00000015450;ENSCHIG00000016245;ENSCHIG00000017270;ENSCHIG00000019728;…	K07818+K07987+K04409+K04722+K07986+K04722+K07986+K07987+K06516+K06541+K06856+K06728+K06856+K06856+K17449+K06516+K06856+K06516+K01353+K07980+K00922+K01353+K01353+K01353+K06582+K04722+K06856+K07986+K06856+K07860+K07980
Metabolism	Carbohydrate metabolism	Propanoate metabolism	7	36	0.194444	0.0874942	0.287358	ko00640	ENSCHIG00000000476;ENSCHIG00000003073;ENSCHIG00000010543;ENSCHIG00000011773;ENSCHIG00000018372;ENSCHIG00000021744;ENSCHIG00000023954	K07511+K00016+K00016+K00016+K00016+K01895+K01895
Human Diseases	Cardiovascular disease	Dilated cardiomyopathy	21	109	0.192661	0.00594903	0.0452938	ko05414	ENSCHIG00000005295;ENSCHIG00000008416;ENSCHIG00000010165;ENSCHIG00000011086;ENSCHIG00000012445;ENSCHIG00000013367;ENSCHIG00000013577;ENSCHIG00000014983;ENSCHIG00000018453;ENSCHIG00000018472;ENSCHIG00000018863;ENSCHIG00000019429;ENSCHIG00000020204;ENSCHIG00000020498;ENSCHIG00000022824;ENSCHIG00000022874;ENSCHIG00000023502;ENSCHIG00000024391;ENSCHIG00000024549;ENSCHIG00000024628;ENSCHIG00000025296	K05637+K07610+K06856+K05637+K06856+K04865+K06856+K06856+K05853+K12567+K05459+K06591+K10373+K12044+K06856+K08045+K08042+K04345+K08041+K06856+K06587
Human Diseases	Infectious disease: bacterial	Pathogenic Escherichia coli infection	14	73	0.191781	0.0230891	0.117522	ko05130	ENSCHIG00000001342;ENSCHIG00000006056;ENSCHIG00000006667;ENSCHIG00000010165;ENSCHIG00000011774;ENSCHIG00000012445;ENSCHIG00000013577;ENSCHIG00000014922;ENSCHIG00000014983;ENSCHIG00000018583;ENSCHIG00000019938;ENSCHIG00000022311;ENSCHIG00000022824;ENSCHIG00000024628	K08738+K08738+K04722+K06856+K10356+K06856+K06856+K10356+K06856+K04441+K10357+K04722+K06856+K06856
Metabolism	Lipid metabolism	Sphingolipid metabolism	9	47	0.191489	0.0618551	0.225233	ko00600	ENSCHIG00000000421;ENSCHIG00000008361;ENSCHIG00000017623;ENSCHIG00000017842;ENSCHIG00000019978;ENSCHIG00000021209;ENSCHIG00000024666;ENSCHIG00000025213;ENSCHIG00000025546	K07553+K01441+K04628+K04714+K12352+K04710+K12357+K17108+K24622
Organismal Systems	Digestive system	Carbohydrate digestion and absorption	9	47	0.191489	0.0618551	0.225233	ko04973	ENSCHIG00000010240;ENSCHIG00000010515;ENSCHIG00000010678;ENSCHIG00000012393;ENSCHIG00000015889;ENSCHIG00000018753;ENSCHIG00000019728;ENSCHIG00000023493;ENSCHIG00000023627	K01203+K08143+K00844+K00844+K12047+K08143+K00922+K05858+K01540
Organismal Systems	Endocrine system	Insulin secretion	17	89	0.191011	0.0136536	0.0775244	ko04911	ENSCHIG00000009617;ENSCHIG00000011236;ENSCHIG00000012611;ENSCHIG00000014117;ENSCHIG00000014377;ENSCHIG00000018108;ENSCHIG00000020293;ENSCHIG00000021277;ENSCHIG00000022787;ENSCHIG00000022874;ENSCHIG00000023493;ENSCHIG00000023502;ENSCHIG00000023627;ENSCHIG00000024391;ENSCHIG00000024549;ENSCHIG00000025127;ENSCHIG00000025478	K05004+K04131+K16882+K05032+K04942+K04945+K18211+K05259+K04581+K08045+K05858+K08042+K01540+K04345+K08041+K04936+K09048
Organismal Systems	Endocrine system	Melanogenesis	19	100	0.19	0.010017	0.0671142	ko04916	ENSCHIG00000005207;ENSCHIG00000007513;ENSCHIG00000008551;ENSCHIG00000010919;ENSCHIG00000014378;ENSCHIG00000014632;ENSCHIG00000016159;ENSCHIG00000021782;ENSCHIG00000022296;ENSCHIG00000022853;ENSCHIG00000022874;ENSCHIG00000023410;ENSCHIG00000023493;ENSCHIG00000023502;ENSCHIG00000024391;ENSCHIG00000024549;ENSCHIG00000025478;ENSCHIG00000026211;ENSCHIG00000026310	K02183+K02375+K02842+K01357+K00444+K00572+K00312+K01384+K00714+K01357+K08045+K00445+K05858+K08042+K04345+K08041+K09048+K02354+K02432
Metabolism	Nucleotide metabolism	Purine metabolism	28	148	0.189189	0.00217812	0.0208478	ko00230	ENSCHIG00000000508;ENSCHIG00000007647;ENSCHIG00000007800;ENSCHIG00000009677;ENSCHIG00000009802;ENSCHIG00000009873;ENSCHIG00000010402;ENSCHIG00000010567;ENSCHIG00000010651;ENSCHIG00000011217;ENSCHIG00000011914;ENSCHIG00000011975;ENSCHIG00000013332;ENSCHIG00000013444;ENSCHIG00000015696;ENSCHIG00000017276;ENSCHIG00000017496;ENSCHIG00000017668;ENSCHIG00000017922;ENSCHIG00000022874;ENSCHIG00000023502;…	K01513+K00939+K13811+K13296+K00940+K12320+K03783+K01509+K19970+K00939+K01510+K03783+K01490+K13811+K13485+K00106+K13761+K00939+K08718+K08045+K08042+K01510+K00939+K08041+K01513+K00939+K19021+K01511
Human Diseases	Infectious disease: bacterial	Epithelial cell signaling in Helicobacter pylori infection	3	16	0.1875	0.246302	0.572993	ko05120	ENSCHIG00000018583;ENSCHIG00000020838;ENSCHIG00000026175	K04441+K05050+K05505
Organismal Systems	Endocrine system	Renin secretion	14	75	0.186667	0.0286219	0.136976	ko04924	ENSCHIG00000005207;ENSCHIG00000007867;ENSCHIG00000009677;ENSCHIG00000011470;ENSCHIG00000011719;ENSCHIG00000014973;ENSCHIG00000017167;ENSCHIG00000021877;ENSCHIG00000022874;ENSCHIG00000023493;ENSCHIG00000024391;ENSCHIG00000025127;ENSCHIG00000025977;ENSCHIG00000027130	K02183+K05030+K13296+K04166+K05027+K19477+K05227+K05030+K08045+K05858+K04345+K04936+K19021+K05028
Metabolism	Lipid metabolism	Glycerophospholipid metabolism	20	108	0.185185	0.0111037	0.0712882	ko00564	ENSCHIG00000009050;ENSCHIG00000009573;ENSCHIG00000009936;ENSCHIG00000010082;ENSCHIG00000010431;ENSCHIG00000011083;ENSCHIG00000011377;ENSCHIG00000012809;ENSCHIG00000013810;ENSCHIG00000014858;ENSCHIG00000015594;ENSCHIG00000016166;ENSCHIG00000016550;ENSCHIG00000019198;ENSCHIG00000020720;ENSCHIG00000022339;ENSCHIG00000024591;ENSCHIG00000025469;ENSCHIG00000026459;ENSCHIG00000026712	K16342+K13517+K00994+K01047+K01047+K16817+K01047+K13618+K18693+K13509+K00623+K16817+K01047+K16342+K01047+K01047+K01047+K13506+K16342+K16342
Metabolism	Energy metabolism	Sulfur metabolism	2	11	0.181818	0.337474	0.694349	ko00920	ENSCHIG00000007800;ENSCHIG00000013444	K13811+K13811
Cellular Processes	Cellular community - eukaryotes	Signaling pathways regulating pluripotency of stem cells	25	138	0.181159	0.00653845	0.0486751	ko04550	ENSCHIG00000007513;ENSCHIG00000008551;ENSCHIG00000009075;ENSCHIG00000010919;ENSCHIG00000011126;ENSCHIG00000013118;ENSCHIG00000014349;ENSCHIG00000014378;ENSCHIG00000014632;ENSCHIG00000016159;ENSCHIG00000017761;ENSCHIG00000017955;ENSCHIG00000018583;ENSCHIG00000018863;ENSCHIG00000019728;ENSCHIG00000021782;ENSCHIG00000022296;ENSCHIG00000022513;ENSCHIG00000022853;ENSCHIG00000023410;ENSCHIG00000023444;…	K02375+K02842+K18489+K01357+K16796+K13568+K05058+K00444+K00572+K00312+K13578+K09326+K04441+K05459+K00922+K01384+K00714+K09370+K01357+K00445+K05095+K22687+K02354+K02432+K15613
Organismal Systems	Endocrine system	Thyroid hormone synthesis	14	78	0.179487	0.0386603	0.16857	ko04918	ENSCHIG00000008514;ENSCHIG00000010151;ENSCHIG00000012801;ENSCHIG00000017366;ENSCHIG00000018952;ENSCHIG00000022874;ENSCHIG00000023493;ENSCHIG00000023502;ENSCHIG00000023627;ENSCHIG00000024391;ENSCHIG00000024549;ENSCHIG00000025478;ENSCHIG00000025998;ENSCHIG00000026899	K13411+K17232+K13411+K00432+K16141+K08045+K05858+K08042+K01540+K04345+K08041+K09048+K14702+K17231
Environmental Information Processing	Signal transduction	MAPK signaling pathway - fly	7	39	0.179487	0.12219	0.36877	ko04013	ENSCHIG00000008514;ENSCHIG00000012801;ENSCHIG00000016323;ENSCHIG00000018583;ENSCHIG00000018660;ENSCHIG00000019014;ENSCHIG00000021581	K13411+K13411+K05088+K04441+K04497+K04497+K20211
Human Diseases	Drug resistance: antineoplastic	Endocrine resistance	17	95	0.178947	0.0250122	0.123222	ko01522	ENSCHIG00000006042;ENSCHIG00000007326;ENSCHIG00000011683;ENSCHIG00000012374;ENSCHIG00000013813;ENSCHIG00000015794;ENSCHIG00000016952;ENSCHIG00000016983;ENSCHIG00000018583;ENSCHIG00000018863;ENSCHIG00000019728;ENSCHIG00000020547;ENSCHIG00000022689;ENSCHIG00000022874;ENSCHIG00000023502;ENSCHIG00000024391;ENSCHIG00000024549	K06625+K09389+K08551+K04440+K17449+K21635+K20995+K01403+K04441+K05459+K00922+K04361+K08523+K08045+K08042+K04345+K08041
Human Diseases	Cancer: specific types	Gastric cancer	27	151	0.178808	0.00579204	0.045124	ko05226	ENSCHIG00000006042;ENSCHIG00000007326;ENSCHIG00000007513;ENSCHIG00000008229;ENSCHIG00000008551;ENSCHIG00000010919;ENSCHIG00000011455;ENSCHIG00000012379;ENSCHIG00000013813;ENSCHIG00000014378;ENSCHIG00000014632;ENSCHIG00000015183;ENSCHIG00000016159;ENSCHIG00000019728;ENSCHIG00000020547;ENSCHIG00000020738;ENSCHIG00000021181;ENSCHIG00000021782;ENSCHIG00000022296;ENSCHIG00000022853;ENSCHIG00000023410;…	K06625+K09389+K02375+K11126+K02842+K01357+K04358+K06811+K17449+K00444+K00572+K22244+K00312+K00922+K04361+K04358+K10955+K01384+K00714+K01357+K00445+K10955+K22234+K02354+K02432+K10056+K08526
Environmental Information Processing	Signal transduction	Wnt signaling pathway	29	165	0.175758	0.00557665	0.0444804	ko04310	ENSCHIG00000000665;ENSCHIG00000007513;ENSCHIG00000008551;ENSCHIG00000008577;ENSCHIG00000010456;ENSCHIG00000010919;ENSCHIG00000012374;ENSCHIG00000013482;ENSCHIG00000014291;ENSCHIG00000014378;ENSCHIG00000014632;ENSCHIG00000016159;ENSCHIG00000018190;ENSCHIG00000018660;ENSCHIG00000019014;ENSCHIG00000021563;ENSCHIG00000021782;ENSCHIG00000022144;ENSCHIG00000022296;ENSCHIG00000022853;ENSCHIG00000022890;…	K04512+K02375+K02842+K02185+K03344+K01357+K04440+K23491+K02166+K00444+K00572+K00312+K04308+K04497+K04497+K25481+K01384+K03213+K00714+K01357+K04502+K00445+K05858+K04345+K08399+K07860+K02354+K02432+K19614
Environmental Information Processing	Signal transduction	cAMP signaling pathway	42	239	0.175732	0.000971758	0.0112255	ko04024	ENSCHIG00000003071;ENSCHIG00000003216;ENSCHIG00000005207;ENSCHIG00000005530;ENSCHIG00000006692;ENSCHIG00000008409;ENSCHIG00000009677;ENSCHIG00000010746;ENSCHIG00000011136;ENSCHIG00000011408;ENSCHIG00000012374;ENSCHIG00000012488;ENSCHIG00000013067;ENSCHIG00000013314;ENSCHIG00000013825;ENSCHIG00000015334;ENSCHIG00000016126;ENSCHIG00000016664;ENSCHIG00000017167;ENSCHIG00000017768;ENSCHIG00000017920;…	K04409+K05673+K02183+K05673+K05237+K04218+K13296+K08402+K08401+K05673+K04440+K04129+K05673+K05673+K04948+K05264+K05673+K05673+K05227+K05031+K05731+K05853+K00922+K04578+K12044+K05673+K05259+K18435+K04955+K04160+K04581+K08045+K08042+K01540+K04345+K08041+K07860+K04615+K09048+K19021+K05214+K15494
Human Diseases	Infectious disease: bacterial	Pertussis	13	74	0.175676	0.0524741	0.199759	ko05133	ENSCHIG00000005207;ENSCHIG00000011041;ENSCHIG00000011350;ENSCHIG00000011503;ENSCHIG00000012374;ENSCHIG00000014396;ENSCHIG00000014905;ENSCHIG00000018583;ENSCHIG00000019284;ENSCHIG00000019405;ENSCHIG00000022712;ENSCHIG00000022769;ENSCHIG00000024469	K02183+K03994+K04391+K04397+K04440+K01332+K04003+K04441+K08727+K04001+K04002+K13241+K04519
Metabolism	Metabolism of other amino acids	Glutathione metabolism	11	63	0.174603	0.073328	0.24813	ko00480	ENSCHIG00000009359;ENSCHIG00000010819;ENSCHIG00000010963;ENSCHIG00000011935;ENSCHIG00000013282;ENSCHIG00000015669;ENSCHIG00000016311;ENSCHIG00000017366;ENSCHIG00000023150;ENSCHIG00000025257;ENSCHIG00000026143	K00799+K00799+K00799+K00681+K00799+K23790+K11188+K00432+K00681+K11205+K00799
Human Diseases	Cancer: overview	Central carbon metabolism in cancer	12	69	0.173913	0.0648717	0.229593	ko05230	ENSCHIG00000003073;ENSCHIG00000005194;ENSCHIG00000010543;ENSCHIG00000010670;ENSCHIG00000010678;ENSCHIG00000011773;ENSCHIG00000012393;ENSCHIG00000018372;ENSCHIG00000019728;ENSCHIG00000020547;ENSCHIG00000021480;ENSCHIG00000025871	K00016+K04363+K00016+K05101+K00844+K00016+K00844+K00016+K00922+K04361+K05126+K11416
Organismal Systems	Endocrine system	Regulation of lipolysis in adipocytes	10	58	0.172414	0.0911093	0.293629	ko04923	ENSCHIG00000008262;ENSCHIG00000009677;ENSCHIG00000011083;ENSCHIG00000014973;ENSCHIG00000016166;ENSCHIG00000019728;ENSCHIG00000022874;ENSCHIG00000023502;ENSCHIG00000024391;ENSCHIG00000024549	K08753+K13296+K16817+K19477+K16817+K00922+K08045+K08042+K04345+K08041
Metabolism	Glycan biosynthesis and metabolism	Glycosphingolipid biosynthesis - lacto and neolacto series	5	29	0.172414	0.19889	0.500964	ko00601	ENSCHIG00000005257;ENSCHIG00000012632;ENSCHIG00000014679;ENSCHIG00000022129;ENSCHIG00000023768	K07820+K03494+K00719+K03371+K00718
Organismal Systems	Excretory system	Collecting duct acid secretion	5	29	0.172414	0.19889	0.500964	ko04966	ENSCHIG00000011623;ENSCHIG00000014286;ENSCHIG00000016188;ENSCHIG00000017272;ENSCHIG00000019660	K02153+K02147+K18245+K02148+K01542
Environmental Information Processing	Signal transduction	Calcium signaling pathway	45	264	0.170455	0.0012524	0.0131111	ko04020	ENSCHIG00000000241;ENSCHIG00000003874;ENSCHIG00000005194;ENSCHIG00000005207;ENSCHIG00000005457;ENSCHIG00000006724;ENSCHIG00000008392;ENSCHIG00000008729;ENSCHIG00000010165;ENSCHIG00000010670;ENSCHIG00000011236;ENSCHIG00000011455;ENSCHIG00000011470;ENSCHIG00000012389;ENSCHIG00000012445;ENSCHIG00000012488;ENSCHIG00000013577;ENSCHIG00000014887;ENSCHIG00000014983;ENSCHIG00000015813;ENSCHIG00000018219;…	K09565+K01242+K04363+K02183+K04849+K04297+K04854+K04993+K06856+K05101+K04131+K04358+K04166+K00911+K06856+K04129+K06856+K23441+K06856+K04604+K04195+K04163+K05853+K04161+K04224+K04361+K04358+K04135+K04852+K10785+K05126+K05220+K04160+K13241+K05216+K06856+K04360+K05452+K05095+K05858+K08042+K04345+K08041+K06856+K05857
Human Diseases	Immune disease	Graft-versus-host disease	15	88	0.170455	0.049367	0.19688	ko05332	ENSCHIG00000000135;ENSCHIG00000009324;ENSCHIG00000009906;ENSCHIG00000010779;ENSCHIG00000014652;ENSCHIG00000015450;ENSCHIG00000016245;ENSCHIG00000017270;ENSCHIG00000020332;ENSCHIG00000020617;ENSCHIG00000021365;ENSCHIG00000021899;ENSCHIG00000022005;ENSCHIG00000024469;ENSCHIG00000025463	K07818+K06516+K06541+K06751+K06516+K06516+K01353+K07980+K01353+K01353+K10785+K06751+K01353+K04519+K07980
Human Diseases	Endocrine and metabolic disease	Cushing syndrome	27	159	0.169811	0.0115052	0.0712882	ko04934	ENSCHIG00000001648;ENSCHIG00000006042;ENSCHIG00000007326;ENSCHIG00000007513;ENSCHIG00000008392;ENSCHIG00000008551;ENSCHIG00000010531;ENSCHIG00000010919;ENSCHIG00000011470;ENSCHIG00000014378;ENSCHIG00000014632;ENSCHIG00000016159;ENSCHIG00000019825;ENSCHIG00000020547;ENSCHIG00000021436;ENSCHIG00000021782;ENSCHIG00000022296;ENSCHIG00000022853;ENSCHIG00000022874;ENSCHIG00000023410;ENSCHIG00000023493;…	K04877+K06625+K09389+K02375+K04854+K02842+K00513+K01357+K04166+K00444+K00572+K00312+K04578+K04361+K04913+K01384+K00714+K01357+K08045+K00445+K05858+K08042+K04345+K08041+K09048+K02354+K02432
Organismal Systems	Endocrine system	Parathyroid hormone synthesis, secretion and action	19	113	0.168142	0.0335251	0.153848	ko04928	ENSCHIG00000006042;ENSCHIG00000007526;ENSCHIG00000009239;ENSCHIG00000011010;ENSCHIG00000012217;ENSCHIG00000013144;ENSCHIG00000013887;ENSCHIG00000015739;ENSCHIG00000020547;ENSCHIG00000021039;ENSCHIG00000022689;ENSCHIG00000022874;ENSCHIG00000023493;ENSCHIG00000023502;ENSCHIG00000023586;ENSCHIG00000024391;ENSCHIG00000024549;ENSCHIG00000025478;ENSCHIG00000026695	K06625+K22608+K07436+K07763+K07997+K09036+K08003+K14683+K04361+K07994+K08523+K08045+K05858+K08042+K08539+K04345+K08041+K09048+K08526
Environmental Information Processing	Signal transduction	Phospholipase D signaling pathway	27	161	0.167702	0.013486	0.0775244	ko04072	ENSCHIG00000000474;ENSCHIG00000005194;ENSCHIG00000009050;ENSCHIG00000010165;ENSCHIG00000011470;ENSCHIG00000011885;ENSCHIG00000012445;ENSCHIG00000013577;ENSCHIG00000013813;ENSCHIG00000014858;ENSCHIG00000014983;ENSCHIG00000015013;ENSCHIG00000015813;ENSCHIG00000017316;ENSCHIG00000019198;ENSCHIG00000019533;ENSCHIG00000019728;ENSCHIG00000020547;ENSCHIG00000020838;ENSCHIG00000022824;ENSCHIG00000022874;…	K04609+K04363+K16342+K06856+K04166+K08089+K06856+K06856+K17449+K13509+K06856+K00889+K04604+K04294+K16342+K04273+K00922+K04361+K05050+K06856+K08045+K05858+K08042+K08041+K06856+K16342+K16342
Cellular Processes	Transport and catabolism	Peroxisome	14	84	0.166667	0.0657938	0.229593	ko04146	ENSCHIG00000001947;ENSCHIG00000011546;ENSCHIG00000012760;ENSCHIG00000014174;ENSCHIG00000016201;ENSCHIG00000016543;ENSCHIG00000017276;ENSCHIG00000017535;ENSCHIG00000022496;ENSCHIG00000022508;ENSCHIG00000022769;ENSCHIG00000024473;ENSCHIG00000024836;ENSCHIG00000026977	K00272+K00306+K00273+K10214+K13239+K08746+K00106+K05940+K00830+K01897+K13241+K13273+K00659+K01640
Organismal Systems	Nervous system	Synaptic vesicle cycle	14	84	0.166667	0.0657938	0.229593	ko04721	ENSCHIG00000003163;ENSCHIG00000005457;ENSCHIG00000010324;ENSCHIG00000011011;ENSCHIG00000011623;ENSCHIG00000012743;ENSCHIG00000014286;ENSCHIG00000016894;ENSCHIG00000017045;ENSCHIG00000017272;ENSCHIG00000020293;ENSCHIG00000021410;ENSCHIG00000022198;ENSCHIG00000026700	K05037+K04849+K14636+K15291+K02153+K15293+K02147+K12302+K05614+K02148+K18211+K05036+K05040+K05038
Human Diseases	Immune disease	Allograft rejection	14	84	0.166667	0.0657938	0.229593	ko05330	ENSCHIG00000000135;ENSCHIG00000010165;ENSCHIG00000010779;ENSCHIG00000012445;ENSCHIG00000013577;ENSCHIG00000014983;ENSCHIG00000016245;ENSCHIG00000020332;ENSCHIG00000020617;ENSCHIG00000021365;ENSCHIG00000021899;ENSCHIG00000022005;ENSCHIG00000022824;ENSCHIG00000024628	K07818+K06856+K06751+K06856+K06856+K06856+K01353+K01353+K01353+K10785+K06751+K01353+K06856+K06856
Organismal Systems	Endocrine system	Cortisol synthesis and secretion	11	66	0.166667	0.0955298	0.296319	ko04927	ENSCHIG00000001648;ENSCHIG00000008392;ENSCHIG00000010531;ENSCHIG00000011470;ENSCHIG00000021436;ENSCHIG00000022874;ENSCHIG00000023493;ENSCHIG00000023502;ENSCHIG00000024391;ENSCHIG00000024549;ENSCHIG00000025478	K04877+K04854+K00513+K04166+K04913+K08045+K05858+K08042+K04345+K08041+K09048
Human Diseases	Substance dependence	Cocaine addiction	8	48	0.166667	0.141727	0.409299	ko05030	ENSCHIG00000004376;ENSCHIG00000013689;ENSCHIG00000021410;ENSCHIG00000022874;ENSCHIG00000024391;ENSCHIG00000025478;ENSCHIG00000026891;ENSCHIG00000027251	K11716+K01593+K05036+K08045+K04345+K09048+K05214+K15494
Metabolism	Metabolism of other amino acids	Phosphonate and phosphinate metabolism	1	6	0.166667	0.496987	0.842145	ko00440	ENSCHIG00000009936	K00994
Environmental Information Processing	Signaling molecules and interaction	ECM-receptor interaction	14	85	0.164706	0.0713054	0.243748	ko04512	ENSCHIG00000005295;ENSCHIG00000006565;ENSCHIG00000011086;ENSCHIG00000013633;ENSCHIG00000016627;ENSCHIG00000018630;ENSCHIG00000019429;ENSCHIG00000021319;ENSCHIG00000022140;ENSCHIG00000024483;ENSCHIG00000025296;ENSCHIG00000025639;ENSCHIG00000025647;ENSCHIG00000025745	K05637+K06252+K05637+K06240+K04659+K06238+K06591+K06236+K06252+K04659+K06587+K06258+K06236+K06247
Organismal Systems	Endocrine system	GnRH signaling pathway	15	92	0.163043	0.0682567	0.235732	ko04912	ENSCHIG00000005207;ENSCHIG00000009050;ENSCHIG00000011010;ENSCHIG00000012374;ENSCHIG00000018583;ENSCHIG00000019198;ENSCHIG00000020547;ENSCHIG00000022689;ENSCHIG00000022874;ENSCHIG00000023493;ENSCHIG00000023502;ENSCHIG00000024391;ENSCHIG00000024549;ENSCHIG00000026459;ENSCHIG00000026712	K02183+K16342+K07763+K04440+K04441+K16342+K04361+K08523+K08045+K05858+K08042+K04345+K08041+K16342+K16342
Human Diseases	Cardiovascular disease	Arrhythmogenic right ventricular cardiomyopathy	13	80	0.1625	0.0872508	0.287358	ko05412	ENSCHIG00000003901;ENSCHIG00000005295;ENSCHIG00000008416;ENSCHIG00000011086;ENSCHIG00000013367;ENSCHIG00000013613;ENSCHIG00000016271;ENSCHIG00000018453;ENSCHIG00000018662;ENSCHIG00000019429;ENSCHIG00000020827;ENSCHIG00000025296;ENSCHIG00000026333	K07372+K05637+K07610+K05637+K04865+K10381+K07597+K05853+K06736+K06591+K07601+K06587+K10056
Environmental Information Processing	Signaling molecules and interaction	Cell adhesion molecules	29	179	0.162011	0.0168621	0.0882625	ko04514	ENSCHIG00000004105;ENSCHIG00000004293;ENSCHIG00000007626;ENSCHIG00000007634;ENSCHIG00000008873;ENSCHIG00000010188;ENSCHIG00000010703;ENSCHIG00000010779;ENSCHIG00000011093;ENSCHIG00000011663;ENSCHIG00000013329;ENSCHIG00000013703;ENSCHIG00000016778;ENSCHIG00000017104;ENSCHIG00000018662;ENSCHIG00000019162;ENSCHIG00000019429;ENSCHIG00000020344;ENSCHIG00000020420;ENSCHIG00000021260;ENSCHIG00000021365;…	K06087+K06087+K06797+K06791+K06087+K16360+K06766+K06751+K06779+K06796+K07377+K06710+K07377+K06548+K06736+K06592+K06591+K06459+K06087+K06087+K10785+K06751+K06496+K06539+K06087+K07380+K06081+K06458+K07377
Human Diseases	Immune disease	Asthma	9	56	0.160714	0.146119	0.418374	ko05310	ENSCHIG00000010165;ENSCHIG00000011885;ENSCHIG00000012445;ENSCHIG00000012968;ENSCHIG00000013577;ENSCHIG00000014983;ENSCHIG00000021365;ENSCHIG00000022824;ENSCHIG00000024628	K06856+K08089+K06856+K16597+K06856+K06856+K10785+K06856+K06856
Organismal Systems	Nervous system	Serotonergic synapse	21	131	0.160305	0.0418842	0.17539	ko04726	ENSCHIG00000000426;ENSCHIG00000003163;ENSCHIG00000005457;ENSCHIG00000009050;ENSCHIG00000013689;ENSCHIG00000017073;ENSCHIG00000017340;ENSCHIG00000018265;ENSCHIG00000018610;ENSCHIG00000019198;ENSCHIG00000019661;ENSCHIG00000019693;ENSCHIG00000022168;ENSCHIG00000022550;ENSCHIG00000022715;ENSCHIG00000022813;ENSCHIG00000022874;ENSCHIG00000023493;ENSCHIG00000024391;ENSCHIG00000026459;ENSCHIG00000026712	K04541+K05037+K04849+K16342+K01593+K04819+K07414+K04163+K08022+K16342+K04161+K07413+K00502+K07413+K04160+K08021+K08045+K05858+K04345+K16342+K16342
Metabolism	Amino acid metabolism	Arginine and proline metabolism	8	50	0.16	0.167506	0.441846	ko00330	ENSCHIG00000012760;ENSCHIG00000014280;ENSCHIG00000022069;ENSCHIG00000022769;ENSCHIG00000024430;ENSCHIG00000024701;ENSCHIG00000026349;ENSCHIG00000026472	K00273+K00819+K01476+K13241+K01583+K00933+K00819+K01480
Organismal Systems	Digestive system	Vitamin digestion and absorption	4	25	0.16	0.282648	0.620948	ko04977	ENSCHIG00000016591;ENSCHIG00000020719;ENSCHIG00000021348;ENSCHIG00000027152	K14611+K14620+K08757+K14622
Human Diseases	Cancer: specific types	Breast cancer	23	144	0.159722	0.0357013	0.159466	ko05224	ENSCHIG00000006042;ENSCHIG00000007326;ENSCHIG00000007513;ENSCHIG00000008551;ENSCHIG00000010919;ENSCHIG00000011455;ENSCHIG00000011683;ENSCHIG00000013813;ENSCHIG00000014378;ENSCHIG00000014632;ENSCHIG00000015794;ENSCHIG00000016159;ENSCHIG00000016952;ENSCHIG00000018863;ENSCHIG00000019728;ENSCHIG00000020547;ENSCHIG00000020738;ENSCHIG00000021782;ENSCHIG00000022296;ENSCHIG00000022853;ENSCHIG00000023410;…	K06625+K09389+K02375+K02842+K01357+K04358+K08551+K17449+K00444+K00572+K21635+K00312+K20995+K05459+K00922+K04361+K04358+K01384+K00714+K01357+K00445+K02354+K02432
Organismal Systems	Nervous system	Glutamatergic synapse	20	126	0.15873	0.0504846	0.197302	ko04724	ENSCHIG00000000426;ENSCHIG00000000474;ENSCHIG00000009050;ENSCHIG00000013425;ENSCHIG00000014529;ENSCHIG00000015813;ENSCHIG00000016894;ENSCHIG00000017045;ENSCHIG00000019198;ENSCHIG00000021980;ENSCHIG00000022874;ENSCHIG00000023089;ENSCHIG00000023493;ENSCHIG00000023502;ENSCHIG00000023742;ENSCHIG00000024391;ENSCHIG00000024549;ENSCHIG00000026459;ENSCHIG00000026712;ENSCHIG00000026891	K04541+K04609+K16342+K15010+K15010+K04604+K12302+K05614+K16342+K05202+K08045+K13576+K05858+K08042+K15009+K04345+K08041+K16342+K16342+K05214
Human Diseases	Substance dependence	Nicotine addiction	6	38	0.157895	0.223472	0.530945	ko05033	ENSCHIG00000005457;ENSCHIG00000013352;ENSCHIG00000016894;ENSCHIG00000023746;ENSCHIG00000024125;ENSCHIG00000026891	K04849+K05190+K12302+K05175+K04808+K05214
Metabolism	Metabolism of other amino acids	Selenocompound metabolism	3	19	0.157895	0.33889	0.694349	ko00450	ENSCHIG00000000324;ENSCHIG00000007800;ENSCHIG00000013444	K00548+K13811+K13811
Metabolism	Global and overview maps	Fatty acid metabolism	10	64	0.15625	0.148956	0.422885	ko01212	ENSCHIG00000000476;ENSCHIG00000002685;ENSCHIG00000013637;ENSCHIG00000015460;ENSCHIG00000017259;ENSCHIG00000022314;ENSCHIG00000022508;ENSCHIG00000023872;ENSCHIG00000024466;ENSCHIG00000026063	K07511+K10250+K00022+K10226+K10249+K10224+K01897+K10251+K07508+K10203
Cellular Processes	Cell growth and death	Apoptosis - multiple species	7	45	0.155556	0.208706	0.513623	ko04215	ENSCHIG00000001342;ENSCHIG00000006056;ENSCHIG00000011503;ENSCHIG00000012374;ENSCHIG00000019080;ENSCHIG00000024623;ENSCHIG00000025853	K08738+K08738+K04397+K04440+K02583+K16943+K08738
Organismal Systems	Immune system	Fc gamma R-mediated phagocytosis	17	112	0.151786	0.0937858	0.293629	ko04666	ENSCHIG00000003071;ENSCHIG00000009050;ENSCHIG00000010165;ENSCHIG00000012445;ENSCHIG00000013577;ENSCHIG00000014472;ENSCHIG00000014983;ENSCHIG00000015013;ENSCHIG00000018019;ENSCHIG00000019198;ENSCHIG00000019728;ENSCHIG00000022824;ENSCHIG00000024628;ENSCHIG00000024845;ENSCHIG00000025999;ENSCHIG00000026459;ENSCHIG00000026712	K04409+K16342+K06856+K06856+K06856+K05768+K06856+K00889+K05744+K16342+K00922+K06856+K06856+K07860+K18050+K16342+K16342
Organismal Systems	Immune system	Chemokine signaling pathway	29	192	0.151042	0.0392492	0.16857	ko04062	ENSCHIG00000000426;ENSCHIG00000003071;ENSCHIG00000004359;ENSCHIG00000006150;ENSCHIG00000007770;ENSCHIG00000010803;ENSCHIG00000012602;ENSCHIG00000012968;ENSCHIG00000013813;ENSCHIG00000015403;ENSCHIG00000016688;ENSCHIG00000017060;ENSCHIG00000017407;ENSCHIG00000017920;ENSCHIG00000019145;ENSCHIG00000019728;ENSCHIG00000020041;ENSCHIG00000020624;ENSCHIG00000020838;ENSCHIG00000022701;ENSCHIG00000022874;…	K04541+K04409+K21093+K04185+K04192+K21097+K05513+K16597+K17449+K12671+K12499+K05507+K12672+K05731+K04182+K00922+K04179+K04177+K05050+K21095+K08045+K05858+K08042+K05505+K04345+K08041+K07860+K05505+K13072
Metabolism	Lipid metabolism	Steroid biosynthesis	3	20	0.15	0.369837	0.720323	ko00100	ENSCHIG00000009239;ENSCHIG00000021424;ENSCHIG00000025165	K07436+K00637+K00637
Environmental Information Processing	Signaling molecules and interaction	Neuroactive ligand-receptor interaction	52	351	0.148148	0.0110419	0.0712882	ko04080	ENSCHIG00000000474;ENSCHIG00000002663;ENSCHIG00000004634;ENSCHIG00000006692;ENSCHIG00000006724;ENSCHIG00000006885;ENSCHIG00000007230;ENSCHIG00000008260;ENSCHIG00000008409;ENSCHIG00000009730;ENSCHIG00000010864;ENSCHIG00000011041;ENSCHIG00000011236;ENSCHIG00000011373;ENSCHIG00000011470;ENSCHIG00000012488;ENSCHIG00000013164;ENSCHIG00000013199;ENSCHIG00000013352;ENSCHIG00000014052;ENSCHIG00000014675;…	K04609+K04138+K04276+K05237+K04297+K04151+K01352+K04296+K04218+K04269+K05081+K03994+K04131+K03898+K04166+K04129+K01352+K04295+K05190+K25369+K25368+K05264+K04604+K04231+K05227+K04294+K04195+K04163+K04206+K25367+K04273+K04161+K04578+K04224+K21999+K04135+K05259+K04589+K05202+K05220+K04160+K05216+K04581+K05239+K05062+K05175+K04808+K05244+K04615+K05233+K04582+K05214
Metabolism	Global and overview maps	Metabolic pathways	253	1710	0.147953	7.7932e-09	8.7024e-07	ko01100	ENSCHIG00000000324;ENSCHIG00000000421;ENSCHIG00000000476;ENSCHIG00000000508;ENSCHIG00000000945;ENSCHIG00000001342;ENSCHIG00000001672;ENSCHIG00000001690;ENSCHIG00000001864;ENSCHIG00000001947;ENSCHIG00000001958;ENSCHIG00000002050;ENSCHIG00000002685;ENSCHIG00000003073;ENSCHIG00000003087;ENSCHIG00000003090;ENSCHIG00000003246;ENSCHIG00000003265;ENSCHIG00000003874;ENSCHIG00000004184;ENSCHIG00000004358;…	K00548+K07553+K07511+K01513+K03376+K08738+K08748+K01672+K00710+K00272+K15631+K19006+K10250+K00016+K05304+K01623+K21749+K00739+K01242+K01596+K00071+K01672+K00079+K07820+K08738+K12406+K07965+K01950+K00717+K00939+K13811+K11067+K11529+K01441+K09663+K10572+K16342+K07424+K07964+K07436+K00799+K00789+K11431+K13517+K20967+K13296+K00940+K12320+K00994+K00108+K01047+K01203+K11160+K03783+K01047+K00513+K00016+…
Organismal Systems	Circulatory system	Vascular smooth muscle contraction	22	149	0.147651	0.0803494	0.269171	ko04270	ENSCHIG00000005207;ENSCHIG00000009050;ENSCHIG00000010082;ENSCHIG00000010431;ENSCHIG00000011377;ENSCHIG00000011470;ENSCHIG00000016550;ENSCHIG00000017167;ENSCHIG00000019198;ENSCHIG00000020720;ENSCHIG00000021001;ENSCHIG00000022339;ENSCHIG00000022874;ENSCHIG00000023493;ENSCHIG00000023502;ENSCHIG00000024391;ENSCHIG00000024549;ENSCHIG00000024591;ENSCHIG00000025127;ENSCHIG00000025999;ENSCHIG00000026459;…	K02183+K16342+K01047+K01047+K01047+K04166+K01047+K05227+K16342+K01047+K04135+K01047+K08045+K05858+K08042+K04345+K08041+K01047+K04936+K18050+K16342+K16342
Organismal Systems	Endocrine system	GnRH secretion	9	61	0.147541	0.209538	0.513623	ko04929	ENSCHIG00000008392;ENSCHIG00000009617;ENSCHIG00000011683;ENSCHIG00000014377;ENSCHIG00000018108;ENSCHIG00000019728;ENSCHIG00000021893;ENSCHIG00000023493;ENSCHIG00000024967	K04854+K05004+K08551+K04942+K04945+K00922+K04955+K05858+K04615
Human Diseases	Cancer: overview	Proteoglycans in cancer	31	211	0.146919	0.0469355	0.190177	ko05205	ENSCHIG00000003071;ENSCHIG00000006042;ENSCHIG00000007017;ENSCHIG00000007513;ENSCHIG00000007920;ENSCHIG00000008551;ENSCHIG00000009216;ENSCHIG00000010919;ENSCHIG00000011771;ENSCHIG00000014378;ENSCHIG00000014632;ENSCHIG00000016159;ENSCHIG00000016564;ENSCHIG00000016983;ENSCHIG00000017920;ENSCHIG00000018583;ENSCHIG00000018863;ENSCHIG00000019728;ENSCHIG00000020547;ENSCHIG00000020875;ENSCHIG00000021319;…	K04409+K06625+K07965+K02375+K09069+K02842+K07964+K01357+K09295+K00444+K00572+K00312+K11989+K01403+K05731+K04441+K05459+K00922+K04361+K01365+K06236+K01384+K00714+K08523+K01357+K00445+K08122+K04345+K06236+K02354+K02432
Human Diseases	Cardiovascular disease	Viral myocarditis	16	109	0.146789	0.126744	0.375745	ko05416	ENSCHIG00000000135;ENSCHIG00000001342;ENSCHIG00000005295;ENSCHIG00000006056;ENSCHIG00000010165;ENSCHIG00000010779;ENSCHIG00000011086;ENSCHIG00000012445;ENSCHIG00000013577;ENSCHIG00000014983;ENSCHIG00000021365;ENSCHIG00000021899;ENSCHIG00000022824;ENSCHIG00000024628;ENSCHIG00000024845;ENSCHIG00000025853	K07818+K08738+K05637+K08738+K06856+K06751+K05637+K06856+K06856+K06856+K10785+K06751+K06856+K06856+K07860+K08738
Metabolism	Amino acid metabolism	Glycine, serine and threonine metabolism	7	48	0.145833	0.258714	0.589586	ko00260	ENSCHIG00000008125;ENSCHIG00000010045;ENSCHIG00000011546;ENSCHIG00000012760;ENSCHIG00000022496;ENSCHIG00000023475;ENSCHIG00000026364	K11529+K00108+K00306+K00273+K00830+K00831+K00552
Human Diseases	Immune disease	Autoimmune thyroid disease	14	97	0.14433	0.16067	0.437597	ko05320	ENSCHIG00000000135;ENSCHIG00000010165;ENSCHIG00000010779;ENSCHIG00000012445;ENSCHIG00000013577;ENSCHIG00000014983;ENSCHIG00000016245;ENSCHIG00000020332;ENSCHIG00000020617;ENSCHIG00000021365;ENSCHIG00000021899;ENSCHIG00000022005;ENSCHIG00000022824;ENSCHIG00000024628	K07818+K06856+K06751+K06856+K06856+K06856+K01353+K01353+K01353+K10785+K06751+K01353+K06856+K06856
Environmental Information Processing	Signal transduction	Ras signaling pathway	38	264	0.143939	0.0399482	0.1694	ko04014	ENSCHIG00000000426;ENSCHIG00000003071;ENSCHIG00000005194;ENSCHIG00000005207;ENSCHIG00000009050;ENSCHIG00000010017;ENSCHIG00000010082;ENSCHIG00000010431;ENSCHIG00000011083;ENSCHIG00000011377;ENSCHIG00000011455;ENSCHIG00000012374;ENSCHIG00000012809;ENSCHIG00000013813;ENSCHIG00000016166;ENSCHIG00000016550;ENSCHIG00000017920;ENSCHIG00000018265;ENSCHIG00000018863;ENSCHIG00000019080;ENSCHIG00000019198;…	K04541+K04409+K04363+K02183+K16342+K17632+K01047+K01047+K16817+K01047+K04358+K04440+K13618+K17449+K16817+K01047+K05731+K04163+K05459+K02583+K16342+K00922+K04361+K01047+K04358+K10785+K16859+K01047+K04360+K05462+K05095+K04345+K01047+K07860+K17638+K16342+K16342+K05090
Metabolism	Carbohydrate metabolism	Inositol phosphate metabolism	10	70	0.142857	0.221366	0.530945	ko00562	ENSCHIG00000002050;ENSCHIG00000008640;ENSCHIG00000012389;ENSCHIG00000015013;ENSCHIG00000019158;ENSCHIG00000019728;ENSCHIG00000022749;ENSCHIG00000023493;ENSCHIG00000024716;ENSCHIG00000025100	K19006+K10572+K00911+K00889+K00923+K00922+K01092+K05858+K19006+K05857
Metabolism	Amino acid metabolism	Phenylalanine, tyrosine and tryptophan biosynthesis	1	7	0.142857	0.551439	0.879676	ko00400	ENSCHIG00000018390	K00815
Cellular Processes	Cell growth and death	p53 signaling pathway	14	99	0.141414	0.179599	0.466401	ko04115	ENSCHIG00000001148;ENSCHIG00000001342;ENSCHIG00000005122;ENSCHIG00000005339;ENSCHIG00000006042;ENSCHIG00000006056;ENSCHIG00000006667;ENSCHIG00000010978;ENSCHIG00000015047;ENSCHIG00000018863;ENSCHIG00000020858;ENSCHIG00000022311;ENSCHIG00000024310;ENSCHIG00000025853	K06644+K08738+K04722+K10128+K06625+K08738+K04722+K10139+K10136+K05459+K03982+K04722+K10138+K08738
Organismal Systems	Development and regeneration	Axon guidance	26	184	0.141304	0.0930558	0.293629	ko04360	ENSCHIG00000001025;ENSCHIG00000003071;ENSCHIG00000008645;ENSCHIG00000010703;ENSCHIG00000012230;ENSCHIG00000014378;ENSCHIG00000015303;ENSCHIG00000017301;ENSCHIG00000017686;ENSCHIG00000017761;ENSCHIG00000018019;ENSCHIG00000018089;ENSCHIG00000018998;ENSCHIG00000019315;ENSCHIG00000019728;ENSCHIG00000021379;ENSCHIG00000021859;ENSCHIG00000021949;ENSCHIG00000022795;ENSCHIG00000023314;ENSCHIG00000024845;…	K06753+K04409+K07525+K06766+K06754+K00444+K05114+K06753+K06521+K13578+K05744+K06842+K06820+K07520+K00922+K05102+K06093+K06840+K05111+K05462+K07860+K05105+K06754+K04966+K20020+K07524
Metabolism	Lipid metabolism	Glycerolipid metabolism	10	71	0.140845	0.234619	0.553503	ko00561	ENSCHIG00000008125;ENSCHIG00000009573;ENSCHIG00000010320;ENSCHIG00000011772;ENSCHIG00000012869;ENSCHIG00000013810;ENSCHIG00000014858;ENSCHIG00000015994;ENSCHIG00000017465;ENSCHIG00000025469	K11529+K13517+K11160+K14075+K13534+K18693+K13509+K22284+K14457+K13506
Human Diseases	Immune disease	Rheumatoid arthritis	18	129	0.139535	0.155435	0.433921	ko05323	ENSCHIG00000010165;ENSCHIG00000011623;ENSCHIG00000012445;ENSCHIG00000013577;ENSCHIG00000014286;ENSCHIG00000014983;ENSCHIG00000016688;ENSCHIG00000017272;ENSCHIG00000019003;ENSCHIG00000020875;ENSCHIG00000021365;ENSCHIG00000022239;ENSCHIG00000022824;ENSCHIG00000024071;ENSCHIG00000024469;ENSCHIG00000024628;ENSCHIG00000025614;ENSCHIG00000026175	K06856+K02153+K06856+K06856+K02147+K06856+K12499+K02148+K05475+K01365+K10785+K05489+K06856+K05505+K04519+K06856+K05147+K05505
Human Diseases	Cancer: specific types	Hepatocellular carcinoma	24	174	0.137931	0.126053	0.375745	ko05225	ENSCHIG00000006042;ENSCHIG00000007326;ENSCHIG00000007513;ENSCHIG00000008229;ENSCHIG00000008551;ENSCHIG00000009359;ENSCHIG00000010819;ENSCHIG00000010919;ENSCHIG00000010963;ENSCHIG00000013282;ENSCHIG00000013813;ENSCHIG00000014378;ENSCHIG00000014632;ENSCHIG00000015669;ENSCHIG00000016159;ENSCHIG00000019728;ENSCHIG00000020547;ENSCHIG00000021782;ENSCHIG00000022296;ENSCHIG00000022853;ENSCHIG00000023410;…	K06625+K09389+K02375+K11126+K02842+K00799+K00799+K01357+K00799+K00799+K17449+K00444+K00572+K23790+K00312+K00922+K04361+K01384+K00714+K01357+K00445+K00799+K02354+K02432
Organismal Systems	Endocrine system	Aldosterone synthesis and secretion	14	102	0.137255	0.209919	0.513623	ko04925	ENSCHIG00000005207;ENSCHIG00000008392;ENSCHIG00000010531;ENSCHIG00000011470;ENSCHIG00000020106;ENSCHIG00000022281;ENSCHIG00000022874;ENSCHIG00000023493;ENSCHIG00000023502;ENSCHIG00000023627;ENSCHIG00000024391;ENSCHIG00000024549;ENSCHIG00000025478;ENSCHIG00000025999	K02183+K04854+K00513+K04166+K13806+K04919+K08045+K05858+K08042+K01540+K04345+K08041+K09048+K18050
Metabolism	Glycan biosynthesis and metabolism	Glycosaminoglycan degradation	3	22	0.136364	0.43074	0.779989	ko00531	ENSCHIG00000007017;ENSCHIG00000009216;ENSCHIG00000026715	K07965+K07964+K01195
Cellular Processes	Cell growth and death	Apoptosis	21	155	0.135484	0.164321	0.440381	ko04210	ENSCHIG00000000135;ENSCHIG00000001342;ENSCHIG00000005122;ENSCHIG00000005568;ENSCHIG00000006056;ENSCHIG00000006667;ENSCHIG00000011503;ENSCHIG00000011955;ENSCHIG00000012374;ENSCHIG00000013901;ENSCHIG00000016245;ENSCHIG00000019472;ENSCHIG00000019728;ENSCHIG00000020332;ENSCHIG00000020617;ENSCHIG00000020875;ENSCHIG00000021006;ENSCHIG00000022005;ENSCHIG00000022311;ENSCHIG00000024623;ENSCHIG00000025853	K07818+K08738+K04722+K08569+K08738+K04722+K04397+K04396+K04440+K01275+K01353+K07374+K00922+K01353+K01353+K01365+K02374+K01353+K04722+K16943+K08738
Organismal Systems	Endocrine system	Relaxin signaling pathway	18	133	0.135338	0.188143	0.481129	ko04926	ENSCHIG00000000426;ENSCHIG00000012374;ENSCHIG00000013813;ENSCHIG00000016983;ENSCHIG00000018583;ENSCHIG00000019728;ENSCHIG00000020547;ENSCHIG00000020939;ENSCHIG00000021039;ENSCHIG00000021319;ENSCHIG00000022769;ENSCHIG00000022874;ENSCHIG00000023493;ENSCHIG00000023502;ENSCHIG00000024391;ENSCHIG00000024549;ENSCHIG00000025478;ENSCHIG00000025647	K04541+K04440+K17449+K01403+K04441+K00922+K04361+K21999+K07994+K06236+K13241+K08045+K05858+K08042+K04345+K08041+K09048+K06236
Environmental Information Processing	Signal transduction	mTOR signaling pathway	23	170	0.135294	0.152751	0.430012	ko04150	ENSCHIG00000001684;ENSCHIG00000006321;ENSCHIG00000007513;ENSCHIG00000008551;ENSCHIG00000010215;ENSCHIG00000010919;ENSCHIG00000014222;ENSCHIG00000014286;ENSCHIG00000014378;ENSCHIG00000014632;ENSCHIG00000015673;ENSCHIG00000016159;ENSCHIG00000017272;ENSCHIG00000018863;ENSCHIG00000019728;ENSCHIG00000020147;ENSCHIG00000021782;ENSCHIG00000022296;ENSCHIG00000022853;ENSCHIG00000023410;ENSCHIG00000023855;…	K20411+K03259+K02375+K02842+K13302+K01357+K23080+K02147+K00444+K00572+K17532+K00312+K02148+K05459+K00922+K16186+K01384+K00714+K01357+K00445+K20402+K02354+K02432
Human Diseases	Drug resistance: antineoplastic	Platinum drug resistance	12	89	0.134831	0.252051	0.578337	ko01524	ENSCHIG00000001342;ENSCHIG00000006042;ENSCHIG00000006056;ENSCHIG00000009359;ENSCHIG00000010819;ENSCHIG00000010963;ENSCHIG00000013282;ENSCHIG00000015669;ENSCHIG00000019728;ENSCHIG00000024048;ENSCHIG00000025853;ENSCHIG00000026143	K08738+K06625+K08738+K00799+K00799+K00799+K00799+K23790+K00922+K17686+K08738+K00799
Environmental Information Processing	Signal transduction	ErbB signaling pathway	11	82	0.134146	0.270193	0.611586	ko04012	ENSCHIG00000000483;ENSCHIG00000002290;ENSCHIG00000003071;ENSCHIG00000006042;ENSCHIG00000011115;ENSCHIG00000012374;ENSCHIG00000013813;ENSCHIG00000015847;ENSCHIG00000019728;ENSCHIG00000020547;ENSCHIG00000022689	K09784+K05455+K04409+K06625+K05456+K04440+K17449+K09782+K00922+K04361+K08523
Environmental Information Processing	Signal transduction	Hippo signaling pathway	23	172	0.133721	0.166393	0.441846	ko04390	ENSCHIG00000007513;ENSCHIG00000008551;ENSCHIG00000010429;ENSCHIG00000010919;ENSCHIG00000011126;ENSCHIG00000014378;ENSCHIG00000014632;ENSCHIG00000015847;ENSCHIG00000016159;ENSCHIG00000016344;ENSCHIG00000017761;ENSCHIG00000020858;ENSCHIG00000021782;ENSCHIG00000021859;ENSCHIG00000022144;ENSCHIG00000022296;ENSCHIG00000022853;ENSCHIG00000023410;ENSCHIG00000024410;ENSCHIG00000024691;ENSCHIG00000025926;…	K02375+K02842+K04663+K01357+K16796+K00444+K00572+K09782+K00312+K04354+K13578+K03982+K01384+K06093+K03213+K00714+K01357+K00445+K05706+K12075+K16682+K02354+K02432
Organismal Systems	Nervous system	Cholinergic synapse	16	120	0.133333	0.222909	0.530945	ko04725	ENSCHIG00000000426;ENSCHIG00000005457;ENSCHIG00000010300;ENSCHIG00000010324;ENSCHIG00000011236;ENSCHIG00000012488;ENSCHIG00000015594;ENSCHIG00000019728;ENSCHIG00000020793;ENSCHIG00000022874;ENSCHIG00000023493;ENSCHIG00000023502;ENSCHIG00000024125;ENSCHIG00000024391;ENSCHIG00000024549;ENSCHIG00000025478	K04541+K04849+K05005+K14636+K04131+K04129+K00623+K00922+K04926+K08045+K05858+K08042+K04808+K04345+K08041+K09048
Organismal Systems	Endocrine system	Glucagon signaling pathway	14	105	0.133333	0.242329	0.567694	ko04922	ENSCHIG00000003073;ENSCHIG00000004184;ENSCHIG00000005207;ENSCHIG00000009677;ENSCHIG00000010543;ENSCHIG00000011773;ENSCHIG00000015991;ENSCHIG00000018372;ENSCHIG00000021277;ENSCHIG00000023493;ENSCHIG00000023502;ENSCHIG00000024391;ENSCHIG00000024702;ENSCHIG00000025478	K00016+K01596+K02183+K13296+K00016+K00016+K07202+K00016+K05259+K05858+K08042+K04345+K01596+K09048
Organismal Systems	Sensory system	Phototransduction	4	30	0.133333	0.410595	0.768432	ko04744	ENSCHIG00000005207;ENSCHIG00000013825;ENSCHIG00000017922;ENSCHIG00000025103	K02183+K04948+K08718+K04631
Human Diseases	Cancer: overview	Transcriptional misregulation in cancer	31	233	0.133047	0.130083	0.380623	ko05202	ENSCHIG00000000814;ENSCHIG00000004716;ENSCHIG00000006042;ENSCHIG00000007488;ENSCHIG00000008305;ENSCHIG00000010165;ENSCHIG00000011350;ENSCHIG00000012445;ENSCHIG00000013577;ENSCHIG00000014836;ENSCHIG00000014983;ENSCHIG00000016245;ENSCHIG00000016983;ENSCHIG00000018863;ENSCHIG00000019080;ENSCHIG00000020332;ENSCHIG00000020568;ENSCHIG00000020617;ENSCHIG00000021365;ENSCHIG00000022001;ENSCHIG00000022005;…	K15379+K21950+K06625+K00717+K10055+K06856+K04391+K06856+K06856+K17443+K06856+K01353+K01403+K05459+K02583+K01353+K21951+K01353+K10785+K15616+K01353+K06856+K04387+K10138+K09633+K06856+K06532+K10056+K08526+K05090+K15613
Human Diseases	Cancer: overview	MicroRNAs in cancer	23	173	0.132948	0.173456	0.453966	ko05206	ENSCHIG00000000814;ENSCHIG00000005194;ENSCHIG00000006042;ENSCHIG00000006565;ENSCHIG00000007326;ENSCHIG00000008359;ENSCHIG00000009239;ENSCHIG00000010978;ENSCHIG00000011771;ENSCHIG00000012382;ENSCHIG00000013419;ENSCHIG00000013676;ENSCHIG00000013813;ENSCHIG00000016159;ENSCHIG00000016952;ENSCHIG00000016983;ENSCHIG00000019728;ENSCHIG00000020204;ENSCHIG00000020547;ENSCHIG00000022140;ENSCHIG00000023314;…	K15379+K04363+K06625+K06252+K09389+K17383+K07436+K10139+K09295+K07410+K23581+K23551+K17449+K00312+K20995+K01403+K00922+K10373+K04361+K06252+K05462+K10149+K18050
Organismal Systems	Digestive system	Protein digestion and absorption	17	128	0.132812	0.218789	0.530945	ko04974	ENSCHIG00000000423;ENSCHIG00000004672;ENSCHIG00000007308;ENSCHIG00000013715;ENSCHIG00000016493;ENSCHIG00000018073;ENSCHIG00000018108;ENSCHIG00000018630;ENSCHIG00000019030;ENSCHIG00000019062;ENSCHIG00000020793;ENSCHIG00000021319;ENSCHIG00000022634;ENSCHIG00000023627;ENSCHIG00000023773;ENSCHIG00000023822;ENSCHIG00000025647	K08606+K04897+K24358+K07603+K23455+K14211+K04945+K06238+K14206+K08132+K04926+K06236+K04916+K01540+K08187+K24339+K06236
Human Diseases	Endocrine and metabolic disease	Type I diabetes mellitus	11	83	0.13253	0.283597	0.620948	ko04940	ENSCHIG00000000135;ENSCHIG00000010779;ENSCHIG00000014039;ENSCHIG00000016245;ENSCHIG00000018892;ENSCHIG00000020332;ENSCHIG00000020617;ENSCHIG00000021365;ENSCHIG00000021899;ENSCHIG00000022005;ENSCHIG00000024469	K07818+K06751+K07817+K01353+K07817+K01353+K01353+K10785+K06751+K01353+K04519
Organismal Systems	Development and regeneration	Axon regeneration	3	23	0.130435	0.460402	0.798759	ko04361	ENSCHIG00000017087;ENSCHIG00000018583;ENSCHIG00000025408	K09442+K04441+K06754
Human Diseases	Infectious disease: bacterial	Legionellosis	10	77	0.12987	0.319362	0.668663	ko05134	ENSCHIG00000001342;ENSCHIG00000006056;ENSCHIG00000011350;ENSCHIG00000011503;ENSCHIG00000016589;ENSCHIG00000016843;ENSCHIG00000024071;ENSCHIG00000024469;ENSCHIG00000025853;ENSCHIG00000026175	K08738+K08738+K04391+K04397+K03231+K15464+K05505+K04519+K08738+K05505
Environmental Information Processing	Signal transduction	HIF-1 signaling pathway	17	131	0.129771	0.248164	0.573345	ko04066	ENSCHIG00000003073;ENSCHIG00000003090;ENSCHIG00000006042;ENSCHIG00000006321;ENSCHIG00000010543;ENSCHIG00000010678;ENSCHIG00000011773;ENSCHIG00000012393;ENSCHIG00000012394;ENSCHIG00000016948;ENSCHIG00000018278;ENSCHIG00000018372;ENSCHIG00000018863;ENSCHIG00000019728;ENSCHIG00000020547;ENSCHIG00000020858;ENSCHIG00000022769	K00016+K01623+K06625+K03259+K00016+K00844+K00016+K00844+K05055+K09592+K01689+K00016+K05459+K00922+K04361+K03982+K13241
Cellular Processes	Cellular community - eukaryotes	Gap junction	12	93	0.129032	0.303012	0.647483	ko04540	ENSCHIG00000003901;ENSCHIG00000005194;ENSCHIG00000014973;ENSCHIG00000015813;ENSCHIG00000019472;ENSCHIG00000020547;ENSCHIG00000022874;ENSCHIG00000023493;ENSCHIG00000023502;ENSCHIG00000024391;ENSCHIG00000024549;ENSCHIG00000025595	K07372+K04363+K19477+K04604+K07374+K04361+K08045+K05858+K08042+K04345+K08041+K07375
Metabolism	Carbohydrate metabolism	Galactose metabolism	4	31	0.129032	0.43591	0.784357	ko00052	ENSCHIG00000010240;ENSCHIG00000010678;ENSCHIG00000012393;ENSCHIG00000015889	K01203+K00844+K00844+K12047
Organismal Systems	Digestive system	Mineral absorption	9	70	0.128571	0.344066	0.694349	ko04978	ENSCHIG00000005671;ENSCHIG00000011959;ENSCHIG00000015739;ENSCHIG00000019540;ENSCHIG00000019917;ENSCHIG00000020739;ENSCHIG00000023586;ENSCHIG00000023627;ENSCHIG00000024048	K14737+K14706+K14683+K14710+K04981+K14738+K08539+K01540+K17686
Human Diseases	Endocrine and metabolic disease	Insulin resistance	14	109	0.12844	0.288288	0.62712	ko04931	ENSCHIG00000001672;ENSCHIG00000004184;ENSCHIG00000006614;ENSCHIG00000011290;ENSCHIG00000012374;ENSCHIG00000015991;ENSCHIG00000016543;ENSCHIG00000019728;ENSCHIG00000020419;ENSCHIG00000021854;ENSCHIG00000024533;ENSCHIG00000024702;ENSCHIG00000025478;ENSCHIG00000025999	K08748+K01596+K07189+K04696+K04440+K07202+K08746+K00922+K17902+K00820+K08749+K01596+K09048+K18050
Organismal Systems	Endocrine system	Growth hormone synthesis, secretion and action	15	117	0.128205	0.28143	0.620948	ko04935	ENSCHIG00000006692;ENSCHIG00000008409;ENSCHIG00000011290;ENSCHIG00000012374;ENSCHIG00000013813;ENSCHIG00000018583;ENSCHIG00000018863;ENSCHIG00000019728;ENSCHIG00000022874;ENSCHIG00000023493;ENSCHIG00000023502;ENSCHIG00000024310;ENSCHIG00000024391;ENSCHIG00000024549;ENSCHIG00000025478	K05237+K04218+K04696+K04440+K17449+K04441+K05459+K00922+K08045+K05858+K08042+K10138+K04345+K08041+K09048
Human Diseases	Cancer: specific types	Bladder cancer	5	39	0.128205	0.416209	0.770993	ko05219	ENSCHIG00000006042;ENSCHIG00000007326;ENSCHIG00000016983;ENSCHIG00000020547;ENSCHIG00000022689	K06625+K09389+K01403+K04361+K08523
Human Diseases	Cancer: specific types	Prostate cancer	12	96	0.125	0.342889	0.694349	ko05215	ENSCHIG00000005194;ENSCHIG00000006042;ENSCHIG00000007326;ENSCHIG00000010463;ENSCHIG00000015669;ENSCHIG00000016983;ENSCHIG00000018863;ENSCHIG00000019728;ENSCHIG00000020547;ENSCHIG00000024086;ENSCHIG00000024477;ENSCHIG00000025478	K04363+K06625+K09389+K09348+K23790+K01403+K05459+K00922+K04361+K04387+K09633+K09048
Organismal Systems	Aging	Longevity regulating pathway - worm	2	16	0.125	0.529298	0.85769	ko04212	ENSCHIG00000013282;ENSCHIG00000018583	K00799+K04441
Environmental Information Processing	Signal transduction	PI3K-Akt signaling pathway	50	401	0.124688	0.156875	0.434325	ko04151	ENSCHIG00000000426;ENSCHIG00000000483;ENSCHIG00000004184;ENSCHIG00000005194;ENSCHIG00000005295;ENSCHIG00000006042;ENSCHIG00000006321;ENSCHIG00000006565;ENSCHIG00000009367;ENSCHIG00000009914;ENSCHIG00000010165;ENSCHIG00000010215;ENSCHIG00000010864;ENSCHIG00000011086;ENSCHIG00000011455;ENSCHIG00000012394;ENSCHIG00000012445;ENSCHIG00000012488;ENSCHIG00000013577;ENSCHIG00000013633;ENSCHIG00000014983;…	K04541+K09784+K01596+K04363+K05637+K06625+K03259+K06252+K05057+K09420+K06856+K13302+K05081+K05637+K04358+K05055+K06856+K04129+K06856+K06240+K06856+K09782+K04354+K04659+K04294+K06238+K05459+K02583+K06591+K04273+K00922+K04361+K04358+K05072+K06236+K16859+K06252+K13303+K06856+K04360+K05462+K05095+K04659+K06856+K01596+K06587+K09048+K06236+K06247+K05090
Human Diseases	Endocrine and metabolic disease	AGE-RAGE signaling pathway in diabetic complications	12	97	0.123711	0.356405	0.710688	ko04933	ENSCHIG00000011470;ENSCHIG00000012374;ENSCHIG00000013862;ENSCHIG00000018583;ENSCHIG00000019728;ENSCHIG00000020858;ENSCHIG00000021319;ENSCHIG00000023493;ENSCHIG00000024469;ENSCHIG00000025100;ENSCHIG00000025647;ENSCHIG00000025999	K04166+K04440+K19722+K04441+K00922+K03982+K06236+K05858+K04519+K05857+K06236+K18050
Human Diseases	Cancer: overview	Choline metabolism in cancer	12	97	0.123711	0.356405	0.710688	ko05231	ENSCHIG00000005194;ENSCHIG00000009050;ENSCHIG00000009936;ENSCHIG00000012374;ENSCHIG00000015013;ENSCHIG00000019198;ENSCHIG00000019728;ENSCHIG00000020547;ENSCHIG00000022933;ENSCHIG00000024845;ENSCHIG00000026459;ENSCHIG00000026712	K04363+K16342+K00994+K04440+K00889+K16342+K00922+K04361+K15377+K07860+K16342+K16342
Human Diseases	Cardiovascular disease	Fluid shear stress and atherosclerosis	19	154	0.123377	0.30613	0.647483	ko05418	ENSCHIG00000005207;ENSCHIG00000009359;ENSCHIG00000010819;ENSCHIG00000010963;ENSCHIG00000012374;ENSCHIG00000013024;ENSCHIG00000013282;ENSCHIG00000013785;ENSCHIG00000015669;ENSCHIG00000016983;ENSCHIG00000017761;ENSCHIG00000017801;ENSCHIG00000018583;ENSCHIG00000019728;ENSCHIG00000020875;ENSCHIG00000024086;ENSCHIG00000024469;ENSCHIG00000024845;ENSCHIG00000026143	K02183+K00799+K00799+K00799+K04440+K04386+K00799+K04973+K23790+K01403+K13578+K01940+K04441+K00922+K01365+K04387+K04519+K07860+K00799
Cellular Processes	Cellular community - eukaryotes	Focal adhesion	24	195	0.123077	0.280762	0.620948	ko04510	ENSCHIG00000003071;ENSCHIG00000005194;ENSCHIG00000005295;ENSCHIG00000006565;ENSCHIG00000011086;ENSCHIG00000012374;ENSCHIG00000013633;ENSCHIG00000013813;ENSCHIG00000015013;ENSCHIG00000016627;ENSCHIG00000018630;ENSCHIG00000018863;ENSCHIG00000019429;ENSCHIG00000019728;ENSCHIG00000020547;ENSCHIG00000021319;ENSCHIG00000021989;ENSCHIG00000022140;ENSCHIG00000024483;ENSCHIG00000024845;ENSCHIG00000025001;…	K04409+K04363+K05637+K06252+K05637+K04440+K06240+K17449+K00889+K04659+K06238+K05459+K06591+K00922+K04361+K06236+K16859+K06252+K04659+K07860+K06275+K06587+K06236+K06247
Metabolism	Amino acid metabolism	Valine, leucine and isoleucine degradation	7	57	0.122807	0.421795	0.770993	ko00280	ENSCHIG00000000476;ENSCHIG00000013439;ENSCHIG00000013637;ENSCHIG00000013677;ENSCHIG00000024466;ENSCHIG00000025654;ENSCHIG00000026977	K07511+K00157+K00022+K00157+K07508+K01641+K01640
Organismal Systems	Endocrine system	Progesterone-mediated oocyte maturation	11	90	0.122222	0.381644	0.734775	ko04914	ENSCHIG00000009677;ENSCHIG00000011829;ENSCHIG00000012374;ENSCHIG00000018583;ENSCHIG00000018863;ENSCHIG00000019728;ENSCHIG00000022851;ENSCHIG00000022874;ENSCHIG00000023502;ENSCHIG00000024391;ENSCHIG00000024549	K13296+K06633+K04440+K04441+K05459+K00922+K06631+K08045+K08042+K04345+K08041
Environmental Information Processing	Signal transduction	FoxO signaling pathway	16	131	0.122137	0.341955	0.694349	ko04068	ENSCHIG00000004184;ENSCHIG00000006042;ENSCHIG00000009525;ENSCHIG00000010215;ENSCHIG00000012374;ENSCHIG00000013425;ENSCHIG00000014529;ENSCHIG00000016843;ENSCHIG00000018583;ENSCHIG00000018863;ENSCHIG00000019728;ENSCHIG00000020547;ENSCHIG00000020828;ENSCHIG00000022211;ENSCHIG00000022851;ENSCHIG00000024702	K01596+K06625+K11431+K13302+K04440+K15010+K15010+K15464+K04441+K05459+K00922+K04361+K05072+K13303+K06631+K01596
Environmental Information Processing	Signal transduction	TNF signaling pathway	14	115	0.121739	0.361491	0.716565	ko04668	ENSCHIG00000011010;ENSCHIG00000011290;ENSCHIG00000011503;ENSCHIG00000012374;ENSCHIG00000015403;ENSCHIG00000016688;ENSCHIG00000016983;ENSCHIG00000018583;ENSCHIG00000019728;ENSCHIG00000024071;ENSCHIG00000024469;ENSCHIG00000024746;ENSCHIG00000025478;ENSCHIG00000026175	K07763+K04696+K04397+K04440+K12671+K12499+K01403+K04441+K00922+K05505+K04519+K10165+K09048+K05505
Human Diseases	Cancer: overview	Chemical carcinogenesis - receptor activation	24	198	0.121212	0.307313	0.647483	ko05207	ENSCHIG00000005457;ENSCHIG00000009100;ENSCHIG00000009359;ENSCHIG00000010819;ENSCHIG00000010963;ENSCHIG00000011455;ENSCHIG00000011683;ENSCHIG00000012382;ENSCHIG00000013282;ENSCHIG00000016710;ENSCHIG00000019728;ENSCHIG00000020547;ENSCHIG00000020738;ENSCHIG00000020938;ENSCHIG00000022874;ENSCHIG00000023502;ENSCHIG00000023586;ENSCHIG00000024391;ENSCHIG00000024549;ENSCHIG00000025478;ENSCHIG00000025579;…	K04849+K07424+K00799+K00799+K00799+K04358+K08551+K07410+K00799+K25041+K00922+K04361+K04358+K00699+K08045+K08042+K08539+K04345+K08041+K09048+K22368+K07408+K00799+K08526
Organismal Systems	Nervous system	Long-term depression	8	66	0.121212	0.423185	0.770993	ko04730	ENSCHIG00000009050;ENSCHIG00000014973;ENSCHIG00000018863;ENSCHIG00000019198;ENSCHIG00000019825;ENSCHIG00000023493;ENSCHIG00000026459;ENSCHIG00000026712	K16342+K19477+K05459+K16342+K04578+K05858+K16342+K16342
Metabolism	Carbohydrate metabolism	Fructose and mannose metabolism	4	33	0.121212	0.485509	0.829823	ko00051	ENSCHIG00000003090;ENSCHIG00000010678;ENSCHIG00000012393;ENSCHIG00000015845	K01623+K00844+K00844+K19030
Environmental Information Processing	Signal transduction	VEGF signaling pathway	7	58	0.12069	0.440176	0.784357	ko04370	ENSCHIG00000009050;ENSCHIG00000018583;ENSCHIG00000019198;ENSCHIG00000019728;ENSCHIG00000024845;ENSCHIG00000026459;ENSCHIG00000026712	K16342+K04441+K16342+K00922+K07860+K16342+K16342
Metabolism	Global and overview maps	Biosynthesis of amino acids	10	83	0.120482	0.409403	0.768432	ko01230	ENSCHIG00000000324;ENSCHIG00000003090;ENSCHIG00000006078;ENSCHIG00000007853;ENSCHIG00000009411;ENSCHIG00000017801;ENSCHIG00000018278;ENSCHIG00000022069;ENSCHIG00000022161;ENSCHIG00000023475	K00548+K01623+K12406+K11067+K00789+K01940+K01689+K01476+K01958+K00831
Cellular Processes	Transport and catabolism	Phagosome	22	183	0.120219	0.33196	0.690723	ko04145	ENSCHIG00000010165;ENSCHIG00000010637;ENSCHIG00000010779;ENSCHIG00000011350;ENSCHIG00000011562;ENSCHIG00000011623;ENSCHIG00000012445;ENSCHIG00000013577;ENSCHIG00000014286;ENSCHIG00000014983;ENSCHIG00000016627;ENSCHIG00000017272;ENSCHIG00000019421;ENSCHIG00000019472;ENSCHIG00000020875;ENSCHIG00000021899;ENSCHIG00000021903;ENSCHIG00000022824;ENSCHIG00000023775;ENSCHIG00000024483;ENSCHIG00000024628;…	K06856+K06560+K06751+K04391+K08763+K02153+K06856+K06856+K02147+K06856+K04659+K02148+K10062+K07374+K01365+K06751+K07898+K06856+K06560+K04659+K06856+K07375
Human Diseases	Cancer: overview	Pathways in cancer	67	562	0.119217	0.210049	0.513623	ko05200	ENSCHIG00000000426;ENSCHIG00000001342;ENSCHIG00000005194;ENSCHIG00000005207;ENSCHIG00000005295;ENSCHIG00000006042;ENSCHIG00000006056;ENSCHIG00000007326;ENSCHIG00000007513;ENSCHIG00000008229;ENSCHIG00000008305;ENSCHIG00000008551;ENSCHIG00000009359;ENSCHIG00000010463;ENSCHIG00000010819;ENSCHIG00000010919;ENSCHIG00000010963;ENSCHIG00000011086;ENSCHIG00000011373;ENSCHIG00000011455;ENSCHIG00000011470;…	K04541+K08738+K04363+K02183+K05637+K06625+K08738+K09389+K02375+K11126+K10055+K02842+K00799+K09348+K00799+K01357+K00799+K05637+K03898+K04358+K04166+K04397+K08551+K04440+K05055+K05074+K00799+K06240+K00444+K00572+K23790+K21635+K00312+K09095+K09592+K20995+K01403+K04294+K11101+K05459+K04273+K00922+K04361+K04358+K05072+K05126+K01384+K16859+K00714+K13241+K01357+K08045+K00445+K05095+K05858+K08042+K04345+…
Environmental Information Processing	Signal transduction	MAPK signaling pathway	34	286	0.118881	0.303866	0.647483	ko04010	ENSCHIG00000000483;ENSCHIG00000003071;ENSCHIG00000005194;ENSCHIG00000005457;ENSCHIG00000008392;ENSCHIG00000008697;ENSCHIG00000009050;ENSCHIG00000011350;ENSCHIG00000011455;ENSCHIG00000012374;ENSCHIG00000012922;ENSCHIG00000013024;ENSCHIG00000013367;ENSCHIG00000015662;ENSCHIG00000015847;ENSCHIG00000017471;ENSCHIG00000018583;ENSCHIG00000018863;ENSCHIG00000019080;ENSCHIG00000019198;ENSCHIG00000020547;…	K09784+K04409+K04363+K04849+K04854+K04459+K16342+K04391+K04358+K04440+K04459+K04386+K04865+K04422+K09782+K04723+K04441+K05459+K02583+K16342+K04361+K04358+K04852+K16859+K04458+K04360+K05462+K05095+K04345+K04519+K07860+K16342+K16342+K05090
Human Diseases	Infectious disease: viral	Human papillomavirus infection	42	354	0.118644	0.282977	0.620948	ko05165	ENSCHIG00000005295;ENSCHIG00000006042;ENSCHIG00000006565;ENSCHIG00000007513;ENSCHIG00000008229;ENSCHIG00000008551;ENSCHIG00000010779;ENSCHIG00000010919;ENSCHIG00000011086;ENSCHIG00000011623;ENSCHIG00000013633;ENSCHIG00000014286;ENSCHIG00000014378;ENSCHIG00000014443;ENSCHIG00000014632;ENSCHIG00000016095;ENSCHIG00000016159;ENSCHIG00000016344;ENSCHIG00000016627;ENSCHIG00000016952;ENSCHIG00000017272;…	K05637+K06625+K06252+K02375+K11126+K02842+K06751+K01357+K05637+K02153+K06240+K02147+K00444+K09087+K00572+K09087+K00312+K04354+K04659+K20995+K02148+K06238+K06591+K00922+K04361+K06236+K01384+K06093+K06751+K06252+K00714+K01357+K00445+K04345+K04659+K12075+K06587+K09048+K06236+K06247+K02354+K02432
Organismal Systems	Immune system	B cell receptor signaling pathway	9	76	0.118421	0.440086	0.784357	ko04662	ENSCHIG00000010165;ENSCHIG00000012445;ENSCHIG00000013577;ENSCHIG00000013630;ENSCHIG00000014983;ENSCHIG00000019728;ENSCHIG00000022824;ENSCHIG00000024628;ENSCHIG00000024845	K06856+K06856+K06856+K06506+K06856+K00922+K06856+K06856+K07860
Environmental Information Processing	Signal transduction	NF-kappa B signaling pathway	15	127	0.11811	0.399838	0.758557	ko04064	ENSCHIG00000010165;ENSCHIG00000011350;ENSCHIG00000012445;ENSCHIG00000013024;ENSCHIG00000013577;ENSCHIG00000014983;ENSCHIG00000019736;ENSCHIG00000021365;ENSCHIG00000022824;ENSCHIG00000024071;ENSCHIG00000024441;ENSCHIG00000024469;ENSCHIG00000024628;ENSCHIG00000025614;ENSCHIG00000026175	K06856+K04391+K06856+K04386+K06856+K06856+K05399+K10785+K06856+K05505+K05162+K04519+K06856+K05147+K05505
Organismal Systems	Endocrine system	Adipocytokine signaling pathway	8	68	0.117647	0.457285	0.797867	ko04920	ENSCHIG00000004184;ENSCHIG00000011290;ENSCHIG00000012374;ENSCHIG00000015991;ENSCHIG00000022508;ENSCHIG00000023226;ENSCHIG00000024702;ENSCHIG00000026695	K01596+K04696+K04440+K07202+K01897+K05062+K01596+K08526
Human Diseases	Substance dependence	Amphetamine addiction	8	68	0.117647	0.457285	0.797867	ko05031	ENSCHIG00000005207;ENSCHIG00000013689;ENSCHIG00000021410;ENSCHIG00000022874;ENSCHIG00000024391;ENSCHIG00000025478;ENSCHIG00000026891;ENSCHIG00000027251	K02183+K01593+K05036+K08045+K04345+K09048+K05214+K15494
Organismal Systems	Circulatory system	Adrenergic signaling in cardiomyocytes	18	154	0.116883	0.40079	0.758557	ko04261	ENSCHIG00000005207;ENSCHIG00000011470;ENSCHIG00000013367;ENSCHIG00000016344;ENSCHIG00000018164;ENSCHIG00000018453;ENSCHIG00000018583;ENSCHIG00000020204;ENSCHIG00000020498;ENSCHIG00000020793;ENSCHIG00000021001;ENSCHIG00000022874;ENSCHIG00000023493;ENSCHIG00000023502;ENSCHIG00000023627;ENSCHIG00000024391;ENSCHIG00000024549;ENSCHIG00000025478	K02183+K04166+K04865+K04354+K04839+K05853+K04441+K10373+K12044+K04926+K04135+K08045+K05858+K08042+K01540+K04345+K08041+K09048
Environmental Information Processing	Signal transduction	JAK-STAT signaling pathway	21	180	0.116667	0.390664	0.747843	ko04630	ENSCHIG00000005194;ENSCHIG00000006042;ENSCHIG00000009367;ENSCHIG00000010864;ENSCHIG00000011290;ENSCHIG00000012394;ENSCHIG00000012562;ENSCHIG00000013439;ENSCHIG00000013677;ENSCHIG00000014106;ENSCHIG00000014349;ENSCHIG00000016224;ENSCHIG00000018211;ENSCHIG00000018646;ENSCHIG00000019728;ENSCHIG00000020547;ENSCHIG00000020828;ENSCHIG00000023226;ENSCHIG00000023981;ENSCHIG00000025398;ENSCHIG00000026489	K04363+K06625+K05057+K05081+K04696+K05055+K05074+K00157+K00157+K05492+K05058+K05136+K05445+K05137+K00922+K04361+K05072+K05062+K05140+K05444+K05139
Human Diseases	Cardiovascular disease	Lipid and atherosclerosis	28	241	0.116183	0.372981	0.722246	ko05417	ENSCHIG00000001342;ENSCHIG00000004836;ENSCHIG00000005122;ENSCHIG00000005207;ENSCHIG00000006056;ENSCHIG00000006667;ENSCHIG00000011350;ENSCHIG00000011503;ENSCHIG00000011562;ENSCHIG00000011955;ENSCHIG00000012374;ENSCHIG00000013862;ENSCHIG00000016688;ENSCHIG00000016983;ENSCHIG00000017342;ENSCHIG00000018583;ENSCHIG00000019728;ENSCHIG00000019736;ENSCHIG00000021348;ENSCHIG00000022311;ENSCHIG00000023493;…	K08738+K10950+K04722+K02183+K08738+K04722+K04391+K04397+K08763+K04396+K04440+K19722+K12499+K01403+K09364+K04441+K00922+K05399+K08757+K04722+K05858+K05505+K04519+K06496+K07408+K08738+K05505+K08526
Human Diseases	Cardiovascular disease	Hypertrophic cardiomyopathy	11	95	0.115789	0.453583	0.797867	ko05410	ENSCHIG00000005295;ENSCHIG00000008416;ENSCHIG00000011086;ENSCHIG00000013367;ENSCHIG00000018453;ENSCHIG00000018472;ENSCHIG00000018863;ENSCHIG00000019429;ENSCHIG00000020204;ENSCHIG00000020498;ENSCHIG00000025296	K05637+K07610+K05637+K04865+K05853+K12567+K05459+K06591+K10373+K12044+K06587
Human Diseases	Endocrine and metabolic disease	Alcoholic liver disease	17	147	0.115646	0.423471	0.770993	ko04936	ENSCHIG00000011041;ENSCHIG00000011350;ENSCHIG00000012239;ENSCHIG00000012374;ENSCHIG00000014396;ENSCHIG00000015989;ENSCHIG00000015991;ENSCHIG00000018583;ENSCHIG00000019452;ENSCHIG00000019736;ENSCHIG00000020284;ENSCHIG00000022239;ENSCHIG00000024071;ENSCHIG00000024279;ENSCHIG00000024469;ENSCHIG00000025317;ENSCHIG00000026175	K03994+K04391+K13980+K04440+K01332+K13951+K07202+K04441+K08750+K05399+K13952+K05489+K05505+K13952+K04519+K13980+K05505
Human Diseases	Cancer: specific types	Small cell lung cancer	12	104	0.115385	0.452348	0.797867	ko05222	ENSCHIG00000001342;ENSCHIG00000005295;ENSCHIG00000006042;ENSCHIG00000006056;ENSCHIG00000007326;ENSCHIG00000011086;ENSCHIG00000013633;ENSCHIG00000019728;ENSCHIG00000022769;ENSCHIG00000025745;ENSCHIG00000025853;ENSCHIG00000026695	K08738+K05637+K06625+K08738+K09389+K05637+K06240+K00922+K13241+K06247+K08738+K08526
Metabolism	Carbohydrate metabolism	Amino sugar and nucleotide sugar metabolism	6	52	0.115385	0.498746	0.842145	ko00520	ENSCHIG00000003087;ENSCHIG00000003246;ENSCHIG00000010678;ENSCHIG00000012393;ENSCHIG00000021854;ENSCHIG00000026618	K05304+K21749+K00844+K00844+K00820+K12409
Organismal Systems	Endocrine system	Renin-angiotensin system	3	26	0.115385	0.544893	0.873394	ko04614	ENSCHIG00000008487;ENSCHIG00000011470;ENSCHIG00000020658	K08392+K04166+K11141
Human Diseases	Infectious disease: bacterial	Yersinia infection	20	174	0.114943	0.421943	0.770993	ko05135	ENSCHIG00000010165;ENSCHIG00000011784;ENSCHIG00000012374;ENSCHIG00000012445;ENSCHIG00000013577;ENSCHIG00000013942;ENSCHIG00000014983;ENSCHIG00000015013;ENSCHIG00000017026;ENSCHIG00000017258;ENSCHIG00000018583;ENSCHIG00000019728;ENSCHIG00000020344;ENSCHIG00000021365;ENSCHIG00000021584;ENSCHIG00000022824;ENSCHIG00000024469;ENSCHIG00000024628;ENSCHIG00000024845;ENSCHIG00000026907	K06856+K23471+K04440+K06856+K06856+K21072+K06856+K00889+K19475+K05627+K04441+K00922+K06459+K10785+K12803+K06856+K04519+K06856+K07860+K06458
Organismal Systems	Environmental adaptation	Circadian rhythm	4	35	0.114286	0.533252	0.858843	ko04710	ENSCHIG00000014557;ENSCHIG00000022335;ENSCHIG00000024108;ENSCHIG00000025775	K03729+K21945+K03730+K08532
Environmental Information Processing	Signal transduction	Sphingolipid signaling pathway	14	123	0.113821	0.462565	0.798759	ko04071	ENSCHIG00000008361;ENSCHIG00000011373;ENSCHIG00000011885;ENSCHIG00000012374;ENSCHIG00000013199;ENSCHIG00000016344;ENSCHIG00000017842;ENSCHIG00000018583;ENSCHIG00000019728;ENSCHIG00000021209;ENSCHIG00000023493;ENSCHIG00000024845;ENSCHIG00000025546;ENSCHIG00000025999	K01441+K03898+K08089+K04440+K04295+K04354+K04714+K04441+K00922+K04710+K05858+K07860+K24622+K18050
Human Diseases	Infectious disease: parasitic	Leishmaniasis	10	88	0.113636	0.484851	0.829823	ko05140	ENSCHIG00000010165;ENSCHIG00000012445;ENSCHIG00000013577;ENSCHIG00000014983;ENSCHIG00000016589;ENSCHIG00000018583;ENSCHIG00000022769;ENSCHIG00000022824;ENSCHIG00000024469;ENSCHIG00000024628	K06856+K06856+K06856+K06856+K03231+K04441+K13241+K06856+K04519+K06856
Metabolism	Amino acid metabolism	Alanine, aspartate and glutamate metabolism	5	44	0.113636	0.524716	0.85769	ko00250	ENSCHIG00000001947;ENSCHIG00000015404;ENSCHIG00000017801;ENSCHIG00000021854;ENSCHIG00000022496	K00272+K18311+K01940+K00820+K00830
Human Diseases	Cancer: specific types	Melanoma	8	71	0.112676	0.507635	0.846058	ko05218	ENSCHIG00000005194;ENSCHIG00000006042;ENSCHIG00000007326;ENSCHIG00000011455;ENSCHIG00000018863;ENSCHIG00000019728;ENSCHIG00000020547;ENSCHIG00000020738	K04363+K06625+K09389+K04358+K05459+K00922+K04361+K04358
Organismal Systems	Immune system	Platelet activation	14	126	0.111111	0.500259	0.842145	ko04611	ENSCHIG00000009050;ENSCHIG00000014973;ENSCHIG00000018583;ENSCHIG00000019198;ENSCHIG00000019728;ENSCHIG00000021319;ENSCHIG00000022874;ENSCHIG00000023493;ENSCHIG00000023502;ENSCHIG00000024391;ENSCHIG00000024549;ENSCHIG00000025647;ENSCHIG00000026459;ENSCHIG00000026712	K16342+K19477+K04441+K16342+K00922+K06236+K08045+K05858+K08042+K04345+K08041+K06236+K16342+K16342
Organismal Systems	Endocrine system	Prolactin signaling pathway	9	81	0.111111	0.518999	0.856475	ko04917	ENSCHIG00000010864;ENSCHIG00000011290;ENSCHIG00000011683;ENSCHIG00000012374;ENSCHIG00000013813;ENSCHIG00000014082;ENSCHIG00000018583;ENSCHIG00000019728;ENSCHIG00000025614	K05081+K04696+K08551+K04440+K17449+K17101+K04441+K00922+K05147
Organismal Systems	Aging	Longevity regulating pathway - multiple species	7	63	0.111111	0.529976	0.85769	ko04213	ENSCHIG00000013879;ENSCHIG00000018863;ENSCHIG00000019728;ENSCHIG00000022874;ENSCHIG00000023502;ENSCHIG00000024391;ENSCHIG00000024549	K08035+K05459+K00922+K08045+K08042+K04345+K08041
Organismal Systems	Immune system	Th17 cell differentiation	14	127	0.110236	0.512701	0.850271	ko04659	ENSCHIG00000008358;ENSCHIG00000010751;ENSCHIG00000012374;ENSCHIG00000012394;ENSCHIG00000013024;ENSCHIG00000017471;ENSCHIG00000018211;ENSCHIG00000018583;ENSCHIG00000021365;ENSCHIG00000022239;ENSCHIG00000024469;ENSCHIG00000025775;ENSCHIG00000026695;ENSCHIG00000027084	K05494+K22629+K04440+K05055+K04386+K04723+K05445+K04441+K10785+K05489+K04519+K08532+K08526+K09445
Cellular Processes	Cellular community - eukaryotes	Tight junction	20	182	0.10989	0.505997	0.846058	ko04530	ENSCHIG00000004105;ENSCHIG00000004293;ENSCHIG00000007539;ENSCHIG00000008873;ENSCHIG00000011600;ENSCHIG00000012374;ENSCHIG00000012395;ENSCHIG00000016344;ENSCHIG00000017768;ENSCHIG00000017920;ENSCHIG00000019472;ENSCHIG00000020420;ENSCHIG00000021178;ENSCHIG00000021260;ENSCHIG00000021859;ENSCHIG00000024391;ENSCHIG00000024691;ENSCHIG00000024747;ENSCHIG00000025376;ENSCHIG00000025999	K06087+K06087+K06104+K06087+K06448+K04440+K21110+K04354+K05031+K05731+K07374+K06087+K06448+K06087+K06093+K04345+K12075+K06448+K06087+K18050
Metabolism	Global and overview maps	Carbon metabolism	14	128	0.109375	0.525062	0.85769	ko01200	ENSCHIG00000000476;ENSCHIG00000001144;ENSCHIG00000003090;ENSCHIG00000006078;ENSCHIG00000008125;ENSCHIG00000010678;ENSCHIG00000012393;ENSCHIG00000018278;ENSCHIG00000021744;ENSCHIG00000022161;ENSCHIG00000022496;ENSCHIG00000022836;ENSCHIG00000023475;ENSCHIG00000023954	K07511+K00027+K01623+K12406+K11529+K00844+K00844+K01689+K01895+K01958+K00830+K00029+K00831+K01895
Organismal Systems	Digestive system	Cholesterol metabolism	6	55	0.109091	0.555534	0.879724	ko04979	ENSCHIG00000015994;ENSCHIG00000021164;ENSCHIG00000021348;ENSCHIG00000021424;ENSCHIG00000023643;ENSCHIG00000025165	K22284+K08761+K08757+K00637+K08767+K00637
Metabolism	Glycan biosynthesis and metabolism	Other types of O-glycan biosynthesis	5	46	0.108696	0.565652	0.88964	ko00514	ENSCHIG00000001864;ENSCHIG00000013738;ENSCHIG00000017266;ENSCHIG00000024307;ENSCHIG00000025267	K00710+K00779+K00710+K00710+K00710
Organismal Systems	Endocrine system	Insulin signaling pathway	15	140	0.107143	0.556721	0.879724	ko04910	ENSCHIG00000004184;ENSCHIG00000005207;ENSCHIG00000006078;ENSCHIG00000006321;ENSCHIG00000006614;ENSCHIG00000009677;ENSCHIG00000010678;ENSCHIG00000011290;ENSCHIG00000012374;ENSCHIG00000012393;ENSCHIG00000013813;ENSCHIG00000015991;ENSCHIG00000019728;ENSCHIG00000024391;ENSCHIG00000024702	K01596+K02183+K12406+K03259+K07189+K13296+K00844+K04696+K04440+K00844+K17449+K07202+K00922+K04345+K01596
Environmental Information Processing	Signal transduction	AMPK signaling pathway	13	123	0.105691	0.579139	0.906595	ko04152	ENSCHIG00000004184;ENSCHIG00000015673;ENSCHIG00000015845;ENSCHIG00000015991;ENSCHIG00000016344;ENSCHIG00000017334;ENSCHIG00000017768;ENSCHIG00000018863;ENSCHIG00000019728;ENSCHIG00000021001;ENSCHIG00000023226;ENSCHIG00000024702;ENSCHIG00000025478	K01596+K17532+K19030+K07202+K04354+K07292+K05031+K05459+K00922+K04135+K05062+K01596+K09048
Human Diseases	Cancer: specific types	Colorectal cancer	10	95	0.105263	0.585966	0.911563	ko05210	ENSCHIG00000000483;ENSCHIG00000001342;ENSCHIG00000006042;ENSCHIG00000006056;ENSCHIG00000012374;ENSCHIG00000015847;ENSCHIG00000019728;ENSCHIG00000020547;ENSCHIG00000024845;ENSCHIG00000025853	K09784+K08738+K06625+K08738+K04440+K09782+K00922+K04361+K07860+K08738
Human Diseases	Cancer: specific types	Glioma	8	76	0.105263	0.587754	0.911563	ko05214	ENSCHIG00000005194;ENSCHIG00000005207;ENSCHIG00000006042;ENSCHIG00000007326;ENSCHIG00000013813;ENSCHIG00000018863;ENSCHIG00000019728;ENSCHIG00000020547	K04363+K02183+K06625+K09389+K17449+K05459+K00922+K04361
Environmental Information Processing	Signal transduction	cGMP-PKG signaling pathway	19	181	0.104972	0.591895	0.913755	ko04022	ENSCHIG00000000241;ENSCHIG00000002663;ENSCHIG00000005207;ENSCHIG00000009677;ENSCHIG00000011373;ENSCHIG00000011470;ENSCHIG00000013825;ENSCHIG00000014973;ENSCHIG00000018453;ENSCHIG00000021001;ENSCHIG00000022874;ENSCHIG00000023493;ENSCHIG00000023502;ENSCHIG00000023627;ENSCHIG00000024549;ENSCHIG00000025127;ENSCHIG00000025478;ENSCHIG00000025977;ENSCHIG00000025999	K09565+K04138+K02183+K13296+K03898+K04166+K04948+K19477+K05853+K04135+K08045+K05858+K08042+K01540+K08041+K04936+K09048+K19021+K18050
Human Diseases	Infectious disease: bacterial	Tuberculosis	21	201	0.104478	0.602148	0.925319	ko05152	ENSCHIG00000001342;ENSCHIG00000005207;ENSCHIG00000006056;ENSCHIG00000010165;ENSCHIG00000010637;ENSCHIG00000011350;ENSCHIG00000012374;ENSCHIG00000012445;ENSCHIG00000013565;ENSCHIG00000013577;ENSCHIG00000014983;ENSCHIG00000018583;ENSCHIG00000019736;ENSCHIG00000022769;ENSCHIG00000022824;ENSCHIG00000023586;ENSCHIG00000023775;ENSCHIG00000024469;ENSCHIG00000024628;ENSCHIG00000024746;ENSCHIG00000025853	K08738+K02183+K08738+K06856+K06560+K04391+K04440+K06856+K10059+K06856+K06856+K04441+K05399+K13241+K06856+K08539+K06560+K04519+K06856+K10165+K08738
Human Diseases	Substance dependence	Morphine addiction	11	106	0.103774	0.605131	0.925656	ko05032	ENSCHIG00000000426;ENSCHIG00000005457;ENSCHIG00000009677;ENSCHIG00000013352;ENSCHIG00000022874;ENSCHIG00000023502;ENSCHIG00000023746;ENSCHIG00000024391;ENSCHIG00000024549;ENSCHIG00000024967;ENSCHIG00000025977	K04541+K04849+K13296+K05190+K08045+K08042+K05175+K04345+K08041+K04615+K19021
Organismal Systems	Nervous system	GABAergic synapse	10	97	0.103093	0.613202	0.93374	ko04727	ENSCHIG00000000426;ENSCHIG00000005457;ENSCHIG00000013352;ENSCHIG00000022874;ENSCHIG00000023089;ENSCHIG00000023502;ENSCHIG00000023746;ENSCHIG00000024391;ENSCHIG00000024549;ENSCHIG00000024967	K04541+K04849+K05190+K08045+K13576+K08042+K05175+K04345+K08041+K04615
Metabolism	Carbohydrate metabolism	Glyoxylate and dicarboxylate metabolism	4	39	0.102564	0.621483	0.942067	ko00630	ENSCHIG00000008125;ENSCHIG00000021744;ENSCHIG00000022496;ENSCHIG00000023954	K11529+K01895+K00830+K01895
Organismal Systems	Immune system	Antigen processing and presentation	12	118	0.101695	0.634527	0.95555	ko04612	ENSCHIG00000009324;ENSCHIG00000009906;ENSCHIG00000010779;ENSCHIG00000014652;ENSCHIG00000015450;ENSCHIG00000017270;ENSCHIG00000020344;ENSCHIG00000020875;ENSCHIG00000021365;ENSCHIG00000021899;ENSCHIG00000025463;ENSCHIG00000026907	K06516+K06541+K06751+K06516+K06516+K07980+K06459+K01365+K10785+K06751+K07980+K06458
Organismal Systems	Aging	Longevity regulating pathway	9	89	0.101124	0.636082	0.95555	ko04211	ENSCHIG00000006321;ENSCHIG00000015991;ENSCHIG00000018863;ENSCHIG00000019728;ENSCHIG00000022874;ENSCHIG00000023502;ENSCHIG00000024391;ENSCHIG00000024549;ENSCHIG00000025478	K03259+K07202+K05459+K00922+K08045+K08042+K04345+K08041+K09048
Human Diseases	Drug resistance: antineoplastic	EGFR tyrosine kinase inhibitor resistance	9	90	0.1	0.649593	0.968381	ko01521	ENSCHIG00000002290;ENSCHIG00000005194;ENSCHIG00000006321;ENSCHIG00000011115;ENSCHIG00000012394;ENSCHIG00000013813;ENSCHIG00000018863;ENSCHIG00000019728;ENSCHIG00000020547	K05455+K04363+K03259+K05456+K05055+K17449+K05459+K00922+K04361
Metabolism	Amino acid metabolism	Phenylalanine metabolism	2	20	0.1	0.653296	0.968381	ko00360	ENSCHIG00000013689;ENSCHIG00000018390	K01593+K00815
Metabolism	Metabolism of cofactors and vitamins	One carbon pool by folate	2	20	0.1	0.653296	0.968381	ko00670	ENSCHIG00000000324;ENSCHIG00000025785	K00548+K25004
Organismal Systems	Immune system	NOD-like receptor signaling pathway	19	191	0.0994764	0.686804	0.991721	ko04621	ENSCHIG00000002045;ENSCHIG00000010381;ENSCHIG00000010774;ENSCHIG00000012142;ENSCHIG00000012374;ENSCHIG00000016414;ENSCHIG00000016688;ENSCHIG00000017728;ENSCHIG00000018583;ENSCHIG00000019284;ENSCHIG00000021584;ENSCHIG00000021593;ENSCHIG00000022451;ENSCHIG00000023493;ENSCHIG00000023910;ENSCHIG00000024071;ENSCHIG00000024469;ENSCHIG00000024746;ENSCHIG00000026175	K21100+K12654+K20917+K20899+K04440+K20899+K12499+K12653+K04441+K08727+K12803+K21100+K05220+K05858+K20897+K05505+K04519+K10165+K05505
Organismal Systems	Nervous system	Dopaminergic synapse	14	142	0.0985915	0.684585	0.991721	ko04728	ENSCHIG00000000426;ENSCHIG00000005207;ENSCHIG00000005457;ENSCHIG00000012374;ENSCHIG00000013689;ENSCHIG00000015115;ENSCHIG00000016344;ENSCHIG00000018583;ENSCHIG00000021410;ENSCHIG00000022874;ENSCHIG00000023493;ENSCHIG00000024391;ENSCHIG00000025478;ENSCHIG00000027251	K04541+K02183+K04849+K04440+K01593+K10396+K04354+K04441+K05036+K08045+K05858+K04345+K09048+K15494
Human Diseases	Infectious disease: viral	Human cytomegalovirus infection	26	265	0.0981132	0.732708	1	ko05163	ENSCHIG00000000426;ENSCHIG00000001342;ENSCHIG00000005194;ENSCHIG00000005207;ENSCHIG00000006042;ENSCHIG00000006056;ENSCHIG00000007326;ENSCHIG00000010381;ENSCHIG00000010779;ENSCHIG00000012394;ENSCHIG00000013024;ENSCHIG00000016688;ENSCHIG00000018583;ENSCHIG00000019728;ENSCHIG00000020547;ENSCHIG00000020838;ENSCHIG00000021899;ENSCHIG00000022874;ENSCHIG00000023493;ENSCHIG00000023502;ENSCHIG00000024391;…	K04541+K08738+K04363+K02183+K06625+K08738+K09389+K12654+K06751+K05055+K04386+K12499+K04441+K00922+K04361+K05050+K06751+K08045+K05858+K08042+K04345+K04519+K08041+K07860+K09048+K08738
Environmental Information Processing	Signal transduction	TGF-beta signaling pathway	10	102	0.0980392	0.67711	0.990297	ko04350	ENSCHIG00000010429;ENSCHIG00000010484;ENSCHIG00000010643;ENSCHIG00000010703;ENSCHIG00000013118;ENSCHIG00000017761;ENSCHIG00000021045;ENSCHIG00000022421;ENSCHIG00000024398;ENSCHIG00000026218	K04663+K04686+K23318+K06766+K13568+K13578+K06825+K06847+K22687+K23106
Organismal Systems	Immune system	C-type lectin receptor signaling pathway	10	102	0.0980392	0.67711	0.990297	ko04625	ENSCHIG00000003071;ENSCHIG00000005207;ENSCHIG00000007701;ENSCHIG00000012374;ENSCHIG00000013565;ENSCHIG00000014106;ENSCHIG00000018583;ENSCHIG00000019728;ENSCHIG00000022701;ENSCHIG00000024469	K04409+K02183+K17514+K04440+K10059+K05492+K04441+K00922+K21095+K04519
Environmental Information Processing	Signal transduction	Rap1 signaling pathway	23	235	0.0978723	0.72757	1	ko04015	ENSCHIG00000005194;ENSCHIG00000005207;ENSCHIG00000011455;ENSCHIG00000017316;ENSCHIG00000017920;ENSCHIG00000018583;ENSCHIG00000018863;ENSCHIG00000019080;ENSCHIG00000019728;ENSCHIG00000020547;ENSCHIG00000020738;ENSCHIG00000021365;ENSCHIG00000021859;ENSCHIG00000021989;ENSCHIG00000022874;ENSCHIG00000023314;ENSCHIG00000023444;ENSCHIG00000023493;ENSCHIG00000023502;ENSCHIG00000024549;ENSCHIG00000024845;…	K04363+K02183+K04358+K04294+K05731+K04441+K05459+K02583+K00922+K04361+K04358+K10785+K06093+K16859+K08045+K05462+K05095+K05858+K08042+K08041+K07860+K05090+K17699
Organismal Systems	Environmental adaptation	Circadian entrainment	11	113	0.0973451	0.690194	0.992339	ko04713	ENSCHIG00000000426;ENSCHIG00000005207;ENSCHIG00000008392;ENSCHIG00000014253;ENSCHIG00000014973;ENSCHIG00000022335;ENSCHIG00000022874;ENSCHIG00000023493;ENSCHIG00000023502;ENSCHIG00000024391;ENSCHIG00000024549	K04541+K02183+K04854+K16513+K19477+K21945+K08045+K05858+K08042+K04345+K08041
Human Diseases	Cancer: specific types	Non-small cell lung cancer	7	72	0.0972222	0.674323	0.990297	ko05223	ENSCHIG00000006042;ENSCHIG00000007326;ENSCHIG00000015115;ENSCHIG00000019728;ENSCHIG00000020547;ENSCHIG00000021480;ENSCHIG00000026695	K06625+K09389+K10396+K00922+K04361+K05126+K08526
Cellular Processes	Cell motility	Regulation of actin cytoskeleton	22	227	0.0969163	0.740957	1	ko04810	ENSCHIG00000003071;ENSCHIG00000005194;ENSCHIG00000011236;ENSCHIG00000011373;ENSCHIG00000011455;ENSCHIG00000012488;ENSCHIG00000012973;ENSCHIG00000014472;ENSCHIG00000015013;ENSCHIG00000017258;ENSCHIG00000017920;ENSCHIG00000018019;ENSCHIG00000018690;ENSCHIG00000019429;ENSCHIG00000019728;ENSCHIG00000020547;ENSCHIG00000020738;ENSCHIG00000021400;ENSCHIG00000023444;ENSCHIG00000024845;ENSCHIG00000025296;…	K04409+K04363+K04131+K03898+K04358+K04129+K05769+K05768+K00889+K05627+K05731+K05744+K05769+K06591+K00922+K04361+K04358+K06594+K05095+K07860+K06587+K05769
Metabolism	Glycan biosynthesis and metabolism	Other glycan degradation	2	21	0.0952381	0.679905	0.990297	ko00511	ENSCHIG00000024666;ENSCHIG00000025213	K12357+K17108
Organismal Systems	Endocrine system	Oxytocin signaling pathway	15	159	0.0943396	0.751322	1	ko04921	ENSCHIG00000003874;ENSCHIG00000005207;ENSCHIG00000006042;ENSCHIG00000009050;ENSCHIG00000010300;ENSCHIG00000013367;ENSCHIG00000019198;ENSCHIG00000020547;ENSCHIG00000022874;ENSCHIG00000023493;ENSCHIG00000023502;ENSCHIG00000024391;ENSCHIG00000024549;ENSCHIG00000026459;ENSCHIG00000026712	K01242+K02183+K06625+K16342+K05005+K04865+K16342+K04361+K08045+K05858+K08042+K04345+K08041+K16342+K16342
Organismal Systems	Development and regeneration	Osteoclast differentiation	11	117	0.0940171	0.733469	1	ko04380	ENSCHIG00000011290;ENSCHIG00000012374;ENSCHIG00000012593;ENSCHIG00000013024;ENSCHIG00000018583;ENSCHIG00000019728;ENSCHIG00000020602;ENSCHIG00000022890;ENSCHIG00000024469;ENSCHIG00000025614;ENSCHIG00000026731	K04696+K04440+K06551+K04386+K04441+K00922+K14377+K04502+K04519+K05147+K05090
Environmental Information Processing	Signal transduction	Phosphatidylinositol signaling system	9	96	0.09375	0.724384	1	ko04070	ENSCHIG00000005207;ENSCHIG00000008640;ENSCHIG00000012389;ENSCHIG00000015013;ENSCHIG00000019158;ENSCHIG00000019728;ENSCHIG00000022749;ENSCHIG00000023493;ENSCHIG00000025100	K02183+K10572+K00911+K00889+K00923+K00922+K01092+K05858+K05857
Organismal Systems	Immune system	Neutrophil extracellular trap formation	19	203	0.0935961	0.782419	1	ko04613	ENSCHIG00000000241;ENSCHIG00000009774;ENSCHIG00000010165;ENSCHIG00000010417;ENSCHIG00000010774;ENSCHIG00000011041;ENSCHIG00000011449;ENSCHIG00000012445;ENSCHIG00000013209;ENSCHIG00000013577;ENSCHIG00000013862;ENSCHIG00000014983;ENSCHIG00000018583;ENSCHIG00000019728;ENSCHIG00000022824;ENSCHIG00000023493;ENSCHIG00000024573;ENSCHIG00000024628;ENSCHIG00000024845	K09565+K11254+K06856+K11418+K20917+K03994+K11251+K06856+K11252+K06856+K19722+K06856+K04441+K00922+K06856+K05858+K06496+K06856+K07860
Human Diseases	Infectious disease: viral	Hepatitis C	16	174	0.091954	0.790784	1	ko05160	ENSCHIG00000001342;ENSCHIG00000004105;ENSCHIG00000004293;ENSCHIG00000006042;ENSCHIG00000006056;ENSCHIG00000007326;ENSCHIG00000008873;ENSCHIG00000011290;ENSCHIG00000015403;ENSCHIG00000016344;ENSCHIG00000019728;ENSCHIG00000020420;ENSCHIG00000020547;ENSCHIG00000021260;ENSCHIG00000025376;ENSCHIG00000025853	K08738+K06087+K06087+K06625+K08738+K09389+K06087+K04696+K12671+K04354+K00922+K06087+K04361+K06087+K06087+K08738
Metabolism	Metabolism of cofactors and vitamins	Ubiquinone and other terpenoid-quinone biosynthesis	1	11	0.0909091	0.716383	1	ko00130	ENSCHIG00000018390	K00815
Cellular Processes	Cellular community - eukaryotes	Adherens junction	7	77	0.0909091	0.741283	1	ko04520	ENSCHIG00000017258;ENSCHIG00000019162;ENSCHIG00000020547;ENSCHIG00000024410;ENSCHIG00000024845;ENSCHIG00000025508;ENSCHIG00000026297	K05627+K06592+K04361+K05706+K07860+K06593+K06081
Human Diseases	Infectious disease: parasitic	Toxoplasmosis	11	121	0.0909091	0.772577	1	ko05145	ENSCHIG00000000241;ENSCHIG00000001342;ENSCHIG00000005295;ENSCHIG00000006056;ENSCHIG00000011086;ENSCHIG00000012374;ENSCHIG00000013633;ENSCHIG00000018583;ENSCHIG00000022769;ENSCHIG00000025745;ENSCHIG00000025853	K09565+K08738+K05637+K08738+K05637+K04440+K06240+K04441+K13241+K06247+K08738
Organismal Systems	Immune system	Cytosolic DNA-sensing pathway	6	67	0.0895522	0.746082	1	ko04623	ENSCHIG00000006747;ENSCHIG00000010381;ENSCHIG00000015403;ENSCHIG00000016688;ENSCHIG00000020304;ENSCHIG00000024469	K12965+K12654+K12671+K12499+K12967+K04519
Human Diseases	Infectious disease: parasitic	Chagas disease	12	135	0.0888889	0.804688	1	ko05142	ENSCHIG00000011373;ENSCHIG00000012374;ENSCHIG00000016344;ENSCHIG00000016688;ENSCHIG00000018583;ENSCHIG00000019728;ENSCHIG00000020858;ENSCHIG00000021365;ENSCHIG00000022769;ENSCHIG00000023493;ENSCHIG00000024469;ENSCHIG00000024549	K03898+K04440+K04354+K12499+K04441+K00922+K03982+K10785+K13241+K05858+K04519+K08041
Metabolism	Carbohydrate metabolism	Citrate cycle (TCA cycle)	3	34	0.0882353	0.727722	1	ko00020	ENSCHIG00000004184;ENSCHIG00000022161;ENSCHIG00000024702	K01596+K01958+K01596
Organismal Systems	Immune system	Leukocyte transendothelial migration	10	114	0.0877193	0.802354	1	ko04670	ENSCHIG00000004105;ENSCHIG00000004293;ENSCHIG00000008873;ENSCHIG00000016983;ENSCHIG00000018583;ENSCHIG00000019728;ENSCHIG00000020420;ENSCHIG00000021260;ENSCHIG00000024845;ENSCHIG00000025376	K06087+K06087+K06087+K01403+K04441+K00922+K06087+K06087+K07860+K06087
Organismal Systems	Nervous system	Retrograde endocannabinoid signaling	15	171	0.0877193	0.840148	1	ko04723	ENSCHIG00000000426;ENSCHIG00000005457;ENSCHIG00000011011;ENSCHIG00000012374;ENSCHIG00000013352;ENSCHIG00000015813;ENSCHIG00000016894;ENSCHIG00000018583;ENSCHIG00000020106;ENSCHIG00000022874;ENSCHIG00000023493;ENSCHIG00000023502;ENSCHIG00000023746;ENSCHIG00000024391;ENSCHIG00000024549	K04541+K04849+K15291+K04440+K05190+K04604+K12302+K04441+K13806+K08045+K05858+K08042+K05175+K04345+K08041
Environmental Information Processing	Signal transduction	Apelin signaling pathway	14	160	0.0875	0.836002	1	ko04371	ENSCHIG00000000426;ENSCHIG00000005207;ENSCHIG00000009677;ENSCHIG00000011470;ENSCHIG00000015991;ENSCHIG00000016952;ENSCHIG00000020858;ENSCHIG00000022769;ENSCHIG00000022874;ENSCHIG00000023493;ENSCHIG00000023502;ENSCHIG00000024391;ENSCHIG00000024549;ENSCHIG00000025999	K04541+K02183+K13296+K04166+K07202+K20995+K03982+K13241+K08045+K05858+K08042+K04345+K08041+K18050
Organismal Systems	Excretory system	Endocrine and other factor-regulated calcium reabsorption	5	58	0.0862069	0.76665	1	ko04961	ENSCHIG00000021026;ENSCHIG00000023493;ENSCHIG00000023586;ENSCHIG00000023627;ENSCHIG00000024391	K14757+K05858+K08539+K01540+K04345
Human Diseases	Infectious disease: viral	Influenza A	16	186	0.0860215	0.866756	1	ko05164	ENSCHIG00000001342;ENSCHIG00000005122;ENSCHIG00000006056;ENSCHIG00000006667;ENSCHIG00000011290;ENSCHIG00000012711;ENSCHIG00000015403;ENSCHIG00000016197;ENSCHIG00000016688;ENSCHIG00000017728;ENSCHIG00000019728;ENSCHIG00000020304;ENSCHIG00000022311;ENSCHIG00000024469;ENSCHIG00000024477;ENSCHIG00000025853	K08738+K04722+K08738+K04722+K04696+K09635+K12671+K09641+K12499+K12653+K00922+K12967+K04722+K04519+K09633+K08738
Metabolism	Metabolism of other amino acids	beta-Alanine metabolism	3	35	0.0857143	0.745954	1	ko00410	ENSCHIG00000000476;ENSCHIG00000015633;ENSCHIG00000025287	K07511+K18966+K01464
Organismal Systems	Immune system	Toll-like receptor signaling pathway	9	105	0.0857143	0.815195	1	ko04620	ENSCHIG00000011350;ENSCHIG00000012374;ENSCHIG00000015403;ENSCHIG00000016688;ENSCHIG00000017407;ENSCHIG00000018583;ENSCHIG00000019728;ENSCHIG00000019736;ENSCHIG00000024469	K04391+K04440+K12671+K12499+K12672+K04441+K00922+K05399+K04519
Human Diseases	Cancer: overview	Chemical carcinogenesis - reactive oxygen species	25	297	0.0841751	0.930501	1	ko05208	ENSCHIG00000000241;ENSCHIG00000004827;ENSCHIG00000009359;ENSCHIG00000010819;ENSCHIG00000010963;ENSCHIG00000011337;ENSCHIG00000011667;ENSCHIG00000011701;ENSCHIG00000011959;ENSCHIG00000012276;ENSCHIG00000012374;ENSCHIG00000012382;ENSCHIG00000013258;ENSCHIG00000013282;ENSCHIG00000015228;ENSCHIG00000015607;ENSCHIG00000016878;ENSCHIG00000018583;ENSCHIG00000019728;ENSCHIG00000020547;ENSCHIG00000021527;…	K09565+K00079+K00799+K00799+K00799+K04119+K00079+K04119+K14706+K04119+K04440+K07410+K04119+K00799+K04119+K04119+K04119+K04441+K00922+K04361+K04119+K22368+K07408+K00799+K04119
Human Diseases	Neurodegenerative disease	Spinocerebellar ataxia	14	167	0.0838323	0.877277	1	ko05017	ENSCHIG00000000241;ENSCHIG00000001342;ENSCHIG00000006056;ENSCHIG00000009624;ENSCHIG00000012374;ENSCHIG00000018453;ENSCHIG00000019728;ENSCHIG00000023493;ENSCHIG00000024663;ENSCHIG00000025768;ENSCHIG00000025775;ENSCHIG00000025819;ENSCHIG00000025853;ENSCHIG00000026891	K09565+K08738+K08738+K02738+K04440+K05853+K00922+K05858+K20054+K23932+K08532+K04966+K08738+K05214
Metabolism	Metabolism of terpenoids and polyketides	Terpenoid backbone biosynthesis	2	24	0.0833333	0.749802	1	ko00900	ENSCHIG00000024473;ENSCHIG00000025654	K13273+K01641
Human Diseases	Infectious disease: parasitic	Malaria	6	72	0.0833333	0.805415	1	ko05144	ENSCHIG00000011749;ENSCHIG00000016627;ENSCHIG00000021365;ENSCHIG00000024469;ENSCHIG00000024483;ENSCHIG00000024573	K06728+K04659+K10785+K04519+K04659+K06496
Organismal Systems	Endocrine system	Thyroid hormone signaling pathway	10	121	0.0826446	0.85659	1	ko04919	ENSCHIG00000016952;ENSCHIG00000018453;ENSCHIG00000019728;ENSCHIG00000020419;ENSCHIG00000023493;ENSCHIG00000023627;ENSCHIG00000023773;ENSCHIG00000024391;ENSCHIG00000025100;ENSCHIG00000026695	K20995+K05853+K00922+K17902+K05858+K01540+K08187+K04345+K05857+K08526
Human Diseases	Neurodegenerative disease	Pathways of neurodegeneration - multiple diseases	46	557	0.0825853	0.983837	1	ko05022	ENSCHIG00000000241;ENSCHIG00000001342;ENSCHIG00000004376;ENSCHIG00000005207;ENSCHIG00000005457;ENSCHIG00000006056;ENSCHIG00000007513;ENSCHIG00000008551;ENSCHIG00000009624;ENSCHIG00000010331;ENSCHIG00000010919;ENSCHIG00000011236;ENSCHIG00000011401;ENSCHIG00000011503;ENSCHIG00000011830;ENSCHIG00000012374;ENSCHIG00000012488;ENSCHIG00000013326;ENSCHIG00000013862;ENSCHIG00000014184;ENSCHIG00000014378;…	K09565+K08738+K11716+K02183+K04849+K08738+K02375+K02842+K02738+K10408+K01357+K04131+K10408+K04397+K07607+K04440+K04129+K10408+K19722+K05634+K00444+K00572+K10396+K04604+K00312+K00432+K10408+K05853+K04441+K07374+K04573+K05036+K01384+K00714+K13241+K01357+K00445+K05858+K04519+K07375+K23932+K04966+K08738+K02354+K10407+K02432
Human Diseases	Immune disease	Inflammatory bowel disease	7	85	0.0823529	0.827119	1	ko05321	ENSCHIG00000008358;ENSCHIG00000018211;ENSCHIG00000021365;ENSCHIG00000022239;ENSCHIG00000024469;ENSCHIG00000024746;ENSCHIG00000025775	K05494+K05445+K10785+K05489+K04519+K10165+K08532
Human Diseases	Immune disease	Systemic lupus erythematosus	14	172	0.0813953	0.901355	1	ko05322	ENSCHIG00000009774;ENSCHIG00000010165;ENSCHIG00000011041;ENSCHIG00000011449;ENSCHIG00000012445;ENSCHIG00000013209;ENSCHIG00000013577;ENSCHIG00000014396;ENSCHIG00000014791;ENSCHIG00000014983;ENSCHIG00000021210;ENSCHIG00000021365;ENSCHIG00000022824;ENSCHIG00000024628	K11254+K06856+K03994+K11251+K06856+K11252+K06856+K01332+K04000+K06856+K03995+K10785+K06856+K06856
Human Diseases	Neurodegenerative disease	Alzheimer disease	37	457	0.0809628	0.980471	1	ko05010	ENSCHIG00000000241;ENSCHIG00000001342;ENSCHIG00000004376;ENSCHIG00000005207;ENSCHIG00000006056;ENSCHIG00000007513;ENSCHIG00000008551;ENSCHIG00000008680;ENSCHIG00000009624;ENSCHIG00000010919;ENSCHIG00000011236;ENSCHIG00000011503;ENSCHIG00000012374;ENSCHIG00000012488;ENSCHIG00000013862;ENSCHIG00000014378;ENSCHIG00000014632;ENSCHIG00000015115;ENSCHIG00000015813;ENSCHIG00000016159;ENSCHIG00000018453;…	K09565+K08738+K11716+K02183+K08738+K02375+K02842+K14712+K02738+K01357+K04131+K04397+K04440+K04129+K19722+K00444+K00572+K10396+K04604+K00312+K05853+K07374+K14710+K00922+K01384+K00714+K14711+K13241+K01357+K00445+K05858+K04519+K07375+K08738+K02354+K10407+K02432
Human Diseases	Substance dependence	Alcoholism	16	199	0.080402	0.922788	1	ko05034	ENSCHIG00000000426;ENSCHIG00000005207;ENSCHIG00000009774;ENSCHIG00000010417;ENSCHIG00000011449;ENSCHIG00000013209;ENSCHIG00000013689;ENSCHIG00000013813;ENSCHIG00000021410;ENSCHIG00000022780;ENSCHIG00000022874;ENSCHIG00000023122;ENSCHIG00000024391;ENSCHIG00000025478;ENSCHIG00000026891;ENSCHIG00000027251	K04541+K02183+K11254+K11418+K11251+K11252+K01593+K17449+K05036+K15985+K08045+K04360+K04345+K09048+K05214+K15494
Metabolism	Glycan biosynthesis and metabolism	Glycosaminoglycan biosynthesis - heparan sulfate / heparin	2	25	0.08	0.769997	1	ko00534	ENSCHIG00000004675;ENSCHIG00000019513	K01024+K08104
Environmental Information Processing	Signal transduction	Notch signaling pathway	5	63	0.0793651	0.826117	1	ko04330	ENSCHIG00000015794;ENSCHIG00000016952;ENSCHIG00000018660;ENSCHIG00000019014;ENSCHIG00000021904	K21635+K20995+K04497+K04497+K06058
Organismal Systems	Nervous system	Long-term potentiation	5	63	0.0793651	0.826117	1	ko04720	ENSCHIG00000005207;ENSCHIG00000015813;ENSCHIG00000023493;ENSCHIG00000024391;ENSCHIG00000024549	K02183+K04604+K05858+K04345+K08041
Human Diseases	Cancer: specific types	Acute myeloid leukemia	5	64	0.078125	0.836406	1	ko05221	ENSCHIG00000008305;ENSCHIG00000011350;ENSCHIG00000019728;ENSCHIG00000026333;ENSCHIG00000026731	K10055+K04391+K00922+K10056+K05090
Metabolism	Carbohydrate metabolism	Ascorbate and aldarate metabolism	2	26	0.0769231	0.788755	1	ko00053	ENSCHIG00000020938;ENSCHIG00000026715	K00699+K01195
Human Diseases	Cancer: specific types	Thyroid cancer	3	39	0.0769231	0.809269	1	ko05216	ENSCHIG00000006042;ENSCHIG00000021480;ENSCHIG00000026695	K06625+K05126+K08526
Human Diseases	Infectious disease: bacterial	Salmonella infection	22	288	0.0763889	0.973306	1	ko05132	ENSCHIG00000001342;ENSCHIG00000003071;ENSCHIG00000005122;ENSCHIG00000006056;ENSCHIG00000006667;ENSCHIG00000010774;ENSCHIG00000011350;ENSCHIG00000011503;ENSCHIG00000012025;ENSCHIG00000012374;ENSCHIG00000015115;ENSCHIG00000018583;ENSCHIG00000019158;ENSCHIG00000019284;ENSCHIG00000019472;ENSCHIG00000019728;ENSCHIG00000021903;ENSCHIG00000022311;ENSCHIG00000024469;ENSCHIG00000025595;ENSCHIG00000025853;…	K08738+K04409+K04722+K08738+K04722+K20917+K04391+K04397+K23934+K04440+K10396+K04441+K00923+K08727+K07374+K00922+K07898+K04722+K04519+K07375+K08738+K10407
Human Diseases	Cancer: specific types	Pancreatic cancer	6	79	0.0759494	0.869626	1	ko05212	ENSCHIG00000006042;ENSCHIG00000007326;ENSCHIG00000012374;ENSCHIG00000019728;ENSCHIG00000020547;ENSCHIG00000024845	K06625+K09389+K04440+K00922+K04361+K07860
Human Diseases	Infectious disease: viral	Epstein-Barr virus infection	20	265	0.0754717	0.972044	1	ko05169	ENSCHIG00000001342;ENSCHIG00000006042;ENSCHIG00000006056;ENSCHIG00000007326;ENSCHIG00000010165;ENSCHIG00000010779;ENSCHIG00000011914;ENSCHIG00000012374;ENSCHIG00000012445;ENSCHIG00000013577;ENSCHIG00000014983;ENSCHIG00000015403;ENSCHIG00000018583;ENSCHIG00000019728;ENSCHIG00000021365;ENSCHIG00000021899;ENSCHIG00000022824;ENSCHIG00000023900;ENSCHIG00000024628;ENSCHIG00000025853	K08738+K06625+K08738+K09389+K06856+K06751+K01510+K04440+K06856+K06856+K06856+K12671+K04441+K00922+K10785+K06751+K06856+K01510+K06856+K08738
Metabolism	Carbohydrate metabolism	Pentose phosphate pathway	2	27	0.0740741	0.806152	1	ko00030	ENSCHIG00000003090;ENSCHIG00000008125	K01623+K11529
Environmental Information Processing	Signal transduction	Hippo signaling pathway - multiple species	2	27	0.0740741	0.806152	1	ko04392	ENSCHIG00000003071;ENSCHIG00000025926	K04409+K16682
Environmental Information Processing	Signal transduction	Hedgehog signaling pathway	4	54	0.0740741	0.850287	1	ko04340	ENSCHIG00000016564;ENSCHIG00000017723;ENSCHIG00000024391;ENSCHIG00000026286	K11989+K11101+K04345+K20020
Organismal Systems	Immune system	RIG-I-like receptor signaling pathway	6	82	0.0731707	0.891178	1	ko04622	ENSCHIG00000010114;ENSCHIG00000010381;ENSCHIG00000012374;ENSCHIG00000015403;ENSCHIG00000017728;ENSCHIG00000018583	K12170+K12654+K04440+K12671+K12653+K04441
Human Diseases	Cancer: specific types	Renal cell carcinoma	5	70	0.0714286	0.8881	1	ko05211	ENSCHIG00000003071;ENSCHIG00000006042;ENSCHIG00000016866;ENSCHIG00000016948;ENSCHIG00000019728	K04409+K06625+K09095+K09592+K00922
Genetic Information Processing	Folding, sorting and degradation	Proteasome	4	57	0.0701754	0.878293	1	ko03050	ENSCHIG00000009624;ENSCHIG00000012829;ENSCHIG00000021513;ENSCHIG00000023396	K02738+K02740+K02741+K02733
Metabolism	Amino acid metabolism	Lysine degradation	5	72	0.0694444	0.901891	1	ko00310	ENSCHIG00000000476;ENSCHIG00000009525;ENSCHIG00000011546;ENSCHIG00000013637;ENSCHIG00000022515	K07511+K11431+K00306+K00022+K18201
Cellular Processes	Cell growth and death	Oocyte meiosis	9	132	0.0681818	0.956244	1	ko04114	ENSCHIG00000005207;ENSCHIG00000011829;ENSCHIG00000018583;ENSCHIG00000018863;ENSCHIG00000022851;ENSCHIG00000022874;ENSCHIG00000023502;ENSCHIG00000024391;ENSCHIG00000024549	K02183+K06633+K04441+K05459+K06631+K08045+K08042+K04345+K08041
Organismal Systems	Nervous system	Neurotrophin signaling pathway	8	119	0.0672269	0.952852	1	ko04722	ENSCHIG00000005207;ENSCHIG00000010670;ENSCHIG00000012374;ENSCHIG00000013813;ENSCHIG00000018583;ENSCHIG00000019080;ENSCHIG00000019728;ENSCHIG00000023122	K02183+K05101+K04440+K17449+K04441+K02583+K00922+K04360
Human Diseases	Neurodegenerative disease	Prion disease	23	345	0.0666667	0.997249	1	ko05020	ENSCHIG00000000241;ENSCHIG00000001342;ENSCHIG00000005457;ENSCHIG00000006056;ENSCHIG00000009624;ENSCHIG00000011041;ENSCHIG00000012374;ENSCHIG00000014184;ENSCHIG00000014791;ENSCHIG00000015115;ENSCHIG00000016688;ENSCHIG00000018583;ENSCHIG00000019472;ENSCHIG00000019728;ENSCHIG00000021210;ENSCHIG00000024391;ENSCHIG00000024469;ENSCHIG00000024845;ENSCHIG00000025478;ENSCHIG00000025595;ENSCHIG00000025853;…	K09565+K08738+K04849+K08738+K02738+K03994+K04440+K05634+K04000+K10396+K12499+K04441+K07374+K00922+K03995+K04345+K04519+K07860+K09048+K07375+K08738+K10407+K05214
Cellular Processes	Cell growth and death	Necroptosis	12	182	0.0659341	0.98153	1	ko04217	ENSCHIG00000005122;ENSCHIG00000006667;ENSCHIG00000006747;ENSCHIG00000009050;ENSCHIG00000011449;ENSCHIG00000012374;ENSCHIG00000019198;ENSCHIG00000020304;ENSCHIG00000022311;ENSCHIG00000024469;ENSCHIG00000026459;ENSCHIG00000026712	K04722+K04722+K12965+K16342+K11251+K04440+K16342+K12967+K04722+K04519+K16342+K16342
Human Diseases	Infectious disease: viral	Kaposi sarcoma-associated herpesvirus infection	15	232	0.0646552	0.992024	1	ko05167	ENSCHIG00000000426;ENSCHIG00000001342;ENSCHIG00000005207;ENSCHIG00000006042;ENSCHIG00000006056;ENSCHIG00000007326;ENSCHIG00000010779;ENSCHIG00000012374;ENSCHIG00000018583;ENSCHIG00000019728;ENSCHIG00000020041;ENSCHIG00000021899;ENSCHIG00000024071;ENSCHIG00000025853;ENSCHIG00000026175	K04541+K08738+K02183+K06625+K08738+K09389+K06751+K04440+K04441+K00922+K04179+K06751+K05505+K08738+K05505
Human Diseases	Infectious disease: viral	Human T-cell leukemia virus 1 infection	17	266	0.0639098	0.995585	1	ko05166	ENSCHIG00000006042;ENSCHIG00000007326;ENSCHIG00000008229;ENSCHIG00000010779;ENSCHIG00000012374;ENSCHIG00000012562;ENSCHIG00000013024;ENSCHIG00000019728;ENSCHIG00000021365;ENSCHIG00000021899;ENSCHIG00000022874;ENSCHIG00000022890;ENSCHIG00000023502;ENSCHIG00000024086;ENSCHIG00000024391;ENSCHIG00000024549;ENSCHIG00000025478	K06625+K09389+K11126+K06751+K04440+K05074+K04386+K00922+K10785+K06751+K08045+K04502+K08042+K04387+K04345+K08041+K09048
Environmental Information Processing	Signal transduction	Hippo signaling pathway - fly	1	16	0.0625	0.840142	1	ko04391	ENSCHIG00000012906	K09236
Metabolism	Carbohydrate metabolism	Pentose and glucuronate interconversions	2	32	0.0625	0.875301	1	ko00040	ENSCHIG00000020938;ENSCHIG00000026715	K00699+K01195
Cellular Processes	Transport and catabolism	Autophagy - animal	9	145	0.062069	0.980339	1	ko04140	ENSCHIG00000012374;ENSCHIG00000016843;ENSCHIG00000019728;ENSCHIG00000020147;ENSCHIG00000020875;ENSCHIG00000021903;ENSCHIG00000023855;ENSCHIG00000024391;ENSCHIG00000024543	K04440+K15464+K00922+K16186+K01365+K07898+K20402+K04345+K17907
Human Diseases	Infectious disease: viral	Human immunodeficiency virus 1 infection	17	274	0.0620438	0.997238	1	ko05170	ENSCHIG00000000426;ENSCHIG00000001342;ENSCHIG00000003071;ENSCHIG00000005207;ENSCHIG00000006056;ENSCHIG00000010381;ENSCHIG00000010779;ENSCHIG00000012374;ENSCHIG00000012694;ENSCHIG00000018019;ENSCHIG00000018583;ENSCHIG00000019728;ENSCHIG00000021365;ENSCHIG00000021618;ENSCHIG00000021899;ENSCHIG00000024845;ENSCHIG00000025853	K04541+K08738+K04409+K02183+K08738+K12654+K06751+K04440+K18750+K05744+K04441+K00922+K10785+K10648+K06751+K07860+K08738
Human Diseases	Infectious disease: viral	Hepatitis B	11	182	0.0604396	0.991126	1	ko05161	ENSCHIG00000001342;ENSCHIG00000006042;ENSCHIG00000006056;ENSCHIG00000007326;ENSCHIG00000012374;ENSCHIG00000016983;ENSCHIG00000018583;ENSCHIG00000019542;ENSCHIG00000019728;ENSCHIG00000025478;ENSCHIG00000025853	K08738+K06625+K08738+K09389+K04440+K01403+K04441+K14341+K00922+K09048+K08738
Organismal Systems	Excretory system	Vasopressin-regulated water reabsorption	3	50	0.06	0.91867	1	ko04962	ENSCHIG00000021187;ENSCHIG00000024391;ENSCHIG00000025478	K09876+K04345+K09048
Human Diseases	Infectious disease: bacterial	Shigellosis	5	84	0.0595238	0.957404	1	ko05131	ENSCHIG00000001342;ENSCHIG00000006056;ENSCHIG00000011350;ENSCHIG00000018583;ENSCHIG00000025999	K08738+K08738+K04391+K04441+K18050
Organismal Systems	Immune system	T cell receptor signaling pathway	7	118	0.059322	0.977119	1	ko04660	ENSCHIG00000003071;ENSCHIG00000012374;ENSCHIG00000018583;ENSCHIG00000019728;ENSCHIG00000020344;ENSCHIG00000021365;ENSCHIG00000026907	K04409+K04440+K04441+K00922+K06459+K10785+K06458
Human Diseases	Endocrine and metabolic disease	Non-alcoholic fatty liver disease	12	203	0.0591133	0.994891	1	ko04932	ENSCHIG00000001342;ENSCHIG00000006056;ENSCHIG00000006078;ENSCHIG00000011290;ENSCHIG00000011503;ENSCHIG00000012374;ENSCHIG00000012394;ENSCHIG00000018583;ENSCHIG00000019728;ENSCHIG00000023226;ENSCHIG00000024469;ENSCHIG00000025853	K08738+K08738+K12406+K04696+K04397+K04440+K05055+K04441+K00922+K05062+K04519+K08738
Metabolism	Lipid metabolism	Fatty acid biosynthesis	1	17	0.0588235	0.857466	1	ko00061	ENSCHIG00000022508	K01897
Human Diseases	Infectious disease: viral	Coronavirus disease - COVID-19	30	510	0.0588235	0.999975	1	ko05171	ENSCHIG00000000713;ENSCHIG00000000883;ENSCHIG00000009521;ENSCHIG00000009632;ENSCHIG00000010165;ENSCHIG00000010381;ENSCHIG00000011041;ENSCHIG00000011470;ENSCHIG00000012374;ENSCHIG00000012394;ENSCHIG00000012445;ENSCHIG00000013577;ENSCHIG00000014396;ENSCHIG00000014791;ENSCHIG00000014983;ENSCHIG00000015403;ENSCHIG00000018583;ENSCHIG00000018896;ENSCHIG00000019728;ENSCHIG00000019947;ENSCHIG00000020547;…	K02880+K02921+K02947+K02979+K06856+K12654+K03994+K04166+K04440+K05055+K06856+K06856+K01332+K04000+K06856+K12671+K04441+K01334+K00922+K02957+K04361+K03917+K03995+K08523+K06856+K01335+K04519+K09633+K06496+K06856
Cellular Processes	Cell growth and death	Cellular senescence	10	180	0.0555556	0.99556	1	ko04218	ENSCHIG00000005207;ENSCHIG00000006042;ENSCHIG00000007326;ENSCHIG00000010779;ENSCHIG00000013785;ENSCHIG00000018583;ENSCHIG00000019728;ENSCHIG00000020858;ENSCHIG00000021899;ENSCHIG00000024310	K02183+K06625+K09389+K06751+K04973+K04441+K00922+K03982+K06751+K10138
Human Diseases	Cardiovascular disease	Diabetic cardiomyopathy	15	274	0.0547445	0.999421	1	ko05415	ENSCHIG00000000241;ENSCHIG00000011470;ENSCHIG00000012374;ENSCHIG00000013862;ENSCHIG00000016983;ENSCHIG00000018453;ENSCHIG00000018583;ENSCHIG00000019728;ENSCHIG00000020419;ENSCHIG00000020498;ENSCHIG00000021319;ENSCHIG00000021854;ENSCHIG00000023493;ENSCHIG00000024845;ENSCHIG00000025647	K09565+K04166+K04440+K19722+K01403+K05853+K04441+K00922+K17902+K12044+K06236+K00820+K05858+K07860+K06236
Human Diseases	Neurodegenerative disease	Huntington disease	21	390	0.0538462	0.999959	1	ko05016	ENSCHIG00000000241;ENSCHIG00000001342;ENSCHIG00000005457;ENSCHIG00000006056;ENSCHIG00000009624;ENSCHIG00000010331;ENSCHIG00000011401;ENSCHIG00000012374;ENSCHIG00000013326;ENSCHIG00000015115;ENSCHIG00000015813;ENSCHIG00000015991;ENSCHIG00000017045;ENSCHIG00000017366;ENSCHIG00000018276;ENSCHIG00000019472;ENSCHIG00000023493;ENSCHIG00000025478;ENSCHIG00000025595;ENSCHIG00000025853;ENSCHIG00000026294	K09565+K08738+K04849+K08738+K02738+K10408+K10408+K04440+K10408+K10396+K04604+K07202+K05614+K00432+K10408+K07374+K05858+K09048+K07375+K08738+K10407
Metabolism	Global and overview maps	2-Oxocarboxylic acid metabolism	1	19	0.0526316	0.886691	1	ko01210	ENSCHIG00000007853	K11067
Human Diseases	Cancer: overview	Viral carcinogenesis	12	228	0.0526316	0.999041	1	ko05203	ENSCHIG00000006042;ENSCHIG00000009774;ENSCHIG00000010417;ENSCHIG00000010779;ENSCHIG00000013209;ENSCHIG00000014472;ENSCHIG00000019728;ENSCHIG00000020041;ENSCHIG00000021899;ENSCHIG00000023913;ENSCHIG00000024391;ENSCHIG00000025478	K06625+K11254+K11418+K06751+K11252+K05768+K00922+K04179+K06751+K08665+K04345+K09048
Human Diseases	Cancer: specific types	Endometrial cancer	3	58	0.0517241	0.958192	1	ko05213	ENSCHIG00000006042;ENSCHIG00000019728;ENSCHIG00000020547	K06625+K00922+K04361
Metabolism	Amino acid metabolism	Histidine metabolism	1	20	0.05	0.898975	1	ko00340	ENSCHIG00000023934	K01468
Metabolism	Metabolism of cofactors and vitamins	Porphyrin metabolism	2	40	0.05	0.940357	1	ko00860	ENSCHIG00000020938;ENSCHIG00000026715	K00699+K01195
Cellular Processes	Transport and catabolism	Mitophagy - animal	4	82	0.0487805	0.982141	1	ko04137	ENSCHIG00000012374;ENSCHIG00000016843;ENSCHIG00000021903;ENSCHIG00000024543	K04440+K15464+K07898+K17907
Human Diseases	Cancer: specific types	Chronic myeloid leukemia	4	82	0.0487805	0.982141	1	ko05220	ENSCHIG00000006042;ENSCHIG00000007326;ENSCHIG00000013813;ENSCHIG00000019728	K06625+K09389+K17449+K00922
Cellular Processes	Transport and catabolism	Endocytosis	13	269	0.0483271	0.999868	1	ko04144	ENSCHIG00000005194;ENSCHIG00000010779;ENSCHIG00000014852;ENSCHIG00000015013;ENSCHIG00000015115;ENSCHIG00000017026;ENSCHIG00000020328;ENSCHIG00000020547;ENSCHIG00000020838;ENSCHIG00000021859;ENSCHIG00000021899;ENSCHIG00000023444;ENSCHIG00000026821	K04363+K06751+K12494+K00889+K10396+K19475+K11247+K04361+K05050+K06093+K06751+K05095+K13649
Human Diseases	Neurodegenerative disease	Parkinson disease	17	353	0.0481586	0.999986	1	ko05012	ENSCHIG00000000241;ENSCHIG00000001342;ENSCHIG00000005207;ENSCHIG00000006056;ENSCHIG00000008680;ENSCHIG00000009624;ENSCHIG00000012374;ENSCHIG00000015115;ENSCHIG00000019472;ENSCHIG00000019540;ENSCHIG00000021410;ENSCHIG00000022298;ENSCHIG00000022874;ENSCHIG00000024391;ENSCHIG00000025595;ENSCHIG00000025853;ENSCHIG00000026294	K09565+K08738+K02183+K08738+K14712+K02738+K04440+K10396+K07374+K14710+K05036+K14711+K08045+K04345+K07375+K08738+K10407
Human Diseases	Cancer: overview	PD-L1 expression and PD-1 checkpoint pathway in cancer	5	105	0.047619	0.991484	1	ko05235	ENSCHIG00000018583;ENSCHIG00000019728;ENSCHIG00000020547;ENSCHIG00000021365;ENSCHIG00000021612	K04441+K00922+K04361+K10785+K09034
Cellular Processes	Cell growth and death	Ferroptosis	3	64	0.046875	0.975108	1	ko04216	ENSCHIG00000014184;ENSCHIG00000022508;ENSCHIG00000025257	K05634+K01897+K11205
Metabolism	Glycan biosynthesis and metabolism	Various types of N-glycan biosynthesis	2	43	0.0465116	0.955123	1	ko00513	ENSCHIG00000007488;ENSCHIG00000021685	K00717+K09673
Human Diseases	Neurodegenerative disease	Amyotrophic lateral sclerosis	21	458	0.0458515	1	1	ko05014	ENSCHIG00000001342;ENSCHIG00000002290;ENSCHIG00000006056;ENSCHIG00000009624;ENSCHIG00000010331;ENSCHIG00000010811;ENSCHIG00000011115;ENSCHIG00000011401;ENSCHIG00000011830;ENSCHIG00000013326;ENSCHIG00000015115;ENSCHIG00000017366;ENSCHIG00000018276;ENSCHIG00000018468;ENSCHIG00000018583;ENSCHIG00000019472;ENSCHIG00000019945;ENSCHIG00000022769;ENSCHIG00000025595;ENSCHIG00000025853;ENSCHIG00000026294	K08738+K05455+K08738+K02738+K10408+K16631+K05456+K10408+K07607+K10408+K10396+K00432+K10408+K14314+K04441+K07374+K04573+K13241+K07375+K08738+K10407
Organismal Systems	Circulatory system	Cardiac muscle contraction	5	111	0.045045	0.994771	1	ko04260	ENSCHIG00000013367;ENSCHIG00000018453;ENSCHIG00000020204;ENSCHIG00000020498;ENSCHIG00000023627	K04865+K05853+K10373+K12044+K01540
Organismal Systems	Immune system	Th1 and Th2 cell differentiation	5	112	0.0446429	0.995184	1	ko04658	ENSCHIG00000012374;ENSCHIG00000015794;ENSCHIG00000016952;ENSCHIG00000018583;ENSCHIG00000021365	K04440+K21635+K20995+K04441+K10785
Genetic Information Processing	Translation	Aminoacyl-tRNA biosynthesis	2	46	0.0434783	0.966354	1	ko00970	ENSCHIG00000015264;ENSCHIG00000023952	K01868+K01867
Metabolism	Energy metabolism	Oxidative phosphorylation	9	209	0.0430622	0.99981	1	ko00190	ENSCHIG00000001342;ENSCHIG00000006056;ENSCHIG00000011623;ENSCHIG00000014286;ENSCHIG00000016191;ENSCHIG00000017272;ENSCHIG00000019660;ENSCHIG00000023218;ENSCHIG00000025853	K08738+K08738+K02153+K02147+K01507+K02148+K01542+K01544+K08738
Cellular Processes	Cell growth and death	Cell cycle	6	143	0.041958	0.998778	1	ko04110	ENSCHIG00000001148;ENSCHIG00000006042;ENSCHIG00000007326;ENSCHIG00000011829;ENSCHIG00000014573;ENSCHIG00000022851	K06644+K06625+K09389+K06633+K06639+K06631
Human Diseases	Infectious disease: viral	Measles	7	173	0.0404624	0.999659	1	ko05162	ENSCHIG00000001342;ENSCHIG00000006056;ENSCHIG00000012374;ENSCHIG00000019728;ENSCHIG00000021365;ENSCHIG00000024469;ENSCHIG00000025853	K08738+K08738+K04440+K00922+K10785+K04519+K08738
Metabolism	Glycan biosynthesis and metabolism	N-Glycan biosynthesis	2	53	0.0377358	0.983021	1	ko00510	ENSCHIG00000007488;ENSCHIG00000013738	K00717+K00779
Cellular Processes	Transport and catabolism	Lysosome	5	137	0.0364964	0.999433	1	ko04142	ENSCHIG00000005568;ENSCHIG00000013901;ENSCHIG00000017748;ENSCHIG00000020875;ENSCHIG00000026715	K08569+K01275+K12386+K01365+K01195
Human Diseases	Infectious disease: viral	Herpes simplex virus 1 infection	15	418	0.0358852	1	1	ko05168	ENSCHIG00000001342;ENSCHIG00000006056;ENSCHIG00000010381;ENSCHIG00000010779;ENSCHIG00000011041;ENSCHIG00000011290;ENSCHIG00000014207;ENSCHIG00000016688;ENSCHIG00000017342;ENSCHIG00000019728;ENSCHIG00000021899;ENSCHIG00000022343;ENSCHIG00000024469;ENSCHIG00000025853;ENSCHIG00000026297	K08738+K08738+K12654+K06751+K03994+K04696+K15411+K12499+K09364+K00922+K06751+K09228+K04519+K08738+K06081
Organismal Systems	Environmental adaptation	Thermogenesis	11	309	0.0355987	1	1	ko04714	ENSCHIG00000014973;ENSCHIG00000015991;ENSCHIG00000018583;ENSCHIG00000021277;ENSCHIG00000022508;ENSCHIG00000022874;ENSCHIG00000023502;ENSCHIG00000024391;ENSCHIG00000024549;ENSCHIG00000025478;ENSCHIG00000025871	K19477+K07202+K04441+K05259+K01897+K08045+K08042+K04345+K08041+K09048+K11416
Genetic Information Processing	Folding, sorting and degradation	Protein processing in endoplasmic reticulum	6	194	0.0309278	0.999986	1	ko04141	ENSCHIG00000004836;ENSCHIG00000012374;ENSCHIG00000014840;ENSCHIG00000018647;ENSCHIG00000023633;ENSCHIG00000025731	K10950+K04440+K13989+K14014+K09485+K14020
Genetic Information Processing	Folding, sorting and degradation	SNARE interactions in vesicular transport	1	33	0.030303	0.9773	1	ko04130	ENSCHIG00000002872	K08487
Cellular Processes	Transport and catabolism	Autophagy - other	1	36	0.0277778	0.983921	1	ko04136	ENSCHIG00000024543	K17907
Genetic Information Processing	Folding, sorting and degradation	RNA degradation	2	85	0.0235294	0.999354	1	ko03018	ENSCHIG00000018278;ENSCHIG00000025759	K01689+K13126
Human Diseases	Infectious disease: bacterial	Bacterial invasion of epithelial cells	2	91	0.021978	0.999656	1	ko05100	ENSCHIG00000013813;ENSCHIG00000019728	K17449+K00922
Genetic Information Processing	Replication and repair	Homologous recombination	1	46	0.0217391	0.994911	1	ko03440	ENSCHIG00000026071	K19528
Genetic Information Processing	Translation	mRNA surveillance pathway	2	102	0.0196078	0.999893	1	ko03015	ENSCHIG00000016344;ENSCHIG00000025759	K04354+K13126
Genetic Information Processing	Translation	Nucleocytoplasmic transport	2	131	0.0152672	0.999995	1	ko03013	ENSCHIG00000016589;ENSCHIG00000018468	K03231+K14314
Genetic Information Processing	Translation	Ribosome biogenesis in eukaryotes	1	80	0.0125	0.999899	1	ko03008	ENSCHIG00000011324	K03264
Genetic Information Processing	Translation	Ribosome	5	412	0.0121359	1	1	ko03010	ENSCHIG00000000713;ENSCHIG00000000883;ENSCHIG00000009521;ENSCHIG00000009632;ENSCHIG00000019947	K02880+K02921+K02947+K02979+K02957
Organismal Systems	Sensory system	Olfactory transduction	5	757	0.00660502	1	1	ko04740	ENSCHIG00000005207;ENSCHIG00000011821;ENSCHIG00000014078;ENSCHIG00000014973;ENSCHIG00000024391	K02183+K04257+K04257+K19477+K04345
Genetic Information Processing	Folding, sorting and degradation	Ubiquitin mediated proteolysis	1	167	0.00598802	1	1	ko04120	ENSCHIG00000011290	K04696
