# Supplementary material for: Reductive acetogenesis is a dominant process in the ruminant hindgut
Source: Research Square preprint supplement (doi:10.21203/rs.3.rs-4473149/v1), 2024-06-10
Supplement: Supplementary file 8 [file 92b1c6997fc966ad8123bd50.xlsx]

## Sheet: abundance
		Rumen			Cecum
Hydrogenase and terminal reductases	Hydrogenase type	Mean	SD	SEM	Mean	SD	SEM	P value	FDR Adj PValue	Fold Change1
FeFeA1	Fermentative hydrogenase	21.1482	15.133	3.78326	11.2948	5.67686	1.41922	0.0973	0.0972544	1.87239
FeFeA2	Fermentative hydrogenase	7.09225	2.24764	0.56191	26.1272	4.92178	1.23044	<.0001	3.74878e-06	3.68392
FeFeB	Fermentative hydrogenase	33.4585	7.7399	1.93498	177.841	30.7893	7.69731	<.0001	3.74878e-06	5.31528
FeFeA3	Bifurcating hydrogenase	112.624	22.8261	5.70653	198.297	31.1863	7.79656	<.0001	4.92731e-06	1.76071
FeFeA4	Bifurcating hydrogenase	2.06219	1.69354	0.423384	0.35151	0.384558	0.0961394	0.0001	0.000187868	5.86666
NiFe1a	Respiratory hydrogenase	0	0	0	0.0386358	0.0594099	0.0148525	0.0035	0.00958789	3.86358
NiFe1b	Respiratory hydrogenase	0.221039	0.175968	0.0439919	0.382346	0.441661	0.110415	0.4975	0.497518	1.72977
NiFe1c	Respiratory hydrogenase	0.0715003	0.104119	0.0260297	0.192264	0.75139	0.187848	0.2125	0.224278	2.68899
NiFe1d	Respiratory hydrogenase	3.59278	2.3328	0.583201	0.131287	0.474025	0.118506	<.0001	4.22146e-05	27.3658
NiFe1f	Respiratory hydrogenase	0	0	0	0.476978	1.67426	0.418566	0.1508	0.1685	47.6978
NiFe1h	Respiratory hydrogenase	0.0210484	0.0236235	0.00590588	0.0729165	0.0685942	0.0171486	0.021	0.039861	3.46423
NiFe1i	Respiratory hydrogenase	0.221835	0.155718	0.0389295	0.537522	0.306654	0.0766635	0.0006	0.00219715	2.42307
NiFe3a	methanogenic hydrogenase	5.67557	7.38811	1.84703	6.2714	2.32466	0.581164	0.0317	0.0547415	1.10498
NiFe3c	methanogenic hydrogenase	7.07206	9.06059	2.26515	7.86028	2.94241	0.735602	0.0348	0.0551134	1.11146
NiFe4h	methanogenic hydrogenase	5.44249	7.77738	1.94434	5.77177	1.76689	0.441724	0.0195	0.039861	1.0605
NiFe4i	methanogenic hydrogenase	6.514	8.82563	2.20641	6.34752	2.15109	0.537772	0.083	0.112606	1.02623
Fe	methanogenic hydrogenase	3.81352	5.93526	1.48381	4.15074	2.20772	0.551931	0.0899	0.113855	1.08843
NiFe4a	Energy-converting hydrogenase	0	0	0	0.249755	0.952568	0.238142	0.0171	0.039861	24.9755
NiFe4c	Energy-converting hydrogenase	0.113428	0.106951	0.0267379	0.223224	0.19218	0.048045	0.0765	0.111765	1.96799
NiFe4e	Energy-converting hydrogenase	10.7083	3.49822	0.874556	6.18055	1.43581	0.358952	0.0002	0.0010385	1.73259
NiFe4f	Energy-converting hydrogenase	0.946232	0.950854	0.237713	3.27095	1.72177	0.430441	0.0007	0.00219715	3.45681
NiFe4g	Energy-converting hydrogenase	4.12431	1.49591	0.373977	7.2313	2.15888	0.53972	0.0001	0.0010385	1.75334
FeFeC1	Sensory hydrogenase	5.11087	2.0403	0.510074	12.0346	6.85868	1.71467	0.0005	0.000521701	2.35472
FeFeC2	Sensory hydrogenase	6.57959	3.35917	0.839792	1.62618	0.976964	0.244241	<.0001	1.65696e-05	4.04605
FeFeC3	Sensory hydrogenase	6.45425	2.12454	0.531136	84.6732	20.6904	5.17261	<.0001	3.74878e-06	13.119
HydB	Hydrogenase-associated diaphorase	149.97	27.7649	6.94122	312.889	32.1284	8.0321	<.0001	3.09275e-06	2.08634
AcsB	Reductive acetogenesis	10.6765	3.1237	0.780926	131.434	31.4627	7.86568	<.0001	3.51448e-06	12.3106
aprA	Sulfate and sulfite reduction	6.95619	5.41428	1.35357	0.944764	0.471054	0.117764	<.0001	3.51448e-06	7.36289
AsrA	Sulfate and sulfite reduction	6.38435	1.96248	0.49062	8.95919	4.00942	1.00235	0.0262	0.0290803	1.40331
dmsA	Dimethyl sulfoxide and trimethylamine N-oxide reduction	0.0434466	0.0495617	0.0123904	1.16356	3.2111	0.802776	<.0001	8.35832e-06	26.7813
DsrA	Sulfate and sulfite reduction	0.189218	0.144613	0.0361532	3.579	1.84733	0.461832	<.0001	3.51448e-06	18.9147
FrdA	Fumarate reduction	166.843	32.9503	8.23757	81.8736	28.6063	7.15157	<.0001	8.51104e-06	2.03782
McrA	Methanogenesis	8.41596	11.2646	2.81614	8.99747	3.4333	0.858324	0.05	0.0500164	1.0691
NapA	nitrate ammonification	0.575926	0.489641	0.12241	1.25815	0.792415	0.198104	0.0033	0.00410616	2.18456
NarG	nitrate ammonification	2.73895	5.33727	1.33432	0.273892	1.03408	0.25852	<.0001	2.32816e-05	10.0001
NrfA	nitrate ammonification	69.1917	23.5891	5.89728	1.34654	2.01703	0.504257	<.0001	3.51448e-06	51.3849
PS1: If the expression of the gene is 0, we treat it as 0.01 in order to calculate FC.

## Sheet: estimated abundance in communit
	Rumen			Cecum
Hydrogenase and terminal reductases	Mean	SD	SEM	Mean	SD	SEM	P value	FDR Adj PValue
AcsB	13.774	3.77158	0.942896	140.001	33.4534	8.36336	<.0001	7.2298e-06
aprA	8.88052	6.56754	1.64189	0.999947	0.49694	0.124235	<.0001	7.2298e-06
AsrA	8.20953	2.38062	0.595155	9.67901	4.74761	1.1869	0.5718	0.588185
dmsA	0.055732	0.0616897	0.0154224	1.34755	3.86536	0.96634	<.0001	1.83923e-05
DsrA	0.236872	0.169507	0.0423768	3.87267	2.18443	0.546107	<.0001	7.2298e-06
Fe	3.64664	2.3561	0.680149	4.69434	2.2119	0.57111	0.2416	0.255776
FeFeA1	33.7914	19.7588	5.48011	10.6495	2.85885	0.738153	0.0004	0.000755775
FeFeA2	9.28453	3.48289	0.870722	28.058	6.54202	1.63551	<.0001	7.34723e-06
FeFeA3	144.408	24.8849	6.22123	210.44	27.8892	6.97229	<.0001	1.69101e-05
FeFeA4	2.74624	2.35804	0.589511	0.387583	0.452017	0.113004	<.0001	0.000145547
FeFeB	42.8801	8.43422	2.10855	189.505	33.3395	8.33487	<.0001	7.2298e-06
FeFeC1	6.50893	2.34985	0.587463	12.6357	6.88857	1.72214	0.0014	0.00271481
FeFeC2	8.40451	4.19266	1.04816	1.74287	1.06596	0.266491	<.0001	1.39571e-05
FeFeC3	8.291	2.44941	0.612352	89.9287	21.2191	5.30479	<.0001	7.2298e-06
frdA	213.731	32.0924	8.02309	88.4565	35.333	8.83326	<.0001	7.36644e-06
hydB	192.178	27.4223	6.85558	332.702	27.6937	6.92343	<.0001	7.2298e-06
McrA	7.26727	4.26326	1.10077	9.57944	3.64983	0.912457	0.0969	0.120259
NapA	0.726161	0.590563	0.147641	1.3533	0.911143	0.227786	0.0237	0.0356078
NarG	3.41032	6.48518	1.62129	0.326702	1.24213	0.310531	<.0001	3.9113e-05
NiFe1a	0	0	0	0.0410367	0.0644247	0.0161062	0.0035	0.00605551
NiFe1b	0.274342	0.205838	0.0514595	0.412784	0.494844	0.123711	0.763	0.763025
NiFe1c	0.0918906	0.133448	0.0333621	0.230149	0.902388	0.225597	0.2125	0.231789
NiFe1d	4.53969	2.74615	0.686538	0.155514	0.569476	0.142369	<.0001	7.34723e-06
NiFe1f	0	0	0	0.490657	1.73029	0.432573	0.1508	0.180915
NiFe1h	0.0272205	0.0314556	0.00786389	0.0784343	0.0744171	0.0186043	0.0454	0.0629148
NiFe1i	0.278801	0.185658	0.0464145	0.564074	0.306846	0.0767114	0.0023	0.00408087
NiFe3a	4.9697	2.94937	0.761524	6.68415	2.51945	0.629862	0.069	0.0887359
NiFe3c	6.23781	3.90292	1.00773	8.38048	3.17585	0.793962	0.0528	0.0703442
NiFe4a	0	0	0	0.298098	1.14406	0.286015	0.0171	0.0267348
NiFe4c	0.140162	0.125369	0.0313422	0.237204	0.204708	0.0511771	0.1871	0.217267
NiFe4e	13.5903	3.75232	0.938079	6.60723	1.64766	0.411914	<.0001	1.69101e-05
NiFe4f	1.19188	1.15643	0.289108	3.54663	1.97768	0.49442	0.002	0.00378617
NiFe4g	5.29008	1.77112	0.442779	7.64481	2.07973	0.519933	0.0037	0.00606654
NiFe4h	4.52183	2.71189	0.700207	6.13512	1.8598	0.464949	0.0362	0.0520851
NiFe4i	5.58196	3.34612	0.863965	6.74478	2.25398	0.563494	0.2059	0.231641
NrfA	87.9076	26.1006	6.52516	1.519	2.44147	0.610368	<.0001	7.2298e-06

## Sheet: Phylum
Phylum	Fe	NiFe1a	NiFe1b	NiFe1c	NiFe1d	NiFe1f	NiFe1h	NiFe1i	NiFe3a	NiFe3b	NiFe3c	NiFe3d	NiFe4a	NiFe4c	NiFe4e	NiFe4f	NiFe4g	NiFe4h	NiFe4i	FeFeA1	FeFeA2	FeFeA3	FeFeA4	FeFeB	FeFeC1	FeFeC2	FeFeC3	AcsB	hydB	NifH	aprA	AsrA	dmsA	DsrA	frdA	McrA	NapA	NarG	NrfA
Acidobacteria	0	0	0	0	0	0	0	0	0	0	0	0	0	0	0	0	0	0	0	0	0	0.0277848	0	0	0	0	0	0	0	0	0	0	0	0	0	0	0	0	0
Actinobacteria	0	0	0	0	0	0	0.0939649	0.743232	0	0.343583	0	0.0492227	0	0	0.601994	0	0	0	0	0	0.29413	0.396945	0	0.191348	0	0	0	0	0.941791	0	0.012342	0.19723	0.309743	0	0	0	0.798306	0	0.100765
Archaea	7.96426	0	0	0	0	0	0	0	11.947	0	14.9323	0	0	0	0.257009	0	0	11.2143	12.8615	0	0	0	0	0	0	0	0	0.117853	0.0215368	0.0118317	0	0	0	0	14.0381	17.4134	0	0	0
Bacteria_norank	0	0	0	0	0	0	0	0	0	0	0	0	0	0	0.0203256	0	0	0	0	0	0.0348738	15.1544	0	6.6261	0	0.107363	0	3.13622	37.3071	0.00510769	0	0	0	0	20.3171	0	0	0	0
Bacteroidetes	0	0	0	0	0	0	0	0.0161258	0	0	0	0	0	0	0	0	0	0	0	0	0	46.4299	0	18.1176	0	0	0	0	26.2696	2.44925	0	0	0	0	212.33	0	0	0.0401096	67.6203
Candidatus Melainabacteria	0	0	0	0	0	0	0	0	0	0	0	0	0	0	0	0	0	0	0	0	0	0	0	0	0	0	0	0	0.500337	0	0	0	0	0	0	0	0	0	0
Candidatus Nomurabacteria	0	0	0	0	0	0	0	0	0	0	0	0	0	0	0	0	0	0	0	0	0	0.122411	0	0	0	0	0	0	0.0500001	0	0	0	0	0	0	0	0	0	0
Cyanobacteria	0	0	0	0	0	0	0	0	0	0	0	0	0	0	0	0	0	0	0	0	0	0	0	0	0	0	0	0	0.0282434	0	0	0	0	0	0	0	0	0	0
Deferribacteres	0	0	0	0	0	0	0	0	0	0	0	0	0	0	0	0	0	0	0	0	0	0	0	0	0	0	0	0	0	0	0	0	0	0	0	0	0.0680603	0	0
Elusimicrobia	0	0	0	0	0	0	0	0	0	0	0	0	0	0	0	0	0	0	0	0	0	0.0572695	0	0	0	0	0	0	0.215165	0	0	0	0	0	0	0	0	0	0
Fibrobacteres	0	0	0	0	0	0	0	0	0	0	0	0	0	0	0	0	0	0	0	0	0	0	0	0	0	0	0	0	0	2.45435	2.09601	0	0	0	0	0	0	0	0
Firmicutes	0	0	0	0	3.59871	0	0	0	0	0	0	0	0	0	15.9707	4.21718	11.3556	0	0	11.7407	32.653	242.854	2.4137	179.023	17.1455	4.68453	88.3153	135.889	385.909	14.5458	4.61	15.1463	0	2.7139	0.380437	0	0.39341	2.59617	1.61386
Fusobacteria	0	0	0	0	0	0	0	0	0	0	0	0	0	0	0	0	0	0	0	0	0	0	0	0.402099	0	0	0	0	0.217448	0	0	0	0	0	0	0	0	0	0
Lentisphaerae	0	0	0	0	0	0	0	0	0	0	0	0	0	0	0	0	0	0	0	0	0	0.0736145	0	0	0	0	0	0	0.573081	0	0	0	0	0	0	0	0	0	0
Nitrospirae	0	0	0	0	0	0	0	0	0	0	0	0	0	0	0	0	0	0	0	0	0	0.0265745	0	0	0	0	0	0	0	0	0	0	0	0	0	0	0	0	0
Parabasalia	0	0	0	0	0	0	0	0	0	0	0	0	0	0	0	0	0	0	0	20.2867	0	0	0	0	0	0	0	0	0	0	0	0	0	0	0	0	0	0	0
Planctomycetes	0	0	0	0	0	0	0	0	0	0	0	0	0	0	0	0	0	0	0	0	0	0	0	0	0	0	0	0	0.045144	0	0	0	0	0	0	0	0	0	0
Proteobacteria	0	0.0386358	0.603385	0.263764	0.125356	0	0	0	0	0	0	0	0.249755	0.336652	0.0387995	0	0	0	0	0.415702	0.100948	0.676245	0	0.275126	0	0	0.112987	0	2.48799	0.0690865	1.1826	0	0.89726	1.05431	1.65137	0	0.574298	0.376562	1.2033
Spirochaetes	0	0	0	0	0	0	0	0	0	0	0	0	0	0	0	0	0	0	0	0	0.0321448	4.22804	0	6.32002	0	3.41388	2.22066	2.96794	4.45203	6.27415	0	0	0	0	0	0	0	0	0
Synergistetes	0	0	0	0	0	0	0	0	0	0	0	0	0	0	0	0	0	0	0	0	0.104437	0.135861	0	0	0	0	0	0	0.457731	0	0	0	0	0	0	0	0	0	0
Tenericutes	0	0	0	0	0	0	0	0	0	0	0	0	0	0	0	0	0	0	0	0	0	0.322662	0	0.34423	0	0	0.478516	0	2.44235	0	0	0	0	0	0	0	0	0	0
Thermotogae	0	0	0	0	0	0	0	0	0	0	0	0	0	0	0	0	0	0	0	0	0	0	0	0	0	0	0	0	0.0151291	0	0	0	0	0	0	0	0	0	0
Verrucomicrobia	0	0	0	0	0	0.476978	0	0	0	0	0	0	0	0	0	0	0	0	0	0	0	0.41534	0	0	0	0	0	0	0.926054	0	0	0	0	0	0	0	0	0	0

## Sheet: Class
Class	Fe	NiFe1a	NiFe1b	NiFe1c	NiFe1d	NiFe1f	NiFe1h	NiFe1i	NiFe3a	NiFe3b	NiFe3c	NiFe3d	NiFe4a	NiFe4c	NiFe4e	NiFe4f	NiFe4g	NiFe4h	NiFe4i	FeFeA1	FeFeA2	FeFeA3	FeFeA4	FeFeB	FeFeC1	FeFeC2	FeFeC3	AcsB	hydB	NifH	aprA	AsrA	dmsA	DsrA	frdA	McrA	NapA	NarG	NrfA
Actinobacteria	0	0	0	0	0	0	0.0939649	0	0	0	0	0.0492227	0	0	0	0	0	0	0	0	0	0	0	0	0	0	0	0	0	0	0	0	0	0	0	0	0	0	0
Alphaproteobacteria	0	0	0	0	0	0	0	0	0	0	0	0	0	0	0	0	0	0	0	0	0	0.176415	0	0.215641	0	0	0.112987	0	1.97611	0	0	0	0	0	0	0	0.164417	0	0
Bacilli	0	0	0	0	0	0	0	0	0	0	0	0	0	0	0	0	0	0	0	0.0502821	0	0	0	0	0	0	0	0	0.0916501	0	0.0175448	0	0	0	0	0	0	0	0
Bacteria_norank	0	0	0	0	0	0	0	0	0	0	0	0	0	0	0.0203256	0	0	0	0	0	0.0348738	15.1544	0	6.6261	0	0.107363	0	3.13622	37.3071	0.00510769	0	0	0	0	20.3171	0	0	0	0
Bacteroidetes_norank	0	0	0	0	0	0	0	0	0	0	0	0	0	0	0	0	0	0	0	0	0	5.63032	0	0	0	0	0	0	6.67436	0	0	0	0	0	8.4557	0	0	0	0.0505233
Bacteroidia	0	0	0	0	0	0	0	0.0161258	0	0	0	0	0	0	0	0	0	0	0	0	0	40.7995	0	18.1176	0	0	0	0	19.5952	2.44925	0	0	0	0	203.085	0	0	0.0401096	67.5698
Betaproteobacteria	0	0	0	0	0	0	0	0	0	0	0	0	0	0	0	0	0	0	0	0	0	0	0	0	0	0	0	0	0	0	0	0	0	0	0	0	0	0.105379	0
Candidatus Melainabacteria_norank	0	0	0	0	0	0	0	0	0	0	0	0	0	0	0	0	0	0	0	0	0	0	0	0	0	0	0	0	0.500337	0	0	0	0	0	0	0	0	0	0
Candidatus Nomurabacteria_norank	0	0	0	0	0	0	0	0	0	0	0	0	0	0	0	0	0	0	0	0	0	0.122411	0	0	0	0	0	0	0.0500001	0	0	0	0	0	0	0	0	0	0
Clostridia	0	0	0	0	0.0373534	0	0	0	0	0	0	0	0	0	12.5324	0	11.3556	0	0	5.53366	26.2283	225.26	2.4137	166.153	16.7749	4.59493	88.2187	64.3349	355.727	11.7169	3.89462	14.3587	0	2.7139	0	0	0	0	0
Coriobacteriia	0	0	0	0	0	0	0	0.743232	0	0.343583	0	0	0	0	0.601994	0	0	0	0	0	0.29413	0.396945	0	0.191348	0	0	0	0	0.941791	0	0.012342	0.19723	0.309743	0	0	0	0.798306	0	0.100765
Cyanobacteria_norank	0	0	0	0	0	0	0	0	0	0	0	0	0	0	0	0	0	0	0	0	0	0	0	0	0	0	0	0	0.0282434	0	0	0	0	0	0	0	0	0	0
Deltaproteobacteria	0	0	0.221039	0.0708584	0	0	0	0	0	0	0	0	0	0.113428	0	0	0	0	0	0.0206118	0	0	0	0	0	0	0	0	0	0	0.298358	0	0	0.189218	0.100894	0	0.10892	0	0.116729
Elusimicrobia	0	0.0386358	0.217286	0	0	0	0	0	0	0	0	0	0	0.223224	0.0387995	0	0	0	0	0.373397	0.100948	0.49983	0	0.0594842	0	0	0	0	0.496175	0	0.291697	0	0	0.865095	0	0	0.195854	0	0.709459
Endomicrobia	0	0	0	0	0	0	0	0	0	0	0	0	0	0	0	0	0	0	0	0	0	0.0572695	0	0	0	0	0	0	0.205093	0	0	0	0	0	0	0	0	0	0
Erysipelotrichia	0	0	0.16506	0	0	0	0	0	0	0	0	0	0	0	0	0	0	0	0	0	0	0.251338	0	0.0257924	0	0	0	0	1.55026	0	0.0164618	0	0.0559883	0	0	0	0.0459377	0	0.200857
Fibrobacteria	0	0	0	0	0	0	0	0	0	0	0	0	0	0	0	0	0	0	0	0.0170554	0	1.11433	0	0.282393	0	0	0	0	1.96523	2.50094	2.08694	0.116955	0	0	0	0	0	0	0
Firmicutes_norank	0	0	0	0	0	0	0	0	0	0	0	0	0	0	0	0	0	0	0	0	0.545696	0.973403	0	1.87763	0	0	0	3.34496	5.73661	0.0133978	0.00906544	0.0877999	0	0	0	0	0	0	0
Fusobacteriia	0	0	0	0	0	0	0	0	0	0	0	0	0	0	0	0	0	0	0	2.47536	1.21177	12.8497	0	8.15622	0.0131324	0	0.0496894	68.2091	17.4189	0	0	0.582832	0	0	0	0	0	0	0
Gammaproteobacteria	0	0	0	0.000641875	0	0	0	0	0	0	0	0	0	0	0	0	0	0	0	0	0	0	0	0.0144523	0	0	0	0	0.216975	0.0690865	0.588949	0	0	0	1.1655	0	0	0.000573125	0
Holophagae	0	0	0	0.192264	0.125356	0	0	0	0	0	0	0	0.249755	0	0	0	0	0	0	0.0216932	0	0.0277848	0	0	0	0	0	0	0	0	0.00360063	0	0.841272	0	0.384982	0	0.127229	0.27061	0.17625
Lentisphaerae_norank	0	0	0	0	0	0	0	0	0	0	0	0	0	0	0	0	0	0	0	0	0	0	0	0	0	0	0	0	0.145176	0	0	0	0	0	0	0	0	0	0
Lentisphaeria	0	0	0	0	0	0	0	0	0	0	0	0	0	0	0	0	0	0	0	0	0	0.0736145	0	0	0	0	0	0	0.427905	0	0	0	0	0	0	0	0	0	0
Methanobacteria	7.96426	0	0	0	0	0	0	0	11.749	0	14.8209	0	0	0	0	0	0	11.0094	12.8615	0	0	0	0	0	0	0	0	0	0	0.0118317	0	0	0	0	13.8935	17.0099	0	0	0
Mollicutes	0	0	0	0	0	0	0	0	0.197947	0	0	0	0	0	0.257009	0	0	0.204871	0	0	0	0.167489	0	0	0	0	0	0	1.23865	0	0	0	0	0	0.144546	0.190134	0	0	0
Negativicutes	0	0	0	0	3.55627	0	0	0	0	0	0	0	0	0	3.42743	0.946232	0	0	0	0.611308	0	2.46558	0	0.487761	0	0.0887074	0.521464	0	3.94076	1.2125	0.586929	0	0	0	0.378065	0	0.391002	2.59536	1.6131
Opitutae	0	0	0	0	0.00508006	0	0	0	0	0	0	0	0	0	0.0109409	3.27095	0	0	0	3.053	4.21125	0.0949973	0	2.77184	0.357493	0.000892937	0.00394425	0	0.612522	1.55648	0.0944529	0	0	0	0.00237156	0	0.00240719	0.000809687	0.000764563
Parabasalia_norank	0	0	0	0	0	0	0	0	0	0	0	0	0	0	0	0	0	0	0	20.285	0	0.0265745	0	0	0	0	0	0	0	0	0	0	0	0	0	0	0	0	0
Phycisphaerae	0	0	0	0	0	0	0	0	0	0	0	0	0	0	0	0	0	0	0	0	0	0	0	0	0	0	0	0	0.0519314	0	0	0	0	0	0	0	0	0	0
Proteobacteria_norank	0	0	0	0	0	0	0	0	0	0	0	0	0	0	0	0	0	0	0	0.00171756	0	0	0	0	0	0	0	0	0.000875563	0	0	0	0	0	0	0	0	0	0
Spartobacteria	0	0	0	0	0	0	0	0	0	0	0	0	0	0	0	0	0	0	0	0	0	0	0	0	0	0	0	0	0.562564	0	0	0	0	0	0	0	0	0	0
Sphingobacteriia	0	0	0	0	0	0	0	0	0	0	0	0	0	0	0	0	0	0	0	0	0	0	0	0	0	0	0	0	0.132589	0	0	0	0	0	0.786001	0	0	0	0
Spirochaetia	0	0	0	0	0	0	0	0	0	0	0	0	0	0	0	0	0	0	0	0	0	3.20536	0	5.02629	0	3.25294	0.705732	1.04487	2.68456	6.24237	0	0	0	0	0.00328056	0	0	0	0
Synergistia	0	0	0	0	0	0	0	0	0	0	0	0	0	0	0	0	0	0	0	0	0.0610991	0.0466505	0	0	0	0	0	0	0.0313269	0	0	0	0	0	0	0	0	0	0
Thermococci	0	0	0	0	0	0	0	0	0	0	0	0	0	0	0	0	0	0	0	0	0.0321448	1.02268	0	1.29374	0	0.16094	1.51493	1.92307	1.75768	0.0317731	0	0	0	0	0	0	0	0	0
Thermoplasmata	0	0	0	0	0	0	0	0	0	0	0.044724	0	0	0	0	0	0	0	0	0	0.0433377	0.0892104	0	0	0	0	0	0	0.457731	0	0	0	0	0	0	0.0639427	0	0	0
Tissierellia	0	0	0	0	0	0	0	0	0	0	0.0667566	0	0	0	0	0	0	0	0	0	0.366181	0	0	0	0	0	0	0.117853	0	0	0	0	0	0	0	0.149482	0	0	0
Verrucomicrobia_norank	0	0	0	0	0	0	0	0	0	0	0	0	0	0	0	0	0	0	0	0	0	0.338855	0	0	0	0	0	0	0.0982314	0	0	0	0	0	0	0	0	0	0
Verrucomicrobiae	0	0	0	0	0	0	0	0	0	0	0	0	0	0	0	0	0	0	0	0	0.0897485	0	0	0	0	0	0	0	0.16109	0	0	0	0	0	0	0	0	0	0

## Sheet: Genus
Genus	Fe	NiFe1a	NiFe1b	NiFe1c	NiFe1d	NiFe1f	NiFe1h	NiFe1i	NiFe3a	NiFe3b	NiFe3c	NiFe3d	NiFe4a	NiFe4c	NiFe4e	NiFe4f	NiFe4g	NiFe4h	NiFe4i	FeFeA1	FeFeA2	FeFeA3	FeFeA4	FeFeB	FeFeC1	FeFeC2	FeFeC3	AcsB	hydB	NifH	aprA	AsrA	dmsA	DsrA	frdA	McrA	NapA	NarG	NrfA
Abyssisolibacter	0	0	0	0	0	0	0	0	0	0	0	0	0	0	0	0	0	0	0	0	0	0.147575	0	0	0	0	0	0	0	0	0	0	0	0	0	0	0	0	0
Acetanaerobacterium	0	0	0	0	0	0	0	0	0	0	0	0	0	0	0	0	0	0	0	0	0	0	0	0	0	0	0	0	0.321274	0	0	0	0	0	0	0	0	0	0
Acetatifactor	0	0	0	0	0	0	0	0	0	0	0	0	0	0	0	0	0	0	0	0	0	0	0	0.353395	0	0	0	0	0	0	0	0	0	0	0	0	0	0	0
Acetitomaculum	0	0	0	0	0	0	0	0	0	0	0	0	0	0	0	0	0	0	0	0	0	0	0	0	0	0	0	1.62537	0.0524689	0	0	0.550505	0	0	0	0	0	0	0
Acetivibrio	0	0	0	0	0	0	0	0	0	0	0	0	0	0	0	0	0	0	0	0	0	0.0546371	0	0.03401	0	0	0	0	0.504444	0	0	0	0	0	0	0	0	0	0
Acetobacterium	0	0	0	0	0	0	0	0	0	0	0	0	0	0	0	0	0	0	0	0	0	0.109926	0.539278	0	0	0	0	0	0.0201586	0	0	0	0	0	0	0	0	0	0
Acholeplasmatales_norank	0	0	0	0	0	0	0	0	0	0	0	0	0	0	0	0	0	0	0	0	0	0.155173	0	0.34423	0	0	0.478516	0	1.0611	0	0	0	0	0	0	0	0	0	0
Acidaminococcaceae_norank	0	0	0	0	0	0	0	0	0	0	0	0	0	0	0.183023	0	0	0	0	0	0	0	0	0	0	0	0	0	0	0	0	0	0	0	0	0	0	0	0
Acidaminococcus	0	0	0	0	0	0	0	0	0	0	0	0	0	0	0	0	0	0	0	0	0	0.0863599	0	0.11359	0	0	0.0468926	0	0.179815	0	0	0	0	0	0	0	0	0	0
Acidiphilium	0	0	0	0	0	0	0	0	0	0	0	0	0	0	0	0	0	0	0	0	0	0	0	0	0	0	0.112987	0	1.95482	0	0	0	0	0	0	0	0	0	0
Acinetobacter	0	0	0	0	0	0	0	0	0	0	0	0	0	0	0	0	0	0	0	0.0216932	0	0	0	0	0	0	0	0	0	0	0	0	0	0	0	0	0	0	0
Acutalibacter	0	0	0	0	0	0	0	0	0	0	0	0	0	0	0	0	0	0	0	0	0	0.0693	0	3.87308	0	0	18.5604	0	0.517256	0	0	0	0	0	0	0	0	0	0
Adlercreutzia	0	0	0	0	0	0	0	0	0	0	0	0	0	0	0	0	0	0	0	0	0	0	0	0	0	0	0	0	0	0	0	0	0	0	0	0	0.0965398	0	0
Agathobacter	0	0	0	0	0	0	0	0	0	0	0	0	0	0	0	0	0	0	0	0	0	0	0	0	0	0	0	0	0	0.274777	0	0	0	0	0	0	0	0	0
Agathobaculum	0	0	0	0	0	0	0	0	0	0	0	0	0	0	0	0	0	0	0	0	0	0	0	0.0682541	0	0	0	0	0	0	0	0	0	0	0	0	0	0	0
Akkermansia	0	0	0	0	0	0.476978	0	0	0	0	0	0	0	0	0	0	0	0	0	0	0	0	0	0	0	0	0	0	0.12508	0	0	0	0	0	0	0	0	0	0
Alistipes	0	0	0	0	0	0	0	0	0	0	0	0	0	0	0	0	0	0	0	0	0	0.0268008	0	8.36156	0	0	0	0	0.134658	0	0	0	0	0	18.241	0	0	0	0
Alkalibaculum	0	0	0	0	0	0	0	0	0	0	0	0	0	0	0	0	0	0	0	0	0	0	0	0	0	0	0	0	0.0588622	0	0	0.0105973	0	0	0	0	0	0	0
Alkaliphilus	0	0	0	0	0	0	0	0	0	0	0	0	0	0	0	0	0	0	0	0	0	0	0	0	0	0	0	0	0.0605029	0	0	0	0	0	0	0	0	0	0
Alloprevotella	0	0	0	0	0	0	0	0	0	0	0	0	0	0	0	0	0	0	0	0	0	0	0	0	0	0	0	0	0	0	0	0	0	0	0.219889	0	0	0	0
Anaerobacterium	0	0	0	0	0	0	0	0	0	0	0	0	0	0	0.0760884	0	0	0	0	0	0	0	0	0	0	0	0	0	0.0571152	0	0	0	0	0	0	0	0	0	0
Anaerobium	0	0	0	0	0	0	0	0	0	0	0	0	0	0	0	0	0	0	0	0	0	0.0186993	0	0	1.96069	0	0	0	0.171956	0	0	0	0	0	0	0	0	0	0
Anaerobutyricum	0	0	0	0	0	0	0	0	0	0	0	0	0	0	0	0	0	0	0	0	0	0	0	0	0	0	0	0	0.229726	0	0	0	0	0	0	0	0	0	0
Anaerocolumna	0	0	0	0	0	0	0	0	0	0	0	0	0	0	0	0	0	0	0	0	0	1.14147	0	0.0611071	1.38139	0	0	0	2.36533	0	0	0	0	0	0	0	0	0	0
Anaerofilum	0	0	0	0	0	0	0	0	0	0	0	0	0	0	0	0	0	0	0	0	0	0	0	0.0289281	0	0	0	0	0.0680845	0	0	0	0	0	0	0	0	0	0
Anaeromassilibacillus	0	0	0	0	0	0	0	0	0	0	0	0	0	0	0	0	0	0	0	0	0	2.073	0	0	0.0976542	0	0	0	0.61498	0	0	0	0	0	0	0	0	0	0
Anaeroplasma	0	0	0	0	0	0	0	0	0	0	0	0	0	0	0	0	0	0	0	0	0	0.167489	0	0	0	0	0	0	1.38125	0	0	0	0	0	0	0	0	0	0
Anaerorhabdus	0	0	0	0	0	0	0	0	0	0	0	0	0	0	0	0	0	0	0	0	0	0.0248106	0	0	0	0	0	0	0.0997288	0	0	0	0	0	0	0	0	0	0
Anaerosacchariphilus	0	0	0	0	0	0	0	0	0	0	0	0	0	0	0.026211	0	0	0	0	0	0	0	0	0	0	0	0	0	0	0	0	0	0	0	0	0	0	0	0
Anaerostipes	0	0	0	0	0	0	0	0	0	0	0	0	0	0	0	0	0	0	0	0	0.0151087	0.0285178	0	0.0244311	0	0	0	0	0.300826	0	0.0221794	0	0	0	0	0	0	0	0
Anaerotignum	0	0	0	0	0	0	0	0	0	0	0	0	0	0	0	0	0	0	0	0	0.246523	0	0	0	0	0	0	0	0	0	0	0	0	0	0	0	0	0	0
Anaerotruncus	0	0	0	0	0	0	0	0	0	0	0	0	0	0	0	0	0	0	0	0	0.0173818	0.760834	0	1.62175	0	0	0	0	2.85935	0	0	0	0	0	0	0	0	0	0
Anaerovibrio	0	0	0	0	0	0	0	0	0	0	0	0	0	0	0	0.623969	0	0	0	0.132709	0	0	0	0	0	0	0	0	0	0	0	0	0	0	0	0	0	0	0
Anaerovorax	0	0	0	0	0	0	0	0	0	0	0	0	0	0	0.296217	0	0	0	0	0	0	0	0	0	0	0	0	0	0.0535254	0	0	0	0	0	0	0	0	0	0
Andreesenia	0	0	0	0	0	0	0	0	0	0	0	0	0	0	0	0	0	0	0	0	0.00546981	0	0	0	0	0	0	0	0	0	0	0	0	0	0	0	0	0	0
Angelakisella	0	0	0	0	0	0	0	0	0	0	0	0	0	0	0	0	0	0	0	0	0	0.490737	0	0.0840705	0	0	0	0	0.191795	0	0	0	0	0	0	0	0	0	0
Asaccharobacter	0	0	0	0	0	0	0	0.0363646	0	0	0	0	0	0	0	0	0	0	0	0	0	0	0	0	0	0	0	0	0	0	0	0	0	0	0	0	0.0425881	0	0
Azospirillum	0	0	0	0	0	0	0	0	0	0	0	0	0	0	0	0	0	0	0	0	0	0.176415	0	0.215641	0	0	0	0	0.0212976	0	0	0	0	0	0	0	0	0	0
Bacilliculturomica	0	0	0	0	0	0	0	0	0	0	0	0	0	0	0	0	0	0	0	0	0.0349073	0	0	0	0	0	0	0	0	0	0	0	0	0	0	0	0	0	0
Bacillus	0	0	0	0	0	0	0	0	0	0	0	0	0	0	0	0	0	0	0	0.0502821	0	0	0	0	0	0	0	0	0	0	0	0	0	0	0	0	0	0	0
Bacteria_norank	0	0	0	0	0	0	0	0	0	0	0	0	0	0	0.0203256	0	0	0	0	0	0.0348738	15.1544	0	6.6261	0	0.107363	0	3.13622	37.2869	0.00510769	0	0	0	0	20.3171	0	0	0	0
Bacteroidaceae_norank	0	0	0	0	0	0	0	0	0	0	0	0	0	0	0	0	0	0	0	0	0	0	0	0	0	0	0	0	0	0	0	0	0	0	1.23671	0	0	0	0
Bacteroidales_norank	0	0	0	0	0	0	0	0	0	0	0	0	0	0	0	0	0	0	0	0	0	0	0	0	0	0	0	0	0.0116978	0	0	0	0	0	32.377	0	0	0	0
Bacteroides	0	0	0	0	0	0	0	0.0161258	0	0	0	0	0	0	0	0	0	0	0	0	0	0.885442	0	6.33683	0	0	0	0	14.5717	0	0	0	0	0	45.9311	0	0	0	3.02274
Bacteroidetes_norank	0	0	0	0	0	0	0	0	0	0	0	0	0	0	0	0	0	0	0	0	0	5.63032	0	0	0	0	0	0	6.67436	0	0	0	0	0	8.4557	0	0	0	0.0505233
Bacteroidia_norank	0	0	0	0	0	0	0	0	0	0	0	0	0	0	0	0	0	0	0	0	0	21.1672	0	0	0	0	0	0	0.0120487	0	0	0	0	0	0.307237	0	0	0	0.020415
Bariatricus	0	0	0	0	0	0	0	0	0	0	0	0	0	0	0	0	0	0	0	0	0.211275	0.0934857	0	0	0	0	0	0	0.0156302	0	0	0	0	0	0	0	0	0	0
Barnesiella	0	0	0	0	0	0	0	0	0	0	0	0	0	0	0	0	0	0	0	0	0	0	0	0	0	0	0	0	0	0	0	0	0	0	0.734723	0	0	0	0
Beduini	0	0	0	0	0	0	0	0	0	0	0	0	0	0	0	0	0	0	0	0	0	0	0	0.0242297	0	0	0	0	0	0	0	0	0	0	0	0	0	0	0
Blautia	0	0	0	0	0	0	0	0	0	0	0	0	0	0	0	0	0	0	0	0.0282607	2.12426	0.201249	0.20338	0	0	0	0	2.17198	0.430088	0.0410591	0.268677	0.0108372	0	0	0	0	0	0	0
Brachyspira	0	0	0	0	0	0	0	0	0	0	0	0	0	0	0	0	0	0	0	0	0	0	0	0	0	0	0	0	0.525182	0	0	0	0	0	0	0	0	0	0
Bradyrhizobium	0	0	0	0	0	0	0	0	0	0	0	0	0	0	0	0	0	0	0	0	0	0	0	0	0	0	0	0	0	0	0	0	0	0	0	0	0.164417	0	0
Butyricimonas	0	0	0	0	0	0	0	0	0	0	0	0	0	0	0	0	0	0	0	0	0	0	0	0	0	0	0	0	0.0634909	0	0	0	0	0	0	0	0	0	0
Butyrivibrio	0	0	0	0	0	0	0	0	0	0	0	0	0	0	2.18524	0	0	0	0	0	0	4.2947	0	2.49822	0	0.104005	0	0	3.38229	2.00998	0	0.931336	0	0	0	0	0	0	0
Caldanaerobacter	0	0	0	0	0	0	0	0	0	0	0	0	0	0	0	0	0	0	0	0	0	0	0	0	0	0	0	0	0.0110048	0	0	0	0	0	0	0	0	0	0
Caldanaerobius	0	0	0	0	0	0	0	0	0	0	0	0	0	0	0	0	0	0	0	0	0	0.203138	0	0	0	0	0	0	0.0153311	0	0	0	0	0	0	0	0	0	0
Caldicellulosiruptor	0	0	0	0	0	0	0	0	0	0	0	0	0	0	0	0	0	0	0	0	0	0.0944316	0	0	0	0	0	0	0.00817206	0	0	0	0	0	0	0	0	0	0
Caldisalinibacter	0	0	0	0	0	0	0	0	0	0	0	0	0	0	0	0	0	0	0	0	0	0.249106	0	0	0	0	0	0	0.00850562	0	0	0	0	0	0	0	0	0	0
Caldisalinibacter	0	0	0	0	0	0	0	0	0	0	0	0	0	0	0	0	0	0	0	0	0	0.249106	0	0	0	0	0	0	0.00850562	0	0	0	0	0	0	0	0	0	0
Caloramator	0	0	0	0	0	0	0	0	0	0	0	0	0	0	0	0	0.541922	0	0	0	0	0	0	0	0	0	0	0	0.187494	0	0	0	0	0	0	0	0	0	0
Caloranaerobacter	0	0	0	0	0	0	0	0	0	0	0	0	0	0	0	0	0	0	0	0	0	0.0980082	0	0	0	0	0	0	0.632616	0	0	0	0	0	0	0	0	0	0
Caminicella	0	0	0	0	0	0	0	0	0	0	0	0	0	0	0	0	0	0	0	0	0	0	0	0	0	0	0	0	0.0313259	0	0	0	0	0	0	0	0	0	0
Campylobacter	0	0	0.0866501	0	0	0	0	0	0	0	0	0	0	0	0	0	0	0	0	0	0	0	0	0	0	0	0	0	0	0	0	0	0.0559883	0	0	0	0.0459377	0	0.117416
Candidatus Borkfalkia	0	0	0	0	0	0	0	0	0	0	0	0	0	0	0	0	0	0	0	0	0	0.0636735	0	0	0	0	0	0	0.287457	0	0	0	0	0	0	0	0	0	0
Candidatus Galacturonibacter	0	0	0	0	0	0	0	0	0	0	0	0	0	0	0	0	0	0	0	0	0	0.184678	0	0	0	0	0	0	0	0	0	0.106918	0	0	0	0	0	0	0
Candidatus Gastranaerophilales_norank	0	0	0	0	0	0	0	0	0	0	0	0	0	0	0	0	0	0	0	0	0	0	0	0	0	0	0	0	0.225291	0	0	0	0	0	0	0	0	0	0
Candidatus Melainabacteria_norank	0	0	0	0	0	0	0	0	0	0	0	0	0	0	0	0	0	0	0	0	0	0	0	0	0	0	0	0	0.275045	0	0	0	0	0	0	0	0	0	0
Candidatus Methanoplasma	0	0	0	0	0	0	0	0	0	0	0	0	0	0	0	0	0	0	0	0	0	0	0	0	0	0	0	0	0	0	0	0	0	0	0	0.0569693	0	0	0
Candidatus Nomurabacteria_norank	0	0	0	0	0	0	0	0	0	0	0	0	0	0	0	0	0	0	0	0	0	0.122411	0	0	0	0	0	0	0.0500001	0	0	0	0	0	0	0	0	0	0
Candidatus Soleaferrea	0	0	0	0	0	0	0	0	0	0	0	0	0	0	0	0	0	0	0	0	0	0.0999284	0	0	0	0	0	0	0.888054	0	0	0	0	0	0	0	0	0	0
Caproiciproducens	0	0	0	0	0	0	0	0	0	0	0	0	0	0	0	0	0	0	0	0	0	0	0	0	0	0	0	0	0.132495	0	0	0	0	0	0	0	0	0	0
Catabacter	0	0	0	0	0	0	0	0	0	0	0	0	0	0	0	0	0	0	0	0	0	0	0	0	0	0	0	0	0.00658425	0	0	0	0	0	0	0	0	0	0
Cellulosilyticum	0	0	0	0	0	0	0	0	0	0	0	0	0	0	0	0	0	0	0	0	0	0	0	0	0	0	0	0	0.232079	0	0	0	0	0	0	0	0	0	0
Christensenella	0	0	0	0	0	0	0	0	0	0	0	0	0	0	0.463274	0	0	0	0	0	0	0.10941	0	0	0	0	0	0	0.473428	0	0	0	0	0	0	0	0	0	0
Cloacibacillus	0	0	0	0	0	0	0	0	0	0	0	0	0	0	0	0	0	0	0	0	0	0.0441704	0	0	0	0	0	0	0.155387	0	0	0	0	0	0	0	0	0	0
Clostridia_norank	0	0	0	0	0	0	0	0	0	0	0	0	0	0	1.2215	0	2.25672	0	0	0.0641802	1.22112	3.59486	0	2.20847	0.642331	0	0	1.29673	21.144	0	0	0	0	0	0	0	0	0	0
Clostridiaceae_norank	0	0	0	0	0	0	0	0	0	0	0	0	0	0	0	0	0.0796236	0	0	0.195152	0	1.38607	0	0.173629	0	0	0.0290704	0.525939	1.13669	0	0	0.388668	0	0	0	0	0	0	0
Clostridiales Family XIII. Incertae Sedis_norank	0	0	0	0	0	0	0	0	0	0	0	0	0	0	0	0	0	0	0	0	0.0348931	0.950561	0	0.844696	0	0	0	0	1.37418	0	0	0	0	0	0	0	0	0	0
Clostridiales_norank	0	0	0	0	0	0	0	0	0	0	0	0	0	0	0.114847	0	6.26119	0	0	2.72558	0.831825	56.9386	0.0383544	37.4753	0.0476031	0	3.27882	43.8277	64.5087	0.414542	0	4.67446	0	2.7139	0	0	0	0	0
Clostridiisalibacter	0	0	0	0	0	0	0	0	0	0	0	0	0	0	0	0	0	0	0	0	0	0.10806	0	0	0	0	0	0	0	0	0	0	0	0	0	0	0	0	0
Clostridioides	0	0	0	0	0	0	0	0	0	0	0	0	0	0	0	0	0	0	0	0	0.0265975	0	1.46703	0	0	0	0	0.0555169	0	0	0	0	0	0	0	0	0	0	0
Clostridium	0	0	0	0	0	0	0	0	0	0	0	0	0	0	0.12162	0	0.0534091	0	0	1.1532	1.3424	22.7537	0	6.0179	0.277446	0	1.69029	1.57514	56.426	0.322338	0.227752	0.162361	0	0	0	0	0	0	0
Colidextribacter	0	0	0	0	0	0	0	0	0	0	0	0	0	0	0	0	0	0	0	0	0	0	0	0	0	0	0	0	1.05685	0	0	0	0	0	0	0	0	0	0
Collinsella	0	0	0	0	0	0	0	0	0	0	0	0	0	0	0	0	0	0	0	0	0	0	0	0	0	0	0	0	0	0	0	0	0.0340114	0	0	0	0	0	0
Coprobacillus	0	0	0	0	0	0	0	0	0	0	0	0	0	0	0	0	0	0	0	0	0	0.0750186	0	0	0	0	0	0	1.6453	0	0	0	0	0	0	0	0	0	0
Coprococcus	0	0	0	0	0	0	0	0	0	0	0	0	0	0	0	0	0	0	0	0	0.31521	0.621378	0	0	0.139774	0	0	0	0.973573	0	0	0	0	0	0	0	0	0	0
Coriobacteriaceae_norank	0	0	0	0	0	0	0	0.0209306	0	0.0515228	0	0	0	0	0	0	0	0	0	0	0	0	0	0.0294018	0	0	0	0	0	0	0.012342	0.0708426	0	0	0	0	0	0	0
Coriobacteriales_norank	0	0	0	0	0	0	0	0	0	0	0	0	0	0	0	0	0	0	0	0	0.0496964	0.396945	0	0.0536251	0	0	0	0	0.898172	0	0	0	0	0	0	0	0	0	0
Crassaminicella	0	0	0	0	0	0	0	0	0	0	0	0	0	0	0	0	0	0	0	0	0	0.0340475	0	0	0	0	0	0	0	0	0	0	0	0	0	0	0	0	0
Cuneatibacter	0	0	0	0	0	0	0	0	0	0	0	0	0	0	0	0	0	0	0	0	0.82703	0	0	0	0	0	0	0	0	0	0	0	0	0	0	0	0	0	0
Cuneatibacter	0	0	0	0	0	0	0	0	0	0	0	0	0	0	0	0	0	0	0	0	0.82703	0	0	0	0	0	0	0	0	0	0	0	0	0	0	0	0	0	0
Cyanobacteria_norank	0	0	0	0	0	0	0	0	0	0	0	0	0	0	0	0	0	0	0	0	0	0	0	0	0	0	0	0	0.0282434	0	0	0	0	0	0	0	0	0	0
Cyanobacteria_norank	0	0	0	0	0	0	0	0	0	0	0	0	0	0	0	0	0	0	0	0	0	0	0	0	0	0	0	0	0.0282434	0	0	0	0	0	0	0	0	0	0
Dehalobacter	0	0	0	0	0	0	0	0	0	0	0	0	0	0	0	0	0	0	0	0	0	0	0	0	0	0	0	0	0.105104	0	0	0	0	0	0	0	0	0	0
Denitrobacterium	0	0	0	0	0	0	0	0	0	0	0	0	0	0	0	0	0	0	0	0	0	0	0	0	0	0	0	0	0	0	0	0	0	0	0	0	0.233272	0	0
Desulfobulbus	0	0	0	0.0708584	0	0	0	0	0	0	0	0	0	0	0	0	0	0	0	0	0	0	0	0	0	0	0	0	0	0	0.0223154	0	0	0	0	0	0	0	0
Desulfovibrio	0	0.0386358	0.42495	0	0	0	0	0	0	0	0	0	0	0.336652	0.0387995	0	0	0	0	0.0206118	0	0	0	0.0594842	0	0	0	0	0	0	0.56774	0	0	0.424799	0.100894	0	0.236714	0	0.234983
Dethiosulfatibacter	0	0	0	0	0	0	0	0	0	0	0	0	0	0	0	0	0	0	0	0	0	0	0	0	0	0	0	0	0.0154349	0	0	0	0	0	0	0	0	0	0
Dorea	0	0	0	0	0	0	0	0	0	0	0	0	0	0	0	0	0	0	0	0	0.888818	0.383655	0	0.278872	0	0	0	0	0.4435	0	0	0	0	0	0	0	0	0	0
Dysgonomonas	0	0	0	0	0	0	0	0	0	0	0	0	0	0	0	0	0	0	0	0	0	0	0	0	0	0	0	0	0	0	0	0	0	0	0.39679	0	0	0	0.0325604
Dysosmobacter	0	0	0	0	0	0	0	0	0	0	0	0	0	0	0	0	0	0	0	0	0	0	0	0	0	0	0	0	1.40724	0	0	0	0	0	0	0	0	0	0
Eggerthella	0	0	0	0	0	0	0	0.117195	0	0.0104142	0	0	0	0	0.122843	0	0	0	0	0	0	0	0	0	0	0	0	0	0	0	0	0	0.047307	0	0	0	0	0	0
Eggerthellaceae_norank	0	0	0	0	0	0	0	0.284565	0	0	0	0	0	0	0.295665	0	0	0	0	0	0.233892	0	0	0	0	0	0	0	0	0	0	0	0	0	0	0	0	0	0
Eikenella	0	0	0	0	0	0	0	0	0	0	0	0	0	0	0	0	0	0	0	0	0	0	0	0	0	0	0	0	0	0	0	0	0	0	0	0	0	0.0325119	0
Eisenbergiella	0	0	0	0	0	0	0	0	0	0	0	0	0	0	0.0780016	0	0	0	0	0	0	0	0	1.36107	0	0	0	0	0.0147998	0	0	0	0	0	0	0	0	0	0
Ellagibacter	0	0	0	0	0	0	0	0	0	0.0398156	0	0	0	0	0	0	0	0	0	0	0	0	0	0	0	0	0	0	0	0	0	0	0	0	0	0	0	0	0
Elusimicrobia_norank	0	0	0	0	0	0	0	0	0	0	0	0	0	0	0	0	0	0	0	0	0	0	0	0	0	0	0	0	0.0100726	0	0	0	0	0	0	0	0	0	0
Elusimicrobium	0	0	0	0	0	0	0	0	0	0	0	0	0	0	0	0	0	0	0	0	0	0.0572695	0	0	0	0	0	0	0.0586192	0	0	0	0	0	0	0	0	0	0
Emergencia	0	0	0	0	0	0	0	0	0	0	0	0	0	0	0	0	0	0	0	0	0.522044	0.29388	0	0.0886209	0	0	0	0	0.994704	0	0	0	0	0	0	0	0	0	0
Endomicrobium	0	0	0	0	0	0	0	0	0	0	0	0	0	0	0	0	0	0	0	0	0	0	0	0	0	0	0	0	0.146474	0	0	0	0	0	0	0	0	0	0
Enterorhabdus	0	0	0	0	0	0	0	0.0473825	0	0	0	0	0	0	0.0850986	0	0	0	0	0	0	0	0	0	0	0	0	0	0	0	0	0	0	0	0	0	0.194016	0	0
Enteroscipio	0	0	0	0	0	0	0	0.0168663	0	0	0	0	0	0	0	0	0	0	0	0	0	0	0	0	0	0	0	0	0	0	0	0	0	0	0	0	0	0	0
Erysipelatoclostridium	0	0	0	0	0	0	0	0	0	0	0	0	0	0	0	0	0	0	0	0	0	0.172571	0	0	0	0	0	0	0	0	0	0	0	0	0	0	0	0	0
Erysipelotrichaceae_norank	0	0	0	0	0	0	0	0	0	0	0	0	0	0	0	0	0	0	0	0	0	0.306526	0	0.0543942	0	0	0	0	0.72215	0	0	0	0	0	0	0	0	0	0
Erysipelotrichaceae_norank	0	0	0	0	0	0	0	0	0	0	0	0	0	0	0	0	0	0	0	0	0	0.306526	0	0.0543942	0	0	0	0	0.72215	0	0	0	0	0	0	0	0	0	0
Erysipelotrichia_norank	0	0	0	0	0	0	0	0	0	0	0	0	0	0	0	0	0	0	0	0	0	0.0131979	0	0	0	0	0	0	0.0341094	0	0	0	0	0	0	0	0	0	0
Erysipelotrichia_norank	0	0	0	0	0	0	0	0	0	0	0	0	0	0	0	0	0	0	0	0	0	0.0131979	0	0	0	0	0	0	0.0341094	0	0	0	0	0	0	0	0	0	0
Escherichia	0	0	0	0	0	0	0	0	0	0	0	0	0.249755	0	0	0	0	0	0	0	0	0	0	0	0	0	0	0	0	0	0	0	0.56339	0	0	0	0.127229	0.119626	0
Ethanoligenens	0	0	0	0	0	0	0	0	0	0	0	0	0	0	0	0	0	0	0	0	0.0690726	0	0	0	0	0	0	0	0	0	0	0	0	0	0	0	0	0	0
Eubacteriaceae_norank	0	0	0	0	0	0	0	0	0	0	0	0	0	0	0.196755	0	0	0	0	0	0	0.250963	0	0	0	0	0	0	1.12836	0	0	0	0	0	0	0	0	0	0
Eubacteriaceae_norank	0	0	0	0	0	0	0	0	0	0	0	0	0	0	0.196755	0	0	0	0	0	0	0.250963	0	0	0	0	0	0	1.12836	0	0	0	0	0	0	0	0	0	0
Eubacterium	0	0	0	0	0	0	0	0	0	0	0	0	0	0	0.960463	0	0	0	0	0	2.52417	14.2961	0	0.917259	0	0	2.59628	0.10581	17.8005	1.21808	0.257947	0.113179	0	0	0	0	0	0	0
Evtepia	0	0	0	0	0	0	0	0	0	0	0	0	0	0	0	0	0	0	0	0	0	0.881296	0	0	0	0	0	0	0	0	0	0	0	0	0	0	0	0	0
Extibacter	0	0	0	0	0	0	0	0	0	0	0	0	0	0	0	0	0	0	0	0	0	0.143443	0	0.258501	0	0	0	0	0	0	0	0	0	0	0	0	0	0	0
Faecalibacterium	0	0	0	0	0	0	0	0	0	0	0	0	0	0	0	0	0	0	0	0	0	0	0	0.150398	0	0	0	0	0.192108	0	0	0	0	0	0	0	0	0	0
Faecalicatena	0	0	0	0	0	0	0	0	0	0	0	0	0	0	0	0	0	0	0	0	0	0.905602	0	0	0	0	0	0	0.773664	0.0226419	0	0	0	0	0	0	0	0	0
Fibrobacter	0	0	0	0	0	0	0	0	0	0	0	0	0	0	0	0	0	0	0	0	0	0	0	0	0	0	0	0	0	2.45435	2.09601	0	0	0	0	0	0	0	0
Firmicutes_norank	0	0	0	0	0	0	0	0	0	0	0	0	0	0	0	0	0	0	0	2.47536	1.75747	13.8231	0	9.6462	0.0131324	0	0.0496894	71.5541	23.155	0	0	0.670632	0	0	0	0	0	0	0
Flavonifractor	0	0	0	0	0	0	0	0	0	0	0	0	0	0	0	0	0	0	0	0.160732	0.502602	0.92474	0	0.304392	0.057218	0	0	0	0.508729	0	0	0	0	0	0	0	0	0	0
Flintibacter	0	0	0	0	0	0	0	0	0	0	0	0	0	0	0	0	0	0	0	0	0	0	0	0	0	0	0	0	0.399312	0	0	0	0	0	0	0	0	0	0
Fournierella	0	0	0	0	0	0	0	0	0	0	0	0	0	0	0	0	0	0	0	0	0	0.0359845	0	0	0	0	0	0	0	0	0	0	0	0	0	0	0	0	0
Frisingicoccus	0	0	0	0	0	0	0	0	0	0	0	0	0	0	0	0	0	0	0	0	0	0	0	0.600867	0	0	0	0	0	0	0	0	0	0	0	0	0	0	0
Fusicatenibacter	0	0	0	0	0	0	0	0	0	0	0	0	0	0	0	0	0	0	0	0	0	0	0	0	0	0	0	0.0326429	0	0	0	0	0	0	0	0	0	0	0
Fusobacterium	0	0	0	0	0	0	0	0	0	0	0	0	0	0	0	0	0	0	0	0	0	0	0	0.402099	0	0	0	0	0.217448	0	0	0	0	0	0	0	0	0	0
Galactobacillus	0	0	0	0	0	0	0	0	0	0	0	0	0	0	0	0	0	0	0	0	0	0	0	0	0	0	0	0	0.0844406	0	0	0	0	0	0	0	0	0	0
Gammaproteobacteria_norank	0	0	0	0	0	0	0	0	0	0	0	0	0	0	0	0	0	0	0	0	0	0	0	0	0	0	0	0	0	0	0	0	0	0	0.0388401	0	0	0	0
Gemmiger	0	0	0	0	0	0	0	0	0	0	0	0	0	0	0	0	0	0	0	0	0	1.64671	0	0	0	0	0	0	0.536941	0	0	0	0	0	0	0	0	0	0
Geosporobacter	0	0	0	0	0	0	0	0	0	0	0	0	0	0	0	0	0	0	0	0	0	0	0	0	0	0	0	0	0.0124377	0	0	0	0	0	0	0	0	0	0
Gordonibacter	0	0	0	0	0	0	0	0.0362759	0	0.0224191	0	0	0	0	0.0504777	0	0	0	0	0	0	0	0	0	0	0	0	0	0	0	0	0	0.0317474	0	0	0	0.0525594	0	0
Gracilibacter	0	0	0	0	0	0	0	0	0	0	0	0	0	0	0	0	0	0	0	0	0	0	0	0	0	0	0	0	0.0329863	0	0	0	0	0	0	0	0	0	0
Haloplasma	0	0	0	0	0	0	0	0	0	0	0	0	0	0	0	0	0	0	0	0	0	0	0	0	0	0	0	0	0.0201989	0	0	0	0	0	0	0	0	0	0
Halothermothrix	0	0	0	0	0	0	0	0	0	0	0	0	0	0	0	0	0	0	0	0	0	0	0	0	0	0	0	0	0.0329824	0	0	0	0	0	0	0	0	0	0
Harryflintia	0	0	0	0	0	0	0	0	0	0	0	0	0	0	0	0	0	0	0	0	0	0.0838807	0	0.116165	0	0	0	0	0.0498036	0	0	0	0	0	0	0	0	0	0
Hathewaya	0	0	0	0	0	0	0	0	0	0	0	0	0	0	0	0	0	0	0	0	1.23968	0	0	0	0	0	0	0	0	0	0	0	0	0	0	0	0	0	0
Helicobacter	0	0	0.0784097	0	0	0	0	0	0	0	0	0	0	0	0	0	0	0	0	0	0	0	0	0	0	0	0	0	0	0	0	0	0	0	0	0	0	0	0.0834408
Herbinix	0	0	0	0	0	0	0	0	0	0	0	0	0	0	0	0	0	0	0	0	0	0	0	0	0.0899879	0	0	0	0.529729	0	0	0	0	0	0	0	0	0	0
Holdemanella	0	0	0	0	0	0	0	0	0	0	0	0	0	0	0	0	0	0	0	0.0170554	0	0	0	0	0	0	0	0	0	0	0	0	0	0	0	0	0	0	0
Holdemania	0	0	0	0	0	0	0	0	0	0	0	0	0	0	0	0	0	0	0	0	0	0.320197	0	0	0	0	0	0	0.196679	0	0	0	0	0	0	0	0	0	0
Holophaga	0	0	0	0	0	0	0	0	0	0	0	0	0	0	0	0	0	0	0	0	0	0.0277848	0	0	0	0	0	0	0	0	0	0	0	0	0	0	0	0	0
Hungateiclostridium	0	0	0	0	0	0	0	0	0	0	0	0	0	0	0.257615	0	0	0	0	0	0	2.26427	0	0	0	0	0	0	1.88883	0	0	0	0	0	0	0	0	0	0
Hungatella	0	0	0	0	0	0	0	0	0	0	0	0	0	0	0	0	0	0	0	0	0	0.27244	0	0.0347102	0.0369009	0	0.0454418	0	0.430871	0.0255373	0	0	0	0	0	0	0	0	0
Hydrogenoanaerobacterium	0	0	0	0	0	0	0	0	0	0	0	0	0	0	0	0	0	0	0	0	0	0.604307	0	0.0347514	0	0	0	0	0.379916	0	0	0	0	0	0	0	0	0	0
Inediibacterium	0	0	0	0	0	0	0	0	0	0	0	0	0	0	0	0	0	0	0	0	0	0.0745439	0	0	0	0	0	0	0	0	0	0	0	0	0	0	0	0	0
Intestinimonas	0	0	0	0	0	0	0	0	0	0	0	0	0	0	0	0	0	0	0	0	0	0.724169	0	0.0882674	0.0220427	0	0	0	0.119945	0	0	0.244194	0	0	0	0	0	0	0
Intestinimonas	0	0	0	0	0	0	0	0	0	0	0	0	0	0	0	0	0	0	0	0	0	0.724169	0	0.0882674	0.0220427	0	0	0	0.119945	0	0	0.244194	0	0	0	0	0	0	0
Kandleria	0	0	0	0	0	0	0	0	0	0	0	0	0	0	0	0	0	0	0	0	0	0.0582187	0	0	0	0	0	0	0.346743	0	0.0164618	0	0	0	0	0	0	0	0
Keratinibaculum	0	0	0	0	0	0	0	0	0	0	0	0	0	0	0	0	0	0	0	0	0.403231	0	0	0	0	0	0	0	0	0	0	0	0	0	0	0	0	0	0
Kineothrix	0	0	0	0	0	0	0	0	0	0	0	0	0	0	0	0	0	0	0	0	0.089588	0	0	0.0521246	0	0.0268901	0	0	0	0	0	0	0	0	0	0	0	0	0
Kingella	0	0	0	0	0	0	0	0	0	0	0	0	0	0	0	0	0	0	0	0	0	0	0	0	0	0	0	0	0	0	0	0	0	0	0	0	0	0.0166049	0
Lachnoanaerobaculum	0	0	0	0	0	0	0	0	0	0	0	0	0	0	0	0	0	0	0	0	0	0	0	0	0	0	0	0	0	0	0.184955	0.0182669	0	0	0	0	0	0	0
Lachnoclostridium	0	0	0	0	0	0	0	0	0	0	0	0	0	0	0	0	0.0478138	0	0	0.102772	0.17986	3.84248	0.0522829	0.414772	0.535104	0	0.02621	1.11806	1.73346	0.28897	0.0280731	0.0145159	0	0	0	0	0	0	0
Lachnospira	0	0	0	0	0	0	0	0	0	0	0	0	0	0	0	0	0	0	0	0	0.511447	0	0	0	0	0	0	0	0	0.0068615	0	0	0	0	0	0	0	0	0
Lachnospiraceae_norank	0	0	0	0	0.0373534	0	0	0	0	0	0	0	0	0	4.39197	0	0	0	0	0	1.57923	32.9803	0	57.8621	1.10541	0.863208	1.72969	1.63996	65.71	2.00448	0.940636	4.16081	0	0	0	0	0	0	0
Lachnotalea	0	0	0	0	0	0	0	0	0	0	0	0	0	0	0	0	0	0	0	0	0	0	0	0	0.0414721	0	0	0	1.0518	0	0	0	0	0	0	0	0	0	0
Lactimicrobium	0	0	0	0	0	0	0	0	0	0	0	0	0	0	0	0	0	0	0	0	0	0.112462	0	0	0	0	0	0	0	0	0	0	0	0	0	0	0	0	0
Lactobacillus	0	0	0	0	0	0	0	0	0	0	0	0	0	0	0	0	0	0	0	0	0	0	0	0	0	0	0	0	0	0	0.0175448	0	0	0	0	0	0	0	0
Lactococcus	0	0	0	0	0	0	0	0	0	0	0	0	0	0	0	0	0	0	0	0	0	0	0	0	0	0	0	0	0.0162081	0	0	0	0	0	0	0	0	0	0
Lactonifactor	0	0	0	0	0	0	0	0	0	0	0	0	0	0	0	0	0	0	0	0	0	0	0	0	0	0	0	6.3811	0	0	0	0	0	0	0	0	0	0	0
Lawsonibacter	0	0	0	0	0	0	0	0	0	0	0	0	0	0	0	0	0	0	0	0	0	0	0	0	0	0	0	0	0.119864	0	0	0	0	0	0	0	0	0	0
Lentimicrobium	0	0	0	0	0	0	0	0	0	0	0	0	0	0	0	0	0	0	0	0	0	0	0	0	0	0	0	0	0.0469809	0	0	0	0	0	0	0	0	0	0
Lentisphaerae_norank	0	0	0	0	0	0	0	0	0	0	0	0	0	0	0	0	0	0	0	0	0	0	0	0	0	0	0	0	0.145176	0	0	0	0	0	0	0	0	0	0
Lentisphaeria_norank	0	0	0	0	0	0	0	0	0	0	0	0	0	0	0	0	0	0	0	0	0	0.0736145	0	0	0	0	0	0	0.339611	0	0	0	0	0	0	0	0	0	0
Longibaculum	0	0	0	0	0	0	0	0	0	0	0	0	0	0	0	0	0	0	0	0	0	0.242038	0	0.0683882	0	0	0	0	0	0	0	0	0	0	0	0	0	0	0
Lutispora	0	0	0	0	0	0	0	0	0	0	0	0	0	0	0	0	0	0	0	0	0	1.69803	0	0	0	0	0	0	0.101361	0	0	0	0	0	0	0	0	0	0
Mailhella	0	0	0.0133749	0	0	0	0	0	0	0	0	0	0	0	0	0	0	0	0	0.373397	0.100948	0.481055	0	0	0	0	0	0	0.486102	0	0	0	0	0.629514	0	0	0	0	0.591206
Mailhella	0	0	0.0133749	0	0	0	0	0	0	0	0	0	0	0	0	0	0	0	0	0.373397	0.100948	0.481055	0	0	0	0	0	0	0.486102	0	0	0	0	0.629514	0	0	0	0	0.591206
Maledivibacter	0	0	0	0	0	0	0	0	0	0	0	0	0	0	0	0	0	0	0	0	0	0.188607	0	0	0	0	0	0	0.0103444	0	0	0	0	0	0	0	0	0	0
Marasmitruncus	0	0	0	0	0	0	0	0	0	0	0	0	0	0	0	0	0	0	0	0	0	0.182247	0	0	0	0	0	0	1.56494	0	0	0	0	0	0	0	0	0	0
Marinilabilia	0	0	0	0	0	0	0	0	0	0	0	0	0	0	0	0	0	0	0	0	0	0	0	0	0	0	0	0	0	0	0	0	0	0	0.186803	0	0	0	0
Marinilabiliales_norank	0	0	0	0	0	0	0	0	0	0	0	0	0	0	0	0	0	0	0	0	0	0	0	0	0	0	0	0	0	0	0	0	0	0	0.21584	0	0	0	0
Marvinbryantia	0	0	0	0	0	0	0	0	0	0	0	0	0	0	0	0	0	0	0	0	0	0	0	0	0	0	0	0.122823	0	0	0	0	0	0	0	0	0	0	0
Massilibacillus	0	0	0	0	0	0	0	0	0	0	0	0	0	0	0	0	0	0	0	0	0	0.0341592	0	0	0	0	0	0	0	0	0	0	0	0	0	0	0	0	0
Massilicoli	0	0	0	0	0	0	0	0	0	0	0	0	0	0	0	0	0	0	0	0	0	0	0	0.185403	0	0	0	0	0	0	0	0	0	0	0	0	0	0	0
Massilimaliae	0	0	0	0	0	0	0	0	0	0	0	0	0	0	0	0	0	0	0	0	0	0.0975973	0	0.0158733	0	0	0	0	1.41839	0	0	0	0	0	0	0	0	0	0
Massilioclostridium	0	0	0	0	0	0	0	0	0	0	0	0	0	0	0	0	0	0	0	0	0.0857679	0	0	0.0352754	0	0	0	0	0	0	0	0	0	0	0	0	0	0	0
Mediterraneibacter	0	0	0	0	0	0	0	0	0	0	0	0	0	0	0	0	0	0	0	0	0.0684299	0	0	0	0	0	0	0	0	0	0	0	0	0	0	0	0	0	0
Megamonas	0	0	0	0	0.0127288	0	0	0	0	0	0	0	0	0	0	0	0	0	0	0	0	0	0	0	0	0	0	0	0	0	0	0	0	0	0	0	0	0	0
Megasphaera	0	0	0	0	0	0	0	0	0	0	0	0	0	0	0	0	0	0	0	0	0	0	0	0.118899	0	0	0	0	0	0	0	0	0	0	0	0	0	0	0
Methanobacteriales_norank	0	0	0	0	0	0	0	0	0.0269199	0	0.0256703	0	0	0	0	0	0	0	0	0	0	0	0	0	0	0	0	0	0	0	0	0	0	0	0.0864399	0.0330913	0	0	0
Methanobacterium	0	0	0	0	0	0	0	0	0	0	0	0	0	0	0	0	0	0.0243245	0.0459546	0	0	0	0	0	0	0	0	0	0	0	0	0	0	0	0	0.0332647	0	0	0
Methanobrevibacter	7.96426	0	0	0	0	0	0	0	11.6867	0	14.6467	0	0	0	0	0	0	10.9851	12.7061	0	0	0	0	0	0	0	0	0	0	0.0118317	0	0	0	0	13.7736	16.9435	0	0	0
Methanocorpusculum	0	0	0	0	0	0	0	0	0.197947	0	0	0	0	0	0.257009	0	0	0.204871	0	0	0	0	0	0	0	0	0	0	0	0	0	0	0	0	0.144546	0.190134	0	0	0
Methanomassiliicoccaceae_norank	0	0	0	0	0	0	0	0	0	0	0	0	0	0	0	0	0	0	0	0	0	0	0	0	0	0	0	0	0	0	0	0	0	0	0	0.0687601	0	0	0
Methanomassiliicoccales_norank	0	0	0	0	0	0	0	0	0	0	0.0749989	0	0	0	0	0	0	0	0	0	0	0	0	0	0	0	0	0.117853	0	0	0	0	0	0	0	0.0416462	0	0	0
Methanosphaera	0	0	0	0	0	0	0	0	0.0354295	0	0.1485	0	0	0	0	0	0	0	0.109503	0	0	0	0	0	0	0	0	0	0	0	0	0	0	0	0.0334992	0	0	0	0
Methylomusa	0	0	0	0	0	0	0	0	0	0	0	0	0	0	0	0	0	0	0	0	0	0.109256	0	0	0	0	0	0	0	0	0	0	0	0	0	0	0	0	0
Millionella	0	0	0	0	0	0	0	0	0	0	0	0	0	0	0	0	0	0	0	0	0	0	0	0	0	0	0	0	0	0	0	0	0	0	0.0374361	0	0	0	0
Mitsuokella	0	0	0	0	1.17724	0	0	0	0	0	0	0	0	0	0	0	0	0	0	0	0	0	0	0	0	0	0	0	0.032301	0	0.412765	0	0	0	0	0	0	0.518016	0.183092
Mobilibacterium	0	0	0	0	0	0	0	0	0	0	0	0	0	0	0	0	0	0	0	0	0	0.254996	0	0	0	0	0	0	0	0	0	1.99558	0	0	0	0	0	0	0
Mobilisporobacter	0	0	0	0	0	0	0	0	0	0	0	0	0	0	0	0	0	0	0	0	0	0.0159221	0	0	0	0	0	0	0.799895	0	0	0	0	0	0	0	0	0	0
Mogibacterium	0	0	0	0	0	0	0	0	0	0	0	0	0	0	0	0	0	0	0	0	0	0	0	0	0	0	0	0	0.242639	0	0	0	0	0	0	0	0	0	0
Mordavella	0	0	0	0	0	0	0	0	0	0	0	0	0	0	0	0	0	0	0	0	0	0	0	0.0208828	0	0	0	0	0	0	0	0	0	0	0	0	0	0	0
Mucispirillum	0	0	0	0	0	0	0	0	0	0	0	0	0	0	0	0	0	0	0	0	0	0	0	0	0	0	0	0	0	0	0	0	0	0	0	0	0.0680603	0	0
Muribaculaceae_norank	0	0	0	0	0	0	0	0	0	0	0	0	0	0	0	0	0	0	0	0	0	0	0	0	0	0	0	0	0	0	0	0	0	0	4.23962	0	0	0	0
Muribaculum	0	0	0	0	0	0	0	0	0	0	0	0	0	0	0	0	0	0	0	0	0	0.568551	0	0	0	0	0	0	0	0	0	0	0	0	31.152	0	0	0	0
Murimonas	0	0	0	0	0	0	0	0	0	0	0	0	0	0	0	0	0	0	0	0	0.134636	0	0	0.401282	0	0	0	0.226792	0	0	0	0	0	0	0	0	0	0	0
Mycolicibacterium	0	0	0	0	0	0	0.0939649	0	0	0	0	0.0492227	0	0	0	0	0	0	0	0	0	0	0	0	0	0	0	0	0	0	0	0	0	0	0	0	0	0	0
Neglecta	0	0	0	0	0	0	0	0	0	0	0	0	0	0	0	0	0	0	0	0	0	0.365004	0	0.434454	0	0	0	0	0.351937	0	0	0	0	0	0	0	0	0	0
Neisseria	0	0	0	0	0	0	0	0	0	0	0	0	0	0	0	0	0	0	0	0	0	0	0	0	0	0	0	0	0	0	0	0	0	0	0	0	0	0.0562618	0
Neobittarella	0	0	0	0	0	0	0	0	0	0	0	0	0	0	0	0	0	0	0	0	0	0.27226	0	0	0	0	0	0	0.0344074	0	0	0	0	0	0	0	0	0	0
Odoribacter	0	0	0	0	0	0	0	0	0	0	0	0	0	0	0	0	0	0	0	0	0	0	0	0	0	0	0	0	0.0896901	0	0	0	0	0	0	0	0	0	0
Olsenella	0	0	0	0	0	0	0	0	0	0	0	0	0	0	0	0	0	0	0	0	0	0	0	0.108321	0	0	0	0	0	0	0	0.126387	0	0	0	0	0	0	0
Opitutae_norank	0	0	0	0	0	0	0	0	0	0	0	0	0	0	0	0	0	0	0	0	0	0	0	0	0	0	0	0	0.0231693	0	0	0	0	0	0	0	0	0	0
Oribacterium	0	0	0	0	0	0	0	0	0	0	0	0	0	0	0	0	0	0	0	0	0.143033	0	0	0.0158944	0	0	0	0	0	0	0	0	0	0	0	0	0	0	0
Oscillibacter	0	0	0	0	0	0	0	0	0	0	0	0	0	0	0	0	0	0	0	0	8.75469	4.21911	0	3.70193	0	0	0	0	8.28509	0	0	0	0	0	0	0	0	0	0
Oscillospiraceae_norank	0	0	0	0	0	0	0	0	0	0	0	0	0	0	0	0	0	0	0	0	0.190265	0	0	0	0	0	0	0	0	0	0	0	0	0	0	0	0	0	0
Oxobacter	0	0	0	0	0	0	0	0	0	0	0	0	0	0	0	0	0	0	0	0	0	0	0	0	0	0	0	0	0.357729	0	0	0	0	0	0	0	0	0	0
Paludibacter	0	0	0	0	0	0	0	0	0	0	0	0	0	0	0	0	0	0	0	0	0	0	0	0	0	0	0	0	0.00636938	0	0	0	0	0	0.258852	0	0	0	0
Papillibacter	0	0	0	0	0	0	0	0	0	0	0	0	0	0	0	0	0	0	0	0	0	0.063507	0	0	0	0	0	0	0	0	0	0	0	0	0	0	0	0	0
Parabacteroides	0	0	0	0	0	0	0	0	0	0	0	0	0	0	0	0	0	0	0	0	0	0.0625323	0	3.4192	0	0	0	0	0.0784264	0	0	0	0	0	0.0173752	0	0	0	0
Paraeggerthella	0	0	0	0	0	0	0	0.0687904	0	0.177928	0	0	0	0	0	0	0	0	0	0	0	0	0	0	0	0	0	0	0	0	0	0	0	0	0	0	0.0500368	0	0.100765
Paramaledivibacter	0	0	0	0	0	0	0	0	0	0	0	0	0	0	0	0	0	0	0	0	0	0	0	0	0	0	0	0	1.65584	0	0	0	0	0	0	0	0	0	0
Paraprevotella	0	0	0	0	0	0	0	0	0	0	0	0	0	0	0	0	0	0	0	0	0	0	0	0	0	0	0	0	0	0	0	0	0	0	0.00933156	0	0	0	0
Parasporobacterium	0	0	0	0	0	0	0	0	0	0	0	0	0	0	0	0	0	0	0	0	0	0	0	0	0	0	0	0.251075	0	0	0	0.0219325	0	0	0	0	0	0	0
Parvibacter	0	0	0	0	0	0	0	0	0	0	0	0	0	0	0	0	0	0	0	0	0	0	0	0	0	0	0	0	0	0	0	0	0	0	0	0	0.088866	0	0
Peptococcaceae_norank	0	0	0	0	0	0	0	0	0	0	0	0	0	0	0	0	0	0	0	0	0	0	0	0	0	0	0	0.265955	0.0908803	0	0	0	0	0	0	0	0	0	0
Petroclostridium	0	0	0	0	0	0	0	0	0	0	0	0	0	0	0	0	0	0	0	0	0	2.41046	0	0	0	0	0	0	7.02968	0	0	0	0	0	0	0	0	0	0
Petroclostridium	0	0	0	0	0	0	0	0	0	0	0	0	0	0	0	0	0	0	0	0	0	2.41046	0	0	0	0	0	0	7.02968	0	0	0	0	0	0	0	0	0	0
Phascolarctobacterium	0	0	0	0	0	0	0	0	0	0	0	0	0	0	0	3.27095	0	0	0	3.05265	4.21125	0	0	0	0.357493	0	0	0	0	1.54334	0	0	0	0	0	0	0	0	0
Phycisphaerales_norank	0	0	0	0	0	0	0	0	0	0	0	0	0	0	0	0	0	0	0	0	0	0	0	0	0	0	0	0	0.045144	0	0	0	0	0	0	0	0	0	0
Porphyromonadaceae_norank	0	0	0	0	0	0	0	0	0	0	0	0	0	0	0	0	0	0	0	0	0	0.0164564	0	0	0	0	0	0	0	0	0	0	0	0	0.0584881	0	0	0	0
Porphyromonas	0	0	0	0	0	0	0	0	0	0	0	0	0	0	0	0	0	0	0	0	0	0	0	0	0	0	0	0	0	0	0	0	0	0	0.447469	0	0	0	2.23866
Prevotella	0	0	0	0	0	0	0	0	0	0	0	0	0	0	0	0	0	0	0	0	0	18.0478	0	0	0	0	0	0	4.40749	2.44925	0	0	0	0	64.0002	0	0	0	62.2554
Prevotellaceae_norank	0	0	0	0	0	0	0	0	0	0	0	0	0	0	0	0	0	0	0	0	0	0	0	0	0	0	0	0	0	0	0	0	0	0	1.6331	0	0	0.0401096	0
Prolixibacteraceae_norank	0	0	0	0	0	0	0	0	0	0	0	0	0	0	0	0	0	0	0	0	0	0	0	0	0	0	0	0	0.0455262	0	0	0	0	0	0	0	0	0	0
Proteiniborus	0	0	0	0	0	0	0	0	0	0	0	0	0	0	0	0	0	0	0	0	0	0	0	0	0	0	0	0	0.040525	0	0	0	0	0	0	0	0	0	0
Proteobacteria_norank	0	0	0	0	0	0	0	0	0	0	0	0	0	0	0	0	0	0	0	0	0	0	0	0	0	0	0	0	0.0257744	0	0	0	0	0	0	0	0	0	0
Pseudobutyrivibrio	0	0	0	0	0	0	0	0	0	0	0	0	0	0	1.47884	0	0	0	0	0	0	0	0	0.175461	0	0	0	0	0	0	0.541125	0.132087	0	0	0	0	0	0	0
Pseudoclostridium	0	0	0	0	0	0	0	0	0	0	0	0	0	0	0	0	0	0	0	0	0	0.133211	0	0	0	0	0	0	0.00573262	0	0	0	0	0	0	0	0	0	0
Pseudoflavonifractor	0	0	0	0	0	0	0	0	0	0	0	0	0	0	0	0	1.97358	0	0	0	0.232766	0.325628	0	0	0.0587659	0	0	0	1.10268	0.0403849	0	0	0	0	0	0	0	0	0
Pygmaiobacter	0	0	0	0	0	0	0	0	0	0	0	0	0	0	0	0	0	0	0	0	0	0	0	0	0	0	0	0	0.16137	0	0	0	0	0	0	0	0	0	0
Pyramidobacter	0	0	0	0	0	0	0	0	0	0	0	0	0	0	0	0	0	0	0	0	0.104437	0	0	0	0	0	0	0	0.302344	0	0	0	0	0	0	0	0	0	0
Raoultibacter	0	0	0	0	0	0	0	0	0	0.0414832	0	0	0	0	0.0479093	0	0	0	0	0	0	0	0	0	0	0	0	0	0	0	0	0	0	0	0	0	0.0268048	0	0
Rikenella	0	0	0	0	0	0	0	0	0	0	0	0	0	0	0	0	0	0	0	0	0	0	0	0	0	0	0	0	0	0	0	0	0	0	0.0249051	0	0	0	0
Rikenellaceae_norank	0	0	0	0	0	0	0	0	0	0	0	0	0	0	0	0	0	0	0	0	0	0	0	0	0	0	0	0	0.0274135	0	0	0	0	0	0.238493	0	0	0	0
Robinsoniella	0	0	0	0	0	0	0	0	0	0	0	0	0	0	0	0	0	0	0	0	0.0173048	0	0	0	0	0	0	0.202304	0	0	0	0	0	0	0	0	0	0	0
Romboutsia	0	0	0	0	0	0	0	0	0	0	0	0	0	0	0	0	0	0	0	0.621952	0	0.393044	0	0	0	0	0	1.05643	0.687754	0	0	0.151643	0	0	0	0	0	0	0
Roseburia	0	0	0	0	0	0	0	0	0	0	0	0	0	0	0	0	0	0	0	0.406319	0	0.66179	0	1.35273	0	0.869476	0	0	0.336883	0	0.222466	0	0	0	0	0	0	0	0
Rubneribacter	0	0	0	0	0	0	0	0.106011	0	0	0	0	0	0	0	0	0	0	0	0	0	0	0	0	0	0	0	0	0	0	0	0	0	0	0	0	0	0	0
Ruminiclostridium	0	0	0	0	0	0	0	0	0	0	0	0	0	0	0	0	0	0	0	0	0	0.398336	0	0	0	0	0	0	0.847971	0	0	0	0	0	0	0	0	0	0
Ruminobacter	0	0	0	0	0	0	0	0	0	0	0	0	0	0	0	0	0	0	0	0	0	0	0	0	0	0	0	0	0	0	0.59255	0	0	0	0.579107	0	0	0	0
Ruminococcaceae_norank	0	0	0	0	0	0	0	0	0	0	0	0	0	0	0.663733	0	0	0	0	0	0.916814	44.2053	0	19.9052	10.0324	0.390385	54.6276	0.0921329	46.2363	2.30788	0.903764	0	0	0	0	0	0	0	0
Ruminococcus	0	0	0	0	0	0	0	0	0	0	0	0	0	0	0	0	0	0	0	0.0755122	0.159877	9.50922	0	20.9592	0.24873	2.34097	5.10274	0.117118	22.4596	2.73933	0.297042	0	0	0	0	0	0	0	0
Ruthenibacterium	0	0	0	0	0	0	0	0	0	0	0	0	0	0	0	0	0	0	0	0	0	0.0742638	0	0	0	0	0	0	1.18696	0	0	0	0	0	0	0	0	0	0
Sarcina	0	0	0	0	0	0	0	0	0	0	0	0	0	0	0	0	0	0	0	0	0.113214	0.0330611	0	0.273777	0	0	0	0	0.611662	0	0	0	0	0	0	0	0	0	0
Schaedlerella	0	0	0	0	0	0	0	0	0	0	0	0	0	0	0	0	0	0	0	0	0.0389444	0	0	0	0	0	0	0	0.0997503	0	0	0	0	0	0	0	0	0	0
Schwartzia	0	0	0	0	0.735761	0	0	0	0	0	0	0	0	0	0	0	0	0	0	0	0	0.0725977	0	0	0	0	0	0	2.2047	0	0	0	0	0	0	0	0	0	0.098302
Sedimentibacter	0	0	0	0	0	0	0	0	0	0	0	0	0	0	0	0	0	0	0	0	0	0	0	0	0	0	0	0	0.0374951	0	0	0	0	0	0	0	0	0	0
Selenomonadales_norank	0	0	0	0	0	0	0	0	0	0	0	0	0	0	0	0	0	0	0	0	0	0.041665	0	2.68288	0	0	0	0	0.472489	0	0	0	0	0	0	0	0	0	0
Selenomonas	0	0	0	0	1.63562	0	0	0	0	0	0	0	0	0	0	0.322263	0	0	0	0.0482509	0	2.06136	0	0	0	0	0	0	0.44389	0.320669	0.268617	0	0	0	0.380437	0	0.39341	2.07816	1.33247
Shigella	0	0	0	0.192905	0.125356	0	0	0	0	0	0	0	0	0	0	0	0	0	0	0	0	0	0	0	0	0	0	0	0	0	0	0	0.277882	0	0	0	0	0.151557	0.17625
Shuttleworthia	0	0	0	0	0	0	0	0	0	0	0	0	0	0	0	0	0	0	0	0	0	0	0	0.454246	0	0	0	0	0	0	0	0	0	0	0	0	0	0	0
Slackia	0	0	0	0	0	0	0	0	0	0	0	0	0	0	0	0	0	0	0	0	0.0105409	0	0	0	0	0	0	0	0.0436185	0	0	0	0.196677	0	0	0	0.0136234	0	0
Soehngenia	0	0	0	0	0	0	0	0	0	0	0	0	0	0	0	0	0	0	0	0	0.0208177	0	0	0	0	0	0	0	0	0	0	0	0	0	0	0	0	0	0
Spartobacteria_norank	0	0	0	0	0	0	0	0	0	0	0	0	0	0	0	0	0	0	0	0	0	0	0	0	0	0	0	0	0.670254	0	0	0	0	0	0	0	0	0	0
Sphaerochaeta	0	0	0	0	0	0	0	0	0	0	0	0	0	0	0	0	0	0	0	0	0.0321448	0	0	0.023981	0	0	0	0	0.168629	0	0	0	0	0	0	0	0	0	0
Sphingobacteriia_norank	0	0	0	0	0	0	0	0	0	0	0	0	0	0	0	0	0	0	0	0	0	0	0	0	0	0	0	0	0	0	0	0	0	0	0.789282	0	0	0	0
Spirochaeta	0	0	0	0	0	0	0	0	0	0	0	0	0	0	0	0	0	0	0	0	0	0	0	0	0	0	0	0	0.100324	0	0	0	0	0	0	0	0	0	0
Spirochaetaceae_norank	0	0	0	0	0	0	0	0	0	0	0	0	0	0	0	0	0	0	0	0	0	0	0	0	0	0	0	0	0.0234391	0	0	0	0	0	0	0	0	0	0
Spirochaetales_norank	0	0	0	0	0	0	0	0	0	0	0	0	0	0	0	0	0	0	0	0	0	0	0	0	0	0	0	0	0.0114996	0	0	0	0	0	0	0	0	0	0
Spirochaetes_norank	0	0	0	0	0	0	0	0	0	0	0	0	0	0	0	0	0	0	0	0	0	0	0	0	0	0	0	0	0.0313269	0	0	0	0	0	0	0	0	0	0
Spirochaetia_norank	0	0	0	0	0	0	0	0	0	0	0	0	0	0	0	0	0	0	0	0	0	0.125826	0	0	0	0	0	0	0.2651	0	0	0	0	0	0	0	0	0	0
Sporanaerobacter	0	0	0	0	0	0	0	0	0	0	0	0	0	0	0	0	0	0	0	0	0	0	0	0	0	0	0	0	0.0333677	0	0	0	0	0	0	0	0	0	0
Sporobacter	0	0	0	0	0	0	0	0	0	0	0	0	0	0	0	0	0	0	0	0	0	0.0136638	0	0	0	0	0	1.56868	0.0151846	0	0	0.316903	0	0	0	0	0	0	0
Subdoligranulum	0	0	0	0	0	0	0	0	0	0	0	0	0	0	0	0	0	0	0	0	0	0	0	0.0912815	0	0	0	0	0.106914	0	0	0	0	0	0	0	0	0	0
Succiniclasticum	0	0	0	0	0	0	0	0	0	0	0	0	0	0	3.25535	0	0	0	0	0	0	0	0	0	0	0.0896004	0	0	0	0.904979	0	0	0	0	0	0	0	0	0
Succinimonas	0	0	0	0	0	0	0	0	0	0	0	0	0	0	0	0	0	0	0	0	0	0	0	0	0	0	0	0	0	0	0	0	0	0	0.258067	0	0	0	0
Succinivibrio	0	0	0	0	0	0	0	0	0	0	0	0	0	0	0	0	0	0	0	0	0	0	0	0	0	0	0	0	0	0.0690865	0	0	0	0	0.640423	0	0	0	0
Succinivibrionaceae_norank	0	0	0	0	0	0	0	0	0	0	0	0	0	0	0	0	0	0	0	0	0	0	0	0	0	0	0	0	0	0	0	0	0	0	0.0340451	0	0	0	0
Synergistaceae_norank	0	0	0	0	0	0	0	0	0	0	0	0	0	0	0	0	0	0	0	0	0	0.0315766	0	0	0	0	0	0	0	0	0	0	0	0	0	0	0	0	0
Synergistes	0	0	0	0	0	0	0	0	0	0	0	0	0	0	0	0	0	0	0	0	0	0.0601139	0	0	0	0	0	0	0	0	0	0	0	0	0	0	0	0	0
Syntrophus	0	0	0	0	0	0	0	0	0	0	0	0	0	0	0	0	0	0	0	0	0	0.0187754	0	0	0	0	0	0	0	0	0	0	0	0	0	0	0	0	0
Tannerella	0	0	0	0	0	0	0	0	0	0	0	0	0	0	0	0	0	0	0	0	0	0	0	0	0	0	0	0	0	0	0	0	0	0	1.12076	0	0	0	0
Tepidanaerobacter	0	0	0	0	0	0	0	0	0	0	0	0	0	0	0	0	0	0	0	0	0	0.0134539	0	0	0	0	0	0	0	0	0	0	0	0	0	0	0	0	0
Terrisporobacter	0	0	0	0	0	0	0	0	0	0	0	0	0	0	0	0	0	0	0	0	0	0	0.0727871	0	0	0	0	0	0	0	0	0	0	0	0	0	0	0	0
Thermacetogenium	0	0	0	0	0	0	0	0	0	0	0	0	0	0	0	0	0	0	0	0	0	0	0	0	0	0	0	0	0.0150155	0	0	0	0	0	0	0	0	0	0
Thermoanaerobacterium	0	0	0	0	0	0	0	0	0	0	0	0	0	0	0	0	0	0	0	0	0	0.0350946	0	0	0	0	0	0	0.122925	0	0	0	0	0	0	0	0	0	0
Thermobrachium	0	0	0	0	0	0	0	0	0	0	0	0	0	0	0	0	0.141354	0	0	0	0	0	0	0	0	0	0	0	0.0286166	0	0	0	0	0	0	0	0	0	0
Thermoclostridium	0	0	0	0	0	0	0	0	0	0	0	0	0	0	0	0	0	0	0	0	0	0.103961	0	0.138334	0	0	0.399928	0	0.626929	0	0	0	0	0	0	0	0	0	0
Thermococcus	0	0	0	0	0	0	0	0	0	0	0	0	0	0	0	0	0	0	0	0	0	0	0	0	0	0	0	0	0.0215368	0	0	0	0	0	0	0	0	0	0
Thermodesulfovibrio	0	0	0	0	0	0	0	0	0	0	0	0	0	0	0	0	0	0	0	0	0	0.0265745	0	0	0	0	0	0	0	0	0	0	0	0	0	0	0	0	0
Thermohalobacter	0	0	0	0	0	0	0	0	0	0	0	0	0	0	0	0	0	0	0	0	0	0.257882	0	0	0	0	0	0	0	0	0	0	0	0	0	0	0	0	0
Thermoplasmata_norank	0	0	0	0	0	0	0	0	0	0	0.0364816	0	0	0	0	0	0	0	0	0	0	0	0	0	0	0	0	0	0	0	0	0	0	0	0	0.0460489	0	0	0
Thermotalea	0	0	0	0	0	0	0	0	0	0	0	0	0	0	0	0	0	0	0	0	0	0.245804	0	0	0	0	0	0	0.301195	0	0	0	0	0	0	0	0	0	0
Thermotoga	0	0	0	0	0	0	0	0	0	0	0	0	0	0	0	0	0	0	0	0	0	0	0	0	0	0	0	0	0.0151291	0	0	0	0	0	0	0	0	0	0
Tissierella	0	0	0	0	0	0	0	0	0	0	0	0	0	0	0	0	0	0	0	0	0.0264113	0	0	0	0	0	0	0	0	0	0	0	0	0	0	0	0	0	0
Traorella	0	0	0	0	0	0	0	0	0	0	0	0	0	0	0	0	0	0	0	0	0	0	0	0	0	0	0	0	0.171235	0	0	0	0	0	0	0	0	0	0
Treponema	0	0	0	0	0	0	0	0	0	0	0	0	0	0	0	0	0	0	0	0	0	4.10221	0	6.29604	0	3.41388	2.22066	2.96794	3.32653	6.27415	0	0	0	0	0	0	0	0	0
Trichomonas	0	0	0	0	0	0	0	0	0	0	0	0	0	0	0	0	0	0	0	20.2867	0	0	0	0	0	0	0	0	0	0	0	0	0	0	0	0	0	0	0
Turicibacter	0	0	0	0	0	0	0	0	0	0	0	0	0	0	0	0	0	0	0	0	0	0.0654353	0	0	0	0	0	0	0.314834	0.0599804	0	0.116955	0	0	0	0	0	0	0
Tyzzerella	0	0	0	0	0	0	0	0	0	0	0	0	0	0	0	0	0	0	0	0	0	0.927332	0	0.0580712	0	0	0.0910477	0	0	0	0	0	0	0	0	0	0	0	0
Vallitalea	0	0	0	0	0	0	0	0	0	0	0	0	0	0	0	0	0	0	0	0	0	0.179052	0	0	0	0	0	0	0.267397	0	0	0	0	0	0	0	0	0	0
Veillonellaceae_norank	0	0	0	0	0	0	0	0	0	0	0	0	0	0	0	0	0	0	0	0.430696	0	0	0	0	0	0	0	0	0	0	0	0	0	0	0	0	0	0	0
Verrucomicrobia_norank	0	0	0	0	0	0	0	0	0	0	0	0	0	0	0	0	0	0	0	0	0	0.41534	0	0	0	0	0	0	0.107552	0	0	0	0	0	0	0	0	0	0
Vulcanibacillus	0	0	0	0	0	0	0	0	0	0	0	0	0	0	0	0	0	0	0	0	0	0	0	0	0	0	0	0	0.0754421	0	0	0	0	0	0	0	0	0	0
Xylanivirga	0	0	0	0	0	0	0	0	0	0	0	0	0	0	0	0	0	0	0	0	0	0.0368891	0	0	0	0	0	0	0.0983303	0	0	0	0	0	0	0	0	0	0
