# Supplementary material for: Reductive acetogenesis is a dominant process in the ruminant hindgut
Source: Research Square preprint supplement (doi:10.21203/rs.3.rs-4473149/v1), 2024-06-10
Supplement: Supplementary file 9 [file ddf55c49be3073d60890a547.xlsx]

## Sheet: Abundance
		Rumen			Cecum
Family	Putative Substrate	Mean	SD	SEM	Mean	SD	SEM	P value	FDR Adj PValue	Group	Fold Change1
GH13	Starch	1759.03	182.224	45.5561	1863.69	150.333	37.5832	0.0083	0.0115577	Cecum	1.0595
GH109	Host-glycans	729.974	116.064	29.0161	1775.64	234.842	58.7106	<.0001	6.45786e-06	Cecum	2.43247
GH2	hemicellulose	1399.23	309.143	77.2858	1422.83	102.184	25.5459	0.2	0.231548	Cecum	1.01687
GH3	cellulose	1625.1	261.623	65.4057	1107.62	87.1248	21.7812	<.0001	7.32098e-05	Rumen	1.4672
GH43	hemicellulose	1825.9	396.85	99.2125	825.826	140.013	35.0033	<.0001	8.04794e-06	Rumen	2.21099
GH20	Host-glycans	306.412	78.6385	19.6596	692.72	155.955	38.9888	<.0001	6.45786e-06	Cecum	2.26075
GH78	pectin	405.033	95.1069	23.7767	683.384	117.744	29.436	<.0001	2.02251e-05	Cecum	1.68723
GH5	cellulose	966.362	138.73	34.6824	525.538	95.2793	23.8198	<.0001	6.74298e-06	Rumen	1.83881
GH77	Starch	340.621	44.2272	11.0568	488.83	21.9604	5.4901	<.0001	6.45786e-06	Cecum	1.43512
GH25	Host-glycans	560.312	78.5679	19.642	440.236	65.2552	16.3138	0.001	0.00164702	Rumen	1.27275
GH31	hemicellulose	626.59	89.3791	22.3448	424.276	60.9881	15.247	<.0001	2.968e-05	Rumen	1.47685
GH36	Host-glycans	228.339	49.5089	12.3772	414.93	71.1133	17.7783	<.0001	6.99527e-06	Cecum	1.81717
GH33	Sialic acids	178.632	55.524	13.881	411.792	50.0177	12.5044	<.0001	6.45786e-06	Cecum	2.30526
GH29	fucose	330.43	77.7822	19.4455	407.178	56.1824	14.0456	0.0037	0.00544978	Cecum	1.23227
GH28	pectin	496.638	130.458	32.6144	382.605	66.5132	16.6283	0.0458	0.0575053	Rumen	1.29804
GH16	hemicellulose	330.235	46.1398	11.5349	340.864	93.9457	23.4864	0.4975	0.533833	Cecum	1.03218
GH38	Mannan	58.346	9.96369	2.49092	334.193	98.3761	24.594	<.0001	6.45786e-06	Cecum	5.72778
GH23	Host-glycans	511.775	104.723	26.1808	321.176	60.861	15.2153	<.0001	0.000152619	Rumen	1.59344
GH163	none	58.4359	13.7229	3.43072	307.128	82.2928	20.5732	<.0001	6.45786e-06	Cecum	5.25581
GH4	Host-glycans	158.996	28.003	7.00076	297.887	31.303	7.82576	<.0001	6.45786e-06	Cecum	1.87354
GH39	hemicellulose	87.9703	14.2467	3.56168	274.985	80.4992	20.1248	<.0001	6.45786e-06	Cecum	3.12589
GH106	Rhamose	260.339	62.6546	15.6637	260.512	43.86	10.965	0.6242	0.650725	Cecum	1.00066
GH73	Host-glycans	451.409	103.931	25.9827	256.986	37.8164	9.4541	<.0001	2.53722e-05	Rumen	1.75655
GH18	Host-glycans	193.752	28.0363	7.00909	255.713	33.9502	8.48755	<.0001	1.04566e-05	Cecum	1.3198
GH95	fucose	257.02	62.0481	15.512	241.013	37.1577	9.28942	0.8802	0.880168	Rumen	1.06642
GH10	hemicellulose	435.921	70.3043	17.5761	218.933	54.683	13.6707	<.0001	8.04794e-06	Rumen	1.99112
GH94	cellulose	282.072	29.0174	7.25434	212.215	52.2003	13.0501	0.0012	0.00183233	Rumen	1.32918
GH92	Host-glycans	351.249	98.508	24.627	210.536	59.542	14.8855	0.0003	0.000507205	Rumen	1.66835
GH51	hemicellulose	410.803	99.0214	24.7554	209.956	41.1101	10.2775	<.0001	3.41306e-05	Rumen	1.95662
GH127	hemicellulose	181.432	41.3843	10.3461	183.147	34.3654	8.59135	0.5217	0.555735	Cecum	1.00945
GH24	none	152.385	29.0872	7.27179	177.703	40.6124	10.1531	0.1051	0.123596	Cecum	1.16614
GH123	Host-glycans	26.1058	7.65876	1.91469	173.503	30.6762	7.66906	<.0001	6.45786e-06	Cecum	6.64614
GH30	cellulose	201.742	48.7974	12.1994	165.776	58.7647	14.6912	0.05	0.061785	Rumen	1.21695
GH141	hemicellulose	75.5164	18.6944	4.6736	165.577	51.6527	12.9132	<.0001	2.53722e-05	Cecum	2.1926
GH97	Galactose	501.129	134.23	33.5574	156.023	46.5576	11.6394	<.0001	6.99527e-06	Rumen	3.2119
GH88	Host-glycans	47.1636	13.2558	3.31395	150.174	109.942	27.4854	<.0001	6.45786e-06	Cecum	3.18411
GH105	pectin	242.715	59.5177	14.8794	145.178	19.6025	4.90062	0.0002	0.000387059	Rumen	1.67185
GH9	cellulose	384.236	64.9453	16.2363	142.936	85.8243	21.4561	<.0001	4.57668e-05	Rumen	2.68816
GH27	Galactose	221.144	39.2165	9.80414	140.528	23.6004	5.9001	<.0001	2.32419e-05	Rumen	1.57366
GH133	none	144.321	32.6993	8.17482	137.679	18.3866	4.59664	0.8802	0.880168	Cecum	1.04825
GH57	Starch	173.66	38.5239	9.63099	130.344	31.8325	7.95814	0.0059	0.00863965	Rumen	1.33232
GH1	cellulose	67.0099	16.5018	4.12546	129.913	29.5082	7.37705	<.0001	1.04566e-05	Cecum	1.93871
GH35	hemicellulose	172.03	57.5523	14.3881	127.683	27.3565	6.83913	0.0899	0.1092	Rumen	1.34732
GH42	hemicellulose	49.9571	16.5224	4.13059	125.362	20.3635	5.09088	<.0001	6.45786e-06	Cecum	2.5094
GH99	Mannan	83.7645	18.6352	4.65881	124.796	29.098	7.27451	<.0001	0.00013393	Cecum	1.48984
GH130	Host-glycans	175.681	33.673	8.41824	121.687	18.418	4.60451	<.0001	0.00017381	Rumen	1.44371
GH110	Galactose	14.082	7.97003	1.99251	119.896	26.8555	6.71389	<.0001	6.45786e-06	Cecum	8.5141
GH146	hemicellulose	158.916	53.6706	13.4177	118.224	22.1275	5.53188	0.0458	0.0575053	Rumen	1.34419
GH26	Mannan	273.75	51.154	12.7885	117.372	44.266	11.0665	<.0001	1.20559e-05	Rumen	2.33232
GH32	Fructan	253.35	47.7284	11.9321	117.154	24.229	6.05726	<.0001	6.45786e-06	Rumen	2.16255
GH151	fucose	26.2763	7.03465	1.75866	116.823	23.9315	5.98288	<.0001	6.45786e-06	Cecum	4.44595
GH171	none	135.03	34.6352	8.6588	116.184	24.1671	6.04178	0.0973	0.117184	Rumen	1.1622
GH53	pectin	241.187	53.3035	13.3259	94.9312	14.4088	3.60219	<.0001	6.45786e-06	Rumen	2.54065
GH79	Host-glycans	0.687783	0.445274	0.111318	91.3009	17.9166	4.47915	<.0001	6.45786e-06	Cecum	132.747
GH136	Host-glycans	15.601	5.9493	1.48733	88.8482	35.9279	8.98198	<.0001	6.45786e-06	Cecum	5.69504
GH84	Host-glycans	35.2961	9.25148	2.31287	85.1594	30.8267	7.70668	<.0001	1.20559e-05	Cecum	2.41271
GH89	Host-glycans	94.2822	26.0857	6.52143	83.3129	19.0109	4.75274	0.2427	0.276523	Rumen	1.13166
GH74	glucan	101.433	26.8008	6.70021	72.3516	26.6891	6.67227	0.0176	0.0237053	Rumen	1.40195
GH129	Host-glycans	26.568	6.424	1.606	70.3304	20.4314	5.10786	<.0001	6.74298e-06	Cecum	2.64719
GH63	Mannan	22.3454	15.7519	3.93796	63.8615	18.4039	4.60097	<.0001	3.92348e-05	Cecum	2.85792
GH125	Mannan	61.2174	14.3604	3.59011	58.0804	8.645	2.16125	0.8505	0.86226	Cecum	1.05401
GH115	hemicellulose	235.638	71.5677	17.8919	51.7752	8.93308	2.23327	<.0001	6.45786e-06	Rumen	4.55118
GH165	none	3.55456	2.11961	0.529903	50.304	20.3173	5.07932	<.0001	6.45786e-06	Cecum	14.152
GH65	Host-glycans	20.1829	5.41147	1.35287	50.0025	9.08335	2.27084	<.0001	6.45786e-06	Cecum	2.47747
GH76	Mannan	87.3849	26.6725	6.66813	45.9295	14.5868	3.64669	0.0001	0.000195281	Rumen	1.90259
GH112	Galactose	6.78355	1.65166	0.412915	43.8799	13.0405	3.26012	<.0001	6.45786e-06	Cecum	6.46858
GH112	Rhamose	6.78355	1.65166	0.412915	43.8799	13.0405	3.26012	<.0001	6.45786e-06	Cecum	6.46858
GH37	Trehalose	7.67364	2.24874	0.562185	42.0404	13.3375	3.33437	<.0001	6.45786e-06	Cecum	5.47855
GH144	glucan	22.0966	4.8347	1.20868	40.704	10.8447	2.71118	<.0001	2.53722e-05	Cecum	1.84209
GH156	none	11.7281	4.54519	1.1363	39.4333	9.85225	2.46306	<.0001	6.45786e-06	Cecum	3.3623
GH116	hemicellulose	13.3063	3.68421	0.921053	37.0834	11.1476	2.78691	<.0001	6.74298e-06	Cecum	2.78692
GH116	Host-glycans	13.3063	3.68421	0.921053	37.0834	11.1476	2.78691	<.0001	6.74298e-06	Cecum	2.78692
GH93	hemicellulose	23.9831	10.887	2.72174	34.8859	13.6493	3.41232	0.0083	0.0115577	Cecum	1.45461
GH148	none	17.222	4.41525	1.10381	34.8072	21.703	5.42576	<.0001	3.41306e-05	Cecum	2.02108
GH154	none	65.9827	15.1707	3.79267	33.3622	6.83578	1.70895	<.0001	2.32419e-05	Rumen	1.97777
GH8	hemicellulose	110.751	31.8148	7.95371	33.1202	8.77656	2.19414	<.0001	6.45786e-06	Rumen	3.34392
GH117	Galactose	15.3536	5.90722	1.4768	31.5492	15.9145	3.97862	0.0001	0.000195281	Cecum	2.05484
GH15	glucan	14.9786	8.1324	2.0331	31.3703	10.635	2.65874	0.0002	0.000387059	Cecum	2.09434
GH15	Starch	14.9786	8.1324	2.0331	31.3703	10.635	2.65874	0.0002	0.000387059	Cecum	2.09434
GH120	hemicellulose	73.3375	16.2545	4.06363	30.2899	12.2014	3.05035	<.0001	1.04566e-05	Rumen	2.42119
GH67	hemicellulose	84.3638	22.1775	5.54437	28.8597	8.17482	2.0437	<.0001	9.46606e-06	Rumen	2.92324
GH140	Rhamose	48.3533	17.0365	4.25913	27.7225	6.03361	1.5084	<.0001	0.000152619	Rumen	1.74419
GH164	Mannan	12.0201	3.56191	0.890477	27.0453	9.78119	2.4453	<.0001	6.99527e-06	Cecum	2.25001
GH98	Host-glycans	25.8374	13.7	3.425	25.4825	11.6227	2.90568	0.7345	0.755003	Cecum	1.01393
GH124	cellulose	20.5013	6.78209	1.69552	23.2508	11.381	2.84526	0.4975	0.533833	Cecum	1.13411
GH50	Host-glycans	11.7465	3.40384	0.850961	20.9505	10.4929	2.62324	0.0014	0.0020571	Cecum	1.78354
GH142	none	29.8452	8.27618	2.06905	19.5336	4.85372	1.21343	0.0015	0.00229588	Rumen	1.52789
GH85	Host-glycans	3.95331	2.15016	0.537539	19.1279	28.0329	7.00822	0.0002	0.000341627	Cecum	4.83845
GH167	none	0.643919	0.768083	0.192021	18.0352	17.1969	4.29923	<.0001	6.99527e-06	Cecum	28.0085
GH113	Mannan	11.6533	4.54285	1.13571	17.9173	5.56983	1.39246	0.0007	0.00113327	Cecum	1.53753
GH11	hemicellulose	70.1368	30.7326	7.68315	17.6622	27.0729	6.76822	<.0001	3.92348e-05	Rumen	3.97101
GH170	none	9.83993	3.85749	0.964372	16.4837	6.03728	1.50932	0.0015	0.00229588	Cecum	1.67519
GH128	glucan	33.7314	15.265	3.81624	16.18	7.20478	1.8012	0.0009	0.00145581	Rumen	2.08476
GH158	glucan	11.0609	7.60019	1.90005	15.1229	9.82257	2.45564	0.407	0.446503	Cecum	1.36724
GH108	none	19.6431	8.75722	2.18931	13.6731	10.2806	2.57016	0.0418	0.0539395	Rumen	1.43663
GH75	Host-glycans	0.103293	0.117435	0.0293587	11.5216	12.4561	3.11402	<.0001	6.45786e-06	Cecum	111.544
GH55	glucan	15.3914	4.988	1.247	11.3368	5.04315	1.26079	0.0899	0.1092	Rumen	1.35765
GH161	none	6.60183	2.83232	0.708079	11.2442	4.52825	1.13206	0.0007	0.00113327	Cecum	1.7032
GH137	Rhamose	19.2251	7.69245	1.92311	10.7935	3.80484	0.95121	0.0006	0.0010094	Rumen	1.78118
GH66	glucan	11.4366	4.58252	1.14563	9.45588	6.03149	1.50787	0.2913	0.324394	Rumen	1.20947
GH166	none	23.0987	12.1785	3.04463	9.41595	3.34214	0.835536	<.0001	9.85569e-05	Rumen	2.45315
GH91	none	1.27311	1.26553	0.316382	6.63315	7.18564	1.79641	<.0001	2.53722e-05	Cecum	5.21022
GH104	Host-glycans	4.812	6.36394	1.59099	6.21242	4.25008	1.06252	0.0317	0.0415963	Cecum	1.29103
GH19	chitin	16.2292	8.32809	2.08202	5.04013	2.43844	0.60961	<.0001	0.00017381	Rumen	3.21999
GH159	none	4.41401	1.9432	0.485799	4.74805	1.6682	0.41705	0.451	0.49107	Cecum	1.07568
GH101	Host-glycans	0	0	0	4.67033	5.90941	1.47735	<.0001	6.45786e-06	Cecum	467.033
GH82	iota-carrageenan	2.73408	2.62044	0.655111	4.39297	2.65356	0.66339	0.05	0.061785	Cecum	1.60674
GH103	Host-glycans	1.99562	2.59209	0.648022	4.21873	3.08219	0.770548	0.0002	0.000297582	Cecum	2.11399
GH134	Mannan	0.794942	0.289922	0.0724805	3.95391	5.82089	1.45522	0.0129	0.0176751	Cecum	4.97384
GH143	none	17.1548	7.85835	1.96459	3.17071	0.862912	0.215728	<.0001	6.45786e-06	Rumen	5.41039
GH153	none	0.69463	0.867408	0.216852	3.01383	2.84136	0.710339	0.0012	0.00183233	Cecum	4.33876
GH44	hemicellulose	7.77023	4.66035	1.16509	2.97498	2.04428	0.51107	0.0002	0.000297582	Rumen	2.61185
GH102	Host-glycans	1.29087	0.708844	0.177211	2.77731	1.5486	0.38715	0.0008	0.00128523	Cecum	2.1515
GH87	none	8.41403	6.42491	1.60623	2.77108	1.27069	0.317674	0.0001	0.000195281	Rumen	3.03638
GH114	Host-glycans	3.7325	3.02861	0.757152	2.69317	1.17324	0.293309	0.6242	0.650725	Rumen	1.38591
GH54	hemicellulose	20.2075	7.90835	1.97709	2.52174	1.97677	0.494192	<.0001	6.74298e-06	Rumen	8.01331
GH59	none	6.80862	3.26971	0.817427	2.41817	1.34205	0.335512	<.0001	7.32098e-05	Rumen	2.81561
GH72	glucan	0.0474872	0.0770199	0.019255	2.30783	1.44133	0.360332	<.0001	6.45786e-06	Cecum	48.5991
GH126	none	9.43933	6.05607	1.51402	2.28333	2.28789	0.571972	<.0001	9.85569e-05	Rumen	4.13401
GH48	cellulose	3.36217	2.90799	0.726996	2.17408	4.55231	1.13808	0.0083	0.0115577	Rumen	1.54648
GH139	fucose	15.6856	7.11701	1.77925	2.10575	1.21422	0.303555	<.0001	6.99527e-06	Rumen	7.44893
GH81	glucan	3.76128	2.15743	0.539358	2.05322	2.05728	0.51432	0.0067	0.0095919	Rumen	1.83189
GH47	Mannan	2.79769	2.44763	0.611907	1.65836	1.33871	0.334677	0.2278	0.261614	Rumen	1.68703
GH160	none	2.36857	1.12821	0.282052	1.54016	0.745313	0.186328	0.1051	0.123596	Rumen	1.53788
GH17	glucan	1.64557	0.574889	0.143722	1.43906	0.873989	0.218497	0.2913	0.324394	Rumen	1.1435
GH169	none	0.418488	0.851175	0.212794	1.30633	0.944802	0.2362	0.0458	0.0575053	Cecum	3.12156
GH138	Galactose	16.6834	8.31353	2.07838	1.3053	0.863387	0.215847	<.0001	6.74298e-06	Rumen	12.7813
GH46	Host-glycans	2.58994	2.34178	0.585446	1.0396	0.706936	0.176734	0.0215	0.0287366	Rumen	2.49129
GH147	Galactose	1.31244	1.25591	0.313977	0.899768	0.895943	0.223986	0.3461	0.382508	Rumen	1.45864
GH52	hemicellulose	0	0	0	0.800701	0.696518	0.174129	<.0001	6.45786e-06	Cecum	80.0701
GH149	none	11.302	4.2915	1.07287	0.725423	1.10806	0.277016	<.0001	6.45786e-06	Rumen	15.5799
GH80	chitin	0.5123	0.290608	0.0726519	0.704634	0.547193	0.136798	0.2582	0.291959	Cecum	1.37543
GH135	Host-glycans	0.202294	0.230566	0.0576414	0.617919	0.722623	0.180656	0.0005	0.000883818	Cecum	3.05456
GH64	glucan	9.20218	5.1078	1.27695	0.525532	0.398878	0.0997195	<.0001	6.99527e-06	Rumen	17.5102
GH71	none	0.333182	0.519301	0.129825	0.475143	0.335406	0.0838515	0.026	0.034479	Cecum	1.42608
GH22	Host-glycans	4.05481	2.77841	0.694603	0.474653	0.938297	0.234574	<.0001	2.53722e-05	Rumen	8.54268
GH12	hemicellulose	0.503981	0.552934	0.138233	0.437158	0.172261	0.0430653	0.7345	0.755003	Rumen	1.15286
GH12	glucan	0.503981	0.552934	0.138233	0.437158	0.172261	0.0430653	0.7345	0.755003	Rumen	1.15286
GH100	none	0	0	0	0.391499	0.781429	0.195357	<.0001	1.01482e-05	Cecum	39.1499
GH168	none	0.33351	0.300309	0.0750773	0.323972	0.21462	0.0536549	0.7919	0.808415	Cecum	1.02944
GH45	glucan	61.8823	42.4317	10.6079	0.275671	0.817111	0.204278	<.0001	6.45786e-06	Rumen	224.479
GH107	fucose	0.0778827	0.0862655	0.0215664	0.252633	0.134261	0.0335653	0.0001	0.000218594	Cecum	3.24376
GH62	hemicellulose	0.0638588	0.166454	0.0416134	0.0958685	0.276609	0.0691523	0.5817	0.615199	Cecum	1.50126
GH14	none	0.0418256	0.118431	0.0296077	0.07249	0.161781	0.0404452	0.0984	0.117608	Cecum	1.73315
GH86	Host-glycans	0	0	0	0.0461552	0.0774866	0.0193717	0.0002	0.00042147	Cecum	4.61552
GH49	glucan	0.104738	0.0971941	0.0242985	0.0356926	0.0747739	0.0186935	0.0081	0.0115245	Rumen	2.93446
GH49	Starch	0.104738	0.0971941	0.0242985	0.0356926	0.0747739	0.0186935	0.0081	0.0115245	Rumen	2.93446
GH152	none	0	0	0	0.0267987	0.10285	0.0257126	0.1508	0.17589	Cecum	2.67987
GH121	hemicellulose	0.117728	0.157164	0.0392909	0.0121006	0.0152489	0.00381223	0.0151	0.0205016	Rumen	9.72912
GH119	none	0.765647	2.68931	0.672326	0.0054205	0.00897313	0.00224328	0.0012	0.00183233	Rumen	141.25
GH6	cellulose	0.661417	0.386286	0.0965715	0.00415706	0.00941119	0.0023528	<.0001	6.45786e-06	Rumen	159.107
GH157	none	0.0756383	0.157813	0.0394533	0	0	0	0.0359	0.046643	Rumen	7.56383
PS1: If the expression of the gene is 0, we treat it as 0.01 in order to calculate FC.
References
1. Nuccio EE, Starr E, Karaoz U, Brodie EL, Zhou J, Tringe SG, Malmstrom RR, Woyke T, Banfield JF, Firestone MK, et al. Niche differentiation is spatially and temporally regulated in the rhizosphere. ISME J 2020; 14:999–1014.
2. Kaoutari AE, Armougom F, Gordon JI, Raoult D, Henrissat B. The abundance and variety of carbohydrate-active enzymes in the human gut microbiota. Nat Rev Microbiol 2013; 11:497–504.
3. Crouch LI, Liberato MV, Urbanowicz PA, Baslé A, Lamb CA, Stewart CJ, Cooke K, Doona M, Needham S, Brady RR, et al. Prominent members of the human gut microbiota express endo-acting O-glycanases to initiate mucin breakdown. Nat Commun 2020; 11:4017.
4. Chang H-X, Yendrek CR, Caetano-Anolles G, Hartman GL. Genomic characterization of plant cell wall degrading enzymes and in silico analysis of xylanses and polygalacturonases of Fusarium virguliforme. BMC Microbiology 2016; 16:147.
5. Blackman LM, Cullerne DP, Hardham AR. Bioinformatic characterisation of genes encoding cell wall degrading enzymes in the Phytophthora parasitica genome. BMC Genomics 2014; 15:785.
6. Wardman JF, Bains RK, Rahfeld P, Withers SG. Carbohydrate-active enzymes (CAZymes) in the gut microbiome. Nat Rev Microbiol 2022; 20:542–56.
7.Lin L, Lai Z, Zhang J, Zhu W, Mao S. The gastrointestinal microbiome in dairy cattle is constrained by the deterministic driver of the region and the modified effect of diet. Microbiome 2023; 11:10.

## Sheet: Phylum
phylum	GH3	GH30	GH48	GH5	GH6	GH9	GH94	GH1	GH124	GH10	GH11	GH115	GH67	GH8	GH12	GH120	GH121	GH146	GH31	GH35	GH43	GH44	GH51	GH54	GH116	GH127	GH141	GH16	GH2	GH39	GH42	GH52	GH62	GH93	GH105	GH28	GH53	GH78	GH12	GH128	GH17	GH45	GH49	GH55	GH64	GH66	GH74	GH81	GH144
Abditibacteriota	0	0	0	0	0	0	0	0	0	0.021347	0	0	0	0	0	0	0	0	0	0	0	0	0	0	0	0	0	0	0	0.0249238	0	0	0	0	0	0	0	0	0	0	0	0	0	0	0	0	0	0	0
Acidobacteria	1.1484	0.326406	0	0.286052	0	0.420915	0.0313805	0.0835877	0	0.0125092	0	0	0	0	0	0.0323124	0	3.87045	1.25209	0.10029	1.68497	0	2.63322	0	0.286133	0.33982	0.0970754	0.0540117	5.05188	0.092801	0.0228626	0	0	0	0.0505314	0.0777912	0	1.25383	0	0.0288922	0	0	0	0.021088	0	0	0	0	0
Actinobacteria	6.56938	3.42007	0	2.81734	0	0.0583746	0.0388958	2.62932	0.0457442	0.698824	0	1.40971	0.197586	0	0.0175599	0.11351	0	0.428076	1.541	0.925173	8.11695	0	0.489696	0.0266411	0.0854931	0.0766932	1.39312	2.05833	2.48481	2.55102	1.25786	0	0	1.58867	0.453192	2.61187	0.134278	5.41918	0.0175599	0	0	0	0	0.227991	0	0	0.307387	0	0
Apicomplexa	0.111779	0	0	0	0	0	0	0	0	0	0	0	0	0	0	0	0	0	0	0	0	0	0	0	0	0	0	0.21733	0	0	0	0	0	0	0	0	0	0	0	0	0	0	0	0	0	0	0	0	0
Aquificae	0	0	0	0	0	0	0	0	0	0	0	0	0	0	0	0	0	0	0	0	0	0	0	0	0	0	0	0	0	0	0	0	0	0	0	0	0	0	0	0	0	0	0	0	0	0	0	0	0
Archaea_norank	0	0	0	0	0	0	0	0	0	0	0	0	0	0	0	0	0	0	0.754531	0	0	0	0	0	0	0	0	0	0	0	0	0	0	0	0	0	0	0	0	0	0	0	0	0	0	0	0	0	0
Armatimonadetes	0	0.0288106	0	1.51268	0	0.0259099	0.0723906	0.0404344	0	0	0.022841	0	0	0	0	0	0	0.605695	1.41213	0	0.703142	0	0.175366	0	0.0745403	0.0789917	2.30657	0.676741	1.84484	0.144803	2.07081	0	0	0.0157517	0.164145	3.50014	0.0455409	0.605752	0	0	0	0	0	0	0	0	0.00834106	0	0
Bacteria_norank	238.999	8.96159	0.175084	100.727	0	14.3329	23.1022	6.40934	0.138394	54.4153	2.30629	2.11005	13.6735	0.608082	0.0579545	0.701937	0	2.48768	15.4615	10.8253	102.184	0.0800286	66.4856	2.50621	0.440634	2.79303	0.248912	50.216	94.1057	2.35989	3.58618	0	0	0	21.7911	15.6147	4.32259	81.3347	0.0579545	0.0417864	0.0253622	0	0	0	0	0.0851534	34.6449	0	0.216115
Bacteroidetes	1102.72	152.975	0	507.438	0	246.767	125.599	0.626829	0.281836	282.051	0.376704	221.874	69.2481	77.3486	0	6.18785	0	150.914	481.436	164.861	1535.19	1.83019	313.359	18.3717	18.6158	177.176	63.0597	250.961	1365.94	25.857	24.9719	0	0	17.3761	228.933	482.918	216.469	345.076	0	42.8305	0.0304267	0	0.103887	6.97961	0.95863	16.1641	46.6582	3.05802	13.4798
Balneolaeota	0.150274	0.0455852	0	0.083125	0	0	0	0	0	0.11676	0	0	0	0	0	0	0	0	0	0	0.145605	0	0	0	0	0	0	0.750707	0	0	0	0	0	0	0	0	0	0	0	0	0	0	0	0	0	0	0	0	0
Caldiserica	0	0	0	0	0	0	0	0	0	0	0	0	0	0	0	0	0	0	0	0	0	0	0	0	0	0	0	0	0	0	0	0	0	0	0	0	0	0	0	0	0	0	0	0	0	0	0	0	0
Calditrichaeota	0	0.671971	0	0.329699	0	0	0.122475	0	0	0	0	0	0	0	0	0	0	0	0.202527	0	0.156351	0	0	0	0	0	0	0.0207885	0	0	0.0186031	0	0	0	0	0	0	0.585443	0	0	0	0	0	0	0	0	0	0	0
Candidatus Abyssubacteria	0	0	0	0	0	0	0	0	0	0	0	0	0	0	0	0	0	0	0	0	0.0185602	0	0	0	0	0	0	0	0	0	0	0	0	0	0	0	0	0	0	0	0	0	0	0	0	0	0	0	0
Candidatus Aenigmarchaeota	0	0	0	0	0	0	0	0	0	0	0	0	0	0	0	0	0	0	0	0	0	0	0	0	0	0	0	0	0	0	0	0	0	0	0	0	0	0	0	0	0	0	0	0	0	0	0	0	0
Candidatus Aerophobetes	0	0	0	0.0519606	0	0	0	0	0	0	0	0	0	0	0	0	0	0	0	0	0	0	0	0	0	0	0	0	0	0	0	0	0	0	0	0	0	0.0520943	0	0	0	0	0	0	0	0	0	0	0
Candidatus Aminicenantes	0.0179699	0	0	0	0	0	0	0	0	0	0	0	0	0	0	0	0	0	0.0392009	0	0	0	0	0	0.0451041	0.0349376	0	0	0	0.0676679	0	0	0	0	0	0	0	0.168092	0	0	0	0	0	0	0	0	0	0	0
Candidatus Atribacteria	0	0	0	0	0	0	0	0	0	0	0	0	0	0	0	0	0	0	0	0	0	0	0	0	0	0	0	0	0	0	0.0192206	0	0	0	0	1.09266	0	0	0	0	0	0	0	0	0	0	0	0	0
Candidatus Bathyarchaeota	0.263899	0	0	0.137302	0	0	0	0	0	0	0	0	0	0	0	0	0	0	0	0	0.0339565	0	0	0	0.946382	0	0	0	0.133026	0	0.155708	0	0	0	0	0	0	0.714568	0	0	0	0	0	0	0	0	0	0	0
Candidatus Berkelbacteria	0	0	0	0.131194	0	0	0	0	0	0	0	0	0	0	0	0	0	0	0	0	0	0	0	0	0	0	0	0	0	0.290881	0	0	0	0	0	0	0	0	0	0	0	0	0	0	0	0	0	0	0
Candidatus Campbellbacteria	0	0	0	0	0	0	0	0	0	0	0	0	0	0	0	0	0	0	0	0	0	0	0	0	0	0	0	0	0	0	0	0	0	0	0	0	0	0	0	0	0	0	0	0	0	0	0	0	0
Candidatus Cloacimonetes	0	0	0	0	0	0	0	0	0	0	0	0	0	0	0	0	0	0	0	0	0	0	0	0	0	0	0	0.0623454	0	0	0	0	0	0	0	0	0	0	0	0	0	0	0	0	0	0	1.09855	0	0
Candidatus Cryosericota	0	0	0	0	0	0	0	0	0	0	0	0	0	0	0	0	0	0	0	0	0	0	0	0	0	0	0	0.0131581	0	0	0	0	0	0	0	0	0	0	0	0	0	0	0	0	0	0	0	0	0
Candidatus Dadabacteria	0	0	0	0	0	0	0	0	0	0	0	0	0	0	0	0	0	0	0	0	0	0	0	0	0	0	0	0	0	0	0	0	0	0	0	0	0	0	0	0	0	0	0	0	0	0	0	0	0
Candidatus Desantisbacteria	0	0	0	0.0430623	0	0	0	0	0	0	0	0	0	0	0	0	0	0	0	0	0	0	0.0372263	0	0.178628	0.172751	0	0	1.95426	0	0.30462	0	0	0	0	0	0	0.0107789	0	0	0	0	0	0	0	0	0	0	0
Candidatus Falkowbacteria	0	0	0	0.645537	0	0	0	0	0	0	0	0	0	0	0	0	0	0	0	0	0	0	0	0	0	0	0	0	0	0	0	0	0	0	0	0	0	0	0	0	0	0	0	0	0	0	0	0	0
Candidatus Firestonebacteria	0	0	0	0	0	0	0	0	0	0	0	0	0	0	0	0	0	0	0.0288137	0	0	0	0	0	0	0	0	0	0	0	0	0	0	0	0	0	0	0.0924207	0	0	0	0	0	0	0	0	0	0	0
Candidatus Glassbacteria	0	0	0	0	0	0	0	0	0	0	0	0	0	0	0	0	0	0	0	0	0	0	0	0	0	0	0	0	0	0	0	0	0	0	0	0	0	0	0	0	0	0	0	0	0	0	0.124041	0	0
Candidatus Goldbacteria	0	0	0	0.58863	0	0	0	0	0	0	0	0	0	0	0	0	0	0	0	0	0	0	0	0	0	0	0	0	0	0	0	0	0	0	0	0	0	0	0	0	0	0	0	0	0	0	0	0	0
Candidatus Handelsmanbacteria	0	0	0	0	0	0	0	0	0	0	0	0	0	0	0	0	0	0	0	0	0	0	0	0	0	0	0	0	0	0	0	0	0	0	0	0	0	0	0	0	0	0	0	0	0	0	0	0	0
Candidatus Hydrogenedentes	0	0	0	0	0	0.131819	0.411505	0	0	0	0	0	0	0	0	0	0	0	0	0	0	0	0	0	0	0	0	0	0	0	0	0	0	0	0	0	0	0	0	0	0	0	0	0	0	0	0	0	0
Candidatus Hydrothermae	0	0	0	0	0	0	0	0	0	0	0	0	0	0	0	0	0	0	0	0	0	0	0	0	0	0	0	0	0	0	0	0	0	0	0	0	0	0	0	0	0	0	0	0	0	0	0	0	0
Candidatus Korarchaeota	0	0	0	0.0125957	0	0	0	0	0	0	0	0	0	0	0	0	0	0	0	0	0	0	0	0	0	0	0	0	0	0	0	0	0	0	0	0	0	0	0	0	0	0	0	0	0	0	0	0	0
Candidatus Kryptonia	0.110395	0	0	0	0	0	0	0	0	0	0	0	0	0	0	0	0	0	0	0	0	0	0	0	0	0	0	0	0	0	0	0	0	0	0	0	0	0	0	0	0	0	0	0	0	0	0	0	0
Candidatus Latescibacteria	0	0	0	0.193932	0	0	0	0	0	0	0	0	0	0	0	0	0	0.32463	0	0	0.147093	0	0	0	0.320718	0.160033	0	0	0.0463064	0	0	0	0	0.201278	0	0	0	0.0651758	0	0	0	0	0	0	0	0	0	0	0
Candidatus Levybacteria	0	0	0	0	0	0	0	0	0	0	0	0	0	0	0	0	0	0	0	0	0	0	0	0	0	0	0	0	0	0	0	0	0	0	0	0	0	0	0	0	0	0	0	0	0	0	0	0	0
Candidatus Lokiarchaeota	0	0	0	0	0	0	0	0	0	0	0	0	0	0	0	0	0	0	0.138059	0	0	0	0	0	0	0	0	0	0.0158412	0	0	0	0	0	0	0	0	0	0	0	0	0	0	0	0	0	0	0	0
Candidatus Marinimicrobia	0.340627	0.0520491	0	0.141024	0	0	0	0	0	0	0	0	0	0	0	0	0	0	0	0	0.559837	0	0	0	0	0	0	0.0167037	0	0	0	0	0	0	0	0	0	0.131934	0	0	0	0	0	0	0	0	1.07387	0	0
Candidatus Melainabacteria	2.7355	0.030513	0	0	0	0	0	0	0	0	0	0	0	0	0.0373612	0	0	0	0	0.248102	0.352037	0	0	0	0	0	0	0.0201126	0	0.0365944	0	0	0	0	0	0	0	0	0.0373612	0	0	0	0	0	0	0	0	0	0
Candidatus Microgenomates	0	0	0	0	0	0	0	0	0	0	0	0	0	0	0	0	0	0	0	0	0	0	0	0	0	0	0	0	0	0	0	0	0	0	0	0.931025	0	0	0	0	0	0	0	0	0	0	0	0	0
Candidatus Moranbacteria	0	0	0	0	0	0.203034	0	0	0	0	0	0	0	0	0	0	0	0	0	0	0	0	0	0	0	0	0	0	0	0	0	0	0	0	0	0.207983	0	0.0297921	0	0	0	0	0	0	0	0	0	0	0
Candidatus Nealsonbacteria	0	0	0	0	0	0	0	0	0	0	0	0	0	0	0	0	0	0.207348	0	0	0	0	0	0	0	0	0	0	0	0	0	0	0	0	0	0	0	0	0	0	0	0	0	0	0	0	0	0	0
Candidatus Nomurabacteria	0	0.0282809	0	2.04014	0	0	0	0	0	0	0	0	0	0	0	0	0	0.0419094	0	0	0.228713	0	0	0	0	0.0724279	0	0	0	0.0197161	0	0	0	0	0	17.8978	0	0.51889	0	0	0	0	0	0	0	0	0	0	0
Candidatus Omnitrophica	0	0	0	0.698569	0	0	0.131073	0	0	0	0	0	0	0	0	0	0	0.00729394	0	0	0	0	0	0	0	0.478027	0.608272	0.27009	0.0333481	0.0592996	0	0	0	0	0	1.69057	0	0.399191	0	0	0	0	0	0	0	0	0.00942519	0	0
Candidatus Parcubacteria	0	0	0	0.0303358	0	0	0	0	0	0	0	0	0	0	0	0	0	0	0	0	0	0	0	0	0	0	0	0	0	0	0	0	0	0	0	0	0	0	0	0	0	0	0	0	0	0	0	0	0
Candidatus Poribacteria	0	0	0	0	0	0.0576469	0	0	0	0	0	0	0	0	0	0	0	0	0	0	0.710945	0	0	0	0	0.0643973	0.143037	0	0.0179564	0.0194056	0	0	0	0	0	0	0	0.342016	0	0	0	0	0	0	0	0	0.0663054	0	0
Candidatus Raymondbacteria	0	0	0	0	0	0.0354161	0	0	0	0	0	0	0	0	0	0	0	0	0	0	0	0	0	0	0.0417993	0	0	0	0.0348416	0	0	0	0	0	0	0.104951	0	0	0	0	0	0	0	0	0	0	0	0	0
Candidatus Roizmanbacteria	0	0	0	0	0	0	0	0	0	0	0	0	0	0	0	0	0	0	0	0	0	0	0	0	0	0	0	0	0	0	0	0	0	0	0	0	0	0	0	0	0	0	0	0	0	0	0	0	0
Candidatus Rokubacteria	0	0	0	0	0	0	0.0260196	0	0	0	0	0	0	0	0	0	0	0	0	0	0	0	0	0	0	0	0	0	0	0	0	0	0	0	0	0	0	0	0	0	0	0	0	0	0	0	0	0	0
Candidatus Saccharibacteria	0	0	0	0.955491	0	0	0	0	0	0	0	0	0	0	0	0	0	0	0	0	0.0218741	0	0	0	0	0	0	0.677397	0	0	0	0	0	0	0	0	0	0	0	0	0	0	0	0	0	0	0	0	0
Candidatus Schekmanbacteria	0	0	0	0	0	0	0	0	0	0	0	0	0	0	0	0	0	0	0	0	0	0	0	0	0	0	0	0	0	0	0	0	0	0	0	0	0	0	0	0	0	0	0	0	0	0	0	0	0
Candidatus Sumerlaeota	0	0	0	0.342547	0	0	0	0	0	0	0	0	0	0	0	0	0	0	0.0190001	0.0301247	0.178411	0	0	0	0	0	0	0	0	0.221119	0	0	0	0	0	0.0177434	0	0	0	0	0	0	0	0	0	0	0	0	0
Candidatus Thorarchaeota	0	0	0	0	0	0	0	0	0	0	0	0	0	0	0	0	0	0	0.0186474	0	0	0	0	0	0	0	0	0	0	0	0	0	0	0	0	0	0	0	0	0	0	0	0	0	0	0	0	0	0
Candidatus Uhrbacteria	0	0	0	0	0	0	0	0	0	0	0	0	0	0	0	0	0	0	0	0	0	0	0	0	0	0	0	0	0	0	0	0	0	0	0	0.628193	0	0	0	0	0	0	0	0	0	0	0	0	0
Candidatus Wallbacteria	0	0	0	0	0	0	0	1.21823	0	0	0	0	0	0	0	0	0	0	0	0	0	0	0	0	0	0	0	0	0	0	0	0	0	0	0	0	0	0	0	0	0	0	0	0	0	0	0.772128	0	0
Candidatus Woesearchaeota	0	0	0	0	0	0	0	0	0	0	0	0	0	0	0	0	0	0	0	0	0	0	0	0	0	0	0	0	0	0	0	0	0	0	0	0	0	0	0	0	0	0	0	0	0	0	0	0	0
Candidatus Woykebacteria	0	0	0	0	0	0	0.0247169	0	0	0	0	0	0	0	0	0	0	0	0	0	0	0	0	0	0	0	0	0	0	0	0	0	0	0	0	0	0	0	0	0	0	0	0	0	0	0	0	0	0
Candidatus Zambryskibacteria	0	0	0	0	0	0	0	0	0	0	0	0	0	0	0	0	0	0	0	0	0	0	0	0	0	0	0	0	0	0	0	0	0	0	0	0	0	0	0	0	0	0	0	0	0	0	0	0	0
Chlamydiae	0	0	0	0.0715531	0	0	0	0	0	0	0	0	0	0	0	0	0	0	0	0	0.244376	0	0	0	0	0	0.0245007	0	0.171867	0	0.1045	0	0	0	0	0	0	0	0	0	0	0	0	0	0	0	0	0	0
Chlorobi	0.213336	0	0	0	0	0	0	0	0	0	0	0	0	0	0	0	0	0	0	0	0.880549	0	0	0	0	0	0.0315481	0	0	0	0	0	0	0	0	0	0	0	0	0	0	0	0	0	0	0	1.87538	0	0
Chloroflexi	1.24407	0.129778	0	3.86217	0	0.0639137	0.24354	0.364392	0	0.0646392	0	0	0	0	0	0	0	0.18922	1.65837	0.395159	6.70369	0	1.51513	0	0.659609	2.83148	0.205558	0.949721	1.60178	1.22123	0.601863	0	0	0.67028	0.262172	0.144452	2.08337	1.81391	0	0	0	0	0	0	0	0	0.287905	0	0.092231
Ciliophora	0	0	0	171.028	0	18.0293	0	0	0	33.2754	16.2191	0	0	0	0	0	0	0	24.5689	0	0	0	0	0	0	0	0	2.42293	0	0	0	0	0	0	0	0	0	0	0	0	0	0	0	0	0	0	0.577602	0	0
Coprothermobacterota	0.0572864	0	0	0	0	0	0	0	0	0	0	0	0	0	0	0	0	0	0	0	0	0	0	0	0	0	0	0	0	0	0	0	0	0	0	0	0	0	0	0	0	0	0	0	0	0	0	0	0
Crenarchaeota	4.983	0	0	0.619316	0	0	0	0	0	0	0	0	0	0	0	0	0	0	0.20783	0	0	0	0	0	0	0	0.202496	0	0	0.0131466	0.179838	0	0	0.0443462	0	0.0155314	0.0420463	0	0	0	0	0	0	0	0	0	0	0	0
Cyanobacteria	0.81601	0	0	0.0204101	0	0.242097	0	0	0	0.0827727	0	0	0	0	0	0	0	0	0	0.985305	0	0	0	0	0	0	0.0557444	0.145174	0	0	0	0	0	0	0	0	0	0.025807	0	0	0	0	0	0	0	0	0.205685	0	0
Deferribacteres	0.268921	0	0	0	0	0	0	0	0	0	0	0	0	0	0	0	0	0	0	0	0	0	0	0	0	0	0	0	0	0	0	0	0	0	0	0	0	0	0	0	0	0	0	0	0	0	0	0	0
Deinococcus-Thermus	0	0	0	0.064341	0	0	0	0.0511911	0	0.0212867	0	0	0	0	0	0	0	0	0	0	0.197045	0	0	0	0	0	0	0	0.48279	0	0	0	0	0	0.0107091	0	0	0.0764687	0	0	0	0	0	0	0	0	0	0	0
Dictyoglomi	0.0348084	0	0	1.78279	0	0	0	0.0958651	0	0.469969	0	0	0	0	0	0	0	0	0	0	0	0	0	0	0	0	0	0	0.0247479	0	0	0	0	0	0	0.178579	0	0.0332955	0	0	0	0	0	0	0	0	0	0	0
Discosea	0	0	0	0	0	0	0	0	0	0	0	0	0	0	0	0	0	0	0	0	0	0	0	0	0	0	0	0	0	0	0	0	0	0	0	0	0	0	0	0	0	0	0	0	0	0	0	0	0
Elusimicrobia	0.777739	0.0909493	0	0.228305	0	0.0900326	0.165478	0	0	0	0	0	0	0	0	0	0	0.0796606	0.761571	0	0	0	0	0	0	1.09968	0.0648916	0	0	0	0	0.0712834	0	0	0	0.0817537	0.0147952	2.12832	0	0	0	0	0	0	0	0	0.0126046	0.143205	0
Eukaryota_norank	0	0	0	0.563888	0	0	0	0	0	0	0	0	0	0	0	0	0	0	4.21008	0.0353586	0	0	0	0	0	0	0	0.0123294	0	0.0203942	0	0	0	0	0	0	0	0	0	0	0.0462897	0	0	0	0	0	0	0	0
Endomyxa	0	0	0	0	0	0	0	0	0	0	0	0	0	0	0	0	0	0	0	0	0	0	0	0	0	0	0	0	0	0	0	0	0	0	0	0	0	0	0	0	0	0	0	0	0	0	0	0	0
Euglenozoa	0	0	0	0	0	0	0	0	0	0	0	0	0	0	0	0	0	0	0	0	0	0	0	0	0	0	0	0	0	0	0	0	0	0	0	0	0	0	0	0	0	0	0	0	0	0	0	0	0
Eukaryota_norank	0	0	0	0.563888	0	0	0	0	0	0	0	0	0	0	0	0	0	0	4.21008	0.0353586	0	0	0	0	0	0	0	0.0123294	0	0.0203942	0	0	0	0	0	0	0	0	0	0	0.0462897	0	0	0	0	0	0	0	0
Euryarchaeota	0.200072	0	0	0.584501	0	0	0	0	0.0886803	0	0	0	0	0	0	0.695176	0	0	0.0846315	0	0.0400484	0	0	0	0	0.0189354	0	0.643773	0.286939	0.233827	0.545939	0	0	0	0.0439501	0.562274	0.196823	0.0209487	0	0	0	0	0	0	0	0	0	0	0
Evosea	0.0177156	0	0	0.0390821	0	0	0	0	0	0	0	0	0	0	0	0	0	0	4.02398	0	0	0	0	0	0	0	0	0.616034	0	0	0.421474	0	0	0	0	0	0	0	0	0	0	0	0	0	0	0	0.0133873	0	0
Fibrobacteres	9.01912	10.2247	0	30.8365	0	18.4381	2.75377	0	0	16.3143	12.7318	0	0	19.1885	0	0	0	2.30855	0	0	34.6178	2.57559	1.53923	1.67381	3.66339	0	5.47089	17.227	7.32043	9.41515	0	0	0	0	0	0	3.7093	0	0	0	0	61.8155	0	0.673314	0	0	2.24204	0	0
Firmicutes	1185.76	163.44	5.13343	504.915	0	157.451	305.833	174.179	27.0866	216.59	45.6468	47.2923	29.891	36.7683	0.854203	77.7462	0.129828	102.919	413.824	102.206	832.144	6.23455	212.269	0	73.6389	161.44	150.538	272.495	1218.41	270.933	121.633	0.729417	0.0909495	32.2767	122.251	311.497	82.3025	612.149	0.854203	6.12889	0.95807	0.226411	0.10559	17.4584	7.64209	4.48533	62.3861	2.35521	45.535
Foraminifera	0	0	0	0	0	0	0	0	0	0	0	0	0	0	0	0	0	0	0	0	0	0	0	0	0	0	0	0	0	0	0	0	0	0	0	0	0	0	0	0	0	0	0	0	0	0	0	0	0
Fungi	53.2707	9.38504	0.227742	12.5654	0.665574	57.1027	0	0.25985	2.50401	0.14132	8.74458	5.64857	0	0.808688	0	3.76062	0	0	4.23344	0.0598992	5.13512	0	0	0	0	0	0.0342527	3.81585	0.0901841	10.2474	0	0	0	1.70362	0.355524	0.259723	1.61831	1.5698	0	0	0	0	0	0	0.0551462	0	0	0	0
Fusobacteria	0.0218714	0.013823	0	0	0	0	0	0	0	0	0	0	0	0	0	0	0	0	0.377134	0.191278	0	0	0	0	0	0	0	0	0.470346	0	0	0	0	0	0	0	0	0	0	0	0	0	0	0	0	0	0	0	0
Gemmatimonadetes	0.0413657	0	0	0.1705	0	0	0.0237724	0	0	0	0	0	0	0	0	0	0	0	0	0	0.0275404	0	0	0	0.0782944	0	0	0	0.440579	0	0	0	0	0.0712701	0	0	0	0.0587175	0	0	0	0	0	0	0	0	0.0805765	0	0
Heterolobosea	0	0	0	0	0	0	0	0	0	0	0	0	0	0	0	0	0	0	1.67057	0	0	0	0	0	0	0	0.0627465	0	0	0	0	0	0	0	0	0	0	0	0	0	0	0	0	0	0	0	0	0	0
Ignavibacteriae	0.0591597	0	0	0.175455	0	0	3.46106	0	0	0	0	0	0	0	0	0	0	0	4.04117	0	0.138887	0	0	0	0	0	0	0.568286	0.476003	0.0241563	0	0	0	0	0.0100617	0	3.02329	0.146771	0	0	0	0	0	0	0	0	0.0627443	0	0
Kiritimatiellaeota	0.0922664	0	0	0.11213	0	0.0248077	0.760719	0.0340411	0	0	0	0.331709	0	0	0	0.0264549	0	0.0104561	0	0	0.0912653	0	0	0	0	0.146555	0.0463449	0.0224426	0.7253	0	0.0469936	0	0	0	0.176292	0.248993	0	0.246302	0	0	0	0	0	0.140702	0	0	0	0	0
Lentisphaerae	0.973324	0.112597	0	28.5029	0	3.49834	3.76413	0.188926	0	3.65984	0	0.454953	0	0	0	0	0	3.45492	0.522899	0.270735	6.66566	0	0.416831	0	0.44626	6.8798	2.98891	7.32551	4.62778	25.2027	4.83589	0	0	0.382311	0.744068	12.3079	0.0906445	5.66208	0	0.168016	0	0	0	0.372211	0	0	0.791713	0	0
Metazoa	0	0	0	0.120953	0	0	0	0.0888068	0	0	0.114526	0	0	0	0	0	0	0	25.4346	0.0109835	9.47847	0	0	0	0	0	0	0.183568	0	0	0	0	0	0	0	0	0	2.56531	0	0	0	0	0	0	0	0	0.0199012	0	0
NULL-Domain_Unclassified	0.463973	1.64894	0	11.2223	0	0.45253	0.0147973	0.0208716	13.5919	1.96003	1.03554	0	0	0	0.862598	0.560783	0	0.0145989	0.106852	0	3.16763	0	0.316385	0	0.157334	0	4.13485	13.1244	0.0527986	2.01996	1.17784	0	0	2.16164	0.07659	4.32993	0.227994	0.420727	0.862598	0.584418	0.0225649	0.116045	0	0.170279	0	0.136454	16.8496	0	0
Nitrospinae	0	0	0	0	0	0	0	0	0	0	0	0	0	0	0	0	0	0	0	0	0	0	0	0	0	0	0	0	0	0	0	0	0	0	0	0	0	0	0	0	0	0	0	0	0	0	0	0	0
Nitrospirae	0.0308735	0	0	0	0	0	0	0	0	0	0	0	0	0	0	0	0	0	0	0	0	0	0	0	0	0	0.101112	0	0	0	0	0	0	0	0	0	0	0	0	0	0	0	0	0	0	0	0	0	0
Parabasalia	0	0	0	0	0	0	0	0	0	0	0	0	0	0	0	0	0	0	0	0.00988287	0	0	0	0	0	0	0.642906	0	7.65992	0	0	0	0	0	0	0.665941	0	0	0	0	0	0	0	0	0	0	0	0	0
Planctomycetes	0.998312	0	0	10.8285	0	0.0979153	0.0259302	0.0473306	0	0.541945	0	0	0	0	0	3.25705	0	1.64696	0.34121	0.0523798	4.63018	0	7.04668	0	0.297696	3.83511	5.53309	2.96443	11.5017	1.58615	3.4778	0	0.0687777	1.55771	0.123257	8.21714	3.41698	5.15134	0	0	0	0	0	0.379355	0	0	0.6455	0	0
Preaxostyla	0	0	0	0	0	0	0	0	0	0	0	0	0	0	0	0	0	0	0	0	0	0	0	0	0	0	0	0	0	0	0	0	0	0	0	0	0	0	0	0	0	0	0	0	0	0	0	0	0
Proteobacteria	9.88606	0.219118	0	2.27433	0	0.689597	4.29946	2.2802	0	0.199664	0.0299667	0.193968	0	2.23973	0	0.188038	0	0.675483	1.03751	1.3111	8.42732	0.024858	0.622551	0.150828	0.159319	0.829522	0.982824	2.65662	13.1841	2.12515	2.49187	0	0	0.334732	1.19043	0.847709	0.915155	3.94228	0	0.0526561	0.691726	0	0	0.160846	0.0299104	0	1.69038	0	1.36649
Rhodophyta	0	0	0	0	0	0	0	0	0	0	0	0	0	0	0	0	0	0	0	0	0	0	0	0	0	0	0	0	0	0	0	0	0	0	0	0	0	0	0	0	0	0	0	0	0	0	0	0	0
Rhodothermaeota	0	0	0	0.201955	0	0	0	0	0	0.01967	0	0	0	0	0	0	0	0	0	0	0	0	0	0	0	0	0	0	0	0	0	0	0	0	0	0	0	0	0	0	0	0	0	0	0	0	0	0	0
Spirochaetes	43.8089	13.3502	0	81.4202	0	6.16797	18.7842	7.04379	0	39.235	0.570837	7.74514	0.213424	6.68669	0.0141028	10.3062	0	6.5429	16.4698	6.38606	81.6369	0	13.4738	0	0.529837	3.87927	0	17.6146	42.2832	5.30459	0.355606	0	0	0	8.31537	4.06635	6.69356	1.19779	0.0141028	0.0762231	1.31019	0	0	0	1.04193	0	0.353726	0	0
Synergistetes	0.0158939	0	0	0	0	0	0	0	0	0	0	0	0	0	0	0	0	0	0	0	0	0	0	0	0	0	0	0	0	0	0	0	0	0	0	0	0	0	0	0	0	0	0	0	0	0	0	0	0
Tenericutes	29.3574	0	0	2.73906	0	0	2.15145	0.893804	0	4.28107	0	0.0749682	0	0	0.0384995	0	0	0	29.0611	0	2.05768	0	0	0	0	0	0	0.379079	0.486768	0.0585091	0.219675	0	0	0.0897449	2.24962	1.3512	10.7875	0.120791	0.0384995	0	0	0	0	0	0	0.0213994	0.320288	0.258069	0.707885
Thaumarchaeota	0	0	0	0.19783	0	0	0	0	0	0	0	0	0	0	0	0	0	0	0	0	0	0	0	0	0	0	0	0	0	0	0	0	0	0	0	0	0	0	0	0	0	0	0	0	0	0	0	0	0
Thermotogae	23.6812	0.0869818	0	0.287882	0	0	0	0.314562	0	0.0634243	0	0	0	0	0	0	0	0	0.328661	0	0	0	0.0163858	0	0	0	0.075615	0.595536	0.076599	0	3.46844	0	0	0	0.026938	0.0272556	0.0241778	0.0299995	0	0	0	0	0	0	0	0	0	0	1.40324
Verrucomicrobia	13.4537	2.27621	0	7.18272	0	2.79102	2.44496	0.0269361	0.0149752	0.617406	0	0.278056	0	0.222951	0	0.0512591	0	0.410852	14.4461	10.8083	4.96985	0	0.361218	0	0.113592	2.17142	2.02298	21.1878	39.7057	2.80499	3.35099	0	0	0.394861	0.665187	6.85831	0	14.2572	0	0	0	0	0.0713851	0.144359	0	0	0.60676	0	0
Viridiplantae	0	0	0	0.0747381	0	0	0	0.0257591	0	0	0	0	0	0	0	0	0	0	1.15186	0	0.0387621	0	0	0	0	0	0	0.100654	0	0	0	0	0	0	0	0.0802201	0	0	0	0	0	0	0	0	0	0	0	0	0
Viruses_norank	0	0	0	0	0	0	0	0	0	0	0	0	0	0	0	0	0	0	0	0	0	0	0	0	0	0	0	0	0.109948	0	0	0	0	0	0	0.209699	0	0	0	0	0	0	0	0	0	0	0	0	0
candidate division Zixibacteria	0	0	0	0	0	0	0	0	0	0	0	0	0	0	0	0	0	0	0	0	0	0	0	0	0	0	0	0.032408	0	0	0	0	0	0	0	0	0	0	0	0	0	0	0	0	0	0	0	0	0
candidate division KD3-62	0	0	0	0	0	0	0	0	0	0	0	0	0	0	0	0	0	0	0	0	0	0	0	0	0	0	0.0180826	0	0.199313	0	0	0	0	0	0	0	0	0	0	0	0	0	0	0	0	0	0	0	0
candidate division WOR-3	0	0	0	0	0	0	0	0	0	0	0	0	0	0	0	0	0	0	0	0	0	0	0	0	0	0	0	0	0	0	0	0	0	0	0	0	0	0	0	0	0	0	0	0	0	0	0	0	0
[truncated: 72 more columns]

## Sheet: Genus
Genus	GH3	GH30	GH48	GH5	GH6	GH9	GH94	GH1	GH124	GH10	GH11	GH115	GH67	GH8	GH12	GH120	GH121	GH146	GH31	GH35	GH43	GH44	GH51	GH54	GH116	GH127	GH141	GH16	GH2	GH39	GH42	GH52	GH62	GH93	GH105	GH28	GH53	GH78	GH12	GH128	GH17	GH45	GH49	GH55	GH64	GH66	GH74	GH81	GH144
Abditibacterium	0	0	0	0	0	0	0	0	0	0.021347	0	0	0	0	0	0	0	0	0	0	0	0	0	0	0	0	0	0	0	0.0249238	0	0	0	0	0	0	0	0	0	0	0	0	0	0	0	0	0	0	0
Absiella	0.117969	0	0	0	0	0	0	0.64617	0	0	0	0	0	0	0	0	0	0	0	0	0	0	0	0	0	0	0	0	0	0	0	0	0	0	0	0	0	0.0315729	0	0	0	0	0	0	0	0	0	0	0
Acanthamoeba	0	0	0	0	0	0	0	0	0	0	0	0	0	0	0	0	0	0	0	0	0	0	0	0	0	0	0	0	0	0	0	0	0	0	0	0	0	0	0	0	0	0	0	0	0	0	0	0	0
Acetanaerobacterium	0.172382	0	0	0	0	0	0	0	0	0	0	0	0	0	0	0	0	0	0	0	0	0	0.159217	0	0	0	0	0	2.00782	0	0	0	0	0	0	0	0	0	0	0	0	0	0	0	0	0	0	0	0
Acetatifactor	5.88044	0	0	0	0	0	0	0	0	0.0819948	0	0.126416	0	2.37351	0	0.187727	0	0.0359871	0.0910673	0.0647555	2.60108	0	2.22071	0	0	0.0692853	0	0	1.19009	0.735711	0.0924375	0	0	0	2.28804	3.39211	0	2.91777	0	0	0	0	0	0	0	0	0	0	0
Acetitomaculum	0	0	0	0	0	0	0	0	0	0	0	0	0	0	0	0	0	0	0	0	0	0	0	0	0	0	0	0	0	0	0	0	0	0	0	0	0	0	0	0	0	0	0	0	0	0	0	0	0
Acetivibrio	0	0	0	0	0	0	0	0.0955412	0	0	0	0	0	0	0	0	0	0	0	0	0	0	0	0	0	0	0	0	0	0	0	0	0	0	0	0	0	0	0	0	0	0	0	0	0	0	0	0	0
Acetoanaerobium	0	0	0	0	0	0	0	0	0	0	0	0	0	0	0	0	0	0	0	0	0	0	0	0	0	0	0	0	0	0	0	0	0	0	0	0	0	0	0	0	0	0	0	0	0	0	0	0	0
Acetobacter	0	0	0	0	0	0	0	0	0	0	0	0	0	0	0	0	0	0	0	0	0	0	0	0	0	0	0	0	0	0	0	0	0	0	0	0	0	0	0	0	0	0	0	0	0	0	0	0	0
Acetobacterium	0	0	0	0.336275	0	0	0	0	0	0	0	0	0	0	0	0	0	0	0	0	0	0	0	0	0	0	0	0	0	0	0	0	0	0	0	0	0	0	0	0	0	0	0	0	0	0	0	0	0
Acetobacteroides	0	0	0	0	0	2.35498	0	0	0	0	0	0	0	0	0	0	0	0	0	0	0	0	0	0	0	0	0	0	0	0	0	0	0	0	0	0	0	0	0	0	0	0	0	0	0	0	0	0	0
Acetonema	0	0	0	0	0	0	0	0	0	0	0	0	0	0	0	0	0	0	0	0	0	0	0	0	0	0	0	0	0	0	0	0	0	0	0	0	0	0	0	0	0	0	0	0	0	0	0	0	0
Achlya	0	0	0	0	0	0	0	0	0	0	0	0	0	0	0	0	0	0	0	0	0	0	0	0	0	0	0	0	0	0	0	0	0	0	0	0	0	0	0	0	0	0	0	0	0	0	0	0	0
Acholeplasma	6.25733	0	0	0.0986257	0	0	0.0326574	0	0	0	0	0.0749682	0	0	0	0	0	0	10.0147	0	1.29512	0	0	0	0	0	0	0.0218811	0.0441517	0	0.219675	0	0	0	0.102848	0.424495	0	0.120791	0	0	0	0	0	0	0	0	0	0	0.0489874
Acholeplasmataceae_norank	1.32995	0	0	0	0	0	0	0	0	0	0	0	0	0	0	0	0	0	0.0385644	0	0.0319229	0	0	0	0	0	0	0	0	0	0	0	0	0	0.0260201	0	0	0	0	0	0	0	0	0	0	0	0	0	0.0294511
Acholeplasmatales_norank	2.45395	0	0	1.25502	0	0	0	0	0	0	0	0	0	0	0	0	0	0	0	0	0.681566	0	0	0	0	0	0	0.00503931	0	0.0585091	0	0	0	0	0.760195	0.786252	4.32142	0	0	0	0	0	0	0	0	0.0213994	0	0	0.140509
Acidaminobacter	0	0	0	0	0	0	0	0	0	0	0	0	0	0	0	0	0	0	0	0	0	0	0	0	0	0	0	0	0	0	0	0	0	0	0	0	0	0	0	0	0	0	0	0	0	0	0	0	0
Acidaminococcaceae_norank	0.643474	0	0	0	0	0	0	0	0	0	0	0	0	0	0	0	0	0	0	0	0	0	0	0	0	10.3137	0	0.0115409	0	0	0	0	0	0	0	0	0	0	0	0	0	0	0	0	0	0	0	0	0
Acidaminococcus	3.11466	0	0	0	0	0	0	0	0	0	0	0	0	0	0	0	0	0	0.0347029	0	0	0	0	0	0	0	0	0	0.152941	0.0402578	0	0	0	0	0	0	0	0	0	0	0	0	0	0	0	0	0	0	0
Acidibacillus	0	0	0	0	0	0	0	0	0	0	0	0	0	0	0	0	0	0	0	0	0	0	0	0	0	0	0	0	0	0	0	0	0	0	0	0	0	0	0	0	0	0	0	0	0	0	0	0	0
Acidiferrobacteraceae_norank	0	0	0	0	0	0	0	0	0	0	0	0	0	0	0	0	0	0	0	0	0	0	0	0	0	0	0	0	0	0	0	0	0	0	0	0	0	0	0	0	0	0	0	0	0	0	0	0	0
Acidimicrobiia_norank	0	0	0	0	0	0	0	0	0	0	0	0	0	0	0	0	0	0	0	0	0	0	0	0	0	0	0	0	0	0	0	0	0	0	0	0.998269	0	0	0	0	0	0	0	0	0	0	0	0	0
Acidiphilium	0	0	0	0	0	0	3.52841	0	0	0	0	0	0	0	0	0	0	0	0	0	0	0	0	0	0	0	0	0	5.42697	0	0	0	0	0	0	0	0	2.63043	0	0.0357421	0	0	0	0	0	0	0	0	0
Acidipila	0	0	0	0	0	0	0	0	0	0	0	0	0	0	0	0	0	0	0.0534788	0	0	0	0	0	0	0.0711009	0	0	0	0	0	0	0	0	0	0	0	0.0276135	0	0	0	0	0	0	0	0	0	0	0
Acidisarcina	0	0	0	0.016909	0	0	0	0	0	0	0	0	0	0	0	0	0	0.0166826	0	0	0	0	0	0	0	0	0	0	0	0	0	0	0	0	0	0	0	0	0	0	0	0	0	0	0	0	0	0	0
Acidithiobacillales_norank	0	0	0	0	0	0	0	0	0	0	0	0	0	0	0	0	0	0	0	0	0	0	0	0	0	0	0	0	0	0	0	0	0	0	0	0	0	0	0	0	0	0	0	0	0	0	0	0	0
Acidobacteria_norank	1.10954	0.098916	0	0.174234	0	0.420915	0.0313805	0.0835877	0	0	0	0	0	0	0	0.0323124	0	0.0268059	0.15161	0	0.163931	0	0.174748	0	0.158852	0.0917379	0.0789288	0.0540117	4.40404	0.0169122	0	0	0	0	0.042572	0	0	0.162462	0	0	0	0	0	0	0	0	0	0	0
Acidobacteriaceae_norank	0	0	0	0	0	0	0	0	0	0	0	0	0	0	0	0	0	0	0	0	0	0	0.068516	0	0	0	0	0	0	0	0	0	0	0	0	0	0	0	0	0	0	0	0	0	0	0	0	0	0
Acidobacteriales_norank	0	0.0580854	0	0	0	0	0	0	0	0	0	0	0	0	0	0	0	0	0	0.0754544	0.758593	0	0	0	0	0.0347607	0	0	0.238711	0	0	0	0	0	0	0	0	0.0279766	0	0	0	0	0	0	0	0	0	0	0
Acidobacteriia_norank	0	0.0653726	0	0	0	0	0	0	0	0	0	0	0	0	0	0	0	0	0	0	0	0	0	0	0	0	0	0	0	0	0	0	0	0	0	0	0	0.798097	0	0	0	0	0	0	0	0	0	0	0
Acidobacterium	0	0.104032	0	0.0276898	0	0	0	0	0	0	0	0	0	0	0	0	0	0	0.0593552	0	0	0	0	0	0	0	0	0	0.0969294	0	0	0	0	0	0	0	0	0	0	0	0	0	0	0	0	0	0	0	0
Acidovorax	0	0	0	0	0	0	0	0	0	0	0	0	0	0	0	0	0	0	0	0	0	0	0	0	0	0	0	0	0	0	0.192108	0	0	0	0	0	0	0	0	0	0	0	0	0	0	0	0	0	0
Aciduliprofundum	0	0	0	0	0	0	0	0	0	0	0	0	0	0	0	0	0	0	0	0	0	0	0	0	0	0	0	0	0	0	0	0	0	0	0	0	0	0	0	0	0	0	0	0	0	0	0	0	0
Acinetobacter	0	0	0	0	0	0	0	0	0	0	0	0	0	0	0	0	0	0	0	0	0	0	0	0	0	0	0	0	0	0	0	0	0	0	0	0	0	0.0119095	0	0	0	0	0	0	0	0	0	0	0
Acroporidae	0	0	0	0	0	0	0	0	0	0	0	0	0	0	0	0	0	0	1.0893	0	0	0	0	0	0	0	0	0	0	0	0	0	0	0	0	0	0	0	0	0	0	0	0	0	0	0	0	0	0
Actiniidae	0	0	0	0	0	0	0	0	0	0	0	0	0	0	0	0	0	0	0.160509	0	0	0	0	0	0	0	0	0	0	0	0	0	0	0	0	0	0	0	0	0	0	0	0	0	0	0	0	0	0
Actinoalloteichus	0	0	0	0	0	0	0	0	0	0	0	0	0	0	0	0	0	0	0	0	0.0300299	0	0	0	0	0	0	0	0	0	0	0	0	0	0	0	0	0	0	0	0	0	0	0	0	0	0	0	0
Actinobacillus	0	0	0	0	0	0	0	0	0	0	0	0	0	0	0	0	0	0	0	0	0	0	0	0	0	0	0	0	0	0	0	0	0	0	0	0	0	0	0	0	0	0	0	0	0	0	0	0	0
Actinobacteria_norank	0	0	0	0.0949337	0	0.012777	0	0	0	0	0	0	0	0	0	0	0	0	0	0.183827	2.12412	0	0	0	0	0	0	0.114333	0.0953215	0.158064	0	0	0	0	0	0	0	0.0359849	0	0	0	0	0	0	0	0	0	0	0
Actinocorallia	0	0	0	0	0	0	0	0	0	0	0	0	0	0	0	0	0	0	0	0	0.0388455	0	0	0	0	0	0	0	0	0	0	0	0	0	0	0	0	0	0	0	0	0	0	0	0	0	0	0	0
Actinocrispum	0	0	0	0	0	0	0	0	0	0	0	0	0	0	0	0	0	0	0	0	0	0	0	0	0	0	0	0	0	0	0	0	0	0	0	0	0	0	0	0	0	0	0	0	0	0	0	0	0
Actinokineospora	0	0	0	0	0	0	0	0	0	0	0	0	0	0	0	0	0	0	0	0	0	0	0	0	0	0	0	0	0	0	0	0	0	0	0	0	0	0	0	0	0	0	0	0	0	0	0	0	0
Actinomadura	0	0	0	0	0	0	0	0	0	0	0	0	0	0	0	0	0	0	0	0	0	0	0.204425	0	0	0	0	0	0	0	0	0	0	0	0	0	0	0.121195	0	0	0	0	0	0	0	0	0	0	0
Actinomyces	0.0980901	0	0	0	0	0	0	0	0	0	0	0	0	0	0	0	0	0	0	0	0	0	0	0	0	0	0	0.0515837	0.0593884	0	0	0	0	0	0	0	0	0.0720661	0	0	0	0	0	0	0	0	0.048718	0	0
Actinomycetaceae_norank	0	0	0	0	0	0	0	0	0	0	0	0	0	0	0	0	0	0	0	0	0.0106396	0	0	0	0	0	0	0	0	0	0	0	0	0	0	0	0	0	0	0	0	0	0	0	0	0	0	0	0
Actinomycetales_norank	0	0	0	0	0	0	0	0	0	0	0	0	0	0	0	0	0	0	0	0	0	0	0	0	0	0	0	0	0	0	0	0	0	0	0	0	0	0	0	0	0	0	0	0	0	0	0	0	0
Actinophytocola	0	0	0	0	0	0	0	0	0	0	0	0	0	0	0	0	0	0	0	0	0	0	0	0	0	0	0	0	0	0	0	0	0	0	0	0	0	0	0	0	0	0	0	0	0	0	0	0	0
Actinoplanes	0	0	0	0	0	0.0455976	0	0	0	0	0	0	0	0	0	0	0	0	0	0	0.0927447	0	0	0	0	0	0	0	0	0	0	0	0	0	0	0	0	0	0	0	0	0	0	0	0	0	0.0145707	0	0
Actinopolymorpha	0	0	0	0	0	0	0	0	0	0	0	0	0	0	0	0	0	0	0	0	0	0	0	0	0	0	0	0	0	0.130517	0.252577	0	0	0	0	0	0	0.247284	0	0	0	0	0	0	0	0	0	0	0
Actinospica	0	0	0	0	0	0	0	0	0	0	0	0	0	0	0	0	0	0	0.0301436	0	0	0	0	0	0	0	0	0	0	0	0	0	0	0	0	0	0	0	0	0	0	0	0	0	0	0	0	0	0
Actinotalea	0	0	0	0	0	0	0	0	0	0	0	0	0	0	0	0	0	0	0	0	0.00996238	0	0	0	0	0	0	0	0	0	0	0	0	0	0	0	0	0	0	0	0	0	0	0	0	0	0	0	0
Actinotignum	0	0	0	0	0	0	0	0	0	0	0	0	0	0	0	0	0	0	0	0	0	0	0	0	0	0	0	0	0	0	0	0	0	0	0	0	0	0	0	0	0	0	0	0	0	0	0	0	0
Acutalibacter	1.88829	0	0	0.164349	0	0	0	0	0	0	0	0	0	0	0.0277862	0.164549	0	0.0150621	0.623906	1.48171	0.0780367	0	0.257535	0	0	1.30632	0	0.0230356	2.88749	0	0	0	0	0	0	1.53233	0	0.156857	0.0277862	0	0	0	0	0	0	0	0	0	0
Acytostelium	0	0	0	0	0	0	0	0	0	0	0	0	0	0	0	0	0	0	0.637573	0	0	0	0	0	0	0	0	0	0	0	0	0	0	0	0	0	0	0	0	0	0	0	0	0	0	0	0.0133873	0	0
Adhaeribacter	0	0	0	0.135934	0	0	0	0	0	0	0	0	0	0	0	0	0	0	0	0	0.154603	0	0	0	0	0.01891	0	0	0	0	0	0	0	0	0	0.0170513	0	0	0	0	0	0	0	0.131621	0	0	0	0	0
Adlercreutzia	0	0	0	0.0619083	0	0	0	0	0	0	0	0	0	0	0	0	0	0	0	0	0	0	0	0	0	0	0	0.0299066	0	0	0	0	0	0	0	0	0	0	0	0	0	0	0	0	0	0	0	0	0
Aequorivita	0	0	0	0	0	0	0	0	0	0	0	0	0	0	0	0	0	0	0	0	0	0	0	0	0	0	0	0	0	0	0	0	0	0	0	0	0	0	0	0	0	0	0	0	0	0	0.266106	0	0
Aeribacillus	0	0	0	0	0	0	0	0	0	0	0	0	0	0	0	0	0	0	0	0	0	0	0	0	0	0	0	0	0	0	0	0	0	0	0	0	0	0	0	0	0	0	0	0	0	0	0	0	0
Aerococcaceae_norank	0	0.268997	0	0	0	0	0	0	0	0	0	0	0	0	0	0	0	0	0	0	0	0	0	0	0	0	0	0	0	0	0	0	0	0	0	0	0	0	0	0	0	0	0	0	0	0	0	0	0
Aerococcus	0	0	0	0.0961937	0	0	0	0.0427877	0	0	0	0	0	0	0	0	0	0	0	0	0	0	0	0	0	0	0	0	0	0	0	0	0	0	0	0	0	0	0	0	0	0	0	0	0	0	0	0	0
Aeromonas	0	0	0	0	0	0	0	0	0	0	0	0	0	0	0	0	0	0	0	0	1.02046	0	0	0	0	0	0	0	0	0	0.0452318	0	0	0	0	0	0	0	0	0	0	0	0	0	0	0	0	0	0
Afipia	0.0347392	0	0	0	0	0	0	0	0	0	0	0	0	0	0	0	0	0	0	0	0	0	0	0	0	0	0	0	0	0	0	0	0	0	0	0	0	0	0	0	0.110417	0	0	0	0	0	0	0	0
Agamidae	0	0	0	0	0	0	0	0	0	0	0	0	0	0	0	0	0	0	0.141873	0	0	0	0	0	0	0	0	0	0	0	0	0	0	0	0	0	0	0	0	0	0	0	0	0	0	0	0	0	0
Agaonidae	0	0	0	0	0	0	0	0	0	0	0	0	0	0	0	0	0	0	0	0	0	0	0	0	0	0	0	0	0	0	0	0	0	0	0	0	0	0	0	0	0	0	0	0	0	0	0	0	0
Agaricaceae	0	0	0	0	0	0	0	0	0	0	0	0	0	0	0	0	0	0	0	0	0	0	0	0	0	0	0	0	0	0	0	0	0	0	0	0	0	0	0	0	0	0	0	0	0	0	0	0	0
Agarivorans	0	0	0	0	0	0	0	0	0	0	0	0	0	0	0	0	0	0	0	0	0	0	0	0	0	0	0	0	0	0	0	0	0	0	0	0	0	0	0	0	0	0	0	0	0	0	0	0	0
Agathobacter	0.0153112	0	0	0.531493	0	0	0	0	0	0	0	0	0	0	0	0	0	0	0.159361	0	0	0	0	0	0	0	0	0	0	0	0	0	0	0	0	0	0.0762901	0.0945228	0	0	0	0	0	0	0	0	0	0	0
Agathobaculum	0.091367	0	0	0	0	0	0	0.0969429	0	0	0	0	0	0	0	0	0	0	0	0	0	0	0	0	0	0	0	0	0	0.0485512	0	0	0	0	0	0	0	0	0	0	0	0	0	0	0	0	0	0	0
Agreia	0	0	0	0	0	0	0	0	0	0	0	0	0	0	0	0	0	0	0	0	0	0	0	0	0	0	0	0	0	0	0	0	0	0	0	0	0	0	0	0	0	0	0	0	0	0	0	0	0
Agromyces	0.0819855	0	0	0	0	0	0	0.0733654	0	0	0	0	0	0	0	0	0	0	0	0	0.264956	0	0	0	0	0	0.40708	0	0	0.0494149	0	0	0	0	0	0	0	0.00875681	0	0	0	0	0	0	0	0	0	0	0
Ahrensia	0	0	0	0	0	0	0	0	0	0	0	0	0	0	0	0	0	0	0	0	0	0	0	0	0	0	0	0	0	0	0	0	0	0	0	0	0	0	0	0	0	0	0	0	0	0	0	0	0
Aiptasiidae	0	0	0	0	0	0	0	0	0	0	0	0	0	0	0	0	0	0	0	0.0109835	0	0	0	0	0	0	0	0	0	0	0	0	0	0	0	0	0	0	0	0	0	0	0	0	0	0	0	0	0
Akkermansia	9.37645	0	0	0	0	0	0	0	0	0	0	0	0	0	0	0	0	0	10.5034	9.95455	0.008782	0	0	0	0	0.0411369	0	19.7884	30.612	0	0	0	0	0	0.0303327	0	0	5.34604	0	0	0	0	0	0	0	0	0	0	0
Aleyrodidae	0	0	0	0	0	0	0	0	0	0	0	0	0	0	0	0	0	0	0.0775779	0	0	0	0	0	0	0	0	0	0	0	0	0	0	0	0	0	0	0	0	0	0	0	0	0	0	0	0	0	0
Algibacter	0.237261	0	0	0	0	0	0	0	0	0	0	0.0185884	0	0	0	0	0	0	0	0	0.140946	0	0	0	0	0	0	0	0.0422189	0	0	0	0	0	0	0.573158	0	0	0	0	0	0	0	0	0	0	0	0	0
Algoriphagus	0	0	0	0	0	0	0.0334084	0	0	0	0	0	0	0	0	0	0	0	0.0125729	0	0.0628273	0	0	0	0	0	0	0.761668	0	0.0185934	0	0	0	0	0.0400881	0.0825896	0	0	0	0	0	0	0	0	0	0	0	0	0
Aliagarivorans	0	0	0	0	0	0	0	0	0	0	0	0	0	0	0	0	0	0	0	0	0	0	0	0	0	0	0	0	0	0	0	0	0	0	0	0	0	0	0	0	0	0	0	0	0	0	0	0	0
Alicyclobacillus	0.164776	0	0	0.0984516	0	0.066925	0	0.0316655	0	0.0288621	0	0	0	0	0	0	0	0	0.0320635	0	0	0	0.238362	0	0	1.00008	0	0	2.31469	0	0.127509	0	0	0	0	0	0	0.0539226	0	0	0	0	0	0	0	0	0	0	0
Aliifodinibius	0	0	0	0	0	0	0	0	0	0	0	0	0	0	0	0	0	0	0	0	0	0	0	0	0	0	0	0	0	0	0	0	0	0	0	0	0	0	0	0	0	0	0	0	0	0	0	0	0
Aliikangiella	0	0	0	0	0	0	0	0	0	0	0	0	0	0	0	0	0	0	0	0	0	0	0	0	0	0	0	0	0	0	0	0	0	0	0	0	0	0	0	0	0	0	0	0	0	0	0	0	0
Alistipes	48.7339	10.9198	0	20.7927	0	3.23729	0	0	0	0.325789	0	0.198346	0	0	0	0	0	4.62752	16.657	0	10.5274	0	0.342139	0	2.37281	13.7466	0.193994	5.56274	140.317	7.76906	1.76546	0	0	3.18778	29.396	20.2064	8.16227	35.9171	0	0	0	0	0	0	0	0.252414	0.593283	0	0
Aliterella	0	0	0	0	0	0	0	0	0	0	0	0	0	0	0	0	0	0	0	0	0	0	0	0	0	0	0	0	0	0	0	0	0	0	0	0	0	0	0	0	0	0	0	0	0	0	0.020037	0	0
Alkalibacter	0	0	0	0	0	0	0	0	0	0	0	0	0	0	0	0	0	0	0	0	0	0	0	0	0	0	0	0	0	0	0	0	0	0	0	0	0	0	0	0	0	0	0	0	0	0	0	0	0
Alkalibacterium	0.0455827	0.157224	0	0	0	0	0	0	0	0.0133865	0	0	0	0	0	0	0	0	0.0561217	0	0.0914263	0	0	0	0	0	0	0	0	0	0	0	0	0	0	0	0	0	0	0	0	0	0	0	0	0	0	0	0
Alkalibaculum	0.036829	0	0	0	0	0	0	0	0	0	0	0	0	0	0	0	0	0	0	0	0	0	0	0	0	0	0	0	0	0	0	0	0	0	0	0	0	0	0	0	0	0	0	0	0	0	0	0	0
Alkalicoccus	0	0	0	0	0	0	0	0	0	0	0	0	0	0	0	0	0	0	0	0	0	0	0	0	0	0	0	0	0	0	0	0	0	0	0	0	0	0.0435382	0	0	0	0	0	0	0	0	0	0	0
Alkaliflexus	0.00956519	0	0	0.0302529	0	0	0	0.0103535	0	0	0	0	0	0	0	0	0	0	0	0	0	0	0	0	0	0	0	0	0.0377841	0	0	0	0	0	0	0	0	0	0	0	0	0	0	0	0	0	0	0	0
Alkalilimnicola	0	0	0	0	0	0	0	0	0	0	0	0	0	0	0	0	0	0	0	0	0	0	0	0	0	0	0	0	0	0.0290019	0	0	0	0	0	0	0	0	0	0	0	0	0	0	0	0	0	0	0
Alkalinema	0	0	0	0	0	0	0	0	0	0	0	0	0	0	0	0	0	0	0	0	0	0	0	0	0	0	0	0	0	0	0	0	0	0	0	0	0	0	0	0	0	0	0	0	0	0	0	0	0
Alkaliphilus	0	0	0	0	0	0	0	0	0	0	0	0	0	0	0	0	0	0	0	0	0	0	0	0	0	0.004198	0	0	0	0	0	0	0	0	0	0	0	0	0	0	0	0	0	0	0	0	0	0	0.0504284
Alkalitalea	0	0	0	0	0	0	0	0	0	0	0	0	0	0	0	0	0	0	0	0	0.475045	0	0	0	0	0	0	0	0.138757	0	0	0	0	0	0	0	0	0	0	0	0	0	0	0	0	0	0	0	0
Alligatoridae	0	0	0	0	0	0	0	0	0	0	0	0	0	0	0	0	0	0	0.123822	0	0	0	0	0	0	0	0	0	0	0	0	0	0	0	0	0	0	0	0	0	0	0	0	0	0	0	0	0	0
Allobaculum	0.0933788	0	0	0	0	0	0	3.85518	0	0	0	0	0	0	0	0	0	0	0	0	0	0	0	0	0	0	0	0	0	0	0	0	0	0	0	0	0	0	0	0	0	0	0	0	0	0	0	0	0
Allonocardiopsis	0	0	0	0	0	0	0	0	0	0	0	0	0	0	0	0	0	0	0	0	0	0	0	0	0	0	0	0	0	0	0	0	0	0	0	0	0	0	0	0	0	0	0	0	0	0	0	0	0
Alloprevotella	7.98129	0	0	0.240305	0	0	0	0	0	0	0	0	0	0	0	0	0	0	0.0410782	0	0.085722	0	0	0	0	0	0	1.90977	1.01021	0	0	0	0	0	0	0.0649179	3.9131	0	0	0	0	0	0	0	0	0	0.0226959	0	0
Allopseudarcicella	0	0	0	0	0	0	0	0	0	0	0	0	0	0	0	0	0	0	0	0	0	0	0	0	0	0	0	0	0	0	0	0	0	0	0.0453004	0	0	0	0	0	0	0	0	0	0	0	0	0	0
Allorhizocola	0	0	0	0	0	0	0	0	0	0	0	0	0	0	0	0	0	0	0	0	0.630138	0	0	0	0	0	0	0	0	0	0	0	0	0	0	0	0	0	0	0	0	0	0	0	0	0	0	0	0
Alloscardovia	0	0	0	0	0	0	0	0	0	0	0	0	0	0	0	0	0	0	0	0	0.0553458	0	0	0	0	0	0	0	0	0	0	0	0	0	0	0	0	0	0	0	0	0	0	0	0	0	0	0	0
Alphaproteobacteria_norank	0.658097	0	0	0	0	0	0.100854	0	0	0	0	0	0	0	0	0	0	0	0	0	0.265978	0	0	0	0	0	0.0250761	0	0	0	0	0	0	0	0	0	0	0	0	0	0	0	0	0	0	0	0	0	0
Altererythrobacter	0	0	0	0	0	0	0	0	0	0	0	0	0	0	0	0	0	0	0	0	0.0782643	0	0	0	0	0	0	0	0	0	0	0	0	0	0	0	0	0	0	0	0	0	0	0	0	0	0	0	0
Alterileibacterium	0	0	0	0	0	0	0	0	0	0	0	0	0	0	0	0	0	0	0	0	0	0	0	0	0	0	0	0	0	0	0	0	0	0	0	0	0	0	0	0	0	0	0	0	0	0	0	0	0
Alteromonadaceae_norank	0.0444898	0	0	0	0	0	0	0.0132298	0	0	0	0	0	0	0	0	0	0	0	0	0	0	0	0	0	0	0	0	0	0	0	0	0	0	0	0	0	0	0	0	0	0	0	0	0	0	0	0	0
Alteromonas	0	0	0	0	0	0	0	0	0	0	0	0	0	0	0	0	0	0	0	0	0.0613199	0	0	0	0	0	0	0.47673	0.0217103	0	0	0	0	0	0	0	0	0	0	0	0	0	0	0	0	0	1.21649	0	0.111358
Aminicella	0	0	0	0	0	0	0	0	0	0	0	0	0	0	0	0	0	0	0	0	0	0	0	0	0	0	0	0	0	0	0	0	0	0	0	0	0	1.11863	0	0	0	0	0	0	0	0	0	0	0
Aminipila	0.55596	0	0	0	0	0	0	0	0	0	0	0	0	0	0	0	0	0	0	0	0	0	0	0	0	0	0	0	0	0	0	0	0	0	0	0	0	0	0	0.0480243	0	0	0	0	0	0	0.0785724	0	0
Aminobacterium	0	0	0	0	0	0	0	0	0	0	0	0	0	0	0	0	0	0	0	0	0	0	0	0	0	0	0	0	0	0	0	0	0	0	0	0	0	0	0	0	0	0	0	0	0	0	0	0	0
Ammonifex	0	0	0	0	0	0	0	0	0	0	0	0	0	0	0	0	0	0	0	0	0	0	0	0	0	0	0	0	0	0	0	0	0	0	0	0	0	0	0	0	0	0	0	0	0	0	0	0	0
Ammoniphilus	0	0	0	0	0	0	0	0	0	0	0	0	0	0	0	0	0	0	0	0	0	0	0	0	0	0	0	0	0	0	0	0	0	0	0	0	0	0	0	0	0	0	0	0	0	0	0	0	0
Amnibacterium	0	0	0	0	0	0	0	0	0	0	0	0	0	0	0	0	0	0	0	0	0	0	0	0	0	0	0	0	0	0	0	0	0	0	0	0	0	0	0	0	0	0	0	0	0	0	0	0	0
Amphibacillus	0	0	0	0	0	0	0	0.353744	0	0.0828389	0	0	0	0	0	0	0	0	0.0233074	0.0233122	0.297347	0	0	0	0	0	0	0	0.0246862	0	0	0	0	0	0	0	0	0	0	0	0	0	0	0	0	0	0	0	0
Amycolatopsis	0	0	0	0	0	0	0	0	0	0	0	0.0279523	0	0	0	0	0	0	0	0	0	0	0	0	0	0	0	0	0	0	0	0	0	0.0364108	0	0	0	0.0795031	0	0	0	0	0	0	0	0	0	0	0
Anaeroarcus	0	0	0	0.0263167	0	0	0	0	0	0	0	0	0	0	0	0	0	0	0	0	0	0	0	0	0	0	0	0	0	0	0	0	0	0	0	0	0	0	0	0	0	0	0	0	0	0	0	0	0
Anaerobacillus	0	0	0	0	0	0	0	0	0	0	0	0	0	0	0	0	0	0	0	0	0	0	0	0	0	0	0	0	0	0	0	0	0	0	0	0	0	0	0	0	0	0	0	0	0	0	0	0	0
Anaerobacterium	0.91865	0	0	0.032358	0	0	0.178284	0	0	0	0	0	0	0	0	0	0	0	0	0	0.057702	0	0	0	0	0	0	0	0	0	0	0	0	0	0	0	0	0.212402	0	0	0	0	0	0	0	0	0	0	0
Anaerobium	2.2031	0.263418	0	0	0	0	0	0.430918	0	0	0	0	0	0	0	0	0	0	0.223372	0.0440319	0.477447	0	0.289315	0	0.0579021	0.240178	0	0	1.95947	0.093804	0.197205	0	0	0	0.323477	0.208387	0	1.94439	0	0	0	0	0	0	0	0	0	0	0
Anaerobranca	0	0	0	0	0	0	0	0	0	0	0	0	0	0	0	0	0	0	0	0	0	0	0	0	0	0	0	0	0	0	0	0	0	0	0	0	0	0	0	0	0	0	0	0	0	0	0	0	0
Anaerobutyricum	0.0778044	0	0	0.0410158	0	0	0	0	0	0	0	0	0	0	0	0	0	0	0	0	0.0402822	0	0	0	0	0	0	0	0	0	0	0	0	0	0	0	0	0	0	0	0	0	0	0	0	0	0	0	0
Anaerococcus	0.0341618	0	0	0	0	0	0	0.0322047	0	0	0	0	0	0	0	0	0	0	0	0	0	0	0	0	0	0	0	0	0	0	0	0	0	0	0	0	0	0	0	0	0	0	0	0	0	0	0	0	0
Anaerocolumna	5.01586	0.101385	0	1.02213	0	0	0.323306	0.186203	0	0.0236773	0	0	0.0405647	0	0	0.0309816	0	0.0449592	1.66315	0.0947049	2.86027	0	0.461835	0	0	0.303571	0.0342006	0.0897924	6.53317	0.155601	0.240172	0	0	0.468481	1.26154	0.293073	0.0231704	1.50599	0	0	0	0	0	0	0	0.0367826	0	0	0
Anaerofilum	0	0	0	0	0	0	0	0	0	0	0	0	0	0	0	0	0	0	0	0	0	0	0	0	0	0	0.169404	0	0	0	0	0	0	0	0	0.0159791	0	0	0	0	0	0	0	0	0	0	0	0	0
Anaerofustis	0	0	0	0	0	0	0	0	0	0	0	0	0	0	0	0	0	0	0	0	0	0	0	0	0	0	0	0.0132206	0	0	0	0	0	0	0	0	0	0	0	0	0	0	0	0	0	0	0	0	0
Anaerohalosphaera	0	0	0	0	0	0	0	0	0	0	0	0	0	0	0	0	0	0	0	0	0.0485097	0	0	0	0	0	0	0.0397239	0.336303	0	0	0	0	0	0	0	0	0.935632	0	0	0	0	0	0	0	0	0	0	0
Anaerolactibacter	0	0	0	0.979825	0	0	0	0	0	0	0	0	0	0	0	0	0	0	0	0	0.202164	0	0	0	0	0	0	0	0.173554	0	0	0	0	0	0	0	0	0	0	0	0	0	0	0	0	0	0	0	0
Anaerolinea	0	0	0	0.33623	0	0	0	0	0	0	0	0	0	0	0	0	0	0	0.0209516	0.246656	2.40051	0	0.0690004	0	0	0	0	0	0.560471	0	0	0	0	0	0	0	0	0	0	0	0	0	0	0	0	0	0	0	0.0467414
Anaerolineaceae_norank	0.0416623	0.0174731	0	1.20293	0	0	0.0705489	0.141333	0	0.0646392	0	0	0	0	0	0	0	0.130301	0.456994	0.0418894	0.79137	0	0.655104	0	0	0.0678704	0.0569725	0.251433	0.110697	0.207423	0.0320172	0	0	0.422186	0.0286617	0.0590964	0	0	0	0	0	0	0	0	0	0	0.059177	0	0
Anaerolineae_norank	0	0	0	0	0	0	0	0	0	0	0	0	0	0	0	0	0	0	0	0	0.0665907	0	0	0	0	0	0	0	0	0	0	0	0	0	0	0	2.08337	0	0	0	0	0	0	0	0	0	0	0	0.0454896
Anaerolineales_norank	0.356739	0.0722075	0	1.36224	0	0	0	0	0	0	0	0	0	0	0	0	0	0.041162	0	0	0	0	0.090992	0	0	0.0198722	0	0	0.642054	0.0240521	0	0	0	0	0.0430736	0	0	0	0	0	0	0	0	0	0	0	0	0	0
Anaeromassilibacillus	12.6693	0	0	0.0902729	0	0	0	0	0	0	0	0	0	0	0	0.030791	0	0	0.745332	0	0.329602	0	0.124482	0	0	0.931988	0.0159181	0	3.55912	0.0307066	0.204232	0	0	0	0	0.0413389	0	0.017199	0	0	0	0	0	0	0	0	0	0	0
Anaeromicrobium	0	0	0	0	0	0	0	0	0	0	0	0	0	0	0	0	0	0	0	0	0.0118604	0	0	0	0	0	0	0	0	0	0	0	0	0	0	0	0	0	0	0	0	0	0	0	0	0	0	0	0
Anaeromyxobacter	0	0	0	0	0	0	0	0	0	0	0	0	0	0	0	0	0	0	0	0	0	0	0	0	0	0	0	0	0	0	0	0	0	0	0	0	0	0	0	0	0	0	0	0	0	0	0	0	0.0381756
Anaerophaga	0	0	0	0	0	0	0	0	0	0.0102611	0	0	0	0	0	0	0	1.50115	0.0143221	0	0.411121	0	0.126284	0	0	0	0	0.0346081	0.232268	0	0	0	0	0.211295	0	0	0	0	0	0	0	0	0	0	0	0	0	0	0
Anaeroplasma	0.0814909	0	0	0.857368	0	0	0.775824	0.893804	0	0	0	0	0	0	0	0	0	0	0	0	0	0	0	0	0	0	0	0	0.203974	0	0	0	0	0	0	0	6.32711	0	0	0	0	0	0	0	0	0	0	0	0
Anaerorhabdus	0	0	0	0	0	0.0351621	0	0	0	0	0	0	0	0	0	0	0	0	0	0	0	0	0	0	0	0	0	0	0	0	0	0	0	0	0	0	0	0	0	0	0	0	0	0	0	0	0	0	0
Anaerosacchariphilus	0	0	0	0	0	0	0	0.0236523	0	0	0	0	0	0	0	0	0	0	0.033153	0	0.0205378	0	0	0	0	0	0	0	0	0	0	0	0	0	0	0	0	0	0	0	0	0	0	0	0	0	0	0	0
Anaerosalibacter	0	0	0	0	0	0	0	0	0	0	0	0	0	0	0	0	0	0	0	0	0	0	0	0	0	0	0	0	0	0	0	0	0	0	0	0	0	0	0	0	0	0	0	0	0	0	0	0	0
Anaerosphaera	0	0	0	0	0	0	0	0	0	0	0	0	0	0	0	0	0	0	0	0	0	0	0	0	0	0	0	0	0	0	0	0	0	0	0	0	0	0	0	0	0	0	0	0	0	0	0	0	0
Anaerosporobacter	0.029088	0.398722	0	0.315933	0	0	0	0.48172	0.128398	0	0	0	0	0	0	0	0	0	0.127133	0	0.723941	0	0.378758	0	0	0	0	0.538879	0.0391957	0.52559	0.0291552	0	0	0	0.0349336	0.163796	0	0.0187007	0	1.28438	0	0	0	0.25789	0	0	0.717233	0.0785414	0
Anaerostipes	0.508279	0	0	0	0	0	0	0.401266	0	0	0	0	0	0	0	0	0	0	0	0	0	0	0	0	0	0	0	0	0.940923	0	0	0	0	0	0.0271294	0	0.0260184	0	0	0	0	0	0	0	0	0	0.556935	0	0
Anaerotignum	1.98782	0	0	3.72607	0	0	0	0	0	0	0	0	0	0	0	0	0	0	0	0	0	0	0	0	0	0	0	0	0	0	0	0	0	0	0	0	0	0	0	0	0	0	0	0	0	0	0	0	0
Anaerotruncus	2.59314	0.818301	0	0	0	0.0220651	0.226731	0	0	0	0	0	0	0	0	0	0	0.164558	0.308269	0	3.51272	0	5.96865	0	0	0	0	0.0716098	49.2337	0.432947	0	0	0	0	0	0.483209	0	0.583861	0	0	0	0	0	0	0	0	0.0391225	0	0
Anaerovibrio	0.0840761	0	0	1.45943	0	0	0	0	0	0	0	0	0	0	0	0	0	0	0	0	0.0540719	0	0	0	0	0	0	0	0	0	0	0	0	0	0	0	0	0	0	0	0	0	0	0	0	0	0	0	0
Anaerovirgula	0	0	0	0	0	0	0	0	0	0	0	0	0	0	0	0	0	0	0	0	0	0	0	0	0	0	0	0	0	0	0	0	0	0	0	0	0	0	0	0	0	0	0	0	0	0	0.0306165	0	0
Anaerovorax	0.0246904	0	0	0	0	0	0	0	0	0	0	0	0	0	0	0	0	0	0	0	0	0	0	0	0	0	0	0	0	0	0	0	0	0	0	0	0	0	0	0	0	0	0	0	0	0	0	0	0
Ancylistaceae	0	0	0	0	0	0	0	0	0	0	0	0	0	0	0	0	0	0	0	0	0	0	0	0	0	0	0	0	0	0	0	0	0	0	0	0	0	0	0	0	0	0	0	0	0	0	0	0	0
Ancylomarina	0	0	0	0.0146947	0	0	0	0	0	0.0141319	0	0	0	0	0	0	0	0	0	0	0	0	0	0	0	0	0	0	0	0	0	0	0	0	0.0916642	0	0	0	0	0	0	0	0	0	0	0	0	0	0
Ancylostomatidae	0	0	0	0	0	0	0	0	0	0	0	0	0	0	0	0	0	0	0	0	0	0	0	0	0	0	0	0.0348046	0	0	0	0	0	0	0	0	0	0	0	0	0	0	0	0	0	0	0	0	0
Anditalea	0	0	0	0.0195261	0	0	0	0	0	0	0	0	0	0	0	0	0	0	0	0	0	0	0	0	0	0	0	0	0.28454	0	0	0	0	0	0	0	0	0	0	0	0	0	0	0	0	0	0	0	0
Andreesenia	0	0	0	0	0	0	0	0	0	0	0	0	0	0	0	0	0	0	0	0	0	0	0	0	0	0	0	0	0	0	0	0	0	0	0	0	0	0	0	0	0	0	0	0	0	0	0	0	0
Aneurinibacillus	0	0	0	0	0	0	0	0	0	0	0	0	0	0	0	0	0	0	0.0419913	0	0	0	0	0	0	0	0	0	0	0	0	0	0	0	0	0	0	0	0	0	0	0	0	0	0	0	0	0	0
Angelakisella	0	0	0	0	0	0	0	0	0	0	0	0	0	0	0	0	0	0	0	0	0	0	0	0	0	0	0	0	0	0	0	0	0	0	0	0	0	0	0	0	0	0	0	0	0	0	0	0	0
Anisakidae	0	0	0	0	0	0	0	0	0	0	0	0	0	0	0	0	0	0	0	0	0	0	0	0	0	0	0	0	0	0	0	0	0	0	0	0	0	0	0	0	0	0	0	0	0	0	0	0	0
Anoxybacillus	0	0	0	0.0518241	0	0	0	0.0343478	0	0	0	0	0	0	0	0	0	0	0	0	0	0	0	0	0	0	0	0.0223153	0	0	0	0	0	0	0	0	0	0	0	0	0	0	0	0	0	0	0	0	0
Anoxybacter	0	0	0	0	0	0	0	0.124626	0	0	0	0	0	0	0	0	0	0	0	0	0	0	0	0	0	0	0	0	0	0	0	0	0	0	0	0	0	0	0	0	0	0	0	0	0	0	0	0	0
Anseongella	0	0	0	0	0	0	0	0	0	0	0	0	0	0	0	0	0	0	0	0	0.185831	0	0	0	0	0	0	0	0	0	0	0	0	0.0868558	0	0	0	0.140322	0	0	0	0	0	0	0	0	0.0666584	0	0
Aphanocapsa	0	0	0	0	0	0	0	0	0	0	0	0	0	0	0	0	0	0	0	0	0	0	0	0	0	0	0	0	0	0	0	0	0	0	0	0	0	0	0	0	0	0	0	0	0	0	0	0	0
Aphanomyces	0	0	0	0	0	0	0	0	0	0	0	0	0	0	0	0	0	0	0.0801189	0	0	0	0	0	0	0	0	0	0	0	0	0	0	0	0	0	0	0	0	0	0	0	0	0	0	0	0	0	0
Aphididae	0	0	0	0	0	0	0	0	0	0	0	0	0	0	0	0	0	0	0	0	0	0	0	0	0	0	0	0	0	0	0	0	0	0	0	0	0	0	0	0	0	0	0	0	0	0	0	0	0
Apiaceae	0	0	0	0	0	0	0	0	0	0	0	0	0	0	0	0	0	0	0	0	0	0	0	0	0	0	0	0	0	0	0	0	0	0	0	0	0	0	0	0	0	0	0	0	0	0	0	0	0
Apidae	0	0	0	0	0	0	0	0	0	0	0	0	0	0	0	0	0	0	0	0	0	0	0	0	0	0	0	0	0	0	0	0	0	0	0	0	0	0	0	0	0	0	0	0	0	0	0	0	0
Aquabacterium	0	0	0	0	0	0	0	0	0	0	0	0	0	0	0	0	0	0	0	0	0	0	0	0	0	0	0.0428643	0	0	0	0	0	0	0	0.0163307	0	0	0	0	0	0	0	0	0	0	0	0	0	0
Aquibacillus	0	0.154448	0	0	0	0	0	0	0	0	0	0	0	0	0	0.0202622	0	0	0	0.10122	0.0119084	0	0	0	0	0	0	0	0	0	0	0	0	0	0	0	0	0	0	0	0	0	0	0	0	0	0	0	0
Aquificae_norank	0	0	0	0	0	0	0	0	0	0	0	0	0	0	0	0	0	0	0	0	0	0	0	0	0	0	0	0	0	0	0	0	0	0	0	0	0	0	0	0	0	0	0	0	0	0	0	0	0
Aquiflexum	0	0	0	0	0	0	0	0	0	0	0	0	0	0	0	0	0	0	0	0	0.0105798	0	0	0	0	0	0	1.63372	0	0	0	0	0	0	0	0	0	0	0	0	0	0	0	0	0	0	0	0	0
Aquimarina	0	0	0	0	0	0	0	0	0	0	0	0	0	2.44623	0	0	0	0	0	0	0	0	0	0	0	0	0	0	0	0	0	0	0	0	0	0	0	0	0	0	0	0	0	0	0	0	0.0118675	0	0
Aquisalibacillus	0.0146596	0	0	0	0	0	0	0	0	0	0	0	0	0	0	0	0	0	0	0	0	0	0	0	0	0	0	0	0	0	0	0	0	0	0	0	0	0	0	0	0	0	0	0	0	0	0	0	0
Aquisphaera	0	0	0	0.123786	0	0	0	0	0	0	0	0	0	0	0	0	0	0.0230085	0	0.0523798	0	0	0	0	0	0	0	0.226547	0	0	0	0	0	0	0	0	0	0	0	0	0	0	0	0	0	0	0	0	0
Arabia	0.0725399	0	0	0	0	0	0	0	0	0	0	0	0	0	0	0	0	0	0	0	0	0	0	0	0	0	0	0	0	0	0	0	0	0	0	0	0	0	0	0	0	0	0	0	0	0	0	0	0
Arachidicoccus	0	0	0	0	0	0	0	0	0	0	0	0	0	0	0	0	0	0	0	0	0.0527689	0	0	0	0	0	0.045328	0.0198929	0	0	0	0	0	0	0	0.886691	0	0	0	0	0	0	0	0	0	0	0	0	0
Archaea_norank	0	0	0	0	0	0	0	0	0	0	0	0	0	0	0	0	0	0	0.754531	0	0	0	0	0	0	0	0	0	0	0	0	0	0	0	0	0	0	0	0	0	0	0	0	0	0	0	0	0	0
Archaeoglobus	0	0	0	0	0	0	0	0	0	0	0	0	0	0	0	0	0	0	0	0	0	0	0	0	0	0	0	0	0	0	0	0	0	0	0	0	0	0	0	0	0	0	0	0	0	0	0	0	0
Arcicella	0	0	0	0	0	0	0	0	0	0	0	0	0	0	0	0	0	0	0	0	0	0	0	0	0	0	0	0	0	0	0	0	0	0	0.0189056	0	0	0.0474956	0	0	0	0	0	0	0	0	0	0	0
Arcobacter	0	0	0	0	0	0	0	0	0	0	0	0	0	0	0	0	0	0	0	0	0	0	0	0	0	0	0	0	0	0	0	0	0	0	0	0	0	0	0	0	0	0	0	0	0	0	0	0	0
Arcticibacter	0	0.0118838	0	0	0	0	0	0	0	0	0	0.074695	0	0	0	0	0	0	0	0	0.538186	0	0	0	0	0	0	0.0212222	0	0	0	0	0	0	0.0544921	0.0471295	0	0.00954069	0	0	0	0	0	0	0	0	0	0	0
Arcticibacterium	0	0	0	0	0	0	0	0	0	0	0	0	0	0	0	0	0	0	0.0799574	0	0	0	0	0	0	0	0	0	0	0	0	0	0	0	0	0	0	0	0	0	0	0	0	0	0	0	0	0	0
Ardenticatenia_norank	0	0	0	0	0	0	0	0	0	0	0	0	0	0	0	0	0	0	0	0	0	0	0	0	0	0	0	0	0	0	0	0	0	0	0	0	0	0	0	0	0	0	0	0	0	0	0	0	0
Arecaceae	0	0	0	0	0	0	0	0	0	0	0	0	0	0	0	0	0	0	0	0	0	0	0	0	0	0	0	0	0	0	0	0	0	0	0	0	0	0	0	0	0	0	0	0	0	0	0	0	0
Arenibacter	0	0	0	0	0	0	0	0	0	0	0	0	0	0	0	0	0	0	0.0827192	0	0	0	0	0	0	0	0.213025	0	0	0.0659702	0	0	0	0	0	0.0774819	0	0	0	0	0	0	0	0	0	0	0	0	0
Arenicella	0	0	0	0	0	0	0	0	0	0	0	0	0	0	0	0	0	0	0	0	0	0	0	0	0	0	0	0	0	0	0	0	0	0	0	0	0	0	0	0	0	0	0	0	0	0	0	0	0
Armatimonadetes_norank	0	0.0288106	0	1.47041	0	0.0259099	0.0723906	0.0404344	0	0	0.022841	0	0	0	0	0	0	0	1.41213	0	0.610148	0	0.114054	0	0	0.0789917	2.28474	0.676741	1.37447	0.144803	2.0489	0	0	0.0157517	0.164145	3.50014	0.0455409	0.397998	0	0	0	0	0	0	0	0	0	0	0
Arsenicibacter	0	0	0	2.29226	0	0	0	0	0	0	0	0	0	0	0	0	0	0	0	0	0	0	0	0	0	0	0	0	0	0	0	0	0	0	0	0.0146014	0.0097815	0	0	0	0	0	0	0	0	0	0	0	0
Arsenicicoccus	0	0	0	0	0	0	0	0	0	0	0	0	0	0	0	0	0	0	0.0210706	0	0	0	0	0	0	0	0	0	0	0	0	0	0	0	0	0	0	0	0	0	0	0	0	0	0	0	0	0	0
Arsenicitalea	0	0	0	0	0	0	0	0	0	0	0	0	0	0	0	0	0	0	0	0	0	0	0	0	0.0389869	0	0	0	0	0	0	0	0	0	0	0	0	0	0	0	0	0	0	0	0	0	0	0	0
Arthrobacter	0	0	0	0.570534	0	0	0	0	0	0.00622738	0	0	0	0	0	0	0	0	0.455225	0	0.156357	0	0	0	0	0	0	0	0	0	0	0	0	0	0.0600089	0	0	0	0	0	0	0	0	0	0	0	0	0	0
Arundinibacter	0	0	0	0	0	0	0	0	0	0.192763	0	0	0	0	0	0	0	0	0	0	0.0399545	0	0	0	0	0	0	0	0	0	0	0	0	0	0	0	0	0	0	0	0	0	0	0	0	0	0	0	0
Asaccharobacter	0	0	0	0	0	0	0	0	0	0	0	0	0	0	0	0	0	0	0	0	0	0	0	0	0	0	0	0.129542	0	0	0	0	0	0	0	0	0	0	0	0	0	0	0	0	0	0	0	0	0
Asaccharospora	0	0	0	0.0570679	0	0	0	0	0	0	0	0	0	0	0	0	0	0	0	0	0	0	0	0	0	0	0	0	0	0	0	0	0	0	0	0	0	0	0	0	0	0	0	0	0	0	0	0	0
Asaia	0	0	0	0	0	0	0	0	0	0	0	0	0	0	0	0	0	0	0	0	0	0	0	0	0	0	0	0	0	0	0	0	0	0	0	0	0	0	0	0	0	0	0	0	0	0	0	0	0
Ascoideaceae	0	0	0	0	0	0	0	0	0	0	0	0	0	0	0	0	0	0	1.4996	0	0	0	0	0	0	0	0	0	0	0	0	0	0	0	0	0	0	0	0	0	0	0	0	0	0	0	0	0	0
Asinibacterium	0.132453	0	0	0.0117546	0	0	0	0	0	0	0	0	0	0	0	0	0	0	0	0	0	0	0.108431	0	0	0.218376	0	0	0	0	0	0	0	0	0	0	0	0	0	0	0	0	0	0	0	0.0596875	0.22589	0	0.0457497
Asparagaceae	0	0	0	0	0	0	0	0	0	0	0	0	0	0	0	0	0	0	0.0272262	0	0	0	0	0	0	0	0	0	0	0	0	0	0	0	0	0	0	0	0	0	0	0	0	0	0	0	0	0	0
Aspergillaceae	0	0	0	0	0	0	0	0	0	0	0	0	0	0	0	0	0	0	0.245798	0.0317817	0	0	0	0	0	0	0	0	0.0368441	0	0	0	0	0.0355788	0	0.0116631	0	0.0270584	0	0	0	0	0	0	0	0	0	0	0
Asteraceae	0	0	0	0	0	0	0	0	0	0	0	0	0	0	0	0	0	0	0.0442724	0	0	0	0	0	0	0	0	0	0	0	0	0	0	0	0	0	0	0	0	0	0	0	0	0	0	0	0	0	0
Asticcacaulis	0	0	0	0	0	0	0	0	0	0	0	0	0	0	0	0	0	0	0	0	0.0141936	0	0	0	0	0	0	0	0.0261213	0	0	0	0	0	0	0.0151808	0	0.0106596	0	0	0	0	0	0	0	0	0	0	0
Athalassotoga	0	0	0	0	0	0	0	0	0	0	0	0	0	0	0	0	0	0	0	0	0	0	0	0	0	0	0	0	0	0	0	0	0	0	0	0	0	0	0	0	0	0	0	0	0	0	0	0	0
Atheliaceae	0	0	0	0.182405	0	0	0	0	0	0	0	0	0	0	0	0	0	0	0	0	0	0	0	0	0	0	0	0	0	0	0	0	0	0	0	0	0	0	0	0	0	0	0	0	0	0	0	0	0
Atlantibacter	0	0	0	0	0	0	0	0	0	0	0	0	0	0	0	0	0	0	0	0	0	0	0	0	0	0	0	0	0	0	0	0	0	0	0	0	0	0	0	0	0	0	0	0	0	0	0	0	0
Atopobium	0	0	0	0.0161517	0	0	0	0	0	0	0	0	0	0	0	0	0	0	0	0	0	0	0	0	0	0	0	0	0	0	0	0	0	0	0	0	0	0	0	0	0	0	0	0	0	0	0	0	0
Atopostipes	0	0.142618	0	0	0	0	0	0	0	0	0	0	0	0	0	0	0	0	0	0	0	0	0	0	0	0	0	0	0	0	0	0	0	0	0	0	0	0	0	0	0	0	0	0	0	0	0	0	0
Auraticoccus	0	0	0	0	0	0	0	0	0	0	0	0	0	0	0	0	0	0	0	0	0	0	0	0	0	0	0	0	0	0	0	0	0	0	0	0	0	0	0	0	0	0	0	0	0	0	0	0	0
Aureibacillus	0	0	0	0	0	0	0	0	0	0	0	0	0	0	0	0	0	0	0	0.114918	0.197305	0	0	0	0	0	0	0	0.05564	0	0	0	0	0	0	0	0	0	0	0	0	0	0	0	0	0	0	0	0
Aureibaculum	0.00404506	0	0	0	0	0	0	0	0	0	0	0	0	0	0	0	0	0	0	0	0	0	0	0	0	0	0	0	0	0	0	0	0	0	0	0	0	0	0	0	0	0	0	0	0	0	0	0	0
Aureococcus	0	0	0	0.471144	0	0	0	0	0	0	0	0	0	0	0	0	0	0	0	0	0	0	0	0	0	0	0	0	0	0	0	0	0	0	0	0	0	0	0	0	0	0	0	0	0	0	0	0	0
Azoarcus	0	0	0	0	0	0	0	0	0	0	0	0	0	0	0	0	0	0	0	0	0	0	0	0	0	0	0	0	0	0	0	0	0	0	0	0	0	0	0	0	0	0	0	0	0	0	0	0	0
Azospira	0	0	0	0	0	0	0	0	0	0	0	0	0	0	0	0	0	0	0	0	0	0	0	0	0	0	0	0	0	0	0	0	0	0	0	0	0	0	0	0	0	0	0	0	0	0	0	0	0
Azospirillum	0.25507	0	0	0	0	0	0	0	0	0	0	0	0	0	0	0	0	0	0	0	0	0	0	0	0	0	0	0	0	0	0	0	0	0	0	0	0	0	0	0	0	0	0	0	0	0	0	0	0
Azovibrio	0	0	0	0	0	0	0	0	0	0	0	0	0	0	0	0	0	0	0	0	0	0	0	0	0	0	0	0	0	0	0	0	0	0	0	0	0	0	0	0	0	0	0	0	0	0	0	0	0
Bacillaceae_norank	0.0313066	0	0	0	0	0	0	0	0	0	0	0	0	0	0	0	0	0	0	0	0	0	0	0	0	0	0	0.270906	0	0	0	0	0	0	0	0	0	0	0	0	0	0	0	0	0	0	0.0239761	0	0
Bacilliculturomica	0	0	0	0.0176188	0	0	0	0	0	0	0	0	0	0	0	0	0	0	0	0	0	0	0	0	0	0	0	0	0	0	0	0	0	0	0	0	0	0	0	0	0	0	0	0	0	0	0	0	0
Bacillus	10.9762	4.3971	0	4.07326	0	0	8.12978	0.230549	0	0.926406	0.194524	0.333944	0.0474313	0.0755581	0	0.10162	0	0.0295371	3.14148	1.01468	7.19198	0	0.264539	0	0.0376061	0.735311	0.125819	1.42068	3.92445	0.715079	0.562643	0	0	0.197523	1.53241	1.00824	0.615825	4.39583	0	0	0	0	0	0.0361757	0	0.0162276	0.397244	0	0.376499
Bacteria_norank	238.869	8.96159	0.175084	100.661	0	14.3329	22.8693	6.36735	0.138394	54.4153	2.30629	2.11005	13.6735	0.608082	0.0579545	0.701937	0	2.38758	15.4615	10.8253	102.004	0.0800286	66.4856	2.50621	0.440634	2.79303	0.248912	50.1935	94.0326	1.14773	3.53178	0	0	0	21.7911	15.6147	4.32259	80.8502	0.0579545	0.0417864	0.0253622	0	0	0	0	0.0851534	34.6449	0	0.158324
Bacteroidaceae_norank	3.95479	0	0	0	0	0	0	0	0	0	0	0.183118	0	0	0	0	0	0.129799	0.587025	0	23.0691	0	0	0	0	0	0	12.265	3.72445	0.0170788	0	0	0	0	0.362991	2.09017	0	0.117349	0	0	0	0	0	0.219223	0	0	0	0	0
Bacteroidales_norank	137.113	9.82082	0	62.7765	0	35.9238	17.6968	0	0	27.7473	0	22.779	11.1217	10.4361	0	0	0	1.04226	28.7471	6.74519	120.661	0	22.3685	6.15076	0	5.14809	1.4915	24.6039	123.784	0	1.17588	0	0	0.0391942	3.56482	14.2747	22.1	7.89386	0	1.82855	0	0	0	0.125537	0	0.0191891	0.611651	0.765862	0.313965
Bacteroides	225.128	23.5619	0	78.304	0	69.1958	21.2796	0	0	43.5479	0	27.1278	4.442	17.628	0	4.56361	0	38.7051	120.667	28.9397	283.907	0	54.2143	10.7438	1.39388	18.7815	14.9652	36.5227	257.939	2.46619	8.64521	0	0	4.2077	31.9028	57.1426	34.7849	82.6217	0	16.2798	0	0	0	3.97498	0	10.0634	3.48462	0.262577	0.603098
Bacteroidetes_norank	24.0997	0.869505	0	19.5534	0	4.76831	1.06686	0	0	0.591243	0	0	0	0	0	0	0	0	0.851228	0	0.768843	1.05697	0	0	0	0.158031	0.22465	2.75241	22.712	0.0878085	0.117598	0	0	0	0.0342516	0.989313	0.064975	3.81821	0	0.0224153	0	0	0	0	0	0	4.1199	0	0.134539
Bacteroidia_norank	8.70555	1.27212	0	0.248728	0	0.202593	0	0	0	0.0439807	0	0	3.2929	0	0	0	0	0	0.585631	0.0195725	3.58686	0	0.295184	0	0	0.206424	0.157526	5.6925	6.58868	0	0.0136377	0	0	0	0	1.37986	0.0773638	1.45222	0	0.0669742	0.0197658	0	0	1.2799	0	0	0	0	1.06593
Balneola	0	0	0	0.083125	0	0	0	0	0	0	0	0	0	0	0	0	0	0	0	0	0	0	0	0	0	0	0	0	0	0	0	0	0	0	0	0	0	0	0	0	0	0	0	0	0	0	0	0	0
Balneolaceae_norank	0	0.0455852	0	0	0	0	0	0	0	0.0252868	0	0	0	0	0	0	0	0	0	0	0.0646466	0	0	0	0	0	0	0.0265807	0	0	0	0	0	0	0	0	0	0	0	0	0	0	0	0	0	0	0	0	0
Bariatricus	0.0763341	0	0	0	0	0	0	0	0	0	0	0	0	0	0	0	0	0	0	0	0	0	0	0	0	0.0863295	0	0	0.100106	0	0	0	0	0	0	0	0	0	0	0	0	0	0	0	0	0	0	0	0
Barnesiella	0.0866489	0	0	0.418389	0	0	18.8894	0	0	0.366474	0	0.0125636	0	0	0	0	0	0	0.309008	0	0.610148	0	0	0	0	0	0	6.27042	4.26559	0	0	0	0	0.615578	2.07853	0.285702	0	0	0	0	0	0	0	0	0	0.30997	0	0	0
Basfia	0	0	0	0	0	0	0	0	0	0	0	0	0	0	0	0	0	0	0	0	0	0	0	0	0	0	0	0	0.0248006	0	0	0	0	0	0	0	0	0	0	0	0	0	0	0	0	0	0	0	0
Basidiobolaceae	0	0	0	0	0	0	0	0	0	0	0	0	0	0	0	0	0	0	0.219249	0	0	0	0	0	0	0	0	0	0	0	0	0	0	0	0	0	0	0	0	0	0	0	0	0	0	0	0	0	0
Bathycoccaceae	0	0	0	0.0747381	0	0	0	0	0	0	0	0	0	0	0	0	0	0	0	0	0	0	0	0	0	0	0	0	0	0	0	0	0	0	0	0	0	0	0	0	0	0	0	0	0	0	0	0	0
Bathyergidae	0	0	0	0	0	0	0	0	0	0	0	0	0	0	0	0	0	0	0.0580467	0	0	0	0	0	0	0	0	0	0	0	0	0	0	0	0	0	0	0	0	0	0	0	0	0	0	0	0	0	0
Bavariicoccus	0	0	0	0	0	0	0	0	0	0	0	0	0	0	0	0	0	0	0.018961	0	0	0	0	0	0	0	0	0	0	0	0	0	0	0	0	0	0	0	0	0	0	0	0	0	0	0	0	0	0
Bdellovibrionales_norank	0	0	0	0	0	0	0	0	0	0	0	0	0	0	0	0	0	0	0	0	0	0	0	0	0	0	0	0	0	0	0	0	0	0	0	0	0	0	0	0	0	0	0	0	0	0	0	0	0
Beduini	0	0	0	0	0	0	0	1.14614	0	0	0	0	0	0	0	0	0	0	0	0	0	0	0	0	0	0	0	0	0	0	0	0	0	0	0	0	0	0	0	0	0	0	0	0	0	0	0	0	0
Beijerinckiaceae_norank	0	0	0	0	0	0	0	0	0	0	0	0	0	0	0	0	0	0	0	0	0	0	0	0	0	0	0	0	0	0	0	0	0	0	0	0	0	0.0571887	0	0	0	0	0	0	0	0	0	0	0
Belliella	0	0	0	0	0	0	0	0	0	0	0	0	0	0	0	0	0	0	0	0	0.0559118	0	0	0	0	0	0	0	0	0	0	0	0	0	0	0	0	0	0	0	0	0	0	0	0	0	0	0	0
Bernardetia	0.0168853	0	0	0	0	0	0	0	0	0	0	0	0	0	0	0	0	0	0	0	0	0	0	0	0	0	0	0	0	0	0	0	0	0	0	0	0	0	0	0	0	0	0	0	0	0	0	0	0
Besnoitia	0.111779	0	0	0	0	0	0	0	0	0	0	0	0	0	0	0	0	0	0	0	0	0	0	0	0	0	0	0	0	0	0	0	0	0	0	0	0	0	0	0	0	0	0	0	0	0	0	0	0
Betaproteobacteria_norank	0	0	0	0	0	0	0	0	0	0	0	0	0	0	0	0	0	0	0	0	0	0	0	0	0	0	0	0	0	0	0	0	0	0	0	0	0	0.0147867	0	0	0	0	0	0	0	0	0	0	0
Beutenbergia	0	0	0	0	0	0	0	0	0	0	0	0	0	0	0	0	0	0	0	0	0	0	0	0	0	0	0	0	0	0.0887805	0	0	0	0	0	0	0	0	0	0	0	0	0	0	0	0	0	0	0
Bifidobacteriaceae_norank	0	0	0	0	0	0	0	0	0	0	0	0	0	0	0	0	0	0	0	0	0	0	0	0	0	0	0	0	0	0	0	0	0	0	0	0	0	0	0	0	0	0	0	0	0	0	0	0	0
Bifidobacterium	0.207785	1.7497	0	0.151152	0	0	0	0.0191627	0	0	0	0	0	0	0	0.11351	0	0.428076	0.161205	0.349232	0.431998	0	0.0354452	0	0	0.0766932	0	0.207093	0.217887	0	0	0	0	0	0	0.224156	0	0.0433542	0	0	0	0	0	0	0	0	0.0562874	0	0
Bignoniaceae	0	0	0	0	0	0	0	0	0	0	0	0	0	0	0	0	0	0	0	0	0	0	0	0	0	0	0	0	0	0	0	0	0	0	0	0	0	0	0	0	0	0	0	0	0	0	0	0	0
Bilophila	0	0	0	0	0	0	0	0	0	0	0	0	0	0	0	0	0	0	0	0	0	0	0	0	0	0	0	0	0	0	0	0	0	0	0	0	0	0	0	0	0	0	0	0	0	0	0	0	0
Bittarella	0	0	0	0	0	0	0	0	0	0	0	0	0	0	0	0	0	0	0	0	0	0	0	0	0	0	0	0	0	0	0	0	0	0	0	0	0	0	0	0	0	0	0	0	0	0	0.0129425	0	0
Bizionia	0.0413107	0	0	0	0	0	0	0	0	0	0	0	0	0	0	0	0	0	0	0	0	0	0	0	0	0	0	0	0	0	0	0	0	0	0	0	0	0	0	0	0	0	0	0	0	0	0	0	0
Blastocatellia_norank	0	0	0	0	0	0	0	0	0	0	0	0	0	0	0	0	0	0	0	0	0	0	0	0	0	0	0	0	0	0.0758888	0	0	0	0	0	0.0206314	0	0	0	0	0	0	0	0	0	0	0	0	0
Blastococcus	0	0	0	0	0	0	0	0	0	0	0	0	0	0	0	0	0	0	0	0	0.0413315	0	0	0	0	0	0	0	0	0	0	0	0	0	0	0	0	0	0	0	0	0	0	0	0	0	0	0	0
Blastocystis	0	0	0	0.0927443	0	0	0	0	0	0	0	0	0	0	0	0	0	0	0	0.0353586	0	0	0	0	0	0	0	0.0123294	0	0.0203942	0	0	0	0	0	0	0	0	0	0	0.0462897	0	0	0	0	0	0	0	0
Blastopirellula	0	0	0	0	0	0	0	0	0	0	0	0	0	0	0	0	0	0	0	0	0.0789298	0	0	0	0	0	0	0	0	0	0	0	0	0	0	0	0	0	0	0	0	0	0	0	0	0	0	0	0
Blautia	29.5339	0.622079	0	1.5346	0	0.04468	2.382	1.9891	0	2.03188	0	0.20469	0.0328527	2.4307	0	3.56213	0	3.01942	11.6197	1.31195	13.0622	0	5.13819	0	0.475903	2.64113	0	0.169022	30.6432	0.108987	4.2359	0	0	0.0727606	0.985196	0.729792	1.10241	23.4244	0	0	0	0	0	0	0	0	0.0485882	0	0
Bodo	0	0	0	0	0	0	0	0	0	0	0	0	0	0	0	0	0	0	0	0	0	0	0	0	0	0	0	0	0	0	0	0	0	0	0	0	0	0	0	0	0	0	0	0	0	0	0	0	0
Bogoriella	0	0	0	0	0	0	0	0	0	0	0	0	0	0	0	0	0	0	0	0	0	0	0	0	0	0	0	0	0	0	0	0	0	0	0	0	0	0	0	0	0	0	0	0	0	0	0	0	0
Botryobacter	0	0	0	0	0	0	0	0	0	0	0	0.0848105	0	0	0	0	0	0.1514	0.0416639	0	0.184796	0	0.144114	0	0	0	0	0	0.0346364	0	0	0	0	0	0.00641363	0	0	0	0	0	0	0	0	0	0	0	0	0	0
Bovidae	0	0	0	0	0	0	0	0	0	0	0.114526	0	0	0	0	0	0	0	0	0	9.44167	0	0	0	0	0	0	0	0	0	0	0	0	0	0	0	0	0	0	0	0	0	0	0	0	0	0	0	0
Brachionidae	0	0	0	0	0	0	0	0	0	0	0	0	0	0	0	0	0	0	0.112348	0	0	0	0	0	0	0	0	0	0	0	0	0	0	0	0	0	0	0	0	0	0	0	0	0	0	0	0	0	0
Brachybacterium	0	0	0	0	0	0	0	0	0	0	0	0	0	0	0	0	0	0	0	0	0	0	0	0	0	0	0	0	0	0	0	0	0	0	0	0	0	0	0	0	0	0	0	0	0	0	0	0	0
Brachybasidiaceae	0	0	0	0	0	0	0	0	0	0	0	0	0	0	0	0	0	0	0	0	0	0	0	0	0	0	0	0	0	0	0	0	0	0.0219809	0	0	0	0	0	0	0	0	0	0	0	0	0	0	0
Brachyspira	0.316432	0	0	0	0	0	0	0.106236	0	0	0	0	0	0	0	0	0	0	0	0	0.0934683	0	0	0	0	0	0	0	0	0	0	0	0	0	0	0	0	0	0	0	0	0	0	0	0	0	0	0	0
Braconidae	0	0	0	0	0	0	0	0	0	0	0	0	0	0	0	0	0	0	0	0	0	0	0	0	0	0	0	0	0	0	0	0	0	0	0	0	0	0	0	0	0	0	0	0	0	0	0	0	0
Bradymonadales_norank	0	0	0	0	0	0	0	0	0	0	0	0	0	0	0	0	0	0	0	0	0	0	0	0	0	0	0	0	0	0	0	0	0	0	0	0	0	0.0197276	0	0	0	0	0	0	0	0	0	0	0
Bradyrhizobiaceae_norank	0	0	0	0	0	0	0	0	0	0	0	0	0	0	0	0	0	0	0	0	0	0	0	0	0	0	0	0	0	0	0	0	0	0	0	0	0	0	0	0	0	0	0	0	0	0	0	0	0
Bradyrhizobium	0.498486	0	0	0.471247	0	0	0	0.16034	0	0	0	0	0	0	0	0	0	0	0	0	0	0	0	0.150828	0	0	0.00972256	0	0	0.155413	0	0	0	0	0	0	0	0	0	0	0.502797	0	0	0	0	0	0.0717975	0	0
Brassicaceae	0	0	0	0	0	0	0	0	0	0	0	0	0	0	0	0	0	0	0	0	0	0	0	0	0	0	0	0	0	0	0	0	0	0	0	0	0	0	0	0	0	0	0	0	0	0	0	0	0
Bremerella	0	0	0	0	0	0	0	0	0	0	0	0	0	0	0	0	0	0	0	0	0	0	0	0	0	0	0	0	0	0	0	0	0	0	0	0	0	0	0	0	0	0	0	0	0	0	0	0	0
Bremia	0	0	0	0	0	0	0	0	0	0	0	0	0	0	0	0	0	0	0.0124311	0	0	0	0	0	0	0	0	0	0	0	0	0	0	0	0	0	0	0	0	0	0	0	0	0	0	0	0	0	0
Brenneria	0	0	0	0	0	0	0	0	0	0	0	0	0	0	0	0	0	0	0	0	0	0	0	0	0	0	0	0	0	0	0	0	0	0	0	0	0	0.0107416	0	0	0	0	0	0	0	0	0	0	0
Brevibacillus	0	0	0	0	0	0	0	0	0	0	0	0	0	0	0	0	0	0	0	0	0	0	0	0	0	0	0	0	0	0	0	0	0	0	0	0.183021	0	0.0796403	0	0	0	0	0	0	0	0	0	0	0
Brevibacterium	0	0	0	0	0	0	0	0	0	0	0	0	0	0	0	0	0	0	0	0	0	0	0	0	0	0	0	0	0	0	0	0	0	0	0	0	0	0	0	0	0	0	0	0	0	0	0	0	0
Brevifollis	0	0	0	0	0	0	0	0	0	0	0	0	0	0	0	0	0	0	0	0	0	0	0	0	0	0	0	0	0	0	0	0	0	0.05791	0	0	0	0	0	0	0	0	0	0	0	0	0	0	0
Brevundimonas	0	0	0	0	0	0	0	0	0	0	0	0	0	0	0	0	0	0	0	0	0	0	0	0	0	0	0	0	0	0	0	0	0	0	0	0	0	0.112855	0	0	0	0	0	0	0	0	0	0	0
Breznakia	0	0	0	0	0	0	0	0.0164917	0	0	0	0	0	0	0	0	0	0	0	0	0	0	0	0	0	0	0	0	0	0	0	0	0	0	0	0	0	0	0	0	0	0	0	0	0	0	0	0	0
Brochothrix	0	0	0	0	0	0	0	0	0	0	0	0	0	0	0	0	0	0	0	0	0	0	0	0	0	0	0	0	0	0	0	0	0	0	0	0	0	0	0	0	0	0	0	0	0	0	0	0	0
Bromeliaceae	0	0	0	0	0	0	0	0	0	0	0	0	0	0	0	0	0	0	0.0581248	0	0	0	0	0	0	0	0	0	0	0	0	0	0	0	0	0	0	0	0	0	0	0	0	0	0	0	0	0	0
Bryobacterales_norank	0	0	0	0	0	0	0	0	0	0.0125092	0	0	0	0	0	0	0	3.82696	0	0	0.0374358	0	0.0264332	0	0.127281	0.112923	0	0	0	0	0.0228626	0	0	0	0	0	0	0	0	0	0	0	0	0	0	0	0	0	0
Bulleidia	0	0	0	0	0	0	0	0	0	0	0	0	0	0	0	0	0	0	0	0	0	0	0	0	0	0	0	0	0	0	0	0	0	0	0	0	0	0	0	0	0	0	0	0	0	0	0	0	0
Buprestidae	0	0	0	0	0	0	0	0	0	0	0	0	0	0	0	0	0	0	0	0	0	0	0	0	0	0	0	0	0	0	0	0	0	0	0	0	0	0	0	0	0	0	0	0	0	0	0	0	0
Burkholderia	0	0	0	0	0	0	0	0	0	0	0	0	0	0	0	0	0	0	0	0	0.10333	0	0	0	0	0	0	0	0	0.151387	0	0	0	0	0	0	0	0	0	0	0	0	0	0	0	0	0	0	0
Burkholderiaceae_norank	0	0	0	0	0	0	0	0	0	0	0	0	0	0	0	0	0	0	0	0	0	0	0.0378254	0	0	0	0	0	0	0	0	0	0	0	0	0	0	0	0	0	0	0	0	0	0	0	0	0	0
Burkholderiales_norank	0	0	0	0	0	0	0	0	0	0	0	0	0	0	0	0	0	0	0	0	0.0323001	0	0	0	0	0	0	0	0	0	0.108869	0	0	0	0	0	0	0	0	0	0	0	0	0	0	0	0	0	0
Butyricicoccus	2.06289	0	0	0.013499	0	0	0	0.137514	0	0	0.0753654	0	0	0	0	0	0	0	0	0	0	0	0	0	0	0	0	0	1.04029	0.360483	0	0	0	0	0	0.0886856	0	0	0	0	0	0	0	0	0	0	0.305073	0	0
Butyricimonas	3.15632	0	0	0	0	0	0	0	0	0	0	0	0	0	0	0	0	0	0	0	0	0	0	0	0	0	0	0	4.29378	0	0	0	0	0	0.0122127	0	0	0	0	0	0	0	0	0	0	0	0	0	0
Butyrivibrio	96.6245	3.15261	0	28.7683	0	11.5514	13.3436	4.47906	0.386116	29.0064	2.10279	8.24639	2.23247	3.38889	0.234637	9.8769	0	3.02687	30.4257	6.34181	73.0955	0	12.7891	0	0	10.069	0	9.43951	33.6168	8.37935	3.39428	0	0	0	9.76512	8.65748	8.76604	11.9599	0.234637	0.0540112	0	0	0	1.27498	0.0680369	0	0.140166	0	0
Bythopirellula	0	0	0	0	0	0	0	0	0	0	0	0	0	0	0	0	0	0	0	0	0	0	0	0	0	0	0	0	0	0	0	0	0	0	0	0	0	0	0	0	0	0	0	0	0	0	0	0	0
Caballeronia	0	0	0	0	0	0	0	0	0	0	0	0	0	0	0	0	0	0	0	0	0	0	0	0	0	0	0.0460297	0	0	0.429931	0	0	0	0	0	0	0	0	0	0	0	0	0	0	0	0	0	0	0
Caenibacillus	0	0	0	0	0	0	0	0	0	0	0	0	0	0	0	0	0	0	0.0341784	0	0	0	0	0	0	0	0	0	0	0	0	0	0	0	0	0	0	0	0	0	0	0	0	0	0	0	0	0	0
Cafeteria	0	0	0	0	0	0	0	0	0	0	0	0	0	0	0	0	0	0	0	0	0	0	0	0	0	0	0	0	0	0	0	0	0	0	0	0	0	0	0	0	0	0	0	0	0	0	0	0	0
Caldanaerobacter	0.0266142	0	0	0	0	0	0.0238441	0	0	0	0	0	0	0	0	0	0	0	0	0	0	0	0	0	0	0	0	0	0	0	0	0	0	0	0	0	0	0	0	0	0	0	0	0	0	0	0	0	0
Caldanaerobius	0.0173601	0	0	0.54301	0	0	0.03703	0.111516	0	0	0	0	0	0	0	0	0	0.817274	1.33684	0.321478	0	0	0.167233	0	0.703683	1.07561	0	0	4.33262	0	0.331998	0	0	0	0	0	0	0.275058	0	0	0	0	0	0	0	0	0	0	0
Calderihabitans	0	0	0	0	0	0	0	0	0	0	0	0	0	0	0	0	0	0	0	0	0	0	0	0	0	0	0	0	0	0	0	0	0	0	0	0	0	0	0	0	0	0	0	0	0	0	0	0	0
Caldibacillus	0.104033	0	0	0	0	0	0	0	0	0	0	0	0	0	0	0	0	0	0	0	0	0	0	0	0	0	0	0	0	0	0	0	0	0	0	0	0.266765	0	0	0	0	0	0	0	0	0	0	0	0
Caldicellulosiruptor	0.0525077	0.0814694	0	1.56619	0	0	0	0	0	0.214299	0.138117	0	0	0	0	0	0	0	0.0547571	0.0409571	0.134281	0	0.0505478	0	0	0.0201059	0	0.0577746	0.371801	0.144793	0	0	0	0	0.234328	0.97991	0	0.0284728	0	0	0	0	0	0.126355	0	0	0.136155	0	0
Caldicoprobacter	0.380696	0	0	0	0	0.216745	0.0777146	0	0	0.807283	0	0	0	0	0	0	0	0	0.155362	15.3421	0.222075	0	0.0571813	0	0.376781	0	0	0.190194	1.79134	0	6.74253	0.0214837	0	0	0	0	0	0.939778	0	0	0	0	0	0	0	0	0.190885	0	0
Caldilineaceae_norank	0	0	0	0.145343	0	0	0	0	0	0	0	0	0	0	0	0	0	0	0	0	0	0	0	0	0.157874	0	0	0	0.013867	0	0	0	0	0.0294766	0	0	0	0	0	0	0	0	0	0	0	0	0.0230287	0	0
Caldilineae_norank	0	0	0	0.0160654	0	0	0	0	0	0	0	0	0	0	0	0	0	0	0	0	0	0	0	0	0	0	0	0	0	0	0	0	0	0	0	0	0	0	0	0	0	0	0	0	0	0	0	0	0
Caldisalinibacter	0	0	0	0	0	0	0	0.010658	0	0	0	0	0	0	0	0	0	0	0	0	0	0	0	0	0	0	0	0.0161803	0	0	0	0	0	0	0	0	0	0	0	0	0	0	0	0	0	0	0	0	0
Caldiserica_norank	0	0	0	0	0	0	0	0	0	0	0	0	0	0	0	0	0	0	0	0	0	0	0	0	0	0	0	0	0	0	0	0	0	0	0	0	0	0	0	0	0	0	0	0	0	0	0	0	0
Caldisphaera	0	0	0	0	0	0	0	0	0	0	0	0	0	0	0	0	0	0	0	0	0	0	0	0	0	0	0	0	0	0	0	0	0	0	0	0	0	0	0	0	0	0	0	0	0	0	0	0	0
Caldithrix	0	0	0	0	0	0	0	0	0	0	0	0	0	0	0	0	0	0	0	0	0	0	0	0	0	0	0	0	0	0	0	0	0	0	0	0	0	0	0	0	0	0	0	0	0	0	0	0	0
Calditrichaeota_norank	0	0.671971	0	0.329699	0	0	0.122475	0	0	0	0	0	0	0	0	0	0	0	0.202527	0	0.156351	0	0	0	0	0	0	0.0207885	0	0	0.0186031	0	0	0	0	0	0	0.585443	0	0	0	0	0	0	0	0	0	0	0
Calidifontibacter	0	0	0	0	0	0	0	0	0.0457442	0	0	0	0	0	0	0	0	0	0	0	0	0	0	0	0	0	0	0	0	0	0	0	0	0	0	0	0	0	0	0	0	0	0	0	0	0	0	0	0
Callorhinchidae	0	0	0	0	0	0	0	0	0	0	0	0	0	0	0	0	0	0	0.161163	0	0	0	0	0	0	0	0	0	0	0	0	0	0	0	0	0	0	0	0	0	0	0	0	0	0	0	0	0	0
Caloramator	0.0550473	0.802045	0	0	0	0	0	0.237251	0	0	0	0	0	0	0	0	0	0	0.0344413	0	1.02199	0	0	0	0	0	0	0.443383	0	0	0	0	0	0	0	0	0	0	0	0	0	0	0	0	0	0	0	0	0.142482
Caloranaerobacter	0	0	0	0	0	0	0.117694	0	0	0.298892	0	0	0	0	0	0	0	0	0	0	0	0	0	0	0	0	0	0	0.297999	0	0	0	0	0	0	0	0	0	0	0	0	0	0	0	0	0.0710764	0	0	0
Calorimonas	0	0	0	0.0257982	0	0	0	0	0	0	0	0	0	0	0	0	0	0	0	0	0.0272131	0	0	0	0	0	0	0.00953025	0	0	0	0	0	0	0	0	0	0	0	0	0	0	0	0	0	0	0	0	0
Caminicella	0	0	0	0	0	0	0	0	0	0	0	0	0	0	0	0	0	0	0	0	0	0	0	0	0	0	0	0	0	0	0	0	0	0	0	0	0	0	0	0	0	0	0	0	0	0	0	0	0
Campylobacter	0.0509372	0	0	0	0	0	0	0	0	0	0	0	0	0	0	0	0	0	0	0	0	0	0	0	0	0	0	0	0	0	0	0	0	0	0	0	0	0	0	0	0	0	0	0	0	0	0	0	0
Campylobacteraceae_norank	0	0	0	0	0	0	0	0	0	0	0	0	0	0	0	0	0	0	0	0	0	0	0	0	0	0	0	0	0	0	0	0	0	0	0	0	0	0	0	0	0	0	0	0	0	0	0	0	0
candidate division KD3-62_norank	0	0	0	0	0	0	0	0	0	0	0	0	0	0	0	0	0	0	0	0	0	0	0	0	0	0	0.0180826	0	0.199313	0	0	0	0	0	0	0	0	0	0	0	0	0	0	0	0	0	0	0	0
candidate division WOR-3_norank	0	0	0	0	0	0	0	0	0	0	0	0	0	0	0	0	0	0	0	0	0	0	0	0	0	0	0	0	0	0	0	0	0	0	0	0	0	0	0	0	0	0	0	0	0	0	0	0	0
candidate division Zixibacteria_norank	0	0	0	0	0	0	0	0	0	0	0	0	0	0	0	0	0	0	0	0	0	0	0	0	0	0	0	0.032408	0	0	0	0	0	0	0	0	0	0	0	0	0	0	0	0	0	0	0	0	0
Candidatus Abyssubacteria_norank	0	0	0	0	0	0	0	0	0	0	0	0	0	0	0	0	0	0	0	0	0.0185602	0	0	0	0	0	0	0	0	0	0	0	0	0	0	0	0	0	0	0	0	0	0	0	0	0	0	0	0
Candidatus Acidulodesulfobacterium	0	0	0	0	0	0	0	0	0	0	0	0	0	0	0	0	0	0	0	0	0	0	0	0	0	0	0	0	0	0	0	0	0	0	0	0	0	0	0	0	0	0	0	0	0	0	0	0	0
Candidatus Aenigmarchaeota_norank	0	0	0	0	0	0	0	0	0	0	0	0	0	0	0	0	0	0	0	0	0	0	0	0	0	0	0	0	0	0	0	0	0	0	0	0	0	0	0	0	0	0	0	0	0	0	0	0	0
Candidatus Aerophobetes_norank	0	0	0	0.0519606	0	0	0	0	0	0	0	0	0	0	0	0	0	0	0	0	0	0	0	0	0	0	0	0	0	0	0	0	0	0	0	0	0	0.0520943	0	0	0	0	0	0	0	0	0	0	0
Candidatus Aminicenantes_norank	0.0179699	0	0	0	0	0	0	0	0	0	0	0	0	0	0	0	0	0	0.0392009	0	0	0	0	0	0.0451041	0	0	0	0	0.0676679	0	0	0	0	0	0	0	0.168092	0	0	0	0	0	0	0	0	0	0	0
Candidatus Amulumruptor	0.641912	0	0	1.2453	0	0	0	0	0	0	0	0	0	0	0	0	0	0	0.170092	0	0	0	0	0	0	0	0	0	0	0	0	0	0	0	0	0	0	0	0	0.618424	0	0	0	0	0	0	0	0	0
Candidatus Arthromitus	0	0	0	0	0	0	0	0	0	0	0	0	0	0	0	0	0	0	0	0	0	0	0	0	0	0	0	0	0	0	0	0	0	0	0	0	0	0	0	0	0	0	0	0	0	0	0	0	0
Candidatus Atribacteria_norank	0	0	0	0	0	0	0	0	0	0	0	0	0	0	0	0	0	0	0	0	0	0	0	0	0	0	0	0	0	0	0.0192206	0	0	0	0	1.09266	0	0	0	0	0	0	0	0	0	0	0	0	0
Candidatus Bathyarchaeota_norank	0.263899	0	0	0.137302	0	0	0	0	0	0	0	0	0	0	0	0	0	0	0	0	0.0339565	0	0	0	0.946382	0	0	0	0.133026	0	0.155708	0	0	0	0	0	0	0.714568	0	0	0	0	0	0	0	0	0	0	0
Candidatus Berkelbacteria_norank	0	0	0	0.131194	0	0	0	0	0	0	0	0	0	0	0	0	0	0	0	0	0	0	0	0	0	0	0	0	0	0.290881	0	0	0	0	0	0	0	0	0	0	0	0	0	0	0	0	0	0	0
Candidatus Borkfalkia	0.716792	0.262871	0	0.493711	0	0	1.889	0	0	0	0	0	0	0	0	0	0	0.477217	0	0	3.62547	0	0	0	0	0	0	0	0.0575201	0.018323	0.0450619	0	0	0	0	2.40258	0	4.6124	0	0.446864	0	0	0	0	0	0	0	0	0
Candidatus Brocadia	0	0	0	0	0	0	0	0	0	0	0	0	0	0	0	0	0	0	0	0	0	0	0	0	0	0	0	0	0	0	0	0	0	0	0	0	0	0	0	0	0	0	0	0	0	0	0	0	0
Candidatus Brocadiae_norank	0	0	0	0	0	0	0	0	0	0	0	0	0	0	0	0	0	0	0	0	0	0	0	0	0	0	0	0	0	0	0	0	0	0	0	0	0	0	0	0	0	0	0	0	0	0	0	0	0
Candidatus Campbellbacteria_norank	0	0	0	0	0	0	0	0	0	0	0	0	0	0	0	0	0	0	0	0	0	0	0	0	0	0	0	0	0	0	0	0	0	0	0	0	0	0	0	0	0	0	0	0	0	0	0	0	0
Candidatus Carbobacillus	0.0151853	0	0	0	0	0	0	0.0184085	0	0	0	0	0	0	0	0	0	0	0	0	0	0	0	0	0	0	0	0	0	0	0	0	0	0	0	0	0	0	0	0	0	0	0	0	0	0	0	0	0
Candidatus Chrysopegis	0.110395	0	0	0	0	0	0	0	0	0	0	0	0	0	0	0	0	0	0	0	0	0	0	0	0	0	0	0	0	0	0	0	0	0	0	0	0	0	0	0	0	0	0	0	0	0	0	0	0
Candidatus Cloacimonas	0	0	0	0	0	0	0	0	0	0	0	0	0	0	0	0	0	0	0	0	0	0	0	0	0	0	0	0.0623454	0	0	0	0	0	0	0	0	0	0	0	0	0	0	0	0	0	0	0	0	0
Candidatus Cloacimonetes_norank	0	0	0	0	0	0	0	0	0	0	0	0	0	0	0	0	0	0	0	0	0	0	0	0	0	0	0	0	0	0	0	0	0	0	0	0	0	0	0	0	0	0	0	0	0	0	1.09855	0	0
Candidatus Cryosericum	0	0	0	0	0	0	0	0	0	0	0	0	0	0	0	0	0	0	0	0	0	0	0	0	0	0	0	0.0131581	0	0	0	0	0	0	0	0	0	0	0	0	0	0	0	0	0	0	0	0	0
Candidatus Dadabacteria_norank	0	0	0	0	0	0	0	0	0	0	0	0	0	0	0	0	0	0	0	0	0	0	0	0	0	0	0	0	0	0	0	0	0	0	0	0	0	0	0	0	0	0	0	0	0	0	0	0	0
Candidatus Deianiraea	0	0	0	0	0	0	0	0	0	0	0	0	0	0	0	0	0	0	0	0	0	0	0	0	0	0	0	0	0	0	0	0	0	0	0	0	0	0	0	0	0	0	0	0	0	0	0	0	0
Candidatus Desantisbacteria_norank	0	0	0	0.0430623	0	0	0	0	0	0	0	0	0	0	0	0	0	0	0	0	0	0	0.0372263	0	0.178628	0.172751	0	0	1.95426	0	0.30462	0	0	0	0	0	0	0.0107789	0	0	0	0	0	0	0	0	0	0	0
Candidatus Dichloromethanomonas	0	0	0	0	0	0	0	0	0	0	0	0	0	0	0	0	0	0	0	0	0	0	0	0	0	0	0	0	0	0	0	0	0	0	0	0	0	0	0	0	0	0	0	0	0	0	0	0	0.0133984
Candidatus Falkowbacteria_norank	0	0	0	0.645537	0	0	0	0	0	0	0	0	0	0	0	0	0	0	0	0	0	0	0	0	0	0	0	0	0	0	0	0	0	0	0	0	0	0	0	0	0	0	0	0	0	0	0	0	0
Candidatus Finniella	0	0	0	0	0	0	0	0	0	0	0	0	0	0	0	0	0	0	0	0	0	0	0	0	0	0	0	0	0	0	0	0	0	0	0	0	0	0	0	0	0	0	0	0	0	0	0	0	0
Candidatus Firestonebacteria_norank	0	0	0	0	0	0	0	0	0	0	0	0	0	0	0	0	0	0	0.0288137	0	0	0	0	0	0	0	0	0	0	0	0	0	0	0	0	0	0	0.0924207	0	0	0	0	0	0	0	0	0	0	0
Candidatus Galacturonibacter	0.552588	0	0	0	0	0	0	0.213043	0	0	0	0	0	0	0	0	0	0	0	0.0106896	0.313497	0	0	0	0	0	0	0	0.424324	0.0433114	0	0	0.00737794	0	2.30217	0	0.183142	0.00524825	0	0	0	0	0	0	0	0	0	0	0
Candidatus Gastranaerophilales_norank	0.893953	0	0	0	0	0	0	0	0	0	0	0	0	0	0.0373612	0	0	0	0	0	0	0	0	0	0	0	0	0.0201126	0	0	0	0	0	0	0	0	0	0	0.0373612	0	0	0	0	0	0	0	0	0	0
Candidatus Glassbacteria_norank	0	0	0	0	0	0	0	0	0	0	0	0	0	0	0	0	0	0	0	0	0	0	0	0	0	0	0	0	0	0	0	0	0	0	0	0	0	0	0	0	0	0	0	0	0	0	0.124041	0	0
Candidatus Goldbacteria_norank	0	0	0	0.58863	0	0	0	0	0	0	0	0	0	0	0	0	0	0	0	0	0	0	0	0	0	0	0	0	0	0	0	0	0	0	0	0	0	0	0	0	0	0	0	0	0	0	0	0	0
Candidatus Handelsmanbacteria_norank	0	0	0	0	0	0	0	0	0	0	0	0	0	0	0	0	0	0	0	0	0	0	0	0	0	0	0	0	0	0	0	0	0	0	0	0	0	0	0	0	0	0	0	0	0	0	0	0	0
Candidatus Hydrogenedentes_norank	0	0	0	0	0	0.131819	0.411505	0	0	0	0	0	0	0	0	0	0	0	0	0	0	0	0	0	0	0	0	0	0	0	0	0	0	0	0	0	0	0	0	0	0	0	0	0	0	0	0	0	0
Candidatus Hydrothermae_norank	0	0	0	0	0	0	0	0	0	0	0	0	0	0	0	0	0	0	0	0	0	0	0	0	0	0	0	0	0	0	0	0	0	0	0	0	0	0	0	0	0	0	0	0	0	0	0	0	0
Candidatus Izimaplasma	0	0	0	0.0471713	0	0	0	0	0	0	0	0	0	0	0	0	0	0	0	0	0	0	0	0	0	0	0	0	0	0	0	0	0	0	0	0	0	0	0	0	0	0	0	0	0	0	0	0	0
Candidatus Korarchaeota_norank	0	0	0	0.0125957	0	0	0	0	0	0	0	0	0	0	0	0	0	0	0	0	0	0	0	0	0	0	0	0	0	0	0	0	0	0	0	0	0	0	0	0	0	0	0	0	0	0	0	0	0
Candidatus Koribacter	0	0	0	0	0	0	0	0	0	0	0	0	0	0	0	0	0	0	0	0	0	0	0	0	0	0	0	0	0.0240434	0	0	0	0	0	0	0	0	0	0	0	0	0	0	0	0	0	0	0	0
Candidatus Kuenenia	0	0	0	0	0	0	0	0	0	0	0	0	0	0	0	0	0	0	0	0	0	0	0	0	0	0	0	0	0	0	0	0	0	0	0	0	0	0	0	0	0	0	0	0	0	0	0.0172984	0	0
Candidatus Latescibacteria_norank	0	0	0	0.193932	0	0	0	0	0	0	0	0	0	0	0	0	0	0.32463	0	0	0.147093	0	0	0	0.320718	0.160033	0	0	0.0463064	0	0	0	0	0.201278	0	0	0	0.0651758	0	0	0	0	0	0	0	0	0	0	0
Candidatus Levybacteria_norank	0	0	0	0	0	0	0	0	0	0	0	0	0	0	0	0	0	0	0	0	0	0	0	0	0	0	0	0	0	0	0	0	0	0	0	0	0	0	0	0	0	0	0	0	0	0	0	0	0
Candidatus Lokiarchaeota_norank	0	0	0	0	0	0	0	0	0	0	0	0	0	0	0	0	0	0	0.138059	0	0	0	0	0	0	0	0	0	0.0158412	0	0	0	0	0	0	0	0	0	0	0	0	0	0	0	0	0	0	0	0
Candidatus Marinimicrobia_norank	0.340627	0.0520491	0	0.141024	0	0	0	0	0	0	0	0	0	0	0	0	0	0	0	0	0.559837	0	0	0	0	0	0	0.0167037	0	0	0	0	0	0	0	0	0	0.131934	0	0	0	0	0	0	0	0	1.07387	0	0
Candidatus Melainabacteria_norank	1.84155	0.030513	0	0	0	0	0	0	0	0	0	0	0	0	0	0	0	0	0	0.248102	0.352037	0	0	0	0	0	0	0	0	0.0365944	0	0	0	0	0	0	0	0	0	0	0	0	0	0	0	0	0	0	0
Candidatus Methanomethylophilus	0	0	0	0	0	0	0	0	0	0	0	0	0	0	0	0	0	0	0	0	0	0	0	0	0	0	0	0	0	0	0	0	0	0	0	0.0188547	0	0	0	0	0	0	0	0	0	0	0	0	0
Candidatus Microgenomates_norank	0	0	0	0	0	0	0	0	0	0	0	0	0	0	0	0	0	0	0	0	0	0	0	0	0	0	0	0	0	0	0	0	0	0	0	0.931025	0	0	0	0	0	0	0	0	0	0	0	0	0
Candidatus Moduliflexus	0	0	0	0	0	0	0	0	0	0	0	0	0	0	0	0	0	0	0	0	0.167023	0	0	0	0	0	0	0	0.0731126	0	0.054403	0	0	0	0	0	0	0.463073	0	0	0	0	0	0	0	0	0	0	0
Candidatus Moranbacteria_norank	0	0	0	0	0	0.203034	0	0	0	0	0	0	0	0	0	0	0	0	0	0	0	0	0	0	0	0	0	0	0	0	0	0	0	0	0	0.207983	0	0.0297921	0	0	0	0	0	0	0	0	0	0	0
Candidatus Muproteobacteria_norank	0.0183889	0	0	0	0	0	0	0	0	0	0	0	0	0	0	0	0	0	0	0	0	0	0	0	0	0	0	0	0	0	0	0	0	0	0	0	0	0	0	0	0	0	0	0	0	0	0	0	0
Candidatus Nealsonbacteria_norank	0	0	0	0	0	0	0	0	0	0	0	0	0	0	0	0	0	0.207348	0	0	0	0	0	0	0	0	0	0	0	0	0	0	0	0	0	0	0	0	0	0	0	0	0	0	0	0	0	0	0
Candidatus Nephrothrix	0	0	0	0	0	0	0	0	0	0	0	0	0	0	0	0	0	0	0	0	0	0	0	0	0	0	0	0	0.0441999	0	0	0	0	0	0	0	0	0.0890737	0	0	0	0	0	0	0	0	0	0	0
Candidatus Nomurabacteria_norank	0	0.0282809	0	2.04014	0	0	0	0	0	0	0	0	0	0	0	0	0	0.0419094	0	0	0.228713	0	0	0	0	0.0724279	0	0	0	0.0197161	0	0	0	0	0	17.8978	0	0.51889	0	0	0	0	0	0	0	0	0	0	0
Candidatus Omnitrophica_norank	0	0	0	0.698569	0	0	0.131073	0	0	0	0	0	0	0	0	0	0	0.00729394	0	0	0	0	0	0	0	0.478027	0.608272	0.27009	0.0333481	0.0592996	0	0	0	0	0	1.69057	0	0.399191	0	0	0	0	0	0	0	0	0.00942519	0	0
Candidatus Omnitrophus	0	0	0	0	0	0	0	0	0	0	0	0	0	0	0	0	0	0	0	0	0	0	0	0	0	0	0	0	0	0	0	0	0	0	0	0	0	0	0	0	0	0	0	0	0	0	0	0	0
Candidatus Parcubacteria_norank	0	0	0	0.0303358	0	0	0	0	0	0	0	0	0	0	0	0	0	0	0	0	0	0	0	0	0	0	0	0	0	0	0	0	0	0	0	0	0	0	0	0	0	0	0	0	0	0	0	0	0
Candidatus Phycosocius	0	0	0	0.0179907	0	0	0	0	0	0	0	0	0	0	0	0	0	0	0	0	0	0	0	0	0	0	0	0	0	0	0	0	0	0	0	0	0	0	0	0	0	0	0	0	0	0	0	0	0
Candidatus Planktophila	0	0	0	0	0	0	0	0	0	0	0	0	0	0	0	0	0	0	0	0	0.383572	0	0	0	0	0	0	0.0404627	0	0	0	0	0	0	0	0	0	0	0	0	0	0	0	0	0	0	0	0	0
Candidatus Poribacteria_norank	0	0	0	0	0	0.0576469	0	0	0	0	0	0	0	0	0	0	0	0	0	0	0.710945	0	0	0	0	0.0643973	0.143037	0	0.0179564	0.0194056	0	0	0	0	0	0	0	0.342016	0	0	0	0	0	0	0	0	0.0663054	0	0
Candidatus Raymondbacteria_norank	0	0	0	0	0	0.0354161	0	0	0	0	0	0	0	0	0	0	0	0	0	0	0	0	0	0	0.0417993	0	0	0	0.0348416	0	0	0	0	0	0	0.104951	0	0	0	0	0	0	0	0	0	0	0	0	0
Candidatus Roizmanbacteria_norank	0	0	0	0	0	0	0	0	0	0	0	0	0	0	0	0	0	0	0	0	0	0	0	0	0	0	0	0	0	0	0	0	0	0	0	0	0	0	0	0	0	0	0	0	0	0	0	0	0
Candidatus Rokubacteria_norank	0	0	0	0	0	0	0.0260196	0	0	0	0	0	0	0	0	0	0	0	0	0	0	0	0	0	0	0	0	0	0	0	0	0	0	0	0	0	0	0	0	0	0	0	0	0	0	0	0	0	0
Candidatus Saccharibacteria_norank	0	0	0	0.955491	0	0	0	0	0	0	0	0	0	0	0	0	0	0	0	0	0.0218741	0	0	0	0	0	0	0.230896	0	0	0	0	0	0	0	0	0	0	0	0	0	0	0	0	0	0	0	0	0
Candidatus Saccharicenans	0	0	0	0	0	0	0	0	0	0	0	0	0	0	0	0	0	0	0	0	0	0	0	0	0	0.0349376	0	0	0	0	0	0	0	0	0	0	0	0	0	0	0	0	0	0	0	0	0	0	0
Candidatus Saccharimonas	0	0	0	0	0	0	0	0	0	0	0	0	0	0	0	0	0	0	0	0	0	0	0	0	0	0	0	0.446501	0	0	0	0	0	0	0	0	0	0	0	0	0	0	0	0	0	0	0	0	0
Candidatus Schekmanbacteria_norank	0	0	0	0	0	0	0	0	0	0	0	0	0	0	0	0	0	0	0	0	0	0	0	0	0	0	0	0	0	0	0	0	0	0	0	0	0	0	0	0	0	0	0	0	0	0	0	0	0
Candidatus Soleaferrea	1.48864	0	0	0	0	0	0.214727	0	0	0	0	0	0	0	0	0	0	0	0.237942	0	0.212014	0	0	0	0	0	0	0	0.167257	0	0	0	0	0	0	0	0	0	0	0	0	0	0	0	0	0	0	0	0.227318
Candidatus Solibacter	0	0	0	0	0	0	0	0	0	0	0	0	0	0	0	0	0	0	0	0	0	0	0.426825	0	0	0	0	0	0	0	0	0	0	0	0	0	0	0	0	0	0	0	0	0	0	0	0	0	0
Candidatus Stoquefichus	0.0176015	0.401479	0	0.0219982	0	0	0	1.7719	0	0	0	0	0	0	0	0	0	0	0	0	0	0	0	0	0	0	0	0.107403	0	0	0	0	0	0	0	0	0	0	0	0	0	0	0	0	0	0	0	0	0
Candidatus Sulfopaludibacter	0	0	0	0	0	0	0	0	0	0	0	0	0	0	0	0	0	0	0	0	0	0	0	0	0	0	0	0	0.101963	0	0	0	0	0	0	0	0	0	0	0	0	0	0	0	0	0	0	0	0
Candidatus Sulfotelmatomonas	0	0	0	0	0	0	0	0	0	0	0	0	0	0	0	0	0	0	0	0	0.0181066	0	1.9367	0	0	0	0	0	0.0281131	0	0	0	0	0	0	0	0	0	0	0	0	0	0	0	0	0	0	0	0
Candidatus Sumerlaeota_norank	0	0	0	0.342547	0	0	0	0	0	0	0	0	0	0	0	0	0	0	0.0190001	0.0301247	0.178411	0	0	0	0	0	0	0	0	0.221119	0	0	0	0	0	0.0177434	0	0	0	0	0	0	0	0	0	0	0	0	0
Candidatus Symbiothrix	0	0	0	0	0	0	0	0	0	0	0	0	0	0	0	0	0	0.0739072	0	0	0.0752174	0	1.34157	0	0	0	0	0.334767	2.59889	0	0	0	0	0	0	0	0	0	0	0	0	0	0	0	0	0	0	0	0
Candidatus Thermofonsia_norank	0	0	0	0	0	0	0	0.0218293	0	0	0	0	0	0	0	0	0	0	0	0	0	0	0	0	0	0.0159934	0.148586	0	0	0	0	0	0	0	0	0	0	0	0	0	0	0	0	0	0	0	0	0	0
Candidatus Thiodiazotropha	0	0	0	0	0	0	0	0	0	0	0	0	0	0	0	0	0	0	0	0	0	0	0	0	0	0	0	0	0	0.016948	0	0	0	0	0	0	0	0	0	0	0	0	0	0	0	0	0	0	0
Candidatus Thiosymbion	0.0224051	0	0	0	0	0	0	0	0	0	0	0	0	0	0	0	0	0	0	0	0	0	0	0	0	0	0	0	0	0	0	0	0	0	0	0	0	0	0	0	0	0	0	0	0	0	0	0	0
Candidatus Thorarchaeota_norank	0	0	0	0	0	0	0	0	0	0	0	0	0	0	0	0	0	0	0.0186474	0	0	0	0	0	0	0	0	0	0	0	0	0	0	0	0	0	0	0	0	0	0	0	0	0	0	0	0	0	0
Candidatus Uhrbacteria_norank	0	0	0	0	0	0	0	0	0	0	0	0	0	0	0	0	0	0	0	0	0	0	0	0	0	0	0	0	0	0	0	0	0	0	0	0.628193	0	0	0	0	0	0	0	0	0	0	0	0	0
Candidatus Vecturithrix	0	0	0	0	0	0	0	0	0	0	0	0	0	0	0	0	0	0.100095	0	0	0	0	0	0	0	0	0	0	0	0	0	0	0	0	0	0	0	0	0	0	0	0	0	0	0	0	0	0	0
Candidatus Viridilinea	0	0	0	0	0	0	0	0	0	0	0	0	0	0	0	0	0	0	0	0	0	0	0	0	0	0	0	0	0	0.0197048	0	0	0	0	0	0	0	0	0	0	0	0	0	0	0	0	0	0	0
Candidatus Wallbacteria_norank	0	0	0	0	0	0	0	1.21823	0	0	0	0	0	0	0	0	0	0	0	0	0	0	0	0	0	0	0	0	0	0	0	0	0	0	0	0	0	0	0	0	0	0	0	0	0	0	0.772128	0	0
Candidatus Weimeria	0	0	0	0	0	0	0	0	0	0	0	0	0	0	0	0	0	0	0	0	0	0	0	0	0	0	0	0	0	0	0	0	0	0	0	0	0	0	0	0	0	0	0	0	0	0	0	0	0
Candidatus Woesearchaeota_norank	0	0	0	0	0	0	0	0	0	0	0	0	0	0	0	0	0	0	0	0	0	0	0	0	0	0	0	0	0	0	0	0	0	0	0	0	0	0	0	0	0	0	0	0	0	0	0	0	0
Candidatus Woykebacteria_norank	0	0	0	0	0	0	0.0247169	0	0	0	0	0	0	0	0	0	0	0	0	0	0	0	0	0	0	0	0	0	0	0	0	0	0	0	0	0	0	0	0	0	0	0	0	0	0	0	0	0	0
Candidatus Zambryskibacteria_norank	0	0	0	0	0	0	0	0	0	0	0	0	0	0	0	0	0	0	0	0	0	0	0	0	0	0	0	0	0	0	0	0	0	0	0	0	0	0	0	0	0	0	0	0	0	0	0	0	0
Cannabaceae	0	0	0	0	0	0	0	0	0	0	0	0	0	0	0	0	0	0	0	0	0	0	0	0	0	0	0	0	0	0	0	0	0	0	0	0	0	0	0	0	0	0	0	0	0	0	0	0	0
Capitellidae	0	0	0	0	0	0	0	0	0	0	0	0	0	0	0	0	0	0	0	0	0	0	0	0	0	0	0	0	0	0	0	0	0	0	0	0	0	0	0	0	0	0	0	0	0	0	0	0	0
Capnocytophaga	0.250622	0	0	0.061885	0	0	0	0	0	0	0	0	0	0	0	0	0	0	1.58858	0	0	0	0	0	0	0	0	0.132363	0.177892	0	0	0	0	0	0	0.0209159	0	0	0	0	0	0	0	0	0	0	0	0	0
Caprobacter	0	0	0	0	0	0	0	0	0	0	0	0	0	0	0	0	0	0	0	0	0	0	0	0	0	0	0	0	0	0	0	0	0	0	0	0	0	0	0	0	0	0	0	0	0	0	0	0	0
Caproiciproducens	0	0	0	0	0	0	0	0.163291	0	0	0	0	0	0	0	0	0	0	0	0	0.0409386	0	0	0	0	0	0	0	0.0462541	0	0	0	0	0	0	0	0	0	0	0	0	0	0	0	0	0	0	0	0
Capsaspora	0	0	0	0	0	0	0	0	0	0	0	0	0	0	0	0	0	0	3.36305	0	0	0	0	0	0	0	0	0	0	0	0	0	0	0	0	0	0	0	0	0	0	0	0	0	0	0	0	0	0
Capsulimonas	0	0	0	0	0	0	0	0	0	0	0	0	0	0	0	0	0	0.605695	0	0	0.0929935	0	0.0613116	0	0.0745403	0	0	0	0.0800098	0	0	0	0	0	0	0	0	0.0683217	0	0	0	0	0	0	0	0	0	0	0
Carboxydocella	0	0	0	0	0	0	0.366367	0	0	0	0	0	0	0	0	0	0	0	0	0	0	0	0	0	0	0	0	0	0	0	0	0	0	0	0	0	0	0	0	0	0	0	0	0	0	0	0	0	0.234686
Carboxylicivirga	0.0398797	0	0	0	0	0	0	0	0	0	0	0	0	0	0	0	0	0	0	0	0	0	0	0	0	0	0	0	0	0	0	0	0	0	0	0	0	0.0199498	0	0	0	0	0	0	0	0	0	0	0
Cardiobacterium	0	0	0	0	0	0	0	0	0	0	0	0	0	0	0	0	0	0	0	0	0	0	0	0	0	0	0	0.0247054	0	0	0	0	0	0	0	0.00961225	0	0	0	0	0	0	0	0	0	0	0	0	0
Carnobacterium	0.0354763	0	0	0	0	0	0	0.0694551	0	0	0	0	0	0	0	0	0	0	0.0157192	0	0	0	0	0	0	0	0	0.0541278	0.330333	0	0	0	0	0	0	0	0	0	0	0	0	0	0	0	0	0	0	0	0
Caryophanon	0	0	0	0	0	0	0	0	0	0	0	0	0	0	0	0	0	0	0	0	0	0	0	0	0	0	0	0	0	0	0.0626539	0	0	0	0	0	0	0	0	0	0	0	0	0	0	0	0	0	0
Casimicrobium	0	0	0	0	0	0	0	0	0	0	0	0	0	0	0	0	0	0	0	0	0	0	0	0	0	0	0	0	0	0	0	0	0	0	0	0	0	0	0	0	0	0	0	0	0	0	0	0	0
Castoridae	0	0	0	0	0	0	0	0	0	0	0	0	0	0	0	0	0	0	0.130597	0	0	0	0	0	0	0	0	0	0	0	0	0	0	0	0	0	0	0	0	0	0	0	0	0	0	0	0	0	0
Catabacter	0	0	0	0	0	0.252474	0	0	0	0	0	0	0	0	0	0	0	0	0	0	0	0	0	0	0	0	0	0	0	0	0	0	0	0	0	0	0	0	0	0	0	0	0	0	0	0	0	0	0
Catalinimonas	0.0162242	0	0	0.187671	0	0	0	0	0	0	0	0	0	0	0	0	0	0	0	2.14269	0	0	0	0	0	0	0	0	0	0	0	0	0	0	0	0	0	0.00975894	0	0	0	0	0	0	0	0	0	0	0
Catenibacterium	0.0357766	0	0	0	0	0	0	0.569892	0	0	0	0	0	0	0	0	0	0	0	0	0	0	0	0	0	0	0	0	0	0	0	0	0	0	0	0	0	0	0	0	0	0	0	0	0	0	0	0	0
Catenovulum	0	0	0	0	0	0	0	0	0	0	0	0	0	0	0	0	0	0	0	0	0.0109943	0	0	0	0	0	0	0	0	0	0	0	0	0	0	0	0	0.142815	0	0	0	0	0	0	0	0	0	0	0
Catenulispora	0	0	0	0	0	0	0	0	0	0	0	0	0	0	0	0	0	0	0	0.0294421	0	0	0	0	0	0	0	0	0	0	0	0	0	0	0	0	0	0	0	0	0	0	0	0	0	0	0	0	0
Catenuloplanes	0	0	0	0	0	0	0	0	0	0	0	0	0	0	0	0	0	0	0	0	0.00878181	0	0	0	0	0	0	0	0	0	0	0	0	0.883398	0	0	0	0	0	0	0	0	0	0	0	0	0	0	0
Catonella	0.0741763	0	0	2.28206	0	0	0.924979	0	0	0	0	0	0	0	0	0	0	0.225715	0	0	0	0	0	0	0	0.132152	0	0	0	0	0	0	0	0	0	0	0	0	0	0	0	0	0	0	0	0	0	0	0
Caulobacter	0	0	0	0	0	0	0	0	0	0	0	0	0	0	0	0	0	0	0.143047	0	0.127453	0	0	0	0	0	0	0.035995	0.0865214	0	0	0	0	0	0	0	0	0	0	0	0	0	0	0	0	0	0	0	0
Cavenderia	0	0	0	0	0	0	0	0	0	0	0	0	0	0	0	0	0	0	0.349884	0	0	0	0	0	0	0	0	0	0	0	0	0	0	0	0	0	0	0	0	0	0	0	0	0	0	0	0	0	0
Caviibacter	0	0	0	0	0	0	0	0	0	0	0	0	0	0	0	0	0	0	0	0	0	0	0	0	0	0	0	0	0	0	0	0	0	0	0	0	0	0	0	0	0	0	0	0	0	0	0	0	0
Celeribacter	0	0	0	0	0	0	0	0	0	0	0	0	0	0	0	0	0	0	0	0	0	0	0	0	0	0	0	0	0	0	0	0	0	0	0	0	0	0	0	0	0	0	0	0	0	0	0	0	0
Cellulomonas	0	0	0	0	0	0	0	0	0	0	0	0	0	0	0	0	0	0	0.120179	0	0.245211	0	0.00993487	0	0	0	0	0	0	0.0287329	0	0	0	0	0	0	0	0	0	0	0	0	0	0	0	0	0	0	0
Cellulophaga	0	0	0	0	0	0	0	0	0	0	0	0	0	0	0	0	0	0	0	0	0	0	0	0	0	0	0	0.00787237	0.0510931	0.0331521	0	0	0	0	0.0295637	0.0592286	0	0.0425374	0	0	0	0	0	0	0	0	0	0	0
Cellulosilyticum	0.893427	0	0	0.101067	0	0.0201685	0.373113	0.355176	0	0.745836	0	0	0.0141492	0	0	0.0843395	0	0	1.39206	0.0673483	3.82182	0	0	0	0	0.0547693	0	0.0953604	0.658892	0	0	0	0	0	0.006802	0	0.476457	0.294764	0	0	0	0	0	0	0	0	0.527256	0	0
Cellulosimicrobium	0	0	0	0	0	0	0	0	0	0	0	0	0	0	0	0	0	0	0.0387276	0	0	0	0	0	0	0	0	0	0	0.0261956	0	0	0	0	0	0	0	0	0	0	0	0	0	0	0	0	0	0	0
Cellvibrio	0	0	0	0.0151356	0	0	0	0	0	0	0	0	0	0	0	0	0	0	0	0	0.0227336	0	0	0	0	0	0	0.00816975	0	0	0	0	0	0	0.0378246	0	0	0	0	0	0	0	0	0	0	0	0	0	0
Centipeda	0	0	0	0	0	0	0	0	0	0	0	0	0	0	0	0	0	0	0	0	0	0	0	0	0	0	0	0	0	0	0	0	0	0	0	0	0	0	0	0	0	0	0	0	0	0	0	0	0
Cerambycidae	0	0	0	0	0	0	0	0	0	0	0	0	0	0	0	0	0	0	0	0	0	0	0	0	0	0	0	0	0	0	0	0	0	0	0	0	0	0	0	0	0	0	0	0	0	0	0	0	0
Ceratobasidiaceae	0.546737	0	0	0	0	0	0	0	0	0	0	0	0	0	0	0	0	0	0	0	0	0	0	0	0	0	0	0	0	0	0	0	0	0	0	0	0	0	0	0	0	0	0	0	0	0	0	0	0
Cercopithecidae	0	0	0	0	0	0	0	0	0	0	0	0	0	0	0	0	0	0	0.0748914	0	0	0	0	0	0	0	0	0	0	0	0	0	0	0	0	0	0	0	0	0	0	0	0	0	0	0	0	0	0
Cetobacterium	0	0	0	0	0	0	0	0	0	0	0	0	0	0	0	0	0	0	0	0.191278	0	0	0	0	0	0	0	0	0	0	0	0	0	0	0	0	0	0	0	0	0	0	0	0	0	0	0	0	0
Chelativorans	0	0	0	0	0	0	0.0456043	0	0	0	0	0	0	0	0	0	0	0	0	0	0	0	0	0	0	0	0	0	0	0	0	0	0	0	0	0	0	0	0	0	0	0	0	0	0	0	0	0	0
Chelonobacter	0	0	0	0	0	0	0	0.0342376	0	0	0	0	0	0	0	0	0	0	0	0	0	0	0	0	0	0	0	0	0	0	0	0	0	0	0	0	0	0	0	0	0	0	0	0	0	0	0	0	0
Chengkuizengella	0	0	0	0	0	0	0	0	0	0	0	0	0	0	0	0	0	0	0	0	0	0	0	0	0	0	0	0	0	0	0	0	0	0	0	0	0	0	0	0	0	0	0	0	0	0	0	0	0
Chishuiella	0	0	0	0	0	0	0	0	0	0	0	0	0	0	0	0	0	0	0	0	0	0	0	0	0	0	0	0	0	0	0	0	0	0	0	0	0	0	0	0	0	0	0	0	0	0	0	0	0
Chitinimonas	0.0375974	0	0	0	0	0	0	0	0	0	0	0	0	0	0	0	0	0	0	0	0	0	0	0	0	0	0	0	0	0	0	0	0	0	0	0	0	0	0	0	0	0	0	0	0	0	0	0	0
Chitiniphilus	0	0	0	0	0	0	0	0	0	0	0	0	0	0	0	0	0	0	0	0	0	0	0	0	0	0	0	0.0418286	0	0	0	0	0	0	0	0	0	0	0	0	0	0	0	0	0	0	0	0	0
Chitinispirillum	0	0	0	0.0697479	0	0	0.053076	0	0	0	0	0	0	0	0	0	0	0	0	0	0	0	0	0	0	0	0	1.18404	0	0	0	0	0	0	0	0	0	0	0	0	0	0	0	0	0	0	0	0	0
Chitinivibrio	0	0	0	0	0	0	1.05776	0	0	0	0	0	0	0	0	0	0	0	0	0	0	0	0	0	0	0	0	0	0	0	0	0	0	0	0	0	0	0	0	0	0	0	0	0	0	0	0	0	0
Chitinophaga	0.0287391	0	0	0.0494824	0	0.0564901	3.08757	0	0	0.116626	0	0	0	0	0	0	0	0	0.242575	4.27777	0.965492	0.258557	0.265305	0	0.176578	0	0	0.450129	0.236387	0.0391973	0	0	0	0.0177053	0.252468	1.76265	0	0.511229	0	0	0	0	0	0	0	0	1.05567	0	0.0114241
Chitinophagaceae_norank	0.280633	0.163447	0	0.165733	0	0	0	0	0	0.230788	0	0	0	0	0	0	0	0.0550249	0	0	0.197219	0	0	0	0	0.0487099	0.0551789	2.3026	0.0211212	0	0	0	0	0	0.08567	0	1.80453	0.626775	0	0	0	0	0	0	0	0	0.0182766	0	0
Chitinophagales_norank	0	0	0	0	0	0	0	0	0	0	0	0	0	0	0	0	0	0	0	0	0	0	0	0	0	0	0	0	0	0	0	0	0	0	0	0	0	0	0	0	0	0	0	0	0	0	0	0	0
Chitinophagia_norank	0	0	0	0	0	0	0	0	0	0	0	0	0	0	0	0	0	0	0	0	0.638528	0	0	0	0	0	0	0.0260508	0	0	0.151114	0	0	0	0	0	0.0133249	0.0202958	0	0	0	0	0	0	0	0	0	0	0
Chlamydia	0	0	0	0	0	0	0	0	0	0	0	0	0	0	0	0	0	0	0	0	0	0	0	0	0	0	0.0245007	0	0.171867	0	0	0	0	0	0	0	0	0	0	0	0	0	0	0	0	0	0	0	0
Chlamydiae_norank	0	0	0	0.0715531	0	0	0	0	0	0	0	0	0	0	0	0	0	0	0	0	0.244376	0	0	0	0	0	0	0	0	0	0.1045	0	0	0	0	0	0	0	0	0	0	0	0	0	0	0	0	0	0
Chlamydomonadaceae	0	0	0	0	0	0	0	0	0	0	0	0	0	0	0	0	0	0	0	0	0	0	0	0	0	0	0	0.0195808	0	0	0	0	0	0	0	0	0	0	0	0	0	0	0	0	0	0	0	0	0
Chlorobaculum	0.204859	0	0	0	0	0	0	0	0	0	0	0	0	0	0	0	0	0	0	0	0	0	0	0	0	0	0	0	0	0	0	0	0	0	0	0	0	0	0	0	0	0	0	0	0	0	0	0	0
Chlorobi_norank	0	0	0	0	0	0	0	0	0	0	0	0	0	0	0	0	0	0	0	0	0	0	0	0	0	0	0.0315481	0	0	0	0	0	0	0	0	0	0	0	0	0	0	0	0	0	0	0	1.10309	0	0
Chlorobium	0.0084765	0	0	0	0	0	0	0	0	0	0	0	0	0	0	0	0	0	0	0	0.880549	0	0	0	0	0	0	0	0	0	0	0	0	0	0	0	0	0	0	0	0	0	0	0	0	0	0.772285	0	0
Chloroflexales_norank	0	0	0	0	0	0	0	0	0	0	0	0	0	0	0	0	0	0	0	0	0	0	0	0	0	0	0	0	0	0.0135656	0	0	0	0	0	0	0	0	0	0	0	0	0	0	0	0	0	0	0
Chloroflexi_norank	0.696061	0.0212404	0	0.648068	0	0	0.11179	0.0557911	0	0	0	0	0	0	0	0	0	0.0177571	1.18043	0.106614	3.44522	0	0	0	0.0930828	0.689862	0	0.698288	0.00906556	0.406833	0.0175441	0	0	0	0.190437	0.0853554	0	1.09318	0	0	0	0	0	0	0	0	0	0	0
Chloropicaceae	0	0	0	0	0	0	0	0	0	0	0	0	0	0	0	0	0	0	0.107734	0	0	0	0	0	0	0	0	0	0	0	0	0	0	0	0	0	0	0	0	0	0	0	0	0	0	0	0	0	0
Christensenella	0.126023	0	0	0	0	0	0	0	0	0	0	0	0	0	0	0	0	0	0	0	0	0	0	0	0	0	0	0	0	0	0	0	0	0	0	0	0	0.213144	0	0	0	0	0	0	0	0	0	0	0
Chroococcidiopsis	0	0	0	0	0	0	0	0	0	0	0	0	0	0	0	0	0	0	0	0	0	0	0	0	0	0	0	0.021665	0	0	0	0	0	0	0	0	0	0	0	0	0	0	0	0	0	0	0	0	0
Chryseobacterium	0.0179749	0.825127	0	0.0793358	0	0	0	0	0	0	0	0.0934277	8.77472	0	0	0	0	0	0.00997006	0	0.035948	0	0.0190037	0	0	0	0	0.125244	0.0197793	0	0.182566	0	0	0	0.100779	0	0	0	0	0	0	0	0	0	0	0	1.97741	0	0
Chryseolinea	0	0	0	0	0	0	0	0	0	0	0	0	0	0	0	0	0	0	0	0	0.0583936	0	0	0	0	0	0	0	0	0	0	0	0	0	0.437314	0	0	0	0	0.149279	0	0	0	0	0	0	0	0	0
Chryseotalea	0	0	0	0	0	0	0	0	0	0	0	0	0	0	0	0	0	0	0	0	0	0	0	0	0	0	0	0	0	0	0	0	0	0	0	0	0	0	0	0	0	0	0	0	0	0	0	0	0
Chthoniobacter	0	0	0	0	0	0	0	0	0	0	0	0	0	0	0	0	0	0	0	0	0	0	0	0	0	0	0	0.0575542	0	0	0	0	0	0	0	0	0	0	0	0	0	0	0	0	0	0	0	0	0
Chthonomonas	0	0	0	0.0422612	0	0	0	0	0	0	0	0	0	0	0	0	0	0	0	0	0	0	0	0	0	0	0.0218322	0	0	0	0.0219102	0	0	0	0	0	0	0.139433	0	0	0	0	0	0	0	0	0.00834106	0	0
Ciliophora_norank	0	0	0	54.2655	0	0	0	0	0	5.63893	2.13034	0	0	0	0	0	0	0	0	0	0	0	0	0	0	0	0	0	0	0	0	0	0	0	0	0	0	0	0	0	0	0	0	0	0	0	0	0	0
Cimicidae	0	0	0	0	0	0	0	0	0	0	0	0	0	0	0	0	0	0	0.256905	0	0	0	0	0	0	0	0	0	0	0	0	0	0	0	0	0	0	0	0	0	0	0	0	0	0	0	0	0	0
Citricoccus	0	0	0	0	0	0	0	0	0	0	0	0	0	0	0	0	0	0	0	0	0.0332852	0	0	0	0	0	0	0	0	0	0	0	0	0	0	0	0	0	0	0	0	0	0	0	0	0	0	0	0
Citrobacter	0	0	0	0	0	0	0	0	0	0	0	0	0	0	0	0	0	0.0353994	0.0552985	0	0.0904119	0	0	0	0	0	0	0	0	0	0	0	0	0	0	0	0	0.0247939	0	0	0	0	0	0	0	0	0	0	0
Citromicrobium	0.0198639	0	0	0	0	0	0	0	0	0	0	0	0	0	0	0	0	0	0	0	0	0	0	0	0	0	0	0	0	0	0	0	0	0	0	0	0	0	0	0	0	0	0	0	0	0	0	0	0
Clostridia_norank	6.13895	0	0	9.61225	0	0.540407	19.7732	0.993496	0	4.19214	0	0	0.0430799	0.157542	0	0.261602	0	0.941809	10.162	0.29738	2.55493	0	11.1673	0	0.0992258	0.820079	0	0.0838687	17.5763	6.29981	0.259941	0	0	0	1.01493	1.49944	1.51629	3.75629	0	0	0	0	0	0	0	0.15413	0.11943	0	6.94219
Clostridiaceae_norank	13.7786	0	0	0.899566	0	0	0.45179	2.58392	0	0	0.0420206	0	0.239291	0.0400378	0	1.97843	0	0.358282	3.0638	0.729256	5.41612	0	0.270761	0	0.575706	0.0768926	0.0925454	1.35641	2.15449	0.151866	0.706404	0	0	0.146213	0.252409	1.27544	0	1.65696	0	0	0.0291873	0	0	0	0	0.0491646	0.229644	0	0
Clostridiales Family XII. Incertae Sedis_norank	0.0797766	0	0	0	0	0	0	0	0	0	0	0	0	0	0	0	0	0	0	0	0	0	0	0	0	0	0	0.115805	0	0	0	0	0	0	0	0	0	0	0	0	0	0	0	0	0	0	0	0	0
Clostridiales Family XIII. Incertae Sedis_norank	0	0	0	0	0	0	0	0.103092	0	0	0	0	0	0	0	0	0	0	0	0	0	0	0	0	0	0	0	0	0	0	0	0	0	0	0	0	0	0	0	0	0	0	0	0	0	0	0	0	0
Clostridiales Family XVII. Incertae Sedis_norank	0	0	0	0	0	0	0	0	0	0	0	0	0	0	0	0	0	0	0	0	0	0	0	0	0	0	0	0	0	0	0	0	0	0	0	0	0	0	0	0.0253209	0	0	0	0	0	0	0	0	0
Clostridiales_norank	141.116	14.93	0	45.7134	0	3.33484	58.9077	30.8953	0.277788	24.4686	1.22342	5.76262	9.47345	10.8813	0	19.4505	0.129828	39.9981	57.4058	2.19426	120.58	0	45.2718	0	22.8272	61.6412	25.7922	28.1063	233.922	99.58	35.5964	0.104703	0	6.3584	13.1405	106.635	24.0562	150.884	0	0.0432964	0	0	0	0.442958	0	0.0811693	1.48056	0	16.8548
Clostridiisalibacter	0	0	0	0	0	0	0	0	0	0	0	0	0	0	0	0	0	0	0	0	0	0	0	0	0	0	0	0	0	0	0	0	0	0	0	0	0	0	0	0	0	0	0	0	0	0	0	0	0
Clostridioides	0.315286	0	0	0.435515	0	0	0	0.00523119	0	0	0	0	0	0	0	0	0	0	0	0	0.0247611	0	0	0	0	0	0	0.0323858	0	0	0	0	0	0	0	0	0	0.0945118	0	0	0	0	0	0	0	0	0	0	0
Clostridium	80.0965	20.6952	0	60.6544	0	1.95514	47.9441	9.86622	0.431684	11.7518	0.0230495	1.94137	0.104114	2.32436	0.0231124	4.10869	0	2.58361	35.4447	4.27061	37.5077	0.0841899	28.8912	0	0.0896916	5.36056	1.64714	14.8186	88.3822	6.67329	2.99531	0	0.0835716	0.0900346	4.28655	27.6488	1.67124	44.2228	0.0231124	0.0802954	0	0.203743	0	1.89351	0	0.994274	4.75784	0	16.1552
Cnuibacter	0	0	0	0	0	0	0	0	0	0	0	0	0	0	0	0	0	0	0	0	0	0	0	0	0	0	0	0	0	0	0	0	0	0	0	0	0	0	0	0	0	0	0	0	0	0	0	0	0
Cohaesibacter	0	0	0	0	0	0	0	0	0	0	0	0	0	0	0	0	0	0	0	0	0	0	0	0	0	0.0380719	0	0	0	0	0	0	0	0	0	0	0	0	0	0	0	0	0	0	0	0	0	0	0
Cohnella	19.3972	1.81132	0	4.22769	0	0.0932426	0	0.0350572	0	0.159929	0	0	0	0	0	0	0	0.177608	0.11882	0.468465	1.31813	0	0.300795	0	0.939298	0.0669099	4.42995	1.26369	2.24306	6.10517	0.151814	0	0	0.0504299	7.0574	1.11922	0	5.44574	0	0.118456	0	0	0	2.75093	0	0	0.247879	0	0.0785123
Colidextribacter	0	0	0	0	0	0	0	0	0	0	0	0	0	0	0	0	0	0	0	0	0	0	0	0	0	0	0	0	0.16005	0	0	0	0	0	0	0	0	0	0	0	0	0	0	0	0	0	0	0	0
Collinsella	0.060762	0	0	0.0329533	0	0	0	0.896047	0	0	0	0	0	0	0	0	0	0	0	0	0.0329031	0	0	0	0	0	0	0	0	0	0	0	0	0	0	0	0	0.339795	0	0	0	0	0	0	0	0	0.00705881	0	0
Colubridae	0	0	0	0	0	0	0	0	0	0	0	0	0	0	0	0	0	0	0.0296582	0	0	0	0	0	0	0	0	0	0	0	0	0	0	0	0	0	0	0	0	0	0	0	0	0	0	0	0	0	0
Colwellia	0	0	0	0	0	0	0	0	0	0	0	0	0	0	0	0	0	0	0	0	0	0	0	0	0	0	0	0	0	0	0	0	0	0	0	0	0	0	0	0	0	0	0	0	0	0	0	0	0
Comamonadaceae_norank	0	0	0	0	0	0	0	0	0	0	0	0	0	0	0	0	0	0	0	0	0	0	0	0	0	0	0	0.202366	0	0	0	0	0	0	0	0	0	0	0	0	0	0	0	0	0	0	0	0	0
Comamonas	0	0	0	0	0	0	0	0	0	0	0	0	0	0	0	0	0	0	0	0	0	0	0	0	0	0	0	0	0	0	0.0286466	0	0	0	0	0	0	0	0	0	0	0	0	0	0	0	0	0	0
Conexibacter	0	0	0	0	0	0	0	0	0	0	0	0	0	0	0	0	0	0	0	0	0	0	0	0	0	0	0	0	0	0	0	0	0	0	0	0	0	0	0	0	0	0	0	0	0	0	0	0	0
Confluentibacter	0	0	0	0.139406	0	0.140462	0	0	0	0	0	0	0	0	0	0	0	0	0.0559307	0	0.191241	0	0	0	0	0	0	0	0	0.0428153	0	0	0	0	0	0	0	0	0	0	0	0	0	0	0	0	0	0	0
Coniochaetaceae	0.0543173	0	0	0	0	0	0	0	0	0	0	0	0	0	0	0	0	0	0	0	0	0	0	0	0	0	0	0	0	0	0	0	0	0	0	0	0	0	0	0	0	0	0	0	0	0	0	0	0
Convolvulaceae	0	0	0	0	0	0	0	0	0	0	0	0	0	0	0	0	0	0	0	0	0	0	0	0	0	0	0	0	0	0	0	0	0	0	0	0	0	0	0	0	0	0	0	0	0	0	0	0	0
Coprobacillus	11.7954	0.00952194	0	1.86039	0	2.90956	0.638925	2.19658	0.104476	0	0	0	0	0	0	0	0	0.100598	0.642274	0	1.03588	0	0.0989774	0	0	0	0	0.695901	0.481811	0	0.0141788	0	0	0	0	0.27603	0	0.779937	0	0	0	0	0	0.0346451	0	0.118207	0.0339187	0	0
Coprobacter	0.408014	0.304507	0	0	0	0	0	0	0	0	0	0	0	0	0	0	0	0	0	0	0.234333	0	0	0	0	0	0	0.536278	0.456133	0	0	0	0	0	0.656877	1.91225	0	0.0290975	0	0	0	0	0	0	0	0	0	0	0
Coprococcus	18.4981	0	0	1.17549	0	0.139627	0.154094	0.0167766	0	0	0	0	0	0	0	0	0	0.0702124	0.0466454	0	0.557595	0	1.22265	0	0	0	0	0.145878	2.31936	0	0.189877	0	0	0	0	0	1.26945	0.130439	0	0	0	0	0	0	0	0	0	0	0
Coprothermobacter	0.0572864	0	0	0	0	0	0	0	0	0	0	0	0	0	0	0	0	0	0	0	0	0	0	0	0	0	0	0	0	0	0	0	0	0	0	0	0	0	0	0	0	0	0	0	0	0	0	0	0
Coraliomargarita	0	0.0453505	0	0	0	0	0	0	0	0.0668932	0	0	0	0	0	0	0	0	0	0.533366	0.130936	0	0	0	0	0	0	0.13771	0.217259	0.0177847	0	0	0	0	0.0373308	0.0420028	0	0.377273	0	0	0	0	0	0	0	0	0	0	0
Corallincola	0	0	0	0	0	0	0	0	0	0	0	0	0	0	0	0	0	0	0	0	0	0	0	0	0	0	0	0	0	0	0	0	0	0	0	0	0	0	0	0	0	0	0	0	0	0	0	0	0
Corallococcus	0.0857122	0	0	0	0	0	0	0	0	0	0	0	0	0	0	0	0	0	0	0	0	0	0	0	0	0	0	0	0.140089	0	0	0	0	0	0	0	0	0	0	0	0	0	0	0	0	0	0	0	0
Coriobacteriaceae_norank	0.0416261	0	0	0.147899	0	0	0.0388958	0.0586401	0	0	0	0	0	0	0	0	0	0	0	0	0	0	0	0	0	0	0	0	0	0	0	0	0	0	0	0.0386681	0	0.0313032	0	0	0	0	0	0	0	0	0	0	0
Coriobacteriales_norank	1.25059	0	0	0	0	0	0	0.0589544	0	0	0	0	0	0	0	0	0	0	0	0	0	0	0	0	0	0	0	0	0.194253	0	0	0	0	0	0	0	0	0.147834	0	0	0	0	0	0	0	0	0	0	0
Coriobacteriia_norank	0.0113371	0	0	0.0471417	0	0	0	0	0	0	0	0	0	0	0	0	0	0	0	0	0	0	0	0	0	0	0	0	0	0	0	0	0	0	0	0	0	0	0	0	0	0	0	0	0	0	0	0	0
Coriobacterium	0	0	0	0	0	0	0	0	0	0	0	0	0	0	0	0	0	0	0	0	0	0	0	0	0	0	0	0	0	0	0	0	0	0	0	0.169769	0	0	0	0	0	0	0	0	0	0	0	0	0
Corynebacterium	0	0	0	0	0	0	0	0	0	0	0	0	0	0	0	0	0	0	0	0	0	0	0	0	0	0	0	0	0	0	0	0	0	0	0	0	0	0	0	0	0	0	0	0	0	0	0	0	0
Coxiella	0	0	0	0	0	0	0	0	0	0	0	0	0	0	0	0	0	0	0	0	0	0	0	0	0	0.0156924	0	0	0	0	0	0	0	0	0	0	0	0	0	0	0	0	0	0	0	0	0	0	0
Crassaminicella	0	0	0	0	0	0	0	0	0	0	0	0	0	0	0	0	0	0	0	0	0	0	0	0	0	0	0	0	0	0	0	0	0	0	0	0	0	0	0	0	0	0	0	0	0	0	0	0	0
Crateriforma	0	0	0	0	0	0	0	0	0	0	0	0	0	0	0	0	0	0	0	0	0	0	0	0	0	0	0	0	0.0267282	0	0	0	0	0	0	0	0	0	0	0	0	0	0	0	0	0	0	0	0
Crenotalea	0	0	0	0	0	0	0	0	0	0	0	0	0	0	0	0	0	0	0	0	0	0	0	0	0	0	0	0	0	0	0	0	0	0	0	0.0146158	0	0	0	0	0	0	0	0	0	0	0	0	0
Criibacterium	0.0308658	0	0	0	0	0	0	0	0	0	0	0	0	0	0	0	0	0	0	0	0	0	0	0	0	0	0	0	0	0	0	0	0	0	0	0	0	0	0	0	0	0	0	0	0	0	0	0	0
Croceicoccus	0	0	0	0	0	0	0	0	0	0	0	0	0	0	0	0	0	0	0	0	0	0	0	0	0	0	0	0	0	0.0404508	0	0	0	0	0	0	0	0	0	0	0	0	0	0	0	0	0	0	0
Croceivirga	0	0	0	0	0	0	0	0	0	0	0	0	0	0	0	0	0	0	0	0	0	0	0	0	0	0	0	0	0	0	0	0	0	0	0	0	0	0	0	0	0	0	0	0	0	0	0	0	0
Crocinitomicaceae_norank	0	0	0	0	0	0	0	0	0	0	0	0	0	0	0	0	0	0	0	0	0	0	0	0	0	0	0	0.140689	0	0	0	0	0	0	0	0	0	0	0	0	0	0	0	0	0	0	0.345728	0	0
Crocosphaera	0	0	0	0	0	0	0	0	0	0	0	0	0	0	0	0	0	0	0	0	0	0	0	0	0	0	0	0	0	0	0	0	0	0	0	0	0	0	0	0	0	0	0	0	0	0	0	0	0
Cronobacter	0	0	0	0	0	0	0	0	0	0	0	0	0	0	0	0	0	0	0	0	0	0	0	0	0	0	0	0	0	0	0	0	0	0	0	0	0	0	0	0	0	0	0	0	0	0	0	0	0
Cryobacterium	0	0	0	0	0	0	0	0	0	0	0	0	0	0	0	0	0	0	0.266717	0	0.0925677	0	0	0	0	0	0	0	0	0.0863782	0	0	0	0	0	0	0	0	0	0	0	0	0	0	0	0	0	0	0
Cryomorpha	0	0	0	0	0	0	0	0	0	0	0	0	0	0	0	0	0	0	0	0	0	0	0	0	0	0	0	0.105058	0	0	0	0	0	0	0	0	0	0	0	0	0	0	0	0	0	0	0	0	0
Cryomorphaceae_norank	1.76338	0	0	0	0	0	0	0	0	0	0	0	0	0	0	0	0	0	0	0	0	0	0	0	0	0	0	0.298363	0	0	0	0	0	0	0	0	0	0	0	0	0	0	0	0	0	0	0	0	0
Cryptobacterium	0	0	0	0	0	0	0	0	0	0	0	0	0	0	0	0	0	0	0	0	0	0	0	0	0	0	0	0	0	0	0	0	0	0	0	0	0	0	0	0	0	0	0	0	0	0	0	0	0
Cryptosporidium	0	0	0	0	0	0	0	0	0	0	0	0	0	0	0	0	0	0	0	0	0	0	0	0	0	0	0	0	0	0	0	0	0	0	0	0	0	0	0	0	0	0	0	0	0	0	0	0	0
Cucumibacter	0	0	0	0	0	0.0949463	0	0	0	0	0	0	0	0	0	0	0	0	0	0	0	0	0	0	0	0	0	0	0	0	0	0	0	0	0	0	0	0	0	0	0	0	0	0	0	0	0	0	0
Cucurbitaceae	0	0	0	0	0	0	0	0	0	0	0	0	0	0	0	0	0	0	0.159018	0	0	0	0	0	0	0	0	0	0	0	0	0	0	0	0	0	0	0	0	0	0	0	0	0	0	0	0	0	0
Culicidae	0	0	0	0	0	0	0	0	0	0	0	0	0	0	0	0	0	0	0.768305	0	0	0	0	0	0	0	0	0	0	0	0	0	0	0	0	0	0	0	0	0	0	0	0	0	0	0	0	0	0
Culturomica	0	0	0	0	0	0	0	0	0	0	0	0	0	0	0	0	0	0	0	0	0	0	0	0	0	0	0	0	0.1226	0	0	0	0	0	0	0	0	0	0	0	0	0	0	0	0	0	0	0	0
Cuneatibacter	1.3012	0	0	0	0	0	0	0	0	0	0	0	0	0	0	0.28584	0	0	0	0	0.152852	0	1.96138	0	0	0.0468886	0	0	0.261186	0.033432	0.0258104	0	0	0	0	0.264552	0	0.478938	0	0	0	0	0	0	0	0	0	0	0
Cupriavidus	0	0	0	0	0	0	0	0	0	0	0	0	0	0	0	0	0	0	0	0	0	0	0	0	0	0	0	0	0	0	0	0	0	0	0	0	0	0	0	0	0	0	0	0	0	0	0	0	0
Curtobacterium	0	0	0	0	0	0	0	0	0	0	0	0	0	0	0	0	0	0	0.0145652	0	0	0	0	0	0	0	0	0	0	0	0	0	0	0	0	0.405252	0	0	0	0	0	0	0	0	0	0	0	0	0
Cutibacterium	0	0	0	0	0	0	0	0	0	0	0	0	0	0	0	0	0	0	0	0	0	0	0	0	0	0	0	0	0.220958	0	0	0	0	0	0	0	0	0	0	0	0	0	0	0	0	0	0	0	0
Cyanobacteria_norank	0.81601	0	0	0	0	0	0	0	0	0	0	0	0	0	0	0	0	0	0	0.985305	0	0	0	0	0	0	0	0.123509	0	0	0	0	0	0	0	0	0	0	0	0	0	0	0	0	0	0	0.0513588	0	0
Cyanosarcina	0	0	0	0	0	0	0	0	0	0	0	0	0	0	0	0	0	0	0	0	0	0	0	0	0	0	0	0	0	0	0	0	0	0	0	0	0	0	0	0	0	0	0	0	0	0	0	0	0
Cyanothece	0	0	0	0	0	0	0	0	0	0	0	0	0	0	0	0	0	0	0	0	0	0	0	0	0	0	0	0	0	0	0	0	0	0	0	0	0	0	0	0	0	0	0	0	0	0	0	0	0
Cyclobacteriaceae_norank	0	0	0	0	0	0	0	0	0	0	0	0	0	0	0	0	0	0	0	0	0	0	0	0	0	0	0	1.08873	0	0	0	0	0	0	0	0	0	0	0	0	0	0	0	0	0	0	0	0	0
Cyclobacterium	0	0	0	0	0	0	0	0	0	0	0	0	0	0	0	0	0	0	0	0	0.0407261	0	0.296116	0	0	0	0.0415295	0.355633	0	0.0189746	0.0610402	0	0	0	0	0	0	0.0265097	0	0	0	0	0	0	0	0	0	0	0
Cycloclasticus	0	0	0	0	0	0	0	0	0	0	0	0	0	0	0	0	0	0	0	0	0	0	0	0	0	0	0	0	0	0	0	0	0	0	0	0	0	0	0	0	0	0	0	0	0	0	0	0	0
Cyprinidae	0	0	0	0	0	0	0	0	0	0	0	0	0	0	0	0	0	0	0.116988	0	0	0	0	0	0	0	0	0	0	0	0	0	0	0	0	0	0	0	0	0	0	0	0	0	0	0	0	0	0
Cyprinodontidae	0	0	0	0	0	0	0	0	0	0	0	0	0	0	0	0	0	0	0	0	0.0367934	0	0	0	0	0	0	0	0	0	0	0	0	0	0	0	0	0	0	0	0	0	0	0	0	0	0	0	0
Cystobacter	0	0	0	0	0	0	0	0	0	0	0	0	0	0	0	0	0	0	0	0	0	0	0	0	0	0	0	0.0250591	0	0	0	0	0	0	0	0	0	0	0	0	0	0	0	0	0	0	0	0	0
Cytophaga	0	0	0	0.0632362	0	4.98005	8.23772	0	0	0.0925833	0	0	0	1.19165	0	0	0	0	0	0	0.0152547	0	0.142156	0	0	0	0	0.327539	0	0	0	0	0	0	0.0525759	0	0	0	0	0	0	0	0	0	0	0	0	0	0
Cytophagaceae_norank	0	0	0	0	0	0	0	0	0	0	0	0	0	0	0	0	0	0	0	0	0.035548	0	0	0	0	0	0	0	0	0	0.121275	0	0	0	0	0.0231111	0	0	0	0	0	0	0	0	0	0	0.0875942	0	0.0141733
Cytophagales_norank	0.033716	0	0	0.0100561	0	1.19627	0	0	0	0	0	0	0	0	0	0	0	0	0	0	0.346565	0	0	0	0.12833	0	0	0.0918957	0	0	0	0	0	0	0	0	0	0.0151068	0	0	0	0	0	0	0	0	0	0	0
Cytophagia_norank	0	0	0	0	0	0	0	0	0	0	0	0	0	0	0	0	0	0	0	0	0	0	0	0	0	0	0	0	0	0	0	0	0	0	0	0.0599131	0	0	0	0	0	0	0	0	0	0	0	0	0
Dactylococcopsis	0	0	0	0	0	0	0	0	0	0	0	0	0	0	0	0	0	0	0	0	0	0	0	0	0	0	0	0	0	0	0	0	0	0	0	0	0	0	0	0	0	0	0	0	0	0	0	0	0
Dactylosporangium	0	0	0	0	0	0	0	0	0	0	0	0	0	0	0	0	0	0	0	0.0528593	0	0	0	0	0	0	0	0	0	0	0	0	0	0	0	0	0	0	0	0	0	0	0	0	0	0	0	0	0
Daphniidae	0	0	0	0	0	0	0	0	0	0	0	0	0	0	0	0	0	0	0.0453783	0	0	0	0	0	0	0	0	0	0	0	0	0	0	0	0	0	0	0	0	0	0	0	0	0	0	0	0	0	0
Debaryomycetaceae	0	0	0	0	0	0	0	0	0	0	0	0	0	0	0	0	0	0	0.112949	0	0	0	0	0	0	0	0	0	0	0	0	0	0	0	0	0	0	0	0	0	0	0	0	0	0	0	0	0	0
Dechloromonas	0	0	0	0	0	0	0	0	0	0	0	0	0	0	0	0	0	0	0	0	0	0	0	0	0	0	0	0	0	0	0	0	0	0	0	0	0	0	0	0	0	0	0	0	0	0	0	0	0
Defluviicoccus	0	0	0	0	0	0	0	0	0	0	0	0	0	0	0	0	0	0	0	0	0	0	0	0	0	0	0	0.273151	0	0	0	0	0	0	0	0	0	0	0	0	0	0	0	0	0	0	0	0	0
Defluviitalea	3.14589	0	0	0	0	0	0.161132	0	0	0	0	0	0	0	0	0	0	0	0.452369	0	0.0427397	0	0	0	0	0	0	0	0.934455	0	0	0	0	0	0	0	0	0	0	0	0	0	0	0	0	0	0	0	0
Defluviitoga	0.192879	0	0	0	0	0	0	0	0	0	0	0	0	0	0	0	0	0	0	0	0	0	0	0	0	0	0	0	0	0	0.239883	0	0	0	0	0	0	0	0	0	0	0	0	0	0	0	0	0	0
Dehalobacter	0	0	0	0	0	0	0	0	0	0	0	0	0	0	0.0772226	0	0	0	0	0	0	0	0	0	0	0	0	0	0	0	0	0	0	0	0	0	0	0	0.0772226	0	0	0	0	0	0	0	0	0	0
Dehalobacterium	0	0	0	0	0	0	0	0	0	0	0	0	0	0	0	0	0	0	0	0	0	0	0	0	0	0	0	0	0	0	0	0	0	0	0	0	0	0	0	0	0	0	0	0	0	0	0	0	0.151191
Dehalococcoides	0	0	0	0	0	0	0	0	0	0	0	0	0	0	0	0	0	0	0	0	0	0	0	0	0	0	0	0	0	0	0	0	0	0	0	0	0	0	0	0	0	0	0	0	0	0	0.0780503	0	0
Dehalococcoidia_norank	0	0	0	0	0	0	0	0.0139288	0	0	0	0	0	0	0	0	0	0	0	0	0	0	0	0	0	0	0	0	0.024241	0	0	0	0	0.218617	0	0	0	0	0	0	0	0	0	0	0	0	0	0	0
Deinococcus	0	0	0	0.064341	0	0	0	0	0	0.0212867	0	0	0	0	0	0	0	0	0	0	0.112715	0	0	0	0	0	0	0	0.48279	0	0	0	0	0	0.0107091	0	0	0.0764687	0	0	0	0	0	0	0	0	0	0	0
Delphacidae	0	0	0	0	0	0	0	0	0	0	0	0	0	0	0	0	0	0	0	0	0	0	0	0	0	0	0	0	0	0	0	0	0	0	0	0	0	0	0	0	0	0	0	0	0	0	0.0199012	0	0
Deltaproteobacteria_norank	0	0	0	0.0766622	0	0	0	0	0	0	0	0	0	0	0	0	0	0	0	0.0399841	0	0	0	0	0	0	0.0141986	0	0	0	0	0	0	0	0	0	0	0	0	0	0	0	0	0	0	0	0.0384555	0	0
Demequina	0	0	0	0.0268017	0	0	0	0	0	0	0	0	0	0	0	0	0	0	0	0	0	0	0	0	0	0	0	0	0	0	0	0	0	0	0	0	0	0	0	0	0	0	0	0	0	0	0	0	0
Deminuibacter	0	0	0	0.0233334	0	0	0	0	0	0	0	0	0	0	0	0	0	0.0778559	0	0	0.0233334	0	0	0	0	0	0	0	0	0	0	0	0	0	0	0	0	0	0	0	0	0	0	0	0	0	0	0	0
Dendrosporobacter	0	0	0	0	0	0	0	0	0	0	0	0	0	0	0	0	0	0	0	0	0	0	0	0	0	0	0	0	0	0	0	0	0	0	0	0	0	0	0	0	0	0	0	0	0	0	0	0	0
Denitrobacterium	0	0	0	0	0	0	0	0	0	0	0	0	0	0	0	0	0	0	0	0	0	0	0	0	0	0	0	0	0	0	0	0	0	0	0	0	0	0	0	0	0	0	0	0	0	0	0	0	0
Desmospora	0	0	0	0	0	0	0	0	0	0	0	0	0	0	0	0	0	0	0	0	0	0	0	0	0	0.0782224	0	0	0	0	0	0	0	0	0.0601845	0	0	0	0	0	0	0	0	0	0	0	0	0	0
Desnuesiella	0.0313614	0	0	0	0	0	0	0	0	0	0	0	0	0	0	0	0	0	0	0	0	0	0	0	0	0	0	0	0	0.0975534	0	0	0	0	0	0	0	0	0	0	0	0	0	0	0	0	0	0	0
Desulfallas	0	0	0	0	0	0	0	0	0	0	0	0	0	0	0	0	0	0	0	0	0	0	0	0	0	0	0	0	0	0	0	0	0	0	0	0	0	0	0	0	0	0	0	0	0	0	0	0	0
Desulfamplus	0	0	0	0	0	0	0	0	0	0	0	0	0	0	0	0	0	0	0	0	0	0	0	0	0	0	0	0	0	0	0	0	0	0	0	0	0	0	0	0	0	0	0	0	0	0	0	0	0
Desulfitibacter	0	0	0	0.222325	0	0	0	0	0	0	0	0	0	0	0	0	0	0	0	0	0	0	0	0	0	0	0	0	0	0	0	0	0	0	0	0	0	0	0	0	0	0	0	0	0	0	0	0	0
Desulfitobacterium	0	0	0	0	0	0	0	0	0	0	0	0	0	0	0	0	0	0	0	0	0	0	0	0	0	0	0	0.0870663	0	0	0	0	0	0	0	0	0	0	0	0	0	0	0	0	0	0	0	0	0
Desulfobacter	0	0	0	0	0	0	0	0	0	0	0	0	0	0	0	0	0	0	0	0	0	0	0	0	0	0	0	0	0	0	0	0	0	0	0	0	0	0	0	0	0	0	0	0	0	0	0	0	0
Desulfobacterales_norank	0	0	0	0	0	0	0	0.0196051	0	0	0	0	0	0	0	0	0	0	0	0	0	0	0	0	0	0	0	0	0	0	0.0335998	0	0	0	0	0	0	0	0	0	0	0	0	0	0	0	0	0	0
Desulfobacterium	0	0	0	0	0	0	0.0229083	0	0	0	0	0	0	0	0	0	0	0	0	0	0	0	0	0	0	0	0	0	0	0	0	0	0	0	0	0	0	0	0	0	0	0	0	0	0	0	0	0	0
Desulfobacula	0	0	0	0	0	0	0	0	0	0	0	0	0	0	0	0	0	0	0	0	0	0	0	0	0	0	0	0	0	0	0	0	0	0	0	0	0	0	0	0	0	0	0	0	0	0	0	0	0
Desulfobotulus	0	0	0	0	0	0	0	0	0	0	0	0	0	0	0	0	0	0	0	0	0	0	0	0	0	0	0	0	0	0	0	0	0	0	0	0	0	0	0	0	0	0	0	0	0	0	0	0	0
Desulfobulbus	0	0	0	0	0	0	0	0	0	0	0	0	0	0	0	0	0	0	0	0	0	0	0	0	0	0	0.0251581	0	0	0	0	0	0	0	0	0	0	0	0	0	0	0	0	0	0	0	0	0	0
Desulfocarbo	0	0	0	0	0	0	0	0	0	0	0	0	0	0	0	0	0	0	0	0	0	0	0	0	0	0	0	0	0	0	0	0	0	0	0	0	0	0	0	0	0	0	0	0	0	0	0	0	0
Desulfofarcimen	0	0	0	0	0	0	0	0	0	0	0	0	0	0	0	0	0	0	0	0	0	0	0	0	0	0	0	0	0	0	0	0	0	0	0	0	0	0	0	0	0	0	0	0	0	0	0	0	0
Desulfofundulus	0	0	0	0	0	0	0	0	0	0	0	0	0	0	0	0	0	0	0	0	0	0	0	0	0	0	0	0	0	0	0	0	0	0	0	0	0	0	0	0	0	0	0	0	0	0	0	0	0
Desulfoglaeba	0	0	0	0	0	0	0	0	0	0	0	0	0	0	0	0	0	0	0	0	0	0	0	0	0	0	0	0	0	0.0477341	0	0	0	0	0	0	0	0	0	0	0	0	0	0	0	0	0	0	0
Desulfohalotomaculum	0	0	0	0	0	0	0	0	0	0	0	0	0	0	0	0	0	0	0	0	0	0	0	0	0	0	0	0	0	0	0	0	0	0	0	0	0	0	0	0	0	0	0	0	0	0	0	0	0
Desulfomicrobium	0	0	0	0	0	0	0.0427818	0	0	0	0	0	0	0	0	0	0	0	0	0	0	0	0	0	0	0	0	0	0	0	0	0	0	0	0	0	0	0	0	0	0	0	0	0	0	0	0	0	0
Desulfonatronum	0	0	0	0	0	0	0	0	0	0	0	0	0	0	0	0	0	0	0	0	0	0	0	0	0	0	0	0	0	0	0	0	0	0	0	0	0	0	0	0	0	0	0	0	0	0	0	0	0
Desulfonema	0	0	0	0	0	0	0	0	0	0	0	0	0	0	0	0	0	0	0	0	0	0	0	0	0	0	0	0	0	0	0	0	0	0	0	0	0	0	0	0	0	0	0	0	0	0	0	0	0
Desulfonispora	0	0	0	0	0	0	0	0	0	0	0	0	0	0	0	0	0	0	0	0	0	0	0	0	0	0	0	0	0	0	0	0	0	0	0	0	0	0	0	0	0	0	0	0	0	0	0	0	0
Desulfosporosinus	0	0	0	0	0	0	0	0	0	0	0	0	0	0	0	0	0	0	0	0	0	0	0	0	0	0	0	0	0	0	0	0	0	0	0	0	0	0	0	0	0	0	0	0	0	0	0.0271403	0	0
Desulfotomaculum	0	0	0	0.0528327	0	0	0	0	0	0	0	0	0	0	0	0	0	0	0	0	0	0	0	0	0	0	0	0	0	0	0	0	0	0	0	0	0	0	0	0	0	0	0	0	0	0	0	0	0.138492
Desulfovibrio	0.233689	0	0	0.230553	0	0	0	0	0	0	0	0	0	0	0	0	0	0	0	0	0	0	0	0	0	0	0	0	0	0	0	0	0	0	0	0	0	0	0	0	0	0	0	0	0	0	0	0	0
Desulfovibrionaceae_norank	0	0	0	0	0	0	0	0	0	0	0	0	0	0	0	0	0	0	0	0	0	0	0	0	0	0	0	0	0	0	0	0	0	0	0	0	0	0	0	0	0	0	0	0	0	0	0	0	0
Desulfuribacillus	0	0	0	0	0	0	0	0	0	0	0	0	0	0	0	0	0	0	0	0	0	0	0	0	0	0	0	0	0	0	0	0	0	0	0	0	0	0	0	0	0	0	0	0	0	0	0	0	0
Desulfurococcus	0	0	0	0	0	0	0	0	0	0	0	0	0	0	0	0	0	0	0	0	0	0	0	0	0	0	0	0	0	0	0	0	0	0	0	0	0.0420463	0	0	0	0	0	0	0	0	0	0	0	0
Desulfuromonadaceae_norank	0	0	0	0	0	0	0	0	0	0	0	0	0	0	0	0	0	0	0	0	0	0	0	0	0	0	0	0	0	0	0	0	0	0	0	0	0	0	0	0	0	0	0	0	0	0	0	0	0
Desulfuromonas	0	0	0	0	0	0	0	0	0	0	0	0	0	0	0	0	0	0	0	0	0	0	0	0	0	0	0	0	0	0	0	0	0	0	0	0	0	0	0	0	0	0	0	0	0	0	0	0	0
Dethiobacter	0	0	0	0	0	0	0	0	0	0	0	0	0	0	0	0	0	0	0	0	0	0	0	0	0	0	0	0.346678	0	0	0	0	0	0	0	0	0	0	0	0	0	0	0	0	0	0	0	0	0
Dethiosulfatibacter	0	0	0	0	0	0	0	0	0.0983625	0	0	0	0	0	0	0	0	0	0	0	0	0	0	0	0	0	0	0	0	0	0	0	0	0	0	0	0	0	0	0	0	0	0	0	0	0	0	0	0
Devosia	0	0	0	0.020863	0	0	0	0	0	0	0	0	0	0	0	0	0	0	0	0	4.20192	0	0	0	0	0	0	0	0	0	0	0	0	0.0378032	0	0	0	0	0	0	0	0	0	0	0	0	0.0273856	0	0
Dialister	0	0	0	0	0	0	0	0	0	0	0	0	0	0	0	0	0	0	0	0	0	0	0	0	0	0	0	0	0	0	0	0	0	0	0	0	0	0	0	0	0	0	0	0	0	0	0	0	0
Dickeya	0	0	0	0	0	0	0	0	0	0	0	0	0	0	0	0	0	0	0	0	0	0	0	0	0	0	0	0	0	0	0	0	0	0	0	0	0	0	0	0	0	0	0	0	0	0	0	0	0
Dictyobacter	0	0.018857	0	0.151292	0	0	0	0.0505529	0	0	0	0	0	0	0	0	0	0	0	0	0	0	0	0	0	0	0	0	0	0.0175186	0	0	0	0	0	0	0	0.107318	0	0	0	0	0	0	0	0	0.0807693	0	0
Dictyoglomus	0.0348084	0	0	1.78279	0	0	0	0.0958651	0	0.469969	0	0	0	0	0	0	0	0	0	0	0	0	0	0	0	0	0	0	0.0247479	0	0	0	0	0	0	0.178579	0	0.0332955	0	0	0	0	0	0	0	0	0	0	0
Dictyostelium	0	0	0	0	0	0	0	0	0	0	0	0	0	0	0	0	0	0	0	0	0	0	0	0	0	0	0	0	0	0	0	0	0	0	0	0	0	0	0	0	0	0	0	0	0	0	0	0	0
Dielma	0	0	0	0	0	0	0	0.812617	0	0	0	0	0	0	0	0	0	0	0	0	0	0	0	0	0	0	0	0	0	0	0	0	0	0	0	0	0	0	0	0	0	0	0	0	0	0	0	0	0
Dinghuibacter	0	0	0	0.0496817	0	0	0	0	0	0	0	0	0	0	0	0	0	0	0	0	0	0	0	0	0	0	0	0	0	0.921396	0	0	0	0	0	0.0404103	0	0	0	0	0	0	0	0	0	0	0	0	0
Diphyllobothriidae	0	0	0	0	0	0	0	0	0	0	0	0	0	0	0	0	0	0	0.0252413	0	0	0	0	0	0	0	0	0	0	0	0	0	0	0	0	0	0	0	0	0	0	0	0	0	0	0	0	0	0
Dissoconiaceae	0	0	0	0	0	0	0	0	0	0	0	0	0	0	0	0	0	0	0	0	0	0	0	0	0	0	0	0	0	0	0	0	0	0	0	0	0	0	0	0	0	0	0	0	0	0	0	0	0
Diversisporaceae	0	0	0	0	0	0	0	0	0	0	0	0	0	0	0	0	0	0	0	0	0	0	0	0	0	0	0	0	0	0	0	0	0	0	0	0	0	0	0	0	0	0	0	0	0	0	0	0	0
Dokdonia	0	0	0	0	0	0	0	0	0	0	0	0	0	0	0	0	0	0	0	0	0	0	0	0	0	0	0	0	0	0	0	0	0	0	0	0	0	0	0	0	0	0	0	0	0	0	0.0233416	0	0
Dolichospermum	0	0	0	0	0	0	0	0	0	0	0	0	0	0	0	0	0	0	0	0	0	0	0	0	0	0	0.0197244	0	0	0	0	0	0	0	0	0	0	0	0	0	0	0	0	0	0	0	0	0	0
Dolosigranulum	0	0	0	0	0	0	0	0	0	0	0	0	0	0	0	0	0	0	0	0	0	0	0	0	0	0	0	0	0	0	0	0	0	0	0	0	0	0	0	0	0	0	0	0	0	0	0	0	0
Domibacillus	0	0	0	0	0	0	0	0	0	0	0	0	0	0	0	0	0	0	0	0	0.368317	0	0	0	0	0	0	0	0	0	0	0	0	0	0	0.0963621	0	0	0	0	0	0	0	0	0	0	0	0	0
Donghicola	0	0	0	0	0	0	0	0	0	0	0	0	0	0	0	0	0	0	0	0	0	0	0	0	0	0	0	0	0	0	0	0	0	0	0	0	0	0	0	0	0	0	0	0	0	0	0	0	0
Dorea	0.996565	0	0	0	0	0	0	0	0	0	0	0	0	0	0	0	0	0.132904	0.567525	0	0.815553	0	0.304814	0	0	0.137234	0	0.0220753	0.360742	0.155453	0	0	0	0	0	0.0810059	0	0.194262	0	0	0	0	0	0	0	0	0	0	0
Draconibacterium	5.42272	3.35831	0	5.31368	0	0.249522	0	0	0	0	0	0	0	0	0	0	0	0.0275211	0.105088	0	7.89637	0	0.345012	0	0	0	0	0.188366	0	0	0	0	0	0	0	0.0736166	0	0.160227	0	0	0	0	0	0.0575701	0	0	0	0	0.0241772
Drancourtella	0.0942729	0	0	0	0	0	0	0	0	0	0	0	0	0	0	0	0	0.0257711	0.183488	0.0705743	0	0	0	0	0	0	0	0.590343	0.187409	0	0.0230418	0	0	0	0	0	0	0	0	0	0	0	0	0	0	0	0	0	0
Drosophilidae	0	0	0	0	0	0	0	0	0	0	0	0	0	0	0	0	0	0	0	0	0	0	0	0	0	0	0	0	0	0	0	0	0	0	0	0	0	0	0	0	0	0	0	0	0	0	0	0	0
Dubosiella	0	0	0	0	0	0	0	0	0	0	0	0	0	0	0	0	0	0	0	0	0	0	0	0	0	0	0	0	0	0	0	0	0	0	0	0	0	0	0	0	0	0	0	0	0	0	0	0	0
Duganella	0	0	0	0.057203	0	0	0	0	0	0	0	0	0	0	0	0	0	0	0	0	0	0	0	0	0	0	0	0	0	0	0	0	0	0	0	0	0.0288071	0.0584279	0	0	0	0	0	0	0	0	0.0186001	0	0
Duncaniella	0	0	0	0	0	0	0	0	0	0	0	0	0	0	0	0	0	0	0.0637187	0	0.0250696	0	0	0	0	0	0	0	0.33436	0	0	0	0	0	0	0.897658	0	0	0	0	0	0	0	0	0	0	0	0	0
Dyadobacter	0.151178	1.00907	0	0.125723	0	0	0	0	0	0.034215	0	0	0	0	0	0	0	0	0	0	0.133147	0.230759	0	0	0	0	2.83334	0.142519	0.0574759	0.803874	0.0845286	0	0	0.221782	0	2.04949	0	0.172565	0	0	0	0	0	0	0	0	0.0555348	0	0.0152268
Dyella	0	0	0	0	0	0	0	0	0	0	0	0	0	0	0	0	0	0.19769	0	0.0203158	0	0	0	0	0	0	0.0184774	0	0	0.0458019	0.0114963	0	0	0	0	0	0	0	0	0	0	0	0	0	0	0	0	0	0
Dysgonamonadaceae_norank	0.11263	0.0175981	0	0	0	0.0495048	0	0	0	0	0	0	0	0	0	0	0	0	0	0	0.300151	0	0	0	0	0	0	0	0	0.0275667	0	0	0	0	0	0	0	0	0	0	0	0	0	0	0	0	0	0	0.114018
Dysgonomonas	4.93835	3.45829	0	0.327068	0	0	0.385365	0	0	0.0798271	0	0.0588141	0.91389	0	0	0	0	3.33099	0.693964	0	5.33646	0	0.702174	0	0	0.230487	0.108076	3.47481	17.0441	0.0729802	0.0248563	0	0	0.874061	0.382347	0.306946	0.948719	17.4822	0	0.491963	0	0	0	0	0	0.0156382	0	0	0
Dysosmobacter	1.53735	0	0	0	0	0	0	0	0	0	0	0	0	0	0	0	0	0	0	0	0	0	0	0	0	0	0	0	0	0	0	0	0	0	0	0	0	0	0	0	0	0	0	0	0	0	0	0	0
Echinicola	0	0	0	0	0	0	0	0	0	0	0	0	0	0	0	0	0	0	0	0	0.557682	0	0	0	0	0	0	0	0.328597	0	0	0	0	0	0	0.597296	0	0.0231249	0	0	0	0	0	0	0	0	0	0	0
Edaphobacter	0	0	0	0	0	0	0	0	0	0	0	0	0	0	0	0	0	0	0.381041	0.0248359	0	0	0	0	0	0	0	0	0	0	0	0	0	0	0	0	0	0	0	0	0	0	0	0	0	0	0	0	0
Effusibacillus	0	0	0	0	0	0	0	0	0	0	0	0	0	0	0	0	0	0	0	0	0	0	0	0	0	0	0	0	0	0	0	0	0	0	0	0	0	0	0	0	0	0	0	0	0	0	0.0228168	0	0
Eggerthella	0.0292754	0	0	0	0	0	0	0	0	0	0	0	0	0	0	0	0	0	0	0	0	0	0	0	0	0	0	0	0	0	0	0	0	0	0	0	0	0	0	0	0	0	0	0	0	0	0	0	0
Eggerthellaceae_norank	0	0.376663	0	0.0539191	0	0	0	0	0	0	0	0	0	0	0.0175599	0	0	0	0	0	0	0	0	0	0	0	0	0	0.176416	0	0	0	0	0	0	0	0	0	0.0175599	0	0	0	0	0	0	0	0.0784901	0	0
Eggerthia	0	0	0	0	0	0	0	0.0415466	0	0	0	0	0	0	0	0	0	0	0	0	0	0	0	0	0	0	0	0	0	0	0	0	0	0	0	0	0	0	0	0	0	0	0	0	0	0	0	0	0
Eikenella	0	0	0	0	0	0	0	0	0	0	0	0	0	0	0	0	0	0	0	0	0	0	0	0	0	0	0	0	0	0	0	0	0	0	0	0	0	0	0	0	0	0	0	0	0	0	0	0	0
Eisenbergiella	22.2853	0.129459	0	9.65514	0	0	0	0.183669	0	1.0777	0	0.164894	0.474573	0.524628	0	2.28477	0	0.160781	2.38809	4.92629	14.3396	0	10.1964	0	0.126102	0.460862	0	0.0493729	34.849	2.87626	1.5181	0.317082	0	0.249767	3.89841	2.4711	0	6.94717	0	0	0	0	0	0	0	0.203584	0	0	0
Elapidae	0	0	0	0	0	0	0	0	0	0	0	0	0	0	0	0	0	0	0.25728	0	0	0	0	0	0	0	0	0	0	0	0	0	0	0	0	0	0	0	0	0	0	0	0	0	0	0	0	0	0
Elizabethkingia	0	0	0	0	0	0	0	0	0	0	0	0	0	0	0	0	0	0	0	0	0	0	0	0	0	0	0	0	0	0	0	0	0	0	0	0	0	0	0	0	0	0	0	0	0	0	0	0	0
Elusimicrobia_norank	0.532669	0.0909493	0	0.133815	0	0.0900326	0.0470648	0	0	0	0	0	0	0	0	0	0	0.0796606	0.761571	0	0	0	0	0	0	1.09968	0.0648916	0	0	0	0	0.0712834	0	0	0	0.0817537	0.0147952	2.12832	0	0	0	0	0	0	0	0	0.0126046	0	0
Elusimicrobium	0.24507	0	0	0	0	0	0	0	0	0	0	0	0	0	0	0	0	0	0	0	0	0	0	0	0	0	0	0	0	0	0	0	0	0	0	0	0	0	0	0	0	0	0	0	0	0	0	0	0
Embleya	0	0	0	0	0	0	0	0	0	0	0	0	0	0	0	0	0	0	0	0	0	0	0	0	0	0	0	0	0	0	0	0	0	0	0	0	0	0	0	0	0	0	0	0	0	0	0	0	0
Emergencia	0.0401404	0	0	0.0874696	0	0	0	0	0	0	0	0	0	0	0	0	0	0	0	0	0	0	0	0	0	0	0	0.0811367	0	0	0	0	0	0	0	0	0	0	0	0	0	0	0	0	0	0	0	0	0
Emticicia	0	0	0	0	0	0	0	0	0	0	0	0	0	0	0	0	0	0	0	0	0.0125283	0	0	0	0	0	0	0	0.0556237	0	0.0185239	0	0	0	0.0158094	0.0941994	0	0.186768	0	0	0	0	0	0	0	0	0.0103257	0	0
Endogonaceae	0	0	0	0	0	0	0	0	0	0	0	0	0	0	0	0	0	0	0	0	0	0	0	0	0	0	0	0	0	0	0	0	0	0	0	0	0	0	0	0	0	0	0	0	0	0	0	0	0
Endomicrobium	0	0	0	0.0944896	0	0	0.118413	0	0	0	0	0	0	0	0	0	0	0	0	0	0	0	0	0	0	0	0	0	0	0	0	0	0	0	0	0	0	0	0	0	0	0	0	0	0	0	0	0.143205	0
Endozoicomonas	0	0	0	0	0	0	0	0	0	0	0	0	0	0	0	0	0	0	0	0	0	0	0	0	0	0	0	0	0.0193278	0	0	0	0	0.0107377	0	0	0	0	0	0	0	0	0	0	0	0	0	0	0
Enhydrobacter	0	0	0	0	0	0	0	0	0	0	0	0	0	0	0	0	0	0	0	0	0	0	0	0	0	0	0	0	0	0	0	0	0	0	0	0	0	0	0	0	0	0	0	0	0	0	0	0	0
Enorma	0	0	0	0	0	0	0	0.0685079	0	0	0	0	0	0	0	0	0	0	0	0	0	0	0	0	0	0	0	0	0	0	0	0	0	0	0	0	0	0	0	0	0	0	0	0	0	0	0	0	0
Entamoeba	0.0177156	0	0	0.0390821	0	0	0	0	0	0	0	0	0	0	0	0	0	0	1.87238	0	0	0	0	0	0	0	0	0.0687617	0	0	0.421474	0	0	0	0	0	0	0	0	0	0	0	0	0	0	0	0	0	0
Enterobacter	0	0	0	0	0	0	0	0	0	0	0	0	0	0	0	0	0	0	0.0670648	0	0	0	0	0	0	0	0	0	0	0	0	0	0	0	0	0	0	0	0	0	0	0	0	0	0	0	0	0	0
Enterobacterales_norank	0	0	0	0	0	0	0	0	0	0	0	0	0	0	0	0	0	0	0	0	0	0	0	0	0	0	0	0	0	0	0	0	0	0	0	0	0	0.0232655	0	0	0	0	0	0	0	0	0	0	0
Enterobacteriaceae_norank	0	0	0	0	0	0	0	0	0	0	0	0	0	0	0	0	0	0	0	0	0	0	0	0	0	0	0	0	0	0.0342864	0	0	0	0	0	0	0	0	0	0	0	0	0	0	0	0	0	0	0
Enterococcus	0.164766	0	0	0.10736	0	0	0	0.221336	0.0946387	0.0220845	0	0	0	0	0	0	0	0	0	0.0231058	0.419218	0	0.00927706	0	0	0	0.0450419	3.13565	0.194442	0.0538644	0	0	0	0	0.0363781	1.52103	0.0320449	0.617957	0	0	0	0	0	0	0	0	0	0	0
Enterorhabdus	0	0	0	0.0452525	0	0	0	0	0	0	0	0	0	0	0	0	0	0	0	0	0	0	0	0	0	0	0	0	0.0577506	0	0	0	0	0	0	0	0	0	0	0	0	0	0	0	0	0	0	0	0
Enteroscipio	0	0	0	0	0	0	0	0	0	0	0	0	0	0	0	0	0	0	0	0	0	0	0	0	0	0	0	0	0	0	0	0	0	0	0	0	0	0	0	0	0	0	0	0	0	0	0	0	0
Ephemeroptericola	0.411827	0	0	0	0	0	0	0	0	0	0	0	0	0	0	0	0	0	0	0	0	0	0	0	0	0	0	0	0	0	0	0	0	0	0	0	0	0	0	0	0	0	0	0	0	0	0	0	0
Epidinium	0	0	0	44.6385	0	18.0293	0	0	0	8.42805	0.680846	0	0	0	0	0	0	0	0	0	0	0	0	0	0	0	0	0	0	0	0	0	0	0	0	0	0	0	0	0	0	0	0	0	0	0	0	0	0
Epsilonproteobacteria_norank	0.0217476	0	0	0	0	0	0	0	0	0	0	0	0	0	0	0	0	0	0	0	0.39131	0	0	0	0	0	0	0	0.603908	0	0	0	0	0	0	0	0	0	0	0	0	0	0	0	0	0	0	0	0
Epulopiscium	0.0462446	0.147796	0	0	0	0	0	0	0	0	0	0	0	0	0	0	0	0	0	0	0.0799646	0	0	0	0	0	0	1.59976	0.142106	0	0.0609067	0	0	0	0	0	0	0	0	0	0	0	0	0	0	0	0	0	0
Ereboglobus	0	2.08697	0	0	0	0	0	0	0	0	0	0	0	0	0	0	0	0	0	0	0.0557652	0	0	0	0	0	0	0	1.43245	0.282884	0	0	0	0.0768546	0	0	0	0	0	0	0	0	0	0	0	0	0	0	0
Eresidae	0	0	0	0	0	0	0	0	0	0	0	0	0	0	0	0	0	0	0.23205	0	0	0	0	0	0	0	0	0	0	0	0	0	0	0	0	0	0	0	0	0	0	0	0	0	0	0	0	0	0
Erwinia	0	0	0	0	0	0	0	0.0468231	0	0	0	0	0	0	0	0	0	0	0	0	0	0	0	0	0	0	0	0	0	0	0	0	0	0	0	0	0	0	0	0	0	0	0	0	0	0	0	0	0
Erysipelatoclostridium	3.67528	0.0908018	0	0.324699	0	0	0	3.26214	0	0	0	0	0	0	0	0	0	0	0.182191	0	0	0	0.0543058	0	0	0	0.0214514	0.27236	1.02125	0	0	0	0	0	0	0.0509207	0	0	0	0	0	0	0	0	0	0	0	0	0
Erysipelothrix	0.0947093	0	0	0	0	0	0	0	0	0	0	0	0	0	0	0	0	0	0	0	0	0	0	0	0	0	0	0	0	0	0	0	0	0	0	0	0	0	0	0	0	0	0	0	0	0	0	0	0
Erysipelotrichaceae_norank	4.17353	0	0	0.434072	0	0.285274	0.0356481	12.1953	0	0.0118847	0	0	0	0	0	0	0	0	4.73613	0	1.37653	0	0	0	0	0.0453126	0	0.16725	1.24148	0.0414801	0	0	0	0	4.77873	4.23107	0	0.387319	0	0	0	0	0	0	0	0	0.0588255	0	0
Erysipelotrichales_norank	0	0	0	0	0	0	0	0	0	0	0	0	0	0	0	0	0	0	0	0	0	0	0	0	0	0	0	0	0	0	0	0	0	0	0	0	0	0	0	0	0	0	0	0	0	0	0	0	0
Erysipelotrichia_norank	0	0	0	0.0210897	0	0.0882783	0	0.0879584	0	0	0	0	0	0	0	0	0	0	0	0	0	0	0	0	0	0	0	0	0	0	0	0	0	0.0323729	0	0	0	0	0	0	0	0	0	0	0	0	0	0	0
Erysiphaceae	0	0	0	0	0	0	0	0	0	0	0	0	0	0	0	0	0	0	0	0	0	0	0	0	0	0	0	0	0	0	0	0	0	0.0375152	0	0	0	0	0	0	0	0	0	0	0	0	0	0	0
Erythrobacter	0	0	0	0	0	0	0.0478478	0	0	0	0	0	0	0	0	0	0	0	0	0	0	0	0	0	0	0	0	0	0	0	0	0	0	0	0	0	0	0	0	0	0	0	0	0	0	0	0	0	0
Escherichia	5.92112	0	0	0.224578	0	0	0	0.721011	0	0	0	0	0	0.152804	0	0	0	0	0.181087	1.18197	0	0	0	0	0	0.725672	0	0	0.305682	0	0	0	0	0	0	0	0	0	0	0	0	0	0	0	0	0	0	0	0
Esocidae	0	0	0	0	0	0	0	0	0	0	0	0	0	0	0	0	0	0	0	0	0	0	0	0	0	0	0	0	0	0	0	0	0	0	0	0	0	0	0	0	0	0	0	0	0	0	0	0	0
Ethanoligenens	0	0	0	0.0332716	0	0	0	0	0	0	0	0	0	0	0	0	0	0	0	0.0127351	0	0	0	0	0	0	0	0	0.133098	0	0	0	0	0	0	0	0	0	0	0	0	0	0	0	0	0	0	0	0.0632331
Eubacteriaceae_norank	0.310592	0	0	3.21644	0	0	0.151287	0.0291025	0	0	0	0	0	0	0	0	0	0	0	0	0	0	0	0	0.177299	0	0	0.192459	0.190068	0.110735	0	0	0	0	0	0.0168845	0	0.0214086	0	0	0	0	0	0.0251191	0.282619	0	0	0.356527	0
Eubacterium	45.8897	1.20683	0	11.6055	0	1.01068	4.9592	3.76686	0.227973	5.41617	0.20543	0.576171	0	0.970706	0.0141735	0	0	0	9.8153	0.639316	23.1059	0	3.72476	0	0	0.165727	0.0868549	25.6099	35.3461	0.946793	0.110751	0	0	3.10308	2.78149	4.80384	0.331225	0.754464	0.0141735	1.90766	0.153905	0	0	1.34947	7.29144	0	5.39749	1.58568	0
Eudiplodinium	0	0	0	0	0	0	0	0	0	13.3187	0	0	0	0	0	0	0	0	0	0	0	0	0	0	0	0	0	0	0	0	0	0	0	0	0	0	0	0	0	0	0	0	0	0	0	0	0	0	0
Euphorbiaceae	0	0	0	0	0	0	0	0	0	0	0	0	0	0	0	0	0	0	0	0	0	0	0	0	0	0	0	0	0	0	0	0	0	0	0	0.0281191	0	0	0	0	0	0	0	0	0	0	0	0	0
Euplotes	0	0	0	0	0	0	0	0	0	0	0	0	0	0	0	0	0	0	0	0	0	0	0	0	0	0	0	0	0	0	0	0	0	0	0	0	0	0	0	0	0	0	0	0	0	0	0	0	0
Euryarchaeota_norank	0	0	0	0	0	0	0	0	0	0	0	0	0	0	0	0	0	0	0	0	0	0	0	0	0	0	0	0	0.0390641	0	0	0	0	0	0	0	0	0	0	0	0	0	0	0	0	0	0	0	0
Evtepia	0	0	0	0	0	0	0	0	0	0	0	0	0	0	0	0	0	0	0	0	0	0	0	0	0	0	0	0	0	0	0	0	0	0	0	0	0	0	0	0	0	0	0	0	0	0	0	0	0
Ewingella	0	0	0	0	0	0	0	0	0	0	0	0	0	0	0	0	0	0	0	0	0	0	0	0	0	0	0	0	0	0	0	0	0	0	0	0	0	0	0	0	0	0	0	0	0	0	0	0	0
Exiguobacterium	0.0500429	0	0	0	0	0	0	0.0441958	0	0	0	0	0	0	0	0	0	0	0.99335	0	2.14753	0	0	0	0	0	0	0.0265086	0	0	0	0	0	0	0	0	0	0	0	0	0	0	0	0	0	0	0	0	0
Extibacter	0	0	0	0	0	0	0	0	0	0	0	0	0	0	0	0	0	0	0	0	0	0	0	0	0	0	0	0	0.021422	0	0	0	0	0	0	0	0	0	0	0	0	0	0	0	0	0	0	0	0
Fabaceae	0	0	0	0	0	0	0	0	0	0	0	0	0	0	0	0	0	0	0.162627	0	0.0387621	0	0	0	0	0	0	0	0	0	0	0	0	0	0	0	0	0	0	0	0	0	0	0	0	0	0	0	0
Fabibacter	0	0	0	0	0	0	0	0	0	0	0	0	0	0	0	0	0	0	0	0	0	0	0	0	0	0	0	0.0138964	0	0	0	0	0	0	0	0	0	0	0	0	0	0	0	0	0	0	0.0123546	0	0
Facklamia	0.242679	0	0	0	0	0	0	0.146989	0	0	0	0	0	0	0	0	0	0	0	0	0.366636	0	0	0	0	0	0	0	0	0	0	0	0	0	0	0	0	0	0	0	0	0	0	0	0	0	0	0	0
Faecalibacillus	0	0	0	0	0	0	0	0	0	0	0	0	0	0	0	0	0	0	0	0	0	0	0	0	0	0	0	0.0177981	0	0	0	0	0	0	0	0	0	0	0	0	0	0	0	0	0	0	0	0	0
Faecalibacterium	17.2453	0	0	2.28364	0	0	4.74709	2.73863	0	4.00298	0	0.072752	4.39021	0.160351	0	1.71494	0	0.0490506	12.4734	0	4.7857	0	2.84137	0	0	0.86685	0	0.0347106	35.1286	2.88387	2.75805	0	0	0	2.12965	4.41991	0	2.74393	0	0	0	0	0	0	0	0	0.0536377	0	0
Faecalibaculum	0	0	0	0	0	0	0	0	0	0	0	0	0	0	0	0	0	0	0	0	0	0	0	0	0	0	0	0	0	0	0	0	0	0	0	0	0	0	0	0	0	0	0	0	0	0	0	0	0
Faecalicatena	1.2295	0	0	0.0294382	0	0.328289	0	0.498637	0	0	0	0	0	0	0	0.0222127	0	0.129445	0.0686488	0	3.13079	0	0	0	0.0957846	0.46322	0	0	1.73428	0.236594	2.10409	0	0	0	0.644442	0	0	0.642038	0	0	0	0	0	0	0	0	0	0	0
Faecalicoccus	0	0	0	0	0	0	0	0.911521	0	0	0	0	0	0	0	0	0	0	0	0	0	0	0	0	0	0	0	0	0	0	0	0	0	0	0	0.0272479	0	0	0	0	0	0	0	0	0	0	0	0	0
Faecalimonas	0.0242051	0	0	0	0	0	0	0	0	0	0	0	0	0	0	0	0	0	0	0	0	0	0	0	0	0	0	0	0	0	0	0	0	0	0	0	0	0	0	0	0	0	0	0	0	0	0	0	0
Faecalitalea	0	0	0	0	0	0	0	0.0436322	0	0	0	0	0	0	0	0	0	0	0	0	0	0	0	0	0	0	0	0	0	0	0	0	0	0	0	0	0	0	0	0	0	0	0	0	0	0	0	0	0
Fagaceae	0	0	0	0	0	0	0	0	0	0	0	0	0	0	0	0	0	0	0	0	0	0	0	0	0	0	0	0	0	0	0	0	0	0	0	0	0	0	0	0	0	0	0	0	0	0	0	0	0
Falsibacillus	0	1.02541	0	0	0	0	0	0	0	0	0	0	0	0	0	0	0	0	0	0	0	0	0	0	0	0	0	0	0	0	0	0	0	0	0	0	0	0	0	0	0	0	0	0	0	0	0	0	0
Fastidiosipila	0.0167348	0	0	0	0	0	0.0243973	0	0	0	0	0	0	0	0	0	0	0	0	0	0	0	0	0	0	0	0	0	0.284481	0	0	0	0	0	0	0	0	0	0	0	0	0	0	0	0	0	0	0	0
Fenollaria	0	0	0	0	0	0	0	0	0	0	0	0	0	0	0	0	0	0	0	0	0	0	0	0	0	0	0	0	0	0	0	0	0	0	0	0	0	0	0	0	0	0	0	0	0	0	0	0	0
Fermentimonas	0.00800931	0	0	0	0	0.0211717	0	0	0	0	0	0	0	0	0	0	0	0	0	0	0	0	0	0	0	0	0	3.87111	0	0	0	0	0	0	0	0.0912112	0	0.0161568	0	0	0	0	0	0	0	0	0	0	0
Ferroglobus	0	0	0	0	0	0	0	0	0	0	0	0	0	0	0	0	0	0	0	0	0	0	0	0	0	0	0	0	0	0	0	0	0	0	0	0	0	0	0	0	0	0	0	0	0	0	0	0	0
Ferruginibacter	0	0	0	0	0	0	0	0	0	0	0	0	0	0	0	0	0	0.136548	0	0	0	0	0	0	0	0	0	0	0.186693	0	0	0	0	0	0	0	0	0	0	0	0	0	0	0	0	0	0	0	0
Fervidicella	0	0	0	0	0	0	0	0	0	0	0	0	0	0	0	0	0	0	0	0	0	0	0	0	0	0	0	0	0	0	0	0	0	0	0	0	0	0	0	0	0	0	0	0	0	0	0	0	0
Fervidicoccus	0	0	0	0	0	0	0	0	0	0	0	0	0	0	0	0	0	0	0	0	0	0	0	0	0	0	0	0	0	0	0	0	0	0	0	0	0	0	0	0	0	0	0	0	0	0	0	0	0
Fervidobacterium	2.62812	0.0869818	0	0	0	0	0	0	0	0	0	0	0	0	0	0	0	0	0	0	0	0	0	0	0	0	0.075615	0	0	0	0	0	0	0	0	0	0	0	0	0	0	0	0	0	0	0	0	0	0.318372
Fibrella	0	0	0	0	0	0	0	0	0	0	0	0	0	0	0	0	0	0	0	0	0.219578	0	0	0	0	0	0	0	0	0	0	0	0	0	0	0	0	0	0	0	0	0	0	0	0	0	0	0	0
Fibrisoma	0	0	0	0	0	0	0.060365	0	0	0.0135484	0	0	0	0	0	0	0	0	0	0	0	0	0	0	0	0.0648372	0	0	0	0	0	0	0	0	0	0.163585	0	0	0	0	0	0	0	0	0	0	0	0	0
Fibrobacter	9.01912	10.2247	0	30.7667	0	18.4381	1.64294	0	0	16.3143	12.7204	0	0	18.8777	0	0	0	2.30855	0	0	34.6178	2.57559	1.53923	1.67381	3.66339	0	5.47089	16.0222	7.32043	9.41515	0	0	0	0	0	0	3.7093	0	0	0	0	61.8155	0	0.673314	0	0	2.24204	0	0
Fibrobacteres_norank	0	0	0	0	0	0	0	0	0	0	0.0114308	0	0	0.31085	0	0	0	0	0	0	0	0	0	0	0	0	0	0.0207954	0	0	0	0	0	0	0	0	0	0	0	0	0	0	0	0	0	0	0	0	0
Fictibacillus	0.0862851	0.0586458	0	0	0	0	0	0	0	0	0	0	0	0	0	0	0	0	0	0	0	0	0	0	0	0	0	0	0.0383539	0	0	0	0	0	0	0	0	0	0	0	0	0	0	0	0	0	0	0	0
Filimonas	0.103144	0	0	0	0	0	0	0	0	0	0	0	0	0	0	0	0	0	0	0	0	0	0	0	0	0	0	0	0	0.0524684	0	0	0	0	0.0524647	0.0212814	0	0.119243	0	0	0	0	0	0	0	0	0	0	0
Fimbriiglobus	0	0	0	0	0	0	0	0	0	0	0	0	0	0	0	0	0	0	0	0	0	0	0.0666833	0	0	0	0	0	0	0	0	0	0	0	0	0	0	0	0	0	0	0	0	0	0	0	0	0	0
Fimbriimonas	0	0	0	0	0	0	0	0	0	0	0	0	0	0	0	0	0	0	0	0	0	0	0	0	0	0	0	0	0.390358	0	0	0	0	0	0	0	0	0	0	0	0	0	0	0	0	0	0	0	0
Finegoldia	0	0	0	0	0	0	0	0	0	0	0	0	0	0	0	0	0	0	0	0	0	0	0	0	0	0	0	0	0	0	0	0	0	0	0	0	0	0	0	0	0	0	0	0	0	0	0	0	0
Firmicutes_norank	61.2997	5.39201	0	10.1782	0	4.21319	22.0042	11.0285	0.107341	0.557956	1.27936	0	1.46697	0	0.0541507	3.47351	0	17.9357	27.8043	3.49802	32.0641	0	2.97809	0	17.3238	14.9703	2.01672	2.58428	73.1906	4.19648	8.65371	0	0	2.86374	1.56381	25.1921	8.08191	43.1235	0.0541507	0.116342	0	0.0226678	0	0	0	1.46445	0.850471	0.00727238	0.811618
Flagellimonas	0	0	0	0	0	0	0	0	0	0	0	0	0	0	0	0	0	0	0	0	0	0	0	0	0	0	0	0.0719881	0	0	0	0	0	0	0	0.0262883	0	0	0	0	0	0	0	0	0	0	0	0	0
Flammeovirga	0	0	0	3.32167	0	0	0	0	0	0	0.0541737	0	0	0	0	0	0	0	0.0568697	0	0.0185261	0	0.270973	0	0	0	0	0.0237651	0.0467551	0	0	0	0	0	0.0167263	0.00842325	0	0	0	0.0280067	0	0	0	0	0	0	0.242697	0	0
Flammeovirgaceae_norank	0	0	0	0.0429098	0	0	0	0	0	0.0196105	0	0	0	0	0	0	0	0	0	0	0	0	0	0	0	0	0	0	0	0	0	0	0	0	0	0	0	0	0	0	0	0	0	0	0	0	0.0205933	0	0
Flaviaesturariibacter	0	0	0	0	0	0	0	0	0	0	0	0	0	0	0	0	0	0	0	0	0	0	0	0	0	0	0	0.0126129	0.0264891	0	0	0	0	0	0	0	0	0	0	0	0	0	0	0	0	0	0	0	0
Flavicella	0	0	0	0	0	0	0	0	0	0	0	0	0	0	0	0	0	0	0	0	0	0	0	0	0	0	0	0	0.126452	0	0	0	0	0	0	0	0	0	0	0	0	0	0	0	0	0	0	0	0
Flavihumibacter	0.0156438	0.0155371	0	0	0	0	0	0	0	0	0	0	0	0	0	0	0	0	0	0	0	0	0	0	0	0	0	0.0359255	0	0	0	0	0	0	0	0	0	0.214947	0	0	0	0	0	0	0	0.0185317	0	0	0
Flaviramulus	0	0	0	0	0	0	0	0	0	0	0	0	0	0	0	0	0	0	0	0	0	0	0	0	0	0	0	0	0	0	0	0	0	0	0	0	0	0	0	0	0	0	0	0	0	0	0	0	0
Flavisolibacter	0.428836	0	0	0	0	0	0	0	0	0.054198	0	0	0	0	0	0	0	0	0	0	0.0297216	0	0	0	0	0	0.0472672	0	0	0	0.0608023	0	0	0	0	0	0.0174286	0.0944081	0	0	0	0	0	0	0	0	0.0109734	0	0.220595
Flavivirga	0	0	0	0	0	0	0	0	0	0	0	0	0	0	0	0	0	0	0	0	0	0	0	0	0	0	0.0417272	0	0	0	0	0	0	0	0	0	0	0	0	0	0	0	0	0	0	0	0	0	0
Flavobacteriaceae_norank	0.296872	0	0	0	0	0	0	0	0	0.0506855	0	0	0	0	0	0	0	0	0.113243	0.0448883	0.0221356	0	0	0	0	0	0.0862089	0.334015	0	0.0236796	0	0	0	0	0.00727287	0.0553145	0.0219863	0.0119771	0	0	0	0	0	0	0	0	0.0724655	0	0
Flavobacteriales_norank	0.170268	0.0410449	0	0.0331126	0	0.0820476	0	0	0	0	0	0	0	0	0	0	0	1.0884	0	0	0	0	0	0	0	0	0	1.90809	0.211428	0	0.0955779	0	0	0	0	0	0	0	0	0	0	0	0	0	0	0	0	0	0
Flavobacteriia_norank	0.0605564	0	0	0	0	0	0	0	0	0	0	0	0	0	0	0	0	0	0.0212673	0	0	0	0	0	0	0	0	0.08183	0	0	0	0	0	0	0	0	0.0784876	0	0	0	0	0	0	0	0	0	0	0	0
Flavobacterium	4.15698	0.418766	0	0.0943371	0	2.10573	0	0	0	0.00891331	0	0.0524659	0	0	0	0	0	0.390435	0.794526	0.52518	1.52303	0	0	0	0	0	0	1.15219	0.805554	0	0.0279667	0	0	0	0.313931	2.2756	0.145145	0.125857	0	0	0	0	0	0	0	0.449481	1.30574	0	0
Flavonifractor	2.95818	0	0	0	0	0	0	0	0	0	0	0	0	0	0.100181	0	0	0	0	0	0.0187583	0	0	0	0	0	0.0748781	0.283793	10.9029	0	0	0	0	0	0	3.63572	0	0.189888	0.100181	0	0	0	0	0	0	0	0.215173	0	0
Flectobacillus	0	0	0	0	0	0	0	0	0	0	0	0	0	0	0	0	0	0	0	0	0	0	0	0	0	0	0	0	0	0	0	0	0	0	0	0	0	0	0	0	0	0	0	0	0	0	0	0	0
Flexilinea	0	0	0	0	0	0	0	0	0	0	0	0	0	0	0	0	0	0	0	0	0	0	0.684471	0	0	2.00649	0	0	0	0	0	0	0	0	0	0	0	0	0	0	0	0	0	0	0	0	0.0162309	0	0
Flexistipes	0.268921	0	0	0	0	0	0	0	0	0	0	0	0	0	0	0	0	0	0	0	0	0	0	0	0	0	0	0	0	0	0	0	0	0	0	0	0	0	0	0	0	0	0	0	0	0	0	0	0
Flexithrix	0	0	0	0	0	0	0	0	0	0	0	0	0	0	0	0	0	0	0	0	0.0339914	0	0	0	0	0	0	0	0.176684	0	0	0	0	0	0	0	0	0	0	0	0	0	0	0	0	0	0	0	0
Flintibacter	0	0	0	0	0	0	0	0	0.0348196	0	0	0	0	0	0	0	0	0	0.108587	0	0	0	0.0714146	0	0	0	0	0	0	0	0	0	0	0	0	0	0	0	0	0	0	0	0	0	0	0	0	0	0
Floricoccus	0	0	0	0	0	0	0	0	0	0	0	0	0	0	0	0	0	0	0	0	0	0	0	0	0	0	0	0	0	0	0	0	0	0	0	0	0	0	0	0	0	0	0	0	0	0	0	0	0
Fluviicola	0	0	0	0	0	0	0	0	0	0	0	0	0	0	0	0	0	0	0	0	0	0	0	0	0	0	0	0.163523	0	0	0	0	0	0	0	0	0	0	0	0	0	0	0	0	0	0	0	0	0
Fontibacillus	0.0717896	0	0	0	0	0	0	0	0	0	0	0	0	0	0	0	0	0	0	0	0	0	0	0	0	0	0	0	0.470447	0	0	0	0	0	0	0.0438615	0	0	0	0	0	0	0	0	0	0	0	0	0
Fonticella	0	0	0	0	0	0	0	0	0	0	0	0	0	0	0	0	0	0	0	0	0	0	0	0	0	0	0	0	0	0	0	0	0	0	0	0	0	0	0	0	0	0	0	0	0	0	0	0	0.0917796
Formicidae	0	0	0	0	0	0	0	0	0	0	0	0	0	0	0	0	0	0	0.248779	0	0	0	0	0	0	0	0	0	0	0	0	0	0	0	0	0	0	0	0	0	0	0	0	0	0	0	0	0	0
Formosa	0	0	0	0	0	0	0	0	0	0	0	0	0	0	0	0	0	0	0	0	0	0	0	0	0	0	0.0123555	0.0162008	0	0	0	0	0	0	0	0.0136251	0	0	0	0	0	0	0	0	0	0	0	0	0
Fournierella	0.182034	0	0	0.0199471	0	0	0	0	0	0	0	0	0	0	0	0	0	0	0	0	0.0875608	0	0	0	0	0	0	0	0	0	0	0	0	0	0	0	0	0	0	0	0	0	0	0	0	0	0	0	0
Francisella	0	0	0	0	0	0	0	0	0	0	0	0	0	0	0	0	0	0	0	0	0	0	0	0	0	0	0	0	0	0	0	0	0	0	0	0	0	0	0	0	0	0	0	0	0	0	0	0	0
Frankia	0	0.0146229	0	0	0	0	0	0	0	0	0	0	0	0	0	0	0	0	0	0	0	0	0	0	0	0	0	0	0	0	0	0	0	0	0	0	0	2.03846	0	0	0	0	0	0	0	0	0	0	0
Fretibacterium	0	0	0	0	0	0	0	0	0	0	0	0	0	0	0	0	0	0	0	0	0	0	0	0	0	0	0	0	0	0	0	0	0	0	0	0	0	0	0	0	0	0	0	0	0	0	0	0	0
Frisingicoccus	0	0	0	0	0	0	0	0	0	0.149291	0	0	0	0	0	0	0	0	0	0	0	0	0	0	0	0	0	0	0	0	0	0	0	0	0.115685	0	0	0	0	0	0	0	0	0	0	0	0	0	0
Frondihabitans	0	0	0	0	0	0	0	0	0	0	0	0	0	0	0	0	0	0	0	0	0.0974251	0	0	0	0	0	0	0	0	0	0	0	0	0	0	0	0	0	0	0	0	0	0	0	0	0	0	0	0
Fulvimonas	0	0	0	0	0	0	0	0	0	0	0	0	0	0	0	0	0	0	0	0	0	0	0	0	0	0	0	0	0	0	0	0	0	0	0	0	0	0	0	0	0	0	0	0	0	0	0	0	0
Fulvivirga	0	0	0	4.31878	0	0	0	0	0	0	0	0	0	0	0	0	0	0	0	0	0	0	0	0	0	0	0	0.0439994	0	0	0	0	0	0	0	0	0	0	0	0	0	0	0	0	0	0	0	0	0
Funariaceae	0	0	0	0	0	0	0	0	0	0	0	0	0	0	0	0	0	0	0	0	0	0	0	0	0	0	0	0	0	0	0	0	0	0	0	0	0	0	0	0	0	0	0	0	0	0	0	0	0
Fusibacter	0	0	0	0.354718	0	0	0	0	0	0	0	0	0	0	0	0	0	0	0.238341	0	0	0	0	0	0	0	0	0.0200429	0.540257	0	0	0	0	0	0.874446	0.0144998	0	0	0	0	0	0	0	0	0	0	0	0	0
Fusicatenibacter	1.97963	0.0246499	0	0.232419	0	0	1.09628	0.356639	0	0	0	0	0	0	0	0.285372	0	0	0.519589	0.583173	1.63604	0	0.211393	0	0	0.207798	0	0	0.0722674	0.0198294	0.0108581	0	0	0	0.287912	0	0	0.280219	0	0	0	0	0	0	0	0	0.0290031	0	0
Fusobacteriia_norank	0	0	0	0	0	0	0	0	0	0	0	0	0	0	0	0	0	0	0.377134	0	0	0	0	0	0	0	0	0	0	0	0	0	0	0	0	0	0	0	0	0	0	0	0	0	0	0	0	0	0
Fusobacterium	0.0218714	0	0	0	0	0	0	0	0	0	0	0	0	0	0	0	0	0	0	0	0	0	0	0	0	0	0	0	0.209967	0	0	0	0	0	0	0	0	0	0	0	0	0	0	0	0	0	0	0	0
Gabonia	0	0	0	0	0	0	0	0	0	0	0	0	0	0	0	0	0	0	0	0	0.0180804	0	0	0	0	0.0186837	0	0	0.76983	0	0	0	0	0	0.0479609	0	0	0	0	0	0	0	0	0	0	0	0	0	0
Gabonibacter	0	0	0	0	0	0	0	0	0	0	0	0	0	0	0	0	0	0	0	0	0	0	0	0	0	0	0	0	0	0	0	0	0	0	0	0	0	0	0	0	0	0	0	0	0	0	0	0	0
Gaetbulibacter	0	0	0	0	0	0	0	0	0	0	0	0	0	0	0	0	0	0	0	0	0	0	0	0	0	0	0	0	0	0	0	0	0	0	0	0	0	0	0	0	0	0	0	0	0	0	0	0	0
Galactobacillus	0	0	0	0	0	0	0	0.415911	0	0	0	0	0	0	0	0	0	0	0	0	0	0	0	0	0	0	0	0	0.549493	0	0	0	0	0	0	0	0	0	0	0	0	0	0	0	0	0	0	0	0
Galactobacter	0	0	0	0	0	0	0	0	0	0	0	0	0	0	0	0	0	0	0	0	0	0	0	0	0	0	0	0.0247616	0	0	0	0	0	0	0	0	0	0	0	0	0	0	0	0	0	0	0	0	0
Gallibacterium	0	0	0	0	0	0	0	0	0	0	0	0	0	0	0	0	0	0	0	0	0	0	0	0	0	0	0	0	0.0363766	0	0	0	0	0	0	0	0	0	0	0	0	0	0	0	0	0	0	0	0
Gammaproteobacteria_norank	0.454921	0	0	0	0	0	0.0387276	0	0	0.124727	0	0	0	0	0	0	0	0	0	0	0.257088	0	0	0	0	0	0.0141639	0.242463	0	0	0	0	0	0	0	0	0	0	0	0	0	0	0	0	0	0	0	0	0
Garciella	0	0	0	0	0	0	0	0	0	0	0	0	0	0	0	0	0	0	0	0	0	0	0	0	0	0	0	0	0	0	0	0	0	0	0	0	0	0	0	0	0	0	0	0	0	0	0	0	0
Gardnerella	0	0	0	0	0	0	0	0	0	0	0	0	0	0	0	0	0	0	0	0	0	0	0	0	0	0	0	0	0	0	0	0	0	0	0	0	0	0	0	0	0	0	0	0	0	0	0	0	0
Gekkonidae	0	0	0	0	0	0	0	0	0	0	0	0	0	0	0	0	0	0	0.0714333	0	0	0	0	0	0	0	0	0	0	0	0	0	0	0	0	0	0	0	0	0	0	0	0	0	0	0	0	0	0
Gelidibacter	0.0211986	0	0	0	0	0	0	0	0	0	0	0	0	0	0	0	0	0	0.0546213	0	0.0275599	0	0	0	0	0	0	0	0	0	0	0	0	0	0	0	0	0	0	0	0	0	0	0	0	0	0	0	0
Gemella	0	0	0	0	0	0	0	0	0	0	0	0	0	0	0	0	0	0	0	0	0	0	0	0	0	0	0	0	0	0	0	0	0	0	0	0	0	0	0	0	0	0	0	0	0	0	0	0	0
Geminisphaera	0	0	0	0	0	0	0	0	0	0	0	0	0	0	0	0	0	0	0	0	0	0	0	0	0	0	0	0	0.0341996	0.512794	0.0552522	0	0	0	0	0.168569	0	0	0	0	0	0	0	0	0	0	0	0	0
Gemmata	0	0	0	0	0	0	0	0	0	0	0	0	0	0	0	0	0	0	0	0	0	0	0	0	0	0	0	0	0	0	0	0	0	0	0	0	0	0	0	0	0	0	0	0	0	0	0	0	0
Gemmataceae_norank	0	0	0	0	0	0	0	0	0	0	0	0	0	0	0	0	0	0	0	0	0	0	0.0548192	0	0	0.0701497	0	0	0	0.0680424	0	0	0	0	0	0	0	0	0	0	0	0	0	0.0197491	0	0	0	0	0
Gemmatimonadaceae_norank	0	0	0	0	0	0	0	0	0	0	0	0	0	0	0	0	0	0	0	0	0	0	0	0	0	0	0	0	0	0	0	0	0	0	0	0	0	0	0	0	0	0	0	0	0	0	0	0	0
Gemmatimonadales_norank	0.0128091	0	0	0	0	0	0.0237724	0	0	0	0	0	0	0	0	0	0	0	0	0	0	0	0	0	0	0	0	0	0	0	0	0	0	0	0	0	0	0	0	0	0	0	0	0	0	0	0.0189749	0	0
Gemmatimonadetes_norank	0	0	0	0.1705	0	0	0	0	0	0	0	0	0	0	0	0	0	0	0	0	0.0275404	0	0	0	0.0782944	0	0	0	0.440579	0	0	0	0	0.0712701	0	0	0	0.0587175	0	0	0	0	0	0	0	0	0.0616016	0	0
Gemmatimonas	0.0285566	0	0	0	0	0	0	0	0	0	0	0	0	0	0	0	0	0	0	0	0	0	0	0	0	0	0	0	0	0	0	0	0	0	0	0	0	0	0	0	0	0	0	0	0	0	0	0	0
Gemmatirosa	0	0	0	0	0	0	0	0	0	0	0	0	0	0	0	0	0	0	0	0	0	0	0	0	0	0	0	0	0	0	0	0	0	0	0	0	0	0	0	0	0	0	0	0	0	0	0	0	0
Gemmiger	28.339	0	0	0.0494926	0	0	0.0272897	1.05136	0	0	0	0	0	0	0	0.0221014	0	0	0.62159	0	0.102259	0	0	0	0	0	0	7.45401	17.7083	0.0171214	0	0	0	0	0	0.0371976	0	0.15843	0	0	0	0	0	0	0	0	0	0	0
Geobacillus	0.0360931	0	0	0	0	0	0	0	0	0	0	0	0.00587363	0	0	0	0	0.0327433	0	0	0.0408999	0	0	0	0	0.0862689	0	0	0.515221	0	0	0	0	0	0	0	0	0	0	0	0	0	0	0	0	0	0	0	0
Geodermatophilus	0	0	0	0	0	0	0	0	0	0	0	0	0	0	0	0	0	0	0	0	0	0	0	0	0	0	0	0	0	0	0	0	0	0	0	0	0	0	0	0	0	0	0	0	0	0	0	0	0
Geofilum	1.83296	0	0	0.029158	0	0	0	0	0	0	0	0	0	0	0	0	0	0	0	0	0.0133589	0	0	0	0	0	0	0	0.0384782	0.0434646	0	0	0	0	0	0	0	0	0	0	0	0	0	0	0	0	0	0	0
Geometridae	0	0	0	0	0	0	0	0	0	0	0	0	0	0	0	0	0	0	0	0	0	0	0	0	0	0	0	0	0	0	0	0	0	0	0	0	0	0	0	0	0	0	0	0	0	0	0	0	0
Geomonas' Khan et al. 2020	0	0	0	0	0	0	0	0	0	0	0	0	0	0	0	0	0	0	0	0	0	0	0	0	0	0	0	0	0	0	0	0	0	0	0	0	0	0	0	0	0	0	0	0	0	0	0	0	0
Georgenia	0	0	0	0	0	0	0	0	0	0	0	0	0	0	0	0	0	0	0	0	0	0	0	0	0	0	0	0	0	0	0	0	0	0	0	0	0	0	0	0	0	0	0	0	0	0	0	0	0
Geosporobacter	0	0	0	0.0334997	0	0	0	0	0	0	0	0	0	0	0	0	0	0	0	0	0	0	0	0	0	0	0	0	0	0	0	0	0	0	0	0	0	0	0	0	0	0	0	0	0	0	0	0	0
Geothermobacter	0	0	0	0	0	0	0	0	0	0	0	0	0	0	0	0	0	0	0	0	0	0	0	0	0	0	0	0	0	0	0	0	0	0	0	0	0	0	0	0	0	0	0	0	0	0	0	0	0
Geovibrio	0	0	0	0	0	0	0	0	0	0	0	0	0	0	0	0	0	0	0	0	0	0	0	0	0	0	0	0	0	0	0	0	0	0	0	0	0	0	0	0	0	0	0	0	0	0	0	0	0
Gibbsiella	0	0	0	0	0	0	0	0	0	0	0	0	0	0	0	0	0	0	0	0	0	0	0	0	0	0	0	0	0	0	0	0	0	0	0	0	0	0.0482769	0	0	0	0	0	0	0	0	0	0	0
Gilliamella	0	0	0	0	0	0	0	0	0	0	0	0	0	0	0	0	0	0	0	0	0	0	0	0	0	0	0	0	0	0	0	0	0	0	0.0306302	0	0	0	0	0	0	0	0	0	0	0	0	0	0
Gillisia	0	0	0	0	0	0	0	0	0	0	0	0	0	0	0	0	0	0	0	0	0	0	0	0	0	0	0	0.31728	0	0	0	0	0	0	0	0	0	0	0	0	0	0	0	0	0	0	0	0	0
Gilvimarinus	0	0	0	0	0	0	0	0	0	0	0	0	0	0	0	0	0	0	0	0	0	0	0	0	0	0	0.158535	0	0	0	0	0	0	0	0	0	0	0	0	0	0	0	0	0	0	0	0	0	0
Gimesia	0	0	0	0	0	0	0	0	0	0	0	0	0	0	0	0	0	0	0	0	0	0	0	0	0	0	0.158578	0	0	0	0	0	0	0	0	0.0798595	0	0	0	0	0	0	0	0	0	0	0	0	0
Glaciihabitans	0	0	0	0	0	0	0	0	0	0	0	0	0	0	0	0	0	0	0	0	0	0	0	0	0	0	0	0	0	0	0	0	0	0	0	0	0	0	0	0	0	0	0	0	0	0	0	0	0
Glaesserella	0	0	0	0	0	0	0	0	0	0	0	0	0	0	0	0	0	0	0	0	0	0	0	0	0	0	0	0	0.0754397	0	0	0	0	0	0	0	0	0	0	0	0	0	0	0	0	0	0	0	0
Globicatella	0.0130931	0	0	0	0	0	0	0	0	0	0	0	0	0	0	0	0	0	0.0278277	0	0.0709572	0	0	0	0	0	0	0	0	0	0	0	0	0	0	0	0	0	0	0	0	0	0	0	0	0	0	0	0
Globisporangium	0	0	0	0	0	0	0	0	0	0	0	0	0	0	0	0	0	0	0.0357058	0	0	0	0	0	0	0	0	0	0	0	0	0	0	0	0	0	0	0	0	0	0	0	0	0	0	0	0	0	0
Gloeothece	0	0	0	0	0	0	0	0	0	0.0383694	0	0	0	0	0	0	0	0	0	0	0	0	0	0	0	0	0	0	0	0	0	0	0	0	0	0	0	0	0	0	0	0	0	0	0	0	0	0	0
Glomeraceae	0	0	0	0	0	0	0	0	0	0	0	0	0	0	0	0	0	0	0.0405719	0	0	0	0	0	0	0	0	0	0	0	0	0	0	0	0	0	0	0	0	0	0	0	0	0	0	0	0	0	0
Glomerellaceae	0	0	0	0	0	0	0	0	0	0	0	0	0	0	0	0	0	0	0.0137761	0.0281174	0	0	0	0	0	0	0	0	0	0	0	0	0	0	0	0	0	0	0	0	0	0	0	0	0	0	0	0	0
Glossiphoniidae	0	0	0	0	0	0	0	0	0	0	0	0	0	0	0	0	0	0	0	0	0	0	0	0	0	0	0	0	0	0	0	0	0	0	0	0	0	0	0	0	0	0	0	0	0	0	0	0	0
Glycomyces	0	0	0	0	0	0	0	0	0	0	0	0	0	0	0	0	0	0	0	0	0.57426	0	0	0	0	0	0	0	0	0	0.0126947	0	0	0	0	0	0	0	0	0	0	0	0	0	0	0	0	0	0
Gordonia	0	0	0	0	0	0	0	0	0	0	0	0	0	0	0	0	0	0	0	0	0	0	0	0	0	0	0	0	0	0.0482781	0	0	0	0	0	0	0	0	0	0	0	0	0	0	0	0	0	0	0
Gordonibacter	0	0	0	0	0	0	0	0	0	0	0	0	0	0	0	0	0	0	0	0	0	0	0	0	0	0	0	0	0	0	0	0	0	0	0	0	0	0	0	0	0	0	0	0	0	0	0	0	0
Gorillibacterium	0.404628	0.189494	0	0.375706	0	0	0.144411	0	0	0.052005	0	0	0.0540262	0	0	0	0	0.785555	0.130069	0	0.0806192	0	0	0	0	0	0	2.23341	1.14267	0	0.0510796	0	0	0	0	0.129643	0	0	0	0.0294129	0	0	0	0	0	0	0.385993	0	0
Gottschalkia	0	0	0	0	0	0	0	0	0	0	0	0	0	0	0	0	0	0	0	0	0	0	0	0	0	0	0	0	0	0	0	0	0	0	0	0	0	0	0	0	0	0	0	0	0	0	0	0	0
Gottschalkiaceae_norank	0	0	0	0	0	0	0	0	0	0	0	0	0	0	0	0	0	0	0	0	0	0	0	0	0	0	0	0	0	0	0	0	0	0	0	0	0	0	0	0	0	0	0	0	0	0	0	0	0
Gracilaria	0	0	0	0	0	0	0	0	0	0	0	0	0	0	0	0	0	0	0	0	0	0	0	0	0	0	0	0	0	0	0	0	0	0	0	0	0	0	0	0	0	0	0	0	0	0	0	0	0
Gracilariopsis	0	0	0	0	0	0	0	0	0	0	0	0	0	0	0	0	0	0	0	0	0	0	0	0	0	0	0	0	0	0	0	0	0	0	0	0	0	0	0	0	0	0	0	0	0	0	0	0	0
Gracilibacillus	0	0	0	1.58042	0	0	0	0.0177013	0	0.0633516	0	0	0	0	0	0	0	0.172064	0.196942	0.0190985	0.349958	0	0	0	0	0	0	0.0524861	0.325148	0	0.405972	0	0	0	0.500617	0	0.803311	1.60801	0	0	0	0	0	0	0	0	0	0	0
Gracilibacter	0	0	0	0	0	0	0	0	0	0	0	0	0	0	0	0	0	0	0	0	0	0	0	0	0	0	0	0	0	0	0	0	0	0	0	0	0	0	0	0	0	0	0	0	0	0	0	0	0
Gracilimonas	0	0	0	0	0	0	0	0	0	0	0	0	0	0	0	0	0	0	0	0	0.0809584	0	0	0	0	0	0	0.724126	0	0	0	0	0	0	0	0	0	0	0	0	0	0	0	0	0	0	0	0	0
Gramella	0	0	0	0	0	0	0	0	0	0	0	0	0	0	0	0	0	0	0.0168599	0.0231449	0.0152971	0	0	0	0	0	0	0.533041	0	0	0	0	0	0	0	0	0	0	0	0	0	0	0	0	0	0	0	0	0
Granulicatella	0.0290418	0	0	0	0	0	0	0	0	0	0	0	0	0	0	0	0	0	0	0	0	0	0	0	0	0	0	0	0	0	0	0	0	0	0	0	0	0	0	0	0	0	0	0	0	0	0	0	0
Granulicella	0.0162004	0	0	0	0	0	0	0	0	0	0	0	0	0	0	0	0	0	0	0	0.0269601	0	0	0	0	0	0.0181466	0	0	0	0	0	0	0	0	0.0571598	0	0.210423	0	0	0	0	0	0.021088	0	0	0	0	0
Guillardia	0	0	0	0	0	0	0	0	0	0	0	0	0	0	0	0	0	0	0	0	0	0	0	0	0	0	0	0	0	0	0	0	0	0	0	0	0	0	0	0	0	0	0	0	0	0	0	0	0
Gymnotidae	0	0	0	0	0	0	0	0	0	0	0	0	0	0	0	0	0	0	0	0	0	0	0	0	0	0	0	0	0	0	0	0	0	0	0	0	0	0	0	0	0	0	0	0	0	0	0	0	0
Gynuella	0	0	0	0	0	0	0	0	0	0	0	0	0	0	0	0	0	0	0	0	0.0148237	0	0	0	0	0	0	0	0	0	0	0	0	0	0	0	0	0	0	0	0	0	0	0	0	0	0	0	0
Gynurincola	0	0	0	0	0	0	0	0	0	0	0	0	0	0	0	0	0	0	0	0	0.237901	0	0	0	0	0	0	0	0	0	0	0	0	0	0	0	0	0	0	0	0	0	0	0	0	0	0	0	0
Haematospirillum	0	0	0	0	0	0	0	0	0	0	0	0	0	0	0	0	0	0	0	0	0	0	0	0	0	0	0	0	0	0	0	0	0	0	0	0	0	0	0	0	0	0	0	0	0	0	0	0	0
Haemophilus	0	0	0	0	0	0	0	0	0	0	0	0	0	0	0	0	0	0	0	0	0	0	0	0	0	0	0	0	0.0412884	0	0	0	0	0	0	0	0	0	0	0	0	0	0	0	0	0	0	0	0
Hahella	0	0	0	0	0	0	0	0	0	0	0	0	0	0	0	0	0	0	0	0	0	0	0	0	0	0	0	0	0	0	0	0	0	0	0	0	0	0	0	0	0	0	0	0	0	0	0	0	0
Haladaptatus	0.0729242	0	0	0	0	0	0	0	0	0	0	0	0	0	0	0	0	0	0	0	0	0	0	0	0	0	0	0	0.0401955	0	0	0	0	0	0	0	0	0	0	0	0	0	0	0	0	0	0	0	0
Halanaerobium	0.401506	0	0	0	0	0	0	0	0	0.0265648	0	0	0	0	0	0	0	0	0.0388288	0	0.0847627	0	0.126323	0	0	0	0	0	0.0261647	0	1.18629	0	0	0	0	0.106461	0	0.293509	0	0	0	0	0	0	0	0	0	0	0
Halarsenatibacter	0	0	0	0	0	0	0	0	0	0	0	0	0	0	0	0	0	0	0	0	0	0	0	0	0	0	0	0	0	0	0	0	0	0	0	0	0	0	0	0	0	0	0	0	0	0	0	0	0
Halegenticoccus	0	0	0	0.0373179	0	0	0	0	0	0	0	0	0	0	0	0	0	0	0	0	0	0	0	0	0	0	0	0	0	0	0	0	0	0	0	0	0	0	0	0	0	0	0	0	0	0	0	0	0
Halieaceae_norank	0	0	0	0	0	0	0	0	0	0	0	0	0	0	0	0	0	0	0	0	0	0	0	0	0	0	0	0.0844289	0	0	0	0	0	0	0	0	0	0	0	0	0	0	0	0	0	0	0	0	0
Haliotidae	0	0	0	0	0	0	0	0	0	0	0	0	0	0	0	0	0	0	0.199303	0	0	0	0	0	0	0	0	0	0	0	0	0	0	0	0	0	0	0	0	0	0	0	0	0	0	0	0	0	0
Haliscomenobacter	0	0	0	0	0	0	0	0	0	0.0219486	0	0	0	0	0	0	0	0	0	0	0.0168232	0	0	0	0	0	0	0	0.0243258	0	0	0	0	0	0	0	0	0.0693981	0	0	0	0	0	0	0	0	0	0	0
Haloactinobacterium	0	0	0	0	0	0	0	0	0	0	0	0	0	0	0	0	0	0	0	0	0	0	0.130447	0	0	0	0	0	0	0	0	0	0	0	0.274164	0	0	0.0127113	0	0	0	0	0	0	0	0	0	0	0
Haloarcula	0.0355217	0	0	0	0	0	0	0	0	0	0	0	0	0	0	0	0	0	0	0	0	0	0	0	0	0	0	0	0	0	0	0	0	0	0	0	0	0	0	0	0	0	0	0	0	0	0	0	0
Haloarculaceae_norank	0	0	0	0	0	0	0	0	0	0	0	0	0	0	0	0	0	0	0	0	0	0	0	0	0	0	0	0	0	0	0	0	0	0	0	0	0	0	0	0	0	0	0	0	0	0	0	0	0
Halobacillus	0	0	0	0	0	0	0	0	0.0172156	0	0	0	0	0	0	0	0	0	0	0.109808	0	0	0.333666	0	0	0	0	0	0	0	0.0391499	0	0	0	0.070576	0	0	0	0	0	0	0	0	0	0	0	0	0	0
Halobacteriales_norank	0	0	0	0.0400589	0	0	0	0	0	0	0	0	0	0	0	0	0	0	0	0	0	0	0	0	0	0	0	0	0	0	0	0	0	0	0	0	0	0	0	0	0	0	0	0	0	0	0	0	0
Halobacteroides	0	0	0	0.0329724	0	0	0	0	0	0	0	0	0	0	0	0	0	0	0	0	0	0	0.0251996	0	0	0.0668879	0	0	0	0	0	0	0	0	0	0	0	0	0	0	0	0	0	0	0	0	0	0	0
Halocella	0	0	0	0	0	0	0.172206	0	0	0	0	0	0	0	0	0	0	0	0.0411489	0	0	0	0	0	0	0	0	0	0	0	0	0	0	0	0	0	0	0	0	0	0	0	0	0	0	0	0	0	0
Haloferacaceae_norank	0.0110221	0	0	0	0	0	0	0	0	0	0	0	0	0	0	0	0	0	0	0	0	0	0	0	0	0	0	0	0	0	0	0	0	0	0	0	0	0	0	0	0	0	0	0	0	0	0	0	0
Haloferax	0	0	0	0	0	0	0	0	0	0	0	0	0	0	0	0	0	0	0	0	0	0	0	0	0	0	0	0	0	0	0	0	0	0	0	0	0	0	0	0	0	0	0	0	0	0	0	0	0
Haloferula	0	0	0	0	0	0	0	0	0	0	0	0	0	0	0	0	0	0	0	0	0.37814	0	0	0	0	0	0	0.0433212	0	0	0	0	0	0	0	0.0383332	0	0.0524972	0	0	0	0	0	0	0	0	0	0	0
Halogeometricum	0	0	0	0	0	0	0	0	0	0	0	0	0	0	0	0	0	0	0	0	0	0	0	0	0	0	0	0	0.0252188	0	0	0	0	0	0	0	0	0	0	0	0	0	0	0	0	0	0	0	0
Haloimpatiens	0	0	0	0	0	0	0	0	0	0	0	0	0	0	0	0	0	0	0	0	0	0	0	0	0.0328772	0	0	0	0	0	0	0	0	0	0	0	0	0	0	0	0	0	0	0	0	0	0	0	0
Halolactibacillus	0	0.0306662	0	0	0	0	0	0.0290475	0	0	0	0	0	0	0	0	0	0	0	0	0.0292733	0	0	0	0	0	0	0	0	0	0	0	0	0	0	0	0	0	0	0	0	0	0	0	0	0	0	0	0.0134451
Halomonas	0.00962994	0	0	0	0	0	0	0	0	0	0	0	0	0	0	0	0	0	0	0	0	0	0	0	0	0	0	0	0	0	0	0	0	0	0	0	0	0	0	0	0	0	0	0	0	0	0	0	0
Halonatronum	0	0	0	0	0	0	0	0	0	0	0	0	0	0	0	0	0	0	0	0	0	0	0	0	0	0	0	0	0	0	0	0	0	0	0	0	0	0	0	0	0	0	0	0	0	0	0	0	0
Halopelagius	0	0	0	0	0	0	0	0	0	0	0	0	0	0	0	0	0	0	0	0	0	0	0	0	0	0	0	0	0.0663753	0	0	0	0	0	0	0	0	0	0	0	0	0	0	0	0	0	0	0	0
Haloplasma	0.0642656	0	0	0.0666919	0	0	0	0	0	0	0	0	0	0	0	0	0	0	0	0	0.0135126	0	0	0	0	0	0	0.0225004	0	0	0	0	0	0	0	0	0	0	0	0	0	0	0	0	0	0	0	0	0
Halorhabdus	0	0	0	0	0	0	0	0	0	0	0	0	0	0	0	0	0	0	0	0	0.0400484	0	0	0	0	0	0	0	0	0	0	0	0	0	0	0	0	0	0	0	0	0	0	0	0	0	0	0	0
Halorubrum	0	0	0	0.0541044	0	0	0	0	0	0	0	0	0	0	0	0	0	0	0.0846315	0	0	0	0	0	0	0	0	0	0	0	0	0	0	0	0	0	0	0	0	0	0	0	0	0	0	0	0	0	0
Halosimplex	0	0	0	0.347499	0	0	0	0	0	0	0	0	0	0	0	0	0	0	0	0	0	0	0	0	0	0	0	0	0.0114268	0	0	0	0	0	0	0	0	0	0	0	0	0	0	0	0	0	0	0	0
Haloterrigena	0	0	0	0	0	0	0	0	0	0	0	0	0	0	0	0	0	0	0	0	0	0	0	0	0	0.0189354	0	0	0	0	0	0	0	0	0	0	0	0	0	0	0	0	0	0	0	0	0	0	0
Halothermothrix	0	0.092037	0	0	0	0	0	0.0216273	0	0	0	0	0	0	0	0	0	0	0	0	0	0	0	0	0	0	0	0.325389	0	0	0	0	0	0	0	0	0	0	0	0	0	0	0	0	0	0	0	0	0
Halteria	0	0	0	1.96059	0	0	0	0	0	0	0	0	0	0	0	0	0	0	0	0	0	0	0	0	0	0	0	0	0	0	0	0	0	0	0	0	0	0	0	0	0	0	0	0	0	0	0	0	0
Harryflintia	0	0	0	0	0	0	0.0736926	0	0	0	0	0	0	0	0	0	0	0	0	0	0	0	0	0	0	0	0	0	0.0944724	0	0	0	0	0	0	0	0	0	0	0	0	0	0	0	0	0	0	0	0
Helcococcus	0	0.0404893	0	0	0	0	0	0	0	0	0	0	0	0	0	0	0	0	0	0	0	0	0	0	0	0	0	0	0	0	0	0	0	0	0	0	0	0	0	0	0	0	0	0	0	0	0	0	0
Helicobacter	0	0	0	0	0	0	0	0	0	0	0	0	0	0	0	0	0	0	0	0	0.206285	0	0	0	0	0	0	0	0	0	0	0	0	0	0	0	0	0	0	0	0	0	0	0	0	0	0	0	0
Heliobacillus	0	0	0	0	0	0	0	0	0	0	0	0	0	0	0	0	0	0	0	0	0	0	0	0	0	0	0	0	0	0	0	0	0	0	0	0	0	0	0	0	0	0	0	0	0	0	0	0	0
Heliophilum	0	0	0	0	0	0.0865942	0	0	0	0	0	0	0	0	0	0	0	0	0	0	0	0	0	0	0	0	0	0	0	0.117697	0	0	0	0	0	0	0	0	0	0.144858	0	0	0	0	0	0	0	0	0
Heliorestis	0	0	0	0	0	0	0	0	0	0	0	0	0	0	0	0	0	0	0	0	0	0	0	0	0	0	0	0	0	0	0	0	0	0	0	0	0	0	0	0	0	0	0	0	0	0	0	0	0
Helotiales_norank	0	0	0	0	0	0	0	0	0	0	0	0	0	0	0	0	0	0	0.0211899	0	0	0	0	0	0	0	0	0	0	0	0	0	0	0.0430458	0	0	0	0	0	0	0	0	0	0	0	0	0	0	0
Hemiscylliidae	0	0	0	0	0	0	0	0	0	0	0	0	0	0	0	0	0	0	0.100437	0	0	0	0	0	0	0	0	0	0	0	0	0	0	0	0	0	0	0	0	0	0	0	0	0	0	0	0	0	0
Hephaestia	0	0	0	0	0	0	0	0	0	0	0	0	0	0	0	0	0	0	0	0	0	0	0	0	0	0	0	0	0	0	0	0	0	0	0	0	0	0	0	0	0	0	0	0	0	0	0	0	0
Herbaspirillum	0	0	0	0	0	0	0	0	0	0	0	0	0	0	0	0	0	0	0	0	0	0	0	0	0	0	0	0	0	0	0	0	0	0	0	0	0	0	0	0	0	0	0	0	0	0	0	0	0
Herbiconiux	0	0	0	0	0	0	0	0	0	0	0	0	0	0	0	0	0	0	0	0	0.0576219	0	0	0	0	0	0	0	0	0	0	0	0	0	0	0	0	0	0	0	0	0	0	0	0	0	0	0	0
Herbinix	4.5836	2.12487	0	3.29669	0	0	0.0605075	1.5432	0	4.76944	0.0436916	0.0213463	0.316217	0	0	0	0	0.10568	3.80249	0	11.0553	0	2.57565	0	0	0	0	0.0998369	0.59315	0	0	0	0	0	0	0	0	0	0	0	0	0	0	0	0	0	0	0	0
Herelleviridae_norank	0	0	0	0	0	0	0	0	0	0	0	0	0	0	0	0	0	0	0	0	0	0	0	0	0	0	0	0	0	0	0	0	0	0	0	0	0	0	0	0	0	0	0	0	0	0	0	0	0
Herminiimonas	0	0	0	0	0	0	0	0	0	0	0	0	0	0	0	0	0	0	0	0	0	0	0	0	0	0	0	0	0	0	0	0	0	0	0	0	0	0	0	0	0	0	0	0	0	0	0	0	0
Herpestidae	0	0	0	0	0	0	0	0	0	0	0	0	0	0	0	0	0	0	0.0492773	0	0	0	0	0	0	0	0	0	0	0	0	0	0	0	0	0	0	0	0	0	0	0	0	0	0	0	0	0	0
Herpetosiphon	0	0	0	0	0	0	0	0	0	0	0	0	0	0	0	0	0	0	0	0	0	0	0	0	0	0	0	0	0	0	0	0	0	0	0	0	0	0	0	0	0	0	0	0	0	0	0	0	0
Hespellia	0	0	0	0	0	0	0	0.188191	0	0	0	0	0	0	0	0	0	0	0.0677421	0	0	0	0	0	0	0	0	0	0.0668053	0	0	0	0	0	0	0	0	0	0	0	0	0	0	0	0	0	0.0209071	0	0
Heteromyidae	0	0	0	0	0	0	0	0	0	0	0	0	0	0	0	0	0	0	0.206845	0	0	0	0	0	0	0	0	0	0	0	0	0	0	0	0	0	0	0	0	0	0	0	0	0	0	0	0	0	0
Heterostelium	0	0	0	0	0	0	0	0	0	0	0	0	0	0	0	0	0	0	0	0	0	0	0	0	0	0	0	0	0	0	0	0	0	0	0	0	0	0	0	0	0	0	0	0	0	0	0	0	0
Holdemanella	0	0	0	0	0	0	0	0.108934	0	0	0	0	0	0	0	0	0	0	0	0	0	0	0	0	0	0	0	0	0	0	0	0	0	0	0	0	0	0	0	0	0	0	0	0	0	0	0	0	0
Holdemania	0.817925	0	0	0.644615	0	0.494597	0	0.716362	0	0	0	0	0	0	0	0	0	0	0	0	0.325464	0	0	0	0	0	0	0	0	0	0	0	0	0	0	0	0	0	0	0	0	0	0	0	0	0	0	0	0
Holophagae_norank	0	0	0	0	0	0	0	0	0	0	0	0	0	0	0	0	0	0	0	0	0	0	0	0	0	0	0	0	0.0942178	0	0	0	0	0	0.00795937	0	0	0	0	0	0	0	0	0	0	0	0	0	0
Holosporaceae_norank	0	0	0	0	0	0	0	0	0	0	0	0	0	0	0	0	0	0	0	0	0	0	0	0	0	0	0	0	0	0	0	0	0	0	0	0	0	0	0	0	0	0	0	0	0	0	0	0	0
Hominidae	0	0	0	0	0	0	0	0	0	0	0	0	0	0	0	0	0	0	0.00628031	0	0	0	0	0	0	0	0	0	0	0	0	0	0	0	0	0	0	2.56531	0	0	0	0	0	0	0	0	0	0	0
Homoserinibacter	0	0	0	0	0	0	0	0	0	0	0	0	0	0	0	0	0	0	0	0	0	0	0	0	0	0	0	0	0	0	0	0	0	0	0	0	0	0	0	0	0	0	0	0	0	0	0	0	0
Humibacter	0	0	0	0	0	0	0	0	0	0	0	0	0	0	0	0	0	0	0	0	0	0	0	0	0	0	0	0	0	0	0	0	0	0	0	0	0	0	0	0	0	0	0	0	0	0	0	0	0
Hungateiclostridiaceae_norank	0	0	0	0	0	0	0	0	0	0	0	0	0	0	0	0	0	0	0	0	0	0	0	0	0	0	0	0	0	0	0	0	0	0	0	0	0	0	0	0	0	0	0	0	0	0	0	0	0
Hungateiclostridium	0.0760891	0	0	3.14021	0	0.408687	1.08688	0.157939	0	0.115313	0.0225093	0	0	0	0	0	0	0	0	0	1.55332	0.41129	0	0	0	0	0.0605626	0.170498	0.221314	0	0	0	0	0	0	3.35505	0.251992	0	0	0	0	0	0	0	0	0	0	0	0.468202
Hungatella	5.96693	0.0348403	0	0.0773313	0	0.604849	0.721536	1.64838	0	6.46533	0	0	0	1.73228	0	0.472266	0	0	1.97641	0.0365384	4.2002	0	0	0	0	0.212746	0	0.578887	0.677397	0.504319	0.183675	0	0	0	0.782285	0.946386	0	1.44027	0	0	0	0	0	0	0	0	0.0178401	0	0
Hyalangium	0.0181427	0	0	0	0	0	0	0	0	0	0	0	0	0	0	0	0	0	0	0	0	0	0	0	0	0	0	0	0	0	0	0	0	0	0	0	0	0	0	0	0	0	0	0	0	0	0	0	0
Hydridae	0	0	0	0	0	0	0	0	0	0	0	0	0	0	0	0	0	0	2.0307	0	0	0	0	0	0	0	0	0	0	0	0	0	0	0	0	0	0	0	0	0	0	0	0	0	0	0	0	0	0
Hydrobacter	2.30167	0.584289	0	0.715392	0	0.604272	0	0.552111	0	0	0	0	0	0	0	0	0	1.3062	0.583724	0.526699	1.29768	0	2.15038	0	0	0.536649	0	0.517903	1.83464	0	0	0	0	0	1.18746	0.681878	0.58702	0.585388	0	0	0	0	0	0	0	0.680184	1.84213	0	1.13981
Hydrogenispora	0.528629	0	0	0	0	0	0	0	0	0	0	0	0	0	0	0	0	0	0	0	0	0	0.070363	0	0	0.0457671	0	0	0.0543634	0	0.619028	0	0	0	2.46495	0	0	0.370112	0	0	0	0	0	0	0	0	0	0	0
Hydrogenoanaerobacterium	0.838737	0	0	0	0	0	0.107625	0	0	0	0	0	0	0	0	0	0	0	0	0	0	0	0	0	0	0	0	0	0	0	0	0	0	0	0	0	0	0	0	0	0	0	0	0	0	0	0	0	0.126467
Hydrogenophaga	0	0	0	0	0	0	0	0	0	0	0	0	0	0	0	0	0	0	0.0439488	0	0	0	0	0	0	0	0	0	0	0	0	0	0	0	0	0	0	0	0	0	0	0	0	0	0	0	0	0	0
Hydrogenothermus	0	0	0	0	0	0	0	0	0	0	0	0	0	0	0	0	0	0	0	0	0	0	0	0	0	0	0	0	0	0	0	0	0	0	0	0	0	0	0	0	0	0	0	0	0	0	0	0	0
Hydrotalea	0	0	0	0	0	0	0	0	0	0	0	0	0	0	0	0	0	0	0	0	0	0	0	0	0	0	0	0	0	0	0	0	0	0	0	0	0	0	0	0	0	0	0	0	0	0	0	0	0
Hymenobacter	0.117426	0.0154987	0	0.102302	0	0	0	0	0	0.0186684	0	0	0	0	0	0	0	0.0237631	0	0	0.453121	0	0	0	0	0	0	0.0100728	0.22654	0	0	0	0	0	0	0	0	1.83392	0	0	0	0	0	0	0	0	0	0	0
Hyphomicrobium	0	0	0	0	0	0	0	0	0	0	0	0	0	0	0	0	0	0	0	0	0	0	0	0	0	0	0	0	0	0	0	0	0	0	0	0.139564	0	0	0	0	0	0	0	0	0	0	0	0	0
Hyphomonadaceae_norank	0	0	0	0	0	0	0	0	0	0	0	0	0	0	0	0	0	0	0	0	0	0	0	0	0	0	0	0.178833	0	0	0	0	0	0	0	0	0	0	0	0	0	0	0	0	0	0	0	0	0
Hypnocyclicus	0	0.013823	0	0	0	0	0	0	0	0	0	0	0	0	0	0	0	0	0	0	0	0	0	0	0	0	0	0	0	0	0	0	0	0	0	0	0	0	0	0	0	0	0	0	0	0	0	0	0
Hypocreaceae	0	0	0	0	0	0	0	0	0	0	0	0	0	0	0	0	0	0	0.247631	0	0	0	0	0	0	0	0	0	0	0	0	0	0	0	0	0	0	0	0	0	0	0	0	0	0	0	0	0	0
Hypocreales_norank	0	0	0	0	0	0	0	0	0	0	0	0	0	0	0	0	0	0	0.0739889	0	0	0	0	0	0	0	0	0	0	0	0	0	0	0	0	0	0	0	0	0	0	0	0	0	0	0	0	0	0
Hypsibiidae	0	0	0	0	0	0	0	0	0	0	0	0	0	0	0	0	0	0	0	0	0	0	0	0	0	0	0	0	0	0	0	0	0	0	0	0	0	0	0	0	0	0	0	0	0	0	0	0	0
Hyunsoonleella	0	0	0	0.0563786	0	0	0	0	0	0	0	0	0	0	0	0	0	0	0	0	0.288502	0	0	0	0	0	0	0	0	0	0	0	0	0	0	0	0	0	0	0	0	0	0	0	0	0	0	0	0
Ichthyobacterium	0	0	0	0	0	0	0	0	0	0	0	0	0	0	0	0	0	0	0	0	0.135814	0	0	0	0	0	0	0	0	0	0	0	0	0	0	0	0	0	0	0	0	0	0	0	0	0	0	0	0
Ichthyophthirius	0	0	0	0	0	0	0	0	0	0	0	0	0	0	0	0	0	0	0	0	0	0	0	0	0	0	0	0.224863	0	0	0	0	0	0	0	0	0	0	0	0	0	0	0	0	0	0	0	0	0
Idiomarina	0	0	0	0	0	0	0	0	0	0	0	0	0	0	0	0	0	0	0	0	0	0	0	0	0	0	0	0.0395483	0	0	0	0	0	0	0	0	0	0	0	0	0	0	0	0	0	0	0.0334238	0	0
Ignavibacteria_norank	0	0	0	0	0	0	0.565901	0	0	0	0	0	0	0	0	0	0	0	4.04117	0	0.138887	0	0	0	0	0	0	0.0278469	0.429927	0	0	0	0	0	0.0100617	0	3.02329	0.0909253	0	0	0	0	0	0	0	0	0	0	0
Ignavibacteriae_norank	0.0225027	0	0	0	0	0	2.89516	0	0	0	0	0	0	0	0	0	0	0	0	0	0	0	0	0	0	0	0	0.117349	0	0.0241563	0	0	0	0	0	0	0	0	0	0	0	0	0	0	0	0	0	0	0
Ignavibacteriales_norank	0.0254013	0	0	0.136024	0	0	0	0	0	0	0	0	0	0	0	0	0	0	0	0	0	0	0	0	0	0	0	0.42309	0	0	0	0	0	0	0	0	0	0.0558458	0	0	0	0	0	0	0	0	0.0627443	0	0
Ignisphaera	0	0	0	0	0	0	0	0	0	0	0	0	0	0	0	0	0	0	0	0	0	0	0	0	0	0	0	0	0	0	0	0	0	0	0	0	0	0	0	0	0	0	0	0	0	0	0	0	0
Ilyomonas	0	0	0	0	0	0	0	0	0	0	0	0	0	0	0	0	0	0	0.215209	0	0	0	0	0	0	0	0.0967708	0.0223938	0.205053	0	0	0	0	0	0	0	0	0	0	0	0	0	0	0	0	0	0	0	0
Imperialibacter	0	0	0	0	0	0	0	0	0	0	0	0	0	0	0	0	0	0	0	0	0.52022	0	0	0	0	0	0	0	0	0	0	0	0	0	0	0	0	0	0	0	0	0	0	0	0	0	0	0	0
Indibacter	0	0	0	0	0	0	0	0	0	0	0	0	0	0	0	0	0	0	0	0	0	0	0	0	0	0	0	0	0	0	0	0	0	0	0	0	0	0.0176259	0	0	0	0	0	0	0	0	0	0	0
Indioceanicola	0	0	0	0	0	0	0	0	0	0	0	0	0	0	0	0	0	0	0	0	0	0	0	0	0	0	0	0.0305158	0	0	0	0	0	0	0	0	0	0	0	0	0	0	0	0	0	0	0	0	0
Inediibacterium	0.829318	0	0	0	0	0	0	0	0	0	0	0	0	0	0	0	0	0	0	0	0	0	0	0	0	0	0	0	0	0	0	0	0	0	0	0	0	0	0	0	0	0	0	0	0	0	0.23419	0	0
Inordinaticella	0.0444935	0	0	0	0	0	0.232894	0	0	0	0	0	0	0	0	0	0	0	0	0	0	0	0	0	0	0	0	0	0	0	0	0	0	0	0	0	0	0	0	0	0	0	0	0	0	0	0	0	0.057791
Inquilinus	0	0	0	0	0	0	0	0	0	0	0	0	0	0	0	0	0	0	0	0	0	0	0	0	0	0	0	0	0	0	0	0	0	0	0	0	0.0517948	0.0415839	0	0	0	0	0	0	0	0	0	0	0
Intestinibacillus	0	0	0	0	0	0	0	0	0	0	0	0	0	0	0	0	0	0	0	0	0.0227689	0	0	0	0	0	0	0	0	0.0702094	0	0	0	0	0	0	0	0	0	0	0	0	0	0	0	0	0	0	0
Intestinibacter	0.0978476	0	0	0	0	0	0	0	0	0	0	0	0	0	0	0	0	0	0	0	0	0	0	0	0	0	0	0	16.5475	0	0	0	0	0	0	0	0	0	0	0	0	0	0	0	0	0	0	0	0
Intestinibaculum	0	0	0	0	0	0	0	0.0614449	0	0	0	0	0	0	0	0	0	0	0	0	0	0	0	0	0	0	0	0	0	0	0	0	0	0	0	0	0	0	0	0	0	0	0	0	0	0	0	0	0
Intestinimonas	0.163329	0	0	0	0	0	0.0204494	0	0	0	0	0	0	0	0	0.0359015	0	0	0	0	0.0272375	0	0	0	0	0	0.132063	0	0.0216492	0	0	0	0	0	0	0	0	0	0	0	0	0	0	0	0	0	0	0	0
Isachenkonia	0	0	0	0	0	0	0	0	0	0	0	0	0	0	0	0	0	0	0	0	0	0	0	0	0	0	0	0	0	0	0	0	0	0	0	0	0	0	0	0	0	0	0	0	0	0	0	0	0
Isoptericola	0.0628828	0	0	0	0	0	0	0	0	0	0	0	0	0	0	0	0	0	0	0	0	0	0	0	0	0	0	0	0	0	0	0	0	0	0	0	0	0	0	0	0	0	0	0	0	0	0	0	0
Isosphaera	0	0	0	0	0	0	0	0	0	0	0	0	0	0	0	0	0	0	0	0	0	0	0	0	0	0	0	0	0	0	0	0	0	0	0	0	0	0	0	0	0	0	0	0	0	0	0	0	0
Janthinobacterium	0	0	0	0	0	0	0.0155012	0	0	0	0	0	0	0	0	0	0	0	0	0	0	0	0	0	0	0	0	0	0	0	0	0	0	0	0	0	0	0	0	0	0	0	0	0	0	0	0	0	0
Jejuia	0	0	0	0	0	0	0	0	0	0	0	0	0	0	0	0	0	0	0	0	0.0196244	0	0	0	0	0	0	0	0	0	0	0	0	0	0	0	0	0	0	0	0	0	0	0	0	0	0	0	0
Jeotgalibaca	0	0	0	0	0	0	0	0	0	0	0	0	0	0	0	0	0	0	0	0	0.2004	0	0	0	0	0	0	0	0	0	0.0346899	0	0	0	0	0	0	0	0	0	0	0	0	0	0	0	0	0	0
Jeotgalibacillus	0.01749	0	0	0	0	0	0	0	0	0	0	0	0	0	0	0	0	0	0	0	0.0196827	0	0	0	0	0	0	0.159193	0.0770964	0	0	0	0	0	0.0454653	0	0	0	0	0	0	0	0	0	0	0	0	0	0
Jiangella	0	0.0171026	0	0.506845	0	0	0	0	0	0	0	0	0	0	0	0	0	0	0	0	0	0	0.0725596	0	0.0422076	0	0.0946193	0	0	0.326188	0.385852	0	0	0.441264	0	0	0	0.511062	0	0	0	0	0	0	0	0	0	0	0
Jiulongibacter	0	0	0	0	0	0	0	0	0	0	0	0	0	0	0	0	0	0	0	0	0.758535	0	0	0	0	0	0	0	0	0	0	0	0	0	0	0	0	0	0	0	0	0	0	0	0	0	0	0	0
Johnsonella	0	0	0	0	0	0	0	0	0	0	0	0	0	0	0	0	0	0	0	0	0	0	0	0	0	0	0	0	0	0	0	0	0	0	0	0	0	0	0	0	0	0	0	0	0	0	0	0	0
Jonesia	0.00382069	0	0	0	0	0	0	0	0	0	0	0	0	0	0	0	0	0	0	0	0	0	0	0	0	0	0	0	0	0	0	0	0	0	0	0	0	0	0	0	0	0	0	0	0	0	0	0	0
Kallipyga	0	0	0	0	0	0	0	0	0	0	0	0	0	0	0	0	0	0	0	0	0	0	0	0	0	0	0	0	0	0	0	0	0	0	0	0	0	0	0	0	0	0	0	0	0	0	0	0	0
Kamptonema	0	0	0	0	0	0	0	0	0	0	0	0	0	0	0	0	0	0	0	0	0	0	0	0	0	0	0	0	0	0	0	0	0	0	0	0	0	0	0	0	0	0	0	0	0	0	0	0	0
Kandleria	0	0	0	0	0	0	0	1.44329	0	0	0	0	0	0	0	0	0	0	0	0	0	0	0	0	0	0	0	0	0	0	0	0	0	0	0	0	0	0	0	0	0	0	0	0	0	0	0	0	0
Kibdelosporangium	0	0	0	0	0	0	0	0	0	0	0	0	0	0	0	0	0	0	0	0	0	0	0	0	0	0	0	0	0.200152	0	0	0	0	0	0	0	0	0	0	0	0	0	0	0	0	0	0	0	0
Kineococcus	0	0	0	0.0189998	0	0	0	0	0	0	0	0	0	0	0	0	0	0	0	0	0	0	0	0	0	0	0	0	0	0	0	0	0	0	0	0	0	0	0	0	0	0	0	0	0	0	0	0	0
Kineothrix	2.44398	0.114399	0	0.56595	0	1.71804	1.05797	0.0272235	0	0	0	0	0	0.0152877	0	0.162547	0	0	0.257476	0.0243286	1.37612	0	0.230009	0	0	0.0715279	0	2.14304	0.292363	0	0	0	0	0	0.0767857	0.479128	0	0	0	0	0	0	0	0	0	0	0	0	0
Kiritimatiella	0	0	0	0	0	0.0248077	0	0	0	0	0	0.199879	0	0	0	0	0	0	0	0	0	0	0	0	0	0	0	0	0	0	0	0	0	0	0	0	0	0	0	0	0	0	0	0	0	0	0	0	0
Kiritimatiellaceae_norank	0.0239179	0	0	0	0	0	0.364043	0	0	0	0	0	0	0	0	0	0	0	0	0	0	0	0	0	0	0	0.0130094	0.0224426	0	0	0	0	0	0	0	0	0	0	0	0	0	0	0	0	0	0	0	0	0
Kiritimatiellaeota_norank	0.0683485	0	0	0.0857216	0	0	0	0	0	0	0	0	0	0	0	0	0	0	0	0	0	0	0	0	0	0	0	0	0.599603	0	0.0298906	0	0	0	0	0	0	0.133762	0	0	0	0	0	0.109205	0	0	0	0	0
Kiritimatiellales_norank	0	0	0	0.0264087	0	0	0.396677	0.0340411	0	0	0	0.131831	0	0	0	0.0264549	0	0.0104561	0	0	0.0912653	0	0	0	0	0.146555	0.0333355	0	0.125698	0	0.0171029	0	0	0	0.176292	0.248993	0	0.11254	0	0	0	0	0	0.0314973	0	0	0	0	0
Kitasatospora	0	0	0	0	0	0	0	0	0	0	0	0	0	0	0	0	0	0	0	0	0	0	0	0	0	0	0	0	0	0	0	0	0	0	0	0	0	0	0	0	0	0	0	0	0	0	0	0	0
Klebsiella	0	0	0	0	0	0	0	0	0	0	0	0	0	0	0	0	0	0	0.0195913	0	0	0	0	0	0	0	0	0	0	0.396304	0	0	0	0	0	0	0	0.151302	0	0	0	0	0	0	0	0	0	0	0
Klebsormidiaceae	0	0	0	0	0	0	0	0	0	0	0	0	0	0	0	0	0	0	0	0	0	0	0	0	0	0	0	0	0	0	0	0	0	0	0	0	0	0	0	0	0	0	0	0	0	0	0	0	0
Klenkia	0	0	0	0	0	0	0	0	0	0	0	0	0	0	0	0	0	0	0	0	0	0	0	0	0	0	0	0	0	0	0	0	0	0	0	0	0	0	0	0	0	0	0	0	0	0	0	0	0
Kluyvera	0.0124011	0	0	0	0	0	0	0	0	0	0	0	0	0	0	0	0	0	0.0198121	0	0	0	0	0	0	0	0	0	0	0	0	0	0	0	0	0	0	0	0	0	0	0	0	0	0	0	0	0	0
Kocuria	0	0	0	0.0347894	0	0	0	0	0	0	0	0	0	0	0	0	0	0	0	0	0	0	0	0	0	0	0	0	0	0	0	0	0	0	0	0	0	0	0	0	0	0	0	0	0	0	0	0	0
Kosmotoga	20.2628	0	0	0	0	0	0	0	0	0	0	0	0	0	0	0	0	0	0	0	0	0	0	0	0	0	0	0.0234995	0	0	0	0	0	0	0	0	0	0	0	0	0	0	0	0	0	0	0	0	0
Kosmotogaceae_norank	0	0	0	0	0	0	0	0	0	0	0	0	0	0	0	0	0	0	0	0	0	0	0	0	0	0	0	0	0	0	0	0	0	0	0	0	0	0	0	0	0	0	0	0	0	0	0	0	0
Kouleothrix	0	0	0	0	0	0	0	0	0	0	0	0	0	0	0	0	0	0	0	0	0	0	0	0	0	0.0313911	0	0	0	0.51063	0	0	0	0	0	0	0	0	0	0	0	0	0	0	0	0	0	0	0
Krasilnikoviella	0	0	0	0	0	0	0	0	0	0	0	0	0	0	0	0	0	0	0	0	0	0	0	0	0	0	0	0	0	0	0	0	0	0	0	0	0	0	0	0	0	0	0	0	0	0	0	0	0
Kribbella	0	0	0	0	0	0	0	0	0	0	0	0	0	0	0	0	0	0	0	0.0131822	0	0	0	0	0.0432855	0	0	0	0.109572	0.161509	0	0	0	0.0182514	0	0.0187291	0	0.0338623	0	0	0	0	0	0	0	0	0	0	0
Kriegella	0	0	0	0	0	0	0	0	0	0	0	0	0	0	0	0	0	0	0	0	0	0	0	0	0	0	0.102343	0	0	0	0	0	0	0	0	0	0	0.0430282	0	0	0	0	0	0	0	0	0	0	0
Ktedonobacter	0.02757	0	0	0	0	0	0	0	0	0	0	0	0	0	0	0	0	0	0	0	0	0	0	0	0	0	0	0	0	0	0	0	0	0	0	0	0	0	0	0	0	0	0	0	0	0	0	0	0
Ktedonosporobacter	0	0	0	0	0	0	0	0	0	0	0	0	0	0	0	0	0	0	0	0	0	0	0	0	0	0	0	0	0	0	0	0	0	0	0	0	0	0	0	0	0	0	0	0	0	0	0	0	0
Kurthia	0	0	0	0	0	0	0	0	0	0	0	0	0	0	0	0	0	0	0	0	0	0	0	0	0	0	0	0	0	0	0	0	0	0	0	0	0	0	0	0	0	0	0	0	0	0	0	0	0
Kutzneria	0	0.509783	0	0	0	0	0	0	0	0	0	0	0	0	0	0	0	0	0	0	0	0	0	0	0	0	0	0	0	0	0	0	0	0	0	0	0	0	0	0	0	0	0	0	0	0	0	0	0
Labilibacter	0.0600662	0	0	0.101929	0	0.557426	0	0	0	0	0	0	0	0	0	0	0	0	0	0	0.765346	0	0	0	0	0	0.12688	0.0581057	0	0	0	0	0	0	0.0844487	0.0127096	0	0	0	0.0964607	0	0	0	0	0	0	0	0	0
Labilibaculum	0	0.0254599	0	0.0179884	0	0	0	0	0	0	0	0	0	0	0	0	0	0	0.219816	0	0	0	0	0	0	0	0	0.189295	0.140956	0	0	0	0	0	0.063963	0	0	0.186839	0	0	0	0	0	0	0	0	0.82134	0	0
Labilithrix	0	0	0	0	0	0	0	0	0	0	0	0	0	0	0	0	0	0	0	0	0	0.024858	0	0	0	0	0	0	0	0	0	0	0	0	0	0	0	0	0	0	0	0	0	0	0	0	0	0	0
Labrenzia	0	0	0	0	0	0	0	0	0	0	0	0	0	0	0	0	0	0	0	0	0.021868	0	0	0	0	0	0	0	0	0	0	0	0	0	0	0	0	0	0	0	0	0	0	0	0	0	0	0	0
Lachnoanaerobaculum	0	0	0	0.00337731	0	0	0	0	0	0	0	0	0	0	0	0	0	0	0	0	0	0	0	0	0	0	0	0	0	0	0	0	0	0	0	0	0	0	0	0	0	0	0	0	0	0	0	0	0
Lachnobacterium	0	0	0	3.78158	0	0	0	0	0	0	0	0	0	0	0	0	0	0	0	0	0.469099	0	0.0307607	0	0	0.0188235	0	0	0	0.0649244	0	0	0	0	0	0	0	0	0	0	0	0	0	0	0	0	0	0	0
Lachnoclostridium	11.8024	0.232797	0	2.33787	0	0.233766	1.9757	2.63541	0	1.40476	1.11034	0	0.0348364	0	0	0.0427468	0	0.528802	2.41801	0.169637	18.9872	0	0.276037	0	0	0.690203	3.11443	1.09809	11.8455	1.17861	3.95399	0	0	0	2.00571	5.81422	0.275118	34.7323	0	0.0495355	0	0	0	0	0	0	0.181523	0	0
Lachnospira	0.021717	0	0	1.57608	0	0	0	0.0283802	0	0	0	0	0	0.00862431	0	0.0910071	0	0.553192	0.101879	0	1.42648	0	2.92853	0	0	0.0518528	0	0.022964	3.0286	0	0	0	0	0	0.497093	2.37553	0	0.214822	0	0	0	0	0	0	0	0	0	0	0
Lachnospiraceae_norank	156.954	3.47753	0	55.9903	0	26.1613	35.8823	15.1587	0.204849	37.0246	1.15507	12.1565	10.1693	5.51138	0.0226971	18.7478	0	5.72875	49.6255	4.38392	87.1532	0	35.8434	0	2.21338	11.1142	1.69129	7.62196	98.5421	20.954	6.66794	0.205187	0	1.64962	8.35686	9.26402	8.88137	27.6122	0.0226971	0.394948	0.446033	0	0	0.403187	0	0.255884	1.19178	0.327191	0
Lachnotalea	3.2995	0.445008	0	0.260136	0	0	1.4096	0.0089235	0	0.0221629	0	1.36919	0	0	0	0.0650004	0	0	0.482233	0.111699	2.82237	0	0.262181	0	0	0.047956	0.976416	0.232695	1.60113	4.71647	0.0283681	0	0	0	5.31306	1.77063	0	7.77019	0	0	0	0	0	0	0	0	0.044975	0	0
Lacibacter	0	0	0	0	0	0	0	0	0	0	0	0	0	0	0	0	0	0	0	0	0	0	0	0	0	0	0	0	0	0	0	0	0	0	0	0.0202549	0	0	0	0	0	0	0	0	0	0	0	0	0
Lacimicrobium	0	0	0	0	0	0	0	0	0	0	0	0	0	0	0	0	0	0	0	0	0	0	0	0	0	0	0	0	0	0	0	0	0	0	0	0	0	0	0	0	0	0	0	0	0	0	0	0	0
Lacinutrix	0	0	0	0	0	0	0	0	0	0	0	0	0	0	0	0	0	0	0	0	0	0	0	0	0	0	0	0.0218479	0	0	0	0	0	0	0	0	0	0	0	0	0	0	0	0	0	0	0	0	0
Lacticigenium	0	0	0	0	0	0	0	0	0	0	0	0	0	0	0	0	0	0	0.0234629	0	0	0	0	0	0	0	0	0	0	0	0	0	0	0	0	0	0	0	0	0	0	0	0	0	0	0	0	0	0
Lactimicrobium	0	0	0	0	0	0	0	0.671147	0	0	0	0	0	0	0	0	0	0	0	0	0	0	0	0	0	0	0	0	0.0344374	0	0	0	0	0	0	0	0	0.0676402	0	0	0	0	0	0	0	0	0	0	0
Lactobacillus	0.404055	0.0433739	0	0.0207712	0	0	0	0.297667	0	0	0	0	0	0	0	0	0	0.00861969	0.120914	0.0368108	0.237977	0	0.731302	0	0	0	0	0	0.913694	0	0.0182686	0	0	0.0203133	0	0.520546	0.0113	2.21922	0	0	0	0	0	0	0	0	0	0	0.0142676
Lactococcus	0	0	0	0	0	0	0	0	0	0	0	0	0	0	0	0	0	0	0.0273696	0	0.0803802	0	0	0	0	0	0	0	0	0	0	0	0	0	0	0	0	0	0	0	0	0	0	0	0	0	0	0	0
Lactonifactor	0	0	0	0	0	0	0	0	0	0	0	0	0	0	0	0	0	0.288223	0	0	1.20314	0	0	0	0	0.0665256	0	0	0.535396	0	0	0	0	0	0	0	0	0	0	0	0	0	0	0	0	0	0	0	0
Lacunisphaera	0	0	0	0	0	0	0	0	0	0	0	0	0	0	0	0	0	0	0	0	0.0877023	0	0	0	0	0	0	0	0.052778	0	0	0	0	0	0	0	0	0	0	0	0	0	0	0	0	0	0	0	0
Larkinella	0	0	0	0	0	0	0	0	0	0	0	0	0	0	0	0	0	0	0	0	0.100288	0	0	0	0	0	0.605753	0	0	0	0.530477	0	0	0.345927	0.11213	0.0285466	0	0	0	0	0	0	0	0	0	0	0	0	0
Lascolabacillus	0	0	0	0	0	0	0	0	0	0	0	0	0	0	0	0	0	0	0	0	0	0	0	0	0	0	0	0	0	0	0	0	0	0	0	0	0	0.0279157	0	0	0	0	0	0	0	0	0	0	0
Lawsonella	0	0	0	0	0	0	0	0	0	0	0	0	0	0	0	0	0	0	0	0	0.0336589	0	0	0	0	0	0	0	0	0	0	0	0	0	0	0	0	0	0	0	0	0	0	0	0	0	0	0	0
Lawsonibacter	0.0936232	0	0	0	0	0.017748	0.0401764	0	0	0	0	0	0	0	0	0	0	0	0	0	0	0	0	0	0	0	0	0	0	0	0	0	0	0	0	0	0	0	0	0	0	0	0	0	0	0	0	0	0
Leeuwenhoekiella	0	0.0391188	0	0	0	0	0	0	0	0	0	0	0	0	0	0	0	0	0	0	0.698504	0	0	0	0	0	0	0.0296264	0.0307396	0	0	0	0	0	0	0.377748	0.230357	0.29349	0	0	0	0	0	0	0	0	0	0	0
Legeriomycetaceae	0	0	0	0	0	0	0	0	0	0	0	0	0	0	0	0	0	0	1.44915	0	0	0	0	0	0	0	0	0	0	0	0	0	0	0	0	0	0	0	0	0	0	0	0	0	0	0	0	0	0
Legionella	0	0	0	0.0192549	0	0	0	0	0	0	0	0	0	0	0	0	0	0	0	0	0	0	0	0	0	0	0	0	0	0	0	0	0	0	0	0	0	0	0	0	0	0	0	0	0	0	0	0	0
Legionellales_norank	0	0	0	0	0	0	0	0	0	0	0	0	0	0	0	0	0	0	0	0	0	0	0	0	0	0	0	0	0	0	0	0	0	0	0	0	0	0	0	0	0	0	0	0	0	0	0	0	0
Leifsonia	0	0	0	0	0	0	0	0	0	0	0	0	0	0	0	0	0	0	0.0220233	0	0.133468	0	0	0	0	0	0.0269006	0	0	0	0	0	0	0.0215783	0	0	0	0	0	0	0	0	0	0	0	0	0	0	0
Leminorella	0	0	0	0	0	0	0	0	0	0	0	0	0	0	0	0	0	0	0	0	0	0	0	0	0	0	0	0	0	0	0	0	0	0	0	0	0	0	0	0	0	0	0	0	0	0	0	0	0
Lentibacillus	0	0	0	0	0	0	0	0	0	0	0	0	0	0	0	0	0	0	0	0	0	0	0	0	0	0	0	0	0	0	0	0	0	0	0	0	0	0	0	0	0	0	0	0	0	0	0	0	0
Lentimicrobiaceae_norank	0	0	0	0	0	0	0	0	0	0	0	0	0	0	0	0	0	0	0	0	0	0	0	0	0	0	0	0.0702144	0	0	0	0	0	0	0	0	0	0	0	0	0	0	0	0	0	0	0	0	0
Lentimicrobium	0	0	0	0	0	0	0	0	0	0	0	0	0	0	0	0	0	0	0	0	0	0	0	0	0	0	0	0.0258447	0	0	0	0	0	0	0	0	0	0	0	0	0	0	0	0	0	0	0	0	0
Lentimonas	0	0	0	0	0	0	1.67225	0	0	0	0	0	0	0	0	0	0	0	0	0	0	0	0	0	0	0	0.0411196	0	0	0	0	0	0	0	0	0.0284384	0	0	0	0	0	0	0	0	0	0	0	0	0
Lentisphaera	0	0	0	0.177231	0	0	0	0	0	0	0	0	0	0	0	0	0	0	0.0676006	0	0	0	0	0	0	0	0.149361	0	0	0	0	0	0	0.0981692	0	0	0	0	0	0	0	0	0	0	0	0	0	0	0
Lentisphaerae_norank	0.110629	0	0	20.1839	0	0.0138172	3.64905	0.0455853	0	2.27478	0	0.454953	0	0	0	0	0	1.33565	0.455298	0.190695	5.02655	0	0.396925	0	0	2.67772	1.61278	4.60561	2.31424	6.69267	3.15119	0	0	0.206615	0.744068	3.77579	0.0906445	2.46362	0	0.119523	0	0	0	0	0	0	0.480325	0	0
Lentisphaerales_norank	0	0	0	0.0241969	0	0	0	0	0	0	0	0	0	0	0	0	0	0	0	0	0	0	0	0	0	0	0	0	0	0	0	0	0	0	0	0	0	0.0581314	0	0	0	0	0	0	0	0	0	0	0
Lentisphaeria_norank	0.862696	0.112597	0	5.56643	0	3.21927	0.115076	0.0284983	0	1.3227	0	0	0	0	0	0	0	0.399178	0	0	1.53386	0	0	0	0.336298	1.9044	1.11695	2.7199	1.96135	12.8746	0.7519	0	0	0.0386707	0	6.99624	0	2.49848	0	0.0484931	0	0	0	0.372211	0	0	0.190629	0	0
Leporidae	0	0	0	0	0	0	0	0	0	0	0	0	0	0	0	0	0	0	0.166746	0	0	0	0	0	0	0	0	0	0	0	0	0	0	0	0	0	0	0	0	0	0	0	0	0	0	0	0	0	0
Leptolinea	0	0	0	0	0	0	0	0	0	0	0	0	0	0	0	0	0	0	0	0	0	0	0	0	0	0	0	0	0	0	0	0	0	0	0	0	0	0	0	0	0	0	0	0	0	0	0	0	0
Leptolyngbya	0	0	0	0	0	0.106596	0	0	0	0.0307364	0	0	0	0	0	0	0	0	0	0	0	0	0	0	0	0	0	0	0	0	0	0	0	0	0	0	0	0.025807	0	0	0	0	0	0	0	0	0	0	0
Leptospira	0	0	0	0	0	0	0	0	0	0	0	0	0	0	0	0	0	0	0	0	20.7193	0	0	0	0	0	0	0	0.372097	0	0	0	0	0	0	0	0	0	0	0	0	0	0	0	0	0	0	0	0
Leptotrichia	0	0	0	0	0	0	0	0	0	0	0	0	0	0	0	0	0	0	0	0	0	0	0	0	0	0	0	0	0	0	0	0	0	0	0	0	0	0	0	0	0	0	0	0	0	0	0	0	0
Leuconostoc	0	0	0	0	0	0	0	0.0158244	0	0	0	0	0	0	0	0	0	0	0	0	0	0	0	0	0	0	0	0	0	0	0	0	0	0	0	0	0	0	0	0	0	0	0	0	0	0	0	0	0
Levyella	0	0	0	0	0	0	0	0	0	0	0	0	0	0	0	0	0	0	0	0	0	0	0	0	0	0	0	0	0	0	0	0	0	0	0	0	0	0	0	0	0	0	0	0	0	0	0	0	0
Lewinella	0	0	0	0	0	0	0	0	0	0	0	0	0	0	0	0	0	0	0	0	0.807677	0	0	0	0	0	0	0.0980278	1.43229	0	0	0	0	0	0	0	0	0.0804415	0	0	0	0	0	0	0	0	0	0	0
Lihuaxuella	0.0672164	0	0	0	0	0	0	0	0	0	0	0	0	0	0	0	0	0	0.101817	0	0	0	0	0	0	0	0	0	0	0	0	0	0	0	0	0	0	0	0	0	0	0	0	0	0	0	0	0	0
Limihaloglobus	0	0	0	0	0	0	0	0	0	0	0	0	0	0	0	0	0	0	0	0	0	0	0	0	0	0	0	0	0.669249	0	0.0232606	0	0	0	0	1.13499	0	0	0	0	0	0	0	0	0	0	0	0	0
Limulidae	0	0	0	0	0	0	0	0	0	0	0	0	0	0	0	0	0	0	0	0	0	0	0	0	0	0	0	0	0	0	0	0	0	0	0	0	0	0	0	0	0	0	0	0	0	0	0	0	0
Lingulidae	0	0	0	0	0	0	0	0	0	0	0	0	0	0	0	0	0	0	0	0	0	0	0	0	0	0	0	0	0	0	0	0	0	0	0	0	0	0	0	0	0	0	0	0	0	0	0	0	0
Listeria	0.0918884	0	0	0.163468	0	0	0	0.0316887	0	0	0	0	0	0	0	0	0	0	0	0	0.44442	0	0	0	0	0	0	0	0	0	0	0	0	0	0	0	0	0.256238	0	0	0	0	0	0	0	0	0	0	0
Litoribacter	0	0	0	0	0	0	0	0	0	0	0	0	0	0	0	0	0	0	0	0	0	0	0	0	0	0	0	0.125555	0	0	0	0	0	0	0	0	0	0	0	0	0	0	0	0	0	0	0	0	0
Litorilinea	0.0906043	0	0	0	0	0	0	0	0	0	0	0	0	0	0	0	0	0	0	0	0	0	0.015567	0	0.408652	0	0	0	0	0	0.552302	0	0	0	0	0	0	0	0	0	0	0	0	0	0	0	0	0	0
Lonepinella	0	0	0	0	0	0	0	0.019758	0	0	0	0	0	0	0	0	0	0	0	0	0	0	0	0	0	0	0	0	0	0	0	0	0	0	0	0	0	0	0	0	0	0	0	0	0	0	0	0	0
Longibaculum	0.250865	0	0	0	0	0	0	1.41655	0	0	0	0	0	0	0	0	0	0	0	0	0	0	0	0	0	0	0	0.163147	0	0	0	0	0	0	0	0	0	0	0	0	0	0	0	0	0	0	0	0	0
Longicatena	0	0	0	0	0	0	0	0	0	0	0	0	0	0	0	0	0	0	0	0	0	0	0	0	0	0	0	0	0	0	0	0	0	0	0	0	0	0	0	0	0	0	0	0	0	0	0	0	0
Longilinea	0	0	0	0	0	0	0	0	0	0	0	0	0	0	0	0	0	0	0	0	0	0	0	0	0	0	0	0	0	0	0	0	0	0	0	0	0	0	0	0	0	0	0	0	0	0	0	0	0
Longimonas	0	0	0	0	0	0	0	0	0	0	0	0	0	0	0	0	0	0	0	0	0.0968161	0	0	0	0	0	0	0	0	0	0	0	0	0	0	0	0	0	0	0	0	0	0	0	0	0	0	0	0
Longirhabdus	0	0	0	0	0	0	0	0	0	0	0	0	0	0	0	0	0	0	0	0	0	0	0	0	0	0	0	0	0	0	0	0	0	0	0	0	0	0	0	0	0	0	0	0	0	0	0	0	0
Lophiotremataceae	0	0	0	0	0	0	0	0	0	0	0	0	0	0	0	0	0	0	0.0627844	0	0	0	0	0	0	0	0	0	0	0	0	0	0	0	0	0	0	0	0	0	0	0	0	0	0	0	0	0	0
Lottiidae	0	0	0	0	0	0	0	0	0	0	0	0	0	0	0	0	0	0	0.103593	0	0	0	0	0	0	0	0	0	0	0	0	0	0	0	0	0	0	0	0	0	0	0	0	0	0	0	0	0	0
Lottiidibacillus	0	0	0	0	0	0	0	0.0237069	0	0	0	0	0	0	0	0	0	0	0	0	0	0	0	0	0	0	0	0	0	0	0	0	0	0	0	0	0	0	0	0	0	0	0	0	0	0	0	0	0
Lucifera	0	0.113838	0	0	0	0	0	0	0	0	0	0	0	0	0	0	0	0	0.38433	0	0	0	0	0	0	0.0429624	0	0	0	0	0	0	0	0	0	0	0	0	0	0	0	0	0	0	0	0	0	0	0
Lujinxingia	0	0	0	0	0	0	0	0	0	0	0	0	0	0	0	0	0	0	0	0	0	0	0	0	0	0	0	0	0	0	0	0	0	0	0	0	0	0	0	0	0	0	0	0	0	0	0	0	0
Lunatimonas	0	0	0	0	0	0	0	0	0	0	0	0	0	0	0	0	0	0	0	0	0	0	0	0	0	0	0	1.35004	0	0	0	0	0	0	0	0	0	0	0	0	0	0	0	0	0	0	0	0	0
Luteibacter	0	0	0	0	0	0	0	0	0	0	0	0	0	0	0	0	0	0	0	0.0225379	0	0	0	0	0	0	0	0	0	0	0	0	0	0	0	0	0	0	0	0	0	0	0	0	0	0	0	0	0
Luteimicrobium	0	0	0	0	0	0	0	0	0	0	0	0	0	0	0	0	0	0	0	0	0.0808364	0	0	0	0	0	0	0	0	0	0	0	0	0	0	0	0	0	0	0	0	0	0	0	0	0	0	0	0
Luteimonas	0	0	0	0	0	0	0	0	0	0	0	0	0	0	0	0	0	0	0	0	0	0	0	0	0	0	0	0	0	0	0	0	0	0	0	0	0	0	0	0	0	0	0	0	0	0	0	0	0
Luteitalea	0	0	0	0	0	0	0	0	0	0	0	0	0	0	0	0	0	0	0	0	0.0780986	0	0	0	0	0	0	0	0	0	0	0	0	0	0	0	0	0	0	0.0288922	0	0	0	0	0	0	0	0	0
Luteococcus	0	0	0	0	0	0	0	0	0	0	0	0	0	0	0	0	0	0	0	0	0	0	0	0	0	0	0	0.391219	0.0597754	0	0	0	0	0	0	0	0	0	0	0	0	0	0	0	0	0	0	0	0
Lutibacter	0.0572725	0	0	0	0	0	0.167884	0	0	0.0515315	0	0	0	0	0	0	0	0	0	0	0.472588	0	0	0	0	0	0	0	0	0	0	0	0	0	0	0.126277	0	0.0183677	0	0	0	0	0	0	0	0	0	0	0
Lutispora	0	0	0	0	0	0	0.488106	0	0	0	0	0	0	0	0	0	0	0	0	0	0	0	0	0	0	0	0	0	0	0	0	0	0	0	0	0	0	0	0	0	0	0	0	0	0	0	0	0	0.525615
Lysinibacillus	0.143216	0	0	0	0	0	0	0	0	0	0	0	0	0	0	0	0	0	0	0	0	0	0	0	0	0	0	0.0345581	0	0	0	0	0	0	0	0.0136007	0	0	0	0	0	0	0	0	0	0	0	0	0
Lysinimicrobium	0.0202391	0	0	0	0	0	0	0	0	0	0	0	0	0	0	0	0	0	0	0	0	0	0	0	0	0	0	0	0	0	0	0	0	0	0	0	0	0	0	0	0	0	0	0	0	0	0	0	0
Lysinimonas	0	0	0	0	0	0	0	0	0	0	0	0	0	0	0	0	0	0	0	0	0	0	0	0	0	0	0	0	0	0	0	0	0	0	0	0	0	0	0	0	0	0	0	0	0	0	0	0	0
Lysobacter	0	0	0	0	0	0	0	0	0	0	0	0	0	0	0	0	0	0	0	0	0	0	0	0	0	0	0	0	0	0	0	0	0	0	0	0.0651496	0	0	0	0	0	0	0	0	0	0	0	0	0
Macellibacteroides	0	0	0	0	0	0	0	0	0	0	0	0	0	0	0	0	0	0	0	0	0.0574082	0	0	0	0	0.0155707	0	0	0	0	0	0	0	0	0	0	0	0.180485	0	0	0	0	0	0	0	0	0	0	0
Mageeibacillus	0.444123	0	0	0	0	0	0.0284509	0	0	0	0	0	0	0	0	0	0	0	0	0	0	0	0	0	0	0	0	0	0	0	0	0	0	0	0	0	0	0	0	0	0	0	0	0	0	0	0	0	0
Magnetospirillum	0	0	0	0	0	0	0	0	0	0	0	0	0	0	0	0	0	0	0	0	0	0	0	0	0	0	0	0	0	0	0	0	0	0	0	0	0	0	0	0	0	0	0	0	0	0	0	0	0
Mahella	0.0141577	0.0944238	0	1.18926	0	0.0337439	0	0	0	0.0442712	0	0	0	0	0	0	0	0.108463	0.726606	0	0	0	0.0464145	0	0.179031	0.413427	0.461467	0	2.41314	0	0	0	0	0	0	0	0	0.114122	0	0	0	0	0	0	0	0	0	0	0
Mailhella	0	0	0	0	0	0	0	0	0	0	0	0	0	0	0	0	0	0	0	0	0	0	0	0	0	0	0	0	0	0	0	0	0	0	0	0	0	0	0	0	0	0	0	0	0	0	0	0	0.759128
Maledivibacter	0.0113452	0	0	0	0	0	0	0	0	0	0	0	0	0	0	0	0	0	0	0	0	0	0	0	0	0	0	0	0	0	0	0	0	0	0	0	0	0	0	0	0	0	0	0	0	0	0	0	0
Malvaceae	0	0	0	0	0	0	0	0	0	0	0	0	0	0	0	0	0	0	0	0	0	0	0	0	0	0	0	0	0	0	0	0	0	0	0	0	0	0	0	0	0	0	0	0	0	0	0	0	0
Mangrovibacterium	0.151862	0	0	2.37337	0	0	0	0	0	0	0	0	0	0	0	0	0	0.0223539	0	0	7.39504	0	0.230515	0	0	0	0	0	2.75551	0.251687	0	0	0	0	0.0777601	0	0	0.0716926	0	0	0	0	0	0	0	0	0	0	0
Mangrovimonas	0	0	0	0	0	0	0	0	0.0380601	0	0	0	0	0	0	0	0	0	0	0	0.188586	0	0	0	0	0	0	0	0	0	0	0	0	0	0	0	0	0	0	0	0	0	0	0	0	0	0	0	0
Mannheimia	0.00807262	0	0	0	0	0	0	0	0	0	0	0	0	0	0	0	0	0	0	0	0	0	0	0	0	0	0	0	0.0591664	0	0	0	0	0	0	0	0	0	0	0	0	0	0	0	0	0	0	0	0
Marasmiaceae	0	0	0	0	0	0	0	0	0	0	0	0	0	0	0	0	0	0	0	0	0	0	0	0	0	0	0	0	0	0	0	0	0	0	0	0	0	0	0	0	0	0	0	0	0	0	0	0	0
Marasmitruncus	0	0	0	0	0	0	0	0.0336852	0	0	0	0.0607958	0	0	0	0	0	0.0323742	0	0	0	0	0	0	0	0	0	0	0	0	0	0	0	0	0	0	0	0	0	0	0	0	0	0	0	0	0	0	0
Marchantiaceae	0	0	0	0	0	0	0	0	0	0	0	0	0	0	0	0	0	0	0	0	0	0	0	0	0	0	0	0	0	0	0	0	0	0	0	0	0	0	0	0	0	0	0	0	0	0	0	0	0
Maribacter	0.0293342	0	0	0	0	0	0	0	0	0.0107466	0	0	0	0	0	0	0	0	0	0	0.129113	0	0	0	0	0	0	0	0	0	0	0	0	0	0	0.0328577	0	0.826177	0	0	0	0	0	0	0	0	0	0	0
Maribellus	0.0512409	0	0	0	0	0	0	0	0	0	0	0	0	0	0	0	0	0	0	0	0.0146749	0	0	0	0	0	0	0	0.0480816	0	0	0	0	0	0	0	0	2.3618	0	0	0	0	0	0	0	0	0	0	0
Marimonas	0	0	0	0	0	0	0	0	0	0	0	0	0	0	0	0	0	0	0	0	0	0	0	0	0	0	0	0	0	0.0898609	0	0	0	0	0	0	0	0	0	0	0	0	0	0	0	0	0	0	0
Mariniblastus	0	0	0	0	0	0	0	0	0	0.0312311	0	0	0	0	0	0	0	0	0	0	0	0	0	0	0	0	0	0	0	0	0	0	0	0	0	0	0	0	0	0	0	0	0	0	0	0	0	0	0
Marinifilaceae_norank	0	0	0	0	0	0	0	0	0	0	0	0	0	0	0	0	0	0	0	0	0	0	0	0	0	0	0	0	0	0	0	0	0	0	0	0	0	0	0	0	0	0	0	0	0	0	0	0	0
Marinifilum	0.0198653	0	0	0	0	0	0	0	0	0	0	0	0	0	0	0	0	0	0	0	0	0	0	0	0	0	0	0.128159	0	0	0	0	0	0	0	0	0	0	0	0	0	0	0	0	0	0	0	0	0
Mariniflexile	0	0	0	0	0	0	0	0	0	0	0	0	0	0	0	0	0	0	0	0	0.0445482	0	0	0	0	0	0.106161	0	0	0	0	0	0	0	0	0	0	0	0	0	0	0	0	0	0	0	0	0	0
Marinilabilia	0.890634	0.0213839	0	1.37303	0	0	0	0	0	0.00723831	0	0	0	0	0	0	0	0	0.104437	0	0.199969	0	0.190726	0	0	0	0	0	0.397881	0	0	0	0	0	0	0	0	0	0	0	0	0	0	0	0	0	0	0	0
Marinilabiliaceae_norank	0.226623	0	0	0	0	0.127108	0	0	0	0	0	0	0	0	0	0	0	0	0	0	0	0	0	0	0	0	0	0	0.0380909	0.0353369	0	0	0	0	0	0	0	0	0	0	0	0	0	0	0	0	0	0	0
Marinilabiliales_norank	0.423741	0	0	0.162675	0	0	0	0	0	0.0147006	0	0	0	0	0	0	0	0	0.151702	6.06976	0.416979	0	0	0	0	0	0.0419617	0.668233	0	0.0151071	0	0	0	0	2.18561	0.0154856	0	0	0	0	0	0	0	0	0	0	1.65375	0	0
Marinilactibacillus	0	0	0	0.0395549	0	0	0	0	0	0	0	0	0	0	0	0	0	0	0.0177789	0	0	0	0	0	0	0	0	0	0	0	0	0	0	0	0	0	0	0	0	0	0	0	0	0	0	0	0	0	0
Marinimicrobium	0	0	0	0	0	0.377277	0	0	0	0	0	0	0	0	0	0	0	0	0	0	0	0	0	0	0	0	0	0	4.18864	0	0	0	0	0	0.286289	0.0525385	0	0	0	0	0	0	0	0	0	0	0	0	0
Mariniphaga	0.0125226	0.333294	0	0.0999703	0	0	0	0	0	1.0102	0	0	0	0	0	0	0	0	0	0	3.5751	0	0	0	0	0	0.156041	0.183717	1.44511	0	0.686557	0	0	0	0.0161135	7.91165	0	0.300791	0	0	0	0	0	0	0	0	0.0338873	0	0
Mariniradius	0	0	0	0	0	0	0	0	0	0	0	0	0	0	0	0	0	0	0	0	0	0	0	0	0	0	0	0	0	0	0	0	0	0	0	0	0	0	0	0	0	0	0	0	0	0	0	0	0
Marinithermus	0	0	0	0	0	0	0	0	0	0	0	0	0	0	0	0	0	0	0	0	0	0	0	0	0	0	0	0	0	0	0	0	0	0	0	0	0	0	0	0	0	0	0	0	0	0	0	0	0
Marinitoga	0	0	0	0	0	0	0	0	0	0	0	0	0	0	0	0	0	0	0.26767	0	0	0	0	0	0	0	0	0.0484346	0	0	0	0	0	0	0	0	0	0	0	0	0	0	0	0	0	0	0	0	0
Marinobacter	0	0	0	0	0	0	0	0	0	0	0	0	0	0	0	0	0	0	0	0	0	0	0	0	0	0	0	0	0	0	0	0	0	0	0.237188	0	0	0	0	0	0	0	0	0	0	0	0	0	0
Marinobacterium	0	0	0	0	0	0.0784331	0	0	0	0	0	0	0	0	0	0	0	0	0	0	0	0	0	0	0	0	0	0	0	0	0	0	0	0	0	0	0	0	0	0	0	0	0	0	0	0	0	0	0
Marinococcus	0	0	0	0	0	0	0	0	0	0	0	0	0	0	0	0	0	0	0	0	0	0	0	0	0	0	0	0	0	0	0	0	0	0	0	0	0	0	0	0	0	0	0	0	0	0	0	0	0
Marinoscillum	0	0	0	0	0	0	0	0	0	0	0	0	0	0	0	0	0	0	0	0	0.0307207	0	0	0	0	0	0.0244083	0.144314	0	0	0	0	0	0	0	0	0	0	0	0.0182336	0	0	0	0	0	0	0	0	0
Marinovum	0	0	0	0	0	0	0	0	0	0	0	0	0	0	0	0	0	0	0	0	0	0	0	0	0	0	0	0	0	0	0	0	0	0	0	0	0	0	0	0	0	0	0	0	0	0	0	0	0
Maripseudobacter	0	0	0	0	0	0	0	0	0	0	0	0	0	0	0	0	0	0	0	0	0	0	0	0	0	0	0	0	0	0	0	0	0	0	0	0	0	0	0	0	0	0	0	0	0	0	0	0	0
Marispirochaeta	0	0	0	0	0	0	0	0.00360756	0	0	0	0	0	0	0	0	0	0	0	0	0	0	0	0	0	0	0	0	0	0	0	0	0	0	0.16572	0	0	0	0	0	0	0	0	0	0	0	0	0	0
Marixanthomonas	0	0	0	0	0	0	0	0	0	0	0	0	0	0	0	0	0	0	0	0	0	0	0	0	0	0	0	0	0	0	0	0	0	0	0	0	0	0	0	0	0	0	0	0	0	0	0.247429	0	0
Marvinbryantia	7.01459	0	0	0.0238325	0	0	0	2.34963	0	0	0	0	0	0	0	0.0797296	0	0	0.647727	0.599646	0.441367	0	0.0537676	0	0	0.0357398	0	0	0.480118	0.356251	0.254636	0	0	0	0	0.0366559	0.0583829	0.405508	0	0	0	0	0	0	0	0	0	0	0
Massilia	0	0	0	0	0	0	0.0386999	0	0	0	0	0	0	0	0	0	0	0	0	0	0	0	0	0	0	0	0	0	0.245241	0.0497221	0	0	0	0	0	0.0179351	0.0422786	0.0598729	0	0	0	0	0	0	0	0	0.0625628	0	0
Massilibacillus	0	0	0	0	0	0	0	0	0	0	0	0	0	0	0	0	0	0	0	0	0	0	0	0	0	0	0	0	0	0	0	0	0	0	0	0	0	0	0	0	0	0	0	0	0	0	0	0	0
Massilibacteroides	0	0.0132746	0	0.0494741	0	0	0	0	0	1.66411	0	0	0	0	0	0	0	0	0	0	3.73679	0	0	0	0	0	0	0	0.12083	0	0	0	0	0	0	0	0	0.361809	0	0	0	0	0	0.810207	0	0	0	0	0
Massilicoli	0.0236665	0	0	0	0	0	0	0	0	0	0	0	0	0	0	0	0	0	0	0	0	0	0	0	0	0	0	0	0	0	0	0	0	0	0	0	0	0	0	0	0	0	0	0	0	0	0	0	0
Massilimaliae	0.0610795	0	0	0	0	0	0	0	0	0	0	0	0	0	0	0.0283678	0	0.247618	2.91593	0	0.0237105	0	1.18642	0	0	0.451874	0	0	1.14733	0.408719	0.0398965	0	0	0	0	0	0	0.891225	0	0	0	0	0	0	0	0	0	0	0
Massilimicrobiota	0	0	0	0	0	0	0	0.637885	0	0	0	0	0	0	0	0	0	0	0	0	0	0	0	0	0	0	0	0	0.0729445	0	0	0	0	0	0	0	0	0	0	0	0	0	0	0	0	0	0	0	0
Massilioclostridium	0	0	0	0	0	0	0	0	0	0	0	0	0	0	0	0	0	0	0	0	0	0	0	0	0	0.0428738	0	0.0225767	0	0	0	0	0	0	0	0	0	6.57574	0	0	0	0	0	0	0	0	0	0	0
Mediterranea	9.94863	0	0	0	0	0	0	0	0	0	0	0	0	0	0	0.30908	0	0	0.515011	0.0177616	0.724922	0	0	0	0	0.027562	0.0193016	0.554935	1.73524	0	0	0	0	0	0.119229	0	0	0.213774	0	0	0	0	0	0	0	0	0	0	0
Mediterraneibacter	0.130605	0	0	0	0	0	0	0.268363	0	0	0	0	0	0	0	0	0	0	0.0466516	0	1.83179	0	0	0	0	0	0	0	0.84617	0.0294023	0	0	0	0	0	0	0	0.410875	0	0	0	0	0	0	0	0	0	0	0
Megamonas	0.971572	0	0	0	0	0	0	0.0647621	0	0	0	0	0	0	0	0	0	0	0	0	0	0	0	0	0	0.0212008	0	0.936633	0	0	0	0	0	0	0	0	0	0	0	0	0	0	0	0	0	0	0	0	0
Megasphaera	0	0	0	0	0	0	0	0	0	0	0	0	0	0	0	0	0	0	0	0	0	0	0	0	0	0	0	0	0	0	0	0	0	0	0	0	0	0	0	0	0	0	0	0	0	0	0	0	0
Meiothermus	0	0	0	0	0	0	0	0.0511911	0	0	0	0	0	0	0	0	0	0	0	0	0.0843307	0	0	0	0	0	0	0	0	0	0	0	0	0	0	0	0	0	0	0	0	0	0	0	0	0	0	0	0
Melghirimyces	0	0	0	0	0	0	0	0	0	0	0	0	0	0	0	0	0	0	0	0	0	0	0	0	0	0	0	0	0	0	0	0	0	0	0	0	0	0	0	0	0	0	0	0	0	0	0	0	0
Melioribacter	0.0112558	0	0	0.0394315	0	0	0	0	0	0	0	0	0	0	0	0	0	0	0	0	0	0	0	0	0	0	0	0	0.0460762	0	0	0	0	0	0	0	0	0	0	0	0	0	0	0	0	0	0	0	0
Melioribacteraceae_norank	0	0	0	0	0	0	0	0	0	0	0	0	0	0	0	0	0	0	0	0	0	0	0	0	0	0	0	0	0	0	0	0	0	0	0	0	0	0	0	0	0	0	0	0	0	0	0	0	0
Melissococcus	0	0	0	0	0	0	0	0	0	0	0	0	0	0	0	0	0	0	0	0	0	0	0	0	0	0	0	0	0	0	0	0	0	0	0	0	0	0	0	0	0	0	0	0	0	0	0	0	0
Melittangium	0	0	0	0	0	0	0	0	0	0	0	0	0	0	0	0	0	0	0	0	0	0	0	0	0	0	0	0	0	0	0	0	0	0	0	0	0	0	0	0	0	0	0	0	0	0	0	0	0
Merdibacter	0	0	0	0	0	0	0	0.563781	0	0	0	0	0	0	0	0	0	0	0	0	0	0	0	0	0	0	0	0	0	0	0	0	0	0	0	0	0	0	0	0	0	0	0	0	0	0	0	0	0
Merdimonas	1.24753	0	0	0	0	0	0	0	0	0	0	0	0	0	0	0	0	0	0	0	0	0	0	0	0	0	0	0	0	0	0	0	0	0	0	0	0	0	0	0	0	0	0	0	0	0	0	0	0
Merulinidae	0	0	0	0	0	0	0	0	0	0	0	0	0	0	0	0	0	0	0.155546	0	0	0	0	0	0	0	0	0	0	0	0	0	0	0	0	0	0	0	0	0	0	0	0	0	0	0	0	0	0
Mesoaciditoga	0	0	0	0	0	0	0	0.172922	0	0	0	0	0	0	0	0	0	0	0	0	0	0	0.0163858	0	0	0	0	0	0.0462803	0	0	0	0	0	0	0	0	0	0	0	0	0	0	0	0	0	0	0	0
Mesonia	0	0	0	0	0	0	0	0	0	0	0	0	0	0	0	0	0	0	0	0	0	0	0	0	0	0	0	0	0	0	0	0	0	0	0	0	0	0	0	0	0	0	0	0	0	0	0	0	0
Mesoplasma	0	0	0	0	0	0	0	0	0	0	0	0	0	0	0	0	0	0	0	0	0	0	0	0	0	0	0	0	0	0	0	0	0	0	0	0	0	0	0	0	0	0	0	0	0	0	0	0	0
Mesorhizobium	0.0588654	0.0107739	0	0.0844777	0	0	0.104656	0.140686	0	0	0	0	0	0	0	0	0	0	0	0	0.00636212	0	0	0	0	0	0	0.160942	0	0	0.0870386	0	0	0	0	0	0	0	0	0	0	0	0	0	0	0	0	0	0.115257
Mesosutterella	0	0	0	0	0	0	0	0	0	0	0	0	0	0	0	0	0	0	0	0	0	0	0	0	0	0	0	0	0	0	0	0	0	0	0	0	0	0	0	0	0	0	0	0	0	0	0	0	0
Mesotoga	0.0165762	0	0	0	0	0	0	0	0	0	0	0	0	0	0	0	0	0	0	0	0	0	0	0	0	0	0	0	0	0	0	0	0	0	0	0	0	0	0	0	0	0	0	0	0	0	0	0	1.08487
Methanobacterium	0	0	0	0	0	0	0	0	0	0	0	0	0	0	0	0.239036	0	0	0	0	0	0	0	0	0	0	0	0	0	0	0	0	0	0	0	0	0	0	0	0	0	0	0	0	0	0	0	0	0
Methanobrevibacter	0.0227397	0	0	0.0724655	0	0	0	0	0	0	0	0	0	0	0	0.45614	0	0	0	0	0	0	0	0	0	0	0	0.585966	0	0	0.545939	0	0	0	0.0439501	0.543419	0	0	0	0	0	0	0	0	0	0	0	0	0
Methanoculleus	0	0	0	0	0	0	0	0	0	0	0	0	0	0	0	0	0	0	0	0	0	0	0	0	0	0	0	0	0	0	0	0	0	0	0	0	0	0	0	0	0	0	0	0	0	0	0	0	0
Methanomassiliicoccus	0	0	0	0	0	0	0	0	0.0886803	0	0	0	0	0	0	0	0	0	0	0	0	0	0	0	0	0	0	0	0	0	0	0	0	0	0	0	0	0	0	0	0	0	0	0	0	0	0	0	0
Methanomicrobia_norank	0	0	0	0	0	0	0	0	0	0	0	0	0	0	0	0	0	0	0	0	0	0	0	0	0	0	0	0	0.104658	0	0	0	0	0	0	0	0.196823	0	0	0	0	0	0	0	0	0	0	0	0
Methanosarcina	0	0	0	0	0	0	0	0	0	0	0	0	0	0	0	0	0	0	0	0	0	0	0	0	0	0	0	0	0	0	0	0	0	0	0	0	0	0	0	0	0	0	0	0	0	0	0	0	0
Methanosarcinales_norank	0	0	0	0	0	0	0	0	0	0	0	0	0	0	0	0	0	0	0	0	0	0	0	0	0	0	0	0	0	0	0	0	0	0	0	0	0	0	0	0	0	0	0	0	0	0	0	0	0
Methanosphaera	0	0	0	0	0	0	0	0	0	0	0	0	0	0	0	0	0	0	0	0	0	0	0	0	0	0	0	0	0	0	0	0	0	0	0	0	0	0	0	0	0	0	0	0	0	0	0	0	0
Methylicorpusculum	0	0	0	0	0	0	0	0	0	0	0	0	0	0	0	0	0	0	0	0	0	0	0	0	0	0	0.00437044	0	0	0	0	0	0	0	0	0	0	0	0	0	0	0	0	0	0	0	0	0	0
Methylobacterium	0	0	0	0	0	0	0	0	0	0	0	0	0	0	0	0	0	0	0	0	0	0	0	0	0	0	0.0357558	0.0141216	0	0	0	0	0	0	0	0	0	0	0	0	0	0	0	0	0	0	0	0	0
Methylocella	0	0	0	0	0	0	0	0	0	0	0	0	0	0	0	0	0	0	0	0	0	0	0	0	0	0	0	0.0170256	0	0	0	0	0	0	0	0	0	0	0	0	0	0	0	0	0	0	0	0	0
Methylomicrobium	0	0	0	0	0	0	0	0	0	0	0	0	0	0	0	0	0	0	0	0	0	0	0	0	0	0	0	0	0	0	0	0	0	0	0	0	0	0	0	0	0	0	0	0	0	0	0	0	0
Methylomonas	0	0	0	0.0550684	0	0	0	0	0	0	0	0	0	0	0	0	0	0	0	0	0	0	0	0	0	0	0.186606	0	0	0	0	0	0	0	0	0	0	0	0	0	0	0	0	0	0	0	0	0	0
Methylomusa	0	0	0	0	0	0	0	0	0	0	0	0	0	0	0	0	0	0	0	0	0	0	0	0	0	0	0	0	0	0	0	0	0	0	0	0	0	0	0	0	0	0	0	0	0	0	0	0	0
Methylophilus	0	0	0	0	0	0	0	0	0	0	0	0	0	0	0	0	0	0	0	0	0	0	0	0	0	0	0	0	0	0	0	0	0	0	0	0	0	0	0	0	0	0	0	0.0344241	0	0	0	0	0
Methylopila	0	0	0	0	0	0	0	0	0	0	0	0	0	0	0	0	0	0	0	0	0	0	0	0	0	0	0	0	0	0	0	0	0	0	0	0	0	0	0	0	0	0	0	0	0	0	0	0	0
Methylovirgula	0	0	0	0	0	0	0	0	0	0	0	0	0	0	0	0	0	0	0	0	0	0	0	0	0	0	0	0	0	0	0	0	0	0	0	0	0	0	0	0	0	0	0	0	0	0	0	0	0
Metschnikowiaceae	0.0102892	0	0	0	0	0	0	0	0	0	0	0	0	0	0	0	0	0	0	0	0	0	0	0	0	0	0	0	0	0	0	0	0	0	0	0	0	0	0	0	0	0	0	0	0	0	0	0	0
Micavibrio	0	0	0	0	0	0	0	0	0	0	0	0	0	0	0	0	0	0	0	0	0	0	0	0	0	0	0	0	0	0	0	0	0	0	0	0	0	0	0	0	0	0	0	0	0	0	0	0	0
Microbacteriaceae_norank	0.044259	0	0	0.444718	0	0	0	0	0	0	0	0	0	0	0	0	0	0	0	0	0	0	0	0	0	0	0.12315	0	0	0	0	0	0	0	0	0	0	0	0	0	0	0	0	0	0	0	0	0	0
Microbacterium	0.270063	0.589366	0	0.070445	0	0	0	0.0835106	0	0	0	0	0	0	0	0	0	0	0.0569624	0.0355642	0.359045	0	0.0368844	0	0	0	0.0387658	0.0656407	0.018251	0.167211	0.355262	0	0	0	0	0.0260551	0	0.0196803	0	0	0	0	0	0	0	0	0	0	0
Microbispora	0	0	0	0	0	0	0	0	0	0	0	0	0	0	0	0	0	0	0	0	0	0	0	0.0266411	0	0	0	0	0.0703624	0	0	0	0	0	0	0	0	0	0	0	0	0	0	0.0485406	0	0	0	0	0
Microbulbifer	0	0	0	0.0780774	0	0	0	0	0	0	0	0	0	0	0	0	0	0	0	0	0	0	0	0	0	0	0	0	0	0	0	0	0	0	0	0	0	0	0	0.016914	0	0	0	0	0	0	0.0505823	0	0
Micrococcales_norank	0	0	0	0	0	0	0	0	0	0	0	0	0	0	0	0	0	0	0	0	0	0	0	0	0	0	0	0	0	0	0	0	0	0	0	0	0	0.00929356	0	0	0	0	0	0	0	0	0	0	0
Microcystis	0	0	0	0	0	0	0	0	0	0	0	0	0	0	0	0	0	0	0	0	0	0	0	0	0	0	0	0	0	0	0	0	0	0	0	0	0	0	0	0	0	0	0	0	0	0	0	0	0
Microlunatus	0.0161975	0	0	0	0	0	0	0	0	0	0	0	0	0	0	0	0	0	0	0	0	0	0	0	0	0	0	0	0	0	0	0	0	0.0274136	0	0	0	0	0	0	0	0	0	0	0	0	0	0	0
Micromonospora	0	0	0	0	0	0	0	0	0	0	0	0.0148607	0.103114	0	0	0	0	0	0	0	0.142726	0	0	0	0	0	0.0686315	0	0	0	0	0	0	0	0	0.0113859	0	0.0293148	0	0	0	0	0	0.164424	0	0	0	0	0
Micromonosporaceae_norank	0	0	0	0	0	0	0	0	0	0	0	0	0	0	0	0	0	0	0	0	0	0	0	0	0	0	0	0	0	0	0	0	0	0	0.0509029	0	0	0	0	0	0	0	0	0	0	0	0	0	0
Microstromatales_norank	0	0	0	0	0	0	0	0	0	0	0	0	0	0	0	0	0	0	0	0	0	0	0	0	0	0	0	0	0	0	0	0	0	0	0	0	0	0	0	0	0	0	0	0	0	0	0	0	0
Microterricola	0	0	0	0	0	0	0	0	0	0	0	0	0	0	0	0	0	0	0	0	0	0	0	0	0	0	0	0	0	0	0	0	0	0	0	0.0194091	0	0	0	0	0	0	0	0	0	0	0	0	0
Microvirga	0	0	0	0	0	0	0	0	0	0	0	0	0	0	0	0	0	0	0	0	0	0	0	0	0.120332	0	0	0	0	0	0	0	0	0	0.0290251	0	0	0	0	0	0	0	0	0	0	0	0	0	0
Microviridae_norank	0	0	0	0	0	0	0	0	0	0	0	0	0	0	0	0	0	0	0	0	0	0	0	0	0	0	0	0	0	0	0	0	0	0	0	0	0	0	0	0	0	0	0	0	0	0	0	0	0
Millionella	0.106755	1.97478	0	0	0	0	0	0	0	0	0	0	0	0	0	0.0799849	0	0	0	0.467077	0.073955	0	0	0	0.692946	0	0.395641	0	0	0	0	0	0	0	0	0	0	0.71809	0	0	0	0	0	0	0	0	0	0	0
Miridae	0	0	0	0	0	0	0	0	0	0	0	0	0	0	0	0	0	0	0.0419064	0	0	0	0	0	0	0	0	0	0	0	0	0	0	0	0	0	0	0	0	0	0	0	0	0	0	0	0	0	0
Mitsuaria	0	0	0	0	0	0	0	0	0	0	0	0	0	0	0	0	0	0	0	0	0	0	0	0	0	0	0	0	0.0208748	0	0	0	0	0	0	0	0	0	0	0	0	0	0	0	0	0	0	0	0
Mitsuokella	0.0549334	0	0	0	0	0.0781521	0	0	0	0	0	0	0	0	0	0	0	0	0	0	0	0	0	0	0	0	0	0	0.0289177	0	0.0107458	0	0	0	0	0	0	0	0	0	0	0	0	0	0	0	0	0	0
Mobilibacterium	0	0	0	0	0	0	0	0	0	0	0	0	0	0	0	0	0	0	0	0	0	0	0	0	0	0	0	0	0	0	0	0	0	0	0	0	0	0	0	0	0	0	0	0	0	0	0	0	0
Mobilisporobacter	0.0884606	1.07266	0	0	0	0	0.0402209	0.109644	0	0	0	0	0	0	0	0.0398877	0	0	0.249534	0	0	0	0	0	0	0	0	0.513923	0.0572718	0	0	0	0	0	0	0	0.0407559	0	0	0	0	0	0	7.28755	0	0	0	0	0
Mobiluncus	0	0	0	0	0	0	0	0	0	0	0	0	0	0	0	0	0	0	0	0	0	0	0	0	0	0	0	0	0	0	0	0	0	0	0	0	0	0	0	0	0	0	0	0	0	0	0	0	0
Moellerella	0	0	0	0	0	0	0	0	0	0	0	0	0	0	0	0	0	0	0	0	0	0	0	0	0	0	0	0	0	0	0	0	0	0	0	0	0	0	0	0	0	0	0	0	0	0	0	0	0
Mogibacterium	0	0	0	0	0	0	0	0	0.0626097	0	0	0	0	0	0	0	0	0	0	0	0	0	0	0	0	0	0	0.0107429	0	0	0	0	0	0	0	0	0	0	0	0	0	0	0	0	0	0	0	0	0
Moneuplotes	0	0	0	0	0	0	0	0	0	0	0	0	0	0	0	0	0	0	0	0	0	0	0	0	0	0	0	0	0	0	0	0	0	0	0	0	0	0	0	0	0	0	0	0	0	0	0	0	0
Mongoliibacter	0	0	0	0	0	0	0	0	0	0	0	0	0	0	0	0	0	0	0	0	0	0	0	0	0	0	0	0	0	0	0	0	0	0	0	0	0	0	0	0	0	0	0	0	0	0	0	0	0
Monoglobus	0	0	0	0.134914	0	0	0	0	0	0	0	0	0	0	0	0	0	0	0	0	0.0385586	0	0	0	0	0	0	0.115026	0.0392769	0	0	0	0	0	0	0.0397256	0	0	0	0	0	0	0	0	0	0	0	0	0
Moorella	0	0	0	0	0	0	0	0	0	0	0	0	0	0	0	0	0	0	0	0	0	0	0	0	0	0	0	0	0	0	0	0	0	0	0	0	0	0	0	0	0	0	0	0	0	0	0	0	0
Moraxella	0	0	0	0	0	0	0	0	0	0	0	0	0	0	0	0	0	0	0	0	0	0	0	0	0	0	0	0	0	0	0	0	0	0	0	0	0	0	0	0	0	0	0	0	0	0	0	0	0
Mordavella	0	0	0	0	0	0	0	0	0	0	0	0	0	0	0	0	0	0	0	0	0	0	0	0	0	0	0	0	0	0	0	0	0	0	0	0	0	0	0	0	0	0	0	0	0	0	0	0	0
Motilimonas	0	0	0	0	0	0	0	0	0	0	0	0	0	0	0	0	0	0	0	0	0	0	0	0	0	0	0	0	0	0	0	0	0	0	0	0	0	0	0	0	0	0	0	0	0	0	0	0	0
Mucilaginibacter	0.293148	0.274589	0	0.213571	0	0	0	0	0.0449998	0.0356401	0	0.0820892	0	0	0	0.0124361	0	0.0433099	0	0.381404	1.94466	0	0.130482	0	0.0744158	4.10172	0	0	2.22428	0.110835	0	0	0	0	0	2.04935	6.51921	6.52376	0	0	0	0	0	0.00519819	0	0	0	0	0.0303571
Mucinivorans	0	0	0	0	0	0	0	0	0	0	0	0	0	0	0	0	0	0	0	0	0	0	0	0	0	0	0	1.0259	0.0175722	0	0	0	0	0	0	0	0	0	0	0	0	0	0	0	0	0	0	0	0
Mucispirillum	0	0	0	0	0	0	0	0	0	0	0	0	0	0	0	0	0	0	0	0	0	0	0	0	0	0	0	0	0	0	0	0	0	0	0	0	0	0	0	0	0	0	0	0	0	0	0	0	0
Mucoraceae	0	0	0	0	0	0	0	0	0	0	0	0	0	0	0	0	0	0	0	0	0	0	0	0	0	0	0	0	0	0	0	0	0	0	0	0	0	0	0	0	0	0	0	0	0	0	0	0	0
Mumia	0	0	0	0	0	0	0	0	0	0	0	0	0	0	0	0	0	0	0	0	0	0	0	0	0	0	0	0	0	0	0	0	0	0	0	0	0	0.0223194	0	0	0	0	0	0	0	0	0	0	0
Murdochiella	0	0	0	0	0	0	0	0	0	0	0	0	0	0	0	0	0	0	0	0	0	0	0	0	0	0	0	0	0	0	0	0	0	0	0	0	0	0	0	0	0	0	0	0	0	0	0	0	0
Muribaculaceae_norank	23.1726	1.64503	0	9.06639	0	0	0.232936	0	0	3.19052	0	0.980899	0	0.953628	0	0	0	0.0739563	1.62926	0.16506	31.2116	0	1.53196	0	0	12.5478	0.137215	4.68371	24.9746	0	0.0308168	0	0	0	1.45797	3.10042	1.94935	13.9583	0	0	0	0	0	0	0	0.0446564	0	0	0
Muribaculum	5.87254	0	0	0	0	0	0	0	0	12.6417	0	0	0	0	0	0	0	0	1.61571	0	3.21767	0	2.68843	0	0	0	0	0	1.40789	0	0	0	0	0	0.640597	0	0	0.0143936	0	0	0	0	0	0	0	0	0	0	0
Muricauda	0.251241	0	0	0.013775	0	0	0	0	0	0.0930109	0	0	0	0	0	0	0	0	0.116159	0	0.038544	0	0	0	0	0	0	0	0	0	0	0	0	0	0.0813969	0	0	0.0440982	0	0	0	0	0	0	0	0	0	0	0
Muricomes	0	0	0	0	0	0	0	0	0	0	0	0	0	0	0	0	0	0	0.214808	0	0.0244386	0	0	0	0	0	0	0	0	0	0	0	0	0	0	0	0	1.0196	0	0	0	0	0	0	0	0	0	0	0
Murimonas	9.80703	0	0	0.0128427	0	0	0	1.32854	0.0593449	0	0	0	0.195768	0.0274636	0	0	0	0	0.07167	0	1.61618	0	0.0536924	0	0.567173	0	0	0	1.34511	0.153499	0.171547	0	0	0	0.977947	0	0	1.59451	0	0	0	0	0	0	0	0	0	0	0
Murinocardiopsis	0	0	0	0	0	0	0	0	0	0	0	0	0	0	0	0	0	0	0	0	0	0	0	0	0	0	0	0	0	0	0	0	0	0	0	0	0	0	0	0	0	0	0	0	0	0	0	0	0
Mycetocola	0	0	0	0	0	0	0	0	0	0	0	0	0	0	0	0	0	0	0	0	0	0	0	0	0	0	0	0.0383377	0	0.0377847	0	0	0	0	0	0	0	0	0	0	0	0	0	0	0	0	0	0	0
Mycobacterium	0	0	0	0.0185391	0	0	0	0	0	0	0	0	0	0	0	0	0	0	0	0	0	0	0	0	0	0	0	0	0	0.0610028	0	0	0	0	0	0	0	0.123684	0	0	0	0	0	0	0	0	0	0	0
Mycobacteroides	0.0388648	0	0	0	0	0	0	0	0	0	0	0	0	0	0	0	0	0	0	0	0	0	0	0	0	0	0	0	0	0	0	0	0	0	0	0.0435599	0.0777418	0.0937618	0	0	0	0	0	0	0	0	0	0	0
Mycolicibacterium	0.0423056	0	0	0.0795459	0	0	0	0.0495646	0	0	0	0	0	0	0	0	0	0	0	0	0	0	0	0	0	0	0	0.103064	0	0.0600824	0	0	0	0	0	0	0	0	0	0	0	0	0	0	0	0	0	0	0
Mycoplasma	16.5727	0	0	0.329927	0	0	1.30319	0	0	4.28107	0	0	0	0	0	0	0	0	18.9829	0	0	0	0	0	0	0	0	0.308205	0	0	0	0	0	0.0897449	0	0	0	0	0	0	0	0	0	0	0	0	0.320288	0	0.285619
Mycosphaerellaceae	0	0	0	0	0	0	0	0	0	0	0	0	0	0	0	0	0	0	0	0	0	0	0	0	0	0	0	0.0504456	0	0	0	0	0	0	0	0	0	0	0	0	0	0	0	0	0	0	0	0	0
Myoviridae_norank	0	0	0	0	0	0	0	0	0	0	0	0	0	0	0	0	0	0	0	0	0	0	0	0	0	0	0	0	0	0	0	0	0	0	0	0	0	0	0	0	0	0	0	0	0	0	0	0	0
Myrtaceae	0	0	0	0	0	0	0	0	0	0	0	0	0	0	0	0	0	0	0	0	0	0	0	0	0	0	0	0	0	0	0	0	0	0	0	0	0	0	0	0	0	0	0	0	0	0	0	0	0
Mytilinidiaceae	0	0	0	0	0	0	0	0	0	0	0	0	0	0	0	0	0	0	0	0	0	0	0	0	0	0	0	0	0	0	0	0	0	0	0	0	0	0.0302981	0	0	0	0	0	0	0	0	0	0	0
Myxococcales_norank	0	0	0	0.0347546	0	0	0	0	0	0	0	0.105133	0	0	0	0	0	0	0	0	0.073167	0	0	0	0	0	0	0	0	0	0	0	0	0	0	0	0	0.325791	0	0	0	0	0	0	0	0	0	0	0
Naegleria	0	0	0	0	0	0	0	0	0	0	0	0	0	0	0	0	0	0	1.67057	0	0	0	0	0	0	0	0.0627465	0	0	0	0	0	0	0	0	0	0	0	0	0	0	0	0	0	0	0	0	0	0
Nafulsella	0	0	0	0	0	0	0	0	0	0	0	0	0	0	0	0	0	0	0	0	0	0	0	0	0	0	0	0.0612567	0	0	0	0	0	0	0	0	0	0	0	0	0	0	0	0	0	0	0	0	0
Nakamurella	0	0	0	0	0	0	0	0	0	0	0	0	0	0	0	0	0	0	0	0	0	0	0	0	0	0	0	0	0	0	0	0	0	0	0	0.0628259	0	0	0	0	0	0	0	0	0	0	0	0	0
Natranaerovirga	0.146428	0	0	0.181841	0	0	0	0	0	0	0	0	0	0	0	0	0	0	0	0	0.0165226	0	0	0	0	0	0	0	0.113594	0	0	0	0	0	0.690945	0.220321	0	0	0	0	0	0	0	0	0	0	0	0	0
Natrialba	0	0	0	0	0	0	0	0	0	0	0	0	0	0	0	0	0	0	0	0	0	0	0	0	0	0	0	0	0	0	0	0	0	0	0	0	0	0	0	0	0	0	0	0	0	0	0	0	0
Natronincola	0	0	0	0	0	0	0.0645696	0	0	0	0	0	0	0	0	0	0	0	0.0192103	0	0	0	0	0	0	0	0	0	0	0	0	0	0	0	0	0	0	0	0	0	0	0	0	0	0	0	0	0	0
Natronococcus	0	0	0	0	0	0	0	0	0	0	0	0	0	0	0	0	0	0	0	0	0	0	0	0	0	0	0	0	0	0	0	0	0	0	0	0	0	0	0	0	0	0	0	0	0	0	0	0	0
Natronoflexus	0	0	0	0.198757	0	0	0	0	0	0	0	0	0	0	0	0	0	0	0	0	0.614731	0	0	0	0	0	0	0	0	0	0	0	0	0	0	0	0	0	0	0	0	0	0	0	0	0	0	0	0
Natronohydrobacter	0	0	0	0	0	0	0	0	0	0	0	0	0	0	0	0	0	0	0	0	0.0172506	0	0	0	0	0	0	0	0	0	0	0	0	0	0	0	0	0	0	0	0	0	0	0	0	0	0	0	0
Nectriaceae	0	0	0	0	0	0	0	0	0	0	0	0	0	0	0	0	0	0	0	0	0	0	0	0	0	0	0.0169149	0	0	0	0	0	0	0	0	0	0	0	0	0	0	0	0	0	0	0	0	0	0
Negadavirga	0	0	0	0	0	0	0	0	0	0	0	0	0	0	0	0	0	0	0	0	0	0	0	0	0	0	0	0	0	0	0	0	0	0	0	0	0	0.0140706	0	0	0	0	0	0	0	0	0	0	0
Negativibacillus	0	0	0	0	0	0	0	0	0	0	0	0	0	0	0	0	0	0	0	0.577646	0	0	0	0	0	0	0	0	0	0	0	0	0	0	0	0	0	0	0	0	0	0	0	0	0	0	0	0	0
Negativicoccus	0	0	0	0	0	0	0	0	0	0	0	0	0	0	0	0	0	0	0	0	0	0	0	0	0	0	0	0	0	0	0	0	0	0	0.0318842	0	0	0	0	0	0	0	0	0	0	0	0	0	0
Negativicutes_norank	0	0	0	0	0	0	0	0	0	0	0	0	0	0	0	0	0	0	0	0.269396	0	0	0	0	0	0	0	0	0	0	0	0	0	0	0	0	0	0	0	0	0	0	0	0	0	0	0	0	0
Neglecta	9.3209	0.63827	0	0.510699	0	0	0	0	0	0	0	0	0	0.533241	0	0	0	0.471401	0.56795	0.0555156	0.323681	0	1.03989	0	0.157038	0.841465	0	0	0.745727	2.16011	0.185281	0	0	0	0.0451825	0.156347	0	0.510864	0	0	0	0	0	0.0637458	0	0	0	0	0
Neiella	0	0	0	0	0	0	0	0	0	0	0	0	0	0	0	0	0	0	0	0	0	0	0	0	0	0	0	0.0262924	0	0	0	0	0	0	0	0	0	0	0	0	0	0	0	0	0	0	0	0	0
Neisseria	0	0	0	0	0	0	0	0	0	0	0	0	0	0	0	0	0	0	0	0	0	0	0	0	0	0	0	0	0	0	0	0	0	0	0	0	0	0	0	0	0	0	0	0	0	0	0	0	0
Neisseriaceae_norank	0	0	0	0	0	0	0	0	0	0	0	0	0	0	0	0	0	0	0	0	0	0	0	0	0	0	0	0	0	0	0	0	0	0	0	0	0	0	0	0	0	0	0	0	0	0	0	0	0
Neisseriales_norank	0	0	0	0	0	0	0	0	0	0	0	0	0	0	0	0	0	0	0	0	0	0	0	0	0	0	0	0	0	0	0	0	0	0	0	0	0	0	0	0	0	0	0	0	0	0	0	0	0
Neobittarella	0	0	0	0	0	0	0	0	0	0	0	0	0	0	0	0	0	0	0	0	0	0	0	0	0	0	0	0	0	0	0	0	0	0	0	0	0	0	0	0	0	0	0	0	0	0	0	0	0
Neocallimastigaceae	52.6425	9.38504	0.227742	12.383	0.665574	57.1027	0	0.25985	2.50401	0.14132	8.74458	5.64857	0	0.808688	0	3.76062	0	0	0.231108	0	5.08084	0	0	0	0	0	0	3.58912	0.0315307	10.2474	0	0	0	0	0.355524	0.24806	1.61831	1.4824	0	0	0	0	0	0	0.0551462	0	0	0	0
Nephromyces	0	0	0	0	0	0	0	0	0	0	0	0	0	0	0	0	0	0	0	0	0	0	0	0	0	0	0	0.21733	0	0	0	0	0	0	0	0	0	0	0	0	0	0	0	0	0	0	0	0	0
Nephtheidae	0	0	0	0	0	0	0	0	0	0	0	0	0	0	0	0	0	0	9.01868	0	0	0	0	0	0	0	0	0	0	0	0	0	0	0	0	0	0	0	0	0	0	0	0	0	0	0	0	0	0
Nesterenkonia	0	0	0	0	0	0	0	0	0	0	0	0	0	0	0	0	0	0	0	0	0.0139837	0	0	0	0	0	0	0	0	0	0	0	0	0	0	0	0	0	0	0	0	0	0	0	0	0	0	0	0
Niabella	0.10714	0.162445	0	0	0	0	0	0	0	0	0	0	0	0	0	0	0	0	0	0	9.93518	0	0	0	0	0	0.286232	0	0.355882	0	0	0	0	0.0802276	0.0778889	0	0	0.897309	0	0	0	0	0	0	0	0	0	0	0
Niameybacter	0.0252874	0.299354	0	0.147678	0	0	0.218772	1.25572	0	0	0	0	0	0	0	0	0	0	0	0	0	0	0	0	0	0	0	0	3.27816	5.41149	0	0	0	0	0	0	0	0	0	0	0	0	0	0	0	0	0	0	0
Niastella	0.0533348	0	0	0.0845127	0	0	0	0	0	0	0	0	0	0	0	0	0	0	0.104181	0	0.146879	0.108351	0.0408468	0	0	0	0	0	0.319497	0.109153	0	0	0	0	0.0489695	0	0	0.0718806	0	0.0311406	0	0	0	0	0	0	0	0	0
Nibricoccus	0	0	0	0	0	0	0	0	0	0	0	0	0	0	0	0	0	0	0	0	0	0	0	0	0	0	0.0297302	0	0	0	0	0	0	0	0	0.0105322	0	0	0	0	0	0	0	0	0	0	0	0	0
Niphatidae	0	0	0	0	0	0	0	0	0	0	0	0	0	0	0	0	0	0	0	0	0	0	0	0	0	0	0	0	0	0	0	0	0	0	0	0	0	0	0	0	0	0	0	0	0	0	0	0	0
Nitriliruptor	0	0	0	0	0	0	0	0	0	0	0	0	0	0	0	0	0	0	0	0	0	0	0	0	0	0	0	0	0	0	0	0	0	0	0	0	0	0	0	0	0	0	0	0	0	0	0	0	0
Nitrincola	0	0	0	0	0	0	0	0	0	0	0	0	0	0	0	0	0	0	0	0	0	0	0	0	0	0	0	0	0	0	0	0	0	0	0	0	0	0	0	0	0	0	0	0	0	0	0	0	0
Nitrolancea	0	0	0	0	0	0	0	0	0	0	0	0	0	0	0	0	0	0	0	0	0	0	0	0	0	0	0	0	0	0.0215046	0	0	0	0	0	0	0	0.430054	0	0	0	0	0	0	0	0	0	0	0
Nitrosomonadales_norank	0.0133961	0	0	0	0	0	0	0	0	0	0	0	0	0	0	0	0	0	0	0	0	0	0	0	0	0	0	0	0	0	0	0	0	0	0	0	0	0	0	0	0	0	0	0	0	0	0	0	0
Nitrosomonas	0	0	0	0	0	0	0	0	0	0	0	0	0	0	0	0	0	0	0	0	0	0	0	0	0	0	0	0	0	0	0	0	0	0	0	0	0	0	0	0	0	0	0	0	0	0	0	0	0
Nitrospinae_norank	0	0	0	0	0	0	0	0	0	0	0	0	0	0	0	0	0	0	0	0	0	0	0	0	0	0	0	0	0	0	0	0	0	0	0	0	0	0	0	0	0	0	0	0	0	0	0	0	0
Nitrospira	0.0198979	0	0	0	0	0	0	0	0	0	0	0	0	0	0	0	0	0	0	0	0	0	0	0	0	0	0.101112	0	0	0	0	0	0	0	0	0	0	0	0	0	0	0	0	0	0	0	0	0	0
Nitrospiraceae_norank	0	0	0	0	0	0	0	0	0	0	0	0	0	0	0	0	0	0	0	0	0	0	0	0	0	0	0	0	0	0	0	0	0	0	0	0	0	0	0	0	0	0	0	0	0	0	0	0	0
Nitrospirae_norank	0.0109756	0	0	0	0	0	0	0	0	0	0	0	0	0	0	0	0	0	0	0	0	0	0	0	0	0	0	0	0	0	0	0	0	0	0	0	0	0	0	0	0	0	0	0	0	0	0	0	0
Nitrospirillum	0	0	0	0.192735	0	0	0	0	0	0	0	0	0	0	0	0	0	0	0	0	0	0	0	0	0	0	0	0	0.0172163	0	0	0	0	0	0	0	0	0.0107915	0	0	0	0	0	0	0	0	0	0	0
Nitunavirus	0	0	0	0	0	0	0	0	0	0	0	0	0	0	0	0	0	0	0	0	0	0	0	0	0	0	0	0	0	0	0	0	0	0	0	0	0	0	0	0	0	0	0	0	0	0	0	0	0
Nocardia	0	0	0	0	0	0	0	0	0	0	0	0	0	0	0	0	0	0	0	0	0	0	0	0	0	0	0	0	0	0.105149	0.0209776	0	0	0	0	0	0	0	0	0	0	0	0	0	0	0	0	0	0
Nocardioides	0	0	0	0	0	0	0	0	0	0	0	0	0	0	0	0	0	0	0	0	0	0	0	0	0	0	0	0	0	0	0	0	0	0	0	0	0	0	0	0	0	0	0	0	0	0	0	0	0
Nocardiopsis	0.0396287	0	0	0	0	0	0	0.0124671	0	0	0	0	0	0	0	0	0	0	0	0	0.0349373	0	0	0	0	0	0	0.0368862	0	0	0	0	0	0	0	0	0	0.0479581	0	0	0	0	0	0	0	0	0	0	0
Noctuidae	0	0	0	0	0	0	0	0.0650226	0	0	0	0	0	0	0	0	0	0	0	0	0	0	0	0	0	0	0	0	0	0	0	0	0	0	0	0	0	0	0	0	0	0	0	0	0	0	0	0	0
Nonlabens	0	0	0	0	0	0	0	0	0	0	0	0	0	0	0	0	0	0	0	0	0	0	0	0	0	0	0	0.0862544	0	0	0	0	0	0	0	0	0.0160019	0	0	0	0.0106609	0	0	0	0	0	0	0	0
Nonomuraea	0	0	0	0	0	0	0	0	0	0	0	0	0	0	0	0	0	0	0.0262245	0	0.230792	0	0	0	0	0	0.111596	0	0	0	0	0	0	0	0	0	0	0	0	0	0	0	0	0	0	0	0	0	0
Nostoc	0	0	0	0	0	0	0	0	0	0	0	0	0	0	0	0	0	0	0	0	0	0	0	0	0	0	0	0	0	0	0	0	0	0	0	0	0	0	0	0	0	0	0	0	0	0	0.0646352	0	0
Nothophytophthora	0	0	0	0	0	0	0	0	0	0	0	0	0	0	0	0	0	0	0.21588	0	0	0	0	0	0	0	0	0	0	0	0	0	0	0	0	0	0	0	0	0	0	0	0	0	0	0	0	0	0
Novibacillus	0	0	0	0	0	0	0	0	0	0	0	0	0	0	0	0.0164872	0	0	0	0	0	0	0.222166	0	0	0	0	0	0.197548	0	0	0	0	0	0	0	0	0.498723	0	0	0	0	0	0	0	0	0	0	0
Noviherbaspirillum	0	0	0	0	0	0	0	0	0	0	0	0	0	0	0	0	0	0	0	0	0	0	0	0	0	0	0	0	0	0	0	0	0	0	0	0	0	0	0	0	0	0	0	0	0	0	0	0	0
Novispirillum	0	0	0	0	0	0	0	0	0	0	0	0	0	0	0	0	0	0	0	0	0	0	0	0	0	0	0	0	0	0	0	0	0	0	0	0	0	0	0	0	0	0	0	0	0	0	0	0	0
Novosphingobium	0	0	0	0	0	0	0	0	0	0	0	0	0	0	0	0	0	0	0	0	0.0339518	0	0	0	0	0	0	0	0	0	0	0	0	0	0	0.0173622	0	0	0	0	0	0	0	0	0	0	0	0	0
Nubsella	0	0	0	0	0	0	0	0	0	0	0	0	0	0	0	0	0	0	0	0	0	0	0	0	0	0	0	0	0	0	0	0	0	0	0	0	0	0	0	0	0	0	0	0	0	0	0	0	0
NULL-Domain_Unclassified	0.463973	1.64894	0	11.2223	0	0.45253	0.0147973	0.0208716	13.5919	1.96003	1.03554	0	0	0	0.862598	0.560783	0	0.0145989	0.106852	0	3.16763	0	0.316385	0	0.157334	0	4.13485	13.1244	0.0527986	2.01996	1.17784	0	0	2.16164	0.07659	4.32993	0.227994	0.420727	0.862598	0.584418	0.0225649	0.116045	0	0.170279	0	0.136454	16.8496	0	0
Numididae	0	0	0	0	0	0	0	0	0	0	0	0	0	0	0	0	0	0	0.427149	0	0	0	0	0	0	0	0	0	0	0	0	0	0	0	0	0	0	0	0	0	0	0	0	0	0	0	0	0	0
Numidum	0	0	0	0	0	0	0	0	0	0	0	0	0	0	0	0	0	0	0	0	0	0	0	0	0	0	0	0	0	0	0	0	0	0	0	0	0	0	0	0	0	0	0	0	0	0	0	0	0
Nyctotherus	0	0	0	0	0	0	0	0	0	0	0	0	0	0	0	0	0	0	0	0	0	0	0	0	0	0	0	0	0	0	0	0	0	0	0	0	0	0	0	0	0	0	0	0	0	0	0	0	0
Oceanispirochaeta	0	0.0701189	0	0	0	0	0	0	0	0	0	0	0	0	0	0	0	0	0	0	0	0	0	0	0	0	0	0	0.0469247	0	0	0	0	0	0	0	0	0	0	0	0	0	0	0	0	0	0	0	0
Oceanobacillus	0.0659199	0	0	0.0274144	0	0	0	0.0713299	0	0	0	0	0	0	0	0	0	0	0	0	0.0138011	0	0	0	0	0	0	0	0.618556	0	0	0	0	0.0169758	0	0.0482106	0	0.0405773	0	0	0	0	0	0	0	0	0	0	0
Oceanotoga	0	0	0	0	0	0	0	0.0323812	0	0	0	0	0	0	0	0	0	0	0	0	0	0	0	0	0	0	0	0	0	0	0	0	0	0	0	0	0	0	0	0	0	0	0	0	0	0	0	0	0
Octopodidae	0	0	0	0	0	0	0	0	0	0	0	0	0	0	0	0	0	0	0.78918	0	0	0	0	0	0	0	0	0	0	0	0	0	0	0	0	0	0	0	0	0	0	0	0	0	0	0	0	0	0
Odoribacter	0.698581	0	0	0	0	0	0	0	0	0	0	0	0	0	0	0	0	0	0.691808	0	0.189212	0	2.68241	0	0	0.0243181	0	0	1.16601	0	0	0	0	0	0	0	0	0	0	0	0	0	0	0	0	0	0	0	0
Oenococcus	0	0.052119	0	0	0	0	0	0	0	0	0	0	0	0	0	0	0	0	0	0	0	0	0	0	0	0	0	0	0	0	0.0346659	0	0	0	0	0	0	0	0	0	0	0	0	0	0	0	0	0	0
Ohtaekwangia	0.00868013	0	0	0	0	0	0	0	0	0	0	0	0	0	0	0	0	0	0.0995282	0	0	0	0	0	0	0	0	0	0	0	0	0	0	0	0	0	0	0	0	0	0	0	0	0	0	0	0.26935	0	0
Okubovirus	0	0	0	0	0	0	0	0	0	0	0	0	0	0	0	0	0	0	0	0	0	0	0	0	0	0	0	0	0	0	0	0	0	0	0	0	0	0	0	0	0	0	0	0	0	0	0	0	0
Oleaceae	0	0	0	0	0	0	0	0	0	0	0	0	0	0	0	0	0	0	0	0	0	0	0	0	0	0	0	0	0	0	0	0	0	0	0	0	0	0	0	0	0	0	0	0	0	0	0	0	0
Olivibacter	0	0	0	0.0442884	0	0	0	0	0	0.0458441	0	0	0	0	0	0	0	0	0	0	0.0307969	0	0	0	0	0	0	0.0925292	0	0.407259	0	0	0	0	0	0	0.0720143	0.578039	0	0.117525	0	0	0	0	0	0	0	0	0
Olsenella	1.54466	0	0	0.217837	0	0	0	1.25976	0	0	0	0	0	0	0	0	0	0	0	0	0.011829	0	0	0	0	0	0	0	0.375973	0	0	0	0	0	0	0.00780975	0	1.11239	0	0	0	0	0	0	0	0	0	0	0
Omphalotaceae	0	0	0	0	0	0	0	0	0	0	0	0	0	0	0	0	0	0	0	0	0	0	0	0	0	0	0	0	0.0218094	0	0	0	0	0	0	0	0	0	0	0	0	0	0	0	0	0	0	0	0
Onchocercidae	0	0	0	0	0	0	0	0	0	0	0	0	0	0	0	0	0	0	0.157549	0	0	0	0	0	0	0	0	0	0	0	0	0	0	0	0	0	0	0	0	0	0	0	0	0	0	0	0	0	0
Ophiocordycipitaceae	0	0	0	0	0	0	0	0	0	0	0	0	0	0	0	0	0	0	0	0	0	0	0	0	0	0	0	0.0162311	0	0	0	0	0	0	0	0	0	0	0	0	0	0	0	0	0	0	0	0	0
Ophiostomataceae	0.0168924	0	0	0	0	0	0	0	0	0	0	0	0	0	0	0	0	0	0	0	0	0	0	0	0	0	0	0	0	0	0	0	0	0	0	0	0	0	0	0	0	0	0	0	0	0	0	0	0
Opitutaceae_norank	0.0895096	0	0	0.117529	0	0	0	0	0.0149752	0.0430732	0	0.278056	0	0	0	0	0	0	0.268782	0	0	0	0.0276536	0	0	0	0	0	0.484961	0.770236	0	0	0	0.135206	0.431295	1.50655	0	0.928657	0	0	0	0	0	0	0	0	0	0	0
Opitutae_norank	0	0	0	0.040723	0	0	0	0	0	0	0	0	0	0	0	0	0	0	0	0	0	0	0	0	0	0	0	0	0	0	0	0	0	0	0	0.0800977	0	0.210658	0	0	0	0	0	0	0	0	0	0	0
Opitutales_norank	0	0	0	0	0	0	0	0	0	0	0	0	0	0	0	0	0	0	0	0	0	0	0	0	0	0	0	0	0	0	0	0	0	0	0	0.847556	0	0	0	0	0	0	0	0	0	0	0	0	0
Opitutus	0	0	0	0.0865372	0	0	0	0	0	0	0	0	0	0	0	0	0	0	0.0515683	0	0.161739	0	0.0857226	0	0	0.0134134	0.0647882	0	0	0	0	0	0	0	0.111802	0	0	0.0458712	0	0	0	0	0	0	0	0	0	0	0
Orbiliaceae	0	0	0	0	0	0	0	0	0	0	0	0	0	0	0	0	0	0	0	0	0	0	0	0	0	0	0	0.0182803	0	0	0	0	0	0	0	0	0	0.0300425	0	0	0	0	0	0	0	0	0	0	0
Orchidaceae	0	0	0	0	0	0	0	0	0	0	0	0	0	0	0	0	0	0	0.0311485	0	0	0	0	0	0	0	0	0	0	0	0	0	0	0	0	0	0	0	0	0	0	0	0	0	0	0	0	0	0
Orenia	0.0172509	0	0	0	0	0	0	0	0	0	0	0	0	0	0	0	0	0	0	0	0.0425099	0	0.592563	0	0	0	0	0.0432927	1.23653	0	0	0	0	0	0	0.550539	0	2.04275	0	0	0	0	0	0	0	0	0	0	0
Oribacterium	0.371242	0	0	0.616028	0	0	0.0155004	0.643911	0	0	0	0	0	0	0	0.117488	0	0	0.266916	0	0.0282822	0	0.177812	0	0	0	0	0	0.388274	0	0	0	0	0	0	0.294524	0	0.119579	0	0	0	0	0	0	0	0.0813909	0	0	0
Ornatilinea	0	0	0	0	0	0	0	0	0	0	0	0	0	0	0	0	0	0	0	0	0	0	0	0	0	0	0	0	0	0	0	0	0	0	0	0	0	0	0	0	0	0	0	0	0	0	0	0	0
Ornithinibacillus	0	0	0	0	0	0	0	0	0	0	0	0	0	0	0	0	0	0	0	0	0.0598171	0	0	0	0	0	0	0	0	0	0	0	0	0	0	0	0	0	0	0	0	0	0	0	0	0	0	0	0
Ornithobacterium	0	0	0	0	0	0	0	0	0	0	0	0	0	0	0	0	0	0	0.0824528	0	0	0	0	0	0	0	0	0	0	0	0	0	0	0	0	0	0	0	0	0	0	0	0	0	0	0	0	0	0
Orthopoxvirus	0	0	0	0	0	0	0	0	0	0	0	0	0	0	0	0	0	0	0	0	0	0	0	0	0	0	0	0	0.109948	0	0	0	0	0	0	0	0	0	0	0	0	0	0	0	0	0	0	0	0
Oscillatoriales_norank	0	0	0	0	0	0	0	0	0	0	0	0	0	0	0	0	0	0	0	0	0	0	0	0	0	0	0	0	0	0	0	0	0	0	0	0	0	0	0	0	0	0	0	0	0	0	0.0234693	0	0
Oscillibacter	2.90029	0.014639	0	0.0151981	0	0.517014	0.204372	0	0	0	0.123303	0	0	0	0	0	0	0	0.0429056	0	0.008165	0	0	0	0	0	0	0.112678	0.626891	0	0	0	0	0	0.183478	0.0467585	0	0	0	0	0	0	0	0	0	0	0.0449713	0	0
Oscillospiraceae_norank	0	0	0	0	0	0	0	0	0	0	0	0	0	0	0	0	0	0	0	0	0	0	0	0	0	0	0	0	0	0	0	0	0	0	0	0	0	0	0	0	0	0	0	0	0	0	0	0	0
Ottowia	0	0	0	0	0	0	0	0	0	0	0	0	0	0	0	0	0	0	0	0	0	0	0	0	0	0	0	0	0	0	0	0	0	0	0	0	0	0	0	0	0	0	0	0	0	0	0	0	0
Owenweeksia	0	0	0	0	0	0	0	0	0	0	0	0	0	0	0	0	0	0	0	0	0	0	0	0	0	0	0	0	0	0	0	0	0	0	0	0	0	0	0	0	0	0	0	0	0	0	0	0	0
Oxalobacter	0.157291	0	0	0	0	0	0	0	0	0	0	0	0	0	0	0	0	0	0	0	0	0	0	0	0	0	0	0	0	0	0	0	0	0	0	0	0	0	0	0	0	0	0	0	0	0	0	0	0
Oxalobacteraceae_norank	0	0	0	0	0	0	0	0	0	0	0	0	0	0	0	0	0	0	0	0	0	0	0	0	0	0	0	0.0240375	0	0	0	0	0	0	0	0	0	0	0	0	0	0	0	0	0	0	0	0	0
Oxobacter	0.028245	0	0	0	0	0	0	0	0	0	0	0	0	0	0	0	0	0	0	0	0	0	0	0	0	0	0	0	0	0	0	0	0	0	0	0	0	0	0	0	0	0	0	0	0	0	0	0	0
Paenarthrobacter	0	0	0	0	0	0	0	0	0	0	0	0	0	0	0	0	0	0	0	0	0	0	0	0	0	0	0	0	0	0	0.0816559	0	0	0	0	0	0	0	0	0	0	0	0	0	0	0	0	0	0
Paenibacillaceae_norank	0.436744	0	0	0	0	0	0	0	0	0.18625	0	0	0	0.0668525	0	0	0	0	0.0181609	0.0397877	0.12035	0	0.864626	0	0.14645	0.0257586	0.579594	0.117419	0.998346	0.0638217	0	0	0	0	0.431967	0	0	0.154295	0	0	0	0	0	0	0	0	0.0234532	0	0
Paenibacillus	13.7536	8.7116	0	18.8498	0	8.01647	5.31322	14.9352	0.0763986	8.26816	0.0348108	1.04096	0	0.894689	0	0.441525	0	2.28392	16.3198	9.3905	27.2451	0	2.10679	0	2.25242	2.56648	54.5762	7.93034	44.336	23.2582	10.7499	0.0404406	0	5.90763	17.9579	7.30463	0.680745	24.2973	0	0.327123	0	0	0.10559	0.401211	0	0.174343	6.03253	0	0.117249
Paeniclostridium	0	0	0	0	0	0	0	0	0	0	0	0	0	0	0	0	0	0	0	0	0	0	0	0	0	0	0	0	0	0	0	0	0	0	0	0.0313347	0	0	0	0	0	0	0	0	0	0	0.214093	0	0
Paenisporosarcina	0	0	0	0	0	0	0	0.0378279	0	0	0	0	0	0	0	0	0	0	0	0	0	0	0	0	0	0	0	0	0	0	0	0	0	0	0	0	0	0	0	0	0	0	0	0	0	0	0	0	0
Paludibacter	3.51509	0.139702	0	2.50254	0	0	2.9154	0	0	2.12762	0	0.158393	0	0	0	0	0	0	0.158866	0.0361182	0.399523	0	0.0818519	0	0	0.0145841	0	0.769486	0.361286	0	0	0	0	0	1.12441	0.651691	0.0488833	0.262202	0	0.471329	0	0	0	0	0	0	0	0	6.51938
Paludifilum	0	0	0	0	0	0	0	0	0	0	0	0	0	0	0	0	0	0	0	0	0	0	0	0	0	0	0	0	0	0	0	0	0	0	0	0	0	0	0	0	0	0	0	0	0	0	0	0	0
Paludisphaera	0	0	0	0	0	0	0	0	0	0	0	0	0	0	0	0	0	0	0	0	0	0	0	0	0	0	0	0	0	0	0	0	0	0	0	0	0	0	0	0	0	0	0	0	0	0	0	0	0
Panacibacter	0.0280172	0	0	0	0	0	0	0	0	0	0	0	0	0	0	0	0	0	0.121471	0	0	0	0	0	0	0	0	0.0644519	0	0	0	0	0	0	0	0	0	0.114158	0	0	0	0	0	0	0	0	0	0	0
Panagrolaimidae	0	0	0	0	0	0	0	0	0	0	0	0	0	0	0	0	0	0	0.507345	0	0	0	0	0	0	0	0	0	0	0	0	0	0	0	0	0	0	0	0	0	0	0	0	0	0	0	0	0	0
Pantoea	0	0	0	0	0	0	0	0	0	0	0	0	0	0	0	0	0	0	0	0	0	0	0.313332	0	0	0	0	0	0	0.00918631	0	0	0	0	0	0	0	0	0	0	0	0	0	0	0	0	0	0	0
Papillibacter	0.66262	0	0	0	0	0	0.28554	0	0	0	0	0	0	0	0	0	0	0	0	0	0	0	0	0	0	0	0	0	0	0	0	0	0	0	0	0	0	0	0	0	0	0	0	0	0	0	0	0	0.19683
Parabacteroides	44.3713	1.43554	0	6.42411	0	1.07251	0	0	0	2.02959	0	0	0	0	0	0.942823	0	5.0741	3.51748	0.315168	9.74007	0	1.23898	0	6.6465	30.0416	4.18512	4.69939	33.8185	1.35854	1.67391	0	0	0.240796	0.531405	5.60882	0	29.9365	0	0.0536285	0	0	0	0.0791387	0	0	1.29097	0	0.588426
Paraburkholderia	0	0	0	0	0	0	0	0	0	0	0	0	0	0	0	0	0	0	0	0	0	0	0	0	0	0	0.0350076	0	0	0	0	0	0	0	0.0513851	0	0	0	0	0	0	0	0	0	0.0299104	0	0	0	0
Paraclostridium	0.0673371	0	0	0	0	0	0	0	0	0	0	0	0	0	0	0	0	0	0	0	0	0	0	0	0	0	0	0	0.0406339	0	0	0	0	0	0	0	0	0	0	0	0	0	0	0	0	0	0	0	0
Paracnuella	0	0	0	0	0	0	0	0	0	0	0	0	0	0	0	0	0	0	0	0	0	0	0	0	0	0	0	0	0	0	0	0	0	0	0	0	0	0	0	0	0	0	0	0	0	0	0	0	0
Paracoccus	0	0	0	0	0	0	0	0	0	0	0	0	0	0	0	0	0	0	0	0	0	0	0	0	0	0	0	0	0	0	0	0	0	0	0.0184967	0	0	0	0	0	0	0	0	0	0	0	0	0	0
Paraeggerthella	0.165231	0	0	0	0	0	0	0	0	0	0	0	0	0	0	0	0	0	0	0	0	0	0	0	0	0	0	0	0	0	0	0	0	0	0	0	0	0	0	0	0	0	0	0	0	0	0	0	0
Paraferrimonas	0	0	0	0	0	0	0	0	0	0	0	0	0	0	0	0	0	0	0	0	0	0	0	0	0	0	0	0.0170054	0	0	0	0	0	0	0	0	0	0	0	0	0	0	0	0	0	0	0	0	0
Parafilimonas	0	0	0	0	0	0	0	0	0	0	0	0	0	0	0	0	0	0	0	0	0	0	0	0	0	0	0	0	0	0	0	0	0	0	0	0	0	0	0	0	0	0	0	0	0	0	0	0	0
Paraflavitalea	0	0	0	0.210756	0	0	0	0	0	0	0	0	0	0	0	0.0396296	0	0	0	0	0	0	0	0	0	0.354161	0	0	0	0	0	0	0	0	0	0	0	0	0	0	0	0	0	0	0	0	0	0	0.0568394
Parageobacillus	0.0576854	0	0	0	0	0	0	0	0	0	0	0	0	0	0	0	0	0	0	0	0	0	0	0	0	0.0600924	0	0	0.106175	0	0	0	0	0	0	0	0	0	0	0	0	0	0	0	0	0	0	0	0
Paraglaciecola	0	0	0	0	0	0	0	0	0	0.0255963	0	0	0	0	0	0	0	0	0	0	0	0	0	0	0	0	0.056493	0	0	0	0	0	0	0	0	0	0	0	0	0	0	0	0	0	0	0	0	0	0
Paraliobacillus	0.363079	0	0	0	0	0	0	0	0	0	0	0	0	0	0	0	0	0.0120399	0	0	0	0	0	0	0	0	0	0	1.19204	0	0	0	0	0	0	0	0.0620409	0	0	0	0	0	0	0.0301444	0	0	0	0	0
Paramaledivibacter	0	0	0	0	0	0	0	0	0	0	0	0	0	0	0	0	0	0	0	0	0	0	0	0	0	0	0	0	0.535096	0	0	0	0	0	0	0.747214	0	0	0	0	0	0	0	0	0	0	0	0	0
Paramecium	0	0	0	0	0	0	0	0	0	0	0	0	0	0	0	0	0	0	0.109692	0	0	0	0	0	0	0	0	0.108075	0	0	0	0	0	0	0	0	0	0	0	0	0	0	0	0	0	0	0.125554	0	0
Parapedobacter	0	0.243317	0	0	0	0	0	0	0	2.02799	0	0	0	0	0	0	0	0	0	0	0.123303	0	0	0	0	0.385623	0.0363294	0	0.0290637	0	0	0	0	0	0	2.81769	0	0.907276	0	0	0	0	0	0	0	0	0	0	0
Paraprevotella	0	3.01945	0	5.38434	0	0	0	0	0	0.525812	0	0.327886	4.01118	0	0	0	0	4.02329	0.782454	1.10903	29.7797	0	13.8505	0	0	4.38358	0.846089	0	5.6121	0	0	0	0	0	0.960422	2.87686	0	2.20292	0	3.8968	0	0	0	0	0	0	0.0581376	0	0
Pararcticibacter	0.881998	0	0	0.206488	0	0	0	0	0	0	0	0.0537645	0	0	0	0	0	0	0	0	0.299568	0	0	0	0	0	0	0	0.0344455	0	0	0	0	0.0831856	0	0.0215628	0	0.0164206	0	0	0	0	0	0	0	0.0658984	0	0	0
Parascardovia	0.047862	0	0	0	0	0	0	0	0	0	0	0	0	0	0	0	0	0	0	0	0	0	0	0	0	0	0	0	0	0	0	0	0	0	0	0	0	0	0	0	0	0	0	0	0	0	0	0	0
Parasporobacterium	0	0	0	0	0	0	0	0	0	0	0	0	0	0	0	0	0	0	0	0	0	0	0	0	0	0	0	0	0	0.0375998	0	0	0	0	0	0	0	0	0	0	0	0	0	0	0	0	0	0	0
Parasutterella	0	0	0	0	0	0	0	0	0	0	0	0	0	0	0	0	0	0	0	0	0	0	0	0	0	0	0	0	0	0	0	0	0	0	0	0	0	0	0	0	0	0	0	0	0	0	0	0	0
Paridae	0	0	0	0	0	0	0	0	0	0	0	0	0	0	0	0	0	0	0.0331694	0	0	0	0	0	0	0	0	0	0	0	0	0	0	0	0	0	0	0	0	0	0	0	0	0	0	0	0	0	0
Parolsenella	0	0	0	0	0	0	0	0	0	0	0	0	0	0	0	0	0	0	0	0	0	0	0	0	0	0	0	0	0	0	0	0	0	0	0	0	0	0	0	0	0	0	0	0	0	0	0	0	0
Pasteurella	0	0	0	0	0	0	0	0	0	0	0	0	0	0	0	0	0	0	0	0	0	0	0	0	0	0	0	0	0	0	0	0	0	0	0	0	0	0	0	0	0	0	0	0	0	0	0	0	0
Pasteurellaceae_norank	0	0	0	0	0	0	0	0	0	0	0	0	0	0	0	0	0	0	0	0	0	0	0	0	0	0	0	0	0	0	0	0	0	0	0	0	0	0	0	0	0	0	0	0	0	0	0	0	0
Paucisalibacillus	0	0	0	0	0	0	0	0	0	0	0	0	0	0	0	0	0	0	0	0	0	0	0	0	0	0	0	0	0	0	0	0	0	0	0	0	0	0	0	0	0	0	0	0	0	0	0	0	0
Pecentumvirus	0	0	0	0	0	0	0	0	0	0	0	0	0	0	0	0	0	0	0	0	0	0	0	0	0	0	0	0	0	0	0	0	0	0	0	0	0	0	0	0	0	0	0	0	0	0	0	0	0
Pectinidae	0	0	0	0	0	0	0	0.0134413	0	0	0	0	0	0	0	0	0	0	0.0152862	0	0	0	0	0	0	0	0	0	0	0	0	0	0	0	0	0	0	0	0	0	0	0	0	0	0	0	0	0	0
Pectobacterium	0	0	0	0	0	0	0	0	0	0	0	0	0	0	0	0	0	0	0	0	0	0	0	0	0	0	0	0	0	0	0	0	0	0	0.0242142	0	0.0115429	0	0	0	0	0	0	0	0	0	0	0	0
Pediculidae	0	0	0	0	0	0	0	0	0	0	0	0	0	0	0	0	0	0	0.710163	0	0	0	0	0	0	0	0	0	0	0	0	0	0	0	0	0	0	0	0	0	0	0	0	0	0	0	0	0	0
Pediococcus	0	0	0	0	0	0	0	0	0	0	0	0	0	0	0	0	0	0	0	0	0	0	0	0	0	0	0	0	0	0	0	0	0	0	0	0	0	0.0115509	0	0	0	0	0	0	0	0	0	0	0
Pedobacter	0.654156	0	0	2.06272	0	0	0	0	0	0.161497	0	0.0183253	0	0	0	0	0	0	0	0	1.71681	0	0.366146	0	0	0	0.0111898	0.925721	0.877977	0.103074	0.0616146	0	0	0.150192	0.60993	0.201505	0	8.90172	0	0	0	0	0	0	0	0	2.37677	0	0
Pedosphaera	0	0	0	0.0709498	0	0	0	0	0	0	0	0	0	0	0	0	0	0	0	0	0	0	0	0	0	0	0.021453	0	0	0.0384194	0	0	0	0	0	0	0	0	0	0	0	0	0	0	0	0	0	0	0
Pelagibacterium	0	0	0	0	0	0	0	0	0	0	0	0	0	0	0	0	0	0	0	0	0.0779265	0	0	0	0	0	0	0	0	0	0	0	0	0	0	0	0	0	0	0	0	0	0	0	0	0	0	0	0
Pelagirhabdus	0	0.023112	0	0	0	0	0	0	0	0	0.0203144	0	0	0	0	0	0	0	0	0	0	0	0	0	0	0	0	0	0	0	0.032401	0	0	0	0	0	0	0	0	0	0	0	0	0	0	0	0	0	0
Pelobium	0	0	0	0	0	0	0	0	0	0	0	0	0	0	0	0	0	0	0	0	0.0590209	0	0	0	0	0	0	0	0	0	0	0	0	0	0	0.0294496	0	0	0	0	0	0	0	0	0	0	0	0	0
Pelolinea	0	0	0	0	0	0	0	0.0614181	0	0	0	0	0	0	0	0	0	0	0	0	0	0	0	0	0	0	0	0	0	0	0	0	0	0	0	0	0	0	0	0	0	0	0	0	0	0	0	0	0
Pelomonas	0	0	0	0	0	0	0	0	0	0	0	0	0	0	0	0	0	0	0	0	0	0	0	0	0	0	0	0	0.0719146	0	0	0	0	0	0	0	0	0	0	0	0	0	0	0	0	0	0	0	0.0382524
Pelosinus	0	0	0	0	0	0	0	0	0	0	0	0	0	0	0	0	0	0	0	0	0	0	0.0411591	0	0	0.413806	0	0	0	0	0	0	0	0	0	0	0	0	0	0	0	0	0	0	0	0	0	0	0
Pelotomaculum	0.00181438	0	0	0	0	0	0	0	0	0	0	0	0	0	0	0	0	0	0	0	0	0	0	0	0	0	0	0	0	0	0	0	0	0	0	0	0	0	0	0	0	0	0	0	0	0	0	0	0
Pentatomidae	0	0	0	0	0	0	0	0	0	0	0	0	0	0	0	0	0	0	0	0	0	0	0	0	0	0	0	0	0	0	0	0	0	0	0	0	0	0	0	0	0	0	0	0	0	0	0	0	0
Peptoclostridium	0	0	0	0	0	0	0.0271524	0	0	0	0	0	0	0	0	0	0	0	0	0	0	0	0	0	0	0	0	0	0	0	0	0	0	0	0	0	0	0	0	0	0	0	0	0	0	0	0	0	0
Peptococcaceae_norank	0	0	0	0	0	0	0.042348	0	0	0	0	0	0	0	0	0	0	0	0	0	0	0	0.0718007	0	0	0	0	0	0	0	0	0	0	0	0	0	0	0	0	0	0	0	0	0	0	0	0.024929	0	0.0718884
Peptococcus	0	0	0	0	0	0	0	0	0	0	0	0	0	0	0	0	0	0	0	0	0	0	0	0	0	0	0	0	0	0	0	0	0	0	0	0	0	0	0	0	0	0	0	0	0	0	0	0	0
Peptoniphilus	0	0	0	0	0	0	0	0	0	0	0	0	0	0	0	0	0	0	0	0	0	0	0	0	0	0	0	0	0	0	0	0	0	0	0	0	0	0	0	0	0	0	0	0	0	0	0	0	0
Peptostreptococcaceae_norank	0.249543	0	0	0	0	0	0	0.114868	0	0	0	0	0	0	0	0	0	0	0	0	0.0599328	0	0	0	0	0	0	0	0.111525	0	0.0390264	0	0	0	0	0.0225856	0	0	0	0	0	0	0	0	0	0	0	0	0
Peptostreptococcus	0	0	0	0	0	0	0	0	0	0	0	0	0	0	0	0	0	0	0	0	0	0	0	0	0	0	0	0	0	0	0	0	0	0	0	0	0	0	0	0	0	0	0	0	0	0	0	0	0
Persephonella	0	0	0	0	0	0	0	0	0	0	0	0	0	0	0	0	0	0	0	0	0	0	0	0	0	0	0	0	0	0	0	0	0	0	0	0	0	0	0	0	0	0	0	0	0	0	0	0	0
Persicobacter	0	0	0	0	0	0	0	0	0	0	0	0	0	0	0	0	0	0	0	0	0.0513203	0	0	0	0	0	0	0	0.142093	0	0	0	0	0	0	0	0	0	0	0	0	0	0	0	0	0	0	0	0
Petrimonas	0	0	0	0.028073	0	0	0	0	0	0	0	0	0	0	0	0	0	0	0	0	0	0	0	0	0	0.401272	0.576562	0	0.129824	0	0.0866945	0	0	0	0.0433951	0.355693	0	0.257672	0	0	0	0	0	0	0	0	0	0	0
Petrocella	0	0	0	0	0	0	0	0	0	0	0	0	0	0	0	0	0	0	0	0	0	0	0	0	0	0	0	0	0	0	0	0	0	0	0	0	0	0	0	0	0	0	0	0	0	0	0	0	0
Petroclostridium	0.0671344	0	0	0.559191	0	0	0	0	0	0	0	0	0	0	0	0	0	0	0	0.235313	0.0297315	0	0	0	0	0.228073	0	0	0.452346	0	0	0	0	0	0.0178079	0.415482	0	0	0	0	0	0	0	0	0	0	0	0	0
Petrotoga	0.527135	0	0	0	0	0	0	0	0	0	0	0	0	0	0	0	0	0	0.06099	0	0	0	0	0	0	0	0	0.191428	0	0	3.22856	0	0	0	0	0	0	0	0	0	0	0	0	0	0	0	0	0	0
Pezizaceae	0	0	0	0	0	0	0	0	0	0	0	0	0	0	0	0	0	0	0	0	0	0	0	0	0	0	0	0.141773	0	0	0	0	0	0	0	0	0	0	0	0	0	0	0	0	0	0	0	0	0
Phaeosphaeriaceae	0	0	0	0	0	0	0	0	0	0	0	0	0	0	0	0	0	0	0	0	0	0	0	0	0	0	0.0173378	0	0	0	0	0	0	0	0	0	0	0	0	0	0	0	0	0	0	0	0	0	0
Phaffomycetaceae	0	0	0	0	0	0	0	0	0	0	0	0	0	0	0	0	0	0	0	0	0	0	0	0	0	0	0	0	0	0	0	0	0	0	0	0	0	0	0	0	0	0	0	0	0	0	0	0	0
Phascolarctobacterium	0	0	0	0	0	0	0	0	0	0	0	0	0	0	0	0	0	0	0	0	0	0	0	0	0	0	0	0	0	0	0	0	0	0	0	0	0	0	0	0	0	0	0	0	0	0	0	0	0
Phasianidae	0	0	0	0	0	0	0	0	0	0	0	0	0	0	0	0	0	0	0.147486	0	0	0	0	0	0	0	0	0	0	0	0	0	0	0	0	0	0	0	0	0	0	0	0	0	0	0	0	0	0
Phenylobacterium	0	0	0	0	0	0	0	0	0	0	0	0	0	0	0	0	0	0	0	0	0	0	0	0	0	0	0	0	0	0	0	0	0	0	0	0	0	0	0	0	0	0	0	0	0	0	0	0	0
Phocaeicola	0	0	0	0	0	0	0	0	0	0	0	0	0	0	0	0	0	0.0138437	0	0	0	0	0.0218068	0	0	0.568575	0	0.309191	0.388882	0	0	0	0	0	0	0	0	1.32824	0	0	0	0	0	0	0	0	0	0	0
Phoenicibacter	0	0	0	0	0	0	0	0	0	0	0	0	0	0	0	0	0	0	0	0	0	0	0	0	0	0	0	0	0	0	0	0	0	0	0	0.0304633	0	0	0	0	0	0	0	0	0	0	0	0	0
Phormidesmis	0	0	0	0	0	0.0362338	0	0	0	0	0	0	0	0	0	0	0	0	0	0	0	0	0	0	0	0	0	0	0	0	0	0	0	0	0	0	0	0	0	0	0	0	0	0	0	0	0	0	0
Phormidium	0	0	0	0	0	0.0653146	0	0	0	0	0	0	0	0	0	0	0	0	0	0	0	0	0	0	0	0	0	0	0	0	0	0	0	0	0	0	0	0	0	0	0	0	0	0	0	0	0	0	0
Photobacterium	0	0	0	0	0	0	0	0	0	0	0	0	0	0	0	0	0	0	0	0	0	0	0	0	0	0	0	0	0	0	0	0	0	0	0.0677372	0	0	0	0	0	0	0	0	0	0	0	0	0	0
Phycicoccus	0	0	0	0	0	0	0	0	0	0	0	0	0	0	0	0	0	0	0.127591	0	0	0	0	0	0	0	0	0	0	0	0	0	0	0	0	0	0	0	0	0	0	0	0	0	0	0	0	0	0
Phycisphaera	0	0	0	0	0	0	0	0	0	0	0	0	0	0	0	0	0	0	0	0	0	0	0	0	0	0	0	0	0	0	0	0	0	0	0	0	0.415725	0	0	0	0	0	0	0	0	0	0	0	0
Phycisphaeraceae_norank	0	0	0	0.680615	0	0	0	0	0	0.0531359	0	0	0	0	0	0	0	0	0	0	0.0286868	0	0	0	0	0	0	0.0214918	1.77836	0.449092	0.101115	0	0	0	0	2.72961	0	0.0120573	0	0	0	0	0	0.359605	0	0	0	0	0
Phycisphaerae_norank	0	0	0	0	0	0	0	0.0380807	0	0	0	0	0	0	0	0	0	0	0	0	0	0	0	0	0	0	0	0	0.0307834	0	0.0368389	0	0	0	0	0.313751	0	0.388635	0	0	0	0	0	0	0	0	0.120761	0	0
Phycisphaerales_norank	0.987456	0	0	0.883192	0	0	0	0	0	0.457578	0	0	0	0	0	3.02939	0	0.716863	0	0	0.0280603	0	0.460109	0	0	1.80096	0.113527	0.296465	2.26192	0.0551582	0.0715507	0	0	0	0	0.458968	0	0.417718	0	0	0	0	0	0	0	0	0.0789123	0	0
Phyllobacterium	0	0	0	0	0	0	0	0	0	0	0	0	0	0	0	0	0	0	0	0	0	0	0	0	0	0	0	0.0255278	0	0	0	0	0	0	0	0	0	0	0	0	0	0	0	0	0	0	0	0	0
Phyllostomidae	0	0	0	0	0	0	0	0	0	0	0	0	0	0	0	0	0	0	0.129193	0	0	0	0	0	0	0	0	0	0	0	0	0	0	0	0	0	0	0	0	0	0	0	0	0	0	0	0	0	0
Phytoactinopolyspora	0	0	0	0.0231534	0	0	0	0	0	0	0	0	0	0	0	0	0	0	0	0	0	0	0	0	0	0	0	0	0.422795	0	0	0	0	0	0.0681165	0.225797	0	0	0	0	0	0	0	0	0	0	0	0	0
Phytophthora	0	0	0	0	0	0	0	0	0	0	0	0	0	0	0	0	0	0	0.189714	0	0	0	0	0	0	0	0	0	0	0	0	0	0	0	0	0	0	0	0	0	0	0	0	0	0	0	0	0	0
Picidae	0	0	0	0	0	0	0	0	0	0	0	0	0	0	0	0	0	0	0.0690906	0	0	0	0	0	0	0	0	0	0	0	0	0	0	0	0	0	0	0	0	0	0	0	0	0	0	0	0	0	0
Pilibacter	0	0	0	0	0	0	0	0	0	0	0	0	0	0	0	0	0	0	0	0	0.174308	0	0	0	0	0	0	0	0	0	0	0	0	0	0	0	0	0	0	0	0	0	0	0	0	0	0	0	0
Pimelobacter	0	0	0	0	0	0	0	0	0	0	0	0	0	0	0	0	0	0	0	0	0	0	0	0	0	0	0	0.0549177	0	0	0	0	0	0	0	0	0	0	0	0	0	0	0	0	0	0	0	0	0
Pinaceae	0	0	0	0	0	0	0	0	0	0	0	0	0	0	0	0	0	0	0	0	0	0	0	0	0	0	0	0	0	0	0	0	0	0	0	0	0	0	0	0	0	0	0	0	0	0	0	0	0
Pipridae	0	0	0	0	0	0	0	0	0	0	0	0	0	0	0	0	0	0	0.0718778	0	0	0	0	0	0	0	0	0	0	0	0	0	0	0	0	0	0	0	0	0	0	0	0	0	0	0	0	0	0
Pirellula	0	0	0	0	0	0	0	0	0	0	0	0	0	0	0	0	0	0	0	0	0	0	0	0	0	0	0	0	0	0	0	0	0	0	0	0	0	0	0	0	0	0	0	0	0	0	0	0	0
Pisciglobus	0.0228374	0	0	0	0	0	0	0	0	0	0	0	0	0	0	0	0	0	0.0401546	0	0	0	0	0	0	0	0	0	0	0	0	0	0	0	0	0	0	0	0	0	0	0	0	0	0	0	0	0	0
Plakobranchidae	0	0	0	0	0	0	0	0.010343	0	0	0	0	0	0	0	0	0	0	0	0	0	0	0	0	0	0	0	0	0	0	0	0	0	0	0	0	0	0	0	0	0	0	0	0	0	0	0	0	0
Planctomicrobium	0	0	0	0	0	0	0	0	0	0	0	0	0	0	0	0	0	0	0	0	0	0	0	0	0	0	0	0	0	0	0	0	0	0	0	0	0	0	0	0	0	0	0	0	0	0	0	0	0
Planctomyces	0	0	0	0	0	0	0	0	0	0	0	0	0	0	0	0	0	0	0	0	0	0	0	0	0	0	0.210636	0	0	0	0.0542734	0	0	0	0	0.0223346	0	0	0	0	0	0	0	0	0	0	0	0	0
Planctomycetaceae_norank	0	0	0	0.206088	0	0.0314413	0	0	0	0	0	0	0	0	0	0	0	0.357121	0	0	0.301162	0	0.341399	0	0.0333466	0.117605	1.78371	0.0866038	1.18469	0	0	0	0	1.12589	0	0.857796	2.48083	0.0254718	0	0	0	0	0	0	0	0	0.251434	0	0
Planctomycetales_norank	0	0	0	0.947393	0	0	0	0	0	0	0	0	0	0	0	0	0	0	0	0	0.78855	0	0.267442	0	0	0	0	0	0	0	0	0	0	0	0	0	0	0	0	0	0	0	0	0	0	0	0	0	0
Planctomycetes_norank	0.0108561	0	0	6.92429	0	0.066474	0.0259302	0	0	0	0	0	0	0	0	0.167962	0	0.549969	0.34121	0	2.73859	0	4.93824	0	0.264349	0.63027	1.80126	1.56639	4.79099	1.01386	3.13687	0	0.0687777	0.213219	0.0282745	1.36419	0.520426	3.23511	0	0	0	0	0	0	0	0	0.177095	0	0
Planctomycetia_norank	0	0	0	0.0632534	0	0	0	0	0	0	0	0	0	0	0	0	0	0	0	0	0	0	0	0	0	0	0.121195	0	0	0	0	0	0	0	0	0.0365069	0	0.0482947	0	0	0	0	0	0	0	0	0	0	0
Planctopirus	0	0	0	0	0	0	0	0	0	0	0	0	0	0	0	0	0	0	0	0	0	0	0	0	0	0	0	0	0	0	0	0	0	0	0	0	0	0	0	0	0	0	0	0	0	0	0	0	0
Planifilum	0	0	0	0	0	0	0	0	0	0	0	0	0	0	0	0	0	0	0	0	0	0	0.0356231	0	0	0	0	0	0.0149818	0	0	0	0	0	0	0	0	0	0	0	0	0	0	0	0	0	0	0	0
Planktothrix	0	0	0	0	0	0	0	0	0	0	0	0	0	0	0	0	0	0	0	0	0	0	0	0	0	0	0	0	0	0	0	0	0	0	0	0	0	0	0	0	0	0	0	0	0	0	0	0	0
Planococcus	0	0	0	0	0	0	0	0	0	0	0	0	0	0	0	0	0	0	0	0	0	0	0	0	0	0	0	0	0	0	0	0	0	0	0	0	0.0717115	0	0	0	0	0	0	0	0	0	0	0	0
Planomicrobium	0.00837962	0	0	0	0	0	0	0	0	0	0	0	0	0	0	0	0	0	0	0	0	0	0	0	0	0	0	0	0	0	0	0	0	0	0	0	0	0	0	0	0	0	0	0	0	0	0	0	0
Planoprotostelium	0	0	0	0	0	0	0	0	0	0	0	0	0	0	0	0	0	0	0	0	0	0	0	0	0	0	0	0.547273	0	0	0	0	0	0	0	0	0	0	0	0	0	0	0	0	0	0	0	0	0
Plantactinospora	0	0	0	0	0	0	0	0	0	0	0	0	0	0	0	0	0	0	0	0	0	0	0	0	0	0	0	0	0	0	0	0	0	0	0	0	0	0	0	0	0	0	0	0	0	0	0	0	0
Plantibacter	0	0	0	0	0	0	0	0	0	0	0	0	0	0	0	0	0	0	0	0	0	0	0	0	0	0	0	0	0	0	0	0	0	0	0	0	0	0	0	0	0	0	0	0	0	0	0	0	0
Plasmodiophora	0	0	0	0	0	0	0	0	0	0	0	0	0	0	0	0	0	0	0	0	0	0	0	0	0	0	0	0	0	0	0	0	0	0	0	0	0	0	0	0	0	0	0	0	0	0	0	0	0
Plasmopara	0	0	0	0	0	0	0	0	0	0	0	0	0	0	0	0	0	0	0.137769	0	0	0	0	0	0	0	0	0	0	0	0	0	0	0	0	0	0	0	0	0	0	0	0	0	0	0	0	0	0
Pleomorphomonas	0	0	0	0	0	0	0	0	0	0	0	0	0	0	0	0	0	0	0.0127058	0	0	0	0	0	0	0	0	0	0	0	0	0	0	0	0	0	0	0	0	0	0	0	0	0	0	0	0	0	0
Pleosporaceae	0	0	0	0	0	0	0	0	0	0	0	0	0	0	0	0	0	0	0.0156444	0	0	0	0	0	0	0	0	0	0	0	0	0	0	0	0	0	0	0	0	0	0	0	0	0	0	0	0	0	0
Poaceae	0	0	0	0	0	0	0	0	0	0	0	0	0	0	0	0	0	0	0.255269	0	0	0	0	0	0	0	0	0.0810735	0	0	0	0	0	0	0	0	0	0	0	0	0	0	0	0	0	0	0	0	0
Pocilloporidae	0	0	0	0	0	0	0	0	0	0	0	0	0	0	0	0	0	0	0	0	0	0	0	0	0	0	0	0	0	0	0	0	0	0	0	0	0	0	0	0	0	0	0	0	0	0	0	0	0
Podoviridae_norank	0	0	0	0	0	0	0	0	0	0	0	0	0	0	0	0	0	0	0	0	0	0	0	0	0	0	0	0	0	0	0	0	0	0	0	0.209699	0	0	0	0	0	0	0	0	0	0	0	0	0
Polaribacter	1.4183	0	0	0	0	0	0	0	0	0	0	0	0	0	0	0	0	0	0	0	0	0	0	0	0	0	0.0528201	0.0902908	0	0.0389441	0	0	0	0	0	0	0	0	0	0	0	0	0	0	0	0	0	0	0
Polyangium	0	0	0	0.00610281	0	0.13894	0	0	0	0	0	0	0	0	0	0	0	0	0	0	0	0	0	0	0	0	0	0	0	0	0	0	0	0	0	0	0	0	0	0	0	0	0	0	0	0	0	0	0
Polyplastron	0	0	0	51.4458	0	0	0	0	0	5.88977	13.4079	0	0	0	0	0	0	0	0	0	0	0	0	0	0	0	0	0	0	0	0	0	0	0	0	0	0	0	0	0	0	0	0	0	0	0	0	0	0
Polyporaceae	0	0	0	0	0	0	0	0	0	0	0	0	0	0	0	0	0	0	0	0	0	0	0	0	0	0	0	0	0	0	0	0	0	1.54039	0	0	0	0	0	0	0	0	0	0	0	0	0	0	0
Polysphondylium	0	0	0	0	0	0	0	0	0	0	0	0	0	0	0	0	0	0	0.119494	0	0	0	0	0	0	0	0	0	0	0	0	0	0	0	0	0	0	0	0	0	0	0	0	0	0	0	0	0	0
Polystomatidae	0	0	0	0	0	0	0	0	0	0	0	0	0	0	0	0	0	0	0.176112	0	0	0	0	0	0	0	0	0	0	0	0	0	0	0	0	0	0	0	0	0	0	0	0	0	0	0	0	0	0
Pomacentridae	0	0	0	0.120953	0	0	0	0	0	0	0	0	0	0	0	0	0	0	0	0	0	0	0	0	0	0	0	0	0	0	0	0	0	0	0	0	0	0	0	0	0	0	0	0	0	0	0	0	0
Pontibacillus	0	0	0	0	0	0	0	0	0	0	0	0	0	0	0	0	0	0	0	0	0	0	0	0	0	0	0	0	0	0	0	0	0	0	0	0	0	0	0	0	0	0	0	0	0	0	0	0	0
Pontibacter	0	0	0	0.148172	0	0	0	0	0	0	0	0	0	0	0	0	0	0	0	0	0.118872	0	0	0	0	0	0	0.730539	0	0	0	0	0	0	0.143987	0	0	0	0	0	0	0	0	0	0	0	0	0	0
Ponticaulis	0	0	0	0.00941219	0	0	0	0	0	0	0	0	0	0	0	0	0	0	0	0	0	0	0	0	0	0	0	0	0	0	0	0	0	0	0	0	0	0	0	0	0	0	0	0	0	0	0	0	0
Porphyromonadaceae_norank	18.1624	0.916082	0	0.860274	0	3.98524	0	0	0	0.052209	0.32253	0	0	2.68454	0	0	0	17.2235	13.7368	0	18.1816	0	1.29612	0	0	0.157559	0.0655131	4.08979	1.93612	0.710495	0.948693	0	0	0.1252	2.00353	1.78565	10.7029	9.95355	0	0.158982	0	0	0	0	0	0	0	0	0.34365
Porphyromonas	0.0299401	0	0	0	0	0	0	0	0	0	0	0	0	0	0	0	0	0	0	0	0	0	0	0	0	0	0	0	0.0116969	0	0	0	0	0	0.0619906	0.666908	0	0	0	0	0	0	0	0	0	0	0	0	0
Porticoccaceae_norank	0	0	0	0	0	0	0	0	0	0	0	0	0	0	0	0	0	0	0	0	0	0	0	0	0	0	0	0.131099	0	0	0	0	0	0	0	0	0	0	0	0	0	0	0	0	0	0	0	0	0
Pradoshia	0.357945	0	0	0	0	0	0	0.0133588	0	0	0	0	0	0	0	0	0	0	0	0	0.0119624	0	0	0	0	0	0	0	0	0	0	0	0	0	0	0	0	0	0	0	0	0	0	0	0	0	0	0	0
Prauserella	0	0	0	0	0	0	0	0	0	0	0	0	0	0	0	0	0	0	0	0	0	0	0	0	0	0	0	0	0.0532313	0	0	0	0	0	0	0	0	0	0	0	0	0	0	0	0	0	0	0	0
Prevotella	420.353	37.7454	0	211.695	0	106.273	47.188	0	0.198776	110.446	0	160.077	33.8358	40.3936	0	0.169259	0	65.9008	264.554	107.301	789.907	0	199	0	7.1303	81.4168	28.6334	85.8774	602.362	2.58878	5.42937	0	0	5.41585	143.379	294.287	117.286	78.0977	0	18.4211	0	0	0.103887	0.0376901	0.95863	2.57357	17.1943	2.02958	1.80273
Prevotellaceae_norank	24.6701	28.9587	0	11.2726	0	0.182812	2.29728	0	0	70.1769	0	6.92143	2.22841	0.322681	0	0	0	3.85353	5.25366	1.75992	89.3459	0	5.94158	0	0	2.06819	0	3.26095	33.4188	5.84684	0.274487	0	0	0.0410908	1.57959	12.7109	3.15611	12.8397	0	0	0	0	0	0	0	0.955995	0.101076	0	0
Prevotellamassilia	0	0	0	0	0	0	0	0	0	0	0	0	0	0	0	0	0	0	0	0	0	0	0	0	0	0	0	0	2.00678	0	0	0	0	0	0	0	0	0	0	0	0	0	0	0	0	0	0	0	0
Pricia	0	0	0	0	0	0	0	0	0	0	0	0	0	0	0	0	0	0	0.0406816	0	0	0	0	0	0	0	0	0	0	0	0	0	0	0	0	0	0	0	0	0	0	0	0	0	0	0	0	0	0
Prolixibacter	1.31806	0	0	0.400105	0	0	0	0	0	0	0	0	0	0	0	0	0	0	0	0.200406	0	0	0	0	0	0	0	0.233744	0	0	0	0	0	0	0.0389584	0	0	0.124156	0	0	0	0	0	0	0	0	0	0	0
Prolixibacteraceae_norank	0.367218	0.910887	0	1.80148	0	0.789396	1.9998	0	0	1.49297	0	0	0	0	0	0.0547379	0	0.0599206	0.0475214	0	3.21879	0.175554	0.0380586	0	0	0.23236	0.269006	2.52	1.01256	0.0216209	0	0	0	1.13009	0.0818843	2.58227	0	10.7584	0	0	0	0	0	0	0	0	1.59561	0	0
Promicromonosporaceae_norank	0	0	0	0	0	0	0	0	0	0	0	0	0	0	0	0	0	0	0	0	0	0	0	0	0	0	0	0	0	0	0	0	0	0	0	0.0429517	0	0	0	0	0	0	0	0	0	0	0	0	0
Propionibacterium	0	0	0	0	0	0	0	0	0	0	0	0	0	0	0	0	0	0	0	0	0	0	0	0	0	0	0	0.0185848	0	0	0	0	0	0	0	0	0	0	0	0	0	0	0	0	0	0	0	0	0
Propionicimonas	1.50267	0	0	0	0	0	0	0	0	0	0	0	0	0	0	0	0	0	0	0	0.0561592	0	0	0	0	0	0	0	0	0	0	0	0	0	0	0	0	0	0	0	0	0	0	0	0	0	0	0	0
Propionispira	0.12842	0	0	0	0	0	0	0	0	0	0	0	0	0	0	0	0	0	0	0	0	0	0	0	0	0	0	0	0.0348028	0	0	0	0	0	0	0.0152567	0	0	0	0	0	0	0	0	0	0	0	0	0
Propionispora	0.729943	0	0	0	0	0	0	0.214628	0	0	0	0	0	0	0	0	0	0	0	0	0	0	0.0285565	0	0	0	0	0	0	0	0	0	0	0	0	0	0	0.0926455	0	0	0	0	0	0	0	0	0	0	0
Propionivibrio	0	0	0	0	0	0	0	0	0	0	0	0	0	0	0	0	0	0	0	0	0	0	0	0	0	0	0	0	0	0	0	0	0	0	0	0	0	0	0	0	0	0	0	0	0	0	0	0	0
Prosthecobacter	0	0	0	0	0	0	0	0	0	0	0	0	0	0	0	0	0	0	0	0	0	0	0	0	0	0	0	0	0	0	0	0	0	0	0	0.00496662	0	0	0	0	0	0	0	0	0	0	0	0	0
Proteiniborus	0	0	0	0	0	0	0	0	0	0	0	0	0	0	0	0	0	0	0	0	0	0	0	0	0	0	0	0	0	0	0	0	0	0	0	0	0	0	0	0	0	0	0	0	0	0	0	0	0
Proteiniclasticum	0	0.187704	0	0	0	0	0	0	0	0	0	0	0	0	0	0	0	0	0.229813	0	0	0	0	0	0	0	0	0	16.342	0	0	0	0	0	0	0	0	0	0	0	0	0	0	0	0	0	0	0	0
Proteiniphilum	0.195466	0.0200364	0	0	0	0	0	0	0	0	0	0	0	0	0	0	0	0.286446	0	0	0.493641	0	0.250868	0	0	0.724663	0	0.965395	0.137033	0	0.535834	0	0	0	0.225725	0.244011	0	1.79081	0	0	0	0	0	0	0	0	0	0	0
Proteobacteria_norank	0.45584	0	0	0.144527	0	0	0	0	0	0	0	0	0	0	0	0	0	0	0	0	0.0198175	0	0	0	0	0.0213309	0	0.0453343	0.0327914	0	0	0	0	0	0	0	0	0	0	0	0	0	0	0	0	0	0	0	0
Proteocatella	0.0217466	0	0	0	0	0	0	0	0	0	0	0	0	0	0	0	0	0	0	0	0	0	0	0	0	0	0	0.0239476	0	0	0	0	0	0	0	0	0	0	0	0	0	0	0	0	0	0	0	0	0
Provencibacterium	0	0	0	0	0	0	0	0	0	0	0	0	0	0	0	0	0	0	0	0	0	0	0	0	0	0	0	0	0	0	0	0	0	0	0	0	0	0	0	0	0	0	0	0	0	0	0	0	0
Pseudactinotalea	0	0	0	0	0	0	0	0	0	0	0	0	0	0	0	0	0	0	0	0	0	0	0	0	0	0	0	0	0	0	0	0	0	0	0	0.0163091	0	0	0	0	0	0	0	0	0	0	0	0	0
Pseudarcicella	0	0	0	0	0	0	0	0	0	0	0	0	0	0	0	0	0	0	0	0	0	0	0	0	0	0	0	0.0328973	0	0	0.0651876	0	0	0	0	0	0	0	0	0	0	0	0	0	0	0	0	0	0
Pseudeurotiaceae	0	0	0	0	0	0	0	0	0	0	0	0	0	0	0	0	0	0	0	0	0	0	0	0	0	0	0	0	0	0	0	0	0	0	0	0	0	0	0	0	0	0	0	0	0	0	0	0	0
Pseudoalteromonas	0	0	0	0	0	0	0	0	0	0	0	0	0	0	0	0	0	0	0	0	0	0	0	0	0	0	0.0486683	0	0	0	0	0	0	0	0	0	0	0	0	0	0	0	0	0	0	0	0	0	0
Pseudobacter	0	0	0	0	0	0	0	0	0	0	0	0	0	0	0	0	0	0	0	0	0	0	0	0	0	0	0	0	0	0	0	0	0	0	0	0	0	0	0	0	0	0	0	0	0	0	0	0	0
Pseudobacteroides	0.106513	0.0173728	0	0.887025	0	0	0	0	0	0	0	0	0	0	0	0	0	0.0105266	0	0	0	0	0	0	0	0	0.0599575	0	0	0	0	0	0	0	0	0	0	0	0	0	0	0	0	0	0	0	0	0	0
Pseudobutyrivibrio	14.5557	0	0	3.40951	0	1.99477	4.05944	3.65968	0	1.69085	1.33428	0.822448	0	1.479	0	0.882837	0	0.564082	2.72962	2.00862	46.9858	0	1.77486	0	0	0.839313	0	2.08574	6.04885	2.66871	0.947668	0	0	0	0	0.0247389	6.65772	2.21952	0	0	0	0	0	0	0	0	0.0228951	0	0
Pseudocitrobacter	0.0349111	0	0	0	0	0	0	0	0	0	0	0	0	0	0	0	0	0	0	0	0	0	0	0	0	0	0	0	0	0	0	0	0	0	0	0	0	0	0	0	0	0	0	0	0	0	0	0	0
Pseudoclostridium	1.1525	0.110156	0	1.67506	0	0.12981	0.40187	0.0599747	0	0	0	0	0	0	0	0	0	0.0798367	0.0515515	0.873771	5.04859	0	0.144583	0	18.6219	0.499061	0	0.0259809	6.30545	0.150008	0	0	0	0	0.0231727	0	0	19.5688	0	0	0	0	0	0	0	0.485905	0	0	0
Pseudocohnilembus	0	0	0	0	0	0	0	0	0	0	0	0	0	0	0	0	0	0	0.103901	0	0	0	0	0	0	0	0	0.0982564	0	0	0	0	0	0	0	0	0	0	0	0	0	0	0	0	0	0	0	0	0
Pseudodesulfovibrio	0	0	0	0	0	0	0	0	0	0	0	0	0	0	0	0	0	0	0	0	0	0	0	0	0	0	0	0	0	0	0	0	0	0	0	0	0	0	0	0	0	0	0	0	0	0	0	0	0
Pseudoduganella	0	0	0	0	0	0	0	0	0	0	0	0	0	0	0	0	0	0	0	0	0	0	0	0	0	0	0	0	0	0	0	0	0	0	0.0118572	0	0	0	0	0	0	0	0	0	0	0	0	0	0
Pseudoflavonifractor	11.83	0	0	0.0602079	0	0	0.331553	0.0329286	0	0	0	0	0	0	0	0	0	0.565951	0.0228199	0.0163045	0.225395	0	0	0	0	0.150633	0	0.365681	1.36287	0	0.0397537	0	0	0	0	0	0	2.23055	0	0	0	0	0	0	0	0	0	0	0.131155
Pseudogracilibacillus	0	0	0	0	0	0	0	0	0	0	0	0	0	0	0	0	0	0	0	0	0	0	0	0	0	0	0	0	0	0	0	0	0	0	0	0	0	0	0	0	0	0	0	0	0	0	0	0	0
Pseudogulbenkiania	0	0	0	0	0	0	0	0	0	0	0	0	0	0	0	0	0	0	0	0	0	0	0	0	0	0	0	0	0	0	0	0	0	0	0	0	0	0	0	0	0	0	0	0	0	0	0	0	0
Pseudolabrys	0	0	0	0	0	0	0	0	0	0	0	0	0	0	0	0	0	0	0	0	0	0	0	0	0	0	0	0	0	0	0	0	0	0	0	0	0	0	0	0	0	0	0	0	0	0	0	0	0
Pseudomethylobacillus	0	0	0	0	0	0	0	0	0	0	0	0	0	0	0	0	0	0	0	0	0	0	0	0	0	0	0	0	0	0	0	0	0	0	0	0	0	0	0	0	0	0	0	0	0	0	0	0	0
Pseudomonas	0	0	0	0.0733313	0	0	0.0368581	0	0	0	0	0	0	0.0166465	0	0	0	0	0	0	0	0	0	0	0	0	0	0	0	0.150254	0	0	0	0	0	0	0	0	0	0	0	0	0	0	0	0	0	0	0
Pseudonocardia	0	0	0	0	0	0	0	0	0	0	0	0	0	0	0	0	0	0	0	0	0	0	0	0	0	0	0	0	0	0	0	0	0	0	0	0	0	0	0	0	0	0	0	0	0	0	0	0	0
Pseudopedobacter	0	0.0160972	0	0	0	0	0	0	0	0	0	0	0	0	0	0	0	0	0	0	0.0156597	0	0	0	0	0	0.015241	0	0.339848	0	0	0	0	0	0	0	0	0	0	0	0	0	0	0	0	0	0	0	0
Pseudopropionibacterium	0	0	0	0	0	0	0	0	0	0	0	0	0	0	0	0	0	0	0	0	0	0	0	0	0	0	0	0	0	0	0	0	0	0	0	0	0	0	0	0	0	0	0	0	0	0	0	0	0
Pseudoramibacter	0	0	0	0	0	0	0	0	0	0	0	0	0	0	0	0	0	0	0	0	0	0	0	0	0	0	0	0	0	0	0	0	0	0	0	0	0	0	0	0	0	0	0	0	0	0	0	0	0
Pseudoruminoccoccus	0.0295717	0	0	0	0	0	0	0	0.444342	0	0	0	0	0	0	0	0	0	1.30049	0	0	0	0	0	0	0	0	0	0	0	0	0	0	0	0	0	0	0	0	0	0	0	0	0	0	0	0	0	0
Pseudoscardovia	0	0	0	0	0	0	0	0	0	0	0	0	0	0	0	0	0	0	0	0	0	0	0	0	0	0	0	0	0	0	0	0	0	0	0	0	0	0	0	0	0	0	0	0	0	0	0	0	0
Pseudothermotoga	0.0536949	0	0	0	0	0	0	0	0	0	0	0	0	0	0	0	0	0	0	0	0	0	0	0	0	0	0	0.109999	0	0	0	0	0	0	0.026938	0	0	0	0	0	0	0	0	0	0	0	0	0	0
Pseudovibrio	0	0	0	0	0	0	0	0	0	0	0	0	0	0	0	0	0	0	0	0	0	0	0	0	0	0	0	0	0	0	0	0	0	0	0	0	0	0	0	0	0	0	0	0	0	0	0	0	0
Pseudoxanthomonas	0	0	0	0	0	0	0	0	0	0	0	0	0	0	0	0	0	0	0	0	0.0259832	0	0	0	0	0	0	0	0.128384	0	0	0	0	0.102622	0	0.0082655	0	0	0	0	0	0	0	0	0	0	0	0	0
Pseudozobellia	0	0	0	0	0	0	0	0	0	0	0	0	0	0	0	0	0	0	0	0	0	0	0	0	0	0	0	0	0	0	0	0	0	0	0	0	0	0	0	0	0	0	0	0	0	0	0	0	0
Psychrilyobacter	0	0	0	0	0	0	0	0	0	0	0	0	0	0	0	0	0	0	0	0	0	0	0	0	0	0	0	0	0.235009	0	0	0	0	0	0	0	0	0	0	0	0	0	0	0	0	0	0	0	0
Psychrobacillus	0.0201246	0	0	0	0	0	0	0.00848213	0	0	0	0	0	0	0	0	0	0	0	0	0	0	0	0	0	0	0	0	0	0	0	0	0	0	0	0	0	0	0	0	0	0	0	0	0	0	0	0	0
Psychrobacter	0	0	0	0	0	0	0	0	0	0	0	0	0	0	0	0	0	0	0	0	0	0	0	0	0	0	0	0	0	0	0	0	0	0	0	0	0	0	0	0	0	0	0	0	0	0	0	0	0
Psychroflexus	0	0	0	0	0	0	0	0	0	0	0	0	0	0	0	0	0	0	0	0	0	0	0	0	0	0	0	0.0155306	0	0	0	0	0	0	0	0	0	0	0	0	0	0	0	0	0	0	0	0	0
Psychromonas	0	0	0	0	0	0	0	0	0	0	0	0	0	0	0	0	0	0	0.103651	0	0	0	0	0	0	0	0	0	0	0	0	0	0	0	0	0	0	0	0	0	0	0	0	0	0	0	0	0	0
Psychroserpens	0	0	0	0	0	0	0	0	0	0	0	0	0	0	0	0	0	0	0	0	0	0	0	0	0	0	0	0	0	0	0	0	0	0	0	0	0	0	0	0	0	0	0	0	0	0	0	0	0
Pteropodidae	0	0	0	0	0	0	0	0	0	0	0	0	0	0	0	0	0	0	0.0997576	0	0	0	0	0	0	0	0	0	0	0	0	0	0	0	0	0	0	0	0	0	0	0	0	0	0	0	0	0	0
Pulicidae	0	0	0	0	0	0	0	0	0	0	0	0	0	0	0	0	0	0	0	0	0	0	0	0	0	0	0	0.148763	0	0	0	0	0	0	0	0	0	0	0	0	0	0	0	0	0	0	0	0	0
Puniceicoccaceae_norank	2.8803	0	0	0.215766	0	0	0	0	0	0.0945609	0	0	0	0	0	0	0	0.0911817	0	0	0.0201047	0	0.0887544	0	0	0	0.0371961	0	0	0	0	0	0	0	0	0.0343657	0	0.695209	0	0	0	0	0	0	0	0	0	0	0
Puniceicoccales_norank	0	0	0	0	0	0	0	0	0	0	0	0	0	0	0	0	0	0	0	0	0	0	0	0	0	0	0	0	0	0	0	0	0	0	0	0	0	0	0	0	0	0	0.0713851	0	0	0	0	0	0
Pusillimonas	0	0	0	0	0	0	0	0	0	0	0	0	0	0	0	0	0	0	0	0	0	0	0	0	0	0	0	0	0	0	0	0	0	0	0	0	0	0	0	0	0	0	0	0	0	0	0	0	0
Pustulibacterium	0	0	0	0	0	0	0	0	0	0	0	0	0	0	0	0	0	0	0	0	0	0	0	0	0	0	0	0.00970081	0	0	0	0	0	0	0	0	0	0	0	0	0	0	0	0	0	0	0	0	0
Puteibacter	0	0	0	0	0	0	0	0	0	0	0	0	0	0	0	0	0	0	0.0162993	0	0	0	0	0	0	0	0	0	0.611153	0	0	0	0	0	0	0	0	0.358164	0	0	0	0	0	0	0	0	0	0	0
Pygmaiobacter	0	0	0	0	0	0	0	0.0101101	0	0	0	0	0	0	0	0	0	0	0	0	0	0	0	0	0	0	0	0	3.3672	0	0	0	0	0	0	0	0	0	0	0	0	0	0	0	0	0	0	0	0
Pyralidae	0	0	0	0	0	0	0	0	0	0	0	0	0	0	0	0	0	0	0	0	0	0	0	0	0	0	0	0	0	0	0	0	0	0	0	0	0	0	0	0	0	0	0	0	0	0	0	0	0
Pyrinomonas	0.0226627	0	0	0.06722	0	0	0	0	0	0	0	0	0	0	0	0	0	0	0	0	0.558883	0	0	0	0	0	0	0	0.0638576	0	0	0	0	0	0	0	0	0	0	0	0	0	0	0	0	0	0	0	0
Pyrococcus	0	0	0	0	0	0	0	0	0	0	0	0	0	0	0	0	0	0	0	0	0	0	0	0	0	0	0	0.0578074	0	0	0	0	0	0	0	0	0	0	0	0	0	0	0	0	0	0	0	0	0
Pyroglyphidae	0	0	0	0	0	0	0	0	0	0	0	0	0	0	0	0	0	0	4.78834	0	0	0	0	0	0	0	0	0	0	0	0	0	0	0	0	0	0	0	0	0	0	0	0	0	0	0	0	0	0
Pythium	0	0	0	0	0	0	0	0	0	0	0	0	0	0	0	0	0	0	0.175418	0	0	0	0	0	0	0	0	0	0	0	0	0	0	0	0	0	0	0	0	0	0	0	0	0	0	0	0	0	0
Quadrisphaera	0	0	0	0	0	0	0	0	0	0	0	0	0	0	0	0	0	0	0	0	0	0	0	0	0	0	0	0	0	0	0	0	0	0	0	0	0	0	0	0	0	0	0	0	0	0	0	0	0
Rahnella	0	0	0	0	0	0	0	0	0	0	0	0	0	0	0	0	0	0	0.00732681	0	0	0	0	0	0	0	0	0	0	0.0103778	0	0	0	0	0	0	0	0	0	0	0	0	0	0	0	0	0	0	0
Raineya	0.0100989	0	0	0	0	0	0	0	0	0	0	0	0	0	0	0	0	0	0	0	0	0	0	0	0	0	0	0	0	0	0	0	0	0	0	0	0	0	0	0	0	0	0	0	0	0	0	0	0
Ranunculaceae	0	0	0	0	0	0	0	0	0	0	0	0	0	0	0	0	0	0	0	0	0	0	0	0	0	0	0	0	0	0	0	0	0	0	0	0	0	0	0	0	0	0	0	0	0	0	0	0	0
Raoultella	0	0	0	0	0	0	0	0	0	0	0	0	0	0	0	0	0	0	0	0	0	0	0	0	0	0	0	0	0	0	0	0	0	0	0	0	0	0.0275499	0	0	0	0	0	0	0	0	0	0	0
Raoultibacter	0	0	0	0	0	0	0	0	0	0	0	0	0	0	0	0	0	0	0	0	0	0	0	0	0	0	0	0	0	0	0	0	0	0	0	0	0	0	0	0	0	0	0	0	0	0	0	0	0
Rariglobus	0	0	0	0.126123	0	0	0	0	0	0	0	0	0	0	0	0	0	0	0	0	0	0	0	0	0	0	0	0	0	0	0	0	0	0	0	0	0	0	0	0	0	0	0	0	0	0	0.0561479	0	0
Rathayibacter	0	0	0	0	0	0	0	0	0	0	0	0	0	0	0	0	0	0	0	0	0	0	0	0	0	0	0	0	0	0	0	0	0	0	0	0	0	0	0	0	0	0	0	0	0	0	0	0	0
Reichenbachiella	0.0383416	0	0	0	0	0	0	0	0	0	0	0	0	0	0	0	0	0	0	0	0	0	0	0	0	0	0	0.0263846	0	0	0	0	0	0	0	0.0273257	0	0	0	0	0	0	0	0	0	0	0	0	0
Reinekea	0	0	0	0	0	0	0	0	0	0	0	0	0	0	0	0	0	0	0	0	0	0	0	0	0	0	0	0	0	0	0	0	0	0	0	0	0	0	0	0	0	0	0	0	0	0	0	0	0
Reticulomyxa	0	0	0	0	0	0	0	0	0	0	0	0	0	0	0	0	0	0	0	0	0	0	0	0	0	0	0	0	0	0	0	0	0	0	0	0	0	0	0	0	0	0	0	0	0	0	0	0	0
Reyranella	0	0	0	0	0	0	0	0	0	0	0	0	0	0	0	0	0	0	0	0	0	0	0	0	0	0	0	0	0	0	0	0	0	0	0	0	0	0	0	0	0	0	0	0	0	0	0	0	0
Rheinheimera	0	0	0	0	0	0	0	0	0	0.0493408	0	0	0	0	0	0	0	0	0	0	0	0	0	0	0	0	0	0	0	0	0	0	0	0	0	0	0	0	0	0	0	0	0	0	0	0	0	0	0
Rhizobacter	0	0	0	0	0	0	0	0	0	0	0	0	0	0	0	0	0	0	0	0	0.0359843	0	0	0	0	0	0	0	0	0	0	0	0	0	0	0	0	0	0	0	0	0	0	0	0	0	0.0719094	0	0
Rhizobiales_norank	0	0	0	0	0	0	0	0	0	0	0	0	0	0	0	0	0	0	0	0	0.0372363	0	0	0	0	0	0	0	0	0	0	0	0	0	0	0	0	0	0	0	0	0	0	0	0	0	0	0	0
Rhizobium	0	0	0	0	0	0	0	0	0	0	0	0	0	0	0	0	0	0	0	0	0	0	0	0	0	0	0	0	0	0.0218409	0	0	0	0	0.0522331	0.0198287	0	0.0286189	0	0	0	0	0	0.126422	0	0	0	0	0
Rhizopodaceae	0	0	0	0	0	0	0	0	0	0	0	0	0	0	0	0	0	0	0	0	0	0	0	0	0	0	0	0	0	0	0	0	0	0	0	0	0	0	0	0	0	0	0	0	0	0	0	0	0
Rhodanobacter	0.16638	0.135753	0	0.0679216	0	0	0.0529788	0.0928855	0	0	0	0	0	0	0	0	0	0	0.0722147	0.010359	0.260052	0	0	0	0	0	0	0	0	0.0910013	0	0	0	0.183569	0	0	0	0	0	0	0.0785119	0	0	0	0	0	0	0	0.176123
Rhodobacter	0	0	0	0.0238461	0	0	0	0	0	0	0	0	0	0	0	0	0	0	0	0	0	0	0	0	0	0	0	0	0	0	0	0	0	0	0	0	0	0	0	0	0	0	0	0	0	0	0	0	0
Rhodobacteraceae_norank	0	0	0	0.0464347	0	0	0.0196556	0	0	0	0	0	0	0	0	0	0	0	0	0	0	0	0	0	0	0	0	0	0.0727211	0	0	0	0	0	0	0	0	0	0	0	0	0	0	0	0	0	0	0	0
Rhodobacterales_norank	0	0	0	0	0	0	0	0	0	0	0	0	0	0	0	0	0	0	0	0	0	0	0	0	0	0	0	0	0	0	0	0	0	0	0	0	0	0	0	0	0	0	0	0	0	0	0	0	0
Rhodobiaceae_norank	0	0	0	0.0335706	0	0	0	0	0	0	0	0	0	0	0	0	0	0	0	0	0	0	0	0	0	0	0	0	0	0	0	0	0	0	0	0	0	0	0	0	0	0	0	0	0	0	0	0	0
Rhodococcus	0	0	0	0	0	0	0	0	0	0	0	0	0	0	0	0	0	0	0	0	0.078307	0	0	0	0	0	0	0	0	0.0177849	0	0	0	0	0	0	0	0.0377958	0	0	0	0	0	0	0	0	0	0	0
Rhodocyclaceae_norank	0	0	0	0.0259241	0	0	0	0	0	0	0	0	0	0	0	0	0	0	0	0	0	0	0	0	0	0	0	0	0	0	0	0	0	0	0	0	0	0	0	0	0	0	0	0	0	0	0	0	0
Rhodocyclus	0	0	0	0	0	0	0	0	0	0	0	0	0	0	0	0	0	0	0	0	0	0	0	0	0	0	0	0	0	0	0	0	0	0	0	0	0	0	0	0	0	0	0	0	0	0	0	0	0
Rhodocytophaga	0	0	0	0	0	0	0	0	0	0	0	0	0	0	0	0	0	0	0	0	0.30832	0	0	0	0	0	0.0986808	0.133362	0	0	0	0	0	0	0	0	0	0	0	0	0	0	0	0	0	0	0	0	0
Rhodoferax	0	0	0	0	0	0	0	0	0	0	0	0	0	0	0	0	0	0	0	0	0	0	0	0	0	0	0	0	0	0	0	0	0	0	0	0	0	0	0	0	0	0	0	0	0	0	0	0	0
Rhodohalobacter	0.150274	0	0	0	0	0	0	0	0	0.0914731	0	0	0	0	0	0	0	0	0	0	0	0	0	0	0	0	0	0	0	0	0	0	0	0	0	0	0	0	0	0	0	0	0	0	0	0	0	0	0
Rhodopirellula	0	0	0	0.335003	0	0	0	0	0	0	0	0	0	0	0	0	0	0	0	0	0.458755	0	0	0	0	0	0.0225118	0	0.368026	0	0	0	0	0.161342	0	0	0	0.0364354	0	0	0	0	0	0	0	0	0	0	0
Rhodospirillaceae_norank	0	0	0	0	0	0	0	0	0	0	0	0	0	0	0	0	0	0	0	0	0	0	0.271394	0	0	0	0	0	0	0	0	0	0	0	0	0	0	0	0	0	0	0	0	0	0	0	0	0	0
Rhodospirillales_norank	0	0	0	0	0	0	0	0	0	0	0	0	0	0	0	0	0	0	0	0	0	0	0	0	0	0	0	0	0	0	0	0	0	0	0	0	0	0	0	0	0	0	0	0	0	0	0	0	0
Rhodothermaceae_norank	0	0	0	0.0202533	0	0	0	0	0	0	0	0	0	0	0	0	0	0	0	0	0	0	0	0	0	0	0	0.0348839	0	0	0	0	0	0	0	0	0	0	0	0	0	0	0	0	0	0	0	0	0
Rhodothermaeota_norank	0	0	0	0	0	0	0	0	0	0	0	0	0	0	0	0	0	0	0	0	0	0	0	0	0	0	0	0	0	0	0	0	0	0	0	0	0	0	0	0	0	0	0	0	0	0	0	0	0
Rhodovastum	0	0	0	0	0	0	0	0	0	0	0	0	0	0	0	0	0	0	0	0	0	0	0	0	0	0	0	0	0	0	0	0	0	0	0	0	0	0	0	0	0	0	0	0	0	0	0	0	0
Rhodovulum	0	0	0	0	0	0	0	0	0	0	0	0	0	0	0	0	0	0	0	0	0	0	0	0	0	0	0	0	0	0	0	0	0	0	0	0	0	0	0	0	0	0	0	0	0	0	0	0	0
Rhopaluridae	0	0	0	0	0	0	0	0	0	0	0	0	0	0	0	0	0	0	0	0	0	0	0	0	0	0	0	0	0	0	0	0	0	0	0	0	0	0	0	0	0	0	0	0	0	0	0	0	0
Richelia	0	0	0	0	0	0	0	0	0	0	0	0	0	0	0	0	0	0	0	0	0	0	0	0	0	0	0	0	0	0	0	0	0	0	0	0	0	0	0	0	0	0	0	0	0	0	0.0136465	0	0
Rickettsiales_norank	0.0171564	0	0	0	0	0	0	0	0	0	0	0	0	0	0	0	0	0	0.0325121	0	0	0	0	0	0	0	0	0	0	0.0893232	0	0	0	0	0	0	0	0	0	0	0	0	0	0	0	0	0	0	0
Rikenella	0	0	0	0	0	0	0	0	0	0	0	0	0	0	0	0	0	0	0	0.857249	0	0	0	0	0	0	3.61468	0	0.208251	0	0	0	0	0	0	0	0	0	0	0	0	0	0	0	0	0	0	0	0
Rikenellaceae_norank	59.4698	15.2918	0	25.728	0	3.23621	0	0	0	0.255466	0	2.25598	0.627479	0	0	0.0162886	0	0	12.2796	0.203679	50.0607	0	0.150888	1.47718	0	0	0	15.3376	44.5047	1.12131	0.0310512	0	0	0	0	27.5382	3.32124	0.591916	0	0	0	0	0	0	0	0	0	0	0.293969
Robertkochia	0.0677169	0	0	0	0	0	0	0	0	0	0	0	0	0	0	0	0	0	0	0	0.0333151	0	0	0	0	0	0	0	0	0	0	0	0	0	0	0	0	0	0	0	0	0	0	0	0	0	0	0	0
Robiginitalea	0	0	0	0	0	0	0	0	0	0	0	0	0	0	0	0	0	0	0	0	0	0	0	0	0	0	0	0	0	0	0	0	0	0	0	0	0	0.0110415	0	0	0	0	0	0	0	0	0	0	0
Robinsoniella	6.0516	0.140601	0	0.161592	0	0.405656	0	0.136273	0	0	0	0	0	0	0	0	0	0.0563896	0.82173	0.0329874	3.39794	0	0.0290081	0	0.164954	0.0343016	0.595294	0	1.33612	0	0.218274	0	0	0	0.0857036	0.111274	0	4.72594	0	0	0	0	0	0	0	0	0	0	0
Rodentibacter	0	0	0	0	0	0	0	0	0	0	0	0	0	0	0	0	0	0	0	0	0	0	0	0	0	0	0	0	0.0683587	0	0	0	0	0	0	0	0	0	0	0	0	0	0	0	0	0	0	0	0
Romboutsia	2.24217	0	0	0	0	0	0	0.26209	0	0	0	0	0	0	0	0	0	0	0.236639	0	0.0422553	0	0	0	0	0	0	0.0504937	9.90631	0	0.579969	0	0	0	0	0	0.34279	0	0	0	0	0	0	0	0	0	0	0	0
Rosaceae	0	0	0	0	0	0	0	0.0257591	0	0	0	0	0	0	0	0	0	0	0	0	0	0	0	0	0	0	0	0	0	0	0	0	0	0	0	0	0	0	0	0	0	0	0	0	0	0	0	0	0
Roseateles	0	0	0	0	0	0	0	0	0	0	0	0	0	0	0	0	0	0.242148	0	0	0	0	0	0	0	0	0	0	0	0	0	0	0	0	0	0	0	0	0	0	0	0	0	0	0	0	0	0	0
Roseburia	18.8783	1.23731	0	1.41481	0	2.43032	5.40526	4.87971	0.0171393	2.34621	0.0245255	3.24286	0	1.02787	0	0.290612	0	2.42942	8.46443	2.36149	21.7505	0	3.76749	0	0	1.18061	0	0.830443	64.6895	2.8399	1.71723	0	0	0.0325729	1.19177	2.63262	4.77157	2.58408	0	0.0331572	0	0	0	0.835264	0	0	5.89598	0	0
Roseibaca	0	0	0	0.0282889	0	0	0	0	0	0	0	0	0	0	0	0	0	0	0	0	0	0	0	0	0	0	0	0	0	0	0	0	0	0	0	0	0	0	0	0	0	0	0	0	0	0	0	0	0
Roseibacillus	0	0	0	0	0	0	0	0	0	0	0	0	0	0	0	0	0	0	0	0	0	0	0	0	0	0	0.033388	0	0	0	0	0	0	0	0	0	0	0	0	0	0	0	0	0	0	0	0	0	0
Roseiflexus	0	0	0	0	0	0	0.0612006	0	0	0	0	0	0	0	0	0	0	0	0	0	0	0	0	0	0	0	0	0	0	0	0	0	0	0	0	0	0	0.0232495	0	0	0	0	0	0	0	0	0	0	0
Roseimaritima	0	0	0	0	0	0	0	0	0	0	0	0	0	0	0	0	0	0	0	0	0	0	0	0	0	0	0.0566277	0.0139864	0	0	0	0	0	0	0	0	0	0	0	0	0	0	0	0	0	0	0	0	0
Roseimicrobium	0	0	0	0	0	0	0	0	0	0	0	0	0	0	0	0	0	0	0	0	0	0	0	0	0	0	0	0	0	0	0	0	0	0	0	0	0	0	0	0	0	0	0	0	0	0	0	0	0
Ruania	0	0	0	0	0	0	0	0	0	0	0	0	0	0	0	0	0	0	0	0	0	0	0	0	0	0	0	0	0	0	0	0	0	0	0	0	0	0	0	0	0	0	0	0	0	0	0	0	0
Rubinisphaera	0	0	0	0.125427	0	0	0	0	0	0	0	0	0	0	0	0	0	0	0	0	0	0	0	0	0	0	0	0	0	0	0	0	0	0.0273996	0	0	0	0	0	0	0	0	0	0	0	0	0	0	0
Rubneribacter	0	0	0	0	0	0	0	0	0	0	0	0	0	0	0	0	0	0	0	0	0	0	0	0	0	0	0	0	0	0	0	0	0	0	0	0	0	0	0	0	0	0	0	0	0	0	0	0	0
Rubripirellula	0	0	0	0.305027	0	0	0	0	0	0	0	0	0	0	0	0	0	0	0	0	0	0	0	0	0	0	0	0.452607	0	0	0	0	0	0	0	0	0	0	0	0	0	0	0	0	0	0	0	0	0
Rubritalea	0	0	0	0	0	0	0	0	0	0.0223572	0	0	0	0	0	0	0	0	0	0	0	0	0	0	0	0.0684147	0	0	0	0	0	0	0	0	0	0	0	0	0	0	0	0	0	0	0	0	0.0167608	0	0
Rubrivirga	0	0	0	0.201955	0	0	0	0	0	0.01967	0	0	0	0	0	0	0	0	0	0	0	0	0	0	0	0	0	0	0	0	0	0	0	0	0	0	0	0	0	0	0	0	0	0	0	0	0	0	0
Rubrivivax	0	0	0	0	0	0	0	0	0	0	0	0	0	0	0	0	0	0	0.0125846	0	0	0	0	0	0	0	0	0	0	0	0	0	0	0	0	0	0	0	0	0	0	0	0	0	0	0	0	0	0
Rubrobacter	0	0	0	0.0178311	0	0	0	0	0	0	0	0	0	0	0	0	0	0	0	0	0	0	0	0	0	0	0	0	0	0	0	0	0	0	0	0	0	0	0	0	0	0	0	0	0	0	0	0	0
Rudaea	0	0	0	0	0	0	0	0	0	0	0	0	0	0	0	0.188038	0	0	0	0	0	0	0	0	0	0	0	0	0	0	0	0	0	0	0	0	0	0	0	0	0	0	0	0	0	0	0	0	0
Rudanella	0	0	0	0	0	0	0	0	0	0	0	0	0	0	0	0	0	0	0	0	0	0	0	0	0	0	0	0	0	0	0	0	0	0	0.21409	0	0	0.0649583	0	0	0	0	0	0	0	0	0	0	0
Rufibacter	0	0	0	0	0	0	0	0	0	0	0	0	0	0	0	0	0	0	0	0.0654969	0.0886336	0	0.0392271	0	0	0	0	0	0	0	0	0	0	0	0	0	0.00979713	0	0	0	0	0	0	0	0	0	0.0391435	0	0
Rugamonas	0	0	0	0	0	0	0	0	0	0	0	0	0	0	0	0	0	0	0	0	0	0	0	0	0	0	0	0	0.0269819	0	0	0	0	0	0	0	0	0	0	0	0	0	0	0	0	0	0	0	0
Ruminiclostridium	0.861501	0.249229	0	0.231602	0	0.054606	0.94024	0.015434	0	0.339217	0.132734	0.653731	0	0.0359034	0	0.20741	0	0.468527	2.1559	0	1.79953	0.124212	0.969769	0	0.0907098	0.0563898	0.423126	0.0531677	17.8411	0.0869333	0.326266	0	0	0	1.41456	1.05746	0.0215712	4.54379	0	0	0	0	0	0	0	0	0.483967	0	0
Ruminobacter	0	0	0	0	0	0	0	0	0	0	0	0	0	0	0	0	0	0	0	0	0	0	0	0	0	0	0	0	0	0	0	0	0	0	0	0	0	0	0	0	0	0	0	0	0	0	0	0	0
Ruminococcaceae_norank	128.754	47.1512	0	83.7784	0	15.8428	33.558	2.19051	9.25931	18.5696	0.0626483	10.4126	0.224846	0.400935	0.0303435	4.39224	0	6.70174	74.5322	29.5288	85.4674	0.235517	13.7707	0	0.24489	18.1768	21.9105	98.4739	96.3738	56.0551	6.99685	0	0	10.8841	4.01398	47.0245	5.78949	108.038	0.0303435	0.513471	0	0	0	0.177678	0	0.141274	3.13235	0	0.421974
Ruminococcus	47.3883	37.617	5.13343	103.498	0	70.8914	20.2471	2.29419	15.02	48.5712	36.0883	0	0.330907	1.36238	0.212643	3.62482	0	9.30501	16.6403	4.11182	121.978	5.37934	3.5358	0	2.6646	5.6117	25.2195	34.7134	58.951	6.19264	8.55789	0	0	0.13266	5.47302	19.0111	4.66281	30.3467	0.212643	0.471852	0	0	0	0.0675625	0	0.127902	27.6446	0	0
Runella	0.0151393	0	0	4.16749	0	0	0	0	0	0	0	0	0	0	0	0	0	0	0.0311646	1.50861	0	0	0	0	0	0	0	0	0	0	0.201258	0	0	0	0	0.492005	0	0	0	0	0	0	0	0	0	0	1.25406	0	0
Ruthenibacterium	11.1595	0.0200464	0	0.300582	0	0.020768	0	0.666625	0	0	0	0	0	0	0	0	0	0	0.207562	0	0.963342	0	0	0	0	0	0	0	0.352837	0	0.236249	0	0	0	0.205898	0	0	0.0488668	0	0	0	0	0	0	0	0	0	0	0
Saccharibacillus	0.187284	0.487813	0	0	0	0	0	0	0	0.0280273	0	0	0	0	0	0	0	0.0184002	0.0611098	0.0461288	0.266523	0	0	0	0	0.0758458	0.444543	0	0	0	0	0	0	0	0	0	0	0.0483471	0	0	0	0	0	0	0	0	0	0	0
Saccharicrinis	0	0	0	0.0368021	0	0	0	0	0	0	0	0	0	0	0	0	0	0	0	0	0	0	0	0	0	0	0	0	0.205447	0	0	0	0	0	0	0	0	0	0	0	0	0	0	0	0	0	0	0	0
Saccharomonospora	0	0	0	0	0	0	0	0	0	0	0	0	0.0944721	0	0	0	0	0	0	0	0	0	0	0	0	0	0	0	0	0	0	0	0	0	0	0	0	0	0	0	0	0	0	0	0	0	0	0	0
Saccharomycetaceae	0	0	0	0	0	0	0	0	0	0	0	0	0	0	0	0	0	0	0	0	0	0	0	0	0	0	0	0	0	0	0	0	0	0	0	0	0	0	0	0	0	0	0	0	0	0	0	0	0
Saccharophagus	0	0	0	0	0	0	0	0	0	0	0	0	0	0	0	0	0	0	0	0	0.0194857	0	0	0	0	0	0	0	0	0	0	0	0	0	0	0	0	0	0	0	0	0	0	0	0	0	0	0	0
Salegentibacter	0	0	0	0	0	0	0	0	0	0.0616153	0	0	0	0	0	0	0	0	0.0554525	0	0.0392279	0	0	0	0	0	0	0.0381903	0	0	0	0	0	0	0	0	0	0	0	0	0	0	0	0	0	0.547235	0	0	0
Salibacterium	0	0	0	0	0	0	0	0	0	0	0	0	0	0	0	0	0	0	0	0	0	0	0	0	0	0	0	0	0.016421	0	0	0	0	0	0	0	0	0	0	0	0	0	0	0	0	0	0	0	0
Salicaceae	0	0	0	0	0	0	0	0	0	0	0	0	0	0	0	0	0	0	0.306444	0	0	0	0	0	0	0	0	0	0	0	0	0	0	0	0	0	0	0	0	0	0	0	0	0	0	0	0	0	0
Salimicrobium	0	0	0	0	0	0	0	0	0	0	0	0	0	0	0	0	0	0	0	0	0	0	0	0	0	0	0	0	0	0	0	0	0	0	0	0	0	0	0	0	0	0	0	0	0	0	0	0	0
Salinarimonas	0	0	0	0	0	0	0	0	0	0	0	0	0	0	0	0	0	0	0	0	0	0	0	0	0	0	0	0.175548	0	0	0	0	0	0	0	0	0	0	0	0	0	0	0	0	0	0	0	0	0
Salinibacillus	0	0	0	0	0	0	0	0	0	0	0	0	0	0	0	0	0	0	0	0	0	0	0	0	0	0	0	0	0	0	0	0	0	0	0	0	0	0	0	0	0	0	0	0	0	0	0	0	0
Salinibacter	0	0	0	0	0	0	0	0	0	0	0	0	0	0	0	0	0	0	0	0	0	0	0	0	0	0	0	0.204067	0	0	0	0	0	0	0	0	0	0	0	0	0	0	0	0	0	0	0	0	0
Salinicoccus	0.0763708	0	0	0	0	0	0	0	0	0	0	0	0	0	0	0	0	0	0	0	0	0	0	0	0	0	0	0	0	0	0	0	0	0	0	0	0	0	0	0	0	0	0	0	0	0	0	0	0
Salinicola	0	0	0	0	0	0	0	0	0	0	0	0	0	0	0	0	0	0	0	0	0	0	0	0	0	0	0	0	0	0	0	0	0	0	0	0	0	0	0	0	0	0	0	0	0	0	0	0	0
Salinimicrobium	0	0	0	0	0	0	0	0	0	0	0	0	0	0	0	0	0	0	0	0	0	0	0	0	0	0	0	0.585301	0	0	0	0	0	0	0	0	0	0	0	0	0	0	0	0	0	0	0	0	0
Salinivirga	0	0	0	8.00336	0	0	0	0	0	0	0	0	0	0	0	0	0	0	0	0	0	0	0	0	0	0	0	0	0	0	0	0	0	0	0	0	0	0	0	0	0	0	0	0	0	0	0	0	0
Salipaludibacillus	0	0	0	0.0273277	0	0	0	0	0	0	0	0	0	0	0	0	0	0	0	0	0	0	0	0	0	0	0	0	0	0	0	0	0	0	0	0	0	0.0121646	0	0	0	0	0	0	0	0	0	0	0.0429009
Saliphagus	0	0	0	0	0	0	0	0	0	0	0	0	0	0	0	0	0	0	0	0	0	0	0	0	0	0	0	0	0	0	0	0	0	0	0	0	0	0	0	0	0	0	0	0	0	0	0	0	0
Saliterribacillus	0	0	0	0	0	0	0	0	0	0	0	0	0	0	0	0	0	0	0	0	0.239241	0	0.03167	0	0	0	0	0	0.0918474	0	0	0	0	0	0	0	0	0.0454511	0	0	0	0	0	0	0	0	0	0	0
Salmonella	0	0	0	0	0	0	0	0	0	0	0	0	0	0	0	0	0	0	0.0327249	0	0	0	0	0	0	0	0	0	0	0	0	0	0	0	0	0	0	0	0	0	0	0	0	0	0	0	0.0758933	0	0
Salpingoeca	0	0	0	0	0	0	0	0	0	0	0	0	0	0	0	0	0	0	0	0	0	0	0	0	0	0	0	0	0	0	0	0	0	0	0	0	0	0	0	0	0	0	0	0	0	0	0	0	0
Salsuginibacillus	0	0	0	0	0	0	0	0	0	0	0	0	0	0	0	0	0	0	0	0	0	0	0	0	0	0	0	0	0	0	0	0	0	0	0	0	0	0	0	0	0	0	0	0	0	0	0	0	0
Sanguibacter	0.0591694	0	0	0	0	0	0	0	0	0	0	0	0	0	0	0	0	0	0	0	0	0	0	0	0	0	0	0	0	0	0	0	0	0	0	0	0	0	0	0	0	0	0	0	0	0	0	0	0
Sanguibacteroides	0.0201861	0	0	0	0	0	0	0	0	0	0	0	0	0	0	0	0	0	0	0	0	0	0	0	0	0	0	0	0	0	0	0	0	0	0	0	0	0	0	0	0	0	0	0	0	0	0	0	0
Sapindaceae	0	0	0	0	0	0	0	0	0	0	0	0	0	0	0	0	0	0	0	0	0	0	0	0	0	0	0	0	0	0	0	0	0	0	0	0.0384738	0	0	0	0	0	0	0	0	0	0	0	0	0
Saprospirales_norank	0	0	0	0	0	0	0	0	0	0	0	0	0	0	0	0	0	0	0	0	0	0	0	0	0	0	0	0.0120782	0	0	0	0	0	0	0	0	0	0	0	0	0	0	0	0	0	0	0	0	0
Sarcina	0.325388	0	0	0	0	0	0.380516	0.231635	0	0	0	0	0	0	0	0	0	0	0	0	0	0	0	0	0	0	0	0	2.65277	0.221231	0	0	0	0	0.55658	0	0	0	0	0	0.328945	0	0	0	0	0	0.0354051	0	0
Sarcoptidae	0	0	0	0	0	0	0	0	0	0	0	0	0	0	0	0	0	0	0.0584946	0	0	0	0	0	0	0	0	0	0	0	0	0	0	0	0	0	0	0	0	0	0	0	0	0	0	0	0	0	0
Schaalia	0	0	0	0	0	0	0	0	0	0	0	0	0	0	0	0	0	0	0	0	0	0	0	0	0	0	0	0	0	0	0.0333649	0	0	0	0	0	0	0	0	0	0	0	0	0	0	0	0	0	0
Schaedlerella	0.982787	0	0	0.139229	0	0	0	0.343607	0	0	0	0	0	0	0	0.0550121	0	0	0.356188	0	0.190967	0	0	0	0	0	0	0	0.4891	0.503543	0.222614	0	0	0	0	0	0	0.509518	0	0	0	0	0	0	0	0	0	0	0
Schistosomatidae	0	0	0	0	0	0	0	0	0	0	0	0	0	0	0	0	0	0	0.0246019	0	0	0	0	0	0	0	0	0	0	0	0	0	0	0	0	0	0	0	0	0	0	0	0	0	0	0	0	0	0
Schleiferia	0	0	0	0	0	0	0	0	0	0	0	0	0	0	0	0	0	0	0	0	0	0	0	0	0	0	0	0.213639	0	0	0	0	0	0	0	0	0	0	0	0	0	0	0	0	0	0	0	0	0
Schlesneria	0	0	0	0.0179293	0	0	0	0	0	0	0	0	0	0	0	0	0	0	0	0	0	0	0	0	0	0	0	0	0	0	0	0	0	0	0	0	0	0	0	0	0	0	0	0	0	0	0	0	0
Schwartzia	0	0	0	0	0	0	0	0	0	0	0	0	0	0	0	0	0	0	0	0	0	0	0	0	0	0	0	0	0	0	0	0	0	0	0	0	0	0	0	0	0	0	0	0	0	0	0	0	0
Scopulibacillus	0	0	0	0	0	0	0	0	0	0	0	0	0	0	0	0	0	0	0	0	0	0	0	0	0	0	0	0	0.187586	0	0	0	0	0	0	0	0	0	0	0	0	0	0	0	0	0	0	0	0
Scytonema	0	0	0	0	0	0	0	0	0	0.0136668	0	0	0	0	0	0	0	0	0	0	0	0	0	0	0	0	0	0	0	0	0	0	0	0	0	0	0	0	0	0	0	0	0	0	0	0	0	0	0
Sebaldella	0	0	0	0	0	0	0	0	0	0	0	0	0	0	0	0	0	0	0	0	0	0	0	0	0	0	0	0	0.0253705	0	0	0	0	0	0	0	0	0	0	0	0	0	0	0	0	0	0	0	0
Sedimentibacter	0	0	0	0.0724883	0	0	0	0	0	0	0	0	0	0	0	0	0	0.798344	0	0	0.0397543	0	0	0	0	0	0	0	0	0	0	0	0	0	0	0	0	0	0	0	0	0	0	0	0	0	0	0	0
Sedimentisphaera	0	0	0	0	0	0	0	0.00924994	0	0	0	0	0	0	0	0.0597018	0	0	0	0	0.158936	0	0	0	0	0	0	0.0166466	0.0546491	0	0	0	0	0	0.0949824	0	0	0	0	0	0	0	0	0	0	0	0	0	0
Sediminibacillus	0	0	0	0	0	0	0	0	0	0.0176094	0	0	0	0	0	0	0	0	0.202174	0.0832989	0.0321943	0	0	0	0	0.04126	0	0	0.0273653	0	0.102083	0	0	0	0	0	0	0	0	0	0	0	0	0	0	0	0	0	0
Sediminibacterium	0	0.0359584	0	0	0	0	0	0.0643652	0	0	0	0	0	0	0	0	0	0	0	0	0	0	0	0	0	0	0.0173023	0	0	0	0	0	0	0	0.276814	0	0	0	0	0.0798586	0	0	0	0	0	0	0	0	0
Sediminicola	0	0	0	0	0	0	0	0	0	0	0	0	0	0	0	0	0	0	0.0137292	0	0.062762	0	0	0	0	0	0	0	0	0	0	0	0	0	0	0	0	0	0	0	0	0	0	0	0	0	0	0	0
Sediminispirochaeta	0	0	0	0	0	0	0	0	0	0	0	0	0	0	0	0	0	0	0	0	0	0	0	0	0	0	0	0	0	0	0	0	0	0	0	0	0	0	0	0	0	0	0	0	0	0	0	0	0
Sediminitomix	0	0	0	0	0	0	0	0	0	0	0	0	0	0	0	0	0	0	0	0	0	0	0	0	0	0	0	0.190798	0	0	0	0	0	0	0	0	0	0	0	0	0	0	0	0	0	0	0	0	0
Segetibacter	0	0	0	0	0	0.296982	0	0	0	0	0	0	0	0	0	0	0	0	0.058181	0	0	0	0	0	0	0	0	0	0.121953	0	0.173279	0	0	0	0.0772627	0	0	0.0682298	0	0	0	0	0	0	0	0	0	0	0
Selaginellaceae	0	0	0	0	0	0	0	0	0	0	0	0	0	0	0	0	0	0	0	0	0	0	0	0	0	0	0	0	0	0	0	0	0	0	0	0	0	0	0	0	0	0	0	0	0	0	0	0	0
Selenastraceae	0	0	0	0	0	0	0	0	0	0	0	0	0	0	0	0	0	0	0	0	0	0	0	0	0	0	0	0	0	0	0	0	0	0	0	0	0	0	0	0	0	0	0	0	0	0	0	0	0
Selenihalanaerobacter	0	0	0	0	0	0	0	0	0	0	0	0	0	0	0	0	0	0	0	0	0	0	0	0	0	0	0	0	0	0	0	0	0	0	0	0	0	0	0	0	0	0	0	0	0	0	0	0	0
Selenomonadales_norank	0	0	0	0	0	0	0.109289	0	0	0	0	0	0	0	0	0	0	0	0	0	0	0	0	0	0	2.55871	0	0	0.166483	0	0	0	0	0	0	0	0	0.538777	0	0	0	0	0	0	0	0	0	0	0
Selenomonas	2.81701	0	0	0.0397969	0	0.236699	0	1.96534	0	0	0	0	0	0	0	0	0	0	0	0	0.467818	0	0	0	0	0	0	0.184031	0.461979	0	0	0	0	0	0	0	0.281644	0.23526	0	0	0	0	0	0	0	0	0	0	0
Sellimonas	0	0	0	0	0	0	0	0	0	0	0	0	0	0	0	0	0	0.0413256	0.0214814	0	0	0	0	0	0	0	0	0	0.0385895	0	0	0	0	0	0	0	0	0	0	0	0	0	0	0	0	0	0	0	0
Senegalia	0	0	0	0	0	0	0	0	0	0	0	0	0	0	0	0	0	0	0	0	0	0	0	0	0	0	0	0	0.0226417	0	0	0	0	0	0	0	0	0	0	0	0	0	0	0	0	0	0	0	0
Senegalimassilia	0	0	0	0	0	0	0	0	0	0	0	0	0	0	0	0	0	0	0	0	0	0	0	0	0	0	0	0.396517	0	0	0	0	0	0	0	0	0	0	0	0	0	0	0	0	0	0	0	0	0
Seonamhaeicola	0	0	0	0	0	0	0	0	0	0	0	0	0	0	0	0	0	0	0	0	0	0	0	0	0	0	0	0	0.0237794	0	0	0	0	0	0	0.0729246	0	0	0	0	0	0	0	0	0	0	0	0	0
Serendipitaceae	0	0	0	0	0	0	0	0	0	0	0	0	0	0	0	0	0	0	0	0	0.0147972	0	0	0	0	0	0	0	0	0	0	0	0	0	0	0	0	0	0	0	0	0	0	0	0	0	0	0	0
Serratia	0	0	0	0	0	0	0	0	0	0	0	0	0	0	0	0	0	0	0	0	0	0	0	0	0	0	0	0	0	0.102333	0	0	0	0	0	0	0	0	0	0	0	0	0	0	0	0	0	0	0
Sharpea	0	0	0	0	0	0	0	0.0437167	0	0	0	0	0	0	0	0	0	0	0	0	0	0	0	0	0	0	0	0.0174515	0.026688	0	0	0	0	0	0	0	0	0.282455	0	0	0	0	0	0	0	0	0	0	0
Shewanella	0	0	0	0	0	0	0	0	0	0	0	0	0	0	0	0	0	0	0.0208338	0	0.0290896	0	0	0	0	0	0	0	0.126713	0	0	0	0	0	0	0	0	0	0	0	0	0	0	0	0	0	0	0	0
Shigella	0.128141	0	0	0	0	0	0	0	0	0	0	0	0	0	0	0	0	0	0.185495	0	0	0	0	0	0	0	0	0	0	0	0	0	0	0	0	0	0	0	0	0	0	0	0	0	0	0	0	0	0
Shuttleworthia	0.328954	0	0	0	0	0	0	0	0	0	0	0	0	0	0	0	0	0	0	0	0	0	0	0	0	0	0	0	0	0	0	0	0	0	0	0	0	0.019309	0	0	0	0	0	0	0	0	0	0	0
Siccationidurans	0	0	0	0.124849	0	0	0	0	0	0.0654306	0	0	0	0	0	0	0	0	0	0	0	0	0	0	0	0	0	0	0	0	0	0	0	0	0	0	0	0	0	0	0	0	0	0	0	0	0	0	0
Sigmoideomycetaceae	0	0	0	0	0	0	0	0	0	0	0	0	0	0	0	0	0	0	0	0	0	0	0	0	0	0	0	0	0	0	0	0	0	0	0	0	0	0	0	0	0	0	0	0	0	0	0	0	0
Silphidae	0	0	0	0	0	0	0	0	0	0	0	0	0	0	0	0	0	0	0	0	0	0	0	0	0	0	0	0	0	0	0	0	0	0	0	0	0	0	0	0	0	0	0	0	0	0	0	0	0
Silviavirus	0	0	0	0	0	0	0	0	0	0	0	0	0	0	0	0	0	0	0	0	0	0	0	0	0	0	0	0	0	0	0	0	0	0	0	0	0	0	0	0	0	0	0	0	0	0	0	0	0
Silvibacterium	0	0	0	0	0	0	0	0	0	0	0	0	0	0	0	0	0	0	0	0	0.0429578	0	0	0	0	0	0	0	0	0	0	0	0	0	0	0	0	0	0	0	0	0	0	0	0	0	0	0	0
Singulisphaera	0	0	0	0	0	0	0	0	0	0	0	0	0	0	0	0	0	0	0	0	0	0	0	0	0	0	0	0	0	0	0	0	0	0	0	0	0	0	0	0	0	0	0	0	0	0	0	0	0
Sinobaca	0	0	0	0	0	0	0	0	0	0	0	0	0	0	0	0	0	0	0	0	0	0	0	0	0	0	0	0	0	0	0.00712525	0	0	0	0	0	0	0	0	0	0	0	0	0	0	0	0	0	0
Sinomicrobium	0	0	0	0.0478758	0	0	0	0	0	0	0	0.315073	0	0	0	0	0	0	1.56408	0.150597	0.0143088	0	0	0	0	0	0	0.0454024	0	0	0	0	0	0	0	0.147471	0	0.0966208	0	0	0	0	0	0	0	0	0	0	0
Sinomonas	0	0	0	0	0	0	0	0	0	0	0	0	0	0	0	0	0	0	0.106943	0	0	0	0	0	0	0	0	0	0	0	0	0	0	0	0	0	0	0	0	0	0	0	0	0	0	0	0	0	0
Sinorhizobium	0	0	0	0	0	0	0.031439	0	0	0	0	0	0	0	0	0	0	0	0	0	0	0	0	0	0	0	0	0.0979186	0	0	0	0	0	0	0	0	0	0	0	0	0	0	0	0	0	0	0	0	0
Siphonobacter	0	0.0811723	0	0	0	0	0	0	0	0	0	0	0	0	0	0	0	0	0	0	0	0	0	0	0	0	0.0317137	0.0544892	0	0	0	0	0	0	0	0	0	0.0451741	0	0	0	0	0	0	0	0	0	0	0
Siphoviridae_norank	0	0	0	0	0	0	0	0	0	0	0	0	0	0	0	0	0	0	0	0	0	0	0	0	0	0	0	0	0	0	0	0	0	0	0	0	0	0	0	0	0	0	0	0	0	0	0	0	0
Skermanella	0	0	0	0	0	0	0	0.0153134	0	0	0	0	0	0	0	0	0	0	0	0	0	0	0	0	0	0	0	0	0	0	0	0	0	0	0	0	0	0	0	0	0	0	0	0	0	0	0	0	0
Slackia	0.0559613	0	0	0	0	0	0	0	0	0	0	0	0	0	0	0	0	0	0	0	0	0	0	0	0	0	0	0	0	0	0	0	0	0	0	0.0396642	0	0	0	0	0	0	0	0	0	0	0.0554079	0	0
Smithella	0	0	0	0	0	0	0	0	0	0	0	0	0	0	0	0	0	0	0	0	0	0	0	0	0	0	0	0	0	0	0	0	0	0	0	0	0	0	0	0	0	0	0	0	0	0	0	0	0
Snowella	0	0	0	0	0	0	0	0	0	0	0	0	0	0	0	0	0	0	0	0	0	0	0	0	0	0	0	0	0	0	0	0	0	0	0	0	0	0	0	0	0	0	0	0	0	0	0	0	0
Sodalis	0	0	0	0	0	0	0	0	0	0	0	0	0	0	0	0	0	0	0	0	0	0	0	0	0	0	0	0	0	0	0	0	0	0	0	0	0	0	0	0	0	0	0	0	0	0	0	0	0
Soehngenia	0.118329	0	0	0	0	0	0	0	0	0	0	0	0	0	0	0	0	0	0	0	0	0	0	0	0	0	0	0	0	0	0	0	0	0	0	0	0	0	0	0	0	0	0	0	0	0	0	0	0
Solanaceae	0	0	0	0	0	0	0	0	0	0	0	0	0	0	0	0	0	0	0	0	0	0	0	0	0	0	0	0	0	0	0	0	0	0	0	0.0136273	0	0	0	0	0	0	0	0	0	0	0	0	0
Solimicrobium	0	0	0	0	0	0	0	0	0	0	0	0	0	0	0	0	0	0	0	0	0	0	0	0	0	0	0	0.0271824	0	0	0	0	0	0	0	0	0	0	0	0	0	0	0	0	0	0	0	0	0
Solirubrobacter	0	0	0	0	0	0	0	0	0	0.692597	0	0	0	0	0	0	0	0	0.0386139	0	0	0	0	0	0	0	0	0	0	0	0	0	0	0	0	0	0	0	0	0	0	0	0	0	0	0	0	0	0
Solitalea	0	0.0333964	0	0	0	0	0	0	0	0	0	0	0	0	0	0	0	0	0	0	0	0	0	0	0	0	0.0310439	0	0	0	0	0	0	0	0	0	0	0	0	0	0	0	0	0	0	0.0388572	0	0	0
Solobacterium	0	0	0	0	0	0	0	0.165473	0	0	0	0	0	0	0	0	0	0	0	0	0	0	0	0	0	0	0	0	0.0299428	0	0	0	0	0	0	0	0	0	0	0	0	0	0	0	0	0	0	0	0
Soonwooa	0	0	0	0	0	0	0	0	0	0	0	0	0	0	0	0	0	0	0.0802981	0	0	0	0	0	0	0	0	0	0	0	0	0	0	0	0	0	0	0	0	0	0	0	0	0	0	0	0	0	0
Sorangium	0	0.0132794	0	0	0	0	0	0.00796063	0	0	0.0299667	0	0	0	0	0	0	0	0.0276129	0	0	0	0	0	0	0	0.0168399	0	0.0932635	0	0	0	0	0	0	0	0	0	0	0	0	0	0	0	0	0	0	0	0
Spartobacteria_norank	0.0252849	0	0	0.455682	0	2.71319	0.0508351	0	0	0	0	0	0	0	0	0	0	0.0543591	0.0989602	0	0.255852	0	0	0	0	0	0	0	0.180459	0	0.676265	0	0	0	0	0.0164418	0	0	0	0	0	0	0	0	0	0	0	0	0
Sphaerobacter	0	0	0	0	0	0	0	0.0195382	0	0	0	0	0	0	0	0	0	0	0	0	0	0	0	0	0	0	0	0	0	0	0	0	0	0	0	0	0	0	0	0	0	0	0	0	0	0	0	0	0
Sphaerochaeta	0.783865	0.0899609	0	0.190355	0	0	0.0875537	0.465537	0	0	0.00858231	0	0.126072	0	0	0	0	0	0.332415	0	0.32538	0	0	0	0	0	0	0	0.477341	0	0	0	0	0	0.16095	0.327049	0	0.0470391	0	0	0	0	0	0	0	0	0.00880825	0	0
Sphaerospermopsis	0	0	0	0.0204101	0	0	0	0	0	0	0	0	0	0	0	0	0	0	0	0	0	0	0	0	0	0	0	0	0	0	0	0	0	0	0	0	0	0	0	0	0	0	0	0	0	0	0	0	0
Sphingobacteriaceae_norank	0	0	0	0.756007	0	0	0	0	0	0	0	0	0	0	0	0	0	0	0	0	0.0474959	0	0	0	0	0	0.0659489	0	0.336836	0.0255539	1.14121	0	0	0	0	2.06171	0	0.0206738	0	0	0	0	0	0	0	0	0	0	0
Sphingobacteriales_norank	0.0683604	0	0	0.0177554	0	0	0	0	0	0	0	0	0	0	0	0	0	0.0234174	0.0303633	0	0.195225	0	0	0	0	0	0.0276731	0.0936977	0.422009	0	0.0405553	0	0	0.0279619	0	0.0343879	0	0.21624	0	0	0	0	0	0	0	0	2.56849	0	0.0144557
Sphingobacteriia_norank	0	0	0	0.311068	0	0	0	0	0	0	0	0	0	0	0	0	0	0	0	0	0.0270057	0	0	0	0	0	0	0.0865511	0	0	0	0	0	0	0	0	0	0	0	0	0	0	0	0	0	0	0	0	0
Sphingobacterium	0.0742212	0	0	1.19261	0	0	0	0	0	0.103524	0	0	0	0	0	0	0	0	0.301073	0	0.582439	0	0	0	0	0.277484	0.396738	0.824523	0.422594	0	0.0360085	0	0	0.273659	0.564652	1.56713	0	0.47475	0	0	0	0	0	0.258545	0	0	0	0	0
Sphingobium	0	0	0	0	0	0	0.0330989	0	0	0	0	0	0	0	0	0	0	0	0	0.0359358	0	0	0	0	0	0	0	0	0	0	0	0	0	0	0	0	0	0	0	0	0	0	0	0	0	0	0	0	0
Sphingomonadaceae_norank	0	0	0	0	0	0	0	0	0	0	0	0	0	0	0	0	0	0	0	0	0	0	0	0	0	0.0102345	0	0	0	0	0	0	0	0	0	0	0	0	0	0	0	0	0	0	0	0	0	0	0
Sphingomonadales_norank	0	0	0	0	0	0	0	0	0	0	0	0	0	0	0	0	0	0	0	0	0.174549	0	0	0	0	0	0	0	0	0	0	0	0	0	0	0	0	0	0	0	0	0	0	0	0	0	0	0	0
Sphingomonas	0.000967187	0	0	0	0	0	0	0	0	0	0	0.0888347	0	0	0	0	0	0	0	0	0.0978003	0	0	0	0	0	0.0193597	0	0.28528	0	0	0	0	0	0	0	0	0	0	0	0	0	0	0	0	0	0	0	0
Sphingopyxis	0	0	0	0	0	0	0	0	0	0	0	0	0	0	0	0	0	0	0	0	0	0	0	0	0	0	0	0.0265873	0	0	0	0	0	0	0	0	0	0	0	0	0	0	0	0	0	0	0	0	0
Spirochaeta	0.288542	0	0	0.201458	0	0.0612121	0	0.20371	0	0	0	0	0	0	0	0	0	0	0.0133857	0	0.0537819	0	0	0	0	0	0	0.219726	0	0	0	0	0	0	0	0	0	0	0	0	0	0	0	0	0	0	0	0	0
Spirochaetaceae_norank	0.369009	0	0	0.1605	0	0	0	0	0	0	0	0.495781	0	0	0	0	0	0	0	0	2.74045	0	0	0	0.529837	0	0	0	0.874859	0	0.132454	0	0	0	0.184477	0	0	0	0	0	0	0	0	0	0	0	0	0	0
Spirochaetales_norank	0	0	0	0.0488572	0	0	0.0171326	0	0	0	0	0	0	0	0	0	0	0	0	0	0.0656141	0	0	0	0	0	0	0	0.295897	0	0	0	0	0	0.0291647	0	0	0	0	0	0	0	0	0	0	0	0	0	0
Spirochaetes_norank	0.135254	0	0	0	0	0	0	0	0	0	0	0	0	0	0	0	0	0	0.0939599	0	0.36657	0	0.0614702	0	0	0	0	0	0	0	0	0	0	0	0.0371184	0	0	0	0	0	0	0	0	0	0	0	0.0502546	0	0
Spirochaetia_norank	0	0	0	0.0561614	0	0	0	0	0	2.24368	0	0	0	0	0	0	0	0	0.175275	0	0.175513	0	0	0	0	0	0	0.0473764	0.375748	0	0	0	0	0	0.0593563	0	0	0.180724	0	0	0	0	0	0	0	0	0	0	0
Spirosoma	0	0	0	7.17803	0	0	0	0	0	0.145047	0	0	0	0	0	0	0	0.0196257	0	1.0083	0.835355	0	0	0	0	0.2128	0.0311718	0	0	0.0114891	0.339978	0	0	0	0.17597	0.636029	0.0211341	0.313996	0	0	0	0	0	0	0	0	0	0	0
Spongiivirga	0	0	0	0	0	0	0	0	0	0	0	0	0	0	0	0	0	0	0	0	0	0	0	0	0	0	0	0.0397986	0	0	0	0	0	0	0	0	0	0	0	0	0	0	0	0	0	0	0	0	0
Sporanaerobacter	0	0	0	0	0	0	0	0.0608094	0	0	0	0	0	0	0	0	0	0	0	0	0	0	0	0	0	0	0	0	0.042212	0	0	0	0	0	0	0	0	0	0	0	0	0	0	0	0	0	0	0	0
Sporobacter	0.0114211	0	0	0	0	0	0.332625	0	0	0	0	0	0	0	0	0	0	0	0	0	0	0	0	0	0	0	0	0	0	0	0	0	0	0	0	0	0	0.161489	0	0	0	0	0	0	0	0	0	0	0.478745
Sporocytophaga	0	2.97046	0	1.61403	0	5.04242	0	0	0	0	0	0	0	1.21951	0	0	0	0	0	0	0.404237	0	0	0	0	0	0	0	0	0	0	0	0	0	0	0	0	0	0	0	0	0	0	0	0	0	0.159832	0	0
Sporolactobacillus	0	0	0	0	0	0	0	0	0	0	0	0	0	0	0	0	0	0	0	0	0	0	0	0	0	0	0	0	0.0344906	0	0	0	0	0	0	0	0	0	0	0	0	0	0	0	0	0	0	0	0
Sporomusa	0	0	0	0	0	0	0	0	0	0	0	0	0	0	0	0	0	0	0	0	0	0	0	0	0	0	0	0	0	0	0	0	0	0	0	0	0	0	0	0	0	0	0	0	0	0	0	0	0
Sporomusaceae_norank	0	0	0	0	0	0	0	0	0	0	0	0	0	0	0	0	0	0	0	0	0	0	0	0	0	0	0	0	0	0	0	0	0	0	0	0	0	0	0	0	0	0	0	0	0	0	0	0	0
Sporosarcina	0	0	0	0	0	0	0	0	0	0.0347058	0	0	0	0	0	0	0	0	0	0.0359869	0.0274157	0	0	0	0	0	0	0	0.344288	0	0	0	0	0	0	0	0	0	0	0	0	0	0	0	0	0	0	0	0
Stanieria	0	0	0	0	0	0	0	0	0	0	0	0	0	0	0	0	0	0	0	0	0	0	0	0	0	0	0.0360201	0	0	0	0	0	0	0	0	0	0	0	0	0	0	0	0	0	0	0	0	0	0
Staphylococcus	0	0	0	0.180973	0	0	0	0	0	0	0	0	0	0	0	0	0	0	0	0	0.0628371	0	0	0	0	0	0	0	0	0	0	0	0	0	0	0	0	0	0	0	0	0	0	0	0	0.0295726	0	0	0
Stenotrophomonas	0	0	0	0.105592	0	0	0	0	0	0	0	0	0	0	0	0	0	0	0	0	0.0883171	0	0	0	0	0	0	0	0	0	0	0	0	0	0	0	0	0	0	0	0	0	0	0	0	0	0	0	0
Stentor	0	0	0	0	0	0	0	0	0	0	0	0	0	0	0	0	0	0	20.8751	0	0	0	0	0	0	0	0	0	0	0	0	0	0	0	0	0	0	0	0	0	0	0	0	0	0	0	0	0	0
Steroidobacter	0	0	0	0	0	0	0	0	0	0	0	0	0	0	0	0	0	0.200245	0	0	0	0	0	0	0	0.0185205	0	0	0	0.145113	0	0	0	0	0	0	0	0.0534944	0	0	0	0	0	0	0	0	0	0	0
Sterolibacterium	0	0	0	0	0	0	0	0	0	0	0	0	0	0	0	0	0	0	0	0	0	0	0	0	0	0	0	0	0	0	0	0	0	0	0	0	0	0	0	0	0	0	0	0	0	0	0	0	0
Stigmatella	0	0	0	0	0	0	0	0	0	0	0	0	0	0	0	0	0	0	0	0	0	0	0	0	0	0	0	0	0	0	0	0	0	0	0	0	0	0	0	0	0	0	0	0	0	0	0	0	0
Stomatobaculum	0	0	0	0	0	0	0	0	0	0	0	0	0	0	0	0	0	0	0	0	0	0	0	0	0	0	0	0	0	0	0	0	0	0	0	0	0	0	0	0	0	0	0	0	0	0	0	0	0
Streblomastix	0	0	0	0	0	0	0	0	0	0	0	0	0	0	0	0	0	0	0	0	0	0	0	0	0	0	0	0	0	0	0	0	0	0	0	0	0	0	0	0	0	0	0	0	0	0	0	0	0
Streptacidiphilus	0	0	0	0	0	0	0	0	0	0	0	0	0	0	0	0	0	0	0	0	0	0	0	0	0	0	0	0	0	0	0	0	0	0.0436273	0	0	0	0	0	0	0	0	0	0	0	0	0	0	0
Streptobacillus	0	0	0	0	0	0	0	0	0	0	0	0	0	0	0	0	0	0	0	0	0	0	0	0	0	0	0	0	0	0	0	0	0	0	0	0	0	0	0	0	0	0	0	0	0	0	0	0	0
Streptococcus	4.77638	0	0	0.1024	0	0	0.120686	0.630615	0	0	0	0	0	0	0	0	0	0	0	0.0579233	0.958473	0	0	0	0	0	0	5.43726	0.357601	0	0.0228814	0	0	0	0	0	0.0249048	0.0357839	0	0	0	0	0	0	0	0	0	0	0
Streptohalobacillus	0	0	0	0	0	0	0	0	0	0	0	0	0	0	0	0	0	0	0	0	0.0128991	0	0	0	0	0	0	0	0	0	0	0	0	0	0	0	0	0	0	0	0	0	0	0	0	0	0	0	0
Streptomyces	0.164361	0.162833	0	0.0695551	0	0	0	0.0493478	0	0	0	0.194233	0	0	0	0	0	0	0.0548097	0.253317	1.48681	0	0	0	0	0	0.498488	0.355484	0.107548	0.0411377	0	0	0	0.116729	0	0.221081	0	0.178231	0	0	0	0	0	0.0150261	0	0	0.0468541	0	0
Strongyloididae	0	0	0	0	0	0	0	0	0	0	0	0	0	0	0	0	0	0	0	0	0	0	0	0	0	0	0	0	0	0	0	0	0	0	0	0	0	0	0	0	0	0	0	0	0	0	0	0	0
Stylonychia	0	0	0	18.7178	0	0	0	0	0	0	0	0	0	0	0	0	0	0	1.1327	0	0	0	0	0	0	0	0	1.43605	0	0	0	0	0	0	0	0	0	0	0	0	0	0	0	0	0	0	0.211805	0	0
Subdoligranulum	14.3032	0	0	0	0	0	0.308399	2.52873	0	0	0	0.055206	0	0	0	0	0	0	1.21869	0.314882	5.39852	0	0.0786446	0	0	0	0.217354	0.256923	8.94076	0	2.06961	0	0	0	0.264349	1.04382	0	1.1549	0	0	0	0	0	0	0	0	0	0	0
Succinatimonas	0	0	0	0	0	0	0	0	0	0	0	0	0	0	0	0	0	0	0	0	0	0	0	0	0	0	0	0	0	0	0	0	0	0	0	0	0	0	0	0	0	0	0	0	0	0	0	0	0
Succiniclasticum	3.7987	0	0	0	0	0	0	0	0	0	0	0	0	0	0	0	0	0	0	0	0	0	0	0	0	0	0	0.10135	0	0	0	0	0	0	0	0	0	0	0	0	0	0	0	0	0	0	0	0	0
Succinimonas	0	0	0	0	0	0	0	0	0	0	0	0	0	0	0	0	0	0	0	0	0	0	0	0	0	0	0	0	0	0	0	0	0	0	0	0	0	0	0	0	0	0	0	0	0	0	0	0	0
Succinivibrio	0	0	0	0.115217	0	0	0	0.985773	0	0	0	0	0	2.05139	0	0	0	0	0	0	0.235725	0	0	0	0	0	0	0	0	0	0.325871	0	0	0	0	0.436707	0.780732	0	0	0	0	0	0	0	0	0	0	0	0
Succinivibrionaceae_norank	0	0	0	0	0	0	0	0	0	0	0	0	0	0	0	0	0	0	0	0	0	0	0	0	0	0	0	0	0	0	0	0	0	0	0	0	0	0	0	0	0	0	0	0	0	0	0	0	0
Suicoccus	0	0	0	0	0	0	0	0	0	0	0	0	0	0	0	0	0	0	0	0	0	0	0	0	0	0	0	0	0	0	0	0	0	0	0	0	0	0	0	0	0	0	0	0	0	0	0	0	0
Sulfobacillus	0	0	0	0	0	0	0	0	0	0	0	0	0	0	0	0	0	0	0	0	0	0	0	0	0	0	0	0	0	0	0	0	0	0	0	0	0	0	0	0	0	0	0	0	0	0	0	0	0
Sulfolobus	0.0300767	0	0	0	0	0	0	0	0	0	0	0	0	0	0	0	0	0	0	0	0	0	0	0	0	0	0	0	0	0	0	0	0	0	0	0	0	0	0	0	0	0	0	0	0	0	0	0	0
Sulfuricaulis	0	0	0	0	0	0	0	0	0	0	0	0	0	0	0	0	0	0	0	0	0	0	0	0	0	0	0.129114	0	0	0	0	0	0	0	0	0	0	0	0	0	0	0	0	0	0	0	0	0	0
Sulfurihydrogenibium	0	0	0	0	0	0	0	0	0	0	0	0	0	0	0	0	0	0	0	0	0	0	0	0	0	0	0	0	0	0	0	0	0	0	0	0	0	0	0	0	0	0	0	0	0	0	0	0	0
Sulfurisoma	0	0	0	0	0	0	0	0	0	0	0	0	0	0	0	0	0	0	0	0	0	0	0	0	0	0	0	0	0	0	0	0	0	0	0	0	0	0	0	0	0	0	0	0	0	0	0	0	0
Sulfurovum	0.0274092	0	0	0	0	0	0	0	0	0	0	0	0	0	0	0	0	0	0	0	0	0	0	0	0	0	0	0	0	0	0	0	0	0	0	0	0	0	0	0	0	0	0	0	0	0	0	0	0
Sunxiuqinia	0.111303	0	0	0.0157246	0	0	0.0605664	0	0	0	0	0	0	0	0	0	0	0.921079	0	0	0.333533	0	0.193232	0	0	0	0.510411	0.0397383	2.67006	0	0	0	0	0	0.0586551	0.346489	0.125689	0.096284	0	0	0	0	0	0	0	0	0	0	0
Sutterella	0	0	0	0	0	0	0	0	0	0	0	0	0	0.0188893	0	0	0	0	0	0	0	0	0	0	0	0	0	0	0	0	1.65164	0	0	0	0	0.0368389	0	0.0774015	0	0	0	0	0	0	0	0	0	0	0
Symbiobacterium	0	0	0	0	0	0	0	0	0	0	0	0	0	0	0	0	0	0	0	0	0	0	0	0	0	0	0	0	0	0	0	0	0	0	0	0	0	0	0	0	0	0	0	0	0	0	0	0	0
Symploca	0	0	0	0	0	0	0	0	0	0	0	0	0	0	0	0	0	0	0	0	0	0	0	0	0	0	0	0	0	0	0	0	0	0	0	0	0	0	0	0	0	0	0	0	0	0	0.032538	0	0
Synechococcus	0	0	0	0	0	0.033953	0	0	0	0	0	0	0	0	0	0	0	0	0	0	0	0	0	0	0	0	0	0	0	0	0	0	0	0	0	0	0	0	0	0	0	0	0	0	0	0	0	0	0
Synergistaceae_norank	0.0158939	0	0	0	0	0	0	0	0	0	0	0	0	0	0	0	0	0	0	0	0	0	0	0	0	0	0	0	0	0	0	0	0	0	0	0	0	0	0	0	0	0	0	0	0	0	0	0	0
Synstelium	0	0	0	0	0	0	0	0	0	0	0	0	0	0	0	0	0	0	0	0	0	0	0	0	0	0	0	0	0	0	0	0	0	0	0	0	0	0	0	0	0	0	0	0	0	0	0	0	0
Syntrophaceae_norank	0	0	0	0	0	0	0	0	0	0	0	0	0	0	0	0	0	0	0	0	0	0	0	0	0	0	0	0	0	0	0	0	0	0	0	0	0	0	0	0	0	0	0	0	0	0	0	0	0
Syntrophobotulus	0	0	0	0.0907083	0	0	0	0	0	0	0	0	0	0	0	0	0	0	0	0	0	0	0	0	0	0	0	0	0	0	0	0	0	0	0	0	0	0	0	0	0	0	0	0	0	0	0	0	0
Syntrophomonas	0	0	0	0	0	0	0	0	0	0	0	0	0	0	0	0	0	0	0	0	0	0	0	0	0	0	0	0	0	0	0	0	0	0	0	0	0	0	0	0	0	0	0	0	0	0	0	0	0
Talpidae	0	0	0	0	0	0	0	0	0	0	0	0	0	0	0	0	0	0	0.237858	0	0	0	0	0	0	0	0	0	0	0	0	0	0	0	0	0	0	0	0	0	0	0	0	0	0	0	0	0	0
Tamlana	0	0	0	0	0	0	0	0	0	0	0	0	0	0	0	0	0	0	0	0	0.0100707	0	0	0	0	0	0.0238616	0	0	0	0	0	0	0	0	0.400386	0.281251	0.0157173	0	0	0	0	0	0	0	0	0	0	0
Tangfeifania	0	0	0	0.0133952	0	0	0	0	0	0	0	0	0	0	0	0	0	0	0	0	2.21095	0	0	0	0	0	0.0597666	0	0	0	0	0	0	0	0	0.249993	0	0.483285	0	0	0	0	0	0	0	0	0	0	0
Tannerella	1.33081	0	0	0.0207783	0	0	0	0	0	0.0332003	0	0	0	0	0	0	0	0.203283	0	0	0.130053	0	0	0	0	0	0	1.35613	3.41524	0.0139647	0	0	0	0	0.424897	1.2552	0	1.80263	0	0	0	0	0	0	0	0	0	0	0
Tautonia	0	0	0	0.0364743	0	0	0	0	0	0	0	0	0	0	0	0	0	0	0	0	0	0	0	0	0	0	0	0	0	0	0	0	0	0.0298607	0	0	0	0	0	0	0	0	0	0	0	0	0	0	0
Tenacibaculum	0	0	0	0	0	0	0	0	0	0	0	0	0	0.0725462	0	0	0	0	0	0	0	0	0	0	0	0	0	0	0.0407205	0	0	0	0	0	0	0	0	0	0	0	0	0	0	0	0	0	0.476236	0	0
Tenericutes_norank	2.66202	0	0	0.150955	0	0	0.0397771	0	0	0	0	0	0	0	0.0384995	0	0	0	0.0249998	0	0.0490672	0	0	0	0	0	0	0.0439541	0.238642	0	0	0	0	0	1.36056	0.140451	0.138959	0	0.0384995	0	0	0	0	0	0	0	0	0.258069	0.203319
Tengunoibacter	0	0	0	0	0	0.0639137	0	0	0	0	0	0	0	0	0	0	0	0	0	0	0	0	0	0	0	0	0	0	0.201941	0	0	0	0	0	0	0	0	0.114208	0	0	0	0	0	0	0	0	0.0306487	0	0
Tepidanaerobacter	0	0	0	0.238695	0	0	0	0	0	0	0	0	0	0	0	0	0	0	0	0	0	0	0	0	0	0	0	0	0.119212	0	0	0	0	0	0	0	0	0	0	0	0	0	0	0	0	0	0	0	0
Tepidibacter	0.0233972	0	0	0.281218	0	0	0.0176138	0	0	0	0	0	0	0	0	0	0	0	0	0	0	0	0	0	0	0	0	0	0	0.0473264	0	0	0	0	0	0	0	0	0	0	0	0	0	0	0	0	0	0	0
Tepidimicrobium	0.267661	0	0	0	0	0	0.355946	0	0	0	0	0	0	0	0	0	0	0	0	0	0	0	0	0	0	0	0	0	0	0	0	0	0	0	0	0	0	0	0	0	0	0	0	0	0	0	0	0	0.352057
Terasakiella	0	0	0	0	0	0	0	0	0	0	0	0	0	0	0	0	0	0	0	0	0	0	0	0	0	0	0	0	0	0	0	0	0	0	0	0	0	0	0	0	0	0	0	0	0	0	0	0	0
Teratosphaeriaceae	0	0	0	0	0	0	0	0	0	0	0	0	0	0	0	0	0	0	0	0	0	0	0	0	0	0	0	0	0	0	0	0	0	0.0251084	0	0	0	0	0	0	0	0	0	0	0	0	0	0	0
Teredinibacter	0	0	0	0.0155596	0	0	0	0	0	0	0	0	0	0	0	0	0	0	0	0	0	0	0	0	0	0	0	0	0	0	0	0	0	0	0	0	0	0	0	0	0	0	0	0	0	0	0	0	0
Terribacillus	0	0.0174021	0	0	0	0	0	0.0248746	0	0	0	0.0275079	0	0	0	0	0	0	0	0	0	0	0	0	0	0	0	0	0	0	0	0	0	0	0	0	0	0.0288074	0	0	0	0	0	0	0	0	0	0	0
Terriglobus	0	0	0	0	0	0	0	0	0	0	0	0	0	0	0	0	0	0	0.606604	0	0	0	0	0	0	0.0292972	0	0	0	0	0	0	0	0	0	0	0	0.0272574	0	0	0	0	0	0	0	0	0	0	0
Terrilactibacillus	0	0	0	0	0	0	0	0	0	0	0	0	0	0	0	0	0	0	0	0	0	0	0	0	0	0	0	0	0	0	0	0	0	0	0	0	0	0	0	0	0	0	0	0	0	0	0	0	0
Terrimicrobium	0.322109	0	0	0.164416	0	0.0778273	0	0	0	0.146571	0	0	0	0	0	0	0	0	0	0	0.232503	0	0	0	0.059224	0	0.111529	0.00897338	0.337316	0	0.0407847	0	0	0	0	0.188491	0	0	0	0	0	0	0	0	0	0	0.0273569	0	0
Terrimonas	0	0	0	0	0	0	0	0	0	0	0	0	0	0	0	0	0	0	0	0	0	0	0	0	0	0	0.843932	0	0	0	0	0	0	0	0.0975779	0	0	0.00628594	0	0	0	0	0	0	0	0	0	0	0
Terrisporobacter	0	0	0	0	0	0	0	0.0415326	0	0	0	0	0	0	0	0	0	0	0	0	0	0	0	0	0	0	0	0.0101346	0.031177	0	0	0	0	0	0	0	0	0	0	0	0	0	0	0	0	0	0	0	0
Tessaracoccus	0.637214	0	0	0	0	0	0	0	0	0	0	0	0	0	0	0	0	0	0	0	0	0	0	0	0	0	0	0	0.0242441	0	0.115472	0	0	0	0	0	0.0565363	0	0	0	0	0	0	0	0	0	0	0	0
Tetragenococcus	0.0732441	0	0	0	0	0	0	0	0	0	0	0	0	0	0	0	0	0	0	0	0	0	0	0	0	0	0	0	0	0	0	0	0	0	0	0	0	0	0	0	0	0	0	0	0	0	0	0	0
Tetrahymena	0	0	0	0	0	0	0	0	0	0	0	0	0	0	0	0	0	0	2.34756	0	0	0	0	0	0	0	0	0.555694	0	0	0	0	0	0	0	0	0	0	0	0	0	0	0	0	0	0	0.240243	0	0
Tetrasphaera	0	0	0	0	0	0	0	0	0	0	0	0	0	0	0	0	0	0	0	0.00774962	0	0	0	0	0	0	0	0	0	0	0	0	0	0	0	0	0	0	0	0	0	0	0	0	0	0	0	0	0
Thalassobacillus	0	0	0	0	0	0	0	0	0	0	0	0	0	0	0	0	0	0	0	0	0	0	0	0	0	0	0	0.0424366	0.0568893	0	0	0	0	0	0	0	0	0	0	0	0	0	0	0	0	0	0.025104	0	0
Thalassobius	0	0	0	0	0	0	0	0	0	0	0	0	0	0	0	0	0	0	0	0	0.101287	0	0	0	0	0	0	0	0.0931921	0	0	0	0	0	0	0.0287255	0	0	0	0	0	0	0	0	0	0	0	0	0
Thalassomonas	0	0	0	0	0	0	0	0	0	0	0	0	0	0	0	0	0	0	0	0	0	0	0	0	0	0	0	0.113536	0	0	0	0	0	0	0	0	0	0	0	0	0	0	0	0	0	0	0	0	0
Thalassotalea	0	0.0306151	0	0	0	0	0	0	0	0	0	0	0	0	0	0	0	0	0	0	0	0	0	0	0	0	0.0629666	0.00796419	0	0	0	0	0	0	0.248018	0	0	0	0	0	0	0	0	0	0	0	0	0	0
Thauera	0	0	0	0	0	0	0	0	0	0	0	0	0	0	0	0	0	0	0	0	0	0	0	0	0	0	0	0	0	0	0	0	0	0	0	0	0	0	0	0	0	0	0	0	0	0	0	0	0
Thaumarchaeota_norank	0	0	0	0.19783	0	0	0	0	0	0	0	0	0	0	0	0	0	0	0	0	0	0	0	0	0	0	0	0	0	0	0	0	0	0	0	0	0	0	0	0	0	0	0	0	0	0	0	0	0
Theaceae	0	0	0	0	0	0	0	0	0	0	0	0	0	0	0	0	0	0	0	0	0	0	0	0	0	0	0	0	0	0	0	0	0	0	0	0	0	0	0	0	0	0	0	0	0	0	0	0	0
Thermaerobacter	0	0	0	0	0	0	0	0	0	0	0	0	0	0	0	0	0	0	0	0	0	0	0	0	0	0	0	0	0	0	0	0	0	0	0	0	0	0	0	0	0	0	0	0	0	0	0	0	0
Thermasporomyces	0	0	0	0.0153224	0	0	0	0	0	0	0	0	0	0	0	0	0	0	0	0	0	0	0	0	0	0	0	0	0.0209282	0.956807	0	0	0	0	0	0	0	0.0215774	0	0	0	0	0	0	0	0	0	0	0
Thermicanus	0	0	0	0	0	0	0	0	0	0	0	0	0	0	0	0	0	0	0	0	0	0	0	0	0	0	0	0.0462074	0	0	0	0	0	0	0	0	0	0	0	0	0	0	0	0	0	0	0	0	0
Thermincola	0	0	0	0	0	0	0.0101213	0	0	0	0	0	0	0	0	0	0	0	0	0	0	0	0	0	0	0	0	0	0	0	0	0	0	0	0	0	0	0	0	0	0	0	0	0	0	0	0	0	0.0821494
Thermoactinomyces	0	0	0	0	0	0	0	0	0	0	0	0	0	0	0	0	0	0	0	0	0	0	0	0	0	0	0	0	0	0	0	0	0	0	0	0	0	0	0	0	0	0	0	0	0	0	0	0	0
Thermoanaerobacter	0.560467	0	0	0	0	0	0	0.0379031	0	0	0	0	0	0	0	0	0	0	0	0	0	0	0	0	0	0.157748	0	0.0236184	0	0	0	0	0	0	0	0	0	0	0	0	0	0	0	0	0	0	0	0	0
Thermoanaerobacteraceae_norank	0	0	0	0	0	0	0	0	0	0	0	0	0	0	0	0	0	0	0	0	0	0	0	0	0	0	0	0	0.0541136	0	0	0	0	0	0	0	0	0	0	0	0	0	0	0	0	0	0	0	0
Thermoanaerobacterales_norank	0	0	0	0	0	0	0	0	0	0	0	0	0	0	0	0	0	0	0	0	0	0	0	0	0	0	0	0	0	0	0	0	0	0	0	0	0	0	0	0	0	0	0	0	0	0	0	0	0
Thermoanaerobacterium	0.0683823	0	0	0.0349258	0	0	0.0431824	0.0202687	0	0	0	0	0	0	0	0	0	0	0.0491483	0	0.801798	0	0	0	0	0	0	0.0822952	0.330034	0	1.19541	0.0405221	0	0	0	0	0	0	0	0	0	0	0	0	0	0	0	0	0
Thermoanaerosceptrum	0	0	0	0	0	0	0	0	0	0	0	0	0	0	0	0	0	0	0	0	0	0	0	0	0	0	0	0	0	0	0	0	0	0	0	0	0	0	0	0	0	0	0	0	0	0	0	0	0
Thermobacillus	0.0297672	0	0	0.0628102	0	0	0	0	0	0	0	0	0	0	0	0	0	0	0	0.0358876	1.52603	0	0.0534554	0	0	0.0163596	0	0.183564	1.00776	0	0.616644	0	0	0	0.0392116	0	0	0	0	0	0	0	0	0	0	0	0	0	0
Thermobaculum	0.0214819	0	0	0	0	0	0	0.0419901	0	0	0	0	0	0	0	0	0	0	0	0	0	0	0	0	0	0	0	0	0	1.21215	0	0	0	0	0	0	0	0.0214318	0	0	0	0	0	0	0	0	0	0	0
Thermobifida	0	0	0	0.0511146	0	0	0	0	0	0	0	0	0	0	0	0	0	0	0	0	0	0	0	0	0	0	0	0	0	0	0	0	0	0	0	0	0	0	0	0	0	0	0	0	0	0	0	0	0
Thermobrachium	0.0379097	0.543792	0	0	0	0	0	0.0582359	0	0	0	0	0	0	0	0	0	0	0	0	0	0	0	0	0	0	0	0	0	0	0	0	0	0	0	0	0	0	0	0	0	0	0	0	0	0	0	0	0
Thermoclostridium	1.28097	0	0	0.00677931	0	0	0	0	0	0.356594	0.210165	0	0	0	0	0	0	0	0	1.29191	0.152933	0	0.0161318	0	0	0	0	1.41933	5.33881	0	0	0	0	0	6.33112	0.0367534	0	0.0308397	0	0	0	0	0	0	0	0	0	0	0
Thermococci_norank	0.0578646	0	0	0	0	0	0	0	0	0	0	0	0	0	0	0	0	0	0	0	0	0	0	0	0	0	0	0	0	0	0	0	0	0	0	0	0	0	0	0	0	0	0	0	0	0	0	0	0
Thermococcus	0	0	0	0	0	0	0	0	0	0	0	0	0	0	0	0	0	0	0	0	0	0	0	0	0	0	0	0	0	0	0	0	0	0	0	0	0	0	0	0	0	0	0	0	0	0	0	0	0
Thermodesulforhabdus	0	0	0	0	0	0	0	0	0	0	0	0	0	0	0	0	0	0	0	0	0	0	0	0	0	0	0	0	0	0	0	0	0	0	0	0	0	0	0	0	0	0	0	0	0	0	0	0	0
Thermofilum	0	0	0	0	0	0	0	0	0	0	0	0	0	0	0	0	0	0	0	0	0	0	0	0	0	0	0	0	0	0	0	0	0	0.0443462	0	0	0	0	0	0	0	0	0	0	0	0	0	0	0
Thermoflavifilum	0	0	0	0	0	0	0	0	0	0	0	0	0	0	0	0	0	0	0	0	0	0	0	0	0	0	0	0	0	0	0.138886	0	0	0	0	0	0	0	0	0	0	0	0	0	0	0	0	0	0
Thermoflavimicrobium	0	0	0	0	0	0	0	0	0	0	0	0	0	0	0	0	0	0	0	0	0	0	0	0	0	0	0	0	0	0	0	0	0	0	0	0	0	0	0	0	0	0	0	0	0	0	0	0	0
Thermoflexia_norank	0	0	0	0	0	0	0	0	0	0	0	0	0	0	0	0	0	0	0	0	0	0	0	0	0	0	0	0	0	0	0	0	0	0	0	0	0	0	0	0	0	0	0	0	0	0	0	0	0
Thermoflexibacter	0	0	0	0	0	0	0	0	0	0	0	0	0	0	0	0	0	0	0	0	0	0	0	0	0	0	0	0	0	0	0	0	0	0	0	0.147538	0	0	0	0	0	0	0	0	0	0	0	0	0
Thermogemmatispora	0.0314314	0	0	0	0	0	0	0	0	0	0	0	0	0	0	0	0	0	0	0	0	0	0	0	0	0	0	0	0	0	0	0	0	0	0	0	0	0	0	0	0	0	0	0	0	0	0	0	0
Thermogutta	0	0	0	0.179991	0	0	0	0	0	0	0	0	0	0	0	0	0	0	0	0	0	0	0.91798	0	0	1.21613	1.24141	0.243979	0	0	0.0538885	0	0	0	0	1.21913	0	0.0519872	0	0	0	0	0	0	0	0	0	0	0
Thermohalobacter	0.0994701	0	0	0	0	0	0	0	0	0	0	0	0	0	0	0	0	0	0	0	0	0	0	0	0	0	0	0	0	0.0252316	0	0	0	0	0	0	0	0	0	0	0	0	0	0	0	0	0	0	0
Thermohydrogenium	0	0.0339191	0	0	0	0	0	0	0	0	0	0	0	0	0	0	0	0	0	0	0	0	0	0	0	0	0	0	0	0	0	0	0	0	0	0	0	0	0	0	0	0	0	0	0	0	0	0	0
Thermolongibacillus	0	0	0	0	0	0	0	0	0	0	0	0	0	0	0	0	0	0	0	0	0	0	0	0	0	0	0	0	0	0	0	0	0	0	0	0	0	0	0	0	0	0	0	0	0	0	0	0	0
Thermomonas	0	0	0	0	0	0	0	0.0225805	0	0	0	0	0	0	0	0	0	0	0	0	0	0	0	0	0	0	0	0	0	0	0	0	0	0	0	0	0	0	0	0	0	0	0	0	0	0	0	0	0
Thermophagus	0	0	0	0	0	0	0	0	0	0	0	0	0	0	0	0	0	0	0	0	0.156283	0	0.263002	0	0	0	0	0.0278341	0	0	0	0	0	0	0	0	0	0	0	0	0	0	0	0	0	0	0	0	0
Thermoplasmata_norank	0	0	0	0.0330553	0	0	0	0	0	0	0	0	0	0	0	0	0	0	0	0	0	0	0	0	0	0	0	0	0	0.233827	0	0	0	0	0	0	0	0.0209487	0	0	0	0	0	0	0	0	0	0	0
Thermoprotei_norank	4.95292	0	0	0.619316	0	0	0	0	0	0	0	0	0	0	0	0	0	0	0.20783	0	0	0	0	0	0	0	0.202496	0	0	0.0131466	0.179838	0	0	0	0	0.0155314	0	0	0	0	0	0	0	0	0	0	0	0	0
Thermosediminibacter	0	0	0	0	0	0	0	0	0	0	0	0	0	0	0	0	0	0	0	0	0	0	0	0	0	0	0	0	0	0	0	0	0	0	0	0	0	0	0	0	0	0	0	0	0	0	0	0	0
Thermosipho	0	0	0	0.0295898	0	0	0	0.0287809	0	0	0	0	0	0	0	0	0	0	0	0	0	0	0	0	0	0	0	0	0.0303187	0	0	0	0	0	0	0	0	0	0	0	0	0	0	0	0	0	0	0	0
Thermosporothrix	0	0	0	0	0	0	0	0	0	0	0	0	0	0	0	0	0	0	0	0	0	0	0	0	0	0	0	0	0.0394482	0	0	0	0	0	0	0	0	0.0458991	0	0	0	0	0	0	0	0	0	0	0
Thermotalea	0	0	0	0	0	0	0	0	0	0	0	0	0	0	0	0	0	0	0	0	0	0	0	0	0	0	0	0	0	0	0	0	0	0	0	0	0	0	0	0	0	0	0	0	0	0	0	0	0
Thermotoga	0	0	0	0.258292	0	0	0	0.0804773	0	0.0634243	0	0	0	0	0	0	0	0	0	0	0	0	0	0	0	0	0	0.0588567	0	0	0	0	0	0	0	0.0272556	0.0241778	0.0178151	0	0	0	0	0	0	0	0	0	0	0
Thermotogae_norank	0	0	0	0	0	0	0	0	0	0	0	0	0	0	0	0	0	0	0	0	0	0	0	0	0	0	0	0.163319	0	0	0	0	0	0	0	0	0	0.0121844	0	0	0	0	0	0	0	0	0	0	0
Thermovenabulum	0	0	0	0	0	0	0	0	0	0	0	0	0	0	0	0	0	0	0	0	0	0	0	0	0	0	0	0	0	0	0	0	0	0	0	0	0	0	0	0	0	0	0	0	0	0	0	0	0
Thioclava	0	0	0	0	0	0	0.0209435	0	0	0	0	0	0	0	0	0	0	0	0	0	0	0	0	0	0	0	0	0	0	0	0	0	0	0	0	0	0	0	0	0	0	0	0	0	0	0	0	0	0
Thiomargarita	0	0	0	0	0	0	0	0	0	0	0	0	0	0	0	0	0	0	0	0	0	0	0	0	0	0	0	0	0	0	0	0	0	0	0	0	0	0	0	0	0	0	0	0	0	0	0.0232808	0	0
Thiomicrospira	0	0	0	0	0	0	0	0	0	0	0	0	0	0	0	0	0	0	0	0	0	0	0	0	0	0	0.0334178	0	0	0	0	0	0	0	0	0	0	0	0	0	0	0	0	0	0	0	0	0	0
Thiomonas	0	0	0	0	0	0	0.0106246	0	0	0	0	0	0	0	0	0	0	0	0	0	0	0	0	0	0	0	0	0	0	0	0	0	0	0	0	0	0	0	0	0	0	0	0	0	0	0	0	0	0
Thiotrichaceae_norank	0	0	0	0	0	0	0	0	0	0	0	0	0	0	0	0	0	0	0	0	0	0	0	0	0	0	0	0	0	0	0	0	0	0	0	0	0	0	0	0	0	0	0	0	0	0	0	0	0
Thiotrichales_norank	0	0	0	0	0	0	0	0	0	0	0	0	0	0	0	0	0	0	0	0	0	0	0	0	0	0	0	0	0	0	0	0	0	0	0	0	0	0	0	0	0	0	0	0	0	0	0	0	0
Thraupidae	0	0	0	0	0	0	0	0	0	0	0	0	0	0	0	0	0	0	0.0622785	0	0	0	0	0	0	0	0	0	0	0	0	0	0	0	0	0	0	0	0	0	0	0	0	0	0	0	0	0	0
Thraustotheca	0	0	0	0	0	0	0	0	0	0	0	0	0	0	0	0	0	0	0	0	0	0	0	0	0	0	0	0	0	0	0	0	0	0	0	0	0	0	0	0	0	0	0	0	0	0	0	0	0
Tibeticola	0	0	0	0	0	0	0	0	0	0	0	0	0	0	0	0	0	0	0	0	0	0	0	0	0	0	0	0	0	0	0	0	0	0	0	0	0	0	0	0	0	0	0	0	0	0	0	0	0
Tieghemostelium	0	0	0	0	0	0	0	0	0	0	0	0	0	0	0	0	0	0	1.04465	0	0	0	0	0	0	0	0	0	0	0	0	0	0	0	0	0	0	0	0	0	0	0	0	0	0	0	0	0	0
Tindallia	0	0	0	0	0	0	0	0	0	0	0	0	0	0	0	0	0	0	0	0	0	0	0	0	0	0	0	0	0	0	0	0	0	0	0	0	0	0	0	0	0	0	0	0	0	0	0	0	0
Tissierella	0	0	0	0	0	0	0	0	0	0	0	0	0	0	0	0	0	0	0	0	0	0	0	0	0	0	0	0	0	0	0	0	0	0	0	0	0	0	0	0	0	0	0	0	0	0	0	0	0
Tissierellaceae_norank	0.0232478	0	0	0	0	0	0	0	0	0	0	0	0	0	0	0	0	0	0	0	0	0	0	0	0	0	0	0	0	0	0	0	0	0	0	0	0	0	0	0	0	0	0	0	0	0	0	0	0.160252
Tissierellia_norank	0	0	0	0	0	0	0	0	0	0	0	0	0	0	0	0	0	0	0	0	0	0	0	0	0	0	0	0	0	0	0	0	0	0	0	0	0	0	0	0	0	0	0	0	0	0	0	0	0
Tolumonas	0	0	0	0	0	0	0	0	0	0	0	0	0	0	0	0	0	0	0	0	0	0	0	0	0	0	0	0	0	0	0	0	0	0	0	0	0	0	0	0	0	0	0	0	0	0	0	0	0
Traorella	0	0	0	0	0	0	0	1.62676	0	0	0	0	0	0	0	0	0	0	0	0	0	0	0	0	0	0	0	0	0.307368	0	0	0	0	0	0	0	0	0	0	0	0	0	0	0	0	0	0	0	0
Treponema	41.9158	13.1901	0	80.7629	0	6.10676	18.6796	6.2647	0	36.9914	0.562255	7.24936	0.0873528	6.68669	0.0141028	10.3062	0	6.5429	15.8547	6.38606	57.0969	0	13.4124	0	0	3.87927	0	17.3475	39.8403	5.30459	0.223152	0	0	0	7.67859	3.7393	6.69356	0.970028	0.0141028	0.0762231	1.31019	0	0	0	1.04193	0	0.294664	0	0
Trichinellidae	0	0	0	0	0	0	0	0	0	0	0	0	0	0	0	0	0	0	0.100167	0	0	0	0	0	0	0	0	0	0	0	0	0	0	0	0	0	0	0	0	0	0	0	0	0	0	0	0	0	0
Trichococcus	0.162966	0	0	0	0	0	0	0.0351023	0.0338411	0	0	0	0	0	0	0	0	0	0	0.0286549	1.33804	0	0	0	0	0	0	0	0.278956	0	0	0	0	0	0.0949441	0	0	0.281047	0	0	0	0	0	0	0	0	0	0	0
Trichocomaceae	0	0	0	0	0	0	0	0	0	0	0	0	0	0	0	0	0	0	0	0	0	0	0	0	0	0	0	0	0	0	0	0	0	0	0	0	0	0	0	0	0	0	0	0	0	0	0	0	0
Trichogrammatidae	0	0	0	0	0	0	0	0	0	0	0	0	0	0	0	0	0	0	0	0	0	0	0	0	0	0	0	0	0	0	0	0	0	0	0	0	0	0	0	0	0	0	0	0	0	0	0	0	0
Trichomonas	0	0	0	0	0	0	0	0	0	0	0	0	0	0	0	0	0	0	0	0	0	0	0	0	0	0	0	0	7.65992	0	0	0	0	0	0	0	0	0	0	0	0	0	0	0	0	0	0	0	0
Trichoplacidae	0	0	0	0	0	0	0	0	0	0	0	0	0	0	0	0	0	0	0.185967	0	0	0	0	0	0	0	0	0	0	0	0	0	0	0	0	0	0	0	0	0	0	0	0	0	0	0	0	0	0
Trichuridae	0	0	0	0	0	0	0	0	0	0	0	0	0	0	0	0	0	0	0.0645468	0	0	0	0	0	0	0	0	0	0	0	0	0	0	0	0	0	0	0	0	0	0	0	0	0	0	0	0	0	0
Tritrichomonas	0	0	0	0	0	0	0	0	0	0	0	0	0	0	0	0	0	0	0	0.00988287	0	0	0	0	0	0	0.642906	0	0	0	0	0	0	0	0	0.665941	0	0	0	0	0	0	0	0	0	0	0	0	0
Trombiculidae	0	0	0	0	0	0	0	0	0	0	0	0	0	0	0	0	0	0	0	0	0	0	0	0	0	0	0	0	0	0	0	0	0	0	0	0	0	0	0	0	0	0	0	0	0	0	0	0	0
Trombidiidae	0	0	0	0	0	0	0	0	0	0	0	0	0	0	0	0	0	0	0.0727049	0	0	0	0	0	0	0	0	0	0	0	0	0	0	0	0	0	0	0	0	0	0	0	0	0	0	0	0	0	0
Trueperaceae_norank	0	0	0	0	0	0	0	0	0	0	0	0	0	0	0	0	0	0	0	0	0	0	0	0	0	0	0	0	0	0	0	0	0	0	0	0	0	0	0	0	0	0	0	0	0	0	0	0	0
Trueperella	0	0	0	0	0	0	0	0	0	0	0	0	0	0	0	0	0	0	0	0	0	0	0	0	0	0	0	0	0	0	0	0	0	0	0	0	0	0	0	0	0	0	0	0	0	0	0	0	0
Tsukamurella	0	0	0	0	0	0	0	0	0	0	0	0	0	0	0	0	0	0	0	0	0	0	0	0	0	0	0	0	0	0	0	0	0	0	0	0	0	0	0	0	0	0	0	0	0	0	0	0	0
Tuberibacillus	0	0	0	0	0	0	0	0	0	0	0	0	0	0	0	0	0	0	0	0	0	0	0	0	0	0	0	0	0	0	0	0	0	0	0	0	0	0	0	0	0	0	0	0	0	0	0	0	0
Turicibacter	0.291007	0	0	0.0472842	0	0	0	0.24343	0	0.121861	0	0	0	0	0.0572555	0.00515863	0	0	0.164398	0	0.0551323	0	0	0	0	0	0	0	0.184588	0	0.340923	0	0	0	0.086826	0.130208	0.118783	0	0.0572555	0.0398768	0	0	0	0	0	0	0	0	0
Tuwongella	0	0	0	0	0	0	0	0	0	0	0	0	0	0	0	0	0	0	0	0	0	0	0	0	0	0	0.0236414	0	0	0	0	0	0	0	0	0	0	0	0	0	0	0	0	0	0	0	0	0	0
Tyzzerella	0	0	0	0	0	0	0	0	0	0	0	0	0	0	0	0	0	0	0	0	0.0599633	0	0	0	0	0	0	0	2.38562	0	0.0602106	0	0	0	0	0	0	0	0	0	0	0	0	0	0	0	0	0	0
Ulvibacterium	0	0	0	0	0	0	0	0	0	0	0	0	0	0	0	0	0	0	0	0	0	0	0	0	0	0	0	0	0.0967134	0	0	0	0	0	0	0	0	0	0	0	0	0	0	0	0	0	0	0	0
Umboniibacter	0	0	0	0	0	0	0	0	0	0	0	0	0	0	0	0	0	0	0	0	0	0	0	0	0	0	0	0	0	0	0	0	0	0	0	0	0	0	0	0	0	0	0	0	0	0	0	0	0
Undibacterium	0	0	0	0	0	0	0	0	0	0	0	0	0	0	0	0	0	0	0	0	0	0	0	0	0	0	0	0	0.0233241	0	0	0	0	0	0	0	0	0	0	0	0	0	0	0	0	0	0	0	0
Vagococcus	0	0.206295	0	0	0	0	0	0.0277056	0	0	0	0	0	0	0	0	0	0	0	0	0.0251889	0	0	0	0	0	0	0	0	0	0	0	0	0	0	0	0	0	0	0	0	0	0	0	0	0	0	0	0
Vallitalea	0.08115	0.0284764	0	0	0	0	0.0455934	0	0	0	0	0	0	0	0	0	0	0	1.46881	0	0	0	0	0	2.3975	0.0326832	5.52317	0	0.660189	0	0.0876046	0	0	0	0.280195	0	0	0.656011	0	0	0	0	0	0	0	0	0	0	0
Variovorax	0	0	0	0	0	0	0	0	0	0	0	0	0	0	0	0	0	0	0	0	0	0	0	0	0	0	0	0	0	0	0	0	0	0	0	0	0	0	0	0	0	0	0	0	0	0	0	0	0.128196
Veillonella	0	0	0	0	0	0	0	0	0	0	0	0	0	0	0	0	0	0	0	0	0	0	0	0	0	0	0	0	0	0	0	0	0	0	0	0	0	0	0	0	0	0	0	0	0	0	0	0	0
Veillonellaceae_norank	0	0	0	0	0	0	0	0	0	0	0	0	0	0	0	0	0	0	0	0	0	0	0	0	0	0	0	0	0.0380177	0	0	0	0	0	0	0	0	0	0	0	0	0	0	0	0	0	0	0	0
Verrucobacter	0	0	0	0.0192169	0	0	0	0	0	0	0	0	0	0	0	0	0	0	0	0	0	0	0	0	0	0	0.234553	0	0	0	0	0	0	0	0	0.273932	0	0	0	0	0	0	0	0	0	0	0	0	0
Verrucomicrobia subdivision 3_norank	0.0297028	0	0	0.234601	0	0	0	0	0	0	0	0	0	0	0	0.0512591	0	0	0	0.294023	0.0154457	0	0.0542619	0	0	0.0205759	0	0	0	0	0	0	0	0	0	0.0211553	0	0.885294	0	0	0	0	0	0	0	0	0	0	0
Verrucomicrobia_norank	0.730307	0.143888	0	4.84805	0	0	0.721873	0.0159697	0	0.243951	0	0	0	0.222951	0	0	0	0.265311	3.52337	0.0263676	3.17246	0	0.104826	0	0.0543679	2.02788	0.796633	0.659535	6.30253	1.13013	1.63699	0	0	0.12489	0.0544276	3.46012	0	4.27055	0	0	0	0	0	0.116449	0	0	0.476266	0	0
Verrucomicrobiaceae_norank	0	0	0	0	0	0	0	0	0	0	0	0	0	0	0	0	0	0	0	0	0.0600414	0	0	0	0	0	0	0.286355	0	0	0	0	0	0	0	0.0988033	0	1.12753	0	0	0	0	0	0.0279103	0	0	0	0	0
Verrucomicrobiae_norank	0	0	0	0.0154682	0	0	0	0.0109664	0	0	0	0	0	0	0	0	0	0	0	0	0.361236	0	0	0	0	0	0.624777	0.181283	0.0517169	0	0.941701	0	0	0	0	0.0157268	0	0.317663	0	0	0	0	0	0	0	0	0	0	0
Verrucomicrobiales_norank	0	0	0	0.0419667	0	0	0	0	0	0	0	0	0	0	0	0	0	0	0	0	0.0291365	0	0	0	0	0	0	0.0247306	0	0.0527411	0	0	0	0	0	0	0	0	0	0	0	0	0	0	0	0	0	0	0
Verrucomicrobium	0	0	0	0.745693	0	0	0	0	0	0	0	0	0	0	0	0	0	0	0	0	0	0	0	0	0	0	0.0278107	0	0	0	0	0	0	0	0	0.0222314	0	0	0	0	0	0	0	0	0	0	0.0302276	0	0
Verrucosispora	0	0	0	0	0	0	0	0	0	0	0	0	0	0	0	0	0	0	0	0	0	0	0	0	0	0	0.0238898	0	0	0	0	0	0	0	0	0	0	0	0	0	0	0	0	0	0	0	0	0	0
Vespidae	0	0	0	0	0	0	0	0	0	0	0	0	0	0	0	0	0	0	0	0	0	0	0	0	0	0	0	0	0	0	0	0	0	0	0	0	0	0	0	0	0	0	0	0	0	0	0	0	0
Vibrio	0.00836544	0.0286965	0	0	0	0	0.0849899	0	0	0	0	0	0	0	0	0	0	0	0	0	0.0667709	0	0	0	0	0	0	0	0	0.0188768	0.00736588	0	0	0	0	0	0	0	0	0	0	0	0	0	0	0	0	0	0
Vibrionimonas	0.0975302	0	0	0	0	0	0	0	0	0	0	0	0	0	0	0	0	0.503707	0	0	0.622941	0	0	0	0	0.0429543	0	0	0	0.582712	0	0	0	0	0	0	0	0.56044	0	0	0	0	0	0	0	0.0694373	0	0	0.127229
Victivallaceae_norank	0	0	0	0.863146	0	0	0	0	0	0	0	0	0	0	0	0	0	1.72009	0	0.0800396	0.023255	0	0.0199063	0	0	2.22806	0	0	0.128851	0.866471	0.142552	0	0	0.0388568	0	1.392	0	0.302113	0	0	0	0	0	0	0	0	0.120759	0	0
Victivallales_norank	0	0	0	0.4353	0	0.219042	0	0.114842	0	0	0	0	0	0	0	0	0	0	0	0	0	0	0	0	0.0762175	0	0	0	0.0547879	0.125543	0	0	0	0	0	0	0	0.167737	0	0	0	0	0	0	0	0	0	0	0
Victivallis	0	0	0	1.25276	0	0.0462194	0	0	0	0.0623578	0	0	0	0	0	0	0	0	0	0	0.0819942	0	0	0	0.033744	0.0696315	0.109819	0	0.168542	4.64334	0.790248	0	0	0	0	0.143843	0	0.171994	0	0	0	0	0	0	0	0	0	0	0
Viperidae	0	0	0	0	0	0	0	0	0	0	0	0	0	0	0	0	0	0	0.0338864	0	0	0	0	0	0	0	0	0	0	0	0	0	0	0	0	0	0	0	0	0	0	0	0	0	0	0	0	0	0
Virgibacillus	0.206282	0	0	0.0268208	0	0	0	0	0	0	0	0	0	0	0	0	0	0	0.0307961	0.37359	0.0853527	0	0	0	0	0	0	0.441099	0.578984	0.344033	1.07621	0	0	0	0.0551054	0.177936	0	0	0	0	0	0	0	0	0	0	0	0	0
Viridibacillus	0	0	0	0	0	0	0	0	0	0	0	0	0	0	0	0	0	0	0	0.0758121	0	0	0	0	0	0	0	0	0	0	0	0	0	0	0	0	0	0	0	0	0	0	0	0	0	0	0	0	0
Viruses_norank	0	0	0	0	0	0	0	0	0	0	0	0	0	0	0	0	0	0	0	0	0	0	0	0	0	0	0	0	0	0	0	0	0	0	0	0	0	0	0	0	0	0	0	0	0	0	0	0	0
Volvocaceae	0	0	0	0	0	0	0	0	0	0	0	0	0	0	0	0	0	0	0	0	0	0	0	0	0	0	0	0	0	0	0	0	0	0	0	0	0	0	0	0	0	0	0	0	0	0	0	0	0
Vulcaniibacterium	0	0	0	0	0	0	0	0	0	0	0	0	0	0	0	0	0	0	0	0	0	0	0	0	0	0	0	0	0	0	0	0	0	0	0	0	0	0	0	0	0	0	0	0	0	0	0	0	0
Weissella	0	0	0	0	0	0	0	0	0	0	0	0	0	0	0	0	0	0	0	0	0	0	0	0	0	0	0	0	0	0	0	0	0	0	0	0	0	0	0	0	0	0	0	0	0	0	0	0	0
Wenyingzhuangia	0	0	0	0	0	0	0	0	0	0	0	0	0	0	0	0	0	0	0	0	0	0	0	0	0	0	0	0	0	0	0	0	0	0	0.0453817	0	0	0.0499928	0	0	0	0	0	0	0	0	0	0	0
Wenzhouxiangella	0	0	0	0	0	0	0.0228844	0	0	0	0	0	0	0	0	0	0	0	0	0	0	0	0	0	0	0	0	0	0	0	0	0	0	0	0	0	0	0	0	0	0	0	0	0	0	0	0	0	0
Winogradskyella	0	0	0	0	0	0	0	0	0	0	0	0	0	0	0	0	0	0	0	0	0	0	0	0	0	0	0	0	0	0	0	0	0	0	0	0	0	0	0	0	0	0	0	0	0	0	0.0343763	0	0
Woeseia	0	0	0	0	0	0	0	0	0	0	0	0	0	0	0	0	0	0	0	0	0	0	0	0	0	0	0	0	0	0	0	0	0	0	0	0	0	0	0	0	0	0	0	0	0	0	0	0	0
Wphvirus	0	0	0	0	0	0	0	0	0	0	0	0	0	0	0	0	0	0	0	0	0	0	0	0	0	0	0	0	0	0	0	0	0	0	0	0	0	0	0	0	0	0	0	0	0	0	0	0	0
Xanthomonadaceae_norank	0	0	0	0	0	0	0	0	0	0	0	0	0	0	0	0	0	0	0	0	0	0	0	0	0	0	0	0	0	0	0	0	0	0	0.0792038	0	0	0	0	0	0	0	0	0	0	0	0	0	0
Xanthomonadales_norank	0	0	0	0	0	0	0	0	0	0	0	0	0	0	0	0	0	0	0	0	0	0	0	0	0	0	0	0	0.821799	0	0	0	0	0	0	0	0	0	0	0	0	0	0	0	0	0	0	0	0
Xanthomonas	0	0	0	0	0	0	0	0	0	0	0	0	0	0	0	0	0	0	0	0	0.105836	0	0	0	0	0	0	0	0	0	0	0	0	0	0	0	0	0	0	0	0	0	0	0	0	0	0	0	0
Xenorhabdus	0	0	0	0	0	0	0	0	0	0	0	0	0	0	0	0	0	0	0	0	0	0	0	0	0	0	0	0	0	0	0	0	0	0	0	0	0	0	0	0	0	0	0	0	0	0	0	0	0
Xylanibacterium	0	0	0	0	0	0	0	0	0	0	0	0	0	0	0	0	0	0	0	0	0.0423017	0	0	0	0	0	0	0	0	0	0	0	0	0	0	0	0	0	0	0	0	0	0	0	0	0	0	0	0
Xylanimicrobium	0	0	0	0	0	0	0	0	0	0	0	0.746438	0	0	0	0	0	0	0	0	0	0	0	0	0	0	0	0	0	0	0	0	0	0	0	0	0	0	0	0	0	0	0	0	0	0	0	0	0
Xylanimonas	0	0	0	0	0	0	0	0	0	0	0	0.42623	0	0	0	0	0	0	0	0	0	0	0	0	0	0	0	0	0	0	0	0	0	0	0	0.00971794	0	0	0	0	0	0	0	0	0	0	0	0	0
Xylanivirga	0.0781439	0	0	0	0	0	0	0.0746063	0	0	0	0	0	0.344804	0	0	0	0	0.201132	0.779685	0	0	0	0	0	0	0	0.649629	0	0	0.0600344	0	0	0	0	0	0	0	0	0	0	0	0	0	0	0	0	0	0
Xylariales_norank	0	0	0	0	0	0	0	0	0	0	0	0	0	0	0	0	0	0	0	0	0.0394877	0	0	0	0	0	0	0	0	0	0	0	0	0	0	0	0	0	0	0	0	0	0	0	0	0	0	0	0
Youngiibacter	0.0300478	0	0	0	0	0	0	0.018989	0	0	0	0	0	0	0	0	0	0	0	0	0	0	0	0	0	0	0	0	0	0	0	0	0	0	0	0	0	0	0	0	0	0	0	0	0	0	0	0	0
Zavarzinella	0	0	0	0	0	0	0	0	0	0	0	0	0	0	0	0	0	0	0	0	0	0	0	0	0	0	0	0	0	0	0	0	0	0	0	0	0	0	0	0	0	0	0	0	0	0	0	0	0
Zhouia	0	0	0	0	0	0	0	0	0	0	0	0	0	0	0	0	0	0	0	0	0	0	0	0	0	0	0	0	0	0	0	0	0	0	0	0	0	0	0	0	0	0	0	0	0	0	0	0	0
Zobellia	0	0	0	0	0	0	0	0	0	0	0	0	0	0	0	0	0	0	0	0	0.0355439	0	0	0	0	0	0	0.0746239	0	0	0	0	0	0	0	0	0	0	0	0	0	0	0	0	0	0	0	0	0
Zosteraceae	0	0	0	0	0	0	0	0	0	0	0	0	0	0	0	0	0	0	0	0	0	0	0	0	0	0	0	0	0	0	0	0	0	0	0	0	0	0	0	0	0	0	0	0	0	0	0	0	0
Zosteropidae	0	0	0	0	0	0	0	0	0	0	0	0	0	0	0	0	0	0	0.210966	0	0	0	0	0	0	0	0	0	0	0	0	0	0	0	0	0	0	0	0	0	0	0	0	0	0	0	0	0	0
Zunongwangia	0	0	0	0	0	0	0	0	0	0	0	0	0	0	0	0	0	0	0	0	0.381381	0	0	0	0	0	0	0.0409897	0	0	0	0	0	0	0	0.0442811	0	0	0	0	0	0	0	0	0	0	0	0	0
[truncated: 72 more columns]
