# Supplementary material for: Reductive acetogenesis is a dominant process in the ruminant hindgut
Source: Research Square preprint supplement (doi:10.21203/rs.3.rs-4473149/v1), 2024-06-10
Supplement: Supplementary file 10 [file eb99f133e9389fd6353d6007.xlsx]

## Sheet: Differently expressed genes
Gene	BaseMean	Log2FoldChange1	LfcSE	stat	Pvalue	FDR Adj Pvalue
ENSCHIG00000012705	7963.17	-16.0042	0.70032	-22.8527	1.37318e-115	8.1984e-113
ENSCHIG00000024121	7003.36	5.73585	0.365934	15.6745	2.25873e-55	1.93636e-53
ENSCHIG00000010632	5243.65	15.0363	0.578987	25.9699	1.08252e-148	1.39203e-145
ENSCHIG00000016311	5145.95	3.64577	0.235147	15.5042	3.24933e-54	2.64971e-52
ENSCHIG00000009275	5120.7	-3.43769	0.5503	-6.24695	4.18545e-10	2.58376e-09
ENSCHIG00000012620	4562.5	-11.353	0.716625	-15.8424	1.58767e-56	1.40429e-54
ENSCHIG00000012525	4032.89	10.2807	0.206853	49.7007	0	0
ENSCHIG00000016188	3523.23	-11.4842	0.43199	-26.5845	1.02541e-155	1.55834e-152
ENSCHIG00000013613	3276.93	3.27407	0.192025	17.0503	3.47827e-65	4.43864e-63
ENSCHIG00000001082	2969.57	14.8818	0.599553	24.8215	5.25009e-136	4.87588e-133
ENSCHIG00000023701	2800.06	14.5751	0.575331	25.3334	1.37026e-141	1.43166e-138
ENSCHIG00000010165	2455.23	-3.94694	0.680493	-5.80011	6.62718e-09	3.52936e-08
ENSCHIG00000014749	2241.32	14.4759	0.608403	23.7933	3.9195e-125	3.12011e-122
ENSCHIG00000027096	2040.36	7.1161	0.391611	18.1713	8.70425e-74	1.61677e-71
ENSCHIG00000012846	1959.83	13.1724	0.658497	20.0038	5.10486e-89	1.64112e-86
ENSCHIG00000015228	1946.27	8.53331	0.321971	26.5034	8.86751e-155	1.23532e-151
ENSCHIG00000020923	1827.76	5.31592	0.154562	34.3934	3.1681e-259	1.76537e-255
ENSCHIG00000025654	1643.12	4.98258	0.37135	13.4175	4.77853e-41	2.10218e-39
ENSCHIG00000018745	1638.39	-9.41346	0.397346	-23.6908	4.48257e-124	3.40615e-121
ENSCHIG00000026454	1628.02	-4.7802	0.59763	-7.9986	1.25845e-15	1.24335e-14
ENSCHIG00000023436	1611.09	13.9996	0.576653	24.2774	3.3984e-130	2.84055e-127
ENSCHIG00000022668	1521.6	-9.96205	0.426531	-23.356	1.19891e-120	8.01688e-118
ENSCHIG00000027237	1459.81	8.58871	0.294329	29.1806	3.42004e-187	6.35254e-184
ENSCHIG00000000149	1410.96	6.26551	0.359006	17.4524	3.30228e-68	4.97336e-66
ENSCHIG00000011076	1351.91	-11.8041	0.684644	-17.2412	1.30369e-66	1.86271e-64
ENSCHIG00000026621	1139.87	13.2785	0.650958	20.3984	1.72862e-92	6.56758e-90
ENSCHIG00000016845	1135.58	13.273	0.727803	18.2371	2.61867e-74	5.03176e-72
ENSCHIG00000000097	1070.43	7.6121	0.225146	33.8097	1.42272e-250	4.75672e-247
ENSCHIG00000017958	1033.95	2.70177	0.212607	12.7078	5.35256e-37	1.94519e-35
ENSCHIG00000006608	1027.62	-13.2304	0.742386	-17.8215	4.81369e-71	8.29593e-69
ENSCHIG00000027130	951.53	8.0712	0.213969	37.7214	0	0
ENSCHIG00000018811	951.003	7.57091	0.235299	32.1757	3.86221e-227	1.07608e-223
ENSCHIG00000004710	936.666	13.2172	0.577941	22.8695	9.34317e-116	5.78481e-113
ENSCHIG00000015120	935.187	13.2149	0.581323	22.7325	2.14025e-114	1.23374e-111
ENSCHIG00000021113	929.957	2.2877	0.191335	11.9565	6.00371e-33	1.74546e-31
ENSCHIG00000021319	910.096	3.07716	0.409511	7.51423	5.72468e-14	4.91019e-13
ENSCHIG00000025848	845.695	3.92367	0.327044	11.9974	3.66796e-33	1.08912e-31
ENSCHIG00000023506	842.983	3.14018	0.268885	11.6785	1.64153e-31	4.49859e-30
ENSCHIG00000003901	838.062	5.77819	0.276552	20.8937	6.10764e-97	2.61798e-94
ENSCHIG00000026738	774.108	-13.1825	0.770327	-17.1128	1.19048e-65	1.56702e-63
ENSCHIG00000018372	773.526	3.43535	0.129075	26.6151	4.54124e-156	7.59159e-153
ENSCHIG00000025647	760.618	2.82159	0.444806	6.34341	2.24728e-10	1.42626e-09
ENSCHIG00000021842	731.933	9.53987	0.319122	29.8942	2.34412e-196	4.89834e-193
ENSCHIG00000015928	731.439	2.5761	0.32764	7.86261	3.76224e-15	3.57145e-14
ENSCHIG00000005326	720.073	3.68487	0.403902	9.12317	7.29568e-20	9.64126e-19
ENSCHIG00000015047	705.98	3.77432	0.219341	17.2075	2.33281e-66	3.24979e-64
ENSCHIG00000013677	665.064	12.501	0.615123	20.3228	8.07917e-92	2.93608e-89
ENSCHIG00000026333	644.689	2.30135	0.134164	17.1532	5.94525e-66	8.01506e-64
ENSCHIG00000008592	630.194	-12.8857	0.754728	-17.0733	2.34361e-65	3.03707e-63
ENSCHIG00000025429	628.643	12.642	0.584674	21.6223	1.10893e-103	5.29659e-101
ENSCHIG00000016601	615.56	3.6458	0.304261	11.9825	4.38924e-33	1.29181e-31
ENSCHIG00000013444	610.952	3.25579	0.22759	14.3055	2.02186e-46	1.15356e-44
ENSCHIG00000013575	607.6	3.23015	0.182496	17.6999	4.20252e-70	6.88761e-68
ENSCHIG00000017366	605.389	-3.98353	0.389106	-10.2376	1.34492e-24	2.4385e-23
ENSCHIG00000022590	587.742	5.05071	0.420034	12.0245	2.64076e-33	7.88315e-32
ENSCHIG00000023952	580.062	-3.00218	0.353435	-8.49431	1.99112e-17	2.21608e-16
ENSCHIG00000026707	553.938	2.67944	0.174012	15.398	1.68691e-53	1.3302e-51
ENSCHIG00000020485	542.494	12.4292	0.600197	20.7085	2.90402e-95	1.18406e-92
ENSCHIG00000018854	541.414	12.4264	0.780509	15.9209	4.53635e-57	4.14394e-55
ENSCHIG00000013514	537.129	12.415	0.593579	20.9155	3.87329e-97	1.70394e-94
ENSCHIG00000023602	525.866	7.88751	0.233108	33.8362	5.78387e-251	2.41722e-247
ENSCHIG00000024466	512.705	2.5337	0.217606	11.6435	2.47589e-31	6.70818e-30
ENSCHIG00000026804	508.707	2.23354	0.299932	7.44682	9.56155e-14	8.07683e-13
ENSCHIG00000014603	500.175	-5.90646	0.321427	-18.3757	2.0553e-75	4.2948e-73
ENSCHIG00000013637	498.003	3.38766	0.199453	16.9848	1.06476e-64	1.29924e-62
ENSCHIG00000026015	487.882	8.4436	0.330349	25.5596	4.28995e-144	5.12251e-141
ENSCHIG00000020529	481.817	6.60113	0.508182	12.9897	1.39979e-38	5.46735e-37
ENSCHIG00000011719	480.419	-12.4943	0.738337	-16.9222	3.08817e-64	3.71402e-62
ENSCHIG00000026536	473.346	2.47923	0.153032	16.2007	4.98431e-59	4.93034e-57
ENSCHIG00000019803	456.696	11.7368	0.622553	18.8527	2.79309e-79	6.86648e-77
ENSCHIG00000015701	449.204	-3.66991	0.4229	-8.67795	4.0295e-18	4.73707e-17
ENSCHIG00000010963	448.032	3.79168	0.184636	20.5359	1.02879e-93	4.09482e-91
ENSCHIG00000020827	444.337	3.87466	0.210386	18.4169	9.61075e-76	2.03371e-73
ENSCHIG00000013715	429.832	4.15005	0.320759	12.9382	2.73889e-38	1.05014e-36
ENSCHIG00000001148	428.344	4.26558	0.23096	18.4689	3.67676e-76	7.88005e-74
ENSCHIG00000020679	426.482	10.537	0.5641	18.6793	7.29249e-78	1.66998e-75
ENSCHIG00000011509	390.189	-5.91596	0.517573	-11.4302	2.95471e-30	7.56415e-29
ENSCHIG00000003090	380.129	-11.615	0.663298	-17.5109	1.1824e-68	1.8302e-66
ENSCHIG00000012385	375.55	3.44816	0.316673	10.8887	1.3046e-27	2.80057e-26
ENSCHIG00000000476	373.489	2.82869	0.139863	20.2247	5.93315e-91	2.02417e-88
ENSCHIG00000001607	364.407	11.8553	0.578614	20.4891	2.69516e-93	1.04779e-90
ENSCHIG00000022058	362.67	4.20591	0.23062	18.2374	2.60723e-74	5.03176e-72
ENSCHIG00000014983	362.413	-4.6043	0.520053	-8.85351	8.48053e-19	1.04319e-17
ENSCHIG00000010082	354.317	-12.055	0.759367	-15.875	9.43688e-57	8.43617e-55
ENSCHIG00000012829	354.052	-2.57749	0.355263	-7.25516	4.01183e-13	3.22742e-12
ENSCHIG00000021877	352.551	-12.0478	0.742545	-16.225	3.3551e-59	3.33852e-57
ENSCHIG00000018316	352.534	-6.08281	0.599183	-10.1518	3.25199e-24	5.75885e-23
ENSCHIG00000018982	342.771	-12.0072	0.655191	-18.3263	5.10329e-75	1.02785e-72
ENSCHIG00000019452	340.556	-11.9978	0.710701	-16.8817	6.13545e-64	7.17247e-62
ENSCHIG00000012186	338.396	11.7485	0.667123	17.6107	2.03804e-69	3.27595e-67
ENSCHIG00000016400	337.116	9.53957	0.496327	19.2203	2.50186e-82	6.4344e-80
ENSCHIG00000023735	336.613	10.6301	0.580541	18.3107	6.79706e-75	1.3527e-72
ENSCHIG00000016191	335.761	2.31323	0.206486	11.2029	3.94796e-29	9.40142e-28
ENSCHIG00000011781	334.513	3.01289	0.308076	9.77972	1.37585e-22	2.19676e-21
ENSCHIG00000019798	332.146	-10.6982	0.653595	-16.3683	3.22347e-60	3.30593e-58
ENSCHIG00000011701	329.61	11.7101	0.592971	19.7482	8.30955e-87	2.35442e-84
ENSCHIG00000013901	325.421	3.28595	0.319552	10.283	8.40558e-25	1.55438e-23
ENSCHIG00000010881	321.114	4.73442	0.156756	30.2025	2.19608e-200	5.24455e-197
ENSCHIG00000014922	318.329	-2.5174	0.244296	-10.3047	6.70995e-25	1.2519e-23
ENSCHIG00000022999	315.819	-2.18166	0.290502	-7.50995	5.91511e-14	5.06832e-13
ENSCHIG00000012801	314.451	5.47047	0.360493	15.175	5.18041e-52	3.84893e-50
ENSCHIG00000002045	312.803	11.635	0.628179	18.5218	1.37796e-76	3.07139e-74
ENSCHIG00000023823	310.827	11.1814	0.598259	18.6898	5.99129e-78	1.41065e-75
ENSCHIG00000025153	309.686	4.51546	0.432378	10.4433	1.57222e-25	3.03146e-24
ENSCHIG00000016866	309.657	2.09306	0.147493	14.1909	1.0432e-45	5.69909e-44
ENSCHIG00000014286	297.841	7.07612	0.278089	25.4456	7.90299e-143	8.80762e-140
ENSCHIG00000018453	297.011	-3.8985	0.269204	-14.4816	1.58441e-47	9.56196e-46
ENSCHIG00000020775	296.471	9.80788	0.725607	13.5168	1.24476e-41	5.62395e-40
ENSCHIG00000015421	296.007	-4.53788	0.292613	-15.5081	3.05627e-54	2.50449e-52
ENSCHIG00000023918	284.594	2.95962	0.182135	16.2496	2.24952e-59	2.26537e-57
ENSCHIG00000018405	283.733	-2.75355	0.229904	-11.9769	4.69445e-33	1.37679e-31
ENSCHIG00000021181	282.213	-11.7267	0.712382	-16.4613	6.95611e-61	7.26783e-59
ENSCHIG00000023628	281.721	-11.1827	0.657862	-16.9985	8.42833e-65	1.04368e-62
ENSCHIG00000013439	279.603	4.69632	0.304293	15.4335	9.73803e-54	7.7152e-52
ENSCHIG00000011337	275.325	4.41621	0.308536	14.3134	1.80436e-46	1.033e-44
ENSCHIG00000020284	274.741	11.4476	0.624333	18.3357	4.296e-75	8.75807e-73
ENSCHIG00000023831	274.362	2.94234	0.294226	10.0003	1.51961e-23	2.5738e-22
ENSCHIG00000021945	271.603	-2.09294	0.608851	-3.43752	0.000587074	0.00158582
ENSCHIG00000015607	266.46	9.18823	0.530372	17.3241	3.09389e-67	4.45867e-65
ENSCHIG00000016300	264.385	-11.452	0.712205	-16.0797	3.54126e-58	3.40226e-56
ENSCHIG00000013572	260.957	3.81167	0.161602	23.5867	5.27385e-123	3.67346e-120
ENSCHIG00000025853	257.731	2.16733	0.194208	11.1598	6.4136e-29	1.50584e-27
ENSCHIG00000008416	256.774	-3.68652	0.909743	-4.05226	5.07252e-05	0.00016367
ENSCHIG00000016878	254.355	11.3362	0.593479	19.1013	2.46167e-81	6.2351e-79
ENSCHIG00000019405	253.344	-2.27419	0.255094	-8.91511	4.8732e-19	6.11601e-18
ENSCHIG00000014494	249.678	7.05887	0.750843	9.40126	5.39133e-21	7.71635e-20
ENSCHIG00000025539	248.72	5.31848	0.30472	17.4537	3.22867e-68	4.9067e-66
ENSCHIG00000018133	246.602	9.74305	0.566623	17.1949	2.89754e-66	3.97034e-64
ENSCHIG00000013961	246.326	-2.05877	0.614393	-3.3509	0.000805506	0.00211724
ENSCHIG00000011503	243.472	-4.55802	0.298353	-15.2773	1.08368e-52	8.23449e-51
ENSCHIG00000020720	241.714	-11.5032	0.72818	-15.7972	3.25009e-56	2.85957e-54
ENSCHIG00000024609	238.136	-2.19959	0.188905	-11.6439	2.46465e-31	6.68857e-30
ENSCHIG00000014595	236.686	11.2325	0.647843	17.3384	2.41564e-67	3.5115e-65
ENSCHIG00000006984	236.659	-2.20693	0.110533	-19.9663	1.08146e-88	3.41107e-86
ENSCHIG00000016090	236.587	-2.33488	0.174624	-13.3708	8.95278e-41	3.8773e-39
ENSCHIG00000012887	235.009	4.82211	0.353301	13.6487	2.05424e-42	9.67345e-41
ENSCHIG00000004827	233.994	2.74918	0.229694	11.9689	5.17296e-33	1.51183e-31
ENSCHIG00000022205	231.259	-8.536	0.484789	-17.6077	2.1519e-69	3.42604e-67
ENSCHIG00000022535	231.054	-3.2709	0.23803	-13.7415	5.72495e-43	2.77403e-41
ENSCHIG00000005780	228.993	2.65974	0.224902	11.8262	2.85719e-32	8.05459e-31
ENSCHIG00000026370	228.01	4.64176	0.306661	15.1364	9.31243e-52	6.82789e-50
ENSCHIG00000022583	227.293	-3.1678	0.162351	-19.5121	8.66995e-85	2.37599e-82
ENSCHIG00000009184	227.276	-3.22023	0.437732	-7.35662	1.88628e-13	1.55335e-12
ENSCHIG00000011324	226.959	2.23667	0.12603	17.7471	1.81491e-70	3.06464e-68
ENSCHIG00000013291	226.556	-9.63848	0.686263	-14.0449	8.28129e-45	4.3262e-43
ENSCHIG00000004709	225.709	5.6426	0.317429	17.7759	1.08568e-70	1.85197e-68
ENSCHIG00000007253	225.051	2.22619	0.25814	8.62398	6.46649e-18	7.46549e-17
ENSCHIG00000001465	220.211	11.1286	0.701775	15.8578	1.24133e-56	1.10379e-54
ENSCHIG00000015134	216.795	-11.3463	0.719478	-15.7702	4.99289e-56	4.3472e-54
ENSCHIG00000024891	216.779	11.1058	0.594517	18.6804	7.14798e-78	1.65962e-75
ENSCHIG00000023954	215.091	-2.8405	0.245176	-11.5856	4.87677e-31	1.29817e-29
ENSCHIG00000017977	211.503	2.02196	0.345861	5.84615	5.03081e-09	2.71727e-08
ENSCHIG00000011805	211.503	-3.06041	0.62873	-4.8676	1.12962e-06	4.60019e-06
ENSCHIG00000020562	208.539	2.17337	0.307773	7.06161	1.64585e-12	1.26267e-11
ENSCHIG00000015183	208.282	-11.2884	0.72357	-15.601	7.16266e-55	6.04738e-53
ENSCHIG00000018524	205.515	3.38374	0.251277	13.4662	2.47298e-41	1.09657e-39
ENSCHIG00000011568	205.353	2.09539	0.243073	8.6204	6.67218e-18	7.68703e-17
ENSCHIG00000014858	203.59	2.41448	0.242444	9.95891	2.30574e-23	3.8661e-22
ENSCHIG00000024223	202.856	3.18642	0.164355	19.3875	9.8472e-84	2.61295e-81
ENSCHIG00000009832	201.989	-7.98006	0.445125	-17.9277	7.16834e-72	1.2614e-69
ENSCHIG00000011513	201.66	-3.30039	0.559495	-5.89887	3.65998e-09	2.00999e-08
ENSCHIG00000015989	200.357	10.992	0.644914	17.0441	3.86694e-65	4.89725e-63
ENSCHIG00000016774	199.578	10.9863	0.60249	18.2348	2.73057e-74	5.18715e-72
ENSCHIG00000021513	198.696	-3.27344	0.362574	-9.02834	1.74294e-19	2.25691e-18
ENSCHIG00000008262	195.027	10.5089	0.979984	10.7236	7.89032e-27	1.63044e-25
ENSCHIG00000010930	194.341	-3.15329	0.328514	-9.59864	8.10062e-22	1.21888e-20
ENSCHIG00000022836	192.067	4.72291	0.372152	12.6908	6.64993e-37	2.40101e-35
ENSCHIG00000011890	189.472	-7.38264	0.506257	-14.5828	3.61409e-48	2.2294e-46
ENSCHIG00000010978	188.212	5.98924	0.23734	25.2348	1.66321e-140	1.63553e-137
ENSCHIG00000022421	187.639	-2.88466	0.19462	-14.822	1.05519e-49	7.11271e-48
ENSCHIG00000006085	185.604	9.33688	0.621061	15.0337	4.41301e-51	3.09968e-49
ENSCHIG00000026297	184.426	2.19153	0.172504	12.7042	5.60597e-37	2.0286e-35
ENSCHIG00000016726	183.73	-10.9269	0.647656	-16.8714	7.30295e-64	8.41954e-62
ENSCHIG00000010543	182.108	-2.51443	0.225777	-11.1368	8.30712e-29	1.92608e-27
ENSCHIG00000026143	181.683	5.94873	0.328138	18.1287	1.89063e-73	3.43539e-71
ENSCHIG00000019289	181.412	2.46472	0.163264	15.0965	1.70711e-51	1.23007e-49
ENSCHIG00000011770	180.757	2.76918	0.120814	22.921	2.87101e-116	1.84595e-113
ENSCHIG00000014676	178.826	-10.8878	0.643682	-16.9149	3.49421e-64	4.14275e-62
ENSCHIG00000018108	178.13	-9.03037	0.564033	-16.0103	1.08211e-57	1.01627e-55
ENSCHIG00000025376	177.761	-4.66682	0.414526	-11.2582	2.11019e-29	5.14227e-28
ENSCHIG00000000241	176.696	2.2213	0.21773	10.2021	1.94048e-24	3.49558e-23
ENSCHIG00000010823	175.946	-10.6839	0.630563	-16.9435	2.14995e-64	2.6044e-62
ENSCHIG00000023463	175.685	10.8024	0.621025	17.3945	9.08171e-68	1.35553e-65
ENSCHIG00000026977	174.904	2.62317	0.22579	11.6177	3.34872e-31	8.97125e-30
ENSCHIG00000016187	174.512	-9.59609	0.68509	-14.0071	1.41134e-44	7.25951e-43
ENSCHIG00000023050	173.898	2.55743	0.180977	14.1313	2.43707e-45	1.30161e-43
ENSCHIG00000011567	172.16	-2.24408	0.270858	-8.28506	1.18048e-16	1.24899e-15
ENSCHIG00000020673	170.142	2.98456	0.181162	16.4745	5.59263e-61	5.88e-59
ENSCHIG00000019906	169.572	-4.35057	0.492436	-8.83479	1.00284e-18	1.22907e-17
ENSCHIG00000010151	169.57	5.19752	0.39888	13.0303	8.23151e-39	3.24543e-37
ENSCHIG00000023536	169.058	-10.9874	0.663068	-16.5706	1.13757e-61	1.23486e-59
ENSCHIG00000019062	166.005	3.4126	0.355017	9.61248	7.08193e-22	1.07528e-20
ENSCHIG00000016948	165.168	2.51576	0.268094	9.38386	6.36018e-21	9.05648e-20
ENSCHIG00000023627	165.068	-2.69322	0.184542	-14.5941	3.06262e-48	1.91036e-46
ENSCHIG00000018045	164.722	10.4877	0.598289	17.5295	8.52938e-69	1.33258e-66
ENSCHIG00000015305	164.6	2.00556	0.273979	7.32014	2.47713e-13	2.02297e-12
ENSCHIG00000019645	163.064	-10.7547	0.649845	-16.5496	1.61147e-61	1.738e-59
ENSCHIG00000021379	163	3.34846	0.170157	19.6787	3.28248e-86	9.14555e-84
ENSCHIG00000018247	162.943	10.6939	0.632391	16.9103	3.78087e-64	4.45104e-62
ENSCHIG00000021164	158.676	2.44907	0.20657	11.8559	2.00575e-32	5.73164e-31
ENSCHIG00000018693	156.027	3.27445	0.266698	12.2778	1.19266e-34	3.87138e-33
ENSCHIG00000021527	155.978	4.86891	0.311453	15.6329	4.34749e-55	3.70801e-53
ENSCHIG00000000508	153.596	5.94488	0.266378	22.3174	2.50327e-110	1.30772e-107
ENSCHIG00000012379	153.095	-10.4831	0.681981	-15.3716	2.53967e-53	1.97468e-51
ENSCHIG00000018378	153.077	9.26946	0.61929	14.9679	1.19033e-50	8.25677e-49
ENSCHIG00000022162	152.974	4.96594	0.559602	8.87406	7.0525e-19	8.76555e-18
ENSCHIG00000020653	152.942	-3.60273	0.367975	-9.7907	1.2344e-22	1.97847e-21
ENSCHIG00000027061	152.415	-3.80977	0.259468	-14.683	8.28464e-49	5.38888e-47
ENSCHIG00000011736	150.779	2.0313	0.126576	16.0481	5.89527e-58	5.5995e-56
ENSCHIG00000018005	150.649	-10.8211	0.680038	-15.9125	5.19052e-57	4.69027e-55
ENSCHIG00000009709	150.628	-3.47141	0.323227	-10.7398	6.61541e-27	1.37379e-25
ENSCHIG00000017801	150.588	-3.84569	0.280419	-13.7141	8.3604e-43	4.02769e-41
ENSCHIG00000023396	149.695	-2.26948	0.260825	-8.70117	3.28474e-18	3.89993e-17
ENSCHIG00000026103	149.591	2.54071	0.287836	8.82694	1.07582e-18	1.31466e-17
ENSCHIG00000001144	149.278	2.52217	0.157724	15.9911	1.47434e-57	1.3769e-55
ENSCHIG00000019612	148.998	-4.74846	0.335438	-14.156	1.71454e-45	9.27571e-44
ENSCHIG00000012557	147.593	6.6304	0.328266	20.1983	1.0141e-90	3.39053e-88
ENSCHIG00000013192	145.246	-6.24829	0.43618	-14.325	1.52672e-46	8.77053e-45
ENSCHIG00000005275	144.602	-10.7621	0.742802	-14.4885	1.43194e-47	8.70466e-46
ENSCHIG00000010703	143.032	-2.31505	0.166226	-13.9271	4.33563e-44	2.17002e-42
ENSCHIG00000017485	142.954	-8.05277	0.521324	-15.4468	7.93176e-54	6.34427e-52
ENSCHIG00000021260	142.608	6.84648	0.290064	23.6034	3.55833e-123	2.58629e-120
ENSCHIG00000016952	140.938	2.22326	0.286169	7.76907	7.90672e-15	7.26644e-14
ENSCHIG00000008249	140.882	4.52491	0.329664	13.7258	7.11048e-43	3.43543e-41
ENSCHIG00000024755	140.275	-10.7182	0.62921	-17.0344	4.56715e-65	5.74053e-63
ENSCHIG00000006982	139.502	-7.18259	0.462925	-15.5157	2.71699e-54	2.23743e-52
ENSCHIG00000008980	137.54	-3.93872	0.322256	-12.2223	2.36233e-34	7.52211e-33
ENSCHIG00000008697	137.345	2.64198	0.149718	17.6464	1.08531e-69	1.76146e-67
ENSCHIG00000021894	135.318	3.07314	0.399993	7.68298	1.55428e-14	1.38946e-13
ENSCHIG00000024702	134.049	2.16377	0.21515	10.057	8.55595e-24	1.47454e-22
ENSCHIG00000011041	133.54	-9.74361	0.68488	-14.2267	6.25348e-46	3.48465e-44
ENSCHIG00000004105	132.405	-7.13484	0.436286	-16.3536	4.10064e-60	4.15457e-58
ENSCHIG00000003087	132.279	-2.31848	0.199544	-11.6189	3.30307e-31	8.86314e-30
ENSCHIG00000025945	131.257	-3.13072	0.319124	-9.81036	1.01609e-22	1.63957e-21
ENSCHIG00000026063	130.16	-2.50732	0.264796	-9.4689	2.82796e-21	4.12521e-20
ENSCHIG00000022242	130.067	3.80652	0.488221	7.79671	6.35443e-15	5.88841e-14
ENSCHIG00000021006	129.224	4.84574	0.263882	18.3633	2.58442e-75	5.33379e-73
ENSCHIG00000017632	128.766	-2.55541	0.573581	-4.45518	8.3821e-06	3.05347e-05
ENSCHIG00000026715	128.159	2.38548	0.16246	14.6835	8.2247e-49	5.37079e-47
ENSCHIG00000020629	127.974	-2.29446	0.550792	-4.16575	3.10327e-05	0.000103527
ENSCHIG00000020377	127.199	-10.577	0.687163	-15.3923	1.84412e-53	1.44733e-51
ENSCHIG00000002626	126.916	-10.2125	0.655192	-15.5871	8.91195e-55	7.41199e-53
ENSCHIG00000024086	126.2	6.92525	0.374603	18.4869	2.63111e-76	5.78739e-74
ENSCHIG00000004293	125.247	6.03905	0.246291	24.52	9.0379e-133	7.95192e-130
ENSCHIG00000024991	123.337	10.2922	0.600399	17.1422	7.18782e-66	9.6127e-64
ENSCHIG00000014557	123.257	2.12148	0.178844	11.8622	1.86083e-32	5.33576e-31
ENSCHIG00000019198	121.529	5.07165	0.270378	18.7576	1.67686e-78	4.00458e-76
ENSCHIG00000022245	121.417	2.46533	0.197521	12.4813	9.44006e-36	3.22719e-34
ENSCHIG00000010637	121.408	5.78978	0.326387	17.739	2.09634e-70	3.50445e-68
ENSCHIG00000009359	120.789	2.45933	0.228463	10.7647	5.05524e-27	1.06033e-25
ENSCHIG00000004803	120.67	10.261	0.591376	17.3511	1.93401e-67	2.86113e-65
ENSCHIG00000012416	120.285	-2.05927	0.263587	-7.81249	5.60695e-15	5.216e-14
ENSCHIG00000009802	120.194	-2.41534	0.169835	-14.2217	6.72434e-46	3.73458e-44
ENSCHIG00000017819	119.84	3.79441	0.481208	7.88518	3.14072e-15	3.00363e-14
ENSCHIG00000003453	119.608	-2.99358	0.63037	-4.74893	2.04495e-06	8.07974e-06
ENSCHIG00000013564	119.477	2.08911	0.33806	6.17971	6.4218e-10	3.86858e-09
ENSCHIG00000000945	119.398	-4.65468	0.258509	-18.0059	1.75214e-72	3.11601e-70
ENSCHIG00000025880	119.109	-2.24254	0.731771	-3.06454	0.00218007	0.00528559
ENSCHIG00000025030	119.034	10.2409	0.750516	13.6451	2.15947e-42	1.00837e-40
ENSCHIG00000009903	118.978	-2.47767	0.295119	-8.39549	4.6397e-17	5.03976e-16
ENSCHIG00000021699	118.098	6.43472	0.339127	18.9744	2.77816e-80	6.93171e-78
ENSCHIG00000011955	118.08	-4.0936	0.278922	-14.6765	9.11223e-49	5.90423e-47
ENSCHIG00000014178	117.45	-9.02059	0.635467	-14.1952	9.80837e-46	5.37595e-44
ENSCHIG00000010981	117.344	2.32113	0.2416	9.6073	7.44791e-22	1.12778e-20
ENSCHIG00000020547	117.299	2.14349	0.187294	11.4445	2.50523e-30	6.44306e-29
ENSCHIG00000017920	116.979	2.99059	0.175612	17.0295	4.96066e-65	6.18861e-63
ENSCHIG00000011373	116.45	-2.40433	0.369516	-6.5067	7.68218e-11	5.11849e-10
ENSCHIG00000023662	115.953	10.2023	0.588064	17.349	2.00637e-67	2.94216e-65
ENSCHIG00000021593	115.518	-10.0764	0.975996	-10.3243	5.47334e-25	1.02807e-23
ENSCHIG00000024483	115.364	4.34755	0.459778	9.45577	3.20662e-21	4.66943e-20
ENSCHIG00000019533	114.704	2.82471	0.175014	16.1399	1.33698e-58	1.31472e-56
ENSCHIG00000024734	114.442	2.42469	0.405644	5.97738	2.2675e-09	1.27115e-08
ENSCHIG00000007384	114.191	-3.63519	0.355256	-10.2326	1.41691e-24	2.56625e-23
ENSCHIG00000025600	113.899	-10.0562	0.663953	-15.146	8.05106e-52	5.92905e-50
ENSCHIG00000010389	113.828	-10.4166	0.708476	-14.7029	6.17953e-49	4.0511e-47
ENSCHIG00000025926	113.484	4.05904	0.244068	16.6308	4.16831e-62	4.58432e-60
ENSCHIG00000019369	111.617	7.31724	0.369125	19.8232	1.87715e-87	5.60364e-85
ENSCHIG00000016271	108.71	-3.92157	0.345716	-11.3433	8.00319e-30	1.99984e-28
ENSCHIG00000015111	108.429	2.21436	0.205447	10.7783	4.36019e-27	9.16847e-26
ENSCHIG00000026445	108.311	2.13383	0.160069	13.3307	1.53416e-40	6.52585e-39
ENSCHIG00000018886	107.846	2.14189	0.272424	7.86234	3.7701e-15	3.57486e-14
ENSCHIG00000011010	107.447	2.82616	0.301409	9.37652	6.81881e-21	9.6848e-20
ENSCHIG00000021926	107.168	6.25455	0.307268	20.3553	4.16347e-92	1.54668e-89
ENSCHIG00000025213	107.081	-2.20062	0.130385	-16.8778	6.54926e-64	7.60305e-62
ENSCHIG00000020204	106.693	-2.19542	0.289586	-7.58125	3.42252e-14	2.97681e-13
ENSCHIG00000012099	106.144	-2.41841	0.249375	-9.69787	3.07849e-22	4.77618e-21
ENSCHIG00000021187	106.063	4.2557	0.359792	11.8282	2.7893e-32	7.87646e-31
ENSCHIG00000003246	105.27	-2.11874	0.159356	-13.2956	2.45415e-40	1.0334e-38
ENSCHIG00000009860	105.039	-2.12714	0.162436	-13.0952	3.5067e-39	1.40243e-37
ENSCHIG00000011196	104.929	4.1523	0.311895	13.3131	1.94167e-40	8.19668e-39
ENSCHIG00000017301	104.289	4.54531	0.242229	18.7645	1.47374e-78	3.57051e-76
ENSCHIG00000027152	103.75	10.0422	0.61136	16.426	1.24528e-60	1.293e-58
ENSCHIG00000024517	103.478	-2.04083	0.414506	-4.92352	8.50009e-07	3.51894e-06
ENSCHIG00000013189	103.079	-4.7973	0.212959	-22.5269	2.26359e-112	1.26135e-109
ENSCHIG00000014461	102.781	2.88012	0.215601	13.3586	1.05565e-40	4.54827e-39
ENSCHIG00000017353	102.681	10.0269	0.584259	17.1617	5.13966e-66	6.98534e-64
ENSCHIG00000019599	102.418	-2.98539	0.375401	-7.95254	1.82728e-15	1.78635e-14
ENSCHIG00000022933	102.198	-8.81487	0.625002	-14.1037	3.6013e-45	1.9112e-43
ENSCHIG00000025767	102.13	2.10021	0.242183	8.672	4.24586e-18	4.97394e-17
ENSCHIG00000016328	100.222	-2.16205	0.25155	-8.59492	8.3323e-18	9.52092e-17
ENSCHIG00000013676	99.9581	2.27092	0.18554	12.2395	1.91216e-34	6.11197e-33
ENSCHIG00000023586	99.7869	-3.38768	0.238456	-14.2067	8.32475e-46	4.5929e-44
ENSCHIG00000024310	98.9264	2.09068	0.256719	8.14387	3.82848e-16	3.92642e-15
ENSCHIG00000016310	98.1745	-10.2034	0.603155	-16.9168	3.38601e-64	4.04314e-62
ENSCHIG00000014593	97.3384	2.81654	0.236556	11.9064	1.09579e-32	3.16379e-31
ENSCHIG00000003521	96.9279	-2.96977	0.60503	-4.90847	9.17899e-07	3.78223e-06
ENSCHIG00000017768	96.3688	-8.73545	0.648205	-13.4764	2.15488e-41	9.58061e-40
ENSCHIG00000008881	96.2714	-5.59489	0.396212	-14.121	2.82152e-45	1.50214e-43
ENSCHIG00000008338	96.0588	4.24057	0.189574	22.3689	7.90902e-111	4.265e-108
ENSCHIG00000025768	95.9383	3.77204	0.18811	20.0523	1.92548e-89	6.31142e-87
ENSCHIG00000019066	95.7114	-4.19157	0.349593	-11.9899	4.01578e-33	1.18608e-31
ENSCHIG00000017048	95.6892	2.82343	0.350727	8.05021	8.26526e-16	8.29354e-15
ENSCHIG00000021906	95.5207	2.17418	0.11279	19.2764	8.48166e-83	2.21544e-80
ENSCHIG00000012239	95.3723	4.13557	0.3501	11.8126	3.36207e-32	9.44599e-31
ENSCHIG00000021115	95.3032	3.50952	0.318074	11.0337	2.6296e-28	5.9324e-27
ENSCHIG00000022167	94.4984	-9.6056	0.654577	-14.6745	9.38986e-49	6.06063e-47
ENSCHIG00000020966	94.0564	-4.03742	0.290634	-13.8918	7.10446e-44	3.52419e-42
ENSCHIG00000017535	93.9148	2.75882	0.174706	15.7912	3.57834e-56	3.13189e-54
ENSCHIG00000022942	92.9142	-4.12284	0.411735	-10.0133	1.33185e-23	2.26496e-22
ENSCHIG00000009533	92.1899	2.67118	0.161942	16.4947	4.0086e-61	4.26827e-59
ENSCHIG00000022376	92.1661	-7.57231	0.462967	-16.356	3.93863e-60	4.01476e-58
ENSCHIG00000015794	92.0992	3.09298	0.23535	13.142	1.89082e-39	7.67205e-38
ENSCHIG00000013843	92.0321	-4.10904	0.29451	-13.9521	3.05318e-44	1.53735e-42
ENSCHIG00000012548	91.9572	4.20036	0.592168	7.09319	1.31053e-12	1.01286e-11
ENSCHIG00000010918	91.629	9.86382	0.768616	12.8332	1.06812e-37	4.01253e-36
ENSCHIG00000013924	91.0276	4.72644	0.9408	5.02385	5.0645e-07	2.15209e-06
ENSCHIG00000015638	90.8592	2.00734	0.387813	5.17606	2.2662e-07	1.00971e-06
ENSCHIG00000017651	90.6848	-5.05853	0.346051	-14.6179	2.15991e-48	1.36253e-46
ENSCHIG00000007613	89.9303	2.68649	0.14713	18.2593	1.74612e-74	3.4341e-72
ENSCHIG00000020898	89.6971	9.83306	0.64908	15.1492	7.66636e-52	5.67073e-50
ENSCHIG00000013144	88.8425	3.52845	0.20663	17.0762	2.23176e-65	2.91471e-63
ENSCHIG00000015221	88.725	7.48628	0.466277	16.0554	5.23805e-58	5.00369e-56
ENSCHIG00000018327	87.8099	2.00731	0.14987	13.3937	6.58235e-41	2.87303e-39
ENSCHIG00000025678	87.7911	-10.042	0.822497	-12.2091	2.77901e-34	8.7489e-33
ENSCHIG00000014663	87.1487	9.56908	0.664693	14.3963	5.4624e-47	3.20403e-45
ENSCHIG00000013103	86.9597	4.1956	0.193972	21.6299	9.40407e-104	4.76387e-101
ENSCHIG00000025257	86.6609	2.9071	0.22883	12.7042	5.60635e-37	2.0286e-35
ENSCHIG00000010798	86.4807	-2.58386	0.443322	-5.82841	5.59572e-09	3.00493e-08
ENSCHIG00000013135	85.5339	9.76442	0.687371	14.2055	8.47453e-46	4.66015e-44
ENSCHIG00000024628	85.1039	-3.20146	0.532561	-6.01144	1.83884e-09	1.04451e-08
ENSCHIG00000013633	85.0728	3.02494	0.211941	14.2725	3.24653e-46	1.82122e-44
ENSCHIG00000026562	84.7773	-7.98047	0.604554	-13.2006	8.70461e-40	3.57531e-38
ENSCHIG00000021949	84.2101	2.00326	0.166093	12.0611	1.69471e-33	5.09542e-32
ENSCHIG00000018019	83.922	2.08619	0.105445	19.7845	4.04867e-87	1.1874e-84
ENSCHIG00000026507	83.8084	-2.98057	0.403486	-7.38705	1.50126e-13	1.24364e-12
ENSCHIG00000000488	83.1014	5.50075	0.257791	21.338	5.03809e-101	2.3395e-98
ENSCHIG00000017256	83.0574	-3.22369	0.382802	-8.42128	3.72386e-17	4.06874e-16
ENSCHIG00000021073	82.8394	-2.3317	0.273762	-8.51726	1.63368e-17	1.82799e-16
ENSCHIG00000016352	82.4609	2.71614	0.244805	11.0951	1.32452e-28	3.02899e-27
ENSCHIG00000021045	82.1525	2.4406	0.374496	6.51704	7.171e-11	4.79702e-10
ENSCHIG00000013383	81.9006	3.35843	0.328948	10.2096	1.7962e-24	3.24266e-23
ENSCHIG00000010215	81.6243	2.48136	0.198529	12.4987	7.58781e-36	2.59929e-34
ENSCHIG00000026203	81.515	-3.19454	0.583514	-5.47466	4.38357e-08	2.13271e-07
ENSCHIG00000026146	80.8497	-9.92326	1.10016	-9.0198	1.88429e-19	2.43429e-18
ENSCHIG00000024477	79.9276	-6.76856	0.491161	-13.7807	3.32911e-43	1.63205e-41
ENSCHIG00000021203	79.8344	9.66507	0.673548	14.3495	1.07318e-46	6.22931e-45
ENSCHIG00000018021	79.5061	2.73029	0.164167	16.6312	4.1411e-62	4.58432e-60
ENSCHIG00000014127	79.244	3.28168	0.29875	10.9847	4.52881e-28	9.98787e-27
ENSCHIG00000014052	78.5086	3.43235	0.455326	7.53823	4.76399e-14	4.10514e-13
ENSCHIG00000025731	78.364	2.03063	0.168449	12.0548	1.82935e-33	5.49036e-32
ENSCHIG00000023756	78.1338	3.6154	0.16719	21.6244	1.05816e-103	5.20272e-101
ENSCHIG00000016021	77.8265	9.62829	0.833184	11.556	6.88292e-31	1.82277e-29
ENSCHIG00000016688	77.7409	-2.44818	0.444612	-5.50632	3.6641e-08	1.79891e-07
ENSCHIG00000021744	77.554	-2.9519	0.303195	-9.736	2.11723e-22	3.32648e-21
ENSCHIG00000022435	77.0413	2.56941	0.304742	8.43141	3.41525e-17	3.73888e-16
ENSCHIG00000019693	76.9043	2.48187	0.268461	9.2448	2.35671e-20	3.21347e-19
ENSCHIG00000020362	76.8125	2.14573	0.183998	11.6617	2.00032e-31	5.45503e-30
ENSCHIG00000010651	76.743	3.74078	0.20096	18.6145	2.45057e-77	5.53596e-75
ENSCHIG00000021573	76.5032	3.62205	0.199561	18.1501	1.28216e-73	2.35538e-71
ENSCHIG00000016060	76.1794	-2.55095	0.294849	-8.6517	5.07383e-18	5.90252e-17
ENSCHIG00000023822	75.8595	2.81428	0.347991	8.08722	6.10424e-16	6.17704e-15
ENSCHIG00000019758	75.8476	-2.86985	0.611975	-4.68948	2.73897e-06	1.06383e-05
ENSCHIG00000024345	75.6675	2.68266	0.236907	11.3237	1.00161e-29	2.49538e-28
ENSCHIG00000013839	75.4642	2.08349	0.200037	10.4155	2.10579e-25	4.03235e-24
ENSCHIG00000013684	75.3091	2.02961	0.23213	8.74344	2.26118e-18	2.70775e-17
ENSCHIG00000014573	74.8481	-3.22819	0.229086	-14.0916	4.27611e-45	2.25501e-43
ENSCHIG00000022780	74.8448	3.41612	0.242934	14.062	6.50545e-45	3.41986e-43
ENSCHIG00000027207	74.6406	3.37592	0.411333	8.20727	2.26269e-16	2.34794e-15
ENSCHIG00000012923	74.3622	-5.82455	0.585909	-9.94105	2.75908e-23	4.59856e-22
ENSCHIG00000016201	73.955	-2.96968	0.211915	-14.0136	1.28787e-44	6.70697e-43
ENSCHIG00000011126	73.7074	8.88131	0.590967	15.0284	4.78107e-51	3.34415e-49
ENSCHIG00000024391	73.6536	-2.17765	0.206679	-10.5364	5.87117e-26	1.16427e-24
ENSCHIG00000012912	73.1884	-3.40343	0.235422	-14.4567	2.27405e-47	1.35286e-45
ENSCHIG00000012120	73.0793	5.92631	0.371468	15.9538	2.68243e-57	2.47747e-55
ENSCHIG00000014280	72.7948	-2.26831	0.235547	-9.62998	5.9739e-22	9.11184e-21
ENSCHIG00000022634	72.5528	2.17182	0.198476	10.9425	7.22144e-28	1.56984e-26
ENSCHIG00000019371	72.4854	-3.23744	0.418636	-7.73332	1.04781e-14	9.50932e-14
ENSCHIG00000018646	72.0023	7.44958	0.50268	14.8197	1.09217e-49	7.33243e-48
ENSCHIG00000012479	71.9076	-4.23109	0.473626	-8.9334	4.13113e-19	5.21602e-18
ENSCHIG00000016197	71.5687	9.50736	0.650667	14.6117	2.36502e-48	1.48632e-46
ENSCHIG00000022293	71.4866	3.3906	0.166865	20.3194	8.66617e-92	3.08239e-89
ENSCHIG00000007676	70.7194	-7.46561	0.519951	-14.3583	9.45324e-47	5.50626e-45
ENSCHIG00000022785	70.2725	-3.19747	0.240138	-13.3151	1.89034e-40	8.00023e-39
ENSCHIG00000020431	70.0686	4.03062	0.223273	18.0524	7.54908e-73	1.35697e-70
ENSCHIG00000003073	69.9823	3.30531	0.155723	21.2256	5.53825e-100	2.50224e-97
ENSCHIG00000015503	69.7273	2.94237	0.28571	10.2985	7.15983e-25	1.33286e-23
ENSCHIG00000021904	69.6398	-2.00854	0.246156	-8.15963	3.36046e-16	3.45703e-15
ENSCHIG00000020639	69.5907	9.46533	0.582932	16.2375	2.74051e-59	2.7433e-57
ENSCHIG00000022749	68.8287	2.10448	0.187732	11.2101	3.63881e-29	8.70242e-28
ENSCHIG00000011836	68.7105	2.03604	0.167679	12.1425	6.28902e-34	1.9326e-32
ENSCHIG00000026003	68.6373	4.39651	0.250145	17.5758	3.77405e-69	5.95197e-67
ENSCHIG00000004358	68.6284	-6.9173	0.527061	-13.1243	2.3906e-39	9.62981e-38
ENSCHIG00000009050	68.5566	3.48016	0.256117	13.5882	4.70664e-42	2.14975e-40
ENSCHIG00000012711	68.2784	-5.21278	0.568883	-9.1632	5.03824e-20	6.74873e-19
ENSCHIG00000022811	67.9015	-9.67126	0.651906	-14.8354	8.65346e-50	5.92869e-48
ENSCHIG00000025595	67.845	2.26306	0.29098	7.77736	7.40558e-15	6.82841e-14
ENSCHIG00000017334	67.7376	-9.66811	0.623945	-15.4951	3.74227e-54	3.03687e-52
ENSCHIG00000009914	67.5021	-5.45478	0.37669	-14.4808	1.60121e-47	9.62859e-46
ENSCHIG00000025842	67.0314	2.79046	0.134641	20.7252	2.05239e-95	8.57743e-93
ENSCHIG00000023599	66.8848	2.16894	0.336463	6.44629	1.14624e-10	7.49672e-10
ENSCHIG00000021130	66.6781	-3.39896	0.234683	-14.4832	1.5478e-47	9.37486e-46
ENSCHIG00000014472	66.5548	-3.56302	0.294419	-12.1019	1.03241e-33	3.15518e-32
ENSCHIG00000017623	66.2601	-6.51948	0.511379	-12.7488	3.16542e-37	1.16045e-35
ENSCHIG00000001685	66.2587	-3.17061	0.37399	-8.47781	2.29467e-17	2.54715e-16
ENSCHIG00000003569	66.1643	-2.83967	0.252136	-11.2624	2.01126e-29	4.90836e-28
ENSCHIG00000014474	65.8489	2.50563	0.148788	16.8403	1.23707e-63	1.41644e-61
ENSCHIG00000026823	65.7521	4.84757	0.688023	7.04566	1.84591e-12	1.41033e-11
ENSCHIG00000026119	65.3036	2.06033	0.216382	9.52174	1.70306e-21	2.50837e-20
ENSCHIG00000016843	65.1588	2.02574	0.21533	9.40757	5.07732e-21	7.27937e-20
ENSCHIG00000008125	64.6385	4.45098	0.293142	15.1837	4.5328e-52	3.3828e-50
ENSCHIG00000012495	64.2468	7.01641	0.45643	15.3724	2.50837e-53	1.95946e-51
ENSCHIG00000001150	64.0296	-8.86255	0.619968	-14.2952	2.3453e-46	1.32903e-44
ENSCHIG00000021677	63.8193	-4.75099	0.444777	-10.6817	1.23935e-26	2.54212e-25
ENSCHIG00000018896	63.7251	-2.71527	0.340751	-7.96848	1.60636e-15	1.57869e-14
ENSCHIG00000024845	63.4972	-2.02798	0.393112	-5.15878	2.48566e-07	1.10161e-06
ENSCHIG00000019728	63.4579	2.87111	0.145256	19.7659	5.85417e-87	1.68731e-84
ENSCHIG00000019888	63.4351	3.57564	0.286796	12.4675	1.12274e-35	3.8148e-34
ENSCHIG00000023193	63.3585	4.94495	0.247971	19.9417	1.77005e-88	5.4796e-86
ENSCHIG00000006042	63.11	2.36261	0.225136	10.4941	9.19107e-26	1.79915e-24
ENSCHIG00000017242	62.8391	2.43569	0.229657	10.6058	2.80187e-26	5.64324e-25
ENSCHIG00000014068	62.1688	-4.71279	0.319982	-14.7283	4.24191e-49	2.80285e-47
ENSCHIG00000023060	61.9626	-3.31196	0.252323	-13.1259	2.34135e-39	9.4542e-38
ENSCHIG00000009715	61.8143	2.15902	0.223907	9.64246	5.29051e-22	8.09903e-21
ENSCHIG00000009936	61.7405	-3.54101	0.235084	-15.0627	2.84837e-51	2.02622e-49
ENSCHIG00000014835	61.7356	-9.35286	0.652591	-14.3319	1.38315e-46	7.97314e-45
ENSCHIG00000004836	61.7179	3.5129	0.255263	13.7619	4.31944e-43	2.09907e-41
ENSCHIG00000022314	61.6267	-4.69189	0.254	-18.472	3.46672e-76	7.52638e-74
ENSCHIG00000020729	61.5721	2.09486	0.357858	5.85387	4.80255e-09	2.60156e-08
ENSCHIG00000022837	61.4317	2.03506	0.124208	16.3843	2.47609e-60	2.55511e-58
ENSCHIG00000017286	61.0991	2.48789	0.203603	12.2193	2.45093e-34	7.78938e-33
ENSCHIG00000026451	61.0293	-4.80214	0.383952	-12.5071	6.8236e-36	2.35196e-34
ENSCHIG00000003875	60.5704	3.53755	0.31774	11.1335	8.62125e-29	1.99338e-27
ENSCHIG00000010402	60.5397	3.05023	0.27703	11.0105	3.40217e-28	7.60349e-27
ENSCHIG00000013577	60.4157	-2.42583	0.603578	-4.01908	5.84265e-05	0.000187003
ENSCHIG00000012371	60.1106	-6.52881	0.450248	-14.5005	1.20286e-47	7.36567e-46
ENSCHIG00000016270	60.1044	-3.06824	0.274755	-11.1672	5.90133e-29	1.3934e-27
ENSCHIG00000008645	60.0227	2.11505	0.198423	10.6593	1.57722e-26	3.21934e-25
ENSCHIG00000022339	59.9733	-9.31114	0.788872	-11.8031	3.76193e-32	1.05517e-30
ENSCHIG00000010676	59.8795	2.11405	0.182963	11.5545	7.00146e-31	1.84903e-29
ENSCHIG00000006681	59.8517	-7.33968	0.503018	-14.5913	3.19096e-48	1.98302e-46
ENSCHIG00000018162	59.77	2.24005	0.142702	15.6974	1.57497e-55	1.35715e-53
ENSCHIG00000021670	59.2441	-6.56039	0.423612	-15.4868	4.25984e-54	3.42364e-52
ENSCHIG00000014303	59.1463	3.85493	0.194289	19.8412	1.31221e-87	3.98839e-85
ENSCHIG00000022851	59.099	-2.13009	0.252414	-8.43885	3.20485e-17	3.51776e-16
ENSCHIG00000001740	58.9109	-2.2517	0.568665	-3.95963	7.50668e-05	0.000235793
ENSCHIG00000012268	58.7052	2.54856	0.188394	13.5278	1.07214e-41	4.87039e-40
ENSCHIG00000022636	58.6627	-2.56655	0.301736	-8.50593	1.80142e-17	2.00896e-16
ENSCHIG00000013942	58.4675	-4.79246	0.323291	-14.824	1.02515e-49	6.93824e-48
ENSCHIG00000010042	58.3082	-5.36965	0.41391	-12.973	1.74068e-38	6.78299e-37
ENSCHIG00000018998	58.297	2.67558	0.20893	12.8061	1.5152e-37	5.65393e-36
ENSCHIG00000018468	58.2315	-3.00405	0.398973	-7.52947	5.09484e-14	4.38571e-13
ENSCHIG00000000665	57.6604	2.17715	0.159492	13.6505	2.00445e-42	9.46565e-41
ENSCHIG00000011774	57.1775	-9.42363	0.677562	-13.9081	5.65274e-44	2.8208e-42
ENSCHIG00000022769	56.9584	4.67169	0.472267	9.89204	4.5075e-23	7.39469e-22
ENSCHIG00000017258	56.7877	2.33293	0.206201	11.3138	1.12074e-29	2.77975e-28
ENSCHIG00000004184	56.6609	-9.04796	0.639343	-14.152	1.81593e-45	9.79254e-44
ENSCHIG00000026712	56.6377	9.17031	0.633997	14.4643	2.03679e-47	1.21603e-45
ENSCHIG00000007906	56.5673	-3.68629	0.35501	-10.3836	2.94361e-25	5.57285e-24
ENSCHIG00000018589	56.2779	2.54949	0.196807	12.9543	2.22218e-38	8.59911e-37
ENSCHIG00000019464	56.1589	3.04362	0.330301	9.2147	3.12155e-20	4.23562e-19
ENSCHIG00000011086	55.8692	2.0342	0.279865	7.26851	3.63464e-13	2.93933e-12
ENSCHIG00000027246	55.6833	4.459	0.269778	16.5284	2.29139e-61	2.45545e-59
ENSCHIG00000011802	55.556	2.10885	0.213696	9.86846	5.70348e-23	9.32015e-22
ENSCHIG00000016340	55.4578	9.13996	0.646186	14.1445	2.02064e-45	1.08615e-43
ENSCHIG00000014791	55.1652	-8.64662	0.67712	-12.7697	2.42051e-37	8.93239e-36
ENSCHIG00000000324	54.6542	2.69283	0.359176	7.49725	6.51721e-14	5.56142e-13
ENSCHIG00000011784	54.5882	-2.66489	0.181733	-14.6638	1.0998e-48	7.0173e-47
ENSCHIG00000017471	54.562	2.37031	0.141082	16.8009	2.40184e-63	2.71294e-61
ENSCHIG00000016509	54.4874	-2.32149	0.186038	-12.4786	9.77056e-36	3.33336e-34
ENSCHIG00000023996	54.3869	3.31425	0.36915	8.97806	2.75578e-19	3.53015e-18
ENSCHIG00000021854	54.3637	-2.11374	0.197801	-10.6862	1.18127e-26	2.42595e-25
ENSCHIG00000007488	53.8476	-2.33562	0.198539	-11.764	5.98083e-32	1.66914e-30
ENSCHIG00000021984	53.7018	-2.17345	0.232226	-9.35923	8.03201e-21	1.13213e-19
ENSCHIG00000016468	53.6897	3.25853	0.216646	15.0408	3.96604e-51	2.79748e-49
ENSCHIG00000013289	53.5412	-2.44262	0.490019	-4.98474	6.20458e-07	2.60608e-06
ENSCHIG00000027269	53.2626	2.07027	0.446287	4.63888	3.50308e-06	1.34284e-05
ENSCHIG00000026704	52.7621	2.98516	0.451315	6.61435	3.73177e-11	2.57042e-10
ENSCHIG00000022843	52.6193	-5.06714	0.743471	-6.81552	9.39238e-12	6.8207e-11
ENSCHIG00000008233	52.589	9.0608	0.584768	15.4947	3.76766e-54	3.0427e-52
ENSCHIG00000019778	52.1268	2.41249	0.180363	13.3757	8.38275e-41	3.63985e-39
ENSCHIG00000010385	51.3741	3.21384	0.199271	16.1279	1.62342e-58	1.58706e-56
ENSCHIG00000026731	51.2927	2.1074	0.383709	5.49217	3.97023e-08	1.94179e-07
ENSCHIG00000025785	51.1072	2.09552	0.19042	11.0047	3.62591e-28	8.0927e-27
ENSCHIG00000014529	51.1032	2.34191	0.202702	11.5535	7.09079e-31	1.86672e-29
ENSCHIG00000019880	50.6523	-2.06222	0.135565	-15.2121	2.94101e-52	2.22465e-50
ENSCHIG00000007239	50.535	8.55812	0.603762	14.1747	1.3147e-45	7.13564e-44
ENSCHIG00000025909	50.4949	5.72412	0.333999	17.1381	7.70876e-66	1.02276e-63
ENSCHIG00000015583	49.836	-5.79135	0.390498	-14.8307	9.28119e-50	6.3328e-48
ENSCHIG00000015403	49.7583	-2.11423	0.445044	-4.75059	2.02819e-06	8.01544e-06
ENSCHIG00000023120	49.7293	2.07513	0.240148	8.64107	5.56902e-18	6.44718e-17
ENSCHIG00000018607	49.7204	8.08928	0.819561	9.87026	5.60186e-23	9.16304e-22
ENSCHIG00000024623	49.2667	2.01585	0.189735	10.6246	2.29079e-26	4.65312e-25
ENSCHIG00000022712	48.994	-4.5914	0.551325	-8.32794	8.2262e-17	8.7983e-16
ENSCHIG00000017234	48.9753	-2.03576	0.251934	-8.08054	6.44823e-16	6.50936e-15
ENSCHIG00000010221	48.9304	2.06044	0.177014	11.64	2.58063e-31	6.96937e-30
ENSCHIG00000022191	48.8803	-8.65341	0.633912	-13.6508	1.99695e-42	9.45694e-41
ENSCHIG00000026638	48.7542	3.65087	0.28384	12.8624	7.32415e-38	2.76383e-36
ENSCHIG00000023093	48.4436	2.00573	0.35541	5.64342	1.66702e-08	8.49879e-08
ENSCHIG00000022298	48.3067	-5.23534	0.377064	-13.8845	7.86601e-44	3.89042e-42
ENSCHIG00000016564	48.0232	-9.17184	0.6323	-14.5055	1.11796e-47	6.87095e-46
ENSCHIG00000005207	47.9591	-5.95281	0.398986	-14.9199	2.44751e-50	1.68374e-48
ENSCHIG00000008265	47.9494	2.4268	0.217196	11.1733	5.50995e-29	1.30467e-27
ENSCHIG00000005102	47.9296	8.9285	0.914582	9.76238	1.63271e-22	2.59203e-21
ENSCHIG00000013671	47.8374	-3.04972	0.29585	-10.3083	6.46143e-25	1.20688e-23
ENSCHIG00000007800	47.4144	-2.07202	0.16203	-12.7878	1.91715e-37	7.10622e-36
ENSCHIG00000019058	46.8658	-2.10492	0.462333	-4.55282	5.2932e-06	1.98311e-05
ENSCHIG00000022508	46.6728	-2.79915	0.203339	-13.766	4.08422e-43	1.99055e-41
ENSCHIG00000020871	46.6519	-2.20311	0.177854	-12.3872	3.06675e-35	1.0172e-33
ENSCHIG00000003712	46.5219	-9.12587	1.63309	-5.58809	2.29581e-08	1.15253e-07
ENSCHIG00000016224	46.3714	2.20825	0.228484	9.66477	4.25555e-22	6.55669e-21
ENSCHIG00000013164	46.1937	-6.85579	0.573116	-11.9623	5.59864e-33	1.63053e-31
ENSCHIG00000016529	46.0815	-5.4005	0.421605	-12.8094	1.45288e-37	5.4335e-36
ENSCHIG00000012189	46.0341	2.55009	0.334527	7.62296	2.4793e-14	2.18484e-13
ENSCHIG00000014242	45.8853	2.18376	0.296613	7.36234	1.80711e-13	1.49173e-12
ENSCHIG00000018307	45.8257	5.57543	0.331337	16.8271	1.54592e-63	1.75804e-61
ENSCHIG00000011217	45.702	-3.537	0.252802	-13.9912	1.76447e-44	9.04807e-43
ENSCHIG00000006615	45.6698	2.98124	0.267539	11.1432	7.73031e-29	1.79483e-27
ENSCHIG00000015669	45.5263	-2.57981	0.28014	-9.209	3.29192e-20	4.45957e-19
ENSCHIG00000009873	45.4803	-4.67665	0.349378	-13.3856	7.33676e-41	3.19397e-39
ENSCHIG00000002609	45.4597	-3.39826	0.324386	-10.476	1.11406e-25	2.17313e-24
ENSCHIG00000012868	45.1915	3.51542	0.210252	16.72	9.36971e-63	1.05123e-60
ENSCHIG00000017679	45.1236	2.60659	0.234984	11.0926	1.36218e-28	3.11086e-27
ENSCHIG00000011521	44.9731	-9.07657	0.698187	-13.0002	1.22027e-38	4.77734e-37
ENSCHIG00000012389	44.9232	-5.74328	0.378009	-15.1935	3.90546e-52	2.9277e-50
ENSCHIG00000005194	44.9201	2.10438	0.358186	5.87509	4.22607e-09	2.30196e-08
ENSCHIG00000017613	44.9027	3.01393	0.276795	10.8887	1.30505e-27	2.80057e-26
ENSCHIG00000023418	44.616	-5.67524	0.393898	-14.4079	4.61648e-47	2.72699e-45
ENSCHIG00000007034	44.2001	2.15247	0.150938	14.2606	3.85065e-46	2.15289e-44
ENSCHIG00000015486	44.0301	3.64001	0.179788	20.2462	3.84111e-91	1.33775e-88
ENSCHIG00000011298	43.8276	3.44534	0.388589	8.86627	7.56403e-19	9.35265e-18
ENSCHIG00000013245	43.6602	2.35225	0.176064	13.3602	1.03348e-40	4.46425e-39
ENSCHIG00000024161	43.6018	2.81989	0.254632	11.0744	1.67057e-28	3.79958e-27
ENSCHIG00000020938	43.5726	-9.03136	0.68521	-13.1804	1.13747e-39	4.66056e-38
ENSCHIG00000022795	43.4498	-4.60174	0.336979	-13.6559	1.8627e-42	8.84625e-41
ENSCHIG00000024614	43.43	2.52676	0.316366	7.98684	1.38443e-15	1.3654e-14
ENSCHIG00000014253	43.2551	-2.5292	0.17058	-14.8271	9.79345e-50	6.65517e-48
ENSCHIG00000023202	42.8969	-7.91965	0.668003	-11.8557	2.01012e-32	5.73434e-31
ENSCHIG00000012292	42.8963	-2.35061	0.158868	-14.796	1.55547e-49	1.03597e-47
ENSCHIG00000014477	42.893	8.76914	0.762073	11.507	1.217e-30	3.18383e-29
ENSCHIG00000021710	42.8833	8.76955	0.642579	13.6474	2.09114e-42	9.81955e-41
ENSCHIG00000026727	42.65	4.56674	0.340637	13.4065	5.5416e-41	2.4251e-39
ENSCHIG00000022948	42.6113	4.77219	0.38955	12.2505	1.66911e-34	5.38659e-33
ENSCHIG00000022415	42.5803	2.47838	0.248516	9.97275	2.0059e-23	3.3735e-22
ENSCHIG00000020772	42.3805	-8.99084	0.694478	-12.9462	2.46935e-38	9.51153e-37
ENSCHIG00000026266	42.3675	-2.03636	0.276861	-7.35515	1.90713e-13	1.56974e-12
ENSCHIG00000017325	42.2551	-4.81311	0.298924	-16.1015	2.49127e-58	2.42131e-56
ENSCHIG00000011323	41.8693	-3.19945	0.278894	-11.4719	1.82581e-30	4.73211e-29
ENSCHIG00000021766	41.816	-3.97827	0.363494	-10.9445	7.06004e-28	1.53675e-26
ENSCHIG00000014464	41.5269	3.30528	0.420967	7.85164	4.10618e-15	3.87813e-14
ENSCHIG00000015915	41.2105	8.48714	0.581699	14.5903	3.2396e-48	2.00579e-46
ENSCHIG00000021348	41.0886	-4.39493	0.343258	-12.8036	1.56525e-37	5.82769e-36
ENSCHIG00000019749	41.0877	-8.03833	0.620743	-12.9495	2.36398e-38	9.12672e-37
ENSCHIG00000015889	41.0004	-8.9442	0.655791	-13.6388	2.35411e-42	1.09013e-40
ENSCHIG00000024410	40.9517	2.05324	0.210343	9.76135	1.64937e-22	2.6135e-21
ENSCHIG00000026294	40.9017	3.91952	0.246227	15.9183	4.72804e-57	4.29558e-55
ENSCHIG00000010468	40.7599	-2.45305	0.224918	-10.9064	1.07391e-27	2.32244e-26
ENSCHIG00000020762	40.6859	3.05332	0.32419	9.41831	4.58394e-21	6.58331e-20
ENSCHIG00000019791	40.675	-4.88676	0.332122	-14.7137	5.26107e-49	3.46257e-47
ENSCHIG00000010467	40.3882	-3.04809	0.533615	-5.71215	1.11559e-08	5.7917e-08
ENSCHIG00000027133	40.2859	4.49487	0.263589	17.0526	3.34463e-65	4.30094e-63
ENSCHIG00000023941	40.2549	6.33069	0.560994	11.2848	1.56025e-29	3.84135e-28
ENSCHIG00000014840	40.1858	-2.54089	0.346662	-7.3296	2.30839e-13	1.88978e-12
ENSCHIG00000026797	40.0876	-2.00518	0.29442	-6.81062	9.71779e-12	7.04171e-11
ENSCHIG00000013553	40.0861	2.03528	0.2373	8.57683	9.75272e-18	1.1106e-16
ENSCHIG00000008680	39.9401	2.17388	0.197395	11.0129	3.31326e-28	7.43461e-27
ENSCHIG00000010484	39.6186	-7.11881	0.494248	-14.4033	4.9322e-47	2.90322e-45
ENSCHIG00000014222	39.5653	2.45806	0.189982	12.9384	2.73331e-38	1.05014e-36
ENSCHIG00000011821	39.4948	3.71854	0.260174	14.2925	2.43759e-46	1.37666e-44
ENSCHIG00000019938	39.3389	-3.26518	0.294468	-11.0884	1.42814e-28	3.25705e-27
ENSCHIG00000002189	39.3326	-8.33832	0.631446	-13.2051	8.19711e-40	3.37515e-38
ENSCHIG00000007539	39.2784	2.34251	0.255597	9.16483	4.96267e-20	6.65284e-19
ENSCHIG00000024115	39.2091	2.27116	0.322476	7.0429	1.88278e-12	1.43784e-11
ENSCHIG00000024347	39.1759	3.98022	0.266241	14.9497	1.56537e-50	1.08133e-48
ENSCHIG00000015151	39.1205	-3.80636	0.310548	-12.2569	1.54303e-34	4.98934e-33
ENSCHIG00000013024	39.0198	2.94572	0.164604	17.8958	1.27259e-71	2.21603e-69
ENSCHIG00000002934	38.9851	4.07215	0.286415	14.2176	7.12155e-46	3.94209e-44
ENSCHIG00000025508	38.8584	4.99651	0.293993	16.9953	8.89132e-65	1.09291e-62
ENSCHIG00000012025	38.8122	2.62737	0.269934	9.73338	2.17257e-22	3.41022e-21
ENSCHIG00000009334	38.7295	-2.29703	0.947385	-2.4246	0.0153253	0.0308741
ENSCHIG00000010136	38.5758	-5.09609	0.454825	-11.2045	3.87518e-29	9.24128e-28
ENSCHIG00000023639	38.5536	-7.40475	0.625749	-11.8334	2.62232e-32	7.41747e-31
ENSCHIG00000023633	38.5242	3.55854	0.245943	14.469	1.90318e-47	1.14034e-45
ENSCHIG00000019421	38.3855	3.17265	0.2796	11.3471	7.66555e-30	1.91834e-28
ENSCHIG00000003071	38.3803	-2.0861	0.18579	-11.2283	2.96172e-29	7.14446e-28
ENSCHIG00000019519	38.3738	2.91464	0.45667	6.38237	1.74366e-10	1.11852e-09
ENSCHIG00000014184	38.199	2.04847	0.213363	9.60088	7.92685e-22	1.19597e-20
ENSCHIG00000014116	38.197	-8.84172	0.724734	-12.1999	3.11054e-34	9.77422e-33
ENSCHIG00000014293	37.9927	-2.69337	0.213745	-12.6009	2.0888e-36	7.39799e-35
ENSCHIG00000009412	37.9728	8.59235	0.694278	12.3759	3.52724e-35	1.16531e-33
ENSCHIG00000027084	37.9211	-2.93124	0.323295	-9.06676	1.22607e-19	1.60001e-18
ENSCHIG00000021859	37.8249	3.328	0.240466	13.8398	1.46641e-43	7.23126e-42
ENSCHIG00000015933	37.7903	-5.12371	0.380927	-13.4507	3.05144e-41	1.34949e-39
ENSCHIG00000015496	37.7848	-2.74691	0.668875	-4.10675	4.01259e-05	0.000131656
ENSCHIG00000022873	37.6431	-2.37093	0.208629	-11.3643	6.29453e-30	1.58472e-28
ENSCHIG00000018972	37.6353	4.99355	0.321363	15.5387	1.89937e-54	1.57187e-52
ENSCHIG00000018125	37.5916	-7.90988	0.63143	-12.5269	5.31786e-36	1.84437e-34
ENSCHIG00000007275	37.4703	-2.16565	0.173186	-12.5048	7.03098e-36	2.41349e-34
ENSCHIG00000017686	37.4235	-2.95764	0.269516	-10.9739	5.10165e-28	1.12216e-26
ENSCHIG00000025961	37.307	8.56496	0.584217	14.6606	1.15286e-48	7.3279e-47
ENSCHIG00000021954	37.2489	-2.08934	0.199114	-10.4932	9.28384e-26	1.81518e-24
ENSCHIG00000023405	37.2281	-2.23678	0.168469	-13.2771	3.14318e-40	1.3169e-38
ENSCHIG00000012435	37.0553	-2.46311	0.35084	-7.02061	2.20903e-12	1.67628e-11
ENSCHIG00000021893	36.9492	2.71621	0.231574	11.7293	9.01682e-32	2.49147e-30
ENSCHIG00000010319	36.7713	-8.78686	0.698932	-12.5718	3.01656e-36	1.05941e-34
ENSCHIG00000017272	36.6596	8.09504	0.614304	13.1776	1.18106e-39	4.82735e-38
ENSCHIG00000017496	36.4961	-4.34395	0.261733	-16.5969	7.33703e-62	8.01655e-60
ENSCHIG00000005334	36.4889	2.34921	0.336848	6.97409	3.07856e-12	2.30885e-11
ENSCHIG00000012346	36.4384	-8.77342	0.626273	-14.0089	1.37448e-44	7.09409e-43
ENSCHIG00000008525	36.1515	2.82151	0.400255	7.04928	1.79841e-12	1.3753e-11
ENSCHIG00000011350	36.0985	3.14387	0.256405	12.2613	1.46074e-34	4.73241e-33
ENSCHIG00000007668	35.8982	-3.25251	0.405047	-8.02995	9.7509e-16	9.72009e-15
ENSCHIG00000018215	35.7477	-8.01886	1.04108	-7.70243	1.33502e-14	1.20051e-13
ENSCHIG00000026589	35.7463	7.8362	0.828907	9.45366	3.27186e-21	4.75614e-20
ENSCHIG00000018847	35.7368	-5.75344	0.411955	-13.9662	2.50697e-44	1.26613e-42
ENSCHIG00000026755	35.6705	5.93983	0.40501	14.6659	1.06623e-48	6.82916e-47
ENSCHIG00000020912	35.6589	8.50062	0.615839	13.8033	2.43338e-43	1.19644e-41
ENSCHIG00000011226	35.6417	-2.76722	0.296026	-9.3479	8.94026e-21	1.25486e-19
ENSCHIG00000024307	35.5789	-4.03869	0.376973	-10.7135	8.79731e-27	1.81114e-25
ENSCHIG00000021899	35.4507	-2.07707	0.592052	-3.50826	0.000451042	0.00124485
ENSCHIG00000010381	35.2705	-3.46262	0.341711	-10.1332	3.9354e-24	6.93236e-23
ENSCHIG00000005263	35.1836	-8.72352	0.772754	-11.2889	1.48941e-29	3.67233e-28
ENSCHIG00000025630	35.18	2.51588	0.227267	11.0702	1.75054e-28	3.97067e-27
ENSCHIG00000012694	35.1645	8.03563	1.04608	7.68165	1.57052e-14	1.40323e-13
ENSCHIG00000016836	35.1062	3.52176	0.229501	15.3453	3.80663e-53	2.91906e-51
ENSCHIG00000024776	35.0923	-2.70384	0.261921	-10.3231	5.53952e-25	1.03933e-23
ENSCHIG00000021110	34.9065	-2.76756	0.214232	-12.9185	3.5376e-38	1.35018e-36
ENSCHIG00000015013	34.8775	-4.03737	0.262753	-15.3657	2.7821e-53	2.15316e-51
ENSCHIG00000024746	34.6697	4.98597	0.310028	16.0823	3.39344e-58	3.27908e-56
ENSCHIG00000014836	34.661	-8.69936	0.546206	-15.9269	4.12281e-57	3.78687e-55
ENSCHIG00000010240	34.646	-8.70095	0.68649	-12.6746	8.18181e-37	2.94141e-35
ENSCHIG00000022219	34.628	-3.68516	0.432977	-8.51123	1.72093e-17	1.92176e-16
ENSCHIG00000013932	34.6163	-8.51732	0.652432	-13.0547	5.97235e-39	2.37149e-37
ENSCHIG00000011245	34.4289	2.03928	0.284819	7.1599	8.0733e-13	6.35411e-12
ENSCHIG00000026618	34.3404	-2.97834	0.201158	-14.8059	1.34113e-49	8.96784e-48
ENSCHIG00000012432	34.182	4.27853	0.384247	11.1349	8.48836e-29	1.96537e-27
ENSCHIG00000009653	34.144	3.93843	0.326283	12.0706	1.51072e-33	4.55039e-32
ENSCHIG00000025270	34.1429	2.85058	0.160813	17.726	2.64036e-70	4.37018e-68
ENSCHIG00000018835	34.117	-2.35652	0.161437	-14.5972	2.92681e-48	1.83249e-46
ENSCHIG00000005514	33.9364	-3.93639	0.252525	-15.5881	8.768e-55	7.32873e-53
ENSCHIG00000024433	33.9024	4.58925	0.28653	16.0166	9.77802e-58	9.23498e-56
ENSCHIG00000022689	33.75	3.28959	0.191061	17.2175	1.96285e-66	2.7574e-64
ENSCHIG00000008514	33.655	6.21047	0.48941	12.6897	6.74532e-37	2.4302e-35
ENSCHIG00000019755	33.4991	2.27571	0.237768	9.57114	1.05729e-21	1.57108e-20
ENSCHIG00000021796	33.4797	8.41135	0.784436	10.7228	7.95578e-27	1.64193e-25
ENSCHIG00000016640	33.4573	3.41856	0.665585	5.13617	2.80391e-07	1.23415e-06
ENSCHIG00000025871	33.4322	3.41711	0.233643	14.6254	1.93547e-48	1.22558e-46
ENSCHIG00000012481	33.256	-3.72477	0.300339	-12.4019	2.55184e-35	8.53183e-34
ENSCHIG00000023933	33.0627	2.661	0.25303	10.5165	7.24798e-26	1.43051e-24
ENSCHIG00000013844	33.0579	2.39442	0.354801	6.74864	1.49238e-11	1.06072e-10
ENSCHIG00000019582	32.9507	8.16233	0.579029	14.0966	3.98636e-45	2.10886e-43
ENSCHIG00000008261	32.8084	-5.28129	0.373486	-14.1405	2.13626e-45	1.14461e-43
ENSCHIG00000024608	32.5505	-5.8945	0.453157	-13.0076	1.10717e-38	4.34472e-37
ENSCHIG00000015100	32.4507	-3.48678	0.295597	-11.7957	4.10828e-32	1.15039e-30
ENSCHIG00000014291	32.4443	3.1857	0.19324	16.4857	4.64779e-61	4.91754e-59
ENSCHIG00000024280	32.4058	2.00077	0.184826	10.8251	2.61699e-27	5.5168e-26
ENSCHIG00000001085	32.3976	-3.20903	0.212788	-15.0809	2.16299e-51	1.54524e-49
ENSCHIG00000009328	32.3838	-8.60273	1.01678	-8.46073	2.65708e-17	2.93966e-16
ENSCHIG00000026625	32.0969	8.12447	0.579929	14.0094	1.36548e-44	7.08903e-43
ENSCHIG00000019917	32.0211	5.49241	0.383176	14.3339	1.34335e-46	7.77051e-45
ENSCHIG00000021365	31.9957	-2.54597	0.445556	-5.71413	1.10266e-08	5.72813e-08
ENSCHIG00000020542	31.9859	2.22877	0.335927	6.6347	3.25162e-11	2.25269e-10
ENSCHIG00000023344	31.7856	3.59822	0.396212	9.08155	1.07036e-19	1.4045e-18
ENSCHIG00000015162	31.7052	8.33086	0.605129	13.7671	4.02098e-43	1.96546e-41
ENSCHIG00000010618	31.7032	-3.70991	0.327583	-11.3251	9.85743e-30	2.4595e-28
ENSCHIG00000018573	31.5048	4.34494	0.388161	11.1936	4.38082e-29	1.04174e-27
ENSCHIG00000027267	31.4962	2.1476	0.3474	6.18191	6.33291e-10	3.8233e-09
ENSCHIG00000023416	31.4184	-3.0235	0.647058	-4.67268	2.97294e-06	1.14937e-05
ENSCHIG00000026286	31.3118	2.86746	0.335792	8.5394	1.34926e-17	1.51992e-16
ENSCHIG00000006887	31.2083	-4.32568	0.763302	-5.66706	1.45266e-08	7.46283e-08
ENSCHIG00000013419	31.1942	-2.25647	0.182651	-12.354	4.63692e-35	1.5289e-33
ENSCHIG00000013015	31.1471	-2.35482	0.473088	-4.97756	6.43917e-07	2.69919e-06
ENSCHIG00000019540	30.8998	-7.98966	0.638902	-12.5053	6.9836e-36	2.40216e-34
ENSCHIG00000013085	30.8284	-8.53187	0.623803	-13.6772	1.3895e-42	6.61775e-41
ENSCHIG00000018073	30.8168	2.11612	0.408674	5.17802	2.24249e-07	9.99403e-07
ENSCHIG00000017728	30.6021	2.64171	0.173788	15.2008	3.49557e-52	2.63223e-50
ENSCHIG00000021209	30.5925	3.3568	0.245078	13.6969	1.05993e-42	5.07702e-41
ENSCHIG00000014903	30.4812	7.15592	0.584238	12.2483	1.71564e-34	5.52606e-33
ENSCHIG00000009912	30.4079	-3.88646	0.397486	-9.77759	1.40516e-22	2.24142e-21
ENSCHIG00000022747	30.2118	8.26394	0.75236	10.984	4.56186e-28	1.00475e-26
ENSCHIG00000017922	30.1989	3.19627	0.318878	10.0235	1.20182e-23	2.05217e-22
ENSCHIG00000026307	30.0657	-3.03442	0.42267	-7.17917	7.01359e-13	5.5488e-12
ENSCHIG00000006724	30.0572	6.04571	0.495047	12.2124	2.66912e-34	8.41882e-33
ENSCHIG00000003874	30.0475	-2.11371	0.394273	-5.36103	8.27495e-08	3.88465e-07
ENSCHIG00000006004	30.0056	8.25387	0.611047	13.5078	1.4074e-41	6.32459e-40
ENSCHIG00000015696	29.944	-8.49007	0.674053	-12.5956	2.23363e-36	7.87757e-35
ENSCHIG00000012743	29.8047	-2.22775	0.187935	-11.8538	2.05591e-32	5.85497e-31
ENSCHIG00000012031	29.7783	-8.48217	0.716332	-11.8411	2.39244e-32	6.79023e-31
ENSCHIG00000013849	29.7705	-3.40402	0.28562	-11.918	9.53865e-33	2.75878e-31
ENSCHIG00000019453	29.6338	-2.32588	0.216556	-10.7403	6.58322e-27	1.3688e-25
ENSCHIG00000006080	29.4418	-2.58537	0.199462	-12.9617	2.01605e-38	7.81958e-37
ENSCHIG00000025298	29.4414	2.04386	0.166325	12.2883	1.04641e-34	3.40991e-33
ENSCHIG00000019284	29.3819	3.26125	0.204394	15.9557	2.60133e-57	2.41591e-55
ENSCHIG00000002460	29.2085	3.25164	0.252367	12.8846	5.49526e-38	2.09258e-36
ENSCHIG00000020434	29.1564	-8.45139	0.638282	-13.2408	5.09753e-40	2.11979e-38
ENSCHIG00000010205	29.1548	-2.2148	0.208827	-10.6059	2.79704e-26	5.6403e-25
ENSCHIG00000016695	29.086	2.97364	0.235032	12.6521	1.0894e-36	3.89967e-35
ENSCHIG00000026198	29.036	-5.11259	0.401458	-12.7351	3.77604e-37	1.37825e-35
ENSCHIG00000019003	28.8077	-4.60738	0.350026	-13.163	1.43313e-39	5.8291e-38
ENSCHIG00000010235	28.8005	2.26338	0.228441	9.90793	3.84531e-23	6.33945e-22
ENSCHIG00000004277	28.4212	-2.63354	0.389777	-6.75653	1.41335e-11	1.00855e-10
ENSCHIG00000018601	28.4156	5.0133	0.409694	12.2367	1.97884e-34	6.31302e-33
ENSCHIG00000013425	28.2814	2.13469	0.198977	10.7283	7.49571e-27	1.55081e-25
ENSCHIG00000014688	28.2706	-3.74317	0.320679	-11.6726	1.75896e-31	4.81252e-30
ENSCHIG00000025775	28.2432	2.21186	0.256419	8.62597	6.35538e-18	7.34736e-17
ENSCHIG00000023493	28.1144	-2.3873	0.222092	-10.7492	5.98082e-27	1.2451e-25
ENSCHIG00000001552	28.0099	2.52492	0.223066	11.3191	1.05492e-29	2.62037e-28
ENSCHIG00000026040	27.6057	4.89716	0.350385	13.9765	2.1685e-44	1.10185e-42
ENSCHIG00000013388	27.5021	-2.79476	0.393827	-7.09642	1.2803e-12	9.89956e-12
ENSCHIG00000016627	27.4784	2.43037	0.316274	7.68438	1.53745e-14	1.37626e-13
ENSCHIG00000001958	27.2086	3.32627	0.236783	14.0478	7.95203e-45	4.16721e-43
ENSCHIG00000019014	27.1862	-2.05952	0.16864	-12.2126	2.66354e-34	8.41709e-33
ENSCHIG00000011341	27.164	-3.0133	0.406582	-7.41129	1.25079e-13	1.04235e-12
ENSCHIG00000022791	27.1634	-7.07501	0.643221	-10.9993	3.84924e-28	8.56828e-27
ENSCHIG00000013275	27.1601	2.13781	0.3017	7.08589	1.38155e-12	1.06578e-11
ENSCHIG00000024108	26.9848	2.76961	0.27405	10.1062	5.18497e-24	9.06664e-23
ENSCHIG00000009677	26.9283	-2.76961	0.248876	-11.1285	9.11849e-29	2.10253e-27
ENSCHIG00000011975	26.8338	2.32316	0.328118	7.08024	1.43904e-12	1.10859e-11
ENSCHIG00000008602	26.8011	-6.05395	0.520317	-11.6351	2.73206e-31	7.36641e-30
ENSCHIG00000012393	26.7939	-2.38291	0.42976	-5.54474	2.94388e-08	1.46076e-07
ENSCHIG00000010210	26.7548	2.10206	0.264666	7.94232	1.98436e-15	1.93201e-14
ENSCHIG00000009100	26.7433	2.66549	0.262429	10.157	3.08379e-24	5.47259e-23
ENSCHIG00000011599	26.7256	2.66159	0.442176	6.0193	1.75173e-09	9.98419e-09
ENSCHIG00000020146	26.6565	-2.02076	0.520484	-3.88246	0.000103404	0.000317
ENSCHIG00000012500	26.6377	-3.43157	0.275624	-12.4502	1.39503e-35	4.72079e-34
ENSCHIG00000008359	26.6305	-2.66378	0.190149	-14.0089	1.37494e-44	7.09409e-43
ENSCHIG00000015994	26.6214	2.25265	0.273922	8.2237	1.97317e-16	2.05645e-15
ENSCHIG00000011773	26.5848	3.23742	0.214283	15.1081	1.43104e-51	1.03561e-49
ENSCHIG00000013747	26.5346	3.40784	0.302197	11.2769	1.70677e-29	4.19373e-28
ENSCHIG00000018089	26.4441	-3.09459	0.311327	-9.94002	2.78782e-23	4.63949e-22
ENSCHIG00000027251	26.1991	-7.93342	0.608011	-13.0481	6.51097e-39	2.57924e-37
ENSCHIG00000019962	26.1658	3.15542	0.236435	13.3458	1.25245e-40	5.36853e-39
ENSCHIG00000010979	26.098	3.80577	0.247823	15.3568	3.18731e-53	2.45541e-51
ENSCHIG00000018582	26.095	-2.01017	0.428726	-4.68871	2.7493e-06	1.06735e-05
ENSCHIG00000014504	26.0818	-4.57084	0.33914	-13.4777	2.11465e-41	9.42681e-40
ENSCHIG00000013332	26.0703	-2.24917	0.28996	-7.75683	8.70801e-15	7.97653e-14
ENSCHIG00000011973	26.0451	-2.12041	0.232549	-9.11812	7.64421e-20	1.00939e-18
ENSCHIG00000026310	25.8965	-3.42459	0.418567	-8.18169	2.79894e-16	2.89184e-15
ENSCHIG00000014229	25.7392	-5.19303	0.41716	-12.4485	1.42451e-35	4.81081e-34
ENSCHIG00000022818	25.701	4.93064	0.340305	14.4889	1.42365e-47	8.68583e-46
ENSCHIG00000026780	25.684	-3.6645	0.359075	-10.2054	1.87562e-24	3.38239e-23
ENSCHIG00000001881	25.5718	-2.53025	0.472593	-5.35399	8.60372e-08	4.02994e-07
ENSCHIG00000015608	25.4183	2.39822	0.301554	7.95286	1.82262e-15	1.78284e-14
ENSCHIG00000010779	25.336	-2.46758	0.545173	-4.52623	6.00448e-06	2.23209e-05
ENSCHIG00000018865	25.2669	-3.64734	0.385734	-9.45559	3.21207e-21	4.67329e-20
ENSCHIG00000001672	25.1927	-4.02944	0.279516	-14.4158	4.11685e-47	2.44047e-45
ENSCHIG00000020419	25.1459	2.1152	0.253473	8.3449	7.12766e-17	7.65765e-16
ENSCHIG00000026791	25.0783	3.5403	0.427089	8.28939	1.13828e-16	1.20587e-15
ENSCHIG00000024407	25.0646	-3.59329	0.463362	-7.75481	8.84758e-15	8.08666e-14
ENSCHIG00000012817	24.9675	-2.88808	0.191022	-15.1191	1.21195e-51	8.84727e-50
ENSCHIG00000024039	24.9649	7.76345	0.584521	13.2817	2.95548e-40	1.24138e-38
ENSCHIG00000002020	24.9333	-3.4033	0.220433	-15.4391	8.92958e-54	7.10837e-52
ENSCHIG00000024815	24.9181	-3.17973	0.350126	-9.08169	1.06902e-19	1.40384e-18
ENSCHIG00000010605	24.8704	6.86048	0.594426	11.5413	8.16393e-31	2.14249e-29
ENSCHIG00000005363	24.7929	-2.84133	0.212948	-13.3428	1.30482e-40	5.57868e-39
ENSCHIG00000024718	24.7688	-2.24709	0.174597	-12.8701	6.63141e-38	2.51948e-36
ENSCHIG00000021890	24.7517	-2.19952	0.244838	-8.98357	2.62117e-19	3.36286e-18
ENSCHIG00000025367	24.7243	2.25421	0.280327	8.04135	8.88528e-16	8.889e-15
ENSCHIG00000000415	24.7132	2.3027	0.234568	9.8168	9.53248e-23	1.53966e-21
ENSCHIG00000015460	24.6063	-4.30561	0.412636	-10.4344	1.72718e-25	3.32259e-24
ENSCHIG00000015946	24.584	-8.02339	0.598121	-13.4143	4.98402e-41	2.18682e-39
ENSCHIG00000012394	24.565	2.40633	0.217674	11.0548	2.07897e-28	4.70285e-27
ENSCHIG00000013785	24.5354	2.82214	0.239857	11.7659	5.84786e-32	1.63476e-30
ENSCHIG00000011914	24.4388	-5.01779	0.458771	-10.9375	7.62995e-28	1.65649e-26
ENSCHIG00000025286	24.3003	-5.01553	0.526134	-9.53279	1.53107e-21	2.26303e-20
ENSCHIG00000017691	24.2393	2.45651	0.191317	12.84	9.78767e-38	3.68514e-36
ENSCHIG00000023649	24.2132	2.09248	0.196242	10.6628	1.52002e-26	3.10638e-25
ENSCHIG00000000167	24.1909	-2.1094	0.239993	-8.78944	1.50307e-18	1.82343e-17
ENSCHIG00000024288	24.1085	-2.67588	0.411434	-6.5038	7.83164e-11	5.21392e-10
ENSCHIG00000008696	24.0331	4.51455	0.348229	12.9643	1.95023e-38	7.58184e-37
ENSCHIG00000021548	23.937	-2.23852	0.246965	-9.06413	1.25605e-19	1.63786e-18
ENSCHIG00000008205	23.9361	2.61467	0.218259	11.9797	4.53962e-33	1.33372e-31
ENSCHIG00000012659	23.7539	-2.35096	0.314215	-7.48201	7.31971e-14	6.22082e-13
ENSCHIG00000025100	23.7198	2.61653	0.329125	7.94995	1.86591e-15	1.82305e-14
ENSCHIG00000018535	23.6835	-4.06009	0.351406	-11.5538	7.05986e-31	1.86151e-29
ENSCHIG00000009163	23.6514	-2.51146	0.311862	-8.05312	8.07111e-16	8.10846e-15
ENSCHIG00000025267	23.6236	-7.78324	0.630185	-12.3507	4.82733e-35	1.58855e-33
ENSCHIG00000026211	23.5172	2.40091	0.35855	6.69616	2.1396e-11	1.49781e-10
ENSCHIG00000023846	23.456	-8.13706	0.646977	-12.577	2.82398e-36	9.93861e-35
ENSCHIG00000026700	23.4336	2.54914	0.246825	10.3277	5.27902e-25	9.92681e-24
ENSCHIG00000010511	23.4084	7.89324	0.712779	11.0739	1.67924e-28	3.8141e-27
ENSCHIG00000020376	23.3871	3.67653	0.280055	13.1279	2.2801e-39	9.22916e-38
ENSCHIG00000024691	23.3184	3.53385	0.39706	8.90006	5.58189e-19	6.97924e-18
ENSCHIG00000008175	23.3113	-8.12921	0.956956	-8.49486	1.98175e-17	2.20713e-16
ENSCHIG00000024023	23.3047	3.13641	0.22886	13.7045	9.54447e-43	4.58491e-41
ENSCHIG00000016550	23.2902	7.66279	0.685146	11.1842	4.87507e-29	1.15762e-27
ENSCHIG00000010774	23.2722	-2.10535	0.286741	-7.34232	2.09925e-13	1.72194e-12
ENSCHIG00000012779	23.2715	-2.15845	0.38974	-5.53818	3.05627e-08	1.51517e-07
ENSCHIG00000004675	23.258	-2.87018	0.253714	-11.3126	1.13624e-29	2.80984e-28
ENSCHIG00000026552	23.1189	-3.60686	0.341597	-10.5588	4.62483e-26	9.248e-25
ENSCHIG00000002663	23.1166	-3.08834	0.318371	-9.70046	3.00145e-22	4.66312e-21
ENSCHIG00000011780	23.1165	-2.24736	0.252594	-8.89712	5.73142e-19	7.16085e-18
ENSCHIG00000008870	23.0837	-4.34208	0.323483	-13.4229	4.44023e-41	1.9585e-39
ENSCHIG00000007326	23.0444	-2.18035	0.300134	-7.26458	3.7419e-13	3.0219e-12
ENSCHIG00000024716	23.026	-2.48769	0.271303	-9.16941	4.75621e-20	6.38632e-19
ENSCHIG00000027055	22.9387	2.87019	0.335909	8.54455	1.29041e-17	1.45559e-16
ENSCHIG00000022820	22.9342	-3.3989	0.249767	-13.6083	3.5765e-42	1.64706e-40
ENSCHIG00000023265	22.9256	3.97516	0.284461	13.9744	2.23529e-44	1.13234e-42
ENSCHIG00000015700	22.914	-2.18598	0.21235	-10.2942	7.4819e-25	1.38972e-23
ENSCHIG00000025386	22.8837	3.2836	0.218947	14.9972	7.65581e-51	5.33259e-49
ENSCHIG00000015845	22.8607	2.62993	0.198867	13.2246	6.33106e-40	2.61971e-38
ENSCHIG00000017991	22.8346	-7.00457	0.68266	-10.2607	1.05944e-24	1.94196e-23
ENSCHIG00000005534	22.8128	-5.02128	0.369383	-13.5937	4.3656e-42	2.00494e-40
ENSCHIG00000020661	22.6275	4.47266	0.330983	13.5132	1.30633e-41	5.88621e-40
ENSCHIG00000012030	22.5372	-4.57341	0.391345	-11.6864	1.49583e-31	4.1128e-30
ENSCHIG00000019335	22.5306	-6.29892	0.612075	-10.2911	7.7297e-25	1.43416e-23
ENSCHIG00000024473	22.529	3.36211	0.275819	12.1896	3.53273e-34	1.10593e-32
ENSCHIG00000021799	22.5187	2.00532	0.230283	8.70807	3.09087e-18	3.67497e-17
ENSCHIG00000020949	22.4997	5.06992	0.416626	12.169	4.54568e-34	1.41246e-32
ENSCHIG00000009525	22.4331	2.37753	0.344947	6.89244	5.48434e-12	4.05313e-11
ENSCHIG00000011663	22.432	2.63274	0.193001	13.6411	2.2815e-42	1.06239e-40
ENSCHIG00000014428	22.3821	2.418	0.22909	10.5548	4.82615e-26	9.62754e-25
ENSCHIG00000011184	22.2461	-2.29464	0.259006	-8.85941	8.04407e-19	9.90956e-18
ENSCHIG00000017774	22.2087	7.82122	0.605197	12.9234	3.32067e-38	1.27029e-36
ENSCHIG00000025222	22.1107	3.7813	0.277244	13.6389	2.35103e-42	1.09013e-40
ENSCHIG00000022140	22.1019	2.31177	0.575538	4.01671	5.90166e-05	0.000188783
ENSCHIG00000004756	22.0758	2.19625	0.294856	7.44856	9.43651e-14	7.97523e-13
ENSCHIG00000007723	22.0175	-2.39013	0.217515	-10.9883	4.34818e-28	9.62763e-27
ENSCHIG00000011829	21.9335	-2.06772	0.220357	-9.3835	6.38174e-21	9.07944e-20
ENSCHIG00000021210	21.9117	-8.03949	0.722411	-11.1287	9.09663e-29	2.10039e-27
ENSCHIG00000023775	21.724	2.09425	0.401246	5.21937	1.79536e-07	8.10505e-07
ENSCHIG00000000181	21.66	2.18764	0.190534	11.4816	1.63142e-30	4.24806e-29
ENSCHIG00000021782	21.6537	-4.36931	0.376925	-11.592	4.52471e-31	1.20637e-29
ENSCHIG00000024247	21.6238	5.0107	0.579713	8.64341	5.45593e-18	6.32941e-17
ENSCHIG00000023883	21.5254	-8.01296	0.724815	-11.0552	2.06943e-28	4.68762e-27
ENSCHIG00000007586	21.4434	-2.10095	0.22618	-9.28881	1.56016e-20	2.15547e-19
ENSCHIG00000011290	21.3577	2.04778	0.423458	4.83586	1.32572e-06	5.35702e-06
ENSCHIG00000018900	21.2385	-2.62379	0.338195	-7.75823	8.61211e-15	7.89735e-14
ENSCHIG00000011317	21.2302	-4.84645	0.36954	-13.1148	2.70861e-39	1.08846e-37
ENSCHIG00000009696	21.1785	4.19813	0.34465	12.1809	3.93083e-34	1.22596e-32
ENSCHIG00000007610	21.1209	2.08446	0.378388	5.5088	3.61286e-08	1.77632e-07
ENSCHIG00000018219	21.0819	-7.61803	0.636295	-11.9725	4.95282e-33	1.45002e-31
ENSCHIG00000020323	21.0667	-2.99846	0.202931	-14.7757	2.10031e-49	1.39329e-47
ENSCHIG00000026925	20.9905	-2.15797	0.171267	-12.6	2.11108e-36	7.46109e-35
ENSCHIG00000013455	20.9697	-7.97536	0.693837	-11.4946	1.40482e-30	3.6637e-29
ENSCHIG00000026391	20.9405	6.83809	0.656434	10.417	2.07341e-25	3.9749e-24
ENSCHIG00000017224	20.9404	3.79327	0.339786	11.1637	6.13946e-29	1.44554e-27
ENSCHIG00000024519	20.7765	-3.48968	0.320813	-10.8776	1.4733e-27	3.14951e-26
ENSCHIG00000025689	20.7562	-3.38592	0.247303	-13.6914	1.14325e-42	5.46048e-41
ENSCHIG00000025819	20.739	-7.59382	0.600049	-12.6553	1.04529e-36	3.74981e-35
ENSCHIG00000012142	20.6947	-2.39279	0.562846	-4.25123	2.12602e-05	7.27697e-05
ENSCHIG00000020814	20.6542	2.35122	0.242558	9.69343	3.2155e-22	4.98178e-21
ENSCHIG00000001960	20.6397	2.17705	0.255701	8.51405	1.67968e-17	1.87695e-16
ENSCHIG00000010666	20.6381	-2.10891	0.599589	-3.51726	0.000436022	0.00120738
ENSCHIG00000024957	20.6236	2.16017	0.261271	8.26794	1.36295e-16	1.43298e-15
ENSCHIG00000024988	20.6015	3.09051	0.236602	13.0621	5.42435e-39	2.15902e-37
ENSCHIG00000008983	20.5254	-7.94537	0.654111	-12.1468	5.9642e-34	1.83616e-32
ENSCHIG00000017433	20.5058	7.7051	0.637179	12.0925	1.15669e-33	3.50296e-32
ENSCHIG00000022550	20.4984	2.14908	0.278622	7.71324	1.2266e-14	1.10754e-13
ENSCHIG00000024728	20.4633	-5.46169	0.479905	-11.3808	5.21382e-30	1.31661e-28
ENSCHIG00000022874	20.4025	-2.87961	0.311391	-9.24754	2.29711e-20	3.13476e-19
ENSCHIG00000016512	20.3392	-2.7964	0.689972	-4.05292	5.05825e-05	0.000163241
ENSCHIG00000023114	20.3014	7.46386	0.625665	11.9295	8.30778e-33	2.40695e-31
ENSCHIG00000016367	20.2674	3.98307	0.343853	11.5836	4.98918e-31	1.32598e-29
ENSCHIG00000015504	20.212	-3.78366	0.417695	-9.05843	1.32336e-19	1.72161e-18
ENSCHIG00000018278	20.0815	-2.26954	0.194223	-11.6852	1.51736e-31	4.16515e-30
ENSCHIG00000011418	20.0768	-7.73141	0.615417	-12.5629	3.37817e-36	1.18144e-34
ENSCHIG00000013199	20.0191	6.54342	0.579596	11.2896	1.47658e-29	3.64608e-28
ENSCHIG00000012230	20.018	2.72412	0.245143	11.1124	1.09241e-28	2.51193e-27
ENSCHIG00000025882	20.0004	7.66462	0.601814	12.7359	3.73711e-37	1.36703e-35
ENSCHIG00000020793	19.9656	-4.04167	0.401605	-10.0638	7.98656e-24	1.37925e-22
ENSCHIG00000000964	19.8992	-5.84319	0.49452	-11.8159	3.23118e-32	9.09355e-31
ENSCHIG00000018016	19.8823	2.30409	0.251838	9.1491	5.74099e-20	7.67777e-19
ENSCHIG00000024573	19.8586	2.30065	0.417636	5.50875	3.61385e-08	1.77632e-07
ENSCHIG00000021424	19.8444	-2.14652	0.265985	-8.0701	7.0241e-16	7.07361e-15
ENSCHIG00000001248	19.8199	-3.82514	0.471958	-8.10483	5.28189e-16	5.38071e-15
ENSCHIG00000016543	19.8116	-2.42596	0.378566	-6.4083	1.47153e-10	9.51993e-10
ENSCHIG00000000395	19.766	-2.23886	0.550184	-4.06929	4.71575e-05	0.000152807
ENSCHIG00000014632	19.526	7.40515	0.607038	12.1988	3.15364e-34	9.89107e-33
ENSCHIG00000009295	19.5161	-7.87316	0.742239	-10.6073	2.75567e-26	5.56468e-25
ENSCHIG00000026757	19.5099	3.40201	0.281194	12.0985	1.07622e-33	3.27113e-32
ENSCHIG00000019429	19.4684	3.47433	0.27496	12.6358	1.34094e-36	4.75933e-35
ENSCHIG00000008361	19.4528	7.62629	0.615354	12.3933	2.83987e-35	9.4382e-34
ENSCHIG00000023475	19.3964	2.33782	0.293366	7.96895	1.60024e-15	1.5736e-14
ENSCHIG00000015673	19.3171	-2.00402	0.175315	-11.431	2.92725e-30	7.50535e-29
ENSCHIG00000009435	19.2815	3.4299	0.30069	11.4068	3.86874e-30	9.85879e-29
ENSCHIG00000013689	19.2232	-7.30028	0.583088	-12.52	5.80031e-36	2.00753e-34
ENSCHIG00000017659	19.179	-7.8473	0.674905	-11.6273	2.99541e-31	8.06349e-30
ENSCHIG00000014024	19.096	-6.92637	0.592364	-11.6928	1.38807e-31	3.82278e-30
ENSCHIG00000015373	19.0555	7.59805	0.629243	12.0749	1.43328e-33	4.32492e-32
ENSCHIG00000010158	18.9999	-3.42778	0.245186	-13.9803	2.05507e-44	1.04778e-42
ENSCHIG00000025294	18.9047	-2.04051	0.257288	-7.93085	2.17658e-15	2.113e-14
ENSCHIG00000010567	18.8617	3.35092	0.2875	11.6554	2.15447e-31	5.86586e-30
ENSCHIG00000001352	18.8449	-7.82101	0.8113	-9.64009	5.41384e-22	8.27269e-21
ENSCHIG00000014349	18.8147	3.15754	0.350541	9.00764	2.10547e-19	2.71373e-18
ENSCHIG00000012181	18.7841	7.57349	0.588751	12.8637	7.20854e-38	2.72636e-36
ENSCHIG00000025398	18.7711	7.57693	1.00754	7.52027	5.46642e-14	4.6959e-13
ENSCHIG00000007760	18.6809	7.5694	0.727096	10.4105	2.22152e-25	4.24911e-24
ENSCHIG00000013100	18.5724	2.02396	0.450367	4.49401	6.98931e-06	2.57584e-05
ENSCHIG00000014492	18.5485	-2.0962	0.237237	-8.83586	9.93297e-19	1.21826e-17
ENSCHIG00000024854	18.5049	6.43276	0.585009	10.996	3.9948e-28	8.86866e-27
ENSCHIG00000013879	18.4396	-7.78954	0.637576	-12.2174	2.50898e-34	7.95875e-33
ENSCHIG00000014396	18.4394	-2.09464	0.38613	-5.4247	5.80509e-08	2.77903e-07
ENSCHIG00000008294	18.392	4.60041	0.408753	11.2547	2.19458e-29	5.34014e-28
ENSCHIG00000012602	18.3526	-7.784	0.661962	-11.759	6.34928e-32	1.76607e-30
ENSCHIG00000002156	18.3067	-7.77938	0.628485	-12.378	3.43805e-35	1.1381e-33
ENSCHIG00000021612	18.2832	-4.31583	0.428801	-10.0649	7.89837e-24	1.36543e-22
ENSCHIG00000013558	18.2082	-3.08108	0.450477	-6.83961	7.94114e-12	5.79957e-11
ENSCHIG00000025273	18.192	4.96807	0.506807	9.80268	1.09638e-22	1.76402e-21
ENSCHIG00000023504	18.0977	4.26679	0.655587	6.50835	7.59795e-11	5.06641e-10
ENSCHIG00000019162	18.0656	-3.27979	0.343698	-9.54264	1.39243e-21	2.06176e-20
ENSCHIG00000008551	18.0613	3.17175	0.249164	12.7295	4.05272e-37	1.47602e-35
ENSCHIG00000009101	18.0016	7.5178	0.646822	11.6227	3.16109e-31	8.49582e-30
ENSCHIG00000009367	17.9621	2.29151	0.326898	7.00986	2.38557e-12	1.80451e-11
ENSCHIG00000021956	17.9518	3.82931	0.321766	11.9009	1.17087e-32	3.37472e-31
ENSCHIG00000014174	17.9435	-2.97471	0.310078	-9.59341	8.52177e-22	1.27995e-20
ENSCHIG00000014257	17.9105	-2.63723	0.367627	-7.17365	7.30261e-13	5.76927e-12
ENSCHIG00000026623	17.9011	-3.09257	0.253998	-12.1756	4.19522e-34	1.30599e-32
ENSCHIG00000013703	17.879	2.02322	0.232312	8.70904	3.06469e-18	3.65164e-17
ENSCHIG00000000646	17.8254	-7.7405	0.63662	-12.1587	5.15441e-34	1.59567e-32
ENSCHIG00000018500	17.7445	-2.54541	0.190919	-13.3324	1.49993e-40	6.3965e-39
ENSCHIG00000021221	17.6483	2.36108	0.236392	9.98801	1.72004e-23	2.91031e-22
ENSCHIG00000015909	17.6061	6.13717	0.644472	9.5228	1.6858e-21	2.48514e-20
ENSCHIG00000022515	17.5457	-2.2266	0.222269	-10.0176	1.27598e-23	2.17216e-22
ENSCHIG00000017151	17.538	4.0498	0.656058	6.17293	6.70372e-10	4.01527e-09
ENSCHIG00000011582	17.4909	-2.48341	0.246054	-10.0929	5.93625e-24	1.03371e-22
ENSCHIG00000010536	17.4664	2.17743	0.324327	6.71368	1.89779e-11	1.33524e-10
ENSCHIG00000022880	17.4657	-2.32088	0.2036	-11.3992	4.22025e-30	1.07056e-28
ENSCHIG00000019173	17.4563	-5.66485	0.503764	-11.245	2.44988e-29	5.95232e-28
ENSCHIG00000020498	17.3195	2.85467	0.281828	10.1291	4.10316e-24	7.22027e-23
ENSCHIG00000012906	17.2217	2.92318	0.304762	9.59166	8.66831e-22	1.29962e-20
ENSCHIG00000008640	17.0874	2.22732	0.200971	11.0828	1.52036e-28	3.46266e-27
ENSCHIG00000010643	17.0223	3.17361	0.698793	4.54156	5.58395e-06	2.08509e-05
ENSCHIG00000004634	16.9555	-2.87064	0.352769	-8.13744	4.03716e-16	4.13536e-15
ENSCHIG00000025745	16.9395	4.84444	0.424635	11.4085	3.79237e-30	9.67894e-29
ENSCHIG00000015490	16.8769	2.61273	0.264038	9.89528	4.36373e-23	7.1729e-22
ENSCHIG00000023836	16.8689	3.96361	0.318332	12.4512	1.37792e-35	4.67234e-34
ENSCHIG00000008358	16.8656	6.07806	0.731145	8.31307	9.32544e-17	9.95488e-16
ENSCHIG00000013475	16.8167	5.48657	0.491375	11.1657	5.99936e-29	1.41455e-27
ENSCHIG00000021662	16.8075	-2.15917	0.212214	-10.1745	2.57682e-24	4.62693e-23
ENSCHIG00000016341	16.7459	-6.91341	0.537392	-12.8648	7.10664e-38	2.69391e-36
ENSCHIG00000013287	16.7365	-2.32923	0.208684	-11.1615	6.29066e-29	1.47906e-27
ENSCHIG00000011749	16.6671	-2.29537	0.452396	-5.07381	3.89937e-07	1.68569e-06
ENSCHIG00000015739	16.6626	-7.64574	0.823418	-9.28537	1.61148e-20	2.22269e-19
ENSCHIG00000017504	16.6259	-3.68482	0.316533	-11.6412	2.54447e-31	6.88284e-30
ENSCHIG00000007733	16.5745	-7.6356	0.643088	-11.8733	1.62842e-32	4.68541e-31
ENSCHIG00000012382	16.5071	6.04407	0.630208	9.5906	8.75782e-22	1.31187e-20
ENSCHIG00000006946	16.4272	-6.88689	0.628465	-10.9583	6.06439e-28	1.32868e-26
ENSCHIG00000020488	16.3743	-7.61846	0.629832	-12.096	1.10865e-33	3.36359e-32
ENSCHIG00000017237	16.3732	3.02023	0.294374	10.2598	1.06899e-24	1.95732e-23
ENSCHIG00000010989	16.2917	-7.61207	1.50748	-5.04954	4.42869e-07	1.89881e-06
ENSCHIG00000023612	16.2902	2.40521	0.225964	10.6442	1.85502e-26	3.77715e-25
ENSCHIG00000017533	16.2693	-2.7275	0.294508	-9.2612	2.02154e-20	2.76774e-19
ENSCHIG00000007892	16.251	3.27423	0.416829	7.85509	3.99491e-15	3.77731e-14
ENSCHIG00000023048	16.1962	7.36519	0.606021	12.1533	5.5064e-34	1.70149e-32
ENSCHIG00000020633	16.1876	2.19876	0.434693	5.0582	4.23227e-07	1.82113e-06
ENSCHIG00000012395	16.1767	3.29991	0.278721	11.8395	2.43933e-32	6.91156e-31
ENSCHIG00000004716	16.1469	-7.60183	0.535992	-14.1827	1.17177e-45	6.38063e-44
ENSCHIG00000008826	16.1464	-7.59727	0.662723	-11.4637	2.00707e-30	5.1858e-29
ENSCHIG00000009741	16.0211	2.78164	0.277658	10.0183	1.26718e-23	2.15937e-22
ENSCHIG00000017307	16.011	-7.5869	0.616632	-12.3038	8.64316e-35	2.83309e-33
ENSCHIG00000024549	16.0018	-7.58793	0.626533	-12.111	9.23695e-34	2.8281e-32
ENSCHIG00000019726	15.9732	7.34128	0.60377	12.1591	5.13359e-34	1.59217e-32
ENSCHIG00000017342	15.9037	3.7037	0.326356	11.3486	7.53291e-30	1.88797e-28
ENSCHIG00000012720	15.8738	-2.08966	0.274845	-7.60305	2.89242e-14	2.53287e-13
ENSCHIG00000023411	15.8476	5.24075	0.475965	11.0108	3.38971e-28	7.59432e-27
ENSCHIG00000007230	15.6948	-5.50827	0.567771	-9.70157	2.96909e-22	4.61714e-21
ENSCHIG00000024664	15.6544	-2.47544	0.24913	-9.93636	2.89191e-23	4.8008e-22
ENSCHIG00000014082	15.5296	7.30582	0.601383	12.1484	5.85237e-34	1.80506e-32
ENSCHIG00000026878	15.5213	-2.16834	0.349383	-6.20619	5.4283e-10	3.30944e-09
ENSCHIG00000023910	15.4469	-4.72739	0.750344	-6.30029	2.9708e-10	1.86352e-09
ENSCHIG00000026886	15.4346	2.20301	0.270226	8.15247	3.5657e-16	3.66141e-15
ENSCHIG00000007513	15.2787	-3.13219	0.345425	-9.06762	1.21645e-19	1.58994e-18
ENSCHIG00000002001	15.2341	2.34071	0.272158	8.60055	7.93336e-18	9.07748e-17
ENSCHIG00000018947	15.1547	5.9136	0.575598	10.2738	9.24559e-25	1.70594e-23
ENSCHIG00000014425	15.103	7.26338	0.585803	12.399	2.64615e-35	8.82948e-34
ENSCHIG00000013639	14.9493	6.79658	0.687195	9.89033	4.5851e-23	7.51461e-22
ENSCHIG00000012968	14.9308	-3.18008	0.422629	-7.5245	5.29218e-14	4.55324e-13
ENSCHIG00000024759	14.9105	-7.30114	0.665544	-10.9702	5.31564e-28	1.16616e-26
ENSCHIG00000022328	14.8624	6.56245	0.793415	8.27114	1.32681e-16	1.39939e-15
ENSCHIG00000024959	14.8313	-2.25647	0.246164	-9.16651	4.88594e-20	6.55524e-19
ENSCHIG00000010537	14.8133	-5.41357	0.473168	-11.4411	2.60463e-30	6.68843e-29
ENSCHIG00000008229	14.8123	-4.72125	0.460548	-10.2514	1.16651e-24	2.12888e-23
ENSCHIG00000017276	14.7909	7.23417	0.818223	8.84132	9.45947e-19	1.16104e-17
ENSCHIG00000027044	14.7796	-3.01836	0.265918	-11.3507	7.35649e-30	1.84652e-28
ENSCHIG00000011722	14.7675	-2.84241	0.299682	-9.48473	2.43003e-21	3.56028e-20
ENSCHIG00000016007	14.7637	-7.46983	0.610013	-12.2454	1.77897e-34	5.70808e-33
ENSCHIG00000013978	14.757	-2.79282	0.29985	-9.31407	1.23027e-20	1.70817e-19
ENSCHIG00000013738	14.7365	-7.09823	0.561518	-12.6412	1.25203e-36	4.45321e-35
ENSCHIG00000015991	14.7269	-5.20451	0.687009	-7.57561	3.57454e-14	3.10742e-13
ENSCHIG00000026696	14.7161	-3.11138	0.299495	-10.3887	2.78992e-25	5.29388e-24
ENSCHIG00000012062	14.711	4.88219	0.533846	9.14533	5.94501e-20	7.91895e-19
ENSCHIG00000025191	14.6449	-4.23482	0.486729	-8.70056	3.3024e-18	3.91534e-17
ENSCHIG00000015483	14.5906	2.49929	0.225044	11.1058	1.17573e-28	2.69613e-27
ENSCHIG00000021882	14.573	2.62546	0.28147	9.32766	1.08236e-20	1.50908e-19
ENSCHIG00000018570	14.4966	7.20557	0.689446	10.4513	1.44606e-25	2.79143e-24
ENSCHIG00000019030	14.4319	4.40721	0.431028	10.2249	1.53397e-24	2.77227e-23
ENSCHIG00000022086	14.3895	-4.03673	0.323642	-12.4728	1.05044e-35	3.57641e-34
ENSCHIG00000014443	14.3729	3.11894	0.294652	10.5852	3.49103e-26	7.01437e-25
ENSCHIG00000022281	14.3587	7.18896	0.599792	11.9858	4.21933e-33	1.244e-31
ENSCHIG00000021908	14.3175	-6.69227	0.559306	-11.9653	5.39962e-33	1.57531e-31
ENSCHIG00000017844	14.2576	-4.82939	0.442926	-10.9034	1.1104e-27	2.39517e-26
ENSCHIG00000012445	14.21	-2.66259	0.605043	-4.40066	1.07923e-05	3.86245e-05
ENSCHIG00000014517	14.2088	4.38473	0.41881	10.4695	1.19257e-25	2.31817e-24
ENSCHIG00000018254	14.1793	-7.0412	0.632906	-11.1252	9.46054e-29	2.1784e-27
ENSCHIG00000012593	14.1551	2.12348	0.332606	6.38437	1.72107e-10	1.10573e-09
ENSCHIG00000017087	14.1353	-7.40673	0.612171	-12.0991	1.0675e-33	3.25185e-32
ENSCHIG00000002050	14.1203	7.1629	0.587805	12.1858	3.69808e-34	1.15553e-32
ENSCHIG00000023742	14.102	-5.47052	0.534331	-10.2381	1.33887e-24	2.43282e-23
ENSCHIG00000024757	14.1009	-4.56957	0.435003	-10.5047	8.21937e-26	1.61651e-24
ENSCHIG00000003392	13.9764	-7.20797	0.588565	-12.2467	1.74991e-34	5.62561e-33
ENSCHIG00000015160	13.9617	5.39009	0.592699	9.09415	9.53303e-20	1.25483e-18
ENSCHIG00000014342	13.9481	4.34762	0.400603	10.8527	1.93645e-27	4.09768e-26
ENSCHIG00000000607	13.9428	-2.01448	0.442946	-4.54791	5.41812e-06	2.02673e-05
ENSCHIG00000011379	13.8087	2.98119	0.354924	8.39951	4.48332e-17	4.8794e-16
ENSCHIG00000011106	13.7057	-7.36277	0.611591	-12.0387	2.22388e-33	6.66246e-32
ENSCHIG00000026907	13.6637	-2.83848	0.486187	-5.83825	5.27509e-09	2.83911e-08
ENSCHIG00000018690	13.6593	4.63451	0.442192	10.4808	1.05868e-25	2.06752e-24
ENSCHIG00000026522	13.624	-2.10395	0.197781	-10.6377	1.9888e-26	4.04462e-25
ENSCHIG00000019526	13.6043	-2.21963	0.228646	-9.7077	2.79565e-22	4.35959e-21
ENSCHIG00000019407	13.552	-3.62821	0.361888	-10.0258	1.17422e-23	2.0071e-22
ENSCHIG00000013720	13.5415	6.65543	0.593121	11.221	3.21526e-29	7.72263e-28
ENSCHIG00000021591	13.5116	-2.91297	0.313789	-9.28321	1.64446e-20	2.26445e-19
ENSCHIG00000014761	13.4928	-6.60335	0.631132	-10.4627	1.28151e-25	2.47952e-24
ENSCHIG00000012562	13.462	-2.02149	0.336012	-6.01614	1.78631e-09	1.01536e-08
ENSCHIG00000008185	13.4079	2.97816	0.293514	10.1466	3.43228e-24	6.07168e-23
ENSCHIG00000013490	13.3952	3.32468	0.30349	10.9548	6.30119e-28	1.37516e-26
ENSCHIG00000018411	13.3808	-3.39855	0.468256	-7.25789	3.93169e-13	3.16447e-12
ENSCHIG00000020586	13.3727	2.80284	0.267733	10.4688	1.20176e-25	2.33331e-24
ENSCHIG00000019194	13.3718	-2.10853	0.3111	-6.77765	1.22146e-11	8.76361e-11
ENSCHIG00000019688	13.3618	-2.23872	0.503995	-4.44196	8.91444e-06	3.23119e-05
ENSCHIG00000014406	13.356	-4.17546	0.604553	-6.9067	4.96064e-12	3.67422e-11
ENSCHIG00000002290	13.3347	4.29775	0.458335	9.37688	6.79519e-21	9.65945e-20
ENSCHIG00000015129	13.3345	-2.43523	0.253556	-9.60432	7.66651e-22	1.15878e-20
ENSCHIG00000017601	13.2771	-4.13964	0.469761	-8.81221	1.227e-18	1.49285e-17
ENSCHIG00000022628	13.2744	-2.07118	0.241564	-8.57407	9.98913e-18	1.13597e-16
ENSCHIG00000009551	13.2665	-4.82351	0.496036	-9.72412	2.37965e-22	3.71782e-21
ENSCHIG00000003265	13.2413	-6.20809	0.622098	-9.97927	1.87835e-23	3.16536e-22
ENSCHIG00000004467	13.2159	7.07225	0.614638	11.5064	1.22541e-30	3.20081e-29
ENSCHIG00000014887	13.2059	2.39042	0.240331	9.94637	2.61558e-23	4.36374e-22
ENSCHIG00000024836	13.204	-7.12633	0.68091	-10.4659	1.23896e-25	2.39997e-24
ENSCHIG00000011873	13.119	5.49641	0.660764	8.31827	8.92566e-17	9.53421e-16
ENSCHIG00000015005	13.1169	-4.32839	0.497839	-8.69436	3.48788e-18	4.12063e-17
ENSCHIG00000017167	13.0949	-2.8485	0.4733	-6.01839	1.76162e-09	1.00337e-08
ENSCHIG00000018332	13.0896	2.22972	0.224926	9.91309	3.65169e-23	6.03214e-22
ENSCHIG00000025579	13.0874	2.04756	0.23325	8.7784	1.65816e-18	2.00575e-17
ENSCHIG00000011401	13.073	-2.65412	0.290415	-9.13909	6.29829e-20	8.36951e-19
ENSCHIG00000014035	13.0264	2.4042	0.257061	9.35262	8.54991e-21	1.20209e-19
ENSCHIG00000001684	12.9608	-3.04403	0.301685	-10.0901	6.10978e-24	1.06282e-22
ENSCHIG00000012676	12.9488	-2.68146	0.331741	-8.08297	6.32058e-16	6.38436e-15
ENSCHIG00000024631	12.938	-2.23802	0.381721	-5.86296	4.54698e-09	2.46872e-08
ENSCHIG00000013966	12.9102	-2.08896	0.214548	-9.73656	2.10561e-22	3.31134e-21
ENSCHIG00000009991	12.8874	4.44289	0.414553	10.7173	8.44319e-27	1.74038e-25
ENSCHIG00000017532	12.8753	-2.45081	0.302096	-8.11267	4.95201e-16	5.05698e-15
ENSCHIG00000004672	12.8341	-3.74262	0.362816	-10.3155	5.9989e-25	1.123e-23
ENSCHIG00000024211	12.7876	5.08539	0.573492	8.86741	7.48702e-19	9.27115e-18
ENSCHIG00000021633	12.7615	-4.31393	0.567002	-7.60831	2.77701e-14	2.43564e-13
ENSCHIG00000019573	12.7276	-7.25537	0.622692	-11.6516	2.2513e-31	6.1195e-30
ENSCHIG00000026610	12.6984	-5.07906	0.573161	-8.86149	7.89537e-19	9.73354e-18
ENSCHIG00000026152	12.6526	7.00963	0.715328	9.79918	1.13501e-22	1.82266e-21
ENSCHIG00000020752	12.5942	6.77981	0.602922	11.2449	2.45328e-29	5.95232e-28
ENSCHIG00000016346	12.5929	-2.65837	0.285419	-9.31393	1.23191e-20	1.70903e-19
ENSCHIG00000011083	12.5718	-2.50696	0.340465	-7.36335	1.79353e-13	1.48135e-12
ENSCHIG00000023643	12.5098	2.77823	0.273125	10.172	2.64444e-24	4.74326e-23
ENSCHIG00000021277	12.5044	-7.23012	0.67258	-10.7498	5.93731e-27	1.23913e-25
ENSCHIG00000011971	12.4681	-2.23228	0.332547	-6.71267	1.91092e-11	1.34335e-10
ENSCHIG00000006747	12.4567	-2.99165	0.48987	-6.10703	1.01502e-09	5.94745e-09
ENSCHIG00000017266	12.435	-3.8725	0.406351	-9.52993	1.57396e-21	2.32232e-20
ENSCHIG00000012632	12.3972	-2.06747	0.434758	-4.75544	1.98014e-06	7.8422e-06
ENSCHIG00000016053	12.3916	-7.03372	0.631067	-11.1458	7.50957e-29	1.74843e-27
ENSCHIG00000010417	12.3864	-2.5766	0.237222	-10.8615	1.75782e-27	3.73861e-26
ENSCHIG00000015832	12.3226	-2.0639	0.309252	-6.67384	2.49197e-11	1.73576e-10
ENSCHIG00000002557	12.3121	-2.73756	0.252215	-10.8541	1.90673e-27	4.04502e-26
ENSCHIG00000025317	12.2913	4.09828	0.780845	5.24852	1.53328e-07	6.98224e-07
ENSCHIG00000009180	12.2481	-2.1542	0.250352	-8.6047	7.65163e-18	8.76112e-17
ENSCHIG00000013312	12.183	3.98085	0.393938	10.1053	5.23511e-24	9.13842e-23
ENSCHIG00000022853	12.1628	6.94667	0.633151	10.9716	5.23497e-28	1.14997e-26
ENSCHIG00000020739	12.0995	-3.65523	0.327674	-11.1551	6.76333e-29	1.57909e-27
ENSCHIG00000001675	12.0847	-2.52769	0.246651	-10.248	1.20796e-24	2.19733e-23
ENSCHIG00000024199	12.0701	3.04303	0.792079	3.84183	0.00012212	0.000370034
ENSCHIG00000006757	12.0445	6.70978	0.650115	10.3209	5.66895e-25	1.06242e-23
ENSCHIG00000022372	12.032	-4.49203	0.546737	-8.21608	2.1027e-16	2.18736e-15
ENSCHIG00000018164	12.0229	-3.3812	0.614664	-5.5009	3.77858e-08	1.8513e-07
ENSCHIG00000009527	11.9155	-3.43246	0.285913	-12.0053	3.33394e-33	9.91699e-32
ENSCHIG00000011623	11.8765	-4.23672	0.371454	-11.4058	3.91311e-30	9.95669e-29
ENSCHIG00000000812	11.8749	5.78702	0.601289	9.62435	6.31053e-22	9.599e-21
ENSCHIG00000011232	11.8584	-4.83851	0.48627	-9.95027	2.51506e-23	4.20022e-22
ENSCHIG00000016278	11.8557	2.14149	0.35398	6.04975	1.45072e-09	8.37417e-09
ENSCHIG00000022402	11.8469	-3.51404	0.378911	-9.27403	1.7924e-20	2.4635e-19
ENSCHIG00000023377	11.8461	-2.00486	0.5325	-3.76499	0.000166555	0.000493583
ENSCHIG00000004217	11.8256	6.45403	0.62076	10.397	2.55883e-25	4.86643e-24
ENSCHIG00000017371	11.7952	-3.3338	0.298799	-11.1573	6.59348e-29	1.54158e-27
ENSCHIG00000009216	11.7928	2.60005	0.381393	6.81724	9.28056e-12	6.74535e-11
ENSCHIG00000016126	11.7378	-6.40254	0.814102	-7.86455	3.70439e-15	3.52054e-14
ENSCHIG00000022451	11.6764	3.60527	0.346529	10.404	2.37851e-25	4.53381e-24
ENSCHIG00000016980	11.6584	2.09295	0.507764	4.12189	3.7578e-05	0.000123684
ENSCHIG00000012961	11.6178	-4.35398	0.399752	-10.8917	1.26245e-27	2.71613e-26
ENSCHIG00000017178	11.6177	3.39777	0.524423	6.47905	9.23005e-11	6.10117e-10
ENSCHIG00000012064	11.6006	2.92548	0.741644	3.94459	7.99373e-05	0.000249778
ENSCHIG00000014021	11.589	-2.02687	0.232611	-8.71356	2.94486e-18	3.51136e-17
ENSCHIG00000023913	11.5476	-7.11475	0.67602	-10.5245	6.66383e-26	1.31833e-24
ENSCHIG00000023080	11.5466	-3.34253	0.373395	-8.95174	3.49915e-19	4.44832e-18
ENSCHIG00000011093	11.5007	-3.81701	0.532844	-7.16348	7.86557e-13	6.19353e-12
ENSCHIG00000024398	11.4981	2.26072	0.316619	7.14019	9.32012e-13	7.30447e-12
ENSCHIG00000025500	11.494	-2.11709	0.231943	-9.12764	7.00061e-20	9.27331e-19
ENSCHIG00000020875	11.4804	3.134	0.374368	8.37145	5.69145e-17	6.14228e-16
ENSCHIG00000009573	11.4593	-2.44962	0.233907	-10.4726	1.15408e-25	2.24857e-24
ENSCHIG00000019733	11.4582	3.01228	0.479147	6.28677	3.24139e-10	2.02566e-09
ENSCHIG00000010061	11.4313	2.29732	0.460316	4.99074	6.01493e-07	2.5296e-06
ENSCHIG00000018863	11.4289	2.31452	0.475125	4.8714	1.10813e-06	4.51819e-06
ENSCHIG00000022109	11.3847	-2.90949	0.27537	-10.5658	4.29514e-26	8.61967e-25
ENSCHIG00000017486	11.3567	2.53975	0.330305	7.68909	1.48185e-14	1.32898e-13
ENSCHIG00000022211	11.3335	-6.90364	0.663497	-10.4049	2.35437e-25	4.49293e-24
ENSCHIG00000018046	11.0683	-7.0543	0.601802	-11.722	9.83607e-32	2.71336e-30
ENSCHIG00000011959	11.0463	6.81329	0.958301	7.10976	1.16241e-12	9.01007e-12
ENSCHIG00000012989	10.9811	6.80323	0.791852	8.59154	8.58107e-18	9.79848e-17
ENSCHIG00000004432	10.9758	-2.93418	0.306636	-9.56893	1.08014e-21	1.60361e-20
ENSCHIG00000000129	10.9547	2.60669	0.345747	7.5393	4.72496e-14	4.0736e-13
ENSCHIG00000001864	10.9457	-6.85426	0.632806	-10.8315	2.44057e-27	5.1514e-26
ENSCHIG00000025019	10.9146	3.37849	0.381829	8.84817	8.89635e-19	1.09353e-17
ENSCHIG00000014360	10.871	-2.40697	0.292526	-8.22824	1.8999e-16	1.98504e-15
ENSCHIG00000024441	10.8703	2.96174	0.365525	8.10272	5.37456e-16	5.46845e-15
ENSCHIG00000011221	10.8508	-3.38415	0.358799	-9.43187	4.0283e-21	5.81529e-20
ENSCHIG00000026364	10.8173	2.22273	0.247961	8.96404	3.12986e-19	3.99708e-18
ENSCHIG00000024406	10.8109	6.78105	0.694364	9.76583	1.57815e-22	2.51017e-21
ENSCHIG00000015662	10.796	-2.18055	0.223211	-9.76903	1.52904e-22	2.43671e-21
ENSCHIG00000023813	10.7547	2.30638	0.27295	8.44984	2.91698e-17	3.21869e-16
ENSCHIG00000021318	10.6409	-3.03557	0.37505	-8.09378	5.78389e-16	5.86707e-15
ENSCHIG00000021631	10.6228	-6.99244	0.644705	-10.846	2.08429e-27	4.40495e-26
ENSCHIG00000010349	10.6103	-4.30089	0.471805	-9.11582	7.80785e-20	1.02937e-18
ENSCHIG00000026349	10.5989	-2.39544	0.295743	-8.09973	5.50793e-16	5.59733e-15
ENSCHIG00000015133	10.5741	2.09264	0.343487	6.09233	1.11279e-09	6.49758e-09
ENSCHIG00000019683	10.5642	6.52332	0.78135	8.34878	6.89701e-17	7.41462e-16
ENSCHIG00000018076	10.5268	-3.72517	0.511112	-7.28836	3.13744e-13	2.54728e-12
ENSCHIG00000026921	10.4825	3.67784	0.430857	8.53611	1.38814e-17	1.56161e-16
ENSCHIG00000022910	10.4741	-4.26613	0.379695	-11.2357	2.72376e-29	6.59899e-28
ENSCHIG00000020454	10.4586	-4.64927	0.494656	-9.39901	5.50773e-21	7.87619e-20
ENSCHIG00000011772	10.4543	-6.9717	0.667637	-10.4424	1.58827e-25	3.05889e-24
ENSCHIG00000010320	10.4335	2.93419	0.500354	5.86423	4.51234e-09	2.45071e-08
ENSCHIG00000013445	10.4302	-2.28878	0.402259	-5.68983	1.27167e-08	6.57954e-08
ENSCHIG00000014957	10.3163	-3.94391	0.395547	-9.97078	2.04625e-23	3.4379e-22
ENSCHIG00000020828	10.2902	2.16531	0.504087	4.2955	1.743e-05	6.03392e-05
ENSCHIG00000008729	10.2354	-2.5771	0.381419	-6.75661	1.41258e-11	1.00855e-10
ENSCHIG00000012922	10.2184	-3.35279	0.367035	-9.1348	6.55272e-20	8.6938e-19
ENSCHIG00000022069	10.1111	6.68472	0.642164	10.4097	2.23982e-25	4.27922e-24
ENSCHIG00000026071	10.0902	-3.6419	0.339332	-10.7325	7.15996e-27	1.48503e-25
ENSCHIG00000016304	10.0858	-2.13425	0.408667	-5.22247	1.76552e-07	7.98114e-07
ENSCHIG00000017967	10.0712	-2.70522	0.301946	-8.9593	3.26739e-19	4.16636e-18
ENSCHIG00000013693	10.0586	-3.7104	0.364955	-10.1667	2.7911e-24	4.97961e-23
ENSCHIG00000019553	10.0269	-4.20853	0.398501	-10.5609	4.52321e-26	9.06649e-25
ENSCHIG00000016493	10.0096	2.94435	0.577216	5.10095	3.3796e-07	1.4755e-06
ENSCHIG00000004964	10.0012	6.66927	0.674714	9.88459	4.85585e-23	7.95057e-22
ENSCHIG00000015847	9.9895	2.23629	0.382085	5.85285	4.83225e-09	2.6168e-08
ENSCHIG00000020106	9.97909	-2.89346	0.275407	-10.5061	8.0938e-26	1.59369e-24
ENSCHIG00000017748	9.97389	2.28163	0.255195	8.94074	3.86567e-19	4.88823e-18
ENSCHIG00000025660	9.95679	5.75419	0.632877	9.09211	9.71322e-20	1.27754e-18
ENSCHIG00000022161	9.95267	-2.41231	0.259641	-9.29094	1.52936e-20	2.11641e-19
ENSCHIG00000015303	9.85695	2.62576	0.483294	5.43306	5.53957e-08	2.65648e-07
ENSCHIG00000018743	9.81081	-2.37706	0.307582	-7.72823	1.09051e-14	9.87856e-14
ENSCHIG00000021903	9.80689	2.25993	0.271027	8.3384	7.53045e-17	8.08001e-16
ENSCHIG00000024999	9.79627	-6.87993	0.648604	-10.6073	2.75621e-26	5.56468e-25
ENSCHIG00000025860	9.70917	-3.43061	0.428715	-8.00208	1.22336e-15	1.21011e-14
ENSCHIG00000017030	9.70671	3.20448	0.500348	6.4045	1.50866e-10	9.74509e-10
ENSCHIG00000020191	9.70596	-6.67994	0.680944	-9.80982	1.02148e-22	1.64668e-21
ENSCHIG00000013626	9.6922	6.62182	0.625331	10.5893	3.34057e-26	6.72014e-25
ENSCHIG00000024533	9.65619	-2.85434	0.370242	-7.70938	1.26426e-14	1.14056e-13
ENSCHIG00000021567	9.63875	3.52653	0.36265	9.72433	2.37468e-22	3.71352e-21
ENSCHIG00000017082	9.59758	-2.40828	0.261229	-9.21903	2.99798e-20	4.07244e-19
ENSCHIG00000014608	9.58081	-3.28281	0.406133	-8.08309	6.31451e-16	6.38208e-15
ENSCHIG00000008950	9.57469	-2.45035	0.279452	-8.76841	1.81215e-18	2.18254e-17
ENSCHIG00000022144	9.57058	2.57405	0.443509	5.80383	6.48152e-09	3.45619e-08
ENSCHIG00000017842	9.56242	-4.88989	0.481441	-10.1568	3.09129e-24	5.48008e-23
ENSCHIG00000026701	9.56117	-2.55391	0.465046	-5.49173	3.98014e-08	1.94606e-07
ENSCHIG00000024837	9.52337	-3.11455	0.359892	-8.65413	4.9668e-18	5.78607e-17
ENSCHIG00000006553	9.51602	4.49141	0.497037	9.03638	1.61942e-19	2.10349e-18
ENSCHIG00000014179	9.5089	-4.62841	0.455049	-10.1712	2.66502e-24	4.76993e-23
ENSCHIG00000022959	9.46942	-6.83032	0.609095	-11.2139	3.48586e-29	8.34858e-28
ENSCHIG00000025393	9.45829	-2.40753	0.292599	-8.22809	1.90226e-16	1.98627e-15
ENSCHIG00000015840	9.45666	2.53174	0.286276	8.84369	9.26051e-19	1.13746e-17
ENSCHIG00000025296	9.45596	2.86143	0.403659	7.08873	1.35344e-12	1.04554e-11
ENSCHIG00000021598	9.43094	3.00607	0.321514	9.34974	8.78615e-21	1.23427e-19
ENSCHIG00000023314	9.42082	5.67024	0.608416	9.31968	1.1669e-20	1.62423e-19
ENSCHIG00000017723	9.40564	-2.48632	0.316694	-7.85086	4.13201e-15	3.90032e-14
ENSCHIG00000020304	9.40512	2.1168	0.352177	6.01062	1.84811e-09	1.0487e-08
ENSCHIG00000025099	9.35499	2.20432	0.310535	7.09846	1.26155e-12	9.76357e-12
ENSCHIG00000021733	9.34167	-2.24307	0.491403	-4.56462	5.00402e-06	1.87982e-05
ENSCHIG00000012814	9.33262	2.17403	0.352427	6.16874	6.88378e-10	4.11574e-09
ENSCHIG00000003495	9.27196	-2.05261	0.271052	-7.57275	3.65412e-14	3.17165e-13
ENSCHIG00000026254	9.27081	-6.61171	0.686977	-9.62435	6.31048e-22	9.599e-21
ENSCHIG00000011783	9.24988	2.17029	0.444099	4.88694	1.02414e-06	4.19314e-06
ENSCHIG00000012775	9.24106	-3.63557	0.370258	-9.81902	9.32488e-23	1.50904e-21
ENSCHIG00000012160	9.23797	-3.02176	0.309335	-9.76857	1.53606e-22	2.44556e-21
ENSCHIG00000020183	9.21595	-5.48424	0.574632	-9.54393	1.37521e-21	2.03988e-20
ENSCHIG00000000483	9.20593	2.97055	0.37405	7.94157	1.99637e-15	1.94257e-14
ENSCHIG00000006565	9.13693	2.64106	0.667006	3.95958	7.50825e-05	0.000235798
ENSCHIG00000015334	9.12172	-4.11756	0.960412	-4.28728	1.80873e-05	6.24721e-05
ENSCHIG00000018141	9.09324	-4.56445	0.481747	-9.47478	2.67312e-21	3.90958e-20
ENSCHIG00000005629	9.04034	-2.65616	0.518608	-5.12171	3.02772e-07	1.32707e-06
ENSCHIG00000007017	8.99897	-2.43896	0.687443	-3.54787	0.000388355	0.0010804
ENSCHIG00000023182	8.99518	3.42686	0.369122	9.2838	1.63543e-20	2.25388e-19
ENSCHIG00000016909	8.97508	3.35443	0.406664	8.24864	1.60201e-16	1.67799e-15
ENSCHIG00000021212	8.9585	2.46589	0.421691	5.84762	4.98653e-09	2.69598e-08
ENSCHIG00000010451	8.94582	-3.40377	0.394858	-8.62025	6.68104e-18	7.69194e-17
ENSCHIG00000014310	8.93797	-2.21376	0.237316	-9.32833	1.07557e-20	1.50085e-19
ENSCHIG00000012744	8.9305	2.06975	0.279527	7.40448	1.31669e-13	1.09563e-12
ENSCHIG00000018483	8.89509	3.04643	0.434116	7.01754	2.25812e-12	1.71197e-11
ENSCHIG00000025207	8.89315	-3.05013	0.325825	-9.36128	7.87778e-21	1.11133e-19
ENSCHIG00000000233	8.86841	3.47646	0.400735	8.67521	4.12796e-18	4.8426e-17
ENSCHIG00000019738	8.78881	-6.72266	0.844974	-7.95606	1.77605e-15	1.73932e-14
ENSCHIG00000025001	8.77957	-3.6171	0.377705	-9.57654	1.00355e-21	1.49521e-20
ENSCHIG00000013313	8.76129	-6.71864	0.837956	-8.01789	1.07575e-15	1.06663e-14
ENSCHIG00000025205	8.74841	-6.52984	0.732492	-8.91456	4.89771e-19	6.14217e-18
ENSCHIG00000016563	8.68383	-2.64292	0.392948	-6.72588	1.74536e-11	1.23475e-10
ENSCHIG00000007661	8.65638	4.34691	0.490281	8.86618	7.57004e-19	9.35317e-18
ENSCHIG00000025821	8.64549	2.16962	0.296247	7.32369	2.4125e-13	1.97115e-12
ENSCHIG00000026186	8.62916	-2.51947	0.345666	-7.28873	3.12889e-13	2.54157e-12
ENSCHIG00000014611	8.62685	3.44714	0.42744	8.06463	7.34556e-16	7.38399e-15
ENSCHIG00000017833	8.59637	-2.6156	0.322733	-8.10452	5.29559e-16	5.39137e-15
ENSCHIG00000021947	8.59529	-3.32928	0.341457	-9.75022	1.84074e-22	2.90847e-21
ENSCHIG00000023147	8.59267	-4.4696	0.451208	-9.90584	3.92674e-23	6.46732e-22
ENSCHIG00000019478	8.58984	2.11429	0.281884	7.50057	6.35424e-14	5.43623e-13
ENSCHIG00000020565	8.58598	-6.50248	1.85717	-3.50128	0.000463023	0.00127371
ENSCHIG00000012089	8.54124	-6.68025	0.63323	-10.5495	5.107e-26	1.01635e-24
ENSCHIG00000022648	8.53568	2.41676	0.440957	5.4807	4.23635e-08	2.06229e-07
ENSCHIG00000026145	8.52173	-2.53303	0.300529	-8.42857	3.49926e-17	3.82834e-16
ENSCHIG00000024048	8.51384	-2.57336	0.340042	-7.56778	3.79644e-14	3.29005e-13
ENSCHIG00000023351	8.48394	-3.30889	0.371594	-8.90459	5.35833e-19	6.70474e-18
ENSCHIG00000015717	8.48296	-3.44302	0.40126	-8.58053	9.4433e-18	1.0761e-16
ENSCHIG00000000423	8.47512	-6.66998	0.707252	-9.43084	4.0681e-21	5.86263e-20
ENSCHIG00000016983	8.42061	2.37581	0.314183	7.56186	3.97337e-14	3.43626e-13
ENSCHIG00000011776	8.38455	3.32328	0.405006	8.20551	2.29618e-16	2.38121e-15
ENSCHIG00000014973	8.3514	-5.3442	0.553933	-9.64773	5.02543e-22	7.72152e-21
ENSCHIG00000026094	8.33266	2.37306	0.335376	7.0758	1.48588e-12	1.14309e-11
ENSCHIG00000019978	8.3191	-2.59392	0.354462	-7.31791	2.51866e-13	2.05588e-12
ENSCHIG00000026650	8.23566	-2.19311	0.40488	-5.41669	6.07139e-08	2.9007e-07
ENSCHIG00000020147	8.19963	2.49591	0.364728	6.84321	7.74383e-12	5.66537e-11
ENSCHIG00000023900	8.12593	3.63327	0.475997	7.63297	2.29404e-14	2.02586e-13
ENSCHIG00000012464	8.12324	-3.50935	0.334177	-10.5015	8.50438e-26	1.6706e-24
ENSCHIG00000025323	8.10817	-2.53369	0.338306	-7.48932	6.92295e-14	5.89261e-13
ENSCHIG00000015580	8.1043	3.43559	0.439639	7.81458	5.51474e-15	5.13879e-14
ENSCHIG00000018583	8.08837	2.18024	0.303013	7.1952	6.23672e-13	4.96237e-12
ENSCHIG00000013887	8.07922	2.11942	0.440417	4.81231	1.49194e-06	5.99539e-06
ENSCHIG00000011015	8.06448	3.70976	0.418909	8.85577	8.31107e-19	1.02309e-17
ENSCHIG00000013604	8.06148	-6.59729	0.628414	-10.4983	8.79277e-26	1.7232e-24
ENSCHIG00000025971	8.06126	-6.03034	0.582597	-10.3508	4.15054e-25	7.83122e-24
ENSCHIG00000015502	7.99753	-2.03481	0.259749	-7.83374	4.73573e-15	4.43762e-14
ENSCHIG00000024423	7.97747	-2.77195	0.467882	-5.92447	3.13313e-09	1.73145e-08
ENSCHIG00000008305	7.95655	2.82029	0.392852	7.179	7.02227e-13	5.55304e-12
ENSCHIG00000026472	7.88553	-3.11083	0.401869	-7.74092	9.87011e-15	8.99175e-14
ENSCHIG00000024276	7.86212	2.52563	0.535126	4.71968	2.36217e-06	9.25002e-06
ENSCHIG00000009966	7.85689	-3.02348	0.536219	-5.63852	1.71522e-08	8.73542e-08
ENSCHIG00000025712	7.8402	-6.5585	0.705965	-9.29012	1.54109e-20	2.13088e-19
ENSCHIG00000025687	7.79012	2.23226	0.710171	3.14327	0.00167073	0.00415248
ENSCHIG00000015374	7.74951	-3.80905	0.712433	-5.34654	8.96514e-08	4.191e-07
ENSCHIG00000020981	7.71234	-3.54456	0.40882	-8.67021	4.31322e-18	5.04577e-17
ENSCHIG00000021133	7.65424	6.27913	0.636789	9.86061	6.16722e-23	1.00485e-21
ENSCHIG00000009979	7.65062	-6.5219	1.16259	-5.60983	2.02528e-08	1.02163e-07
ENSCHIG00000011517	7.64062	2.41063	0.417449	5.77467	7.71052e-09	4.0803e-08
ENSCHIG00000007974	7.62304	-2.09385	0.531545	-3.93918	8.17621e-05	0.000254956
ENSCHIG00000018183	7.61244	2.42068	0.933991	2.59176	0.00954857	0.0202183
ENSCHIG00000013828	7.60889	2.03524	0.300541	6.77191	1.27097e-11	9.10321e-11
ENSCHIG00000009210	7.60675	2.93313	0.373265	7.85803	3.90225e-15	3.69388e-14
ENSCHIG00000026070	7.58226	-2.6611	0.500012	-5.32207	1.02592e-07	4.76664e-07
ENSCHIG00000018744	7.53144	-3.31423	0.350661	-9.45137	3.3443e-21	4.853e-20
ENSCHIG00000018892	7.52335	-3.3074	0.35687	-9.26781	1.90016e-20	2.60582e-19
ENSCHIG00000000400	7.47857	-2.48633	0.494163	-5.0314	4.86916e-07	2.07225e-06
ENSCHIG00000011592	7.45104	-3.29238	0.363956	-9.04609	1.48173e-19	1.92613e-18
ENSCHIG00000011236	7.44131	-5.36332	0.604981	-8.86527	7.63203e-19	9.42279e-18
ENSCHIG00000014606	7.42342	-5.91753	0.855239	-6.91915	4.54369e-12	3.37286e-11
ENSCHIG00000007330	7.41755	-6.48109	0.730744	-8.86916	7.37001e-19	9.13979e-18
ENSCHIG00000018568	7.41277	2.74653	0.3655	7.51445	5.71524e-14	4.90461e-13
ENSCHIG00000021383	7.40605	2.75478	0.350243	7.86535	3.68061e-15	3.50257e-14
ENSCHIG00000026796	7.38015	2.32491	0.2936	7.91862	2.40169e-15	2.3221e-14
ENSCHIG00000020433	7.3588	3.04208	0.443169	6.86438	6.67799e-12	4.91572e-11
ENSCHIG00000019315	7.35824	3.02559	0.37408	8.0881	6.06032e-16	6.1363e-15
ENSCHIG00000022129	7.3545	-6.281	0.583881	-10.7573	5.47379e-27	1.14382e-25
ENSCHIG00000020048	7.33389	2.66987	0.33262	8.02679	1.00056e-15	9.93845e-15
ENSCHIG00000025614	7.32142	-2.73892	0.356464	-7.68359	1.5469e-14	1.38361e-13
ENSCHIG00000024543	7.32047	4.2585	0.526705	8.08518	6.20722e-16	6.27744e-15
ENSCHIG00000020939	7.29686	-3.18523	0.468294	-6.80177	1.03339e-11	7.46228e-11
ENSCHIG00000016430	7.27473	-4.00432	0.417414	-9.59316	8.54268e-22	1.28194e-20
ENSCHIG00000017961	7.24872	4.40555	0.535651	8.22466	1.95749e-16	2.04266e-15
ENSCHIG00000017104	7.20976	3.00038	0.474564	6.3224	2.57535e-10	1.62461e-09
ENSCHIG00000011804	7.19792	-3.05373	0.597317	-5.11241	3.18066e-07	1.39155e-06
ENSCHIG00000018287	7.19325	2.41543	0.422095	5.72247	1.04984e-08	5.46395e-08
ENSCHIG00000014508	7.16397	6.18265	0.652474	9.47571	2.64952e-21	3.87845e-20
ENSCHIG00000017650	7.12138	-3.37409	0.442989	-7.61665	2.60341e-14	2.29059e-13
ENSCHIG00000020104	7.10174	-2.19808	0.49905	-4.40452	1.06018e-05	3.79915e-05
ENSCHIG00000021041	7.09507	3.36445	0.611719	5.49999	3.79802e-08	1.85974e-07
ENSCHIG00000024469	7.05443	3.07964	0.500067	6.15846	7.34542e-10	4.37766e-09
ENSCHIG00000016344	7.04046	-2.92991	0.347223	-8.4381	3.22533e-17	3.53791e-16
ENSCHIG00000014071	7.03938	-2.52249	0.347495	-7.25908	3.89739e-13	3.13837e-12
ENSCHIG00000017352	7.02162	-3.65625	0.47574	-7.6854	1.52519e-14	1.36638e-13
ENSCHIG00000009670	7.01806	-4.31186	0.702981	-6.13367	8.58734e-10	5.07081e-09
ENSCHIG00000007401	7.01711	-3.35462	0.555091	-6.04337	1.50931e-09	8.69741e-09
ENSCHIG00000014816	7.0167	-6.39569	0.567434	-11.2713	1.81966e-29	4.4603e-28
ENSCHIG00000016095	6.99247	-6.20367	0.653732	-9.48961	2.3189e-21	3.40044e-20
ENSCHIG00000022003	6.98986	-2.0537	0.457046	-4.49342	7.00887e-06	2.58135e-05
ENSCHIG00000011120	6.98485	-2.93702	0.35522	-8.26816	1.36043e-16	1.43123e-15
ENSCHIG00000019075	6.92431	-6.37945	0.642667	-9.92652	3.19192e-23	5.27787e-22
ENSCHIG00000023150	6.9051	-2.54597	0.294331	-8.65003	5.14881e-18	5.98558e-17
ENSCHIG00000021773	6.89244	4.55218	0.663109	6.86491	6.65329e-12	4.8997e-11
ENSCHIG00000024374	6.89033	6.13179	0.804291	7.62384	2.4624e-14	2.17224e-13
ENSCHIG00000000135	6.87829	-2.27944	0.427368	-5.33367	9.62475e-08	4.48431e-07
ENSCHIG00000012403	6.87727	-2.58816	0.425078	-6.08868	1.13848e-09	6.64058e-09
ENSCHIG00000013892	6.8537	2.83828	0.390873	7.26139	3.83129e-13	3.08961e-12
ENSCHIG00000023217	6.85	-6.36156	0.615322	-10.3386	4.71437e-25	8.87502e-24
ENSCHIG00000024912	6.83598	-4.24739	0.460219	-9.22906	2.73012e-20	3.71657e-19
ENSCHIG00000014378	6.83069	2.55761	0.374031	6.83796	8.03309e-12	5.86415e-11
ENSCHIG00000017911	6.79846	-2.37202	0.426989	-5.55523	2.77249e-08	1.37857e-07
ENSCHIG00000021480	6.79518	-2.13863	0.453644	-4.71433	2.42504e-06	9.48069e-06
ENSCHIG00000024146	6.78407	4.51447	0.575753	7.84098	4.47031e-15	4.19833e-14
ENSCHIG00000013630	6.78157	-2.15944	0.540719	-3.99364	6.50654e-05	0.000206434
ENSCHIG00000010818	6.77799	2.22748	0.319643	6.96865	3.20001e-12	2.39349e-11
ENSCHIG00000026857	6.75196	-6.34004	0.650121	-9.75209	1.80707e-22	2.85797e-21
ENSCHIG00000020122	6.74839	5.86898	0.677147	8.66722	4.42816e-18	5.17661e-17
ENSCHIG00000015292	6.74092	2.59597	0.330566	7.85312	4.0581e-15	3.83489e-14
ENSCHIG00000026955	6.7263	-4.83286	0.572453	-8.44238	3.10942e-17	3.422e-16
ENSCHIG00000010667	6.66211	-4.52186	0.897893	-5.03608	4.75163e-07	2.0279e-06
ENSCHIG00000019769	6.657	4.28368	0.551832	7.76264	8.31771e-15	7.63157e-14
ENSCHIG00000002319	6.64087	-5.1903	0.617307	-8.40797	4.17154e-17	4.546e-16
ENSCHIG00000012330	6.60082	2.72219	0.583099	4.66849	3.03419e-06	1.1725e-05
ENSCHIG00000009672	6.59707	2.12733	0.37063	5.73977	9.4803e-09	4.95877e-08
ENSCHIG00000024879	6.59667	6.0699	0.84406	7.19131	6.41703e-13	5.09371e-12
ENSCHIG00000015667	6.59395	6.06585	0.633328	9.57774	9.91929e-22	1.48054e-20
ENSCHIG00000023218	6.56802	6.06424	0.753661	8.04637	8.5284e-16	8.5422e-15
ENSCHIG00000024882	6.55889	-6.30242	0.671377	-9.38731	6.15549e-21	8.77998e-20
ENSCHIG00000019088	6.5553	6.06444	0.663738	9.13679	6.4334e-20	8.54226e-19
ENSCHIG00000011935	6.53179	5.59076	0.596993	9.36487	7.61419e-21	1.07687e-19
ENSCHIG00000009900	6.52194	6.04717	0.655134	9.23042	2.69563e-20	3.67261e-19
ENSCHIG00000011067	6.51397	5.1279	0.648667	7.90529	2.67303e-15	2.56958e-14
ENSCHIG00000013224	6.49332	-4.45377	0.512519	-8.68996	3.62573e-18	4.28046e-17
ENSCHIG00000002095	6.45704	5.34143	0.619424	8.62323	6.50933e-18	7.50458e-17
ENSCHIG00000010678	6.44472	-3.80426	0.453395	-8.39059	4.83709e-17	5.24395e-16
ENSCHIG00000011689	6.44237	-2.7939	0.481971	-5.79682	6.75856e-09	3.5936e-08
ENSCHIG00000012202	6.44123	-4.95737	0.640942	-7.7345	1.03808e-14	9.42613e-14
ENSCHIG00000016589	6.43526	-4.45767	0.833711	-5.34678	8.95339e-08	4.18668e-07
ENSCHIG00000022335	6.43156	2.14718	0.333855	6.43146	1.26387e-10	8.23385e-10
ENSCHIG00000026456	6.42934	-2.61921	0.320385	-8.17518	2.95429e-16	3.05045e-15
ENSCHIG00000011491	6.41879	-4.95017	0.554459	-8.92793	4.34047e-19	5.46383e-18
ENSCHIG00000014002	6.4177	2.15453	0.339373	6.34857	2.17329e-10	1.38147e-09
ENSCHIG00000025127	6.40795	-2.18345	0.492378	-4.43449	9.22894e-06	3.33579e-05
ENSCHIG00000014675	6.37369	3.59872	0.449331	8.00905	1.15594e-15	1.14478e-14
ENSCHIG00000001671	6.3532	-4.03405	0.733371	-5.5007	3.78284e-08	1.85285e-07
ENSCHIG00000024279	6.34046	2.926	0.490342	5.96725	2.41286e-09	1.34632e-08
ENSCHIG00000021410	6.32443	-5.87044	0.751432	-7.81234	5.6136e-15	5.21928e-14
ENSCHIG00000020344	6.31445	-2.23774	0.424657	-5.26952	1.3678e-07	6.27829e-07
ENSCHIG00000016664	6.28164	-6.23618	1.24347	-5.01513	5.29978e-07	2.24693e-06
ENSCHIG00000011667	6.27482	5.53132	0.751571	7.35968	1.84356e-13	1.51967e-12
ENSCHIG00000015611	6.25982	-5.86162	0.561839	-10.4329	1.75415e-25	3.37058e-24
ENSCHIG00000020411	6.21362	-6.22265	0.571103	-10.8959	1.20626e-27	2.5986e-26
ENSCHIG00000018636	6.19064	-2.60752	0.310516	-8.39739	4.56529e-17	4.96538e-16
ENSCHIG00000017026	6.17471	-2.19052	0.443264	-4.94179	7.74075e-07	3.21336e-06
ENSCHIG00000013329	6.16791	-3.95535	0.567575	-6.96886	3.19517e-12	2.39094e-11
ENSCHIG00000020738	6.16107	-4.69674	0.5707	-8.22978	1.8756e-16	1.9621e-15
ENSCHIG00000011825	6.13145	-2.46334	0.345391	-7.13201	9.89134e-13	7.73041e-12
ENSCHIG00000012833	6.11617	2.31498	0.369871	6.25888	3.8775e-10	2.40609e-09
ENSCHIG00000016166	6.09956	-5.06337	0.787108	-6.43288	1.2521e-10	8.16674e-10
ENSCHIG00000019158	6.09772	2.2875	0.376024	6.08337	1.17681e-09	6.85703e-09
ENSCHIG00000021512	6.09465	5.48908	0.607927	9.02916	1.7299e-19	2.24176e-18
ENSCHIG00000023122	6.07911	5.71811	0.634165	9.01675	1.93746e-19	2.50105e-18
ENSCHIG00000006150	6.0755	-3.61621	0.577997	-6.25646	3.93811e-10	2.44099e-09
ENSCHIG00000011014	6.06444	5.94849	0.664781	8.94804	3.6184e-19	4.59292e-18
ENSCHIG00000026999	6.04337	-2.43702	0.360967	-6.75135	1.46476e-11	1.04242e-10
ENSCHIG00000002547	6.0274	3.65762	0.474812	7.7033	1.32593e-14	1.19298e-13
ENSCHIG00000018002	6.01109	-6.17033	0.690837	-8.93168	4.19573e-19	5.2896e-18
ENSCHIG00000022494	6.00079	-6.17229	0.779201	-7.9213	2.35036e-15	2.27642e-14
ENSCHIG00000016350	5.99662	2.86979	0.386952	7.4164	1.20345e-13	1.0054e-12
ENSCHIG00000025390	5.977	3.63286	0.463495	7.83796	4.57914e-15	4.29571e-14
ENSCHIG00000013563	5.96018	-2.51403	0.635819	-3.954	7.68561e-05	0.00024087
ENSCHIG00000018450	5.95642	-4.02377	0.5494	-7.32392	2.40827e-13	1.96866e-12
ENSCHIG00000014514	5.9392	-3.38192	0.444667	-7.6055	2.83794e-14	2.48778e-13
ENSCHIG00000025918	5.93855	-6.15249	0.668001	-9.2103	3.25228e-20	4.40943e-19
ENSCHIG00000018106	5.93289	3.16578	0.580305	5.45537	4.88701e-08	2.35911e-07
ENSCHIG00000014964	5.9148	-2.67691	0.475199	-5.63323	1.76862e-08	8.98389e-08
ENSCHIG00000015630	5.91395	-2.31208	0.305932	-7.5575	4.10887e-14	3.5516e-13
ENSCHIG00000002685	5.9107	-2.25177	0.348193	-6.46703	9.99495e-11	6.57817e-10
ENSCHIG00000025664	5.87465	2.18437	0.352964	6.18865	6.06815e-10	3.67541e-09
ENSCHIG00000022221	5.86257	-4.29168	0.544924	-7.87574	3.38732e-15	3.23391e-14
ENSCHIG00000018610	5.85815	5.89935	0.700521	8.42138	3.72069e-17	4.06794e-16
ENSCHIG00000014871	5.84848	-3.06104	0.478772	-6.39351	1.62117e-10	1.04476e-09
ENSCHIG00000023444	5.83749	-4.27942	0.562387	-7.60938	2.75406e-14	2.41678e-13
ENSCHIG00000021493	5.83713	-6.13305	0.738628	-8.3033	1.01258e-16	1.07886e-15
ENSCHIG00000007920	5.82751	3.59679	0.479709	7.49786	6.48657e-14	5.5381e-13
ENSCHIG00000022787	5.82721	2.49739	0.399656	6.24884	4.13524e-10	2.55465e-09
ENSCHIG00000015264	5.82577	2.20554	0.329928	6.68491	2.31066e-11	1.61485e-10
ENSCHIG00000025469	5.81994	2.92592	0.520467	5.62171	1.89074e-08	9.56934e-08
ENSCHIG00000012488	5.80814	-6.1213	0.634851	-9.6421	5.30916e-22	8.12014e-21
ENSCHIG00000020069	5.77573	5.64911	0.602957	9.369	7.32208e-21	1.03644e-19
ENSCHIG00000008403	5.76927	-2.41408	0.477061	-5.06032	4.18546e-07	1.80191e-06
ENSCHIG00000008260	5.75932	2.43214	0.389132	6.25017	4.10009e-10	2.53574e-09
ENSCHIG00000016734	5.7432	-5.35558	0.594428	-9.00964	2.06731e-19	2.66661e-18
ENSCHIG00000020287	5.73395	2.80842	0.442797	6.34245	2.26133e-10	1.43355e-09
ENSCHIG00000021901	5.72737	2.71782	0.410046	6.62808	3.40081e-11	2.35214e-10
ENSCHIG00000011711	5.72609	-6.1022	0.951361	-6.41418	1.41579e-10	9.17354e-10
ENSCHIG00000026173	5.71678	-2.97698	0.557464	-5.34022	9.2833e-08	4.33246e-07
ENSCHIG00000026909	5.71161	-4.58842	0.747285	-6.14011	8.24628e-10	4.88668e-09
ENSCHIG00000023746	5.68599	5.84919	0.63071	9.27397	1.79343e-20	2.4635e-19
ENSCHIG00000013995	5.66303	-3.59113	0.438643	-8.18692	2.67992e-16	2.77401e-15
ENSCHIG00000025003	5.66259	-4.94886	0.589378	-8.39676	4.58972e-17	4.98871e-16
ENSCHIG00000012021	5.6621	-3.13384	0.379096	-8.26661	1.3782e-16	1.44811e-15
ENSCHIG00000017259	5.64042	2.78456	0.523208	5.32209	1.02582e-07	4.76664e-07
ENSCHIG00000010864	5.63922	3.6854	0.517602	7.12013	1.07826e-12	8.39163e-12
ENSCHIG00000022670	5.6018	-6.07077	0.956244	-6.34856	2.17339e-10	1.38147e-09
ENSCHIG00000021925	5.52723	3.37467	0.454305	7.42821	1.10077e-13	9.22383e-13
ENSCHIG00000020920	5.51527	2.32933	0.349593	6.66298	2.68339e-11	1.86754e-10
ENSCHIG00000010429	5.51057	-2.4447	0.396091	-6.17207	6.74033e-10	4.03575e-09
ENSCHIG00000010944	5.50726	-2.51589	0.380932	-6.60455	3.98727e-11	2.73514e-10
ENSCHIG00000005257	5.48623	-2.4729	0.728995	-3.3922	0.00069335	0.00184831
ENSCHIG00000021500	5.48527	3.13631	0.456917	6.86408	6.69217e-12	4.92398e-11
ENSCHIG00000011408	5.46695	-6.03753	0.731028	-8.25895	1.46957e-16	1.54121e-15
ENSCHIG00000007867	5.46604	3.66389	0.812543	4.50916	6.50853e-06	2.40555e-05
ENSCHIG00000010017	5.40411	2.46567	0.367243	6.714	1.89363e-11	1.33287e-10
ENSCHIG00000025960	5.40292	-2.18867	0.371875	-5.8855	3.96856e-09	2.17089e-08
ENSCHIG00000003814	5.37869	-6.01397	1.26203	-4.76533	1.88542e-06	7.49016e-06
ENSCHIG00000026508	5.36046	5.77503	0.613965	9.40613	5.1474e-21	7.37353e-20
ENSCHIG00000009906	5.35107	-4.3216	0.604864	-7.14474	9.01671e-13	7.07664e-12
ENSCHIG00000016171	5.34229	-6.00165	0.63911	-9.39064	5.96357e-21	8.52078e-20
ENSCHIG00000014106	5.3328	-2.05519	0.35154	-5.84625	5.02775e-09	2.71651e-08
ENSCHIG00000021563	5.32969	-2.3523	0.333445	-7.05453	1.73185e-12	1.32561e-11
ENSCHIG00000024012	5.30589	2.5648	0.396115	6.47489	9.48806e-11	6.26182e-10
ENSCHIG00000022715	5.29265	-5.80206	0.661182	-8.77527	1.70488e-18	2.05929e-17
ENSCHIG00000005530	5.28448	-2.74516	0.605259	-4.53552	5.74621e-06	2.14323e-05
ENSCHIG00000006691	5.25287	-2.78253	0.791577	-3.51518	0.000439456	0.00121589
ENSCHIG00000025570	5.24254	2.13727	0.400263	5.33967	9.31174e-08	4.34453e-07
ENSCHIG00000023717	5.23153	-2.71275	0.420172	-6.4563	1.07293e-10	7.03932e-10
ENSCHIG00000026459	5.22137	5.73189	0.991281	5.78231	7.36811e-09	3.90652e-08
ENSCHIG00000012514	5.21852	5.02602	0.610744	8.22934	1.88247e-16	1.96806e-15
ENSCHIG00000011420	5.21773	-5.96445	0.605758	-9.84625	7.11468e-23	1.15584e-21
ENSCHIG00000022890	5.2019	5.03348	0.715121	7.03865	1.94117e-12	1.48176e-11
ENSCHIG00000006426	5.19911	5.25764	0.587874	8.94348	3.77091e-19	4.77562e-18
ENSCHIG00000025546	5.17818	5.72352	0.796427	7.1865	6.64749e-13	5.27414e-12
ENSCHIG00000019900	5.14799	-2.48542	0.433972	-5.72715	1.02129e-08	5.32529e-08
ENSCHIG00000000431	5.13257	-2.7125	0.525008	-5.1666	2.38391e-07	1.0582e-06
ENSCHIG00000018190	5.12918	-5.94385	0.675099	-8.80441	1.31543e-18	1.59927e-17
ENSCHIG00000016208	5.11406	-4.41743	0.606469	-7.28385	3.24416e-13	2.63009e-12
ENSCHIG00000008392	5.07067	3.00153	0.493405	6.08329	1.1774e-09	6.85804e-09
ENSCHIG00000011737	5.04963	-3.32229	0.454583	-7.30843	2.70283e-13	2.20191e-12
ENSCHIG00000024788	5.03868	-4.42002	0.916989	-4.82014	1.43457e-06	5.77872e-06
ENSCHIG00000025308	5.02239	-5.91498	0.632312	-9.35452	8.3983e-21	1.18177e-19
ENSCHIG00000020453	5.02107	5.44537	0.593781	9.17068	4.70045e-20	6.3216e-19
ENSCHIG00000019326	4.99192	-2.67277	0.369047	-7.24234	4.41001e-13	3.53414e-12
ENSCHIG00000016748	4.98953	4.06743	0.747463	5.44165	5.27882e-08	2.53873e-07
ENSCHIG00000010615	4.97628	-5.90028	0.807856	-7.30363	2.80102e-13	2.27968e-12
ENSCHIG00000023855	4.96426	-2.91791	0.422059	-6.9135	4.72832e-12	3.50525e-11
ENSCHIG00000019089	4.95847	-3.10038	0.444329	-6.97766	3.00148e-12	2.25407e-11
ENSCHIG00000016591	4.93088	-3.18081	0.442228	-7.19269	6.35251e-13	5.04729e-12
ENSCHIG00000012691	4.9196	2.54736	0.421569	6.04257	1.51676e-09	8.73131e-09
ENSCHIG00000013093	4.90909	-3.62095	0.529245	-6.84174	7.82389e-12	5.72144e-11
ENSCHIG00000020838	4.90674	5.64967	0.687056	8.22301	1.98458e-16	2.06706e-15
ENSCHIG00000005158	4.88779	5.63717	0.610882	9.22793	2.75912e-20	3.75299e-19
ENSCHIG00000025670	4.87737	2.46054	0.4463	5.5132	3.52364e-08	1.73556e-07
ENSCHIG00000001025	4.86959	5.1584	0.595593	8.66094	4.6788e-18	5.45436e-17
ENSCHIG00000026962	4.83322	-5.48447	0.737143	-7.44016	1.00563e-13	8.46056e-13
ENSCHIG00000018547	4.83159	2.37087	0.565444	4.19294	2.75362e-05	9.25459e-05
ENSCHIG00000011490	4.81929	-2.49163	0.485003	-5.13735	2.78645e-07	1.22776e-06
ENSCHIG00000016159	4.7961	5.60089	0.591442	9.46989	2.80143e-21	4.09009e-20
ENSCHIG00000018211	4.79186	5.61147	0.878257	6.38933	1.66614e-10	1.07209e-09
ENSCHIG00000008487	4.77539	5.59702	0.754761	7.41562	1.21054e-13	1.01082e-12
ENSCHIG00000002155	4.76169	-5.83992	0.606718	-9.62543	6.24482e-22	9.51637e-21
ENSCHIG00000006614	4.73701	-2.46422	0.399893	-6.16219	7.17435e-10	4.28334e-09
ENSCHIG00000005339	4.71627	-4.48118	0.598212	-7.49095	6.8378e-14	5.82607e-13
ENSCHIG00000014735	4.69176	-3.10171	0.408263	-7.59733	3.02306e-14	2.64174e-13
ENSCHIG00000024828	4.68406	-2.86484	0.53297	-5.37522	7.64879e-08	3.60792e-07
ENSCHIG00000016178	4.67044	4.65095	0.597378	7.7856	6.93821e-15	6.41516e-14
ENSCHIG00000025891	4.66506	4.62842	0.597953	7.74044	9.90762e-15	9.0161e-14
ENSCHIG00000015139	4.6526	2.20754	0.374977	5.88714	3.92946e-09	2.15091e-08
ENSCHIG00000010746	4.64294	3.5689	0.70847	5.03747	4.71714e-07	2.01421e-06
ENSCHIG00000009097	4.63684	4.17851	0.626035	6.67457	2.47966e-11	1.72791e-10
ENSCHIG00000022239	4.62531	5.56036	0.767064	7.24888	4.20229e-13	3.37576e-12
ENSCHIG00000019736	4.60858	2.3567	0.65645	3.59006	0.000330599	0.000933307
ENSCHIG00000024320	4.59823	-5.78325	0.629683	-9.18438	4.13918e-20	5.58923e-19
ENSCHIG00000022441	4.57907	2.43123	0.385227	6.31116	2.7695e-10	1.74248e-09
ENSCHIG00000011499	4.57137	-2.56493	0.447157	-5.73609	9.68865e-09	5.06299e-08
ENSCHIG00000000300	4.56453	-3.39711	0.561012	-6.05532	1.40142e-09	8.10079e-09
ENSCHIG00000014928	4.55731	2.01487	0.373209	5.39877	6.71009e-08	3.18974e-07
ENSCHIG00000011400	4.5548	-4.05575	0.787389	-5.15088	2.59269e-07	1.14601e-06
ENSCHIG00000020127	4.55342	2.19646	0.488348	4.49773	6.86824e-06	2.53402e-05
ENSCHIG00000010114	4.51366	2.23131	0.379826	5.87457	4.23946e-09	2.3085e-08
ENSCHIG00000002738	4.50081	-5.76008	0.692132	-8.32222	8.63278e-17	9.22725e-16
ENSCHIG00000007375	4.47597	5.50858	0.73359	7.50907	5.95507e-14	5.09995e-13
ENSCHIG00000026087	4.45278	-5.74407	0.811217	-7.08081	1.43318e-12	1.10459e-11
ENSCHIG00000021857	4.44575	2.13652	0.393027	5.43605	5.44749e-08	2.61758e-07
ENSCHIG00000019145	4.42031	2.22142	0.506745	4.3837	1.16682e-05	4.15456e-05
ENSCHIG00000003163	4.41533	4.55328	0.698764	6.51619	7.2115e-11	4.82026e-10
ENSCHIG00000000467	4.41393	-3.09542	0.598166	-5.17485	2.28094e-07	1.01573e-06
ENSCHIG00000009239	4.40965	3.65651	0.550727	6.63942	3.14928e-11	2.18359e-10
ENSCHIG00000017799	4.40794	-2.6349	0.523429	-5.03393	4.80531e-07	2.04768e-06
ENSCHIG00000009545	4.40305	-4.96197	0.623378	-7.95981	1.72301e-15	1.69035e-14
ENSCHIG00000019947	4.38223	3.44559	0.559563	6.15765	7.38333e-10	4.39712e-09
ENSCHIG00000015896	4.38058	-2.31896	0.511995	-4.52927	5.91887e-06	2.2032e-05
ENSCHIG00000020917	4.35888	2.45223	0.450541	5.44285	5.2435e-08	2.52246e-07
ENSCHIG00000023226	4.35763	2.87455	0.465094	6.18058	6.3866e-10	3.85293e-09
ENSCHIG00000026748	4.34449	-3.8283	0.782071	-4.89508	9.82652e-07	4.02919e-06
ENSCHIG00000003416	4.31515	-2.44914	0.404311	-6.05757	1.38197e-09	7.99111e-09
ENSCHIG00000012962	4.31229	-3.54336	0.695922	-5.0916	3.5506e-07	1.5437e-06
ENSCHIG00000021618	4.30978	-2.23656	0.445541	-5.01986	5.17088e-07	2.19451e-06
ENSCHIG00000007433	4.26216	-2.86318	0.523271	-5.47169	4.45756e-08	2.1662e-07
ENSCHIG00000026970	4.25625	2.9838	0.483177	6.17539	6.60001e-10	3.9574e-09
ENSCHIG00000011470	4.2268	2.20723	0.396346	5.56895	2.5628e-08	1.27926e-07
ENSCHIG00000023852	4.20555	-2.13092	0.368446	-5.78353	7.3149e-09	3.88078e-08
ENSCHIG00000025456	4.20509	2.13314	0.418818	5.09324	3.5199e-07	1.53195e-06
ENSCHIG00000025288	4.20285	2.19042	0.512492	4.27407	1.91939e-05	6.60622e-05
ENSCHIG00000013725	4.19523	-2.66628	0.881851	-3.0235	0.00249867	0.00600147
ENSCHIG00000005671	4.19405	-2.45967	0.408566	-6.02025	1.7415e-09	9.93607e-09
ENSCHIG00000022701	4.18134	4.7174	0.716501	6.58394	4.58135e-11	3.12853e-10
ENSCHIG00000020314	4.1711	-2.21586	0.352507	-6.28601	3.25726e-10	2.03481e-09
ENSCHIG00000020719	4.16078	2.92566	0.474635	6.16403	7.09158e-10	4.23544e-09
ENSCHIG00000009335	4.15819	-5.44553	0.553917	-9.83094	8.28391e-23	1.34318e-21
ENSCHIG00000012736	4.1569	4.93791	0.753479	6.55348	5.621e-11	3.80276e-10
ENSCHIG00000023751	4.14436	4.22545	0.601339	7.02674	2.11412e-12	1.60841e-11
ENSCHIG00000006993	4.14266	3.55167	0.550283	6.45427	1.08743e-10	7.13166e-10
ENSCHIG00000010075	4.13354	-2.01201	0.501034	-4.01571	5.92662e-05	0.000189545
ENSCHIG00000000883	4.12776	2.45405	0.462335	5.30795	1.10866e-07	5.1325e-07
ENSCHIG00000022311	4.12218	4.92442	0.61889	7.95686	1.76466e-15	1.72918e-14
ENSCHIG00000025478	4.12179	-2.51886	0.409965	-6.14409	8.04239e-10	4.77262e-09
ENSCHIG00000023812	4.11514	-5.62353	0.70635	-7.96139	1.7012e-15	1.66993e-14
ENSCHIG00000022362	4.08397	2.55211	0.429018	5.94872	2.70243e-09	1.50238e-08
ENSCHIG00000011546	4.05048	-5.41321	0.631916	-8.56635	1.06818e-17	1.21227e-16
ENSCHIG00000015404	4.04073	4.19307	0.613593	6.83363	8.27942e-12	6.0387e-11
ENSCHIG00000015617	4.02163	-2.01097	0.399459	-5.03425	4.79732e-07	2.04531e-06
ENSCHIG00000012824	4.01496	5.35541	0.8395	6.37928	1.77918e-10	1.14043e-09
ENSCHIG00000021685	4.01394	-5.59343	0.710825	-7.86893	3.57693e-15	3.40902e-14
ENSCHIG00000014763	4.01264	-2.60645	0.617353	-4.22198	2.42168e-05	8.21661e-05
ENSCHIG00000019961	3.99707	-3.85359	0.533474	-7.22358	5.0638e-13	4.05031e-12
ENSCHIG00000006692	3.9702	-5.38435	0.688296	-7.82272	5.16958e-15	4.82254e-14
ENSCHIG00000011115	3.90507	3.46701	0.563274	6.15511	7.50251e-10	4.46332e-09
ENSCHIG00000002235	3.90348	5.30363	0.62734	8.45415	2.81128e-17	3.10616e-16
ENSCHIG00000022495	3.90305	4.6066	0.679668	6.77773	1.22081e-11	8.76265e-11
ENSCHIG00000019193	3.89451	2.50003	0.810045	3.08628	0.00202677	0.00494332
ENSCHIG00000016407	3.88887	-3.99523	0.556099	-7.18438	6.75141e-13	5.35405e-12
ENSCHIG00000010706	3.88628	-3.36854	0.515957	-6.52874	6.63272e-11	4.46194e-10
ENSCHIG00000011830	3.83288	-2.02812	0.625953	-3.24005	0.0011951	0.00304598
ENSCHIG00000025265	3.80681	-3.07292	0.510729	-6.01675	1.77957e-09	1.01256e-08
ENSCHIG00000001297	3.80454	3.08537	0.498286	6.19196	5.94195e-10	3.60027e-09
ENSCHIG00000012869	3.76902	4.78276	0.699989	6.83261	8.3381e-12	6.07885e-11
ENSCHIG00000026061	3.7686	2.22164	0.419084	5.30119	1.15048e-07	5.31728e-07
ENSCHIG00000026316	3.76784	5.02097	0.704825	7.12372	1.05055e-12	8.19893e-12
ENSCHIG00000010819	3.74082	3.05493	0.508287	6.01024	1.85244e-09	1.05039e-08
ENSCHIG00000004376	3.73794	2.91154	0.500348	5.81903	5.91915e-09	3.17556e-08
ENSCHIG00000008968	3.73493	3.59465	0.741862	4.84544	1.26335e-06	5.1186e-06
ENSCHIG00000017060	3.71689	-3.92651	0.601792	-6.52471	6.81344e-11	4.56697e-10
ENSCHIG00000023747	3.70642	-2.17172	0.385686	-5.6308	1.79375e-08	9.09773e-08
ENSCHIG00000018704	3.70531	3.60025	0.585445	6.14959	7.76852e-10	4.61665e-09
ENSCHIG00000014679	3.70348	-2.16236	0.410515	-5.26742	1.38354e-07	6.3453e-07
ENSCHIG00000023960	3.69948	-5.27936	0.73695	-7.1638	7.84734e-13	6.18501e-12
ENSCHIG00000026821	3.69802	4.99961	0.673304	7.42549	1.12362e-13	9.40586e-13
ENSCHIG00000023721	3.69431	3.07452	0.57172	5.37766	7.546e-08	3.56447e-07
ENSCHIG00000009730	3.66692	2.16046	0.423678	5.09929	3.40924e-07	1.48766e-06
ENSCHIG00000011928	3.66399	-5.4606	0.990631	-5.51225	3.5428e-08	1.74396e-07
ENSCHIG00000003675	3.65387	-3.30904	1.09956	-3.00942	0.00261746	0.0062625
ENSCHIG00000019858	3.64623	-2.13653	0.421124	-5.07339	3.90793e-07	1.68896e-06
ENSCHIG00000018994	3.6459	2.36154	0.423836	5.57184	2.52068e-08	1.25974e-07
ENSCHIG00000023584	3.64351	2.26632	0.456147	4.9684	6.75066e-07	2.81916e-06
ENSCHIG00000017995	3.63625	-3.12978	0.460028	-6.80345	1.0214e-11	7.3789e-11
ENSCHIG00000021533	3.63301	-5.24443	0.59967	-8.74553	2.21964e-18	2.66182e-17
ENSCHIG00000006661	3.6209	3.17525	0.521109	6.09325	1.1064e-09	6.46252e-09
ENSCHIG00000027259	3.60104	-3.38141	0.518088	-6.52671	6.7232e-11	4.51372e-10
ENSCHIG00000020295	3.58562	-2.09422	0.381709	-5.48644	4.10116e-08	2.00348e-07
ENSCHIG00000005444	3.56867	3.136	0.522942	5.99684	2.01188e-09	1.13279e-08
ENSCHIG00000015181	3.56261	5.18218	1.1243	4.60924	4.04145e-06	1.53652e-05
ENSCHIG00000022665	3.55714	4.24329	0.709859	5.97766	2.26368e-09	1.26973e-08
ENSCHIG00000016887	3.55566	-4.43927	0.567597	-7.82116	5.23394e-15	4.87985e-14
ENSCHIG00000007521	3.5522	-2.8388	0.457912	-6.19944	5.66654e-10	3.44464e-09
ENSCHIG00000026732	3.53699	-3.65254	0.543994	-6.71431	1.88956e-11	1.33057e-10
ENSCHIG00000017761	3.53434	3.99041	0.605847	6.5865	4.50312e-11	3.07637e-10
ENSCHIG00000015719	3.53261	-2.08982	0.450481	-4.6391	3.49935e-06	1.34202e-05
ENSCHIG00000019529	3.52456	-5.40428	0.602514	-8.96955	2.97724e-19	3.80509e-18
ENSCHIG00000023178	3.51963	-2.07775	0.387225	-5.36576	8.06111e-08	3.79385e-07
ENSCHIG00000022127	3.50847	-2.33753	0.494106	-4.73082	2.2361e-06	8.77899e-06
ENSCHIG00000014905	3.50262	-5.19002	0.697114	-7.44501	9.69385e-14	8.18032e-13
ENSCHIG00000019699	3.47877	-2.50419	0.405055	-6.18233	6.31615e-10	3.81456e-09
ENSCHIG00000016710	3.47112	2.06838	0.407262	5.07874	3.79952e-07	1.64551e-06
ENSCHIG00000008107	3.46496	-4.59528	0.725138	-6.33712	2.34106e-10	1.48297e-09
ENSCHIG00000019702	3.45339	-2.79859	0.494146	-5.66348	1.4833e-08	7.61092e-08
ENSCHIG00000006056	3.4508	2.63685	0.466155	5.65659	1.54409e-08	7.91308e-08
ENSCHIG00000011995	3.43997	-3.1593	0.470189	-6.71921	1.82708e-11	1.28984e-10
ENSCHIG00000001313	3.43408	-5.36331	0.799983	-6.70428	2.02405e-11	1.4199e-10
ENSCHIG00000017591	3.39433	-4.96676	0.70208	-7.07435	1.50147e-12	1.15456e-11
ENSCHIG00000020332	3.37577	-4.55489	0.602226	-7.56344	3.92556e-14	3.39667e-13
ENSCHIG00000010254	3.36313	2.35251	0.587295	4.00567	6.18416e-05	0.000197091
ENSCHIG00000015581	3.3599	2.55728	0.505816	5.05576	4.28682e-07	1.84176e-06
ENSCHIG00000000317	3.35254	2.58675	0.463311	5.58318	2.36159e-08	1.18412e-07
ENSCHIG00000011415	3.3382	2.87248	0.694592	4.1355	3.54185e-05	0.000117107
ENSCHIG00000003475	3.3296	2.11487	0.477965	4.42473	9.65612e-06	3.47966e-05
ENSCHIG00000014377	3.32587	3.02328	0.54263	5.57154	2.52501e-08	1.26152e-07
ENSCHIG00000020612	3.32466	2.43189	0.497933	4.88397	1.03971e-06	4.25478e-06
ENSCHIG00000025656	3.32194	-2.9884	0.481876	-6.20159	5.58956e-10	3.40279e-09
ENSCHIG00000013396	3.30905	-4.33989	0.688923	-6.29954	2.98537e-10	1.87125e-09
ENSCHIG00000022198	3.29263	-5.31016	0.611245	-8.68744	3.70696e-18	4.37019e-17
ENSCHIG00000003565	3.28985	4.59516	0.851022	5.39958	6.67977e-08	3.17683e-07
ENSCHIG00000008225	3.26398	-2.41129	0.547345	-4.40543	1.05575e-05	3.78571e-05
ENSCHIG00000020140	3.25278	-2.83512	0.695919	-4.07392	4.62286e-05	0.00015003
ENSCHIG00000007301	3.245	-2.01565	0.446156	-4.51783	6.24777e-06	2.31634e-05
ENSCHIG00000012753	3.23992	-5.27535	0.593043	-8.89539	5.82151e-19	7.26256e-18
ENSCHIG00000024701	3.22182	4.78871	0.607363	7.88442	3.15995e-15	3.02029e-14
ENSCHIG00000017969	3.22065	2.52552	0.636635	3.96699	7.2786e-05	0.00022928
ENSCHIG00000009129	3.20243	3.61643	0.667058	5.42146	5.91158e-08	2.82596e-07
ENSCHIG00000012840	3.19244	-5.26271	0.811556	-6.48472	8.8897e-11	5.89485e-10
ENSCHIG00000016312	3.17851	-3.47429	0.599125	-5.79894	6.67359e-09	3.55181e-08
ENSCHIG00000017394	3.17093	5.01819	0.695046	7.21994	5.20087e-13	4.15796e-12
ENSCHIG00000021989	3.16757	2.26701	0.482841	4.69514	2.66427e-06	1.03699e-05
ENSCHIG00000018885	3.16529	-2.50763	0.475492	-5.27376	1.33653e-07	6.14319e-07
ENSCHIG00000002315	3.1579	-2.52327	0.520896	-4.84409	1.27194e-06	5.15094e-06
ENSCHIG00000015772	3.13963	2.49326	0.520082	4.79397	1.6351e-06	6.53923e-06
ENSCHIG00000017407	3.13584	-2.06434	0.562464	-3.67018	0.000242384	0.000700058
ENSCHIG00000019584	3.134	-4.45015	0.742036	-5.99722	2.00727e-09	1.13058e-08
ENSCHIG00000006754	3.13302	-5.04228	0.622398	-8.10136	5.43462e-16	5.52619e-15
ENSCHIG00000020400	3.12665	-5.03385	0.74606	-6.74725	1.50676e-11	1.07048e-10
ENSCHIG00000026074	3.12348	-5.23385	0.643154	-8.13778	4.02577e-16	4.12623e-15
ENSCHIG00000023617	3.10069	-5.22646	0.687207	-7.60537	2.84084e-14	2.48901e-13
ENSCHIG00000002872	3.08533	4.49816	0.606782	7.41314	1.23347e-13	1.02842e-12
ENSCHIG00000002274	3.06759	4.24616	0.633486	6.70285	2.04397e-11	1.43327e-10
ENSCHIG00000011227	3.06231	3.07828	0.60979	5.0481	4.46236e-07	1.9103e-06
ENSCHIG00000003058	3.03304	-3.09265	0.538468	-5.74344	9.27746e-09	4.85571e-08
ENSCHIG00000014956	3.03182	-4.7942	0.631085	-7.59675	3.03655e-14	2.65214e-13
ENSCHIG00000025031	3.02891	4.94436	0.718435	6.88213	5.89632e-12	4.34798e-11
ENSCHIG00000005568	3.02323	-2.27315	0.54099	-4.20183	2.64771e-05	8.92916e-05
ENSCHIG00000022845	3.02123	-4.59417	0.603022	-7.61858	2.5648e-14	2.2578e-13
ENSCHIG00000013326	3.00905	3.0605	0.573571	5.33587	9.50862e-08	4.43267e-07
ENSCHIG00000016363	3.00827	4.45043	0.677432	6.56956	5.04633e-11	3.42925e-10
ENSCHIG00000000039	3.00011	-2.40318	0.938281	-2.56126	0.0104295	0.0218922
ENSCHIG00000012401	2.98665	3.73869	0.978105	3.82238	0.00013217	0.000398104
ENSCHIG00000026726	2.98329	-3.97638	0.658009	-6.04306	1.5122e-09	8.70805e-09
ENSCHIG00000023197	2.97899	2.67886	0.542278	4.94002	7.8115e-07	3.24112e-06
ENSCHIG00000021226	2.97767	3.95931	0.6254	6.33085	2.43815e-10	1.54097e-09
ENSCHIG00000026331	2.9694	4.92335	0.693032	7.10408	1.21131e-12	9.37909e-12
ENSCHIG00000001947	2.9659	-4.76118	0.626498	-7.59967	2.96877e-14	2.59702e-13
ENSCHIG00000023542	2.94974	-3.5972	0.690279	-5.21123	1.87589e-07	8.4549e-07
ENSCHIG00000021557	2.92139	2.24526	0.476759	4.70942	2.48423e-06	9.70012e-06
ENSCHIG00000026016	2.9154	4.17504	0.617934	6.75645	1.41415e-11	1.00855e-10
ENSCHIG00000027076	2.91115	4.16132	0.616201	6.7532	1.44623e-11	1.03011e-10
ENSCHIG00000021800	2.90661	4.87444	0.656466	7.42528	1.12544e-13	9.41643e-13
ENSCHIG00000026487	2.90628	-4.11793	0.587979	-7.00354	2.49574e-12	1.88614e-11
ENSCHIG00000009669	2.89371	-4.32374	0.652994	-6.62142	3.55769e-11	2.4576e-10
ENSCHIG00000015115	2.8886	-2.6221	0.695851	-3.7682	0.000164429	0.000487802
ENSCHIG00000023089	2.88201	-2.99094	0.51568	-5.79999	6.63192e-09	3.53076e-08
ENSCHIG00000022772	2.87615	4.15561	0.61791	6.72527	1.75264e-11	1.23938e-10
ENSCHIG00000019300	2.87044	-5.10084	0.608484	-8.38287	5.16541e-17	5.58901e-16
ENSCHIG00000022824	2.86892	-3.71846	0.689273	-5.39477	6.86128e-08	3.2576e-07
ENSCHIG00000017901	2.86242	-2.59015	0.47653	-5.43544	5.46625e-08	2.62584e-07
ENSCHIG00000002242	2.85121	2.78082	0.538479	5.16421	2.4145e-07	1.07093e-06
ENSCHIG00000021436	2.85014	2.78235	0.541088	5.14213	2.71635e-07	1.19782e-06
ENSCHIG00000010948	2.84803	3.17168	0.605147	5.24118	1.59554e-07	7.24408e-07
ENSCHIG00000020858	2.84359	2.21201	0.545673	4.05372	5.04095e-05	0.000162745
ENSCHIG00000016135	2.84236	-2.26901	0.519294	-4.3694	1.24587e-05	4.41816e-05
ENSCHIG00000022717	2.83647	-4.09949	1.15401	-3.55238	0.000381764	0.00106366
ENSCHIG00000006667	2.83279	4.85289	0.632761	7.66939	1.72817e-14	1.53915e-13
ENSCHIG00000020041	2.83163	2.79656	0.604885	4.6233	3.77687e-06	1.44315e-05
ENSCHIG00000016064	2.82751	-3.87615	0.57687	-6.71928	1.82624e-11	1.28979e-10
ENSCHIG00000016791	2.81607	3.64446	1.02106	3.56928	0.000357967	0.00100304
ENSCHIG00000011011	2.8092	-2.36543	0.904269	-2.61585	0.00890066	0.0189835
ENSCHIG00000017460	2.77246	-2.20211	0.475816	-4.62808	3.6907e-06	1.41184e-05
ENSCHIG00000019021	2.77117	-2.19236	0.617785	-3.54874	0.000387077	0.00107756
ENSCHIG00000007647	2.74531	3.37868	0.667048	5.06512	4.08142e-07	1.75893e-06
ENSCHIG00000014960	2.74256	-3.44825	0.552778	-6.23804	4.43082e-10	2.7322e-09
ENSCHIG00000007701	2.73481	3.36319	0.646303	5.20374	1.95316e-07	8.77949e-07
ENSCHIG00000022882	2.72885	-5.04359	0.581613	-8.67172	4.25627e-18	4.98263e-17
ENSCHIG00000018662	2.71597	-3.45146	0.671896	-5.1369	2.79304e-07	1.23034e-06
ENSCHIG00000021346	2.71286	3.60338	0.644506	5.59092	2.2587e-08	1.13458e-07
ENSCHIG00000025636	2.70761	4.06255	0.626667	6.48279	9.00441e-11	5.96618e-10
ENSCHIG00000017955	2.69537	4.77013	0.616632	7.73577	1.02779e-14	9.34292e-14
ENSCHIG00000020385	2.68453	-4.60636	0.629629	-7.31598	2.55507e-13	2.08459e-12
ENSCHIG00000012832	2.68176	4.77659	0.742734	6.4311	1.26687e-10	8.25017e-10
ENSCHIG00000020617	2.67943	-5.01059	0.654479	-7.65585	1.92036e-14	1.70578e-13
ENSCHIG00000010670	2.66549	2.53039	0.597121	4.23764	2.25883e-05	7.70628e-05
ENSCHIG00000013116	2.66047	-2.09532	0.51385	-4.07769	4.54845e-05	0.000147758
ENSCHIG00000018401	2.65502	-2.32585	0.480852	-4.83693	1.31857e-06	5.33203e-06
ENSCHIG00000021652	2.65375	2.20655	0.515417	4.28109	1.85978e-05	6.4156e-05
ENSCHIG00000008951	2.64588	-4.97827	0.656175	-7.58681	3.27888e-14	2.85782e-13
ENSCHIG00000012973	2.64257	4.73432	0.611299	7.74468	9.58214e-15	8.73894e-14
ENSCHIG00000014057	2.63925	-2.58417	0.462915	-5.58237	2.37257e-08	1.18927e-07
ENSCHIG00000018188	2.63082	-2.45545	0.788413	-3.11442	0.00184304	0.00454091
ENSCHIG00000010028	2.62498	-4.78333	0.834917	-5.7291	1.00964e-08	5.26949e-08
ENSCHIG00000021400	2.62391	-3.0295	0.631493	-4.79736	1.60772e-06	6.44051e-06
ENSCHIG00000010431	2.62107	-4.97395	0.702427	-7.08109	1.43021e-12	1.1028e-11
ENSCHIG00000014772	2.61927	4.73276	0.712589	6.64163	3.10225e-11	2.15188e-10
ENSCHIG00000018022	2.61735	-2.32465	0.445082	-5.22297	1.76079e-07	7.9619e-07
ENSCHIG00000001584	2.60126	-4.9695	0.665469	-7.46766	8.16327e-14	6.91664e-13
ENSCHIG00000021635	2.60083	-2.21581	0.570011	-3.88731	0.000101363	0.0003112
ENSCHIG00000025470	2.59045	-2.40877	0.463208	-5.20019	1.9908e-07	8.93669e-07
ENSCHIG00000019930	2.58908	3.76101	0.61009	6.16468	7.06265e-10	4.21967e-09
ENSCHIG00000022604	2.58409	-2.67425	0.509312	-5.2507	1.51521e-07	6.90561e-07
ENSCHIG00000003509	2.58286	-2.56232	0.560654	-4.57024	4.87158e-06	1.83213e-05
ENSCHIG00000010121	2.57133	-2.79133	0.521481	-5.35271	8.6647e-08	4.05623e-07
ENSCHIG00000025064	2.55553	4.69582	0.669203	7.01703	2.26628e-12	1.71738e-11
ENSCHIG00000014039	2.55432	-2.66896	0.507611	-5.25788	1.45722e-07	6.65946e-07
ENSCHIG00000023203	2.54368	4.6963	0.741033	6.3375	2.33522e-10	1.47983e-09
ENSCHIG00000021581	2.52602	-2.03143	0.431044	-4.71281	2.4432e-06	9.54721e-06
ENSCHIG00000008723	2.5191	2.4219	0.519169	4.66497	3.08666e-06	1.19195e-05
ENSCHIG00000025994	2.5167	-3.51834	0.569854	-6.1741	6.65424e-10	3.98706e-09
ENSCHIG00000009324	2.51662	-3.33003	0.600871	-5.54202	2.9901e-08	1.48281e-07
ENSCHIG00000006729	2.49148	-3.49173	0.618403	-5.64636	1.63876e-08	8.35984e-08
ENSCHIG00000015326	2.48814	-3.689	0.584633	-6.30995	2.79125e-10	1.75551e-09
ENSCHIG00000007246	2.47819	4.16593	0.611427	6.81345	9.52831e-12	6.91641e-11
ENSCHIG00000009001	2.47623	3.21241	0.636299	5.04859	4.45079e-07	1.90584e-06
ENSCHIG00000022290	2.47152	-2.78007	0.574106	-4.84244	1.28257e-06	5.19272e-06
ENSCHIG00000012229	2.45615	3.91996	0.633773	6.18511	6.20585e-10	3.75202e-09
ENSCHIG00000002483	2.45289	3.9202	0.632867	6.19435	5.85272e-10	3.55007e-09
ENSCHIG00000013067	2.44913	-4.07273	0.895563	-4.54767	5.42429e-06	2.02859e-05
ENSCHIG00000006078	2.44807	-2.73351	0.513233	-5.32605	1.00371e-07	4.67122e-07
ENSCHIG00000005993	2.43263	4.13008	0.622463	6.63507	3.24351e-11	2.248e-10
ENSCHIG00000013632	2.41948	-2.04813	0.462023	-4.43297	9.29451e-06	3.35658e-05
ENSCHIG00000015126	2.41828	-4.65412	0.599334	-7.76549	8.13276e-15	7.46597e-14
ENSCHIG00000001612	2.41783	-2.0018	0.542479	-3.6901	0.000224165	0.000649344
ENSCHIG00000014356	2.41234	2.70815	0.589358	4.59509	4.32566e-06	1.63936e-05
ENSCHIG00000010286	2.40956	-2.32493	0.634423	-3.66463	0.000247699	0.000714545
ENSCHIG00000025094	2.40237	-4.25102	0.69238	-6.13973	8.26621e-10	4.89502e-09
ENSCHIG00000020521	2.39581	4.11442	0.661701	6.21795	5.03692e-10	3.08546e-09
ENSCHIG00000025634	2.37438	-3.19609	0.571203	-5.59537	2.20151e-08	1.10618e-07
ENSCHIG00000018753	2.36884	-4.63054	0.742894	-6.23311	4.57279e-10	2.81559e-09
ENSCHIG00000021809	2.3523	2.67552	0.583941	4.58184	4.60903e-06	1.73926e-05
ENSCHIG00000007770	2.3512	4.10951	0.646903	6.3526	2.11711e-10	1.34826e-09
ENSCHIG00000020658	2.34659	-3.20438	0.60725	-5.27687	1.3141e-07	6.04673e-07
ENSCHIG00000018952	2.33147	3.83335	1.02709	3.73224	0.000189787	0.000556708
ENSCHIG00000010152	2.32839	2.65501	0.630528	4.21078	2.54495e-05	8.6017e-05
ENSCHIG00000026563	2.32148	-4.60301	0.6193	-7.4326	1.06486e-13	8.93637e-13
ENSCHIG00000014250	2.31175	-4.79303	0.660273	-7.25917	3.89486e-13	3.13785e-12
ENSCHIG00000010454	2.30635	-4.5993	0.690582	-6.66003	2.73765e-11	1.90451e-10
ENSCHIG00000006321	2.28217	-4.7749	1.12396	-4.24827	2.15432e-05	7.36931e-05
ENSCHIG00000019450	2.27548	-2.16862	0.488548	-4.43892	9.04132e-06	3.27576e-05
ENSCHIG00000007702	2.27449	-4.77131	0.794788	-6.00324	1.93414e-09	1.0927e-08
ENSCHIG00000019392	2.26007	2.22603	0.531408	4.18893	2.80271e-05	9.41011e-05
ENSCHIG00000008653	2.25042	-2.6065	0.529498	-4.92259	8.54063e-07	3.53313e-06
ENSCHIG00000004423	2.24533	-3.73545	0.592763	-6.30175	2.94302e-10	1.84679e-09
ENSCHIG00000023872	2.23967	-4.12914	0.602403	-6.85445	7.15869e-12	5.24876e-11
ENSCHIG00000018371	2.2387	2.37811	0.552164	4.30688	1.65571e-05	5.75317e-05
ENSCHIG00000006767	2.23867	-2.31036	0.69296	-3.33404	0.000855932	0.00224062
ENSCHIG00000012092	2.23792	-3.52877	0.638728	-5.52469	3.30068e-08	1.63006e-07
ENSCHIG00000008347	2.22549	4.26153	0.774685	5.50099	3.77664e-08	1.8509e-07
ENSCHIG00000008409	2.17985	-4.51669	0.690416	-6.54198	6.07082e-11	4.09713e-10
ENSCHIG00000002509	2.17797	-4.71173	0.761977	-6.18357	6.26693e-10	3.7862e-09
ENSCHIG00000012958	2.17365	2.3553	0.577553	4.07807	4.54104e-05	0.000147546
ENSCHIG00000006561	2.16589	-2.00178	0.631551	-3.16963	0.00152636	0.00381692
ENSCHIG00000020624	2.15618	3.0101	0.689405	4.36623	1.2641e-05	4.47047e-05
ENSCHIG00000007526	2.14886	3.22324	0.656745	4.9079	9.20589e-07	3.79238e-06
ENSCHIG00000019924	2.14766	3.94803	0.789984	4.99761	5.80439e-07	2.44598e-06
ENSCHIG00000022664	2.14642	-4.27509	0.595409	-7.1801	6.96624e-13	5.51656e-12
ENSCHIG00000023502	2.14177	2.51287	0.585596	4.29113	1.77767e-05	6.14627e-05
ENSCHIG00000004016	2.13481	4.42619	0.678541	6.52309	6.88738e-11	4.61468e-10
ENSCHIG00000004844	2.134	-3.24833	0.718966	-4.51806	6.24084e-06	2.31429e-05
ENSCHIG00000014933	2.13389	4.42624	0.684701	6.46448	1.01645e-10	6.68715e-10
ENSCHIG00000023227	2.12334	2.71812	0.610561	4.45184	8.51367e-06	3.09465e-05
ENSCHIG00000014939	2.1201	-4.67711	0.715898	-6.53321	6.43766e-11	4.33595e-10
ENSCHIG00000015661	2.11543	-2.21047	0.609441	-3.62705	0.000286675	0.000817945
ENSCHIG00000025438	2.11142	-2.19237	0.683053	-3.20966	0.0013289	0.00335477
ENSCHIG00000005307	2.10829	-4.05579	0.890031	-4.55691	5.19114e-06	1.94793e-05
ENSCHIG00000017340	2.10631	-2.31371	0.559502	-4.1353	3.54492e-05	0.000117185
ENSCHIG00000000870	2.10076	3.92838	0.75233	5.22162	1.77361e-07	8.01553e-07
ENSCHIG00000013127	2.0987	4.16674	0.683578	6.09548	1.0911e-09	6.38206e-09
ENSCHIG00000019472	2.09486	-4.65348	0.751393	-6.19313	5.89797e-10	3.57622e-09
ENSCHIG00000010107	2.09107	-3.60515	0.611134	-5.89912	3.65438e-09	2.00811e-08
ENSCHIG00000009568	2.08665	-3.63614	0.627111	-5.79824	6.7016e-09	3.56559e-08
ENSCHIG00000020293	2.08199	-2.18063	0.561895	-3.88086	0.000104089	0.000318926
ENSCHIG00000011455	2.07036	-3.59853	0.631712	-5.69648	1.22309e-08	6.33602e-08
ENSCHIG00000021900	2.0682	-2.16543	0.58428	-3.70614	0.000210438	0.000611599
ENSCHIG00000025998	2.04905	-4.61671	0.641745	-7.194	6.29197e-13	5.00394e-12
ENSCHIG00000023565	2.04752	-2.40629	0.551042	-4.36681	1.26075e-05	4.46051e-05
ENSCHIG00000019241	2.04737	-4.0115	0.673402	-5.95706	2.56818e-09	1.4306e-08
ENSCHIG00000020091	2.03518	4.37786	0.639918	6.84128	7.84879e-12	5.73713e-11
ENSCHIG00000007215	2.03434	-4.60105	0.630396	-7.29866	2.90658e-13	2.36215e-12
ENSCHIG00000006437	2.03203	-3.1426	0.628066	-5.00361	5.62665e-07	2.37647e-06
ENSCHIG00000016251	2.02818	3.88305	0.634073	6.12398	9.1266e-10	5.37405e-09
ENSCHIG00000014875	2.02444	-4.18968	0.663481	-6.31469	2.70709e-10	1.70514e-09
ENSCHIG00000021178	2.00922	3.38156	0.76241	4.43535	9.19214e-06	3.32392e-05
ENSCHIG00000004289	2.00627	-4.39656	0.592008	-7.42652	1.11489e-13	9.3375e-13
ENSCHIG00000025293	1.99405	3.11346	0.630424	4.93867	7.86563e-07	3.26277e-06
ENSCHIG00000000433	1.9938	-3.1431	0.802386	-3.91719	8.95869e-05	0.000277441
ENSCHIG00000025037	1.97929	4.09392	0.764794	5.35298	8.65197e-08	4.0514e-07
ENSCHIG00000014498	1.97584	4.31781	0.661519	6.52712	6.70478e-11	4.50497e-10
ENSCHIG00000020056	1.96568	2.00342	0.577442	3.46947	0.000521478	0.00142211
ENSCHIG00000021001	1.96376	3.33808	0.636155	5.24728	1.54365e-07	7.02577e-07
ENSCHIG00000026841	1.96308	-2.06189	0.512449	-4.02359	5.73179e-05	0.000183595
ENSCHIG00000019231	1.95873	-3.32008	0.625312	-5.30948	1.09937e-07	5.09373e-07
ENSCHIG00000020702	1.95688	2.37368	0.579293	4.09754	4.17571e-05	0.000136579
ENSCHIG00000010520	1.94668	-3.50567	0.577695	-6.06837	1.29215e-09	7.49769e-09
ENSCHIG00000005122	1.94603	4.05879	0.648138	6.26223	3.79513e-10	2.35586e-09
ENSCHIG00000026175	1.941	2.57408	0.726155	3.5448	0.000392908	0.00109216
ENSCHIG00000020339	1.94053	4.31579	0.676381	6.38071	1.76271e-10	1.13031e-09
ENSCHIG00000013357	1.92728	2.32775	0.603995	3.85392	0.000116243	0.000353638
ENSCHIG00000020568	1.91332	-4.52663	0.667441	-6.78207	1.18464e-11	8.514e-11
ENSCHIG00000024428	1.90988	-4.11538	0.604884	-6.80358	1.02052e-11	7.37575e-11
ENSCHIG00000000421	1.90665	-2.15202	0.531569	-4.04843	5.15613e-05	0.000166143
ENSCHIG00000026102	1.906	2.58296	0.64279	4.01836	5.86053e-05	0.000187539
ENSCHIG00000018509	1.88678	-3.0499	0.620019	-4.91905	8.69663e-07	3.5941e-06
ENSCHIG00000018031	1.86736	-3.44539	1.05479	-3.26641	0.00108919	0.00279348
ENSCHIG00000000814	1.84194	2.25382	0.589547	3.82296	0.00013186	0.000397315
ENSCHIG00000016874	1.84138	-3.42397	0.610644	-5.60715	2.05686e-08	1.03662e-07
ENSCHIG00000012264	1.83422	-4.25185	0.59683	-7.12406	1.04796e-12	8.18247e-12
ENSCHIG00000011107	1.82085	3.7247	0.637566	5.84206	5.15602e-09	2.77953e-08
ENSCHIG00000018543	1.81899	3.4504	0.631394	5.46474	4.63587e-08	2.24696e-07
ENSCHIG00000019080	1.81061	-2.78145	0.710135	-3.91679	8.97373e-05	0.000277833
ENSCHIG00000013314	1.81031	-4.4444	0.953051	-4.66335	3.1111e-06	1.20056e-05
ENSCHIG00000022819	1.79874	-2.9748	0.978953	-3.03876	0.00237555	0.00572303
ENSCHIG00000025609	1.78647	2.94146	0.741662	3.96604	7.30778e-05	0.000230021
ENSCHIG00000026417	1.78257	-4.4027	0.636456	-6.91752	4.59635e-12	3.40892e-11
ENSCHIG00000010463	1.78006	-4.21831	0.606973	-6.94974	3.65957e-12	2.73356e-11
ENSCHIG00000007995	1.77409	2.28386	0.743886	3.07018	0.00213932	0.00519585
ENSCHIG00000003162	1.76413	4.16739	0.744083	5.60071	2.13477e-08	1.07523e-07
ENSCHIG00000025053	1.76402	-3.57684	0.99352	-3.60017	0.000318012	0.000900593
ENSCHIG00000023815	1.75747	3.91144	0.961451	4.06827	4.7364e-05	0.000153446
ENSCHIG00000013784	1.75604	-2.00956	0.522235	-3.848	0.000119085	0.000362019
ENSCHIG00000007699	1.75563	-4.39728	1.17777	-3.73358	0.000188778	0.000554038
ENSCHIG00000007727	1.75381	2.66113	0.628693	4.2328	2.30798e-05	7.86434e-05
ENSCHIG00000014337	1.74506	-4.38579	0.654692	-6.699	2.09846e-11	1.47024e-10
ENSCHIG00000018647	1.739	-2.68352	0.630197	-4.25823	2.06056e-05	7.05722e-05
ENSCHIG00000010956	1.73761	-4.38094	0.597586	-7.33106	2.28341e-13	1.87116e-12
ENSCHIG00000020580	1.73656	2.87233	0.710138	4.04475	5.23791e-05	0.000168648
ENSCHIG00000010202	1.72344	3.13324	0.634995	4.93427	8.04514e-07	3.33641e-06
ENSCHIG00000010919	1.71631	4.11829	0.639435	6.44051	1.19074e-10	7.77261e-10
ENSCHIG00000022343	1.71207	-3.9376	0.609416	-6.46127	1.03829e-10	6.81739e-10
ENSCHIG00000007638	1.70182	-3.3056	0.782238	-4.22583	2.38064e-05	8.0938e-05
ENSCHIG00000016414	1.69679	-2.31172	0.824956	-2.80223	0.005075	0.0114338
ENSCHIG00000026279	1.69486	-4.13081	0.681201	-6.06401	1.32768e-09	7.69587e-09
ENSCHIG00000010542	1.68944	-3.72091	0.824395	-4.51351	6.37648e-06	2.36092e-05
ENSCHIG00000009150	1.68932	-2.09777	0.591024	-3.54938	0.000386136	0.00107512
ENSCHIG00000026649	1.68162	4.10264	0.962389	4.26297	2.01723e-05	6.91451e-05
ENSCHIG00000009411	1.67999	-2.36688	0.788927	-3.00013	0.00269865	0.00644107
ENSCHIG00000012316	1.67944	-2.42924	0.580025	-4.18816	2.81224e-05	9.43831e-05
ENSCHIG00000014044	1.67814	-2.42449	0.571147	-4.24496	2.18637e-05	7.47128e-05
ENSCHIG00000008304	1.67427	-4.32594	0.620442	-6.97234	3.11703e-12	2.3356e-11
ENSCHIG00000007675	1.67156	3.84696	0.698416	5.50812	3.62688e-08	1.78168e-07
ENSCHIG00000014739	1.67026	2.31628	0.633895	3.65404	0.000258147	0.000742762
ENSCHIG00000014641	1.6688	-3.28964	0.600154	-5.48133	4.22142e-08	2.05622e-07
ENSCHIG00000025400	1.66229	-3.69543	0.829909	-4.45281	8.47522e-06	3.08202e-05
ENSCHIG00000022513	1.65344	3.04761	0.683242	4.46052	8.17612e-06	2.97973e-05
ENSCHIG00000005338	1.65179	-4.29158	0.653102	-6.57107	4.99552e-11	3.39748e-10
ENSCHIG00000013264	1.64555	-4.29843	0.616276	-6.97484	3.06221e-12	2.29762e-11
ENSCHIG00000023981	1.64042	3.04366	0.64905	4.6894	2.74004e-06	1.064e-05
ENSCHIG00000005426	1.63351	-2.22739	0.926687	-2.40361	0.0162342	0.0325287
ENSCHIG00000016916	1.62991	4.05333	0.636121	6.37194	1.86656e-10	1.1937e-09
ENSCHIG00000022813	1.62869	3.04417	0.791125	3.84791	0.000119132	0.000362096
ENSCHIG00000024071	1.62414	2.5228	0.94441	2.6713	0.00755581	0.0163805
ENSCHIG00000022005	1.62265	-3.86337	0.775247	-4.98341	6.2474e-07	2.62171e-06
ENSCHIG00000024663	1.61497	3.01615	0.681071	4.42854	9.48737e-06	3.42254e-05
ENSCHIG00000011461	1.61395	-2.4145	0.825428	-2.92515	0.00344295	0.00804975
ENSCHIG00000011624	1.61257	-2.17007	0.657935	-3.29831	0.000972693	0.00251399
ENSCHIG00000009521	1.60238	-4.26552	0.718026	-5.94061	2.83961e-09	1.57498e-08
ENSCHIG00000000083	1.60214	3.77163	0.661067	5.70536	1.16094e-08	6.02157e-08
ENSCHIG00000023773	1.59372	-3.41208	0.591834	-5.76526	8.15334e-09	4.29695e-08
ENSCHIG00000016428	1.59065	4.02059	0.650711	6.17876	6.46082e-10	3.88509e-09
ENSCHIG00000019513	1.5867	-2.53005	0.596747	-4.23975	2.23772e-05	7.63741e-05
ENSCHIG00000026660	1.5845	2.00935	0.587013	3.423	0.000619341	0.00166562
ENSCHIG00000018660	1.58371	-3.6035	0.643954	-5.5959	2.1948e-08	1.10347e-07
ENSCHIG00000000158	1.57468	-2.52872	0.603463	-4.19035	2.7852e-05	9.3532e-05
ENSCHIG00000013757	1.57311	-3.40169	0.64637	-5.26275	1.41916e-07	6.49975e-07
ENSCHIG00000026411	1.56403	3.48385	0.66532	5.23635	1.63779e-07	7.42985e-07
ENSCHIG00000024967	1.55303	2.20826	0.663821	3.32659	0.000879147	0.002296
ENSCHIG00000012809	1.55106	-4.21265	0.65379	-6.44343	1.16805e-10	7.63643e-10
ENSCHIG00000002944	1.54608	-4.22184	0.667228	-6.32743	2.49277e-10	1.5743e-09
ENSCHIG00000021727	1.544	-3.99612	0.697997	-5.72512	1.03359e-08	5.38438e-08
ENSCHIG00000013813	1.54393	-2.93715	0.726386	-4.04351	5.26558e-05	0.000169506
ENSCHIG00000023391	1.54068	-4.20568	0.627599	-6.70123	2.06677e-11	1.44865e-10
ENSCHIG00000014117	1.5397	-3.99295	0.598128	-6.67575	2.45977e-11	1.71476e-10
ENSCHIG00000009057	1.53054	2.93542	0.654312	4.48627	7.24801e-06	2.66472e-05
ENSCHIG00000023934	1.51899	-3.10671	0.605935	-5.12714	2.94184e-07	1.2918e-06
ENSCHIG00000010300	1.51842	-2.45181	0.656496	-3.73469	0.000187947	0.000551695
ENSCHIG00000012433	1.51666	-3.99148	0.978388	-4.07965	4.51028e-05	0.000146689
ENSCHIG00000016245	1.51444	-2.47033	0.635284	-3.88854	0.00010085	0.000309927
ENSCHIG00000013143	1.51258	-3.98457	0.806376	-4.94134	7.75887e-07	3.22009e-06
ENSCHIG00000009071	1.5116	-2.69208	0.610232	-4.41157	1.02626e-05	3.68391e-05
ENSCHIG00000008374	1.50239	-2.89584	0.709961	-4.07887	4.52554e-05	0.000147157
ENSCHIG00000017270	1.50035	-2.87125	0.708766	-4.05105	5.09873e-05	0.000164389
ENSCHIG00000010331	1.49551	-3.09636	0.601939	-5.14398	2.68984e-07	1.18769e-06
ENSCHIG00000019661	1.49136	2.66046	1.00658	2.64307	0.00821587	0.0176536
ENSCHIG00000010751	1.48269	-3.50167	0.603699	-5.80037	6.61706e-09	3.52509e-08
ENSCHIG00000024412	1.47731	2.3631	0.795938	2.96894	0.00298825	0.00706972
ENSCHIG00000018276	1.47474	-4.14159	0.607476	-6.8177	9.25122e-12	6.72696e-11
ENSCHIG00000003606	1.47401	2.12989	0.643088	3.31198	0.000926385	0.00240621
ENSCHIG00000020833	1.47296	3.64053	0.645739	5.63778	1.72257e-08	8.76863e-08
ENSCHIG00000008430	1.47051	-3.2596	0.749884	-4.34681	1.38133e-05	4.86245e-05
ENSCHIG00000000165	1.46868	-3.9259	0.700509	-5.60435	2.09034e-08	1.05317e-07
ENSCHIG00000016965	1.46409	-3.71106	0.635173	-5.84259	5.13943e-09	2.77238e-08
ENSCHIG00000020728	1.46368	-2.43256	0.632371	-3.84674	0.000119701	0.000363694
ENSCHIG00000023228	1.45561	2.36768	0.678485	3.48965	0.000483652	0.00132544
ENSCHIG00000022296	1.4534	-4.1278	0.864729	-4.77352	1.81032e-06	7.20207e-06
ENSCHIG00000021464	1.45175	-3.89864	0.609132	-6.40032	1.55052e-10	9.99618e-10
ENSCHIG00000027254	1.45	-4.125	1.3482	-3.05963	0.00221608	0.00536513
ENSCHIG00000006632	1.42361	-3.46351	0.705882	-4.90664	9.265e-07	3.81391e-06
ENSCHIG00000014412	1.42236	-2.77232	0.618788	-4.48025	7.45563e-06	2.73264e-05
ENSCHIG00000007853	1.42007	-3.01457	0.606652	-4.96919	6.72328e-07	2.80842e-06
ENSCHIG00000019660	1.42004	3.59472	0.830259	4.32964	1.49355e-05	5.23431e-05
ENSCHIG00000006456	1.41941	-4.09648	0.679186	-6.03145	1.62497e-09	9.31569e-09
ENSCHIG00000022270	1.41492	-2.98784	0.630766	-4.73684	2.17076e-06	8.53849e-06
ENSCHIG00000014760	1.41438	-3.45381	0.59999	-5.75644	8.59042e-09	4.51024e-08
ENSCHIG00000001419	1.40983	-3.00602	0.649162	-4.63061	3.64585e-06	1.39566e-05
ENSCHIG00000010709	1.40897	2.04784	0.636312	3.21831	0.0012895	0.00326467
ENSCHIG00000002038	1.40843	-3.65478	1.19399	-3.06099	0.00220609	0.00534326
ENSCHIG00000002161	1.40439	2.55703	0.649235	3.93853	8.19836e-05	0.000255516
ENSCHIG00000016896	1.40249	-3.00905	0.650042	-4.62902	3.67405e-06	1.40579e-05
ENSCHIG00000014152	1.40176	3.84375	0.720175	5.33725	9.43685e-08	4.40044e-07
ENSCHIG00000019454	1.39981	-2.33482	0.858358	-2.7201	0.00652622	0.0143513
ENSCHIG00000002517	1.39838	-3.61585	0.722253	-5.00635	5.54715e-07	2.34408e-06
ENSCHIG00000025287	1.38823	-2.51321	0.873731	-2.87641	0.00402221	0.00926289
ENSCHIG00000010376	1.3871	-2.76145	0.652196	-4.23408	2.2949e-05	7.82298e-05
ENSCHIG00000020484	1.38394	3.8173	1.46634	2.60329	0.00923336	0.0196229
ENSCHIG00000002559	1.38187	-2.29114	0.643871	-3.55838	0.000373149	0.00104209
ENSCHIG00000012266	1.38047	-3.61216	0.637291	-5.66799	1.44483e-08	7.42717e-08
ENSCHIG00000015450	1.37948	-3.81881	0.745464	-5.12272	3.01152e-07	1.32066e-06
ENSCHIG00000001330	1.37661	-4.0428	0.675513	-5.98479	2.16673e-09	1.21711e-08
ENSCHIG00000012692	1.36648	-2.47174	0.63541	-3.88999	0.00010025	0.00030835
ENSCHIG00000008744	1.36465	-3.37997	0.736685	-4.58809	4.47326e-06	1.69108e-05
ENSCHIG00000025103	1.36167	-2.91904	0.621582	-4.69614	2.6512e-06	1.03262e-05
ENSCHIG00000025617	1.35465	2.22524	0.697788	3.189	0.00142767	0.00358408
ENSCHIG00000012409	1.34825	-4.01218	0.746192	-5.37687	7.57915e-08	3.5781e-07
ENSCHIG00000008572	1.34597	-2.69192	0.81016	-3.3227	0.000891518	0.00232604
ENSCHIG00000021487	1.34577	-2.7094	0.74549	-3.63439	0.000278644	0.000796664
ENSCHIG00000026533	1.3383	-2.70635	0.65567	-4.12761	3.66548e-05	0.000120812
ENSCHIG00000026506	1.33297	-3.32122	0.633108	-5.2459	1.55525e-07	7.0765e-07
ENSCHIG00000000717	1.32592	3.74984	0.663679	5.65008	1.60372e-08	8.18857e-08
ENSCHIG00000014752	1.32317	-3.97701	0.640778	-6.20653	5.41662e-10	3.30473e-09
ENSCHIG00000020328	1.31814	-3.09166	0.635586	-4.86427	1.14882e-06	4.67613e-06
ENSCHIG00000010999	1.31705	2.43784	0.668226	3.64823	0.000264058	0.000757941
ENSCHIG00000008577	1.31672	2.17734	0.754784	2.88471	0.00391769	0.0090471
ENSCHIG00000013482	1.31411	-3.55662	1.1256	-3.15976	0.00157899	0.00393971
ENSCHIG00000010456	1.30989	-3.97084	0.664781	-5.97315	2.32711e-09	1.30108e-08
ENSCHIG00000010396	1.30937	3.48332	0.672003	5.18349	2.1777e-07	9.7331e-07
ENSCHIG00000000498	1.30482	2.69536	0.656785	4.10387	4.06295e-05	0.000133099
ENSCHIG00000024430	1.29822	2.13444	0.682017	3.1296	0.00175043	0.00432678
ENSCHIG00000017316	1.29413	2.42545	0.689933	3.51549	0.000438944	0.0012149
ENSCHIG00000011725	1.2906	-2.63663	0.616963	-4.27357	1.92366e-05	6.61684e-05
ENSCHIG00000011136	1.28576	2.92345	0.653274	4.47507	7.6386e-06	2.79419e-05
ENSCHIG00000025408	1.28384	3.44756	0.648299	5.31785	1.05002e-07	4.87453e-07
ENSCHIG00000010733	1.28321	-2.3773	0.704484	-3.37452	0.00073944	0.00195837
ENSCHIG00000021215	1.27888	3.44561	0.665387	5.17836	2.2384e-07	9.97849e-07
ENSCHIG00000017120	1.27418	-2.59726	0.654405	-3.96889	7.2208e-05	0.000227712
ENSCHIG00000004359	1.27232	-2.59601	0.616979	-4.20762	2.58073e-05	8.71557e-05
ENSCHIG00000011771	1.26711	-3.94321	0.802791	-4.91187	9.02096e-07	3.71803e-06
ENSCHIG00000016778	1.2618	-2.81863	0.839829	-3.35619	0.000790235	0.00208464
ENSCHIG00000008873	1.25758	3.68116	1.05469	3.49027	0.000482531	0.00132259
ENSCHIG00000022462	1.25689	2.34852	0.682267	3.44223	0.00057694	0.00156139
ENSCHIG00000014652	1.25689	-3.70206	0.675442	-5.48095	4.23046e-08	2.06002e-07
ENSCHIG00000025999	1.25268	-2.36218	0.613229	-3.85204	0.000117137	0.000356293
ENSCHIG00000025463	1.25214	-3.03126	0.703316	-4.30996	1.63286e-05	5.68203e-05
ENSCHIG00000001933	1.24971	-3.25239	0.760838	-4.27475	1.91353e-05	6.5874e-05
ENSCHIG00000012217	1.24677	-2.79916	0.747026	-3.74707	0.00017891	0.00052702
ENSCHIG00000011826	1.24515	2.34335	0.656894	3.56732	0.000360656	0.00100939
ENSCHIG00000003989	1.2354	-3.43047	0.686172	-4.99943	5.75002e-07	2.42551e-06
ENSCHIG00000011898	1.23474	-2.33068	0.776336	-3.00215	0.0026808	0.00640305
ENSCHIG00000025176	1.23166	3.10531	0.665442	4.66653	3.06326e-06	1.18319e-05
ENSCHIG00000004042	1.22986	-3.88542	0.691862	-5.61589	1.95555e-08	9.87941e-08
ENSCHIG00000007901	1.21682	-2.51066	0.644515	-3.89542	9.80293e-05	0.000301852
ENSCHIG00000021172	1.20743	-2.97776	0.79326	-3.75382	0.000174157	0.000514014
ENSCHIG00000025840	1.2045	-2.69386	0.625889	-4.30405	1.67701e-05	5.82234e-05
ENSCHIG00000010188	1.20119	-2.52402	0.671915	-3.75646	0.000172333	0.00050944
ENSCHIG00000026695	1.19805	-3.62673	0.668705	-5.42351	5.84402e-08	2.79607e-07
ENSCHIG00000023109	1.19696	3.59591	0.706876	5.08705	3.6367e-07	1.57745e-06
ENSCHIG00000020386	1.19535	-3.84879	1.07214	-3.58983	0.000330889	0.000933739
ENSCHIG00000013565	1.19294	3.35563	0.846826	3.9626	7.41381e-05	0.000233139
ENSCHIG00000020644	1.19074	3.59172	0.690327	5.20293	1.9617e-07	8.8108e-07
ENSCHIG00000020602	1.18994	2.28924	0.689687	3.31925	0.00090261	0.00235034
ENSCHIG00000025977	1.18885	-2.04048	0.629841	-3.23968	0.00119664	0.00304943
ENSCHIG00000015569	1.18186	-2.00203	0.631832	-3.1686	0.00153172	0.00382977
ENSCHIG00000000153	1.16953	3.57971	0.718152	4.98462	6.20847e-07	2.60706e-06
ENSCHIG00000001690	1.16795	-3.82216	0.752107	-5.08193	3.73614e-07	1.61931e-06
ENSCHIG00000015205	1.16672	-2.92058	0.978176	-2.98575	0.00282888	0.00672885
ENSCHIG00000021827	1.16136	2.744	0.663199	4.13751	3.51088e-05	0.000116175
ENSCHIG00000019618	1.16006	-3.78728	0.706258	-5.36246	8.20978e-08	3.85585e-07
ENSCHIG00000013238	1.15449	2.20335	0.692033	3.18388	0.00145317	0.00364426
ENSCHIG00000014046	1.14781	-3.79419	0.702405	-5.40172	6.60057e-08	3.14185e-07
ENSCHIG00000024779	1.14518	-3.57171	0.840726	-4.24836	2.15338e-05	7.36759e-05
ENSCHIG00000007641	1.14272	2.20089	0.679726	3.2379	0.00120411	0.00306614
ENSCHIG00000017960	1.14154	-3.09143	0.639888	-4.8312	1.35713e-06	5.47865e-06
ENSCHIG00000011144	1.14095	-2.63666	0.627333	-4.20297	2.6344e-05	8.88784e-05
ENSCHIG00000001983	1.13317	2.19764	0.677077	3.24578	0.00117131	0.00299172
ENSCHIG00000005171	1.13212	-3.76555	0.652502	-5.77094	7.88317e-09	4.16376e-08
ENSCHIG00000025496	1.1296	-3.76344	0.802295	-4.69084	2.72083e-06	1.05777e-05
ENSCHIG00000009788	1.12716	-3.75986	1.01184	-3.71587	0.000202504	0.00059059
ENSCHIG00000023118	1.12397	-3.53653	0.7056	-5.01209	5.38427e-07	2.27986e-06
ENSCHIG00000023260	1.12026	-2.14527	0.903558	-2.37425	0.0175845	0.0349578
ENSCHIG00000013185	1.11859	2.69671	0.681842	3.95504	7.65205e-05	0.000239891
ENSCHIG00000015468	1.10708	-2.34392	0.644715	-3.6356	0.000277335	0.000793328
ENSCHIG00000027074	1.10601	-3.29181	0.803708	-4.09578	4.20749e-05	0.000137564
ENSCHIG00000014207	1.09956	2.14432	0.881529	2.4325	0.014995	0.0302815
ENSCHIG00000020650	1.09719	-3.72168	0.735797	-5.05802	4.2363e-07	1.82239e-06
ENSCHIG00000023134	1.09554	-3.7184	1.09075	-3.40904	0.000651921	0.00174594
ENSCHIG00000012611	1.094	-3.27509	0.933854	-3.50707	0.000453078	0.00124882
ENSCHIG00000022235	1.09155	-2.34824	0.689642	-3.40501	0.000661605	0.00176949
ENSCHIG00000016823	1.08784	3.45865	0.679193	5.09229	3.53765e-07	1.53847e-06
ENSCHIG00000023410	1.08462	2.13712	0.691715	3.08959	0.00200433	0.00489645
ENSCHIG00000004176	1.07512	-2.30257	0.656937	-3.50501	0.000456582	0.00125744
ENSCHIG00000022325	1.07312	-3.22864	0.776968	-4.15544	3.24665e-05	0.000108051
ENSCHIG00000021185	1.07254	-3.68471	0.848352	-4.34337	1.40314e-05	4.93299e-05
ENSCHIG00000008484	1.07155	-2.25854	0.661307	-3.41527	0.000637188	0.00170895
ENSCHIG00000018491	1.06993	-3.24051	0.852977	-3.79905	0.00014525	0.000434683
ENSCHIG00000000460	1.06676	-3.67914	0.641876	-5.73186	9.93345e-09	5.18605e-08
ENSCHIG00000025639	1.06625	-3.23105	1.1231	-2.8769	0.00401602	0.0092499
ENSCHIG00000011562	1.06154	2.11231	0.840057	2.51449	0.0119205	0.0247148
ENSCHIG00000023677	1.06054	3.15739	0.942765	3.34908	0.000810807	0.0021295
ENSCHIG00000021339	1.0552	-3.21649	1.15013	-2.79664	0.0051637	0.0116133
ENSCHIG00000014078	1.05101	3.41197	0.722945	4.71954	2.36373e-06	9.25398e-06
ENSCHIG00000007266	1.04654	-3.66396	0.681444	-5.37676	7.58368e-08	3.57923e-07
ENSCHIG00000026720	1.04488	3.40787	0.702729	4.84948	1.23786e-06	5.02142e-06
ENSCHIG00000023768	1.04203	-2.23959	0.66421	-3.37181	0.000746771	0.00197685
ENSCHIG00000013112	1.03701	-2.96271	0.759316	-3.90181	9.54754e-05	0.000294313
ENSCHIG00000024679	1.035	-2.23324	0.702462	-3.17915	0.00147706	0.00370083
ENSCHIG00000026627	1.03151	-3.63089	0.715938	-5.07152	3.94649e-07	1.70386e-06
ENSCHIG00000019945	1.03145	-2.94945	1.18175	-2.49583	0.0125662	0.0258904
ENSCHIG00000018472	1.02706	-2.23316	0.677503	-3.29616	0.000980172	0.00253176
ENSCHIG00000022114	1.02608	-3.60653	0.698018	-5.16681	2.38119e-07	1.05727e-06
[truncated: 278 more rows]
