# Supplementary material for: Reductive acetogenesis is a dominant process in the ruminant hindgut
Source: Research Square preprint supplement (doi:10.21203/rs.3.rs-4473149/v1), 2024-06-10
Supplement: Supplementary file 11 [file efe0e86ab812b6454ccc43a3.xlsx]

## Sheet: Abundance
		Rumen			Cecum
MAG	Rename	Mean	SD	SEM	Mean	SD	SEM	P-Value	FDR Adj PValue	completeness	contamination	Group	domian	phylum	class	order	family	genus	species
Ce7.9	MAG1	0	0	0	144.567	365.328	91.3319	0.0079	0.0101688	68.59	6.69	Ce	d__Bacteria	p__Firmicutes_A	c__Clostridia	Christensenellales	f__Borkfalkiaceae	g__Scatosoma	s__
Ce7.14	MAG2	0	0	0	195.553	447.888	111.972	0.0171	0.0210099	89.63	2.48	Ce	d__Bacteria	p__Firmicutes_A	c__Clostridia	Oscillospirales	f__CAG-382	g__SIG636	s__SIG636 sp017396825
Ce7.17	MAG3	0	0	0	340.069	419.643	104.911	0.0002	0.000400461	95.3	2.08	Ce	d__Bacteria	p__Bacteroidota	c__Bacteroidia	Bacteroidales	f__Barnesiellaceae	g__Barnesiella_A	s__Barnesiella_A sp017410245
Ce7.24	MAG4	0	0	0	337.388	608.228	152.057	<.0001	0.000161125	90.61	2.28	Ce	d__Bacteria	p__Campylobacterota	c__Campylobacteria	Campylobacterales	f__Campylobacteraceae	g__Campylobacter	s__Campylobacter sp002139875
Ce7.28	MAG5	0	0	0	145.656	265.219	66.3048	0.0079	0.0101688	81.8	4.47	Ce	d__Bacteria	p__Firmicutes_A	c__Clostridia	Oscillospirales	f__Acutalibacteraceae	g__DTU089	s__
Ce7.35	MAG6	0	0	0	188.291	311.722	77.9305	0.0015	0.00216609	81.64	6.65	Ce	d__Bacteria	p__Bacteroidota	c__Bacteroidia	Bacteroidales	f__Bacteroidaceae	g__HGM04593	s__HGM04593 sp017467015
Ce7.44	MAG7	0	0	0	182.441	249.094	62.2735	0.0002	0.000400461	82.38	2.41	Ce	d__Bacteria	p__Firmicutes_A	c__Clostridia	Oscillospirales	f__CAG-382	g__RGIG6353	s__RGIG6353 sp017439965
Ce7.50	MAG8	0	0	0	344.382	991.963	247.991	<.0001	6.30507e-05	94.18	1.64	Ce	d__Bacteria	p__Firmicutes_A	c__Clostridia	Christensenellales	f__Borkfalkiaceae	g__UBA1259	s__
Ce7.59	MAG9	0	0	0	262.324	460.268	115.067	<.0001	8.28023e-06	86.56	7.13	Ce	d__Bacteria	p__Firmicutes_A	c__Clostridia	Christensenellales	f__CAG-314	g__Fimimonas	s__Fimimonas sp017409765
Ce7.67	MAG10	0	0	0	334.169	905.395	226.349	0.0359	0.0419998	73.3	4.49	Ce	d__Bacteria	p__Firmicutes_A	c__Clostridia	Christensenellales	f__UBA1242	g__UBA7862	s__UBA7862 sp017398655
Ce7.69	MAG11	0	0	0	66.2407	264.963	66.2407	0.3173	0.337339	70.79	2.4	Ce	d__Bacteria	p__Firmicutes_A	c__Clostridia	Oscillospirales	f__Acutalibacteraceae	g__SIG607	s__
Ce7.84	MAG12	0	0	0	331.394	283.452	70.8629	<.0001	1.08446e-06	89.66	1.72	Ce	d__Bacteria	p__Firmicutes_A	c__Clostridia	Oscillospirales	f__Butyricicoccaceae	g__SIG471	s__SIG471 sp017441945
Ce7.86	MAG13	0	0	0	66.6288	266.515	66.6288	0.3173	0.337339	74.28	2.91	Ce	d__Bacteria	p__Firmicutes_A	c__Clostridia	Oscillospirales	f__Oscillospiraceae	g__Faecousia	s__
Ce7.96	MAG14	0	0	0	206.785	213.821	53.4552	<.0001	6.30507e-05	76.82	0.61	Ce	d__Bacteria	p__Proteobacteria	c__Alphaproteobacteria	Rs-D84	f__Rs-D84	g__Enterousia	s__Enterousia sp017472065
Ce7.105	MAG15	0	0	0	230.243	636.763	159.191	0.0737	0.0837988	64.17	2.96	Ce	d__Bacteria	p__Firmicutes_A	c__Clostridia	Oscillospirales	f__Acutalibacteraceae	g__CAG-964	s__
Ce7.110	MAG16	0	0	0	287.357	393.381	98.3453	<.0001	8.28023e-06	74.85	1.34	Ce	d__Bacteria	p__Firmicutes_A	c__Clostridia	Oscillospirales	f__QAMX01	g__SIG499	s__SIG499 sp015067715
Ce7.129	MAG17	0	0	0	158.592	371.115	92.7786	0.0035	0.00478424	56.73	0.29	Ce	d__Bacteria	p__Deferribacterota	c__Deferribacteres	Deferribacterales	f__Mucispirillaceae	g__	s__
Ce7.131	MAG18	0	0	0	902.515	486.215	121.554	<.0001	1.08446e-06	95.28	0.06	Ce	d__Bacteria	p__Firmicutes_A	c__Clostridia	Oscillospirales	f__Ruminococcaceae	g__UBA3855	s__
Ce7.141	MAG19	0	0	0	218.675	284.997	71.2492	<.0001	2.90589e-06	90.46	5.13	Ce	d__Bacteria	p__Firmicutes_A	c__Clostridia	Oscillospirales	f__Ruminococcaceae	g__RGIG3102	s__
Ce7.150	MAG20	64.0572	115.901	28.9754	5994.94	20383.3	5095.83	0.0047	0.00633155	91.57	5.06	Ce	d__Bacteria	p__Firmicutes	c__Bacilli	RF39	f__UBA660	g__CAG-1000	s__
Ce7.159	MAG21	239.01	363.113	90.7783	352.678	437.162	109.291	0.1977	0.215654	72.74	3.74	Ce	d__Archaea	p__Methanobacteriota	c__Methanobacteria	Methanobacteriales	f__Methanobacteriaceae	g__Methanobrevibacter_A	s__Methanobrevibacter_A sp017434525
Ce7.165	MAG22	0	0	0	2072.21	2089.72	522.429	<.0001	1.08446e-06	75.1	10	Ce	d__Bacteria	p__Firmicutes_A	c__Clostridia	Oscillospirales	f__Oscillospiraceae	g__Faecousia	s__
Ce7.170	MAG23	14.4472	57.7887	14.4472	1647.5	2637.11	659.276	<.0001	1.48978e-06	92	2.91	Ce	d__Bacteria	p__Firmicutes	c__Bacilli	RF39	f__UBA660	g__CAG-877	s__
Ce7.244	MAG24	0	0	0	482.749	1636.41	409.103	0.0015	0.00216609	95.71	1.4	Ce	d__Bacteria	p__Firmicutes_A	c__Clostridia	Oscillospirales	f__Acutalibacteraceae	g__CAG-177	s__CAG-177 sp017938985
Ce7.400	MAG25	0	0	0	851.245	1301.27	325.317	<.0001	0.000161125	93.41	6.99	Ce	d__Bacteria	p__Firmicutes_A	c__Clostridia	Oscillospirales	f__Ruminococcaceae	g__UMGS1668	s__UMGS1668 sp017436125
Ce7.402	MAG26	0	0	0	256.379	690.385	172.596	0.0171	0.0210099	88.03	0.67	Ce	d__Bacteria	p__Firmicutes_A	c__Clostridia	Oscillospirales	f__CAG-272	g__RGIG7300	s__RGIG7300 sp015065105
Ce7.414	MAG27	0	0	0	1336.68	2059.93	514.982	<.0001	8.28023e-06	78.14	4.87	Ce	d__Bacteria	p__Firmicutes_A	c__Clostridia	Oscillospirales	f__CAG-272	g__SIG701	s__
Ce7.422	MAG28	0	0	0	105.141	382.668	95.667	0.1508	0.165656	96.42	0.67	Ce	d__Bacteria	p__Firmicutes_A	c__Clostridia	UMGS1840	f__UMGS1840	g__SIG452	s__
Ce7.425	MAG29	0	0	0	509.057	353.618	88.4045	<.0001	1.08446e-06	72.48	0.89	Ce	d__Bacteria	p__Firmicutes_A	c__Clostridia	Oscillospirales	f__Ruminococcaceae	g__Negativibacillus	s__Negativibacillus sp017439985
Ce7.426	MAG30	0	0	0	1502.85	4233.02	1058.25	0.0015	0.00216609	93.74	1.34	Ce	d__Bacteria	p__Firmicutes_A	c__Clostridia	Oscillospirales	f__Acutalibacteraceae	g__UBA737	s__UBA737 sp904502215
Ce7.427	MAG31	0	0	0	429.666	837.602	209.401	0.0079	0.0101688	84.97	0	Ce	d__Bacteria	p__Firmicutes_A	c__Clostridia	Oscillospirales	f__Acutalibacteraceae	g__SIG565	s__
Ce7.430	MAG32	0	0	0	315.87	209.651	52.4128	<.0001	1.08446e-06	58.76	9.75	Ce	d__Bacteria	p__Firmicutes	c__Bacilli	Erysipelotrichales	f__Erysipelotrichaceae	g__RGIG4607	s__
Ce7.432	MAG33	0	0	0	268.478	99.977	24.9943	<.0001	1.08446e-06	66.34	1.9	Ce	d__Bacteria	p__Firmicutes_A	c__Clostridia	Peptostreptococcales	f__Anaerovoracaceae	g__CAG-238	s__CAG-238 sp017436705
Ce7.434	MAG34	0	0	0	447.378	568.115	142.029	<.0001	8.28023e-06	59.12	0	Ce	d__Bacteria	p__Firmicutes_A	c__Clostridia	Oscillospirales	f__CAG-272	g__	s__
Ce7.436	MAG35	0	0	0	229.937	573.784	143.446	0.0359	0.0419998	76.5	1.34	Ce	d__Bacteria	p__Firmicutes_A	c__Clostridia	Oscillospirales	f__Acutalibacteraceae	g__UBA737	s__
Ce7.438	MAG36	0	0	0	370.963	1412.25	353.063	0.0359	0.0419998	85.71	0	Ce	d__Bacteria	p__Proteobacteria	c__Alphaproteobacteria	Rs-D84	f__Rs-D84	g__Enterousia	s__
Ce7.463	MAG37	0	0	0	355.577	818.583	204.646	0.0002	0.000400461	95.75	1.97	Ce	d__Bacteria	p__Firmicutes_A	c__Clostridia	UMGS1810	f__UMGS1810	g__RGIG1828	s__
Ce7.468	MAG38	0	0	0	465.767	759.868	189.967	<.0001	6.30507e-05	91.67	1.85	Ce	d__Bacteria	p__Firmicutes_A	c__Clostridia	UMGS1883	f__UMGS1883	g__UMGS1883	s__
Ce7.474	MAG39	0	0	0	8721.55	16718.5	4179.62	0.0002	0.000400461	92.52	0	Ce	d__Bacteria	p__Verrucomicrobiota	c__Verrucomicrobiae	Verrucomicrobiales	f__Akkermansiaceae	g__Akkermansia	s__Akkermansia sp015062055
Ce7.476	MAG40	0	0	0	242.151	371.572	92.893	<.0001	2.32495e-05	60.49	2.74	Ce	d__Bacteria	p__Firmicutes_A	c__Clostridia	Oscillospirales	f__CAG-272	g__CAG-390	s__
Ce7.477	MAG41	0	0	0	218.993	443.782	110.945	0.0079	0.0101688	89.96	1.57	Ce	d__Bacteria	p__Firmicutes_A	c__Clostridia	Oscillospirales	f__Ruminococcaceae	g__Ruminococcus	s__Ruminococcus sp015066875
Ce7.488	MAG42	0	0	0	1346.88	4346.64	1086.66	0.0006	0.000956857	88.89	2.14	Ce	d__Bacteria	p__Cyanobacteria	c__Vampirovibrionia	Gastranaerophilales	f__Gastranaerophilaceae	g__RGIG2134	s__
Ce7.490	MAG43	0	0	0	958.768	1909.35	477.338	0.0079	0.0101688	83.51	0.67	Ce	d__Bacteria	p__Bacteroidota	c__Bacteroidia	Bacteroidales	f__Rikenellaceae	g__Alistipes	s__Alistipes sp017517705
Ce7.496	MAG44	0	0	0	135.518	321.25	80.3124	0.0171	0.0210099	80.41	0.96	Ce	d__Bacteria	p__Firmicutes_A	c__Clostridia	Oscillospirales	f__Acutalibacteraceae	g__SIG588	s__
Ce7.502	MAG45	0	0	0	152.216	326.738	81.6844	0.0171	0.0210099	85.91	6.42	Ce	d__Bacteria	p__Firmicutes_A	c__Clostridia	Oscillospirales	f__Acutalibacteraceae	g__UBA737	s__
Ce7.503	MAG46	0	0	0	191.863	687.926	171.982	0.0359	0.0419998	71.63	0.84	Ce	d__Bacteria	p__Firmicutes_A	c__Clostridia	Oscillospirales	f__CAG-272	g__RGIG2000	s__
Ce7.506	MAG47	0	0	0	240.799	421.967	105.492	0.0006	0.000956857	87.98	3.91	Ce	d__Bacteria	p__Firmicutes_A	c__Clostridia	Oscillospirales	f__CAG-272	g__SIG710	s__
Ce7.508	MAG48	0	0	0	3930.8	5001.34	1250.34	<.0001	1.08446e-06	97.47	1.36	Ce	d__Bacteria	p__Firmicutes_A	c__Clostridia	Lachnospirales	f__Lachnospiraceae	g__HGM12587	s__
Ce7.511	MAG49	0	0	0	1152.5	967.577	241.894	<.0001	1.08446e-06	80.38	5.34	Ce	d__Bacteria	p__Firmicutes_C	c__Negativicutes	Acidaminococcales	f__Acidaminococcaceae	g__Phascolarctobacterium_A	s__Phascolarctobacterium_A sp017623055
Ce7.513	MAG50	0	0	0	361.604	1305.65	326.412	0.0079	0.0101688	79.59	1.01	Ce	d__Bacteria	p__Firmicutes_A	c__Clostridia	Christensenellales	f__CAG-917	g__RGIG4097	s__RGIG4097 sp017461985
Ce7.519	MAG51	0	0	0	2101.52	1637.45	409.363	<.0001	1.08446e-06	88.3	5.56	Ce	d__Bacteria	p__Bacteroidota	c__Bacteroidia	Bacteroidales	f__UBA932	g__Cryptobacteroides	s__
Ce7.520	MAG52	0	0	0	387.597	594.69	148.672	<.0001	8.28023e-06	56.03	0	Ce	d__Bacteria	p__Firmicutes_A	c__Clostridia	Oscillospirales	f__Oscillospiraceae	g__Faecousia	s__
Ce7.525	MAG53	0	0	0	615.429	963.876	240.969	0.0002	0.000400461	97.09	0	Ce	d__Bacteria	p__Firmicutes_A	c__Clostridia	Oscillospirales	f__CAG-382	g__UMGS882	s__
Ce7.526	MAG54	0	0	0	519.326	911.747	227.937	0.0015	0.00216609	89.42	1.05	Ce	d__Bacteria	p__Spirochaetota	c__Spirochaetia	Treponematales	f__Treponemataceae	g__RGIG9060	s__RGIG9060 sp017936665
Ce7.535	MAG55	0	0	0	488.087	1294.55	323.638	0.0002	0.000400461	97.04	4.03	Ce	d__Bacteria	p__Firmicutes_A	c__Clostridia	Monoglobales	f__Firm-18	g__UBA1775	s__
Ce7.543	MAG56	192.469	339.211	84.8028	1090.56	985.095	246.274	<.0001	9.07535e-05	60.87	3.73	Ce	d__Bacteria	p__Firmicutes_A	c__Clostridia	TANB77	f__CAG-508	g__UMGS1781	s__
Ce7.545	MAG57	0	0	0	228.729	409.613	102.403	<.0001	0.000161125	89.39	2.51	Ce	d__Bacteria	p__Firmicutes_A	c__Clostridia	Monoglobales	f__Monoglobaceae	g__RGIG8709	s__
Ce7.550	MAG58	0	0	0	548.745	963.967	240.992	<.0001	2.32495e-05	95.67	2.13	Ce	d__Bacteria	p__Spirochaetota	c__GWE2-31-10	GWE2-31-10	f__GWE2-31-10	g__RGIG8597	s__RGIG8597 sp017624275
Ce7.551	MAG59	0	0	0	2166.81	6016.58	1504.14	0.0079	0.0101688	91.56	2.6	Ce	d__Bacteria	p__Bacteroidota	c__Bacteroidia	Bacteroidales	f__Bacteroidaceae	g__HGM04593	s__
Ce7.555	MAG60	0	0	0	488.437	1059.04	264.759	<.0001	0.000161125	74.92	0.95	Ce	d__Bacteria	p__Firmicutes_A	c__Clostridia	TANB77	f__CAG-465	g__UMGS1649	s__
Ce7.557	MAG61	0	0	0	277.517	774.617	193.654	0.0359	0.0419998	94.34	0	Ce	d__Bacteria	p__Bacteroidota	c__Bacteroidia	Bacteroidales	f__Barnesiellaceae	g__Barnesiella_A	s__Barnesiella_A sp017531985
Ce7.560	MAG62	0	0	0	392.239	522.822	130.705	<.0001	8.28023e-06	66.88	1.4	Ce	d__Bacteria	p__Firmicutes_A	c__Clostridia	UBA1212	f__UBA1255	g__Egerieisoma	s__Egerieisoma sp017622825
Ce7.563	MAG63	0	0	0	562.564	863.95	215.988	<.0001	2.32495e-05	94.42	2.33	Ce	d__Bacteria	p__Bacteroidota	c__Bacteroidia	Bacteroidales	f__Tannerellaceae	g__Parabacteroides	s__Parabacteroides distasonis_B
Ce7.568	MAG64	0	0	0	441.195	635.788	158.947	<.0001	2.90589e-06	83.62	1.34	Ce	d__Bacteria	p__Firmicutes_A	c__Clostridia	Oscillospirales	f__CAG-272	g__RGIG3438	s__
Ce7.569	MAG65	0	0	0	85.5571	271.76	67.94	0.0359	0.0419998	63.63	3.15	Ce	d__Bacteria	p__Firmicutes_A	c__Clostridia	Oscillospirales	f__Acutalibacteraceae	g__UBA737	s__
Ce7.574	MAG66	0	0	0	198.426	547.437	136.859	0.0035	0.00478424	91.66	2.2	Ce	d__Bacteria	p__Firmicutes_A	c__Clostridia	Lachnospirales	f__Lachnospiraceae	g__RGIG6307	s__
Ce8.15	MAG67	137.361	549.445	137.361	370.233	1480.93	370.233	0.9642	0.9678	98.43	0.34	Ce	d__Bacteria	p__Firmicutes_A	c__Clostridia	Oscillospirales	f__Acutalibacteraceae	g__Ruminococcus_E	s__
Ce8.17	MAG68	0	0	0	182.006	541.528	135.382	0.0171	0.0210099	97	2.35	Ce	d__Bacteria	p__Firmicutes_A	c__Clostridia	Oscillospirales	f__Ruminococcaceae	g__Firm-04	s__Firm-04 sp016296505
Ce8.18	MAG69	0	0	0	397.237	722.856	180.714	0.0015	0.00216609	97.99	0.34	Ce	d__Bacteria	p__Firmicutes_A	c__Clostridia	Oscillospirales	f__Acutalibacteraceae	g__Ruminococcus_E	s__
Ce8.24	MAG70	0	0	0	184.654	374.727	93.6817	0.0015	0.00216609	91.41	2.01	Ce	d__Bacteria	p__Firmicutes_A	c__Clostridia	UMGS1883	f__UMGS1540	g__SIG447	s__
Ce8.32	MAG71	0	0	0	146.428	361.125	90.2813	0.0171	0.0210099	92.84	0.17	Ce	d__Bacteria	p__Firmicutes_A	c__Clostridia	Oscillospirales	f__Ruminococcaceae	g__Faeciplasma	s__
Ce8.50	MAG72	0	0	0	107.431	368.191	92.0477	0.0737	0.0837988	85.95	1.99	Ce	d__Bacteria	p__Firmicutes_A	c__Clostridia	Oscillospirales	f__CAG-272	g__RGIG2000	s__RGIG2000 sp017399145
Ce8.52	MAG73	0	0	0	205.981	272.541	68.1353	<.0001	2.32495e-05	74.57	5.07	Ce	d__Archaea	p__Halobacteriota	c__Methanomicrobia	Methanomicrobiales	f__Methanocorpusculaceae	g__Methanocorpusculum	s__Methanocorpusculum sp017399555
Ce8.62	MAG74	0	0	0	69.6423	278.569	69.6423	0.3173	0.337339	56.03	3.45	Ce	d__Bacteria	p__Firmicutes	c__Bacilli	Bacillales_B	f__DSM-1321	g__Bacillus_AD	s__
Ce8.64	MAG75	0	0	0	353.314	410.191	102.548	<.0001	8.28023e-06	59.1	2.25	Ce	d__Bacteria	p__Firmicutes	c__Bacilli	RF39	f__UBA660	g__RUG11198	s__
Ce8.70	MAG76	0	0	0	177.091	403.286	100.822	0.0171	0.0210099	95	3.68	Ce	d__Bacteria	p__Bacteroidota	c__Bacteroidia	Bacteroidales	f__Rikenellaceae	g__Alistipes	s__Alistipes sp017410165
Ce8.90	MAG77	0	0	0	805.257	1595.91	398.978	0.0359	0.0419998	89.54	1.99	Ce	d__Bacteria	p__Bacteroidota	c__Bacteroidia	Bacteroidales	f__Bacteroidaceae	g__HGM04593	s__HGM04593 sp017408685
Ce8.93	MAG78	0	0	0	350.003	374.171	93.5427	<.0001	1.08446e-06	83.29	6.07	Ce	d__Bacteria	p__Firmicutes_B	c__Dehalobacteriia	UBA7702	f__UBA7702	g__UBA7702	s__
Ce8.103	MAG79	0	0	0	283.081	165.642	41.4105	<.0001	1.08446e-06	72.87	7.86	Ce	d__Bacteria	p__Firmicutes	c__Bacilli	Erysipelotrichales	f__Erysipelotrichaceae	g__RGIG1896	s__RGIG1896 sp017397025
Ce8.105	MAG80	222.049	261.742	65.4354	169.632	293.118	73.2795	0.1403	0.157633	78.98	6.17	R	d__Bacteria	p__Firmicutes_A	c__Clostridia	Lachnospirales	f__Lachnospiraceae	g__UBA1066	s__UBA1066 sp900317515
Ce8.110	MAG81	0	0	0	124.316	385.967	96.4917	0.0171	0.0210099	96.64	1.51	Ce	d__Bacteria	p__Firmicutes_A	c__Clostridia	Oscillospirales	f__JAAYXM01	g__RGIG7332	s__
Ce8.127	MAG82	0	0	0	758.286	1795.17	448.793	<.0001	6.30507e-05	82.99	3.36	Ce	d__Bacteria	p__Firmicutes_A	c__Clostridia	Oscillospirales	f__Acutalibacteraceae	g__RUG806	s__RUG806 sp017396895
Ce8.132	MAG83	68.6487	24.1869	6.04674	303.766	332.382	83.0955	<.0001	8.28023e-06	99.59	1.78	Ce	d__Bacteria	p__Proteobacteria	c__Alphaproteobacteria	Rhizobiales	f__Xanthobacteraceae	g__Bradyrhizobium	s__
Ce8.133	MAG84	78.4153	32.9869	8.24673	223.098	193.492	48.3731	<.0001	0.000147575	59.19	2.63	Ce	d__Bacteria	p__Bacteroidota	c__Bacteroidia	Chitinophagales	f__Chitinophagaceae	g__Sediminibacterium	s__
Ce8.143	MAG85	195.117	337.059	84.2647	27.1404	98.9354	24.7339	0.046	0.0537196	57.75	0.78	R	d__Bacteria	p__Firmicutes_A	c__Clostridia	Saccharofermentanales	f__Saccharofermentanaceae	g__Saccharofermentans	s__Saccharofermentans sp902782125
Ce8.148	MAG86	28.13	112.52	28.13	341.188	296.769	74.1922	<.0001	8.61278e-05	64.77	5.79	Ce	d__Bacteria	p__Firmicutes_A	c__Clostridia	Oscillospirales	f__CAG-272	g__UMGS1696	s__
Ce8.153	MAG87	0	0	0	1576.7	4374.72	1093.68	<.0001	2.90589e-06	62.24	6.9	Ce	d__Bacteria	p__Firmicutes_A	c__Clostridia	Christensenellales	f__CAG-74	g__Limiplasma	s__Limiplasma sp017501255
Ce8.157	MAG88	0	0	0	1363.09	2986.56	746.639	0.0035	0.00478424	95.75	0.67	Ce	d__Bacteria	p__Firmicutes_A	c__Clostridia	Oscillospirales	f__CAG-382	g__RGIG6353	s__
Ce8.160	MAG89	0	0	0	146.728	95.862	23.9655	<.0001	1.08446e-06	55.62	0	Ce	d__Bacteria	p__Firmicutes	c__Bacilli	Erysipelotrichales	f__Erysipelotrichaceae	g__SIG230	s__SIG230 sp015058845
Ce8.184	MAG90	0	0	0	1756.65	5386.15	1346.54	0.0006	0.000956857	86.98	2.01	Ce	d__Bacteria	p__Firmicutes_A	c__Clostridia	Oscillospirales	f__Acutalibacteraceae	g__Ruminococcus_E	s__Ruminococcus_E sp017481395
Ce8.190	MAG91	0	0	0	395.412	729.307	182.327	<.0001	8.28023e-06	70.52	2.59	Ce	d__Bacteria	p__Firmicutes_A	c__Clostridia	Christensenellales	f__CAG-74	g__SFHK01	s__SFHK01 sp016296675
Ce8.261	MAG92	0	0	0	1076.45	2589.41	647.353	0.0015	0.00216609	96	1.33	Ce	d__Bacteria	p__Firmicutes	c__Bacilli	ML615J-28	f__CAG-313	g__UBA1737	s__
Ce8.353	MAG93	0	0	0	3808.48	10084.3	2521.08	<.0001	1.08446e-06	70.76	1.76	Ce	d__Bacteria	p__Firmicutes_A	c__Clostridia	Oscillospirales	f__Oscillospiraceae	g__Faecousia	s__
Ce8.359	MAG94	0	0	0	1100.17	1582.96	395.741	<.0001	2.32495e-05	98.08	0.96	Ce	d__Bacteria	p__Bacteroidota	c__Bacteroidia	Bacteroidales	f__Rikenellaceae	g__Alistipes	s__Alistipes sp017442365
Ce8.368	MAG95	163.555	162.385	40.5963	572.284	1058.59	264.649	0.1599	0.175552	94.4	5.6	Ce	d__Archaea	p__Methanobacteriota	c__Methanobacteria	Methanobacteriales	f__Methanobacteriaceae	g__Methanobrevibacter_A	s__Methanobrevibacter_A sp017434525
Ce8.400	MAG96	0	0	0	1783.13	1574.36	393.59	<.0001	1.08446e-06	96.42	2.99	Ce	d__Bacteria	p__Firmicutes_A	c__Clostridia	UBA1381	f__UBA1381	g__RGIG1988	s__
Ce8.419	MAG97	17.1016	68.4065	17.1016	871.955	1765.34	441.335	<.0001	6.64653e-06	88	4	Ce	d__Bacteria	p__Firmicutes	c__Bacilli	RF39	f__UBA660	g__RUG591	s__
Ce8.423	MAG98	20.161	61.7529	15.4382	111.297	230.713	57.6782	0.0184	0.0225661	55.67	7.33	Ce	d__Bacteria	p__Firmicutes_A	c__Clostridia	Peptostreptococcales	f__Anaerovoracaceae	g__RUG13409	s__
Ce8.454	MAG99	0	0	0	571.99	803.254	200.813	<.0001	2.90589e-06	96.55	0	Ce	d__Bacteria	p__Planctomycetota	c__Planctomycetia	Pirellulales	f__Thermoguttaceae	g__RUG369	s__
Ce8.459	MAG100	0	0	0	526.358	688.969	172.242	0.0006	0.000956857	94.76	0.03	Ce	d__Bacteria	p__Bacteroidota	c__Bacteroidia	Bacteroidales	f__UBA932	g__Egerieousia	s__
Ce8.460	MAG101	0	0	0	465.288	824.116	206.029	<.0001	2.32495e-05	96.66	1.34	Ce	d__Bacteria	p__Firmicutes_A	c__Clostridia	Christensenellales	f__CAG-74	g__RUG563	s__RUG563 sp017437265
Ce8.461	MAG102	0	0	0	250.2	945.124	236.281	0.1508	0.165656	90.38	1.51	Ce	d__Bacteria	p__Firmicutes_A	c__Clostridia	Oscillospirales	f__Acutalibacteraceae	g__RGIG3009	s__
Ce8.465	MAG103	0	0	0	407.369	921.81	230.452	0.0006	0.000956857	81.54	0	Ce	d__Bacteria	p__Firmicutes_A	c__Clostridia	Oscillospirales	f__CAG-272	g__UMGS902	s__
Ce8.468	MAG104	0	0	0	500.346	546.545	136.636	<.0001	1.08446e-06	73.87	1.34	Ce	d__Bacteria	p__Firmicutes_A	c__Clostridia	Oscillospirales	f__Oscillospiraceae	g__HGM13010	s__HGM13010 sp017415945
Ce8.472	MAG105	0	0	0	386.821	762.32	190.58	<.0001	0.000161125	75.62	1.57	Ce	d__Bacteria	p__Firmicutes_A	c__Clostridia	Oscillospirales	f__Acutalibacteraceae	g__UBA6857	s__UBA6857 sp017396515
Ce8.479	MAG106	0	0	0	138.991	319.883	79.9709	0.0171	0.0210099	67.12	4.97	Ce	d__Bacteria	p__Firmicutes_A	c__Clostridia	Oscillospirales	f__CAG-272	g__RUG14199	s__
Ce8.484	MAG107	0	0	0	303.758	446.414	111.603	<.0001	8.28023e-06	76.25	1.63	Ce	d__Bacteria	p__Firmicutes_A	c__Clostridia	Christensenellales	f__MGBC116941	g__MGBC116941	s__
Ce8.491	MAG108	0	0	0	869.914	1014.41	253.603	<.0001	1.08446e-06	62.29	4.59	Ce	d__Bacteria	p__Firmicutes_A	c__Clostridia	Oscillospirales	f__Oscillospiraceae	g__Faecousia	s__
Ce8.494	MAG109	0	0	0	170.412	659.914	164.979	0.1508	0.165656	78.75	0	Ce	d__Bacteria	p__Firmicutes_A	c__Clostridia	Oscillospirales	f__Acutalibacteraceae	g__SFWF01	s__
Ce8.495	MAG110	0	0	0	377.022	521.772	130.443	<.0001	8.28023e-06	84.85	1.08	Ce	d__Bacteria	p__Proteobacteria	c__Alphaproteobacteria	UBA3830	f__UBA3830	g__	s__
Ce8.496	MAG111	0	0	0	97.1365	377.199	94.2997	0.1508	0.165656	80.61	7.21	Ce	d__Bacteria	p__Firmicutes_A	c__Clostridia	Christensenellales	f__UBA1242	g__	s__
Ce8.498	MAG112	0	0	0	188.603	293.327	73.3318	<.0001	0.000161125	66.79	5.94	Ce	d__Bacteria	p__Firmicutes_A	c__Clostridia	Oscillospirales	f__UBA644	g__HGM12619	s__HGM12619 sp017441125
Ce8.505	MAG113	0	0	0	282.082	265.766	66.4415	<.0001	2.32495e-05	52.04	0.13	Ce	d__Bacteria	p__Firmicutes_A	c__Clostridia	Oscillospirales	f__Ruminococcaceae	g__Ruminococcus_D	s__
Ce8.514	MAG114	43.0312	94.8717	23.7179	173.295	516.823	129.206	0.8349	0.853029	63.17	0.85	Ce	d__Bacteria	p__Patescibacteria	c__Saccharimonadia	Saccharimonadales	f__Nanosyncoccaceae	g__Nanosyncoccus	s__
Ce8.521	MAG115	131.022	175.286	43.8214	187.685	355.294	88.8234	0.9387	0.949947	54.98	0.85	Ce	d__Bacteria	p__Patescibacteria	c__Saccharimonadia	Saccharimonadales	f__Nanosyncoccaceae	g__Nanosyncoccus	s__
Ce8.553	MAG116	0	0	0	388.791	417.459	104.365	<.0001	2.32495e-05	93.1	7.37	Ce	d__Bacteria	p__Firmicutes_A	c__Clostridia	Oscillospirales	f__CAG-272	g__Flemingibacterium	s__
Ce8.555	MAG117	624.726	2122.53	530.633	159.739	607.544	151.886	0.6334	0.655034	95.48	1.64	R	d__Bacteria	p__Firmicutes_A	c__Clostridia	Lachnospirales	f__Lachnospiraceae	g__UBA3766	s__UBA3766 sp900313265
Ce8.559	MAG118	1346.35	2546.67	636.668	561.199	1501.65	375.412	0.0247	0.030073	95.45	2.16	R	d__Bacteria	p__Firmicutes_A	c__Clostridia	Christensenellales	f__CAG-74	g__GCA-900199385	s__
Ce8.560	MAG119	0	0	0	3114.34	5086.39	1271.6	<.0001	1.08446e-06	93.28	0	Ce	d__Bacteria	p__Bacteroidota	c__Bacteroidia	Bacteroidales	f__F082	g__Limimorpha	s__Limimorpha sp015061365
Ce8.570	MAG120	248.936	521.609	130.402	194.821	580.175	145.044	0.9645	0.9678	98.66	2.01	R	d__Bacteria	p__Firmicutes_A	c__Clostridia	Oscillospirales	f__Acutalibacteraceae	g__Ruminococcus_E	s__
Ce8.571	MAG121	0	0	0	1224.59	2015.88	503.97	0.0002	0.000400461	93.96	1.13	Ce	d__Bacteria	p__Bacteroidota	c__Bacteroidia	Bacteroidales	f__Barnesiellaceae	g__Barnesiella_A	s__Barnesiella_A sp017410245
Ce8.572	MAG122	0	0	0	276.468	419.083	104.771	<.0001	8.28023e-06	77.59	5.96	Ce	d__Bacteria	p__Firmicutes_A	c__Clostridia	Oscillospirales	f__CAG-272	g__RGIG7300	s__
Ce8.578	MAG123	0	0	0	2088.79	2119.46	529.866	<.0001	1.08446e-06	83.66	6.17	Ce	d__Bacteria	p__Firmicutes_A	c__Clostridia	Oscillospirales	f__Oscillospiraceae	g__Faecousia	s__
Ce8.580	MAG124	0	0	0	1113.46	1998.44	499.61	<.0001	8.28023e-06	84.99	1.87	Ce	d__Bacteria	p__Firmicutes_A	c__Clostridia	Lachnospirales	f__Lachnospiraceae	g__Faecalimonas	s__
Ce8.581	MAG125	0	0	0	1967.13	6073.86	1518.46	<.0001	1.08446e-06	88.98	4.03	Ce	d__Bacteria	p__Firmicutes_A	c__Clostridia	Oscillospirales	f__Oscillospiraceae	g__Faecousia	s__
Ce8.587	MAG126	0	0	0	158.126	449.265	112.316	0.0171	0.0210099	77.06	0.67	Ce	d__Bacteria	p__Firmicutes_A	c__Clostridia	Oscillospirales	f__CAG-382	g__UMGS1052	s__
Ce8.590	MAG127	0	0	0	1220.79	980.56	245.14	<.0001	1.08446e-06	79.87	5.11	Ce	d__Bacteria	p__Firmicutes_A	c__Clostridia	Lachnospirales	f__Lachnospiraceae	g__RGIG8767	s__RGIG8767 sp017621115
Ce8.596	MAG128	0	0	0	1193.37	2022.98	505.745	<.0001	1.08446e-06	76.69	9.53	Ce	d__Bacteria	p__Firmicutes_A	c__Clostridia	Oscillospirales	f__Oscillospiraceae	g__Faecousia	s__
Ce8.598	MAG129	0	0	0	901.797	1161.31	290.327	<.0001	1.08446e-06	92.54	7.26	Ce	d__Bacteria	p__Firmicutes_A	c__Clostridia	Christensenellales	f__CAG-74	g__Limiplasma	s__
Ce8.601	MAG130	0	0	0	1072.85	1462.81	365.702	0.0002	0.000400461	94.04	5.62	Ce	d__Bacteria	p__Firmicutes	c__Bacilli	RF39	f__UBA660	g__Coprovivens	s__Coprovivens sp015059245
Ce8.602	MAG131	0	0	0	494.349	927.624	231.906	<.0001	6.30507e-05	95.22	4.32	Ce	d__Bacteria	p__Firmicutes_A	c__Clostridia	UBA1381	f__UBA1381	g__HGM11525	s__
Ce8.603	MAG132	0	0	0	431.21	653.984	163.496	<.0001	2.32495e-05	86.84	6.72	Ce	d__Bacteria	p__Firmicutes_A	c__Clostridia	Lachnospirales	f__Lachnospiraceae	g__RGIG6307	s__
Ce8.604	MAG133	0	0	0	207.185	468.899	117.225	0.0079	0.0101688	89.23	2.18	Ce	d__Bacteria	p__Firmicutes_A	c__Clostridia	Oscillospirales	f__Acutalibacteraceae	g__UBA737	s__UBA737 sp017437005
Ce8.607	MAG134	0	0	0	981.59	577.549	144.387	<.0001	1.08446e-06	62.07	8.62	Ce	d__Bacteria	p__Firmicutes_A	c__Clostridia	Oscillospirales	f__Oscillospiraceae	g__CAG-83	s__
Ce8.608	MAG135	0	0	0	490.127	520.444	130.111	<.0001	1.08446e-06	66.23	1.46	Ce	d__Bacteria	p__Firmicutes_A	c__Clostridia	Lachnospirales	f__Lachnospiraceae	g__Mediterraneibacter_A	s__
Ce8.611	MAG136	0	0	0	667.751	1648.05	412.011	<.0001	2.90589e-06	87.88	7.15	Ce	d__Bacteria	p__Firmicutes	c__Bacilli	RF39	f__UBA660	g__SIG208	s__
Ce8.613	MAG137	0	0	0	328.458	465.86	116.465	0.0006	0.000956857	82.39	1.34	Ce	d__Bacteria	p__Firmicutes_A	c__Clostridia	Oscillospirales	f__Oscillospiraceae	g__SIG483	s__SIG483 sp015068035
Ce8.614	MAG138	0	0	0	716.958	740.19	185.047	<.0001	2.90589e-06	62.34	2.89	Ce	d__Bacteria	p__Bacteroidota	c__Bacteroidia	Bacteroidales	f__Bacteroidaceae	g__Phocaeicola_A	s__Phocaeicola_A sp017521285
Ce8.618	MAG139	88.2121	137.595	34.3988	111.07	287.385	71.8462	0.4089	0.429884	79.21	1.11	Ce	d__Bacteria	p__Actinobacteriota	c__Coriobacteriia	Coriobacteriales	f__Atopobiaceae	g__UBA1367	s__
Ce8.621	MAG140	0	0	0	1399.95	2404.07	601.018	<.0001	1.08446e-06	94.62	3.04	Ce	d__Bacteria	p__Firmicutes_A	c__Clostridia	Oscillospirales	f__Oscillospiraceae	g__Faecousia	s__
Ce8.623	MAG141	0	0	0	510.162	2000.89	500.222	0.1508	0.165656	85.23	0.34	Ce	d__Bacteria	p__Firmicutes_A	c__Clostridia	Oscillospirales	f__Acutalibacteraceae	g__UMGS172	s__
Ce8.624	MAG142	0	0	0	340.897	328.295	82.0738	<.0001	2.90589e-06	97.74	1.21	Ce	d__Bacteria	p__Firmicutes_A	c__Clostridia	Christensenellales	f__CAG-138	g__UBA1685	s__UBA1685 sp017435905
Ce8.625	MAG143	0	0	0	91.4144	345.031	86.2579	0.1508	0.165656	87.13	5.99	Ce	d__Bacteria	p__Firmicutes_A	c__Clostridia	Oscillospirales	f__CAG-272	g__SIG710	s__SIG710 sp015063495
Ce8.626	MAG144	0	0	0	782.606	1418.66	354.665	<.0001	0.000161125	76.91	0	Ce	d__Bacteria	p__Firmicutes_A	c__Clostridia	Oscillospirales	f__Acutalibacteraceae	g__CAG-488	s__CAG-488 sp017415025
Ce8.630	MAG145	260.846	729.607	182.402	377.399	1260.62	315.155	0.7029	0.723166	72	0	Ce	d__Bacteria	p__Firmicutes	c__Bacilli	RF39	f__UBA660	g__UBA3789	s__
Ce8.631	MAG146	0	0	0	399.515	772.952	193.238	0.0015	0.00216609	88.03	0.92	Ce	d__Bacteria	p__Firmicutes_A	c__Clostridia	Oscillospirales	f__CAG-272	g__SIG710	s__
Ce8.634	MAG147	0	0	0	735.328	540.857	135.214	<.0001	1.08446e-06	57.52	1.72	Ce	d__Bacteria	p__Bacteroidota	c__Bacteroidia	Bacteroidales	f__UBA932	g__Cryptobacteroides	s__
Ce8.637	MAG148	0	0	0	92.3302	346.069	86.5174	0.1508	0.165656	62.8	1.72	Ce	d__Bacteria	p__Firmicutes_A	c__Clostridia	Oscillospirales	f__Acutalibacteraceae	g__UMGS1976	s__UMGS1976 sp017409475
Ce8.641	MAG149	0	0	0	511.641	1171.9	292.975	0.0006	0.000956857	98.3	7.38	Ce	d__Bacteria	p__Firmicutes_A	c__Clostridia	Oscillospirales	f__Acutalibacteraceae	g__UBA6857	s__
Ce8.647	MAG150	0	0	0	294.197	1176.79	294.197	0.3173	0.337339	80.09	2.03	Ce	d__Bacteria	p__Firmicutes_A	c__Clostridia	Oscillospirales	f__Acutalibacteraceae	g__Ruminococcus_E	s__
Ce8.654	MAG151	0	0	0	1115.11	687.491	171.873	<.0001	1.08446e-06	71.56	1.52	Ce	d__Bacteria	p__Firmicutes_C	c__Negativicutes	Acidaminococcales	f__Acidaminococcaceae	g__Phascolarctobacterium_A	s__Phascolarctobacterium_A sp017623055
Ce8.656	MAG152	0	0	0	1031.48	1463.4	365.849	0.0002	0.000400461	95.41	2.76	Ce	d__Bacteria	p__Firmicutes_A	c__Clostridia	Oscillospirales	f__Acutalibacteraceae	g__SIG565	s__
Ce8.658	MAG153	0	0	0	290.445	399.442	99.8606	<.0001	2.32495e-05	51.24	0.89	Ce	d__Bacteria	p__Firmicutes_A	c__Clostridia	Oscillospirales	f__Acutalibacteraceae	g__Ruminococcus_E	s__
Ce8.659	MAG154	0	0	0	1396.86	3413.89	853.472	<.0001	2.90589e-06	81.06	8.99	Ce	d__Bacteria	p__Firmicutes	c__Bacilli	RF39	f__UBA660	g__SIG208	s__
Ce8.660	MAG155	0	0	0	1462.01	1568.86	392.215	<.0001	1.08446e-06	79.72	4.66	Ce	d__Bacteria	p__Firmicutes_A	c__Clostridia	Oscillospirales	f__Oscillospiraceae	g__Limivicinus	s__Limivicinus sp017398685
Ce8.665	MAG156	0	0	0	182.537	326.362	81.5905	<.0001	2.32495e-05	56.32	3.45	Ce	d__Bacteria	p__Firmicutes_A	c__Clostridia	Christensenellales	f__CAG-74	g__SFHK01	s__
Ce8.669	MAG157	0	0	0	483.25	431.086	107.772	<.0001	2.90589e-06	91.24	0.22	Ce	d__Bacteria	p__Firmicutes_A	c__Clostridia	Oscillospirales	f__CAG-272	g__RGIG2161	s__RGIG2161 sp017408535
Ce8.672	MAG158	0	0	0	405.426	1110.94	277.735	0.0035	0.00478424	96.42	0.67	Ce	d__Bacteria	p__Firmicutes_A	c__Clostridia	Oscillospirales	f__Acutalibacteraceae	g__UBA737	s__UBA737 sp015066445
Ce8.676	MAG159	0	0	0	1277.15	1251.61	312.902	<.0001	1.08446e-06	99.06	4.25	Ce	d__Bacteria	p__Firmicutes	c__Bacilli	Erysipelotrichales	f__Coprobacillaceae	g__Fimiplasma	s__
Ce8.683	MAG160	0	0	0	494.435	735.607	183.902	<.0001	2.90589e-06	72.01	1.11	Ce	d__Bacteria	p__Firmicutes_A	c__Clostridia	Lachnospirales	f__Lachnospiraceae	g__Faecalimonas	s__
Ce8.685	MAG161	379.741	419.056	104.764	800.558	1158.57	289.641	0.3859	0.406905	94.4	4.8	R	d__Archaea	p__Methanobacteriota	c__Methanobacteria	Methanobacteriales	f__Methanobacteriaceae	g__Methanobrevibacter	s__Methanobrevibacter sp902784195
Ce8.686	MAG162	0	0	0	293.576	480.689	120.172	<.0001	8.28023e-06	89.68	2.07	Ce	d__Bacteria	p__Firmicutes_A	c__Clostridia	Oscillospirales	f__CAG-272	g__SIG693	s__
Ce8.687	MAG163	0	0	0	511.109	1690.37	422.593	0.0035	0.00478424	84.76	0	Ce	d__Bacteria	p__Firmicutes_A	c__Clostridia	Oscillospirales	f__Acutalibacteraceae	g__UBA737	s__
Ce9.7	MAG164	0	0	0	117.818	265.309	66.3272	0.0359	0.0419998	58.62	3.02	Ce	d__Bacteria	p__Firmicutes_A	c__Clostridia	Christensenellales	f__UBA1242	g__UBA11490	s__
Ce9.13	MAG165	257.459	112.707	28.1768	775.438	628.575	157.144	<.0001	0.000147575	100	0	Ce	d__Bacteria	p__Bacteroidota	c__Bacteroidia	Chitinophagales	f__Chitinophagaceae	g__Sediminibacterium	s__Sediminibacterium magnilacihabitans
Ce9.16	MAG166	168.818	268.124	67.031	58.7413	134.35	33.5874	0.3355	0.355735	77.95	3.23	R	d__Bacteria	p__Firmicutes_A	c__Clostridia	Saccharofermentanales	f__Saccharofermentanaceae	g__Firm-16	s__Firm-16 sp017428545
Ce9.17	MAG167	0	0	0	121.837	196.657	49.1641	<.0001	0.000161125	60.86	6.19	Ce	d__Bacteria	p__Firmicutes_B	c__Dehalobacteriia	UBA7702	f__UBA7702	g__UBA7702	s__
Ce9.22	MAG168	0	0	0	213.941	221.772	55.4429	<.0001	2.32495e-05	83.54	1.75	Ce	d__Bacteria	p__Firmicutes_A	c__Clostridia	Oscillospirales	f__Acutalibacteraceae	g__RUG11462	s__
Ce9.26	MAG169	0	0	0	366.676	295.119	73.7797	<.0001	2.90589e-06	83.18	7.58	Ce	d__Bacteria	p__Firmicutes_A	c__Clostridia	Christensenellales	f__CAG-314	g__SFEB01	s__
Ce9.28	MAG170	270.971	205.391	51.3479	149.679	180.892	45.2231	0.0237	0.0288654	87.38	4.05	R	d__Bacteria	p__Firmicutes_A	c__Clostridia	Lachnospirales	f__Lachnospiraceae	g__CAG-791	s__CAG-791 sp902789735
Ce9.33	MAG171	0	0	0	91.0101	217.049	54.2623	0.0035	0.00478424	87.42	4.7	Ce	d__Bacteria	p__Firmicutes_A	c__Clostridia	Oscillospirales	f__Acutalibacteraceae	g__Ruminococcus_E	s__
Ce9.41	MAG172	0	0	0	344.481	358.645	89.6613	<.0001	0.000161125	90.89	3.17	Ce	d__Bacteria	p__Firmicutes_A	c__Clostridia	Oscillospirales	f__CAG-382	g__UMGS1052	s__
Ce9.46	MAG173	0	0	0	61.5104	180.087	45.0217	0.0171	0.0210099	63.48	2.85	Ce	d__Bacteria	p__Firmicutes_A	c__Clostridia	Christensenellales	f__Borkfalkiaceae	g__RGIG3732	s__RGIG3732 sp017501205
Ce9.48	MAG174	0	0	0	558.887	1815.79	453.947	0.1508	0.165656	99.43	0	Ce	d__Bacteria	p__Bacteroidota	c__Bacteroidia	Bacteroidales	f__Muribaculaceae	g__CAG-485	s__
Ce9.49	MAG175	0	0	0	96.358	192.745	48.1862	0.0079	0.0101688	62.1	0.73	Ce	d__Bacteria	p__Firmicutes_A	c__Clostridia	Oscillospirales	f__CAG-382	g__SIG622	s__
Ce9.55	MAG176	133.647	257.521	64.3802	171.636	292.23	73.0576	0.8284	0.847272	66.48	2.01	Ce	d__Bacteria	p__Firmicutes_A	c__Clostridia	Oscillospirales	f__Acutalibacteraceae	g__RUG714	s__RUG714 sp900321665
Ce9.57	MAG177	0	0	0	173.792	350.927	87.7319	0.0171	0.0210099	90.08	7.01	Ce	d__Bacteria	p__Firmicutes_A	c__Clostridia	Oscillospirales	f__Acutalibacteraceae	g__UBA737	s__UBA737 sp017437005
Ce9.58	MAG178	0	0	0	86.4804	221.679	55.4197	0.0171	0.0210099	78.54	1.46	Ce	d__Bacteria	p__Firmicutes_A	c__Clostridia	Christensenellales	f__Borkfalkiaceae	g__UBA10281	s__UBA10281 sp017396365
Ce9.62	MAG179	0	0	0	195.48	220.57	55.1425	<.0001	2.32495e-05	63.26	1.34	Ce	d__Bacteria	p__Firmicutes_A	c__Clostridia	Oscillospirales	f__UBA644	g__RGIG995	s__
Ce9.66	MAG180	0	0	0	151.738	416.442	104.111	0.0737	0.0837988	72.94	6.18	Ce	d__Bacteria	p__Bacteroidota	c__Bacteroidia	Bacteroidales	f__Rikenellaceae	g__Alistipes	s__Alistipes sp017436185
Ce9.69	MAG181	0	0	0	770.05	974.657	243.664	<.0001	2.90589e-06	95.7	1.61	Ce	d__Bacteria	p__Firmicutes_A	c__Clostridia	Christensenellales	f__CAG-74	g__SFHK01	s__
Ce9.77	MAG182	0	0	0	137.056	232.993	58.2483	0.0006	0.000956857	50.47	3.45	Ce	d__Bacteria	p__Firmicutes_A	c__Clostridia	Oscillospirales	f__Acutalibacteraceae	g__UBA6857	s__UBA6857 sp017436375
Ce9.81	MAG183	0	0	0	224.428	359.067	89.7667	0.0015	0.00216609	76.57	0.64	Ce	d__Bacteria	p__Bacteroidota	c__Bacteroidia	Bacteroidales	f__Rikenellaceae	g__Alistipes	s__Alistipes sp017399485
Ce9.87	MAG184	0	0	0	196.188	113.876	28.4691	<.0001	1.08446e-06	60.41	1.44	Ce	d__Bacteria	p__Firmicutes_A	c__Clostridia	Peptostreptococcales	f__Anaerovoracaceae	g__QAKD01	s__QAKD01 sp015058155
Ce9.95	MAG185	0	0	0	133.846	234.118	58.5296	0.0015	0.00216609	65.2	2.43	Ce	d__Bacteria	p__Firmicutes_A	c__Clostridia	Christensenellales	f__Borkfalkiaceae	g__UBA1259	s__
Ce9.98	MAG186	0	0	0	204.478	142.969	35.7424	<.0001	2.90589e-06	89.82	5.48	Ce	d__Bacteria	p__Firmicutes_A	c__Clostridia	Christensenellales	f__CAG-74	g__RUG563	s__RUG563 sp015056015
Ce9.103	MAG187	164.281	124.457	31.1143	159.214	175.815	43.9537	0.623	0.644929	60.64	6.7	Ce	d__Bacteria	p__Firmicutes	c__Bacilli	Erysipelotrichales	f__Erysipelotrichaceae	g__RUG521	s__RUG521 sp017516045
Ce9.119	MAG188	0	0	0	133.837	279.554	69.8885	0.0079	0.0101688	68.6	2.01	Ce	d__Bacteria	p__Firmicutes_A	c__Clostridia	Oscillospirales	f__Acutalibacteraceae	g__UMGS172	s__UMGS172 sp017416345
Ce9.122	MAG189	0	0	0	673.744	802.51	200.628	<.0001	2.90589e-06	93.34	2.39	Ce	d__Bacteria	p__Firmicutes_A	c__Clostridia	Oscillospirales	f__Oscillospiraceae	g__Faecousia	s__
Ce9.123	MAG190	62.6833	37.7462	9.43655	213.295	229.427	57.3567	0.0037	0.00497295	84.82	1.32	Ce	d__Bacteria	p__Proteobacteria	c__Gammaproteobacteria	Xanthomonadales	f__Rhodanobacteraceae	g__Rhodanobacter	s__Rhodanobacter sp001617365
Ce9.129	MAG191	0	0	0	258.546	181.14	45.285	<.0001	2.90589e-06	58.18	0.96	Ce	d__Bacteria	p__Firmicutes_A	c__Clostridia	Monoglobales	f__Firm-18	g__	s__
Ce9.134	MAG192	0	0	0	1651.23	3047.16	761.789	<.0001	2.32495e-05	96.91	1.68	Ce	d__Bacteria	p__Firmicutes_A	c__Clostridia	Christensenellales	f__CAG-74	g__RUG563	s__RUG563 sp017437265
Ce9.147	MAG193	0	0	0	6765.32	17788.2	4447.05	<.0001	6.30507e-05	93.2	6.12	Ce	d__Bacteria	p__Verrucomicrobiota	c__Verrucomicrobiae	Verrucomicrobiales	f__Akkermansiaceae	g__Akkermansia	s__Akkermansia sp015061985
Ce9.160	MAG194	0	0	0	980.436	3921.74	980.436	0.3173	0.337339	97.65	1.65	Ce	d__Bacteria	p__Firmicutes_C	c__Negativicutes	Acidaminococcales	f__Acidaminococcaceae	g__Phascolarctobacterium_A	s__Phascolarctobacterium_A sp900553055
Ce9.164	MAG195	0	0	0	239.795	520.288	130.072	0.0006	0.000956857	97.37	1.68	Ce	d__Bacteria	p__Bacteroidota	c__Bacteroidia	Bacteroidales	f__Rikenellaceae	g__Alistipes	s__Alistipes sp017624955
Ce9.167	MAG196	0	0	0	1854.52	4029.42	1007.36	<.0001	6.30507e-05	87.7	1.34	Ce	d__Bacteria	p__Firmicutes_A	c__Clostridia	Oscillospirales	f__Acutalibacteraceae	g__RUG806	s__RUG806 sp017396895
Ce9.214	MAG197	0	0	0	2948.16	2665.55	666.388	<.0001	1.08446e-06	57.76	5.17	Ce	d__Bacteria	p__Firmicutes_A	c__Clostridia	Oscillospirales	f__Oscillospiraceae	g__Faecousia	s__
Ce9.215	MAG198	0	0	0	1241.68	1827.6	456.901	<.0001	2.90589e-06	72.71	5.84	Ce	d__Bacteria	p__Firmicutes_A	c__Clostridia	Lachnospirales	f__Lachnospiraceae	g__RGIG6307	s__RGIG6307 sp017521985
Ce9.315	MAG199	0	0	0	148.323	178.489	44.6223	<.0001	0.000161125	50	3.45	Ce	d__Bacteria	p__Firmicutes_A	c__Clostridia	Oscillospirales	f__Acutalibacteraceae	g__Ruminococcus_E	s__
Ce9.358	MAG200	0	0	0	641.277	1197.53	299.383	<.0001	0.000161125	95.27	2.52	Ce	d__Bacteria	p__Bacteroidota	c__Bacteroidia	Bacteroidales	f__Rikenellaceae	g__Alistipes	s__Alistipes sp017465055
Ce9.359	MAG201	0	0	0	1111.11	925.924	231.481	<.0001	1.08446e-06	63.47	6.95	Ce	d__Bacteria	p__Firmicutes_A	c__Clostridia	Oscillospirales	f__Ruminococcaceae	g__RGIG3102	s__
Ce9.378	MAG202	0	0	0	326.823	381.803	95.4509	<.0001	2.90589e-06	69.6	3.3	Ce	d__Bacteria	p__Planctomycetota	c__Planctomycetia	Pirellulales	f__Thermoguttaceae	g__RUG369	s__
Ce9.437	MAG203	0	0	0	352.125	732.399	183.1	0.0006	0.000956857	90.55	3.48	Ce	d__Bacteria	p__Firmicutes_A	c__Clostridia	Oscillospirales	f__Acutalibacteraceae	g__UBA737	s__
Ce9.439	MAG204	0	0	0	320.481	966.519	241.63	0.0171	0.0210099	94.24	0.13	Ce	d__Bacteria	p__Firmicutes_A	c__Clostridia	Oscillospirales	f__Acutalibacteraceae	g__UBA737	s__
Ce9.443	MAG205	0	0	0	800.13	1075.76	268.941	<.0001	0.000161125	95.97	1.65	Ce	d__Bacteria	p__Firmicutes_A	c__Clostridia	Oscillospirales	f__Oscillospiraceae	g__SIG483	s__SIG483 sp015068035
Ce9.444	MAG206	0	0	0	1101.03	3232.88	808.22	0.0359	0.0419998	94.98	0.72	Ce	d__Bacteria	p__Bacteroidota	c__Bacteroidia	Bacteroidales	f__Rikenellaceae	g__Alistipes	s__Alistipes sp017501625
Ce9.447	MAG207	0	0	0	767.691	662.298	165.574	<.0001	1.08446e-06	84.56	1.96	Ce	d__Bacteria	p__Firmicutes_A	c__Clostridia	Oscillospirales	f__Ruminococcaceae	g__Negativibacillus	s__Negativibacillus sp017439985
Ce9.448	MAG208	0	0	0	297.468	527.971	131.993	0.0015	0.00216609	95.64	0.67	Ce	d__Bacteria	p__Firmicutes_A	c__Clostridia	Oscillospirales	f__Acutalibacteraceae	g__Ruminococcus_E	s__
Ce9.450	MAG209	0	0	0	3894.73	4899.97	1224.99	<.0001	0.000161125	96.03	1.68	Ce	d__Bacteria	p__Firmicutes_A	c__Clostridia	Oscillospirales	f__CAG-382	g__	s__
Ce9.453	MAG210	0	0	0	166.328	220.379	55.0948	0.0002	0.000400461	67.11	1.34	Ce	d__Bacteria	p__Firmicutes_A	c__Clostridia	Oscillospirales	f__Acutalibacteraceae	g__UBA737	s__
Ce9.459	MAG211	217.465	166.919	41.7298	103.932	173.308	43.3269	0.0013	0.00204403	64.71	1.41	R	d__Bacteria	p__Firmicutes	c__Bacilli	Erysipelotrichales	f__Erysipelotrichaceae	g__UBA636	s__UBA636 sp900321955
Ce9.466	MAG212	0	0	0	65.5145	245.809	61.4523	0.1508	0.165656	80.69	1.57	Ce	d__Bacteria	p__Firmicutes_A	c__Clostridia	Oscillospirales	f__Ruminococcaceae	g__Faeciplasma	s__
Ce9.468	MAG213	0	0	0	343.94	549.187	137.297	<.0001	2.90589e-06	89.93	0.67	Ce	d__Bacteria	p__Firmicutes_A	c__Clostridia	Oscillospirales	f__Ruminococcaceae	g__	s__
Ce9.469	MAG214	0	0	0	159.479	299.456	74.8641	0.0171	0.0210099	84.16	3.69	Ce	d__Bacteria	p__Firmicutes_A	c__Clostridia	RUG12999	f__RUG12999	g__	s__
Ce9.474	MAG215	0	0	0	530.792	1517.03	379.258	0.0359	0.0419998	56.99	0.38	Ce	d__Bacteria	p__Firmicutes_A	c__Clostridia	Oscillospirales	f__Ruminococcaceae	g__UBA11540	s__
Ce9.479	MAG216	153.22	422.383	105.596	216.428	737.018	184.254	0.7546	0.775336	62.32	1.28	Ce	d__Bacteria	p__Patescibacteria	c__Saccharimonadia	Saccharimonadales	f__Nanosyncoccaceae	g__Nanosyncoccus	s__
Ce9.499	MAG217	95.8449	383.38	95.8449	211.274	611.166	152.791	0.5511	0.573251	99.46	0	Ce	d__Bacteria	p__Bacteroidota	c__Bacteroidia	Bacteroidales	f__Paludibacteraceae	g__UBA1723	s__
Ce9.509	MAG218	0	0	0	1204.55	1148.27	287.067	<.0001	2.90589e-06	92.5	0.74	Ce	d__Bacteria	p__Bacteroidota	c__Bacteroidia	Bacteroidales	f__Bacteroidaceae	g__UBA1189	s__UBA1189 sp017622495
Ce9.511	MAG219	0	0	0	385.909	358.633	89.6584	<.0001	2.90589e-06	85.42	1.34	Ce	d__Bacteria	p__Firmicutes_A	c__Clostridia	Oscillospirales	f__JAAYXM01	g__SIG480	s__
Ce9.514	MAG220	0	0	0	943.796	2398.86	599.716	<.0001	2.32495e-05	94.97	1.75	Ce	d__Bacteria	p__Firmicutes_A	c__Clostridia	Oscillospirales	f__Acutalibacteraceae	g__CAG-488	s__
Ce9.517	MAG221	4491.66	10634.7	2658.68	506.984	1261.41	315.352	0.8429	0.860389	99.65	0	R	d__Bacteria	p__Firmicutes_A	c__Clostridia	Saccharofermentanales	f__Saccharofermentanaceae	g__Saccharofermentans	s__Saccharofermentans sp017427465
Ce9.521	MAG222	0	0	0	1343.16	984.86	246.215	<.0001	1.08446e-06	88.7	8.19	Ce	d__Bacteria	p__Firmicutes_A	c__Clostridia	Oscillospirales	f__Oscillospiraceae	g__Faecousia	s__
Ce9.524	MAG223	0	0	0	321.197	979.712	244.928	0.0035	0.00478424	89.89	0.24	Ce	d__Bacteria	p__Firmicutes_A	c__Clostridia	Oscillospirales	f__Acutalibacteraceae	g__CAG-177	s__
Ce9.532	MAG224	0	0	0	734.79	1940.97	485.243	0.0737	0.0837988	98.11	0.13	Ce	d__Bacteria	p__Bacteroidota	c__Bacteroidia	Bacteroidales	f__Barnesiellaceae	g__Barnesiella_A	s__Barnesiella_A sp017532725
Ce9.534	MAG225	0	0	0	541.083	1868.05	467.013	0.0079	0.0101688	96.58	0.94	Ce	d__Bacteria	p__Firmicutes_A	c__Clostridia	Oscillospirales	f__Acutalibacteraceae	g__Ruminococcus_E	s__
Ce9.535	MAG226	0	0	0	495.402	1099.08	274.771	<.0001	2.90589e-06	79.04	5.59	Ce	d__Bacteria	p__Firmicutes_A	c__Clostridia	Christensenellales	f__CAG-74	g__UBA11524	s__
Ce9.540	MAG227	0	0	0	1176.93	998.951	249.738	<.0001	1.08446e-06	70.26	5.08	Ce	d__Bacteria	p__Firmicutes_A	c__Clostridia	Oscillospirales	f__Oscillospiraceae	g__Limivicinus	s__
Ce9.541	MAG228	0	0	0	689.224	628.408	157.102	<.0001	8.28023e-06	79.51	3.24	Ce	d__Bacteria	p__Firmicutes_A	c__Clostridia	Christensenellales	f__CAG-74	g__SFMI01	s__SFMI01 sp017532155
Ce9.546	MAG229	0	0	0	489.909	1009.49	252.373	<.0001	6.30507e-05	92.23	3.04	Ce	d__Bacteria	p__Firmicutes_A	c__Clostridia	Oscillospirales	f__Acutalibacteraceae	g__UBA737	s__
Ce9.548	MAG230	0	0	0	211.273	361.64	90.41	0.0015	0.00216609	92.09	1.01	Ce	d__Bacteria	p__Firmicutes_A	c__Clostridia	Oscillospirales	f__Acutalibacteraceae	g__CAG-177	s__CAG-177 sp017403185
Ce9.551	MAG231	32.3508	58.6914	14.6729	1677.24	3952.25	988.063	0.0176	0.0216692	94.25	1.08	Ce	d__Bacteria	p__Bacteroidota	c__Bacteroidia	Bacteroidales	f__WCHB1-69	g__UBA1756	s__UBA1756 sp017506175
Ce9.552	MAG232	0	0	0	402.436	1213.78	303.444	0.0015	0.00216609	94.41	1.34	Ce	d__Bacteria	p__Firmicutes_A	c__Clostridia	Oscillospirales	f__CAG-272	g__Avispirillum	s__
Ce9.558	MAG233	0	0	0	1612.19	1043.22	260.805	<.0001	1.08446e-06	82.68	9.46	Ce	d__Bacteria	p__Firmicutes_A	c__Clostridia	Christensenellales	f__CAG-74	g__Ventricola	s__
Ce9.565	MAG234	629.798	1042.2	260.551	768.489	1634.18	408.544	0.9679	0.97075	77.45	0	Ce	d__Bacteria	p__Patescibacteria	c__Saccharimonadia	Saccharimonadales	f__Nanosyncoccaceae	g__Nanosyncoccus	s__
Ce9.570	MAG235	0	0	0	277.737	459.267	114.817	0.0006	0.000956857	94.57	2.03	Ce	d__Bacteria	p__Firmicutes_A	c__Clostridia	Monoglobales	f__Monoglobaceae	g__UMGS1326	s__
Ce9.573	MAG236	0	0	0	2493.07	1424.58	356.146	<.0001	1.08446e-06	82.15	5.43	Ce	d__Bacteria	p__Firmicutes_A	c__Clostridia	Oscillospirales	f__Oscillospiraceae	g__Faecousia	s__
Ce9.576	MAG237	0	0	0	1243.63	1169.76	292.44	<.0001	1.08446e-06	91.72	3.36	Ce	d__Bacteria	p__Firmicutes_A	c__Clostridia	Oscillospirales	f__Ruminococcaceae	g__UMGS1668	s__UMGS1668 sp017847875
Ce9.580	MAG238	0	0	0	442.945	446.041	111.51	<.0001	2.90589e-06	80.88	0	Ce	d__Bacteria	p__Firmicutes_A	c__Clostridia	Oscillospirales	f__CAG-272	g__CAG-390	s__CAG-390 sp017415485
Ce9.585	MAG239	0	0	0	869.753	1434.37	358.593	<.0001	2.32495e-05	68.55	0.02	Ce	d__Bacteria	p__Firmicutes_A	c__Clostridia	TANB77	f__CAG-465	g__UMGS1649	s__
Ce9.587	MAG240	0	0	0	568.09	744.566	186.141	<.0001	2.90589e-06	62.55	0	Ce	d__Bacteria	p__Firmicutes_A	c__Clostridia	Oscillospirales	f__Oscillospiraceae	g__Faecousia	s__
Ce9.591	MAG241	0	0	0	192.88	403.028	100.757	0.0015	0.00216609	81.46	1.69	Ce	d__Bacteria	p__Firmicutes_A	c__Clostridia	Christensenellales	f__UBA1242	g__UBA5489	s__
Ce9.592	MAG242	0	0	0	241.344	226.84	56.71	<.0001	2.90589e-06	76.46	4.76	Ce	d__Bacteria	p__Firmicutes_A	c__Clostridia	Oscillospirales	f__CAG-272	g__UMGS1696	s__
Ce9.600	MAG243	0	0	0	482.904	254.817	63.7043	<.0001	1.08446e-06	76	5.83	Ce	d__Bacteria	p__Firmicutes_A	c__Clostridia	Oscillospirales	f__Oscillospiraceae	g__RGIG6375	s__
Ce9.605	MAG244	204.896	458.392	114.598	173.829	459.363	114.841	1	1	63.6	0.85	Ce	d__Bacteria	p__Patescibacteria	c__Saccharimonadia	Saccharimonadales	f__Nanosyncoccaceae	g__Nanosyncoccus	s__
Ce9.607	MAG245	0	0	0	2429.83	3089.38	772.346	<.0001	1.08446e-06	86.76	5	Ce	d__Bacteria	p__Bacteroidota	c__Bacteroidia	Bacteroidales	f__UBA932	g__Cryptobacteroides	s__Cryptobacteroides sp017398335
Ce9.608	MAG246	0	0	0	781.203	1701.15	425.288	0.0035	0.00478424	94.5	4.68	Ce	d__Bacteria	p__Firmicutes_A	c__Clostridia	Oscillospirales	f__Acutalibacteraceae	g__UMGS172	s__
Ce9.612	MAG247	1014.48	1822.05	455.513	451.418	828.717	207.179	0.2134	0.232456	72.79	1.33	R	d__Bacteria	p__Firmicutes	c__Bacilli	RF39	f__UBA660	g__RUG11198	s__
Ce9.613	MAG248	0	0	0	139.536	370.21	92.5525	0.0737	0.0837988	86.98	2.01	Ce	d__Bacteria	p__Firmicutes_A	c__Clostridia	Oscillospirales	f__Acutalibacteraceae	g__UBA737	s__UBA737 sp017622555
Ce9.618	MAG249	0	0	0	1531.88	1168	292.001	<.0001	1.08446e-06	74.83	2.35	Ce	d__Bacteria	p__Firmicutes_A	c__Clostridia	Lachnospirales	f__Lachnospiraceae	g__Frisingicoccus	s__
Ce9.619	MAG250	19.7966	36.5831	9.14576	1107.43	1126.58	281.644	<.0001	2.89824e-06	73.43	6.6	Ce	d__Bacteria	p__Firmicutes_A	c__Clostridia	Oscillospirales	f__Oscillospiraceae	g__Evtepia	s__Evtepia sp017521345
Ce9.627	MAG251	0	0	0	462.064	339.896	84.9739	<.0001	1.08446e-06	61.48	3.67	Ce	d__Bacteria	p__Firmicutes_A	c__Clostridia	Lachnospirales	f__Lachnospiraceae	g__SZUA-448	s__
Ce9.629	MAG252	0	0	0	288.222	362.48	90.6199	<.0001	2.32495e-05	90.8	1.34	Ce	d__Bacteria	p__Firmicutes_A	c__Clostridia	Oscillospirales	f__Ruminococcaceae	g__RGIG3102	s__RGIG3102 sp017400025
Ce10.26	MAG253	0	0	0	303.244	154.099	38.5247	<.0001	1.08446e-06	75.97	7.33	Ce	d__Bacteria	p__Firmicutes_A	c__Clostridia	Peptostreptococcales	f__Anaerovoracaceae	g__RGIG7179	s__
Ce10.27	MAG254	0	0	0	90.6033	274.459	68.6148	0.0171	0.0210099	87.67	2.52	Ce	d__Bacteria	p__Firmicutes_A	c__Clostridia	Oscillospirales	f__Ruminococcaceae	g__RGIG4131	s__RGIG4131 sp015066785
Ce10.28	MAG255	0	0	0	305.099	137.368	34.3419	<.0001	1.08446e-06	89.7	7.85	Ce	d__Bacteria	p__Firmicutes_A	c__Clostridia	Peptostreptococcales	f__Anaerovoracaceae	g__CAG-238	s__CAG-238 sp017436705
Ce10.55	MAG256	0	0	0	393.414	1192.53	298.133	0.0359	0.0419998	91.12	0.34	Ce	d__Bacteria	p__Firmicutes_A	c__Clostridia	Oscillospirales	f__Acutalibacteraceae	g__SIG575	s__
Ce10.56	MAG257	0	0	0	164.041	295.043	73.7608	0.0015	0.00216609	83.81	2.57	Ce	d__Bacteria	p__Firmicutes_A	c__Clostridia	Oscillospirales	f__CAG-382	g__UMGS1052	s__
Ce10.83	MAG258	0	0	0	101.267	214.629	53.6572	0.0015	0.00216609	55.04	0	Ce	d__Bacteria	p__Firmicutes_A	c__Clostridia	Oscillospirales	f__QAKW01	g__QAKW01	s__
Ce10.84	MAG259	0	0	0	182.736	381.989	95.4973	0.0015	0.00216609	65.04	3.02	Ce	d__Bacteria	p__Firmicutes_A	c__Clostridia	Oscillospirales	f__CAG-382	g__UBA1752	s__
Ce10.98	MAG260	0	0	0	374.675	652.802	163.2	<.0001	8.28023e-06	96.55	0	Ce	d__Bacteria	p__Planctomycetota	c__Planctomycetia	Pirellulales	f__Thermoguttaceae	g__RUG369	s__RUG369 sp017436025
Ce10.99	MAG261	0	0	0	607.353	1127.34	281.835	0.0006	0.000956857	95.75	4.42	Ce	d__Bacteria	p__Firmicutes_A	c__Clostridia	Oscillospirales	f__Acutalibacteraceae	g__UBA8612	s__UBA8612 sp017416765
Ce10.102	MAG262	0	0	0	142.966	340.56	85.14	0.0035	0.00478424	89.25	2.46	Ce	d__Bacteria	p__Firmicutes_A	c__Clostridia	Oscillospirales	f__CAG-272	g__RGIG1995	s__RGIG1995 sp017395725
Ce10.129	MAG263	0	0	0	626.05	314.769	78.6923	<.0001	1.08446e-06	79.43	7.18	Ce	d__Bacteria	p__Firmicutes_A	c__Clostridia	Oscillospirales	f__Oscillospiraceae	g__Faecousia	s__
Ce10.133	MAG264	0	0	0	132.614	103.103	25.7758	<.0001	2.90589e-06	68.15	2.38	Ce	d__Bacteria	p__Firmicutes	c__Bacilli	Erysipelotrichales	f__Erysipelotrichaceae	g__SIG230	s__SIG230 sp015058845
Ce10.140	MAG265	0	0	0	594.903	363.242	90.8106	<.0001	2.90589e-06	70.84	3.48	Ce	d__Bacteria	p__Firmicutes_A	c__Clostridia	Oscillospirales	f__UBA644	g__HGM12619	s__HGM12619 sp015067305
Ce10.142	MAG266	0	0	0	332.393	381.716	95.429	<.0001	2.32495e-05	94.13	0.54	Ce	d__Bacteria	p__Bacteroidota	c__Bacteroidia	Bacteroidales	f__Tannerellaceae	g__Parabacteroides	s__Parabacteroides distasonis_B
Ce10.148	MAG267	0	0	0	268.011	467.976	116.994	0.0035	0.00478424	81.32	9.4	Ce	d__Bacteria	p__Firmicutes_A	c__Clostridia	Oscillospirales	f__Acutalibacteraceae	g__Fimenecus	s__
Ce10.150	MAG268	0	0	0	579.118	1156.33	289.082	0.0015	0.00216609	87.62	4.7	Ce	d__Bacteria	p__Firmicutes_A	c__Clostridia	UMGS1840	f__UMGS1840	g__SIG452	s__
Ce10.151	MAG269	0	0	0	93.2679	280.105	70.0262	0.1508	0.165656	86.78	5.7	Ce	d__Bacteria	p__Firmicutes_A	c__Clostridia	Oscillospirales	f__UBA644	g__RGIG995	s__
Ce10.153	MAG270	0	0	0	716.354	757.138	189.284	<.0001	1.08446e-06	76.1	7.66	Ce	d__Bacteria	p__Firmicutes_A	c__Clostridia	Christensenellales	f__CAG-74	g__UBA11524	s__
Ce10.167	MAG271	0	0	0	349.53	532.656	133.164	0.0015	0.00216609	93.48	9.08	Ce	d__Bacteria	p__Firmicutes_A	c__Clostridia	UMGS1840	f__UMGS1840	g__SIG452	s__
Ce10.171	MAG272	0	0	0	271.767	438.284	109.571	0.0006	0.000956857	94.88	9.26	Ce	d__Bacteria	p__Firmicutes_A	c__Clostridia	Oscillospirales	f__Acutalibacteraceae	g__DTU089	s__DTU089 sp015065845
Ce10.286	MAG273	0	0	0	2094.3	2200.82	550.204	<.0001	8.28023e-06	68.96	3.02	Ce	d__Bacteria	p__Firmicutes_A	c__Clostridia	Oscillospirales	f__Ruminococcaceae	g__UBA11540	s__
Ce10.318	MAG274	0	0	0	1128.59	1874.72	468.681	<.0001	1.08446e-06	90.9	5.2	Ce	d__Bacteria	p__Firmicutes_A	c__Clostridia	Oscillospirales	f__Ruminococcaceae	g__UMGS1668	s__
Ce10.332	MAG275	0	0	0	1397.31	1726.78	431.694	<.0001	1.08446e-06	51.78	1.85	Ce	d__Bacteria	p__Firmicutes_A	c__Clostridia	Oscillospirales	f__Oscillospiraceae	g__Faecousia	s__
Ce10.348	MAG276	0	0	0	5727.5	6150.89	1537.72	<.0001	1.08446e-06	84.21	2.4	Ce	d__Bacteria	p__Bacteroidota	c__Bacteroidia	Bacteroidales	f__UBA932	g__Cryptobacteroides	s__Cryptobacteroides sp015060395
Ce10.362	MAG277	43.6517	70.138	17.5345	1588.81	1943.63	485.909	<.0001	2.90589e-06	72.33	5.95	Ce	d__Bacteria	p__Firmicutes_A	c__Clostridia	TANB77	f__CAG-508	g__HGM13634	s__
Ce10.448	MAG278	0	0	0	606.127	269.769	67.4422	<.0001	1.08446e-06	62.07	5.17	Ce	d__Bacteria	p__Firmicutes_B	c__Peptococcia	Peptococcales	f__Peptococcaceae	g__UBA7185	s__UBA7185 sp017622155
Ce10.449	MAG279	0	0	0	1138.73	1029.96	257.491	<.0001	1.08446e-06	67.79	2.75	Ce	d__Bacteria	p__Firmicutes_A	c__Clostridia	Oscillospirales	f__Oscillospiraceae	g__Lawsonibacter	s__
Ce10.457	MAG280	0	0	0	707.184	846.768	211.692	<.0001	8.28023e-06	57.7	2.35	Ce	d__Bacteria	p__Firmicutes_A	c__Clostridia	Oscillospirales	f__Acutalibacteraceae	g__UBA5905	s__
Ce10.463	MAG281	0	0	0	259.672	163.459	40.8646	<.0001	1.08446e-06	93.08	1.34	Ce	d__Bacteria	p__Firmicutes_A	c__Clostridia	Oscillospirales	f__Ruminococcaceae	g__UBA3818	s__UBA3818 sp017408855
Ce10.464	MAG282	0	0	0	276.838	521.742	130.436	0.0035	0.00478424	92.07	1.62	Ce	d__Bacteria	p__Firmicutes_A	c__Clostridia	Oscillospirales	f__Acutalibacteraceae	g__Ruminococcus_E	s__Ruminococcus_E sp017407755
Ce10.466	MAG283	4.44156	17.7662	4.44156	824.388	469.966	117.492	<.0001	1.48978e-06	76.5	6.88	Ce	d__Bacteria	p__Firmicutes_A	c__Clostridia	Oscillospirales	f__Oscillospiraceae	g__Evtepia	s__Evtepia sp017435425
Ce10.468	MAG284	0	0	0	416.387	538.496	134.624	<.0001	8.28023e-06	56.88	0	Ce	d__Bacteria	p__Firmicutes_A	c__Clostridia	Christensenellales	f__CAG-74	g__RUG563	s__RUG563 sp017437265
Ce10.472	MAG285	0	0	0	191.466	224.095	56.0237	<.0001	8.28023e-06	53.51	1.75	Ce	d__Bacteria	p__Firmicutes_A	c__Clostridia	Lachnospirales	f__Lachnospiraceae	g__Roseburia	s__
Ce10.473	MAG286	0	0	0	273.941	953.436	238.359	0.1508	0.165656	92.84	0.67	Ce	d__Bacteria	p__Firmicutes_A	c__Clostridia	Oscillospirales	f__Acutalibacteraceae	g__UBA737	s__
Ce10.475	MAG287	32.0503	89.42	22.355	5392.2	20344.9	5086.23	0.0004	0.00061628	97.94	4.36	Ce	d__Bacteria	p__Firmicutes	c__Bacilli	RF39	f__UBA660	g__CAG-877	s__CAG-877 sp016293205
Ce10.476	MAG288	0	0	0	989.803	486.352	121.588	<.0001	1.08446e-06	62.13	9.58	Ce	d__Bacteria	p__Firmicutes_A	c__Clostridia	Lachnospirales	f__Anaerotignaceae	g__Anaerotignum	s__Anaerotignum sp017442465
Ce10.477	MAG289	0	0	0	264.357	481.881	120.47	0.0079	0.0101688	92.06	1.7	Ce	d__Bacteria	p__Firmicutes_A	c__Clostridia	Oscillospirales	f__Acutalibacteraceae	g__UMGS1976	s__UMGS1976 sp017399535
Ce10.478	MAG290	0	0	0	171.624	571.522	142.88	0.0737	0.0837988	86.09	2.35	Ce	d__Bacteria	p__Firmicutes_A	c__Clostridia	Oscillospirales	f__Acutalibacteraceae	g__UMGS1484	s__
Ce10.480	MAG291	0	0	0	311.413	402.689	100.672	0.0002	0.000400461	55.43	2.63	Ce	d__Bacteria	p__Firmicutes_A	c__Clostridia	UMGS1810	f__UMGS1810	g__RGIG8748	s__
Ce10.482	MAG292	0	0	0	202.875	588.713	147.178	0.0002	0.000400461	50	0	Ce	d__Bacteria	p__Firmicutes_A	c__Clostridia	Christensenellales	f__Christensenellaceae	g__HGM11616	s__
Ce10.484	MAG293	0	0	0	554.435	593.387	148.347	<.0001	1.08446e-06	68.32	2.91	Ce	d__Bacteria	p__Firmicutes_A	c__Clostridia	Oscillospirales	f__Oscillospiraceae	g__Faecousia	s__
Ce10.492	MAG294	0	0	0	77.3245	251.132	62.7831	0.1508	0.165656	77.87	3.38	Ce	d__Bacteria	p__Firmicutes_A	c__Clostridia	Christensenellales	f__CAG-138	g__JAEDJH01	s__JAEDJH01 sp016296415
Ce10.493	MAG295	0	0	0	211.058	745.542	186.386	0.0737	0.0837988	71.25	0	Ce	d__Bacteria	p__Firmicutes_A	c__Clostridia	UMGS1810	f__UMGS1810	g__SIG455	s__
Ce10.501	MAG296	0	0	0	214.406	276.358	69.0896	<.0001	6.30507e-05	67.45	1.7	Ce	d__Bacteria	p__Firmicutes_A	c__Clostridia	UBA1381	f__UBA1381	g__UBA1738	s__
Ce10.531	MAG297	0	0	0	8721.03	15992.5	3998.11	0.0006	0.000956857	95.32	0.82	Ce	d__Bacteria	p__Bacteroidota	c__Bacteroidia	Bacteroidales	f__F082	g__Limimorpha	s__
Ce10.532	MAG298	0	0	0	166.628	183.863	45.9657	<.0001	8.28023e-06	56.9	8.97	Ce	d__Bacteria	p__Firmicutes_A	c__Clostridia	Oscillospirales	f__CAG-382	g__SIG627	s__
Ce10.535	MAG299	0	0	0	1930.47	4866.58	1216.64	0.0006	0.000956857	96.53	0.89	Ce	d__Bacteria	p__Firmicutes_A	c__Clostridia	Oscillospirales	f__Acutalibacteraceae	g__UBA8612	s__UBA8612 sp017625095
Ce10.536	MAG300	0	0	0	298.786	711.968	177.992	0.0079	0.0101688	97.09	1.34	Ce	d__Bacteria	p__Firmicutes_A	c__Clostridia	Oscillospirales	f__CAG-272	g__Flemingibacterium	s__
Ce10.539	MAG301	1137.86	1509.78	377.445	302.786	871.779	217.945	0.0018	0.00260326	96.77	1.61	R	d__Bacteria	p__Bacteroidota	c__Bacteroidia	Bacteroidales	f__P3	g__UBA1711	s__UBA1711 sp900314925
Ce10.541	MAG302	0	0	0	1840.31	5035.45	1258.86	<.0001	0.000161125	91.28	0.34	Ce	d__Bacteria	p__Firmicutes_A	c__Clostridia	Oscillospirales	f__Acutalibacteraceae	g__CAG-488	s__CAG-488 sp017942105
Ce10.545	MAG303	0	0	0	627.7	1080.21	270.052	0.0079	0.0101688	88.68	0	Ce	d__Bacteria	p__Bacteroidota	c__Bacteroidia	Bacteroidales	f__Muribaculaceae	g__CAG-485	s__CAG-485 sp015061085
Ce10.551	MAG304	0	0	0	87.3631	349.453	87.3631	0.3173	0.337339	88.99	2.01	Ce	d__Bacteria	p__Firmicutes_A	c__Clostridia	Oscillospirales	f__Acutalibacteraceae	g__UBA737	s__
Ce10.553	MAG305	0	0	0	345.065	1192.49	298.123	0.0359	0.0419998	90.6	0.34	Ce	d__Bacteria	p__Firmicutes_A	c__Clostridia	Oscillospirales	f__Oscillospiraceae	g__Faecousia	s__Faecousia sp015067565
Ce10.555	MAG306	0	0	0	250.642	644.578	161.145	0.0035	0.00478424	95.53	0.67	Ce	d__Bacteria	p__Firmicutes_A	c__Clostridia	Oscillospirales	f__QAKW01	g__QAKW01	s__
Ce10.558	MAG307	0	0	0	262.891	276.151	69.0377	<.0001	2.90589e-06	58.11	0.67	Ce	d__Bacteria	p__Firmicutes_A	c__Clostridia	Oscillospirales	f__Butyricicoccaceae	g__SIG471	s__
Ce10.561	MAG308	0	0	0	240.88	430.13	107.533	<.0001	0.000161125	87.75	2.57	Ce	d__Bacteria	p__Firmicutes_A	c__Clostridia	Oscillospirales	f__Oscillospiraceae	g__RGIG2163	s__RGIG2163 sp017408525
Ce10.566	MAG309	0	0	0	183.522	467.062	116.765	0.0079	0.0101688	89.56	2.52	Ce	d__Bacteria	p__Firmicutes_A	c__Clostridia	Oscillospirales	f__Acutalibacteraceae	g__CAG-177	s__
Ce10.568	MAG310	0	0	0	222.427	889.708	222.427	0.3173	0.337339	95.08	0	Ce	d__Bacteria	p__Firmicutes_A	c__Clostridia	Oscillospirales	f__CAG-272	g__RUG14199	s__
Ce10.573	MAG311	0	0	0	765.879	768.087	192.022	<.0001	8.28023e-06	75.84	1.9	Ce	d__Bacteria	p__Firmicutes_A	c__Clostridia	Oscillospirales	f__CAG-272	g__SIG701	s__
Ce10.577	MAG312	0	0	0	469.287	960.455	240.114	<.0001	2.90589e-06	94.33	4.9	Ce	d__Bacteria	p__Firmicutes_A	c__Clostridia	Lachnospirales	f__Lachnospiraceae	g__Acetatifactor	s__
Ce10.578	MAG313	0	0	0	308.682	633.516	158.379	<.0001	6.30507e-05	69.79	1.42	Ce	d__Bacteria	p__Firmicutes_A	c__Clostridia	TANB77	f__CAG-465	g__	s__
Ce10.579	MAG314	0	0	0	227.417	247.586	61.8966	<.0001	0.000161125	56.59	1.64	Ce	d__Bacteria	p__Firmicutes_A	c__Clostridia	Oscillospirales	f__Butyricicoccaceae	g__RGIG3513	s__RGIG3513 sp017408485
Ce10.580	MAG315	0	0	0	1130.87	1604.53	401.133	<.0001	1.08446e-06	85.42	3.06	Ce	d__Bacteria	p__Firmicutes_A	c__Clostridia	Lachnospirales	f__Lachnospiraceae	g__Faecalimonas	s__
Ce10.581	MAG316	0	0	0	430.073	578.997	144.749	<.0001	0.000161125	88.63	3.54	Ce	d__Bacteria	p__Bacteroidota	c__Bacteroidia	Bacteroidales	f__Rikenellaceae	g__Alistipes	s__Alistipes sp017465605
Ce10.584	MAG317	0	0	0	1697.84	784.764	196.191	<.0001	1.08446e-06	86.93	3.18	Ce	d__Bacteria	p__Firmicutes_A	c__Clostridia	Oscillospirales	f__Oscillospiraceae	g__Faecousia	s__
Ce10.586	MAG318	0	0	0	710.935	702.675	175.669	<.0001	1.08446e-06	61.76	1.93	Ce	d__Bacteria	p__Firmicutes_A	c__Clostridia	Lachnospirales	f__Lachnospiraceae	g__UBA3766	s__UBA3766 sp017622505
Ce10.587	MAG319	0	0	0	235.998	614.179	153.545	0.0015	0.00216609	86.91	2.73	Ce	d__Bacteria	p__Firmicutes_A	c__Clostridia	Oscillospirales	f__Acutalibacteraceae	g__RGIG2945	s__
Ce10.588	MAG320	0	0	0	1825.68	2576.79	644.198	<.0001	2.90589e-06	92.41	2.97	Ce	d__Bacteria	p__Bacteroidota	c__Bacteroidia	Bacteroidales	f__Bacteroidaceae	g__UBA1189	s__UBA1189 sp017622495
Ce10.591	MAG321	0	0	0	918.617	2851.14	712.784	<.0001	6.30507e-05	91.28	0.85	Ce	d__Bacteria	p__Firmicutes_A	c__Clostridia	Oscillospirales	f__Oscillospiraceae	g__Faecousia	s__
Ce10.597	MAG322	0	0	0	1771.48	2784.97	696.243	<.0001	1.08446e-06	97.41	2.45	Ce	d__Bacteria	p__Firmicutes_C	c__Negativicutes	Acidaminococcales	f__Acidaminococcaceae	g__Phascolarctobacterium_A	s__Phascolarctobacterium_A sp017623055
Ce10.600	MAG323	58.6073	94.7565	23.6891	835.69	1035.67	258.917	<.0001	2.93404e-05	61.11	2.52	Ce	d__Bacteria	p__Firmicutes_A	c__Clostridia	TANB77	f__CAG-508	g__Scatovivens	s__
Ce10.602	MAG324	0	0	0	833.57	1128.56	282.14	<.0001	1.08446e-06	80.15	1.34	Ce	d__Bacteria	p__Firmicutes_A	c__Clostridia	Oscillospirales	f__Oscillospiraceae	g__Faecousia	s__
Ce10.607	MAG325	0	0	0	580.818	1131.49	282.872	0.0006	0.000956857	97.32	3.83	Ce	d__Bacteria	p__Firmicutes_A	c__Clostridia	Oscillospirales	f__Acutalibacteraceae	g__Fimenecus	s__
Ce10.610	MAG326	0	0	0	366.957	726.526	181.632	0.0015	0.00216609	89.26	0	Ce	d__Bacteria	p__Firmicutes_A	c__Clostridia	Oscillospirales	f__Acutalibacteraceae	g__SIG575	s__
Ce10.614	MAG327	0	0	0	425.442	560.465	140.116	<.0001	2.90589e-06	68.68	1.77	Ce	d__Bacteria	p__Firmicutes_A	c__Clostridia	TANB77	f__RGIG9151	g__RGIG9151	s__
Ce10.615	MAG328	44.8541	73.1678	18.292	970.178	815.673	203.918	<.0001	2.90589e-06	61.91	4.7	Ce	d__Bacteria	p__Firmicutes_A	c__Clostridia	TANB77	f__CAG-508	g__CAG-269	s__
Ce10.617	MAG329	0	0	0	438.58	644.2	161.05	<.0001	6.30507e-05	87.81	1.34	Ce	d__Bacteria	p__Firmicutes_A	c__Clostridia	UMGS1883	f__UMGS1883	g__UMGS1883	s__UMGS1883 sp017441965
Ce10.621	MAG330	0	0	0	370.7	617.114	154.278	<.0001	2.32495e-05	85.84	1.01	Ce	d__Bacteria	p__Firmicutes_A	c__Clostridia	UBA1381	f__UBA1381	g__RGIG9115	s__
Ce10.623	MAG331	7.0821	28.3284	7.0821	740.136	1101.27	275.319	<.0001	1.8298e-06	76.44	4.08	Ce	d__Bacteria	p__Firmicutes_A	c__Clostridia	TANB77	f__CAG-508	g__HGM13634	s__
Ce10.625	MAG332	252.932	460.14	115.035	344.367	915.664	228.916	0.6203	0.642641	89.87	5.85	Ce	d__Archaea	p__Methanobacteriota	c__Methanobacteria	Methanobacteriales	f__Methanobacteriaceae	g__Methanobrevibacter_A	s__
Ce10.626	MAG333	0	0	0	128.724	369.03	92.2574	0.1508	0.165656	91.8	0.4	Ce	d__Bacteria	p__Firmicutes_A	c__Clostridia	Oscillospirales	f__CAG-382	g__	s__
Ce10.634	MAG334	0	0	0	145.606	489.988	122.497	0.0171	0.0210099	88.37	1.68	Ce	d__Bacteria	p__Firmicutes_A	c__Clostridia	Lachnospirales	f__Lachnospiraceae	g__CAG-127	s__
Ce10.635	MAG335	0	0	0	1103.56	1794.36	448.59	<.0001	8.28023e-06	94.38	4.61	Ce	d__Bacteria	p__Firmicutes	c__Bacilli	RF39	f__UBA660	g__RUG11788	s__
Ce10.637	MAG336	0	0	0	398.564	426.786	106.697	<.0001	2.90589e-06	95.48	2.14	Ce	d__Bacteria	p__Bacteroidota	c__Bacteroidia	Bacteroidales	f__UBA932	g__Egerieousia	s__Egerieousia sp017935505
Ce10.638	MAG337	778.758	1988.1	497.024	515.347	633.257	158.314	0.3642	0.3849	80.93	7.78	R	d__Archaea	p__Methanobacteriota	c__Methanobacteria	Methanobacteriales	f__Methanobacteriaceae	g__Methanobrevibacter_A	s__Methanobrevibacter_A thaueri_B
Ce10.642	MAG338	0	0	0	189.482	279.397	69.8493	<.0001	2.32495e-05	73.65	1.34	Ce	d__Bacteria	p__Firmicutes_A	c__Clostridia	Oscillospirales	f__JAAYXM01	g__SIG480	s__
Ce10.644	MAG339	0	0	0	236.563	320.94	80.2349	<.0001	2.32495e-05	59.44	0	Ce	d__Bacteria	p__Firmicutes_A	c__Clostridia	Lachnospirales	f__Lachnospiraceae	g__CAG-194	s__
Ce10.645	MAG340	0	0	0	1289.08	1347.27	336.816	<.0001	1.08446e-06	96.49	4.97	Ce	d__Bacteria	p__Firmicutes_A	c__Clostridia	Christensenellales	f__CAG-74	g__Limiplasma	s__
Ce10.646	MAG341	0	0	0	325.346	958.845	239.711	0.0015	0.00216609	95.41	4.25	Ce	d__Bacteria	p__Firmicutes_A	c__Clostridia	UMGS1810	f__UMGS1810	g__RGIG1828	s__
Ce13.1	MAG342	0	0	0	306.417	679.347	169.837	0.0015	0.00216609	88.96	4.79	Ce	d__Bacteria	p__Bacteroidota	c__Bacteroidia	Bacteroidales	f__Bacteroidaceae	g__HGM04593	s__HGM04593 sp017467015
Ce13.5	MAG343	0	0	0	255.952	508.035	127.009	0.0079	0.0101688	91.74	0.81	Ce	d__Bacteria	p__Firmicutes_A	c__Clostridia	Oscillospirales	f__Acutalibacteraceae	g__SFWF01	s__SFWF01 sp017936045
Ce13.8	MAG344	0	0	0	115.564	310.347	77.5867	0.0171	0.0210099	51.68	2.52	Ce	d__Bacteria	p__Firmicutes_A	c__Clostridia	Oscillospirales	f__CAG-272	g__Firm-07	s__Firm-07 sp015063895
Ce13.12	MAG345	0	0	0	346.296	749.718	187.429	0.0002	0.000400461	99.04	2.56	Ce	d__Bacteria	p__Bacteroidota	c__Bacteroidia	Bacteroidales	f__Rikenellaceae	g__Alistipes	s__
Ce13.16	MAG346	0	0	0	240.488	940.076	235.019	0.1508	0.165656	88.59	3.23	Ce	d__Bacteria	p__Firmicutes_A	c__Clostridia	Christensenellales	f__Borkfalkiaceae	g__HGM11412	s__
Ce13.28	MAG347	0	0	0	431.202	772.998	193.249	0.0002	0.000400461	92.31	0.7	Ce	d__Bacteria	p__Spirochaetota	c__Spirochaetia	Treponematales	f__Treponemataceae	g__Treponema_F	s__Treponema_F sp017936345
Ce13.29	MAG348	0	0	0	204.707	270.74	67.685	<.0001	0.000161125	86.91	2.47	Ce	d__Bacteria	p__Firmicutes_A	c__Clostridia	Oscillospirales	f__Acutalibacteraceae	g__UBA737	s__
Ce13.47	MAG349	0	0	0	363.001	447.544	111.886	<.0001	2.90589e-06	91.27	5.25	Ce	d__Bacteria	p__Bacteroidota	c__Bacteroidia	Bacteroidales	f__UBA932	g__Egerieousia	s__Egerieousia sp017935505
Ce13.54	MAG350	0	0	0	232.967	517.134	129.283	0.0035	0.00478424	94.77	3.41	Ce	d__Bacteria	p__Firmicutes_A	c__Clostridia	HGM11514	f__HGM11514	g__SIG438	s__
Ce13.78	MAG351	0	0	0	409.861	1293.9	323.475	0.0015	0.00216609	67.94	3.3	Ce	d__Bacteria	p__Firmicutes_A	c__Clostridia	Christensenellales	f__UBA1242	g__RGIG1681	s__
Ce13.89	MAG352	0	0	0	659.778	2170.61	542.653	0.1508	0.165656	98.43	2.01	Ce	d__Bacteria	p__Firmicutes_A	c__Clostridia	Oscillospirales	f__QAKW01	g__QAKW01	s__
Ce13.104	MAG353	0	0	0	138.169	518.489	129.622	0.1508	0.165656	61.43	0.84	Ce	d__Bacteria	p__Firmicutes_A	c__Clostridia	Christensenellales	f__UBA1242	g__UBA11490	s__
Ce13.108	MAG354	0	0	0	356.86	610.05	152.512	<.0001	0.000161125	96.81	1.52	Ce	d__Bacteria	p__Firmicutes_A	c__Clostridia	Oscillospirales	f__Acutalibacteraceae	g__RUG11462	s__
Ce13.130	MAG355	0	0	0	133.985	266.746	66.6866	0.0035	0.00478424	76.68	4.2	Ce	d__Bacteria	p__Firmicutes_A	c__Clostridia	Oscillospirales	f__Ruminococcaceae	g__	s__
Ce13.131	MAG356	0	0	0	174.034	212.735	53.1838	<.0001	8.28023e-06	80.12	8.91	Ce	d__Bacteria	p__Firmicutes_A	c__Clostridia	UMGS1883	f__UMGS1883	g__RGIG1927	s__RGIG1927 sp017440585
Ce13.133	MAG357	0	0	0	299.023	276.034	69.0084	<.0001	1.08446e-06	90.85	2.68	Ce	d__Bacteria	p__Firmicutes_A	c__Clostridia	Oscillospirales	f__Ruminococcaceae	g__UBA3818	s__UBA3818 sp017408855
Ce13.134	MAG358	0	0	0	224.451	333.11	83.2775	<.0001	0.000161125	89.52	3.74	Ce	d__Bacteria	p__Bacteroidota	c__Bacteroidia	Flavobacteriales	f__UBA1820	g__Merdimorpha	s__Merdimorpha sp017620815
Ce13.135	MAG359	0	0	0	138.609	109.756	27.4389	<.0001	1.08446e-06	50.87	0.47	Ce	d__Bacteria	p__Firmicutes	c__Bacilli	Erysipelotrichales	f__Erysipelotrichaceae	g__SIG230	s__SIG230 sp015058845
Ce13.143	MAG360	0	0	0	297.437	160.853	40.2132	<.0001	1.08446e-06	89.05	3.76	Ce	d__Bacteria	p__Firmicutes	c__Bacilli	Erysipelotrichales	f__Erysipelotrichaceae	g__RGIG1896	s__RGIG1896 sp017397025
Ce13.145	MAG361	0	0	0	428.848	276.759	69.1897	<.0001	1.08446e-06	73.38	2.13	Ce	d__Bacteria	p__Firmicutes_A	c__Clostridia	Peptostreptococcales	f__Anaerovoracaceae	g__RGIG9096	s__RGIG9096 sp017936025
Ce13.152	MAG362	0	0	0	559.099	766.044	191.511	<.0001	2.90589e-06	89.18	1.4	Ce	d__Bacteria	p__Firmicutes_A	c__Clostridia	Oscillospirales	f__CAG-272	g__SIG701	s__
Ce13.154	MAG363	462.888	1403.48	350.869	611.532	739.047	184.762	0.0031	0.00431999	60.11	6.53	Ce	d__Bacteria	p__Firmicutes_A	c__Clostridia	TANB77	f__CAG-508	g__Scatovivens	s__
Ce13.177	MAG364	0	0	0	367.516	572.804	143.201	<.0001	6.30507e-05	64.91	3.51	Ce	d__Bacteria	p__Firmicutes	c__Bacilli	RF39	f__UBA660	g__RUG705	s__
Ce13.394	MAG365	0	0	0	768.743	1452.09	363.021	0.0002	0.000400461	95.47	3.96	Ce	d__Bacteria	p__Bacteroidota	c__Bacteroidia	Bacteroidales	f__Barnesiellaceae	g__Barnesiella_A	s__Barnesiella_A sp017410245
Ce13.395	MAG366	0	0	0	817.186	1608.1	402.024	<.0001	1.08446e-06	99.33	0.67	Ce	d__Bacteria	p__Firmicutes_A	c__Clostridia	Lachnospirales	f__Lachnospiraceae	g__CAG-127	s__CAG-127 sp017625815
Ce13.413	MAG367	0	0	0	451.103	895.873	223.968	0.0035	0.00478424	95.3	2.64	Ce	d__Bacteria	p__Firmicutes_A	c__Clostridia	Oscillospirales	f__Acutalibacteraceae	g__UMGS1976	s__UMGS1976 sp017399535
Ce13.414	MAG368	0	0	0	859.911	1566.44	391.609	0.0171	0.0210099	91.84	0	Ce	d__Bacteria	p__Verrucomicrobiota	c__Verrucomicrobiae	Verrucomicrobiales	f__Akkermansiaceae	g__Akkermansia	s__Akkermansia sp017471985
Ce13.419	MAG369	0	0	0	500.867	1120.88	280.22	0.0035	0.00478424	95.97	0	Ce	d__Bacteria	p__Firmicutes_A	c__Clostridia	Oscillospirales	f__Acutalibacteraceae	g__SIG589	s__
Ce13.423	MAG370	0	0	0	1161.6	2404.81	601.203	<.0001	2.32495e-05	96.63	2.64	Ce	d__Bacteria	p__Bacteroidota	c__Bacteroidia	Bacteroidales	f__Rikenellaceae	g__Alistipes	s__Alistipes sp017442365
Ce13.429	MAG371	0	0	0	874.765	981.262	245.315	<.0001	8.28023e-06	81.24	1.79	Ce	d__Bacteria	p__Firmicutes_A	c__Clostridia	Oscillospirales	f__CAG-272	g__SIG701	s__
Ce13.430	MAG372	0	0	0	371.597	533.692	133.423	<.0001	6.30507e-05	84.67	0.04	Ce	d__Bacteria	p__Firmicutes_A	c__Clostridia	Christensenellales	f__Borkfalkiaceae	g__UBA4636	s__UBA4636 sp017507595
Ce13.432	MAG373	0	0	0	550.409	296.942	74.2354	<.0001	1.08446e-06	53.66	5.41	Ce	d__Bacteria	p__Firmicutes_A	c__Clostridia	Oscillospirales	f__Butyricicoccaceae	g__RGIG1902	s__
Ce13.435	MAG374	0	0	0	573.907	1057.79	264.447	<.0001	2.90589e-06	86.52	1.85	Ce	d__Bacteria	p__Firmicutes_A	c__Clostridia	Oscillospirales	f__Oscillospiraceae	g__RGIG3566	s__
Ce13.436	MAG375	0	0	0	922.984	1607.08	401.771	<.0001	1.08446e-06	60.72	0	Ce	d__Bacteria	p__Firmicutes_A	c__Clostridia	Oscillospirales	f__Oscillospiraceae	g__Faecousia	s__
Ce13.441	MAG376	0	0	0	160.972	465.367	116.342	0.0359	0.0419998	72.46	1.68	Ce	d__Bacteria	p__Firmicutes_A	c__Clostridia	UMGS1810	f__UMGS1810	g__RGIG4708	s__
Ce13.458	MAG377	0	0	0	718.902	1467.49	366.871	0.0002	0.000400461	78.27	2.31	Ce	d__Bacteria	p__Firmicutes	c__Bacilli	Mycoplasmatales	f__Mycoplasmoidaceae	g__Ureaplasma	s__
Ce13.466	MAG378	0	0	0	921.927	1801.77	450.444	<.0001	1.08446e-06	90.43	5.37	Ce	d__Bacteria	p__Firmicutes_A	c__Clostridia	Oscillospirales	f__Acutalibacteraceae	g__UBA737	s__
Ce13.473	MAG379	0	0	0	1142.31	583.676	145.919	<.0001	1.08446e-06	53.5	8.75	Ce	d__Bacteria	p__Firmicutes_A	c__Clostridia	Oscillospirales	f__Butyricicoccaceae	g__UBA4644	s__
Ce13.476	MAG380	718.964	1223.74	305.936	658.073	1201.58	300.394	0.8211	0.840342	98.43	1.34	R	d__Bacteria	p__Firmicutes_A	c__Clostridia	Oscillospirales	f__Acutalibacteraceae	g__Ruminococcus_E	s__Ruminococcus_E sp900316555
Ce13.480	MAG381	0	0	0	199.558	187.813	46.9533	<.0001	8.28023e-06	94.11	7.28	Ce	d__Bacteria	p__Firmicutes_A	c__Clostridia	Christensenellales	f__CAG-74	g__RUG563	s__RUG563 sp015056015
Ce13.487	MAG382	0	0	0	580.2	1830.53	457.632	0.0737	0.0837988	92.18	1.55	Ce	d__Bacteria	p__Bacteroidota	c__Bacteroidia	Bacteroidales	f__Bacteroidaceae	g__HGM04593	s__HGM04593 sp017936265
Ce13.488	MAG383	0	0	0	219.521	878.085	219.521	0.3173	0.337339	98.18	0	Ce	d__Bacteria	p__Bacteroidota	c__Bacteroidia	Bacteroidales	f__Muribaculaceae	g__RGIG4079	s__RGIG4079 sp017505535
Ce13.491	MAG384	0	0	0	1166.97	3442.61	860.653	<.0001	1.08446e-06	91.72	2.17	Ce	d__Bacteria	p__Firmicutes_A	c__Clostridia	UMGS1840	f__HGM11507	g__SIG450	s__SIG450 sp015068665
Ce13.496	MAG385	0	0	0	218.306	547.793	136.948	0.0015	0.00216609	97.32	0.69	Ce	d__Bacteria	p__Firmicutes_A	c__Clostridia	Oscillospirales	f__JAAYXM01	g__RGIG7332	s__
Ce13.498	MAG386	0	0	0	737.268	1393.7	348.425	<.0001	6.30507e-05	84.23	1.79	Ce	d__Bacteria	p__Firmicutes_A	c__Clostridia	UMGS1883	f__UMGS1883	g__UMGS1883	s__
Ce13.502	MAG387	0	0	0	305.608	436.48	109.12	<.0001	2.32495e-05	89.69	2.68	Ce	d__Bacteria	p__Firmicutes_A	c__Clostridia	Oscillospirales	f__CAG-272	g__SIG693	s__SIG693 sp017466495
Ce13.503	MAG388	0	0	0	635.96	1748.06	437.015	0.0002	0.000400461	93.96	2.68	Ce	d__Bacteria	p__Firmicutes_A	c__Clostridia	Oscillospirales	f__Acutalibacteraceae	g__Ruminococcus_E	s__
Ce13.504	MAG389	0	0	0	1863.04	2839.59	709.896	<.0001	2.90589e-06	96.16	0	Ce	d__Bacteria	p__Bacteroidota	c__Bacteroidia	Bacteroidales	f__G3-4614	g__Caccoplasma	s__Caccoplasma sp017416695
Ce13.505	MAG390	0	0	0	472.816	1423.96	355.989	0.0015	0.00216609	92.38	0.02	Ce	d__Bacteria	p__Bacteroidota	c__Bacteroidia	Bacteroidales	f__UBA932	g__Egerieousia	s__
Ce13.510	MAG391	0	0	0	259.976	461.76	115.44	0.0006	0.000956857	95.75	0.58	Ce	d__Bacteria	p__Bacteroidota	c__Bacteroidia	Bacteroidales	f__Rikenellaceae	g__Tidjanibacter	s__Tidjanibacter sp017396085
Ce13.511	MAG392	0	0	0	569.146	1147.15	286.788	0.0006	0.000956857	94.18	0.4	Ce	d__Bacteria	p__Firmicutes_A	c__Clostridia	Oscillospirales	f__CAG-272	g__RGIG8775	s__
Ce13.512	MAG393	0	0	0	1308.66	2084.22	521.056	<.0001	1.08446e-06	92.19	4.09	Ce	d__Bacteria	p__Firmicutes_A	c__Clostridia	Lachnospirales	f__Lachnospiraceae	g__Faecalimonas	s__
Ce13.515	MAG394	0	0	0	493.176	512.304	128.076	<.0001	1.08446e-06	79.23	2.01	Ce	d__Bacteria	p__Firmicutes_A	c__Clostridia	Oscillospirales	f__Oscillospiraceae	g__Faecousia	s__
Ce13.516	MAG395	0	0	0	118.035	409.165	102.291	0.1508	0.165656	86.79	5.7	Ce	d__Bacteria	p__Firmicutes_A	c__Clostridia	Oscillospirales	f__CAG-272	g__Flemingibacterium	s__
Ce13.518	MAG396	738.602	1698.55	424.637	978.16	1048.39	262.098	0.0648	0.0751511	82	0.4	Ce	d__Archaea	p__Methanobacteriota	c__Methanobacteria	Methanobacteriales	f__Methanobacteriaceae	g__Methanobrevibacter_A	s__Methanobrevibacter_A millerae_A
Ce13.519	MAG397	0	0	0	1044.29	1654.44	413.609	<.0001	1.08446e-06	97.99	4.03	Ce	d__Bacteria	p__Firmicutes_A	c__Clostridia	UBA1381	f__UBA1381	g__UBA1738	s__
Ce13.521	MAG398	0	0	0	297.434	488.039	122.01	<.0001	8.28023e-06	97.32	1.01	Ce	d__Bacteria	p__Firmicutes_A	c__Clostridia	Oscillospirales	f__Acutalibacteraceae	g__HGM12789	s__HGM12789 sp015066215
Ce13.522	MAG399	0	0	0	208.406	462.502	115.626	0.0015	0.00216609	97.99	1.01	Ce	d__Bacteria	p__Firmicutes_A	c__Clostridia	Oscillospirales	f__Acutalibacteraceae	g__Ruminococcus_E	s__
Ce13.523	MAG400	84.4608	131.555	32.8887	101.751	303.096	75.774	0.4356	0.456729	59.48	1.72	Ce	d__Bacteria	p__Bacteroidota	c__Bacteroidia	Bacteroidales	f__Bacteroidaceae	g__UBA4334	s__UBA4334 sp900318775
Ce13.526	MAG401	0	0	0	683.803	864.175	216.044	<.0001	1.08446e-06	78.64	4.72	Ce	d__Bacteria	p__Firmicutes_B	c__Peptococcia	Peptococcales	f__Peptococcaceae	g__UBA7185	s__UBA7185 sp017399005
Ce13.529	MAG402	0	0	0	1733.28	4062.86	1015.71	0.0006	0.000956857	96.42	0.36	Ce	d__Bacteria	p__Firmicutes_A	c__Clostridia	Oscillospirales	f__Acutalibacteraceae	g__UBA8612	s__UBA8612 sp017416765
Ce13.530	MAG403	24.9346	99.7383	24.9346	1380.91	2972.51	743.128	<.0001	8.35347e-06	54.7	7.02	Ce	d__Bacteria	p__Firmicutes_A	c__Clostridia	TANB77	f__CAG-508	g__Scatovivens	s__
Ce13.536	MAG404	0	0	0	671.814	1738.15	434.538	0.0015	0.00216609	90	0.67	Ce	d__Bacteria	p__Firmicutes_A	c__Clostridia	Oscillospirales	f__Acutalibacteraceae	g__UBA737	s__UBA737 sp017403065
Ce13.538	MAG405	0	0	0	369.119	554.182	138.546	<.0001	6.30507e-05	59.48	3.45	Ce	d__Bacteria	p__Bacteroidota	c__Bacteroidia	Bacteroidales	f__Bacteroidaceae	g__Phocaeicola_A	s__Phocaeicola_A sp017416805
Ce13.544	MAG406	0	0	0	1683.54	2442.13	610.533	<.0001	1.08446e-06	55.31	0.34	Ce	d__Bacteria	p__Firmicutes_A	c__Clostridia	Oscillospirales	f__Oscillospiraceae	g__Faecousia	s__Faecousia sp017435615
Ce13.545	MAG407	0	0	0	1043.73	1755.66	438.914	<.0001	1.08446e-06	85.07	5.62	Ce	d__Bacteria	p__Firmicutes	c__Bacilli	RF39	f__UBA660	g__UMGS1124	s__
Ce13.546	MAG408	158.414	262.41	65.6025	183.8	356.335	89.0837	0.9349	0.946902	68.03	0.31	Ce	d__Bacteria	p__Patescibacteria	c__Saccharimonadia	Saccharimonadales	f__Nanosyncoccaceae	g__Nanosyncoccus	s__
Ce13.549	MAG409	0	0	0	2833.1	10697.6	2674.39	0.0359	0.0419998	93.42	2.01	Ce	d__Bacteria	p__Firmicutes_A	c__Clostridia	Oscillospirales	f__Acutalibacteraceae	g__UBA737	s__
Ce13.553	MAG410	0	0	0	691.949	1431.34	357.834	0.0359	0.0419998	95.08	0.36	Ce	d__Bacteria	p__Firmicutes_A	c__Clostridia	Monoglobales	f__Monoglobaceae	g__UMGS1820	s__UMGS1820 sp902791425
Ce13.554	MAG411	0	0	0	520.192	1133.15	283.289	0.0006	0.000956857	67.81	1.46	Ce	d__Bacteria	p__Firmicutes_A	c__Clostridia	TANB77	f__CAG-465	g__CAG-465	s__
Ce13.556	MAG412	0	0	0	455.674	667.348	166.837	<.0001	0.000161125	64.91	0	Ce	d__Bacteria	p__Firmicutes	c__Bacilli	Erysipelotrichales	f__Coprobacillaceae	g__MGBC113645	s__
Ce13.557	MAG413	0	0	0	2162.03	2269.78	567.446	<.0001	1.08446e-06	92.82	9.68	Ce	d__Bacteria	p__Firmicutes_A	c__Clostridia	Oscillospirales	f__Oscillospiraceae	g__Faecousia	s__
Ce13.558	MAG414	0	0	0	849.87	552.289	138.072	<.0001	1.08446e-06	70.97	1.68	Ce	d__Bacteria	p__Firmicutes_A	c__Clostridia	Oscillospirales	f__Oscillospiraceae	g__Faecousia	s__
Ce13.559	MAG415	0	0	0	629.064	1174.1	293.524	0.0035	0.00478424	89.3	1.92	Ce	d__Bacteria	p__Bacteroidota	c__Bacteroidia	Bacteroidales	f__Rikenellaceae	g__Alistipes	s__Alistipes sp015060165
Ce13.560	MAG416	0	0	0	838.518	1463.5	365.874	0.0002	0.000400461	97.6	1.28	Ce	d__Bacteria	p__Bacteroidota	c__Bacteroidia	Bacteroidales	f__Rikenellaceae	g__Alistipes	s__Alistipes sp017398555
Ce13.563	MAG417	0	0	0	1655.19	3984.47	996.117	0.0035	0.00478424	89.6	0.67	Ce	d__Bacteria	p__Firmicutes_A	c__Clostridia	UBA1381	f__UBA1381	g__RGIG9115	s__
Ce13.564	MAG418	0	0	0	804.381	624.199	156.05	<.0001	1.08446e-06	65.4	0.81	Ce	d__Bacteria	p__Firmicutes_A	c__Clostridia	Lachnospirales	f__Lachnospiraceae	g__Agathobacter	s__
Ce13.566	MAG419	0	0	0	133.256	318.071	79.5178	0.0002	0.000400461	94.25	5.36	Ce	d__Bacteria	p__Planctomycetota	c__Planctomycetia	Pirellulales	f__Thermoguttaceae	g__RUG369	s__RUG369 sp017937685
Ce13.567	MAG420	0	0	0	932.009	1506.5	376.624	<.0001	2.32495e-05	94.15	2.21	Ce	d__Bacteria	p__Bacteroidota	c__Bacteroidia	Bacteroidales	f__Rikenellaceae	g__Alistipes	s__Alistipes sp015060115
Ce13.573	MAG421	0	0	0	309.873	570.077	142.519	0.0035	0.00478424	98.66	0.4	Ce	d__Bacteria	p__Firmicutes_A	c__Clostridia	RUG12999	f__RUG12999	g__RGIG4103	s__RGIG4103 sp017502065
Ce13.575	MAG422	0	0	0	1563.22	2491.4	622.851	<.0001	8.28023e-06	56.58	4.92	Ce	d__Bacteria	p__Firmicutes_A	c__Clostridia	TANB77	f__CAG-508	g__Scatovivens	s__
Ce13.576	MAG423	0	0	0	1751.18	3431.23	857.807	<.0001	0.000161125	89.77	0	Ce	d__Bacteria	p__Firmicutes_A	c__Clostridia	UBA1381	f__UBA1381	g__Ornithomonoglobus	s__
Ce13.582	MAG424	13.3891	53.5563	13.3891	839.599	1303.7	325.926	<.0001	2.67214e-06	88.2	1.12	Ce	d__Bacteria	p__Firmicutes	c__Bacilli	RF39	f__UBA660	g__SIG204	s__
Ce13.583	MAG425	0	0	0	1078.88	1461.22	365.304	<.0001	2.32495e-05	98.67	4.11	Ce	d__Bacteria	p__Firmicutes	c__Bacilli	ML615J-28	f__CAG-313	g__CAG-313	s__
Ce13.586	MAG426	0	0	0	1150.72	934.079	233.52	<.0001	1.08446e-06	60.85	3.51	Ce	d__Bacteria	p__Firmicutes_A	c__Clostridia	Lachnospirales	f__Lachnospiraceae	g__RGIG8767	s__RGIG8767 sp017621115
Ce13.589	MAG427	0	0	0	561.991	436.552	109.138	<.0001	2.90589e-06	95.13	5.39	Ce	d__Bacteria	p__Firmicutes_A	c__Clostridia	Christensenellales	f__CAG-74	g__UBA11524	s__UBA11524 sp017502305
Ce13.590	MAG428	0	0	0	424.414	883.256	220.814	0.0006	0.000956857	95.03	3.47	Ce	d__Bacteria	p__Bacteroidota	c__Bacteroidia	Bacteroidales	f__Bacteroidaceae	g__HGM04593	s__HGM04593 sp017442185
Ce13.592	MAG429	0	0	0	391.285	221.589	55.3972	<.0001	1.08446e-06	69.65	5.51	Ce	d__Bacteria	p__Firmicutes_A	c__Clostridia	Christensenellales	f__CAG-74	g__SFMI01	s__
Ce13.593	MAG430	0	0	0	1671.42	5849.26	1462.31	0.0015	0.00216609	91.84	0	Ce	d__Bacteria	p__Verrucomicrobiota	c__Verrucomicrobiae	Verrucomicrobiales	f__Akkermansiaceae	g__Akkermansia	s__Akkermansia sp017435365
Ce13.594	MAG431	0	0	0	1063.08	825.437	206.359	<.0001	1.08446e-06	52.68	5.49	Ce	d__Bacteria	p__Firmicutes_A	c__Clostridia	Oscillospirales	f__Oscillospiraceae	g__Faecousia	s__
Ce14.4	MAG432	0	0	0	2087.07	5986.03	1496.51	<.0001	2.32495e-05	96.64	3.36	Ce	d__Bacteria	p__Firmicutes_A	c__Clostridia	Oscillospirales	f__Acutalibacteraceae	g__CAG-488	s__CAG-488 sp017415025
Ce14.9	MAG433	87.4764	112.217	28.0543	86.2326	229.43	57.3574	0.2174	0.236714	81.99	1.64	Ce	d__Bacteria	p__Firmicutes	c__Bacilli	Erysipelotrichales	f__Erysipelotrichaceae	g__Bulleidia	s__Bulleidia sp000701725
Ce14.27	MAG434	0	0	0	96.3065	116.334	29.0835	<.0001	8.28023e-06	61.7	2.94	Ce	d__Bacteria	p__Planctomycetota	c__Planctomycetia	Pirellulales	f__Thermoguttaceae	g__RUG369	s__RUG369 sp017937685
Ce14.56	MAG435	0	0	0	178.766	227.481	56.8703	<.0001	0.000161125	54.62	3.45	Ce	d__Bacteria	p__Firmicutes_A	c__Clostridia	Oscillospirales	f__Butyricicoccaceae	g__RGIG3513	s__RGIG3513 sp017408485
Ce14.64	MAG436	0	0	0	142.036	113.656	28.4141	<.0001	2.90589e-06	77.94	0.88	Ce	d__Bacteria	p__Firmicutes	c__Bacilli	Erysipelotrichales	f__Erysipelotrichaceae	g__SIG230	s__SIG230 sp015058845
Ce14.71	MAG437	0	0	0	73.1706	292.682	73.1706	0.3173	0.337339	81.1	2.36	Ce	d__Bacteria	p__Bacteroidota	c__Bacteroidia	Bacteroidales	f__Bacteroidaceae	g__Alloprevotella	s__Alloprevotella sp017461605
Ce14.73	MAG438	0	0	0	148.38	343.262	85.8154	0.0015	0.00216609	80.64	5.06	Ce	d__Bacteria	p__Firmicutes_A	c__Clostridia	Christensenellales	f__UBA1242	g__HGM11367	s__
Ce14.75	MAG439	0	0	0	789.783	1151.12	287.78	<.0001	8.28023e-06	80.57	3.02	Ce	d__Bacteria	p__Bacteroidota	c__Bacteroidia	Bacteroidales	f__G3-4614	g__Caccoplasma	s__Caccoplasma sp017416695
Ce14.81	MAG440	0	0	0	152.789	307.233	76.8084	0.0002	0.000400461	65.49	3.48	Ce	d__Archaea	p__Halobacteriota	c__Methanomicrobia	Methanomicrobiales	f__Methanocorpusculaceae	g__Methanocorpusculum	s__Methanocorpusculum sp017408885
Ce14.82	MAG441	0	0	0	181.558	667.138	166.785	0.0359	0.0419998	83.33	0.83	Ce	d__Bacteria	p__Actinobacteriota	c__Actinomycetia	Actinomycetales	f__Bifidobacteriaceae	g__RGIG1476	s__RGIG1476 sp017413255
Ce14.88	MAG442	0	0	0	439.592	652.254	163.063	0.0015	0.00216609	96.88	1.44	Ce	d__Bacteria	p__Bacteroidota	c__Bacteroidia	Bacteroidales	f__Rikenellaceae	g__Tidjanibacter	s__Tidjanibacter sp017396085
Ce14.108	MAG443	0	0	0	1147.57	572.651	143.163	<.0001	1.08446e-06	75.72	4.54	Ce	d__Bacteria	p__Firmicutes_A	c__Clostridia	Lachnospirales	f__Anaerotignaceae	g__Anaerotignum	s__Anaerotignum sp017442465
Ce14.115	MAG444	0	0	0	2004.14	1339.72	334.929	<.0001	1.08446e-06	96.87	1.01	Ce	d__Bacteria	p__Firmicutes_A	c__Clostridia	UMGS1840	f__UMGS1840	g__SIG452	s__
Ce14.117	MAG445	0	0	0	174.977	360.291	90.0727	<.0001	0.000161125	90.72	2.71	Ce	d__Bacteria	p__Firmicutes_A	c__Clostridia	Oscillospirales	f__Acutalibacteraceae	g__UBA5905	s__
Ce14.120	MAG446	0	0	0	2298.44	6504.11	1626.03	<.0001	2.32495e-05	100	3.39	Ce	d__Bacteria	p__Bacteroidota	c__Bacteroidia	Bacteroidales	f__Rikenellaceae	g__Alistipes	s__Alistipes sp017442365
Ce14.139	MAG447	0	0	0	49.4873	197.949	49.4873	0.3173	0.337339	54.51	1.36	Ce	d__Bacteria	p__Firmicutes_A	c__Clostridia	Oscillospirales	f__Acutalibacteraceae	g__RGIG3009	s__RGIG3009 sp017434985
Ce14.152	MAG448	0	0	0	1018.04	1370.54	342.636	0.0002	0.000400461	92.45	1.01	Ce	d__Bacteria	p__Firmicutes_A	c__Clostridia	UBA1381	f__UBA1381	g__Ornithomonoglobus	s__
Ce14.181	MAG449	0	0	0	236.924	523.377	130.844	0.0079	0.0101688	56.03	3.45	Ce	d__Bacteria	p__Firmicutes_B	c__Peptococcia	Peptococcales	f__Peptococcaceae	g__UBA7185	s__
Ce14.196	MAG450	0	0	0	1593.34	2748.52	687.13	<.0001	8.28023e-06	54.53	7.35	Ce	d__Bacteria	p__Firmicutes_A	c__Clostridia	TANB77	f__CAG-508	g__Scatovivens	s__
Ce14.214	MAG451	0	0	0	1233.06	2589.03	647.258	<.0001	8.28023e-06	92.76	4.62	Ce	d__Bacteria	p__Verrucomicrobiota	c__Verrucomicrobiae	Verrucomicrobiales	f__Akkermansiaceae	g__Akkermansia	s__Akkermansia sp015061985
Ce14.274	MAG452	59.4689	136.127	34.0317	1227.5	2653.09	663.272	<.0001	3.89811e-05	54.09	0	Ce	d__Bacteria	p__Firmicutes	c__Bacilli	RF39	f__UBA660	g__UMGS1613	s__
Ce14.312	MAG453	0	0	0	1861.83	2063	515.75	<.0001	1.08446e-06	68.54	2.57	Ce	d__Bacteria	p__Bacteroidota	c__Bacteroidia	Bacteroidales	f__UBA932	g__Cryptobacteroides	s__
Ce14.347	MAG454	0	0	0	1277.67	1628.99	407.249	<.0001	1.08446e-06	92.08	2.32	Ce	d__Bacteria	p__Firmicutes_A	c__Clostridia	Oscillospirales	f__Acutalibacteraceae	g__UBA737	s__
Ce14.355	MAG455	0	0	0	1041.26	1568.55	392.137	<.0001	6.30507e-05	95.27	1.72	Ce	d__Bacteria	p__Firmicutes_A	c__Clostridia	Lachnospirales	f__Lachnospiraceae	g__UBA3766	s__
Ce14.356	MAG456	960.664	2431.03	607.757	686.5	938.129	234.532	0.4173	0.438145	91.2	4.09	R	d__Archaea	p__Methanobacteriota	c__Methanobacteria	Methanobacteriales	f__Methanobacteriaceae	g__Methanobrevibacter_A	s__Methanobrevibacter_A thaueri_B
Ce14.428	MAG457	79.0115	82.6692	20.6673	871.411	1292.1	323.025	<.0001	2.20857e-05	74.56	3.51	Ce	d__Bacteria	p__Firmicutes	c__Bacilli	RF39	f__UBA660	g__UMGS1613	s__
Ce14.430	MAG458	425.979	980.007	245.002	514.194	998.261	249.565	0.2625	0.284465	82.87	7.28	Ce	d__Archaea	p__Methanobacteriota	c__Methanobacteria	Methanobacteriales	f__Methanobacteriaceae	g__Methanobrevibacter_A	s__
Ce14.431	MAG459	0	0	0	263.766	911	227.75	0.0737	0.0837988	89.04	0.67	Ce	d__Bacteria	p__Firmicutes_A	c__Clostridia	Oscillospirales	f__Acutalibacteraceae	g__	s__
Ce14.434	MAG460	0	0	0	305.772	696.751	174.188	0.0079	0.0101688	96.31	0.67	Ce	d__Bacteria	p__Firmicutes_A	c__Clostridia	Oscillospirales	f__Acutalibacteraceae	g__UMGS1976	s__UMGS1976 sp017399535
Ce14.446	MAG461	0	0	0	148.709	507.269	126.817	0.1508	0.165656	95.97	1.12	Ce	d__Bacteria	p__Firmicutes_A	c__Clostridia	UMGS1883	f__UMGS1540	g__SIG447	s__
Ce14.448	MAG462	0	0	0	454.702	561.433	140.358	<.0001	8.28023e-06	97.09	0.69	Ce	d__Bacteria	p__Firmicutes_A	c__Clostridia	Oscillospirales	f__Oscillospiraceae	g__Faecousia	s__
Ce14.449	MAG463	0	0	0	106.084	266.162	66.5406	0.0359	0.0419998	57.59	6.95	Ce	d__Bacteria	p__Firmicutes_A	c__Clostridia	Oscillospirales	f__Acutalibacteraceae	g__RGIG2206	s__
Ce14.454	MAG464	0	0	0	996.242	2363.91	590.978	<.0001	0.000161125	79.78	1.12	Ce	d__Bacteria	p__Firmicutes	c__Bacilli	RF39	f__UBA660	g__Coprovivens	s__Coprovivens sp015059245
Ce14.469	MAG465	57.4024	162.979	40.7448	129.781	380.232	95.0579	0.6769	0.69697	61.89	0.85	Ce	d__Bacteria	p__Patescibacteria	c__Saccharimonadia	Saccharimonadales	f__Nanosyncoccaceae	g__Nanosyncoccus	s__
Ce14.496	MAG466	535.355	257.053	64.2633	405.61	523.95	130.988	0.0159	0.0201623	95.11	3.87	R	d__Bacteria	p__Firmicutes_A	c__Clostridia	Lachnospirales	f__Lachnospiraceae	g__CAG-791	s__CAG-791 sp902785055
Ce14.502	MAG467	19.8943	79.5772	19.8943	346.377	1385.51	346.377	0.9642	0.9678	96.13	0.54	Ce	d__Bacteria	p__Bacteroidota	c__Bacteroidia	Bacteroidales	f__WCHB1-69	g__RUG11690	s__RUG11690 sp902771655
Ce14.504	MAG468	966.913	2467.13	616.782	848.765	2935.3	733.824	0.0963	0.108877	96.51	1.72	Ce	d__Bacteria	p__Bacteroidota	c__Bacteroidia	Bacteroidales	f__P3	g__UBA1217	s__UBA1217 sp017517715
Ce14.509	MAG469	0	0	0	3566.23	6962.5	1740.63	<.0001	1.08446e-06	90.74	6.9	Ce	d__Bacteria	p__Bacteroidota	c__Bacteroidia	Bacteroidales	f__UBA932	g__Cryptobacteroides	s__Cryptobacteroides sp017437125
Ce14.510	MAG470	0	0	0	2121.31	2947.56	736.89	<.0001	1.08446e-06	84.01	7.01	Ce	d__Bacteria	p__Bacteroidota	c__Bacteroidia	Bacteroidales	f__F082	g__Limimorpha	s__Limimorpha sp015061365
Ce14.514	MAG471	0	0	0	179.198	472.478	118.119	0.0079	0.0101688	94.88	4.93	Ce	d__Bacteria	p__Firmicutes_A	c__Clostridia	Oscillospirales	f__Acutalibacteraceae	g__Ruminococcus_E	s__
Ce14.517	MAG472	0	0	0	115.839	463.354	115.839	0.3173	0.337339	88.37	2.14	Ce	d__Bacteria	p__Firmicutes_A	c__Clostridia	Oscillospirales	f__Acutalibacteraceae	g__SIG607	s__
Ce14.519	MAG473	0	0	0	880.149	477.265	119.316	<.0001	1.08446e-06	59.11	8.78	Ce	d__Bacteria	p__Firmicutes_A	c__Clostridia	Oscillospirales	f__Oscillospiraceae	g__Faecousia	s__
Ce14.520	MAG474	0	0	0	179.826	444.028	111.007	0.0079	0.0101688	98.64	3.96	Ce	d__Bacteria	p__Firmicutes_A	c__Clostridia	Oscillospirales	f__JAAYXM01	g__RGIG7332	s__
Ce14.523	MAG475	0	0	0	795.708	2847.92	711.979	0.0035	0.00478424	90.76	0.34	Ce	d__Bacteria	p__Firmicutes_A	c__Clostridia	Oscillospirales	f__CAG-272	g__RGIG8775	s__
Ce14.524	MAG476	0	0	0	419.404	366.668	91.667	<.0001	1.08446e-06	84.14	4.18	Ce	d__Bacteria	p__Firmicutes_A	c__Clostridia	Peptostreptococcales	f__Anaerovoracaceae	g__Copromorpha	s__
Ce14.525	MAG477	0	0	0	2682.81	5797.61	1449.4	0.0079	0.0101688	96.42	1.12	Ce	d__Bacteria	p__Firmicutes_A	c__Clostridia	Oscillospirales	f__Acutalibacteraceae	g__Ruminococcus_E	s__Ruminococcus_E sp017411835
Ce14.530	MAG478	0	0	0	214.042	377.952	94.488	0.0006	0.000956857	91.97	2.35	Ce	d__Bacteria	p__Firmicutes_A	c__Clostridia	Oscillospirales	f__CAG-272	g__CAG-272	s__CAG-272 sp017621655
Ce14.533	MAG479	0	0	0	844.317	1253.97	313.492	<.0001	0.000161125	88.52	0.95	Ce	d__Bacteria	p__Bacteroidota	c__Bacteroidia	Bacteroidales	f__UBA932	g__Cryptobacteroides	s__
Ce14.536	MAG480	1161.91	2745.23	686.307	174.157	367.493	91.8733	0.917	0.931069	87.56	2.66	R	d__Bacteria	p__Firmicutes_A	c__Clostridia	Saccharofermentanales	f__Saccharofermentanaceae	g__Saccharofermentans	s__Saccharofermentans sp017427465
Ce14.537	MAG481	0	0	0	300.437	508.41	127.103	0.0002	0.000400461	90.54	1.6	Ce	d__Bacteria	p__Bacteroidota	c__Bacteroidia	Bacteroidales	f__UBA932	g__Egerieousia	s__Egerieousia sp015060445
Ce14.540	MAG482	0	0	0	303.87	217.807	54.4519	<.0001	1.08446e-06	54.27	3.23	Ce	d__Bacteria	p__Firmicutes_B	c__Peptococcia	Peptococcales	f__Peptococcaceae	g__RGIG6463	s__RGIG6463 sp017532485
Ce14.543	MAG483	15.2926	41.9645	10.4911	772.064	1600.3	400.076	<.0001	8.00812e-06	77.45	3.37	Ce	d__Bacteria	p__Firmicutes	c__Bacilli	RF39	f__UBA660	g__UMGS1613	s__
Ce14.547	MAG484	0	0	0	4160.9	6768.55	1692.14	<.0001	8.28023e-06	79.2	1.9	Ce	d__Bacteria	p__Bacteroidota	c__Bacteroidia	Bacteroidales	f__UBA932	g__Cryptobacteroides	s__Cryptobacteroides sp015060395
Ce14.548	MAG485	0	0	0	668.414	485.295	121.324	<.0001	1.08446e-06	61.26	8.72	Ce	d__Bacteria	p__Firmicutes_A	c__Clostridia	Oscillospirales	f__Oscillospiraceae	g__Faecousia	s__
Ce14.549	MAG486	0	0	0	397.315	652.795	163.199	<.0001	8.28023e-06	93.13	4.3	Ce	d__Bacteria	p__Firmicutes_A	c__Clostridia	Christensenellales	f__CAG-74	g__Limiplasma	s__Limiplasma sp017937655
Ce14.551	MAG487	0	0	0	2235.24	5538.18	1384.55	<.0001	1.08446e-06	88.76	3.42	Ce	d__Bacteria	p__Firmicutes	c__Bacilli	RF39	f__UBA660	g__UMGS1124	s__
Ce14.555	MAG488	0	0	0	815.731	815.998	203.999	<.0001	1.08446e-06	98.12	0.19	Ce	d__Bacteria	p__Bacteroidota	c__Bacteroidia	Bacteroidales	f__Rikenellaceae	g__Alistipes	s__Alistipes sp017481925
Ce14.556	MAG489	0	0	0	701.778	575.122	143.781	<.0001	1.08446e-06	84.93	4.03	Ce	d__Bacteria	p__Firmicutes_A	c__Clostridia	Oscillospirales	f__Ruminococcaceae	g__RGIG3102	s__RGIG3102 sp017400025
Ce14.560	MAG490	58.2738	69.2005	17.3001	1403.47	2716.21	679.053	<.0001	1.44871e-05	66.46	3.37	Ce	d__Bacteria	p__Firmicutes	c__Bacilli	RF39	f__UBA660	g__UMGS1613	s__
Ce14.561	MAG491	0	0	0	521.566	910.534	227.633	0.0006	0.000956857	91.68	0.81	Ce	d__Bacteria	p__Firmicutes_A	c__Clostridia	UBA1381	f__UBA1381	g__RGIG9115	s__
Ce14.562	MAG492	0	0	0	201.943	350.542	87.6355	0.0015	0.00216609	71.21	0.47	Ce	d__Bacteria	p__Firmicutes_A	c__Clostridia	Oscillospirales	f__Acutalibacteraceae	g__SIG589	s__
Ce14.563	MAG493	0	0	0	109.598	358.091	89.5227	0.0737	0.0837988	50.17	2.01	Ce	d__Bacteria	p__Firmicutes_A	c__Clostridia	Oscillospirales	f__QAKW01	g__RGIG9041	s__
Ce14.564	MAG494	0	0	0	6863.28	9789.41	2447.35	<.0001	1.08446e-06	96.96	0.51	Ce	d__Bacteria	p__Bacteroidota	c__Bacteroidia	Bacteroidales	f__Rikenellaceae	g__Alistipes	s__Alistipes sp015060115
Ce14.567	MAG495	1611.63	4012.02	1003	259.819	481.698	120.425	0.0774	0.0877474	99.2	0	R	d__Bacteria	p__Firmicutes_A	c__Clostridia	Saccharofermentanales	f__Saccharofermentanaceae	g__Saccharofermentans	s__Saccharofermentans sp015069205
Ce14.569	MAG496	0	0	0	394.771	580.522	145.13	0.0002	0.000400461	82.18	2.99	Ce	d__Bacteria	p__Firmicutes_A	c__Clostridia	Lachnospirales	f__Lachnospiraceae	g__RGIG6307	s__
Ce14.570	MAG497	14.595	39.9159	9.97898	1219.54	2099.7	524.926	0.0044	0.00594057	96.4	2.15	Ce	d__Bacteria	p__Bacteroidota	c__Bacteroidia	Bacteroidales	f__WCHB1-69	g__UBA1756	s__UBA1756 sp017506175
Ce14.572	MAG498	0	0	0	1659.24	1709.14	427.285	<.0001	1.08446e-06	95.57	7.68	Ce	d__Bacteria	p__Firmicutes_C	c__Negativicutes	Acidaminococcales	f__Acidaminococcaceae	g__Phascolarctobacterium_A	s__Phascolarctobacterium_A sp017623055
Ce14.573	MAG499	167.314	163.608	40.9019	127.846	211.484	52.8711	0.0794	0.0900189	77.88	4.28	R	d__Bacteria	p__Actinobacteriota	c__Coriobacteriia	Coriobacteriales	f__Atopobiaceae	g__RUG721	s__RUG721 sp900321745
Ce14.575	MAG500	0	0	0	1279.74	997.882	249.471	<.0001	1.08446e-06	59.8	5.33	Ce	d__Bacteria	p__Bacteroidota	c__Bacteroidia	Bacteroidales	f__UBA932	g__Cryptobacteroides	s__
Ce14.578	MAG501	106.551	178.708	44.6771	443.681	1495.88	373.97	0.8381	0.85587	94.3	2.08	Ce	d__Bacteria	p__Firmicutes_A	c__Clostridia	Oscillospirales	f__Acutalibacteraceae	g__Ruminococcus_E	s__
Ce14.582	MAG502	11.3045	24.8169	6.20423	112.956	451.826	112.956	0.3416	0.361582	83.62	5.56	Ce	d__Bacteria	p__Cyanobacteria	c__Vampirovibrionia	Gastranaerophilales	f__Gastranaerophilaceae	g__UBA1221	s__
Ce14.583	MAG503	0	0	0	359.861	830.429	207.607	0.0035	0.00478424	80	0	Ce	d__Bacteria	p__Firmicutes	c__Bacilli	ML615J-28	f__CAG-313	g__UBA1737	s__UBA1737 sp017398545
Ce14.584	MAG504	0	0	0	543.745	1876.22	469.055	0.0035	0.00478424	90.72	6.23	Ce	d__Bacteria	p__Firmicutes_A	c__Clostridia	Oscillospirales	f__Acutalibacteraceae	g__UBA737	s__UBA737 sp015066515
Ce14.586	MAG505	0	0	0	253.954	698.251	174.563	0.1508	0.165656	93.74	0	Ce	d__Bacteria	p__Firmicutes_A	c__Clostridia	Oscillospirales	f__Acutalibacteraceae	g__SIG565	s__
Ce14.587	MAG506	0	0	0	340.384	701.497	175.374	0.0006	0.000956857	93.4	4.63	Ce	d__Bacteria	p__Firmicutes_A	c__Clostridia	Oscillospirales	f__Acutalibacteraceae	g__SFWF01	s__
Ce14.591	MAG507	0	0	0	112.706	385.775	96.4437	0.1508	0.165656	91.5	0	Ce	d__Bacteria	p__Firmicutes_A	c__Clostridia	Oscillospirales	f__CAG-272	g__UMGS902	s__
Ce14.594	MAG508	0	0	0	1402.8	3029.05	757.263	<.0001	2.90589e-06	53.1	5.17	Ce	d__Bacteria	p__Bacteroidota	c__Bacteroidia	Bacteroidales	f__UBA932	g__Cryptobacteroides	s__
Ce14.608	MAG509	0	0	0	385.616	195.585	48.8962	<.0001	1.08446e-06	64.13	3.14	Ce	d__Bacteria	p__Firmicutes_A	c__Clostridia	Oscillospirales	f__Oscillospiraceae	g__RGIG1893	s__RGIG1893 sp017397075
Ce15.13	MAG510	0	0	0	155.252	233.38	58.3449	0.0006	0.000956857	58.16	0.08	Ce	d__Bacteria	p__Firmicutes_A	c__Clostridia	UBA1381	f__UBA1381	g__Ornithomonoglobus	s__
Ce15.19	MAG511	0	0	0	435.299	1077.51	269.378	0.0006	0.000956857	76	1.61	Ce	d__Bacteria	p__Firmicutes_A	c__Clostridia	UMGS1840	f__HGM11507	g__SIG450	s__SIG450 sp015068525
Ce15.28	MAG512	0	0	0	684.65	1560.54	390.135	0.0006	0.000956857	63.71	6.19	Ce	d__Bacteria	p__Firmicutes_A	c__Clostridia	Oscillospirales	f__Acutalibacteraceae	g__UBA6857	s__
Ce15.30	MAG513	0	0	0	2536.25	4759.79	1189.95	<.0001	2.32495e-05	91.85	1.36	Ce	d__Bacteria	p__Bacteroidota	c__Bacteroidia	Bacteroidales	f__F082	g__Limimorpha	s__
Ce15.35	MAG514	0	0	0	365.685	224.67	56.1676	<.0001	1.08446e-06	65.67	5.52	Ce	d__Bacteria	p__Firmicutes_A	c__Clostridia	Oscillospirales	f__Butyricicoccaceae	g__RGIG1902	s__RGIG1902 sp017407765
Ce15.38	MAG515	0	0	0	6442.12	7336.4	1834.1	<.0001	1.08446e-06	91.29	1.69	Ce	d__Bacteria	p__Bacteroidota	c__Bacteroidia	Bacteroidales	f__UBA932	g__Cryptobacteroides	s__
Ce15.44	MAG516	0	0	0	183.623	459.869	114.967	0.0079	0.0101688	92.6	0.34	Ce	d__Bacteria	p__Firmicutes_A	c__Clostridia	Oscillospirales	f__Acutalibacteraceae	g__CAG-964	s__
Ce15.52	MAG517	0	0	0	370.2	630.927	157.732	<.0001	8.28023e-06	90.56	6.73	Ce	d__Bacteria	p__Firmicutes_A	c__Clostridia	Oscillospirales	f__CAG-272	g__RGIG7300	s__
Ce15.66	MAG518	0	0	0	354.454	345.454	86.3635	<.0001	8.28023e-06	63.16	2.91	Ce	d__Bacteria	p__Firmicutes	c__Bacilli	Erysipelotrichales	f__Erysipelotrichaceae	g__Breznakia	s__
Ce15.68	MAG519	0	0	0	349.699	316.069	79.0173	<.0001	2.90589e-06	92.86	1.76	Ce	d__Bacteria	p__Bacteroidota	c__Bacteroidia	Bacteroidales	f__UBA932	g__Egerieousia	s__Egerieousia sp017935505
Ce15.69	MAG520	0	0	0	84.4072	215.409	53.8522	0.0359	0.0419998	56.71	3.05	Ce	d__Bacteria	p__Firmicutes_A	c__Clostridia	Oscillospirales	f__Acutalibacteraceae	g__UBA737	s__
Ce15.75	MAG521	0	0	0	212.073	331.803	82.9507	<.0001	6.30507e-05	91.28	2.43	Ce	d__Bacteria	p__Firmicutes_A	c__Clostridia	Oscillospirales	f__Acutalibacteraceae	g__UMGS1484	s__
Ce15.88	MAG522	0	0	0	113.557	353.418	88.3545	0.0359	0.0419998	90.76	5.59	Ce	d__Bacteria	p__Firmicutes_A	c__Clostridia	Oscillospirales	f__CAG-272	g__RGIG8775	s__RGIG8775 sp015064795
Ce15.110	MAG523	0	0	0	336.89	291.254	72.8136	<.0001	1.08446e-06	93.23	1.95	Ce	d__Bacteria	p__Firmicutes_A	c__Clostridia	Oscillospirales	f__Butyricicoccaceae	g__SIG471	s__SIG471 sp017441945
Ce15.115	MAG524	0	0	0	323.705	389.705	97.4263	<.0001	0.000161125	94.62	3.33	Ce	d__Bacteria	p__Bacteroidota	c__Bacteroidia	Bacteroidales	f__Rikenellaceae	g__Alistipes	s__Alistipes sp017398045
Ce15.117	MAG525	0	0	0	176.322	341.256	85.314	0.0015	0.00216609	86.82	3.91	Ce	d__Bacteria	p__Firmicutes_A	c__Clostridia	Oscillospirales	f__UMGS1783	g__	s__
Ce15.122	MAG526	0	0	0	218.754	206.35	51.5876	<.0001	2.32495e-05	63.78	0.98	Ce	d__Archaea	p__Halobacteriota	c__Methanomicrobia	Methanomicrobiales	f__Methanocorpusculaceae	g__Methanocorpusculum	s__Methanocorpusculum sp017622255
Ce15.126	MAG527	0	0	0	421.22	646.241	161.56	<.0001	6.30507e-05	94.9	2.01	Ce	d__Bacteria	p__Firmicutes_A	c__Clostridia	Oscillospirales	f__CAG-382	g__RGIG5579	s__
Ce15.127	MAG528	0	0	0	320.68	316.493	79.1231	<.0001	6.30507e-05	81.53	2.22	Ce	d__Bacteria	p__Actinobacteriota	c__Actinomycetia	Actinomycetales	f__Bifidobacteriaceae	g__RGIG1476	s__RGIG1476 sp017413255
Ce15.128	MAG529	0	0	0	106.17	356.822	89.2056	0.0359	0.0419998	95.08	1.34	Ce	d__Bacteria	p__Firmicutes_A	c__Clostridia	Oscillospirales	f__QAKW01	g__QAKW01	s__
Ce15.134	MAG530	0	0	0	388.327	476.313	119.078	<.0001	8.28023e-06	79.32	9.49	Ce	d__Bacteria	p__Bacteroidota	c__Bacteroidia	Bacteroidales	f__Rikenellaceae	g__Alistipes	s__Alistipes sp017465605
Ce15.135	MAG531	0	0	0	368.151	503.637	125.909	<.0001	6.30507e-05	73.28	6.26	Ce	d__Bacteria	p__Firmicutes_A	c__Clostridia	Christensenellales	f__Borkfalkiaceae	g__UBA4636	s__UBA4636 sp017507595
Ce15.165	MAG532	0	0	0	323.73	566.775	141.694	0.0015	0.00216609	84.64	6.69	Ce	d__Bacteria	p__Verrucomicrobiota	c__Verrucomicrobiae	Verrucomicrobiales	f__Akkermansiaceae	g__Akkermansia	s__
Ce15.355	MAG533	0	0	0	320.453	133.113	33.2783	<.0001	1.08446e-06	53.28	6.9	Ce	d__Bacteria	p__Firmicutes_A	c__Clostridia	Peptostreptococcales	f__Anaerovoracaceae	g__RGIG7444	s__
Ce15.397	MAG534	0	0	0	2154.02	1461.7	365.426	<.0001	1.08446e-06	54.03	6	Ce	d__Bacteria	p__Firmicutes_A	c__Clostridia	Lachnospirales	f__Lachnospiraceae	g__Faecalimonas	s__
Ce15.398	MAG535	0	0	0	1228.83	696.547	174.137	<.0001	1.08446e-06	73.09	7.24	Ce	d__Bacteria	p__Firmicutes_A	c__Clostridia	Lachnospirales	f__Anaerotignaceae	g__Anaerotignum	s__Anaerotignum sp017442465
Ce15.404	MAG536	331.737	493.408	123.352	744.749	751.086	187.771	0.0416	0.0487076	93.92	6.53	Ce	d__Archaea	p__Methanobacteriota	c__Methanobacteria	Methanobacteriales	f__Methanobacteriaceae	g__Methanobrevibacter_A	s__Methanobrevibacter_A sp900314695
Ce15.405	MAG537	0	0	0	409.014	1070.52	267.631	0.0015	0.00216609	88.14	1.12	Ce	d__Bacteria	p__Bacteroidota	c__Bacteroidia	Bacteroidales	f__Bacteroidaceae	g__HGM04593	s__HGM04593 sp017416705
Ce15.423	MAG538	0	0	0	364.241	738.226	184.557	<.0001	0.000161125	91.28	1.92	Ce	d__Bacteria	p__Firmicutes_A	c__Clostridia	Oscillospirales	f__Oscillospiraceae	g__RGIG2163	s__
Ce15.432	MAG539	581.325	647.786	161.946	236.359	362.154	90.5386	0.0047	0.00627214	57.95	3.59	R	d__Bacteria	p__Firmicutes_A	c__Clostridia	Oscillospirales	f__Oscillospiraceae	g__Limivicinus	s__Limivicinus sp002450075
Ce15.433	MAG540	0	0	0	408.903	535.799	133.95	<.0001	2.32495e-05	67.18	9.65	Ce	d__Bacteria	p__Cyanobacteria	c__Vampirovibrionia	Gastranaerophilales	f__Gastranaerophilaceae	g__RGIG2134	s__
Ce15.436	MAG541	0	0	0	502.862	1141.42	285.354	<.0001	6.30507e-05	79.48	4.03	Ce	d__Bacteria	p__Firmicutes_A	c__Clostridia	UMGS1883	f__UMGS1883	g__UMGS1883	s__
Ce15.440	MAG542	0	0	0	329.35	393.77	98.4425	<.0001	2.32495e-05	70.47	2.01	Ce	d__Bacteria	p__Firmicutes_A	c__Clostridia	UBA1381	f__UBA1381	g__RGIG9115	s__
Ce15.441	MAG543	0	0	0	281.419	296.899	74.2247	<.0001	2.32495e-05	56.67	4.98	Ce	d__Bacteria	p__Firmicutes_A	c__Clostridia	Oscillospirales	f__Acutalibacteraceae	g__UMGS1279	s__UMGS1279 sp017397065
Ce15.443	MAG544	0	0	0	385.056	234.961	58.7402	<.0001	1.08446e-06	68.37	2.69	Ce	d__Bacteria	p__Firmicutes_B	c__Peptococcia	Peptococcales	f__Peptococcaceae	g__QAKL01	s__
Ce15.446	MAG545	0	0	0	1228.49	462.754	115.688	<.0001	1.08446e-06	52.08	1.72	Ce	d__Bacteria	p__Firmicutes_A	c__Clostridia	Oscillospirales	f__Butyricicoccaceae	g__UBA4644	s__
Ce15.447	MAG546	0	0	0	131.596	99.7782	24.9445	<.0001	2.90589e-06	68.34	1.89	Ce	d__Bacteria	p__Firmicutes	c__Bacilli	Erysipelotrichales	f__Erysipelotrichaceae	g__SIG230	s__SIG230 sp015058845
Ce15.448	MAG547	0	0	0	830.496	889.213	222.303	<.0001	2.90589e-06	61.72	5.26	Ce	d__Bacteria	p__Firmicutes_A	c__Clostridia	UBA1381	f__UBA1381	g__UBA1738	s__
Ce15.451	MAG548	0	0	0	302.96	211.203	52.8009	<.0001	1.08446e-06	55.42	7.74	Ce	d__Bacteria	p__Firmicutes	c__Bacilli	Erysipelotrichales	f__Erysipelotrichaceae	g__RGIG4607	s__
Ce15.470	MAG549	0	0	0	1420.87	1172.01	293.001	<.0001	1.08446e-06	72.63	4.53	Ce	d__Bacteria	p__Firmicutes_A	c__Clostridia	Lachnospirales	f__Lachnospiraceae	g__RGIG8767	s__RGIG8767 sp017621115
Ce15.472	MAG550	0	0	0	1243.92	1756.8	439.199	<.0001	1.08446e-06	60.88	1.96	Ce	d__Bacteria	p__Firmicutes_A	c__Clostridia	Lachnospirales	f__Lachnospiraceae	g__Faecalimonas	s__
Ce15.484	MAG551	0	0	0	233.738	414.582	103.645	<.0001	0.000161125	84.57	0.73	Ce	d__Bacteria	p__Firmicutes_A	c__Clostridia	Oscillospirales	f__CAG-382	g__SIG622	s__SIG622 sp015065225
Ce15.488	MAG552	0	0	0	624.314	1494.35	373.587	0.0035	0.00478424	89.23	0.72	Ce	d__Bacteria	p__Verrucomicrobiota	c__Verrucomicrobiae	Verrucomicrobiales	f__Akkermansiaceae	g__Akkermansia	s__Akkermansia sp017415555
Ce15.494	MAG553	0	0	0	764.141	1173.97	293.493	<.0001	6.30507e-05	82.95	0.22	Ce	d__Bacteria	p__Firmicutes_A	c__Clostridia	Oscillospirales	f__Acutalibacteraceae	g__CAG-488	s__CAG-488 sp017415025
Ce15.499	MAG554	0	0	0	766.996	728.648	182.162	<.0001	1.08446e-06	93.76	4.7	Ce	d__Bacteria	p__Firmicutes_A	c__Clostridia	Oscillospirales	f__Ruminococcaceae	g__RGIG3102	s__RGIG3102 sp017436575
Ce15.502	MAG555	0	0	0	178.877	242.55	60.6374	0.0002	0.000400461	71.53	0.88	Ce	d__Bacteria	p__Firmicutes_A	c__Clostridia	Oscillospirales	f__CAG-382	g__RGIG6353	s__RGIG6353 sp017439965
Ce15.508	MAG556	0	0	0	303.321	690.064	172.516	0.0359	0.0419998	72.52	0.05	Ce	d__Bacteria	p__Bacteroidota	c__Bacteroidia	Bacteroidales	f__Muribaculaceae	g__RGIG4079	s__RGIG4079 sp017409345
Ce15.509	MAG557	0	0	0	573.748	878.69	219.672	0.0002	0.000400461	94.3	0.67	Ce	d__Bacteria	p__Firmicutes_A	c__Clostridia	Oscillospirales	f__Acutalibacteraceae	g__UBA737	s__UBA737 sp017513195
Ce15.510	MAG558	0	0	0	747.01	315.274	78.8185	<.0001	1.08446e-06	60.55	2.24	Ce	d__Bacteria	p__Firmicutes_A	c__Clostridia	Lachnospirales	f__Lachnospiraceae	g__SZUA-448	s__
Ce15.513	MAG559	0	0	0	416.738	678.497	169.624	<.0001	6.30507e-05	93.35	0	Ce	d__Bacteria	p__Firmicutes_A	c__Clostridia	Oscillospirales	f__Ruminococcaceae	g__Faeciplasma	s__
Ce15.514	MAG560	0	0	0	178.599	374.755	93.6887	0.0006	0.000956857	90.59	0.34	Ce	d__Bacteria	p__Firmicutes_A	c__Clostridia	UMGS1810	f__UMGS1810	g__RGIG1828	s__
Ce15.517	MAG561	0	0	0	538.465	654.939	163.735	<.0001	0.000161125	91.39	2.01	Ce	d__Bacteria	p__Firmicutes_A	c__Clostridia	Oscillospirales	f__Ruminococcaceae	g__RGIG8367	s__
Ce15.519	MAG562	0	0	0	1477.93	1475.95	368.989	<.0001	1.08446e-06	61.72	1.75	Ce	d__Bacteria	p__Firmicutes_A	c__Clostridia	Lachnospirales	f__Lachnospiraceae	g__HGM12587	s__
Ce15.521	MAG563	0	0	0	365.343	491.891	122.973	<.0001	2.90589e-06	79.68	1.34	Ce	d__Bacteria	p__Firmicutes_A	c__Clostridia	Oscillospirales	f__Ruminococcaceae	g__RGIG3102	s__
Ce15.522	MAG564	0	0	0	611.735	1281.42	320.356	<.0001	8.28023e-06	96.73	2.01	Ce	d__Bacteria	p__Firmicutes_A	c__Clostridia	Oscillospirales	f__CAG-382	g__UMGS1387	s__
Ce15.523	MAG565	849.787	2159.22	539.804	579.405	674.697	168.674	0.308	0.33206	81.73	2.52	R	d__Archaea	p__Methanobacteriota	c__Methanobacteria	Methanobacteriales	f__Methanobacteriaceae	g__Methanobrevibacter_A	s__Methanobrevibacter_A thaueri_B
Ce15.527	MAG566	0	0	0	188.159	296.049	74.0122	0.0015	0.00216609	69.24	1.34	Ce	d__Bacteria	p__Firmicutes_A	c__Clostridia	Oscillospirales	f__Acutalibacteraceae	g__RGIG3009	s__
Ce15.529	MAG567	0	0	0	585.327	363.121	90.7803	<.0001	1.08446e-06	88.87	5.53	Ce	d__Bacteria	p__Firmicutes_A	c__Clostridia	Peptostreptococcales	f__Anaerovoracaceae	g__RGIG446	s__
Ce15.530	MAG568	0	0	0	542.477	730.289	182.572	<.0001	6.30507e-05	90.69	5.7	Ce	d__Bacteria	p__Firmicutes_A	c__Clostridia	UMGS1883	f__UMGS1883	g__UMGS1883	s__
Ce15.533	MAG569	0	0	0	633.922	735.51	183.877	<.0001	1.08446e-06	86.31	0.96	Ce	d__Bacteria	p__Bacteroidota	c__Bacteroidia	Bacteroidales	f__Rikenellaceae	g__Alistipes	s__Alistipes sp017481925
Ce15.534	MAG570	0	0	0	749.772	1433.44	358.361	<.0001	2.90589e-06	92.31	0.7	Ce	d__Bacteria	p__Firmicutes_A	c__Clostridia	UBA1212	f__UBA1255	g__Egerieisoma	s__Egerieisoma sp017622825
Ce15.538	MAG571	0	0	0	1085.42	981.567	245.392	<.0001	1.08446e-06	58.51	6.34	Ce	d__Bacteria	p__Firmicutes_C	c__Negativicutes	Acidaminococcales	f__Acidaminococcaceae	g__Phascolarctobacterium_A	s__Phascolarctobacterium_A sp017623055
Ce15.541	MAG572	0	0	0	311.756	201.794	50.4484	<.0001	1.08446e-06	78.09	2.84	Ce	d__Bacteria	p__Firmicutes_A	c__Clostridia	Peptostreptococcales	f__Anaerovoracaceae	g__QAKD01	s__QAKD01 sp015058155
Ce15.542	MAG573	0	0	0	655.214	1282.82	320.704	0.0035	0.00478424	94.74	0	Ce	d__Bacteria	p__Firmicutes_A	c__Clostridia	Oscillospirales	f__CAG-382	g__UMGS882	s__
Ce15.543	MAG574	0	0	0	582.577	390.756	97.6891	<.0001	1.08446e-06	59.82	3.24	Ce	d__Bacteria	p__Firmicutes_A	c__Clostridia	Oscillospirales	f__Ruminococcaceae	g__Fimivivens	s__
Ce15.546	MAG575	92.036	96.6	24.15	853.357	911.011	227.753	<.0001	6.61504e-06	73.57	2.14	Ce	d__Bacteria	p__Firmicutes_A	c__Clostridia	TANB77	f__CAG-508	g__CAG-492	s__
Ce15.548	MAG576	0	0	0	1166.62	2737.05	684.263	<.0001	0.000161125	91.72	0	Ce	d__Bacteria	p__Firmicutes_A	c__Clostridia	Monoglobales	f__Monoglobaceae	g__UMGS1820	s__
Ce15.549	MAG577	0	0	0	672.971	374.269	93.5673	<.0001	1.08446e-06	95.93	0.73	Ce	d__Bacteria	p__Firmicutes_A	c__Clostridia	Oscillospirales	f__Oscillospiraceae	g__ER4	s__
Ce15.551	MAG578	0	0	0	1443.02	2983.12	745.781	<.0001	1.08446e-06	96.27	1.48	Ce	d__Bacteria	p__Firmicutes_A	c__Clostridia	Oscillospirales	f__Oscillospiraceae	g__Faecousia	s__
Ce15.553	MAG579	0	0	0	508.108	893.342	223.336	<.0001	6.30507e-05	77.53	4.49	Ce	d__Bacteria	p__Firmicutes	c__Bacilli	RF39	f__UBA660	g__UMGS1124	s__
Ce15.554	MAG580	0	0	0	706.936	1141.55	285.387	<.0001	2.90589e-06	53.75	1.75	Ce	d__Bacteria	p__Firmicutes_A	c__Clostridia	Lachnospirales	f__Lachnospiraceae	g__Faecalimonas	s__
Ce15.555	MAG581	0	0	0	400.608	994.599	248.65	<.0001	0.000161125	93.96	0.67	Ce	d__Bacteria	p__Firmicutes_A	c__Clostridia	Oscillospirales	f__Acutalibacteraceae	g__UBA737	s__
Ce15.556	MAG582	0	0	0	382.666	517.566	129.391	<.0001	0.000161125	84.65	1.03	Ce	d__Bacteria	p__Bacteroidota	c__Bacteroidia	Bacteroidales	f__Bacteroidaceae	g__HGM04593	s__HGM04593 sp015060835
Ce15.557	MAG583	0	0	0	380.772	681.494	170.373	0.0002	0.000400461	91.39	1.33	Ce	d__Bacteria	p__Firmicutes	c__Bacilli	RF39	f__UBA660	g__	s__
Ce15.558	MAG584	821.214	1920.98	480.245	1381.22	2973.29	743.322	0.651	0.671166	70.77	0	Ce	d__Bacteria	p__Patescibacteria	c__Saccharimonadia	Saccharimonadales	f__Nanosyncoccaceae	g__Nanosyncoccus	s__
Ce15.560	MAG585	0	0	0	2043.24	3700.8	925.199	<.0001	8.28023e-06	97.33	7.05	Ce	d__Bacteria	p__Firmicutes	c__Bacilli	ML615J-28	f__CAG-698	g__CAG-698	s__
Ce15.561	MAG586	0	0	0	2361.74	7364.04	1841.01	0.0015	0.00216609	68.06	3.89	Ce	d__Bacteria	p__Firmicutes_A	c__Clostridia	Monoglobales	f__Monoglobaceae	g__UMGS1326	s__
Ce15.562	MAG587	0	0	0	7649.12	16169.6	4042.4	<.0001	0.000161125	98.08	0.48	Ce	d__Bacteria	p__Bacteroidota	c__Bacteroidia	Bacteroidales	f__Rikenellaceae	g__Alistipes	s__Alistipes sp015059785
Ce15.566	MAG588	0	0	0	264.521	457.741	114.435	0.0006	0.000956857	88.69	0.22	Ce	d__Bacteria	p__Firmicutes_A	c__Clostridia	Oscillospirales	f__Ruminococcaceae	g__Ruminococcus	s__Ruminococcus sp017523285
Ce15.567	MAG589	0	0	0	219.483	130.083	32.5209	<.0001	1.08446e-06	86.32	2.57	Ce	d__Bacteria	p__Firmicutes_A	c__Clostridia	Oscillospirales	f__Ruminococcaceae	g__UBA3818	s__UBA3818 sp017408855
Ce15.570	MAG590	0	0	0	996.787	776.969	194.242	<.0001	1.08446e-06	88.35	6.53	Ce	d__Bacteria	p__Firmicutes_A	c__Clostridia	Lachnospirales	f__Lachnospiraceae	g__UBA3766	s__UBA3766 sp017622505
Ce15.571	MAG591	0	0	0	963.408	2272.26	568.066	<.0001	6.30507e-05	88.86	0.69	Ce	d__Bacteria	p__Firmicutes_A	c__Clostridia	Oscillospirales	f__CAG-382	g__SIG622	s__
Ce15.573	MAG592	0	0	0	418.722	406.083	101.521	<.0001	1.08446e-06	55.67	1.42	Ce	d__Bacteria	p__Firmicutes_A	c__Clostridia	Peptostreptococcales	f__Anaerovoracaceae	g__Fimisoma	s__Fimisoma sp017440275
Ce15.579	MAG593	0	0	0	1213.12	2289.55	572.387	<.0001	2.90589e-06	85.01	3.36	Ce	d__Bacteria	p__Firmicutes_A	c__Clostridia	Oscillospirales	f__CAG-272	g__RGIG1995	s__
Ce15.585	MAG594	0	0	0	655.178	579.701	144.925	<.0001	2.90589e-06	77.53	3.64	Ce	d__Bacteria	p__Firmicutes_A	c__Clostridia	Lachnospirales	f__Lachnospiraceae	g__RGIG423	s__
Ce15.586	MAG595	0	0	0	743.862	877.761	219.44	<.0001	2.90589e-06	85.96	4.81	Ce	d__Bacteria	p__Bacteroidota	c__Bacteroidia	Bacteroidales	f__Rikenellaceae	g__Alistipes	s__Alistipes sp015059845
Ce16.17	MAG596	0	0	0	280.713	355.796	88.949	<.0001	8.28023e-06	69.21	3.36	Ce	d__Bacteria	p__Firmicutes_A	c__Clostridia	Oscillospirales	f__Oscillospiraceae	g__Faecousia	s__
Ce16.18	MAG597	0	0	0	155.339	257.742	64.4356	0.0006	0.000956857	74.02	5.49	Ce	d__Bacteria	p__Firmicutes_A	c__Clostridia	Oscillospirales	f__Acutalibacteraceae	g__UMGS172	s__UMGS172 sp017416345
Ce16.20	MAG598	0	0	0	214.323	445.868	111.467	0.0002	0.000400461	68.9	1.81	Ce	d__Bacteria	p__Firmicutes_A	c__Clostridia	Christensenellales	f__CAG-314	g__Fimimonas	s__
Ce16.38	MAG599	0	0	0	189.438	571.992	142.998	0.0171	0.0210099	85.59	3.24	Ce	d__Bacteria	p__Firmicutes_A	c__Clostridia	Oscillospirales	f__CAG-272	g__RGIG2000	s__
Ce16.50	MAG600	0	0	0	184.708	680.615	170.154	0.0737	0.0837988	96.06	0.67	Ce	d__Bacteria	p__Firmicutes_A	c__Clostridia	Oscillospirales	f__Acutalibacteraceae	g__UBA6857	s__
Ce16.56	MAG601	0	0	0	95.0645	291.303	72.8256	0.0359	0.0419998	60.14	1.34	Ce	d__Bacteria	p__Firmicutes_A	c__Clostridia	Oscillospirales	f__Acutalibacteraceae	g__RGIG6098	s__
Ce16.71	MAG602	0	0	0	263.596	390.981	97.7453	<.0001	2.32495e-05	65.56	0.8	Ce	d__Bacteria	p__Spirochaetota	c__GWE2-31-10	GWE2-31-10	f__GWE2-31-10	g__RGIG8597	s__RGIG8597 sp017624275
Ce16.76	MAG603	0	0	0	638.738	380.402	95.1004	<.0001	1.08446e-06	98.58	3.29	Ce	d__Bacteria	p__Firmicutes_A	c__Clostridia	Peptostreptococcales	f__Anaerovoracaceae	g__RGIG446	s__
Ce16.84	MAG604	0	0	0	92.3015	348.992	87.2481	0.1508	0.165656	61.24	0.73	Ce	d__Bacteria	p__Firmicutes_A	c__Clostridia	Oscillospirales	f__Acutalibacteraceae	g__CAG-964	s__
Ce16.86	MAG605	0	0	0	506.103	725.512	181.378	<.0001	8.28023e-06	83.6	4.63	Ce	d__Bacteria	p__Firmicutes_A	c__Clostridia	Oscillospirales	f__Acutalibacteraceae	g__Fimenecus	s__Fimenecus sp017399175
Ce16.93	MAG606	0	0	0	163.656	312.492	78.1229	0.0015	0.00216609	55.56	0.47	Ce	d__Bacteria	p__Firmicutes_A	c__Clostridia	Oscillospirales	f__Acutalibacteraceae	g__CAG-177	s__CAG-177 sp017473165
Ce16.96	MAG607	0	0	0	343.42	736.058	184.014	0.0035	0.00478424	74.12	7.96	Ce	d__Bacteria	p__Verrucomicrobiota	c__Verrucomicrobiae	Opitutales	f__UBA953	g__Spyradosoma	s__Spyradosoma sp015061905
Ce16.102	MAG608	0	0	0	810.981	1227.65	306.912	<.0001	6.30507e-05	94.92	0.48	Ce	d__Bacteria	p__Bacteroidota	c__Bacteroidia	Bacteroidales	f__UBA932	g__Egerieousia	s__Egerieousia sp017625535
Ce16.119	MAG609	0	0	0	447.715	1086.22	271.556	0.0079	0.0101688	95.6	1.16	Ce	d__Bacteria	p__Proteobacteria	c__Alphaproteobacteria	RF32	f__UBA3637	g__	s__
Ce16.126	MAG610	0	0	0	159.327	352.522	88.1304	0.0002	0.000400461	53.71	1.83	Ce	d__Bacteria	p__Firmicutes_A	c__Clostridia	Christensenellales	f__Borkfalkiaceae	g__UBA1259	s__
Ce16.154	MAG611	0	0	0	440.613	535.133	133.783	<.0001	6.30507e-05	82.5	0.83	Ce	d__Bacteria	p__Actinobacteriota	c__Actinomycetia	Actinomycetales	f__Bifidobacteriaceae	g__RGIG1476	s__RGIG1476 sp017413255
Ce16.228	MAG612	0	0	0	902.724	2943.95	735.988	0.0015	0.00216609	96.85	1.33	Ce	d__Bacteria	p__Firmicutes	c__Bacilli	ML615J-28	f__CAG-698	g__CAG-698	s__
Ce16.243	MAG613	0	0	0	715.717	2633.27	658.317	0.0079	0.0101688	51.28	0.72	Ce	d__Bacteria	p__Firmicutes_A	c__Clostridia	Christensenellales	f__UBA1242	g__RGIG1681	s__
Ce16.289	MAG614	0	0	0	3393	6504.26	1626.06	<.0001	1.08446e-06	92.86	4.74	Ce	d__Bacteria	p__Firmicutes_A	c__Clostridia	Oscillospirales	f__Oscillospiraceae	g__Faecousia	s__
Ce16.372	MAG615	0	0	0	630.328	1472.96	368.239	<.0001	6.30507e-05	95.67	1.32	Ce	d__Bacteria	p__Bacteroidota	c__Bacteroidia	Bacteroidales	f__Rikenellaceae	g__Alistipes	s__Alistipes sp017465055
Ce16.394	MAG616	0	0	0	725.001	1767.45	441.863	<.0001	6.30507e-05	98.6	0.7	Ce	d__Bacteria	p__Spirochaetota	c__Spirochaetia	Treponematales	f__Treponemataceae	g__Treponema_F	s__Treponema_F sp017622135
Ce16.458	MAG617	0	0	0	910.796	2608.33	652.083	0.0171	0.0210099	88.61	5	Ce	d__Bacteria	p__Firmicutes_A	c__Clostridia	Oscillospirales	f__Acutalibacteraceae	g__RUG806	s__RUG806 sp015066205
Ce16.460	MAG618	0	0	0	530.143	1761.55	440.388	0.0171	0.0210099	93.86	1.26	Ce	d__Bacteria	p__Bacteroidota	c__Bacteroidia	Bacteroidales	f__Bacteroidaceae	g__HGM04593	s__HGM04593 sp017503645
Ce16.463	MAG619	0	0	0	339.39	442.901	110.725	0.0002	0.000400461	87.66	6.65	Ce	d__Bacteria	p__Bacteroidota	c__Bacteroidia	Bacteroidales	f__Barnesiellaceae	g__Barnesiella_A	s__Barnesiella_A sp017410245
Ce16.464	MAG620	0	0	0	619.846	1963.24	490.81	0.0171	0.0210099	93.86	0.37	Ce	d__Bacteria	p__Bacteroidota	c__Bacteroidia	Bacteroidales	f__Bacteroidaceae	g__HGM04593	s__
Ce16.465	MAG621	0	0	0	731.93	2099.72	524.93	0.0737	0.0837988	93.2	0	Ce	d__Bacteria	p__Verrucomicrobiota	c__Verrucomicrobiae	Verrucomicrobiales	f__Akkermansiaceae	g__Akkermansia	s__
Ce16.466	MAG622	0	0	0	418.205	996.156	249.039	0.0002	0.000400461	91.23	0.97	Ce	d__Bacteria	p__Bacteroidota	c__Bacteroidia	Bacteroidales	f__Barnesiellaceae	g__Barnesiella_A	s__Barnesiella_A sp017935645
Ce16.468	MAG623	0	0	0	1586.91	1344.26	336.064	<.0001	1.08446e-06	80.92	1.34	Ce	d__Bacteria	p__Firmicutes_A	c__Clostridia	Oscillospirales	f__Oscillospiraceae	g__Faecousia	s__
Ce16.471	MAG624	0	0	0	4518.78	3971.39	992.848	<.0001	1.08446e-06	61.53	4.03	Ce	d__Bacteria	p__Bacteroidota	c__Bacteroidia	Bacteroidales	f__Bacteroidaceae	g__Phocaeicola	s__
Ce16.475	MAG625	0	0	0	1652.85	692.339	173.085	<.0001	1.08446e-06	85.39	3.3	Ce	d__Bacteria	p__Firmicutes_A	c__Clostridia	Oscillospirales	f__Oscillospiraceae	g__Dysosmobacter	s__
Ce16.476	MAG626	0	0	0	311.841	685.078	171.269	0.0006	0.000956857	94.63	0.89	Ce	d__Bacteria	p__Firmicutes_A	c__Clostridia	Oscillospirales	f__Acutalibacteraceae	g__Ruminococcus_E	s__Ruminococcus_E sp017456845
Ce16.480	MAG627	0	0	0	897.354	1529.44	382.361	0.0015	0.00216609	69.95	0.48	Ce	d__Bacteria	p__Bacteroidota	c__Bacteroidia	Bacteroidales	f__Rikenellaceae	g__Alistipes	s__Alistipes sp015060165
Ce16.482	MAG628	0	0	0	855.011	1882.58	470.645	0.0015	0.00216609	97.99	2.01	Ce	d__Bacteria	p__Firmicutes_A	c__Clostridia	Oscillospirales	f__JAAYXM01	g__RGIG7332	s__
Ce16.484	MAG629	0	0	0	710.032	957.507	239.377	0.0002	0.000400461	95.75	0	Ce	d__Bacteria	p__Firmicutes_A	c__Clostridia	Oscillospirales	f__Acutalibacteraceae	g__SIG565	s__SIG565 sp015066295
Ce16.485	MAG630	0	0	0	1099.15	2409.88	602.471	0.0079	0.0101688	93.12	0.67	Ce	d__Bacteria	p__Firmicutes_A	c__Clostridia	Oscillospirales	f__JAAYXM01	g__SIG480	s__
Ce16.489	MAG631	0	0	0	1371.07	1167.42	291.856	<.0001	1.08446e-06	58.09	9.55	Ce	d__Bacteria	p__Firmicutes_C	c__Negativicutes	Acidaminococcales	f__Acidaminococcaceae	g__Phascolarctobacterium_A	s__Phascolarctobacterium_A sp017623055
Ce16.497	MAG632	0	0	0	212.642	762.126	190.531	0.0737	0.0837988	83.18	1.69	Ce	d__Bacteria	p__Firmicutes_A	c__Clostridia	Christensenellales	f__UBA1242	g__Caccovivens	s__Caccovivens sp015069395
Ce16.501	MAG633	0	0	0	479.318	843.914	210.978	<.0001	0.000161125	82.34	7.79	Ce	d__Bacteria	p__Cyanobacteria	c__Vampirovibrionia	Gastranaerophilales	f__RUG14156	g__RGIG1918	s__
Ce16.502	MAG634	0	0	0	614.254	1175.46	293.866	<.0001	6.30507e-05	93.06	1.68	Ce	d__Bacteria	p__Firmicutes_A	c__Clostridia	RGIG6154	f__RGIG6154	g__RGIG8700	s__RGIG8700 sp017622395
Ce16.507	MAG635	0	0	0	824.286	1944.7	486.175	<.0001	2.32495e-05	94.43	0.49	Ce	d__Bacteria	p__Bacteroidota	c__Bacteroidia	Bacteroidales	f__UBA932	g__Egerieousia	s__Egerieousia sp015060445
Ce16.508	MAG636	0	0	0	598.39	1503.4	375.85	0.0171	0.0210099	69.64	1.34	Ce	d__Bacteria	p__Firmicutes_A	c__Clostridia	Oscillospirales	f__Acutalibacteraceae	g__RUG806	s__
Ce16.511	MAG637	0	0	0	1146.88	2471.53	617.883	<.0001	2.90589e-06	92.7	4.49	Ce	d__Bacteria	p__Firmicutes	c__Bacilli	RF39	f__UBA660	g__CAG-302	s__
Ce16.512	MAG638	0	0	0	851.287	2273.11	568.277	<.0001	0.000161125	87.87	4.73	Ce	d__Bacteria	p__Cyanobacteria	c__Vampirovibrionia	Gastranaerophilales	f__Gastranaerophilaceae	g__Avigastranaerophilus	s__
Ce16.516	MAG639	0	0	0	596.391	610.914	152.729	<.0001	8.28023e-06	57.21	3.45	Ce	d__Bacteria	p__Bacteroidota	c__Bacteroidia	Bacteroidales	f__Bacteroidaceae	g__Phocaeicola_A	s__Phocaeicola_A sp017416805
Ce16.517	MAG640	0	0	0	706.828	302.756	75.689	<.0001	1.08446e-06	63.95	3.45	Ce	d__Bacteria	p__Firmicutes_B	c__Peptococcia	Peptococcales	f__Peptococcaceae	g__UBA7185	s__UBA7185 sp017622155
Ce16.518	MAG641	0	0	0	567.618	2124.38	531.096	0.0359	0.0419998	91.28	0.67	Ce	d__Bacteria	p__Firmicutes_A	c__Clostridia	UMGS1810	f__UMGS1810	g__SIG435	s__
Ce16.520	MAG642	0	0	0	477.528	998.675	249.669	0.0002	0.000400461	79.68	2.34	Ce	d__Bacteria	p__Desulfobacterota_I	c__Desulfovibrionia	Desulfovibrionales	f__Desulfovibrionaceae	g__Mailhella	s__
Ce16.521	MAG643	98.9815	111.515	27.8787	105.041	313.509	78.3774	0.0594	0.0690567	60.17	3.13	R	d__Bacteria	p__Firmicutes_A	c__Clostridia	Oscillospirales	f__Ruminococcaceae	g__Ruminococcus	s__
Ce16.522	MAG644	0	0	0	735.76	673.079	168.27	<.0001	1.08446e-06	57.05	0	Ce	d__Bacteria	p__Firmicutes_A	c__Clostridia	Oscillospirales	f__Oscillospiraceae	g__Faecousia	s__
Ce16.525	MAG645	0	0	0	431.476	292.634	73.1584	<.0001	1.08446e-06	96.1	0.71	Ce	d__Bacteria	p__Firmicutes_A	c__Clostridia	Peptostreptococcales	f__Anaerovoracaceae	g__CAG-238	s__CAG-238 sp017436705
Ce16.527	MAG646	0	0	0	746.916	993.019	248.255	<.0001	8.28023e-06	89.73	2.2	Ce	d__Bacteria	p__Firmicutes_A	c__Clostridia	Lachnospirales	f__Lachnospiraceae	g__RGIG6307	s__
Ce16.537	MAG647	0	0	0	1609.17	2918.32	729.579	<.0001	1.08446e-06	67.39	2.01	Ce	d__Bacteria	p__Firmicutes_A	c__Clostridia	Oscillospirales	f__Oscillospiraceae	g__Faecousia	s__
Ce16.543	MAG648	0	0	0	248.943	654.738	163.685	0.0035	0.00478424	95.97	0.06	Ce	d__Bacteria	p__Firmicutes_A	c__Clostridia	Oscillospirales	f__Acutalibacteraceae	g__UMGS1484	s__UMGS1484 sp017439545
Ce23.4	MAG649	0	0	0	331.592	665.914	166.479	<.0001	2.32495e-05	94.92	0.04	Ce	d__Bacteria	p__Firmicutes_A	c__Clostridia	Oscillospirales	f__CAG-272	g__UMGS1696	s__
Ce23.7	MAG650	0	0	0	203.524	414.758	103.689	0.0171	0.0210099	76.76	2.42	Ce	d__Bacteria	p__Bacteroidota	c__Bacteroidia	Bacteroidales	f__Rikenellaceae	g__Alistipes	s__Alistipes sp017410165
Ce23.17	MAG651	0	0	0	691.496	1585.9	396.474	<.0001	6.30507e-05	93.96	0	Ce	d__Bacteria	p__Firmicutes_A	c__Clostridia	Oscillospirales	f__Ruminococcaceae	g__Faeciplasma	s__
Ce23.18	MAG652	0	0	0	207.836	168.459	42.1146	<.0001	8.28023e-06	84.48	5.03	Ce	d__Bacteria	p__Firmicutes_A	c__Clostridia	Christensenellales	f__CAG-74	g__RUG563	s__RUG563 sp015056015
Ce23.21	MAG653	0	0	0	155.579	257.376	64.3439	0.0006	0.000956857	76.38	4.8	Ce	d__Bacteria	p__Firmicutes_A	c__Clostridia	Christensenellales	f__Borkfalkiaceae	g__HGM11416	s__HGM11416 sp015055965
Ce23.23	MAG654	0	0	0	260.713	231.315	57.8288	<.0001	2.90589e-06	87.25	2.52	Ce	d__Bacteria	p__Firmicutes_A	c__Clostridia	Oscillospirales	f__Butyricicoccaceae	g__SIG471	s__SIG471 sp017441945
Ce23.24	MAG655	0	0	0	348.332	363.836	90.959	<.0001	8.28023e-06	68.01	6.38	Ce	d__Bacteria	p__Firmicutes_A	c__Clostridia	Oscillospirales	f__Acutalibacteraceae	g__UBA737	s__
Ce23.41	MAG656	0	0	0	316.61	262.779	65.6948	<.0001	2.90589e-06	74.94	4.03	Ce	d__Bacteria	p__Firmicutes_A	c__Clostridia	Oscillospirales	f__UBA644	g__HGM12619	s__HGM12619 sp015067385
Ce23.42	MAG657	0	0	0	634.53	380.45	95.1125	<.0001	1.08446e-06	98.05	7.8	Ce	d__Bacteria	p__Firmicutes_A	c__Clostridia	Peptostreptococcales	f__Anaerovoracaceae	g__RGIG446	s__
Ce23.43	MAG658	0	0	0	252.429	420.023	105.006	<.0001	0.000161125	95.2	4.8	Ce	d__Bacteria	p__Spirochaetota	c__GWE2-31-10	GWE2-31-10	f__GWE2-31-10	g__RGIG8597	s__RGIG8597 sp017624275
Ce23.46	MAG659	87.337	79.4741	19.8685	179.886	197.124	49.2809	0.161	0.176663	71.99	7.91	Ce	d__Bacteria	p__Firmicutes_A	c__Clostridia	Oscillospirales	f__Acutalibacteraceae	g__RUG420	s__RUG420 sp900317085
Ce23.58	MAG660	0	0	0	1699.81	2333.71	583.428	<.0001	8.28023e-06	97.09	1.34	Ce	d__Bacteria	p__Firmicutes_A	c__Clostridia	Oscillospirales	f__CAG-382	g__UMGS882	s__
Ce23.59	MAG661	0	0	0	1187.34	2729.81	682.451	<.0001	1.08446e-06	91.81	3.14	Ce	d__Bacteria	p__Firmicutes_A	c__Clostridia	Oscillospirales	f__Oscillospiraceae	g__Faecousia	s__
Ce23.72	MAG662	191.301	155.37	38.8424	157.569	218.177	54.5443	0.2888	0.311814	62.61	2.01	R	d__Bacteria	p__Firmicutes_A	c__Clostridia	Oscillospirales	f__Acutalibacteraceae	g__Ruminococcus_E	s__Ruminococcus_E sp900319655
Ce23.74	MAG663	0	0	0	509.729	593.188	148.297	<.0001	2.90589e-06	85.69	5.89	Ce	d__Bacteria	p__Firmicutes_A	c__Clostridia	Oscillospirales	f__Ruminococcaceae	g__UMGS1668	s__UMGS1668 sp015067125
Ce23.85	MAG664	0	0	0	421.608	196.823	49.2056	<.0001	1.08446e-06	66.27	9.09	Ce	d__Bacteria	p__Firmicutes_A	c__Clostridia	Oscillospirales	f__Butyricicoccaceae	g__RGIG1902	s__RGIG1902 sp017407765
Ce23.86	MAG665	80.3236	131.206	32.8016	243.004	520.457	130.114	0.0861	0.0974678	92.17	2.16	Ce	d__Bacteria	p__Firmicutes_A	c__Clostridia	Oscillospirales	f__Acutalibacteraceae	g__RUG714	s__
Ce23.92	MAG666	0	0	0	132.14	95.0427	23.7607	<.0001	2.90589e-06	72.03	4.46	Ce	d__Bacteria	p__Firmicutes	c__Bacilli	Erysipelotrichales	f__Erysipelotrichaceae	g__SIG230	s__SIG230 sp015058845
Ce23.97	MAG667	0	0	0	311.38	480.437	120.109	0.0079	0.0101688	92.28	2.69	Ce	d__Bacteria	p__Bacteroidota	c__Bacteroidia	Bacteroidales	f__Marinifilaceae	g__RGIG9079	s__RGIG9079 sp015061245
Ce23.101	MAG668	0	0	0	890.337	2109.08	527.269	<.0001	6.30507e-05	96.42	3.36	Ce	d__Bacteria	p__Firmicutes_A	c__Clostridia	Oscillospirales	f__Acutalibacteraceae	g__RUG806	s__RUG806 sp017396895
Ce23.112	MAG669	0	0	0	314.825	187.716	46.9291	<.0001	1.08446e-06	83.07	6.62	Ce	d__Bacteria	p__Firmicutes_A	c__Clostridia	Peptostreptococcales	f__Anaerovoracaceae	g__RGIG7179	s__
Ce23.131	MAG670	0	0	0	453.22	356.201	89.0503	<.0001	1.08446e-06	51.44	1.19	Ce	d__Bacteria	p__Bacteroidota	c__Bacteroidia	Bacteroidales	f__UBA932	g__Egerieousia	s__Egerieousia sp017935505
Ce23.137	MAG671	0	0	0	188.785	370.404	92.601	0.0171	0.0210099	87.1	3.29	Ce	d__Bacteria	p__Bacteroidota	c__Bacteroidia	Bacteroidales	f__Rikenellaceae	g__Alistipes	s__
Ce23.152	MAG672	0	0	0	3551.57	3827.18	956.794	<.0001	1.08446e-06	68.55	9.04	Ce	d__Bacteria	p__Firmicutes_A	c__Clostridia	Oscillospirales	f__Oscillospiraceae	g__Faecousia	s__
Ce23.154	MAG673	0	0	0	328.766	567.846	141.961	<.0001	2.32495e-05	95.97	0	Ce	d__Bacteria	p__Firmicutes_A	c__Clostridia	Oscillospirales	f__SIG530	g__SIG530	s__SIG530 sp015067075
Ce23.173	MAG674	0	0	0	1842.1	3873.1	968.275	<.0001	1.08446e-06	75.83	7.95	Ce	d__Bacteria	p__Firmicutes_A	c__Clostridia	Lachnospirales	f__Lachnospiraceae	g__RGIG6307	s__
Ce23.184	MAG675	0	0	0	3859.6	1657.34	414.335	<.0001	1.08446e-06	58.57	3.32	Ce	d__Bacteria	p__Bacteroidota	c__Bacteroidia	Bacteroidales	f__UBA932	g__Cryptobacteroides	s__
Ce23.189	MAG676	41.087	133.332	33.333	133.33	348.936	87.234	0.89	0.905721	96.96	2.54	Ce	d__Bacteria	p__Firmicutes_A	c__Clostridia	Oscillospirales	f__Acutalibacteraceae	g__Ruminococcus_E	s__
Ce23.194	MAG677	196.216	273.734	68.4335	141.092	339.165	84.7913	0.3396	0.359787	80.13	2.25	R	d__Bacteria	p__Patescibacteria	c__Saccharimonadia	Saccharimonadales	f__Nanosyncoccaceae	g__Nanosyncoccus	s__
Ce23.255	MAG678	0	0	0	487.943	230.457	57.6143	<.0001	1.08446e-06	58.93	5.17	Ce	d__Bacteria	p__Firmicutes_A	c__Clostridia	Oscillospirales	f__CAG-272	g__UMGS1696	s__
Ce23.287	MAG679	247.142	124.323	31.0807	1743.36	2233.48	558.369	<.0001	2.72947e-05	71.22	2.28	Ce	d__Bacteria	p__Firmicutes_A	c__Clostridia	TANB77	f__CAG-508	g__UMGS1663	s__
Ce23.323	MAG680	0	0	0	913.319	1950.13	487.534	0.0359	0.0419998	97.36	0	Ce	d__Bacteria	p__Bacteroidota	c__Bacteroidia	Bacteroidales	f__Rikenellaceae	g__Tidjanibacter	s__Tidjanibacter sp017521965
Ce23.389	MAG681	317.859	256.312	64.078	744.366	1027.74	256.936	0.1748	0.191226	74.93	5.6	Ce	d__Archaea	p__Methanobacteriota	c__Methanobacteria	Methanobacteriales	f__Methanobacteriaceae	g__Methanobrevibacter	s__Methanobrevibacter sp900314635
Ce23.392	MAG682	373.687	373.12	93.2799	686.245	711.35	177.837	0.1632	0.178955	64.8	9.01	Ce	d__Archaea	p__Methanobacteriota	c__Methanobacteria	Methanobacteriales	f__Methanobacteriaceae	g__Methanobrevibacter	s__Methanobrevibacter sp902784195
Ce23.395	MAG683	0	0	0	499.736	1110.94	277.736	<.0001	6.30507e-05	60.48	4.71	Ce	d__Bacteria	p__Firmicutes_A	c__Clostridia	Lachnospirales	f__Lachnospiraceae	g__RGIG6307	s__RGIG6307 sp017516285
Ce23.403	MAG684	0	0	0	1164.69	3799.85	949.963	0.1508	0.165656	91.28	0.67	Ce	d__Bacteria	p__Firmicutes_A	c__Clostridia	Oscillospirales	f__Acutalibacteraceae	g__UMGS1532	s__
Ce23.404	MAG685	0	0	0	2057.33	4238.9	1059.73	<.0001	2.32495e-05	98.08	1.44	Ce	d__Bacteria	p__Bacteroidota	c__Bacteroidia	Bacteroidales	f__Rikenellaceae	g__Alistipes	s__Alistipes sp017442365
Ce23.418	MAG686	0	0	0	602.683	772.467	193.117	<.0001	1.08446e-06	96.45	1.06	Ce	d__Bacteria	p__Firmicutes_A	c__Clostridia	Peptostreptococcales	f__Anaerovoracaceae	g__Copromorpha	s__
Ce23.420	MAG687	0	0	0	127.87	238.399	59.5996	0.0002	0.000400461	77.36	3.03	Ce	d__Bacteria	p__Firmicutes_A	c__Clostridia	Christensenellales	f__CAG-138	g__	s__
Ce23.425	MAG688	0	0	0	1176.6	700.248	175.062	<.0001	1.08446e-06	52.04	3.45	Ce	d__Bacteria	p__Firmicutes_A	c__Clostridia	Oscillospirales	f__Oscillospiraceae	g__Faecousia	s__
Ce23.426	MAG689	0	0	0	128.889	224.644	56.1609	0.0035	0.00478424	62.6	4.49	Ce	d__Bacteria	p__Firmicutes_A	c__Clostridia	Oscillospirales	f__Acutalibacteraceae	g__DTU089	s__DTU089 sp015066465
Ce23.428	MAG690	0	0	0	220.502	154.334	38.5835	<.0001	1.08446e-06	85.19	2.78	Ce	d__Bacteria	p__Firmicutes_A	c__Clostridia	Peptostreptococcales	f__Anaerovoracaceae	g__QAKD01	s__QAKD01 sp015058155
Ce23.429	MAG691	0	0	0	107.96	385.302	96.3256	0.1508	0.165656	84.34	4.22	Ce	d__Bacteria	p__Firmicutes_A	c__Clostridia	Oscillospirales	f__Acutalibacteraceae	g__UBA737	s__
Ce23.433	MAG692	0	0	0	1033.51	513.59	128.397	<.0001	1.08446e-06	62.69	4.03	Ce	d__Bacteria	p__Firmicutes_A	c__Clostridia	Lachnospirales	f__Anaerotignaceae	g__Anaerotignum	s__Anaerotignum sp017442465
Ce23.441	MAG693	0	0	0	101.529	284.522	71.1304	0.0737	0.0837988	53.25	5.48	Ce	d__Bacteria	p__Firmicutes_A	c__Clostridia	Christensenellales	f__UBA1242	g__RGIG1681	s__
Ce23.444	MAG694	0	0	0	857.84	1734.49	433.622	0.0035	0.00478424	88.33	0	Ce	d__Bacteria	p__Actinobacteriota	c__Actinomycetia	Actinomycetales	f__Bifidobacteriaceae	g__RGIG7107	s__RGIG7107 sp017538895
Ce23.465	MAG695	0	0	0	195.477	613.27	153.317	0.0002	0.000400461	95.4	2.01	Ce	d__Bacteria	p__Planctomycetota	c__Planctomycetia	Pirellulales	f__Thermoguttaceae	g__RUG369	s__
Ce23.476	MAG696	0	0	0	759.178	1073.79	268.448	<.0001	1.08446e-06	91.67	3.16	Ce	d__Bacteria	p__Firmicutes_A	c__Clostridia	Christensenellales	f__CAG-74	g__Limiplasma	s__
Ce23.478	MAG697	0	0	0	685.739	1192.62	298.154	<.0001	2.90589e-06	76.06	1.74	Ce	d__Bacteria	p__Firmicutes_A	c__Clostridia	Oscillospirales	f__CAG-272	g__CAG-390	s__CAG-390 sp017415485
Ce23.479	MAG698	0	0	0	2779.2	5338.48	1334.62	<.0001	1.08446e-06	82.42	8.56	Ce	d__Bacteria	p__Firmicutes_A	c__Clostridia	Lachnospirales	f__Lachnospiraceae	g__HGM12587	s__
Ce23.485	MAG699	0	0	0	594.34	342.367	85.5916	<.0001	1.08446e-06	68.21	8.51	Ce	d__Bacteria	p__Firmicutes_A	c__Clostridia	Lachnospirales	f__Lachnospiraceae	g__Acetatifactor	s__Acetatifactor sp015057005
Ce23.486	MAG700	0	0	0	589.987	1691.92	422.981	<.0001	0.000161125	97.99	6.82	Ce	d__Bacteria	p__Firmicutes_A	c__Clostridia	Oscillospirales	f__Acutalibacteraceae	g__Ruminococcus_E	s__
Ce23.489	MAG701	0	0	0	673.15	594.308	148.577	<.0001	1.08446e-06	94.71	1.15	Ce	d__Bacteria	p__Firmicutes_A	c__Clostridia	Lachnospirales	f__Lachnospiraceae	g__SFDP01	s__
Ce23.490	MAG702	331.151	937.66	234.415	563.38	2076.19	519.047	0.2422	0.263219	97.99	1.34	Ce	d__Bacteria	p__Firmicutes_A	c__Clostridia	Oscillospirales	f__Acutalibacteraceae	g__Ruminococcus_E	s__Ruminococcus_E sp902776975
Ce23.491	MAG703	0	0	0	2423.2	5927.68	1481.92	<.0001	1.08446e-06	61.51	9.44	Ce	d__Bacteria	p__Firmicutes_A	c__Clostridia	Oscillospirales	f__Oscillospiraceae	g__Faecousia	s__
Ce23.496	MAG704	0	0	0	401.66	817.641	204.41	0.0359	0.0419998	91.72	1.45	Ce	d__Bacteria	p__Firmicutes_A	c__Clostridia	Oscillospirales	f__CAG-272	g__Flemingibacterium	s__
Ce23.498	MAG705	0	0	0	931.565	1045.46	261.364	<.0001	1.08446e-06	83.72	4.46	Ce	d__Bacteria	p__Firmicutes_B	c__Peptococcia	Peptococcales	f__Peptococcaceae	g__UBA7185	s__UBA7185 sp017399005
Ce23.499	MAG706	0	0	0	485.39	374.234	93.5585	<.0001	2.90589e-06	81.06	9.32	Ce	d__Bacteria	p__Firmicutes_A	c__Clostridia	Lachnospirales	f__Lachnospiraceae	g__CAG-127	s__CAG-127 sp017625815
Ce23.501	MAG707	0	0	0	607.612	1460.12	365.031	0.0359	0.0419998	92.55	0.96	Ce	d__Bacteria	p__Bacteroidota	c__Bacteroidia	Bacteroidales	f__Rikenellaceae	g__Alistipes	s__Alistipes sp015060045
Ce23.502	MAG708	0	0	0	377.401	349.348	87.3369	<.0001	1.08446e-06	60.53	3.51	Ce	d__Bacteria	p__Firmicutes_A	c__Clostridia	Lachnospirales	f__Lachnospiraceae	g__CAG-510	s__
Ce23.506	MAG709	0	0	0	461.824	1302.05	325.512	0.0079	0.0101688	88.03	0	Ce	d__Bacteria	p__Firmicutes_A	c__Clostridia	Oscillospirales	f__Acutalibacteraceae	g__SFWF01	s__
Ce23.507	MAG710	0	0	0	1000.96	752.326	188.082	<.0001	1.08446e-06	90.73	3.83	Ce	d__Bacteria	p__Firmicutes_A	c__Clostridia	Lachnospirales	f__Lachnospiraceae	g__RGIG8767	s__
Ce23.512	MAG711	0	0	0	1712.6	1269.26	317.316	<.0001	1.08446e-06	80.41	2.69	Ce	d__Bacteria	p__Firmicutes_A	c__Clostridia	Lachnospirales	f__Lachnospiraceae	g__Faecalimonas	s__
Ce23.516	MAG712	0	0	0	543.123	292.07	73.0175	<.0001	1.08446e-06	91	2.13	Ce	d__Bacteria	p__Firmicutes_A	c__Clostridia	Peptostreptococcales	f__Anaerovoracaceae	g__RGIG7444	s__
Ce23.517	MAG713	0	0	0	487.627	992.56	248.14	0.0171	0.0210099	97.63	0.2	Ce	d__Bacteria	p__Firmicutes_A	c__Clostridia	UMGS1810	f__UMGS1810	g__SIG435	s__
Ce23.520	MAG714	0	0	0	446.187	356.58	89.145	<.0001	2.90589e-06	82.43	1.9	Ce	d__Bacteria	p__Firmicutes_A	c__Clostridia	Oscillospirales	f__CAG-382	g__UMGS882	s__
Ce23.525	MAG715	0	0	0	752.919	314.107	78.5266	<.0001	1.08446e-06	73.68	7.82	Ce	d__Bacteria	p__Firmicutes_B	c__Peptococcia	Peptococcales	f__Peptococcaceae	g__UBA7185	s__UBA7185 sp017622155
Ce23.527	MAG716	0	0	0	903.465	1562.46	390.615	<.0001	2.32495e-05	98.66	2.75	Ce	d__Bacteria	p__Firmicutes_A	c__Clostridia	UMGS1883	f__UMGS1883	g__UMGS1883	s__
Ce23.532	MAG717	0	0	0	327.6	569.625	142.406	<.0001	0.000161125	87.4	2.2	Ce	d__Bacteria	p__Firmicutes_A	c__Clostridia	Lachnospirales	f__Lachnospiraceae	g__RGIG6307	s__
Ce23.533	MAG718	0	0	0	324.713	336.514	84.1285	<.0001	2.90589e-06	86.99	1.23	Ce	d__Bacteria	p__Firmicutes_A	c__Clostridia	Oscillospirales	f__Ruminococcaceae	g__	s__
Ce23.534	MAG719	0	0	0	2445.5	3530.31	882.577	<.0001	1.08446e-06	93.99	6.7	Ce	d__Bacteria	p__Firmicutes_A	c__Clostridia	Lachnospirales	f__Lachnospiraceae	g__SFDP01	s__
Ce23.537	MAG720	0	0	0	913.093	1165.5	291.374	<.0001	1.08446e-06	69.63	2.92	Ce	d__Bacteria	p__Firmicutes_A	c__Clostridia	Oscillospirales	f__Oscillospiraceae	g__Limivicinus	s__
Ce23.542	MAG721	0	0	0	8344.18	15952.1	3988.03	<.0001	2.90589e-06	96.2	1.57	Ce	d__Bacteria	p__Firmicutes_A	c__Clostridia	Oscillospirales	f__Acutalibacteraceae	g__UBA1081	s__
Ce23.546	MAG722	0	0	0	385.308	1124.85	281.212	0.0171	0.0210099	88.08	1.48	Ce	d__Bacteria	p__Firmicutes_A	c__Clostridia	Oscillospirales	f__CAG-272	g__UMGS902	s__
Ce23.547	MAG723	0	0	0	188.818	310.801	77.7002	0.0015	0.00216609	85.16	5.52	Ce	d__Bacteria	p__Bacteroidota	c__Bacteroidia	Bacteroidales	f__UBA932	g__Egerieousia	s__
Ce23.548	MAG724	0	0	0	418.423	288.351	72.0876	<.0001	1.08446e-06	99.05	4.13	Ce	d__Bacteria	p__Firmicutes	c__Bacilli	Erysipelotrichales	f__Erysipelotrichaceae	g__RGIG1896	s__RGIG1896 sp017397025
Ce23.550	MAG725	111.401	82.0602	20.515	1280.28	1960.44	490.111	<.0001	7.64425e-05	94.1	2.58	Ce	d__Bacteria	p__Firmicutes	c__Bacilli	RF39	f__UBA660	g__UMGS1613	s__
Ce23.551	MAG726	5.97594	23.9038	5.97594	845.028	1608.79	402.197	<.0001	4.46999e-05	77.34	6.19	Ce	d__Bacteria	p__Firmicutes_A	c__Clostridia	TANB77	f__CAG-508	g__Scatovivens	s__
Ce23.555	MAG727	0	0	0	1352.03	1613.89	403.472	<.0001	1.08446e-06	91.62	4.94	Ce	d__Bacteria	p__Firmicutes_C	c__Negativicutes	Acidaminococcales	f__Acidaminococcaceae	g__Phascolarctobacterium_A	s__Phascolarctobacterium_A sp017623055
Ce23.559	MAG728	0	0	0	608.217	858.514	214.628	<.0001	1.08446e-06	90.09	5.19	Ce	d__Bacteria	p__Firmicutes_A	c__Clostridia	Lachnospirales	f__Lachnospiraceae	g__CAG-95	s__
Ce23.565	MAG729	0	0	0	2403.98	2558.65	639.661	<.0001	1.08446e-06	90.94	6.15	Ce	d__Bacteria	p__Firmicutes_A	c__Clostridia	Lachnospirales	f__Lachnospiraceae	g__Dorea	s__
Ce23.566	MAG730	0	0	0	344.587	449.154	112.289	<.0001	8.28023e-06	92.7	3.79	Ce	d__Bacteria	p__Firmicutes_A	c__Clostridia	Christensenellales	f__CAG-74	g__	s__
Ce23.569	MAG731	0	0	0	461.944	1077.11	269.278	0.0006	0.000956857	92.01	1.74	Ce	d__Bacteria	p__Firmicutes_A	c__Clostridia	Oscillospirales	f__Acutalibacteraceae	g__UBA737	s__
Ce23.574	MAG732	0	0	0	421.17	931.32	232.83	<.0001	2.32495e-05	70.84	1.63	Ce	d__Bacteria	p__Firmicutes_A	c__Clostridia	TANB77	f__CAG-465	g__CAG-465	s__
Ce23.577	MAG733	0	0	0	1144.72	459.527	114.882	<.0001	1.08446e-06	70.98	8.11	Ce	d__Bacteria	p__Firmicutes_A	c__Clostridia	Oscillospirales	f__Oscillospiraceae	g__Dysosmobacter	s__
Ce23.578	MAG734	0	0	0	244.455	153.475	38.3687	<.0001	1.08446e-06	92.13	2.71	Ce	d__Bacteria	p__Firmicutes_A	c__Clostridia	Oscillospirales	f__Ruminococcaceae	g__UBA3818	s__UBA3818 sp017408855
Ce23.579	MAG735	0	0	0	736.543	850.553	212.638	<.0001	2.90589e-06	83.46	1.85	Ce	d__Bacteria	p__Firmicutes_A	c__Clostridia	Oscillospirales	f__Oscillospiraceae	g__Faecousia	s__
Ce23.583	MAG736	0	0	0	694.409	636.837	159.209	<.0001	1.08446e-06	88.43	5.35	Ce	d__Bacteria	p__Firmicutes_A	c__Clostridia	Lachnospirales	f__Lachnospiraceae	g__Acetatifactor	s__
Ce23.585	MAG737	0	0	0	1174.69	1556.38	389.094	<.0001	1.08446e-06	92.43	3.19	Ce	d__Bacteria	p__Firmicutes_A	c__Clostridia	Oscillospirales	f__Ruminococcaceae	g__UMGS1668	s__UMGS1668 sp017847875
Ce23.586	MAG738	0	0	0	1493.21	1016.06	254.016	<.0001	1.08446e-06	58.03	0.86	Ce	d__Bacteria	p__Firmicutes_A	c__Clostridia	Oscillospirales	f__Oscillospiraceae	g__Faecousia	s__
Ce23.587	MAG739	0	0	0	402.194	668.31	167.077	<.0001	6.30507e-05	77.11	0	Ce	d__Bacteria	p__Firmicutes_A	c__Clostridia	UBA1381	f__UBA1381	g__HGM11525	s__
Ce24.1	MAG740	121.105	79.9044	19.9761	218.151	230.959	57.7397	0.1935	0.211105	73.62	2.06	Ce	d__Bacteria	p__Firmicutes	c__Bacilli	Erysipelotrichales	f__Erysipelotrichaceae	g__Bulleidia	s__
Ce24.30	MAG741	0	0	0	265.077	335.465	83.8662	<.0001	1.08446e-06	83.99	2.96	Ce	d__Bacteria	p__Firmicutes_A	c__Clostridia	UBA1381	f__UMGS1253	g__RGIG2041	s__RGIG2041 sp017411585
Ce24.39	MAG742	0	0	0	146.399	318.452	79.6129	0.0359	0.0419998	90.15	3.86	Ce	d__Bacteria	p__Firmicutes_A	c__Clostridia	Oscillospirales	f__Acutalibacteraceae	g__SIG598	s__
Ce24.40	MAG743	0	0	0	290.89	148.727	37.1819	<.0001	1.08446e-06	62.78	3.52	Ce	d__Bacteria	p__Firmicutes_A	c__Clostridia	Peptostreptococcales	f__Anaerovoracaceae	g__RGIG7179	s__
Ce24.41	MAG744	0	0	0	188.07	183.366	45.8414	<.0001	2.90589e-06	86.61	2.57	Ce	d__Bacteria	p__Firmicutes_A	c__Clostridia	Oscillospirales	f__Ruminococcaceae	g__UBA3818	s__UBA3818 sp017408855
Ce24.44	MAG745	0	0	0	135.572	299.538	74.8845	0.0035	0.00478424	81.55	4.07	Ce	d__Bacteria	p__Firmicutes_A	c__Clostridia	Oscillospirales	f__Acutalibacteraceae	g__UMGS1484	s__UMGS1484 sp017439545
Ce24.49	MAG746	0	0	0	385.961	507.248	126.812	0.0015	0.00216609	95.25	1.13	Ce	d__Bacteria	p__Bacteroidota	c__Bacteroidia	Bacteroidales	f__Muribaculaceae	g__RGIG4079	s__RGIG4079 sp017409345
Ce24.63	MAG747	0	0	0	170.182	249.222	62.3056	0.0079	0.0101688	66.21	2.6	Ce	d__Bacteria	p__Bacteroidota	c__Bacteroidia	Bacteroidales	f__Marinifilaceae	g__RGIG9079	s__RGIG9079 sp015061245
Ce24.64	MAG748	0	0	0	413.646	488.161	122.04	<.0001	6.30507e-05	97.2	2.08	Ce	d__Bacteria	p__Bacteroidota	c__Bacteroidia	Bacteroidales	f__Rikenellaceae	g__Alistipes	s__Alistipes sp017465055
Ce24.67	MAG749	0	0	0	1679.37	5687.1	1421.77	0.0737	0.0837988	97.28	0	Ce	d__Bacteria	p__Verrucomicrobiota	c__Verrucomicrobiae	Verrucomicrobiales	f__Akkermansiaceae	g__Akkermansia	s__
Ce24.76	MAG750	0	0	0	353.467	663.759	165.94	<.0001	0.000161125	98.08	0.03	Ce	d__Bacteria	p__Bacteroidota	c__Bacteroidia	Bacteroidales	f__Rikenellaceae	g__Alistipes	s__Alistipes sp017531305
Ce24.84	MAG751	0	0	0	210.212	355.726	88.9314	0.0006	0.000956857	95.27	2.07	Ce	d__Bacteria	p__Firmicutes_A	c__Clostridia	Oscillospirales	f__UBA644	g__	s__
Ce24.87	MAG752	0	0	0	193.916	360.175	90.0437	0.0006	0.000956857	91.76	0	Ce	d__Bacteria	p__Proteobacteria	c__Alphaproteobacteria	RF32	f__UBA3637	g__RGIG4140	s__RGIG4140 sp015062385
Ce24.99	MAG753	0	0	0	548.963	1768.09	442.023	0.0015	0.00216609	59.25	1.89	Ce	d__Bacteria	p__Bacteroidota	c__Bacteroidia	Bacteroidales	f__G3-4614	g__Caccoplasma	s__Caccoplasma sp015061035
Ce24.102	MAG754	0	0	0	1438.19	1084.66	271.165	<.0001	1.08446e-06	88.23	2.01	Ce	d__Bacteria	p__Firmicutes_A	c__Clostridia	UBA1381	f__UBA1381	g__RGIG1988	s__
Ce24.106	MAG755	0	0	0	165.6	382.46	95.6151	0.0079	0.0101688	83.47	2.35	Ce	d__Bacteria	p__Firmicutes_A	c__Clostridia	Oscillospirales	f__Acutalibacteraceae	g__	s__
Ce24.109	MAG756	91.1605	104.902	26.2255	136.618	231.306	57.8265	0.9038	0.918615	69.51	1.03	Ce	d__Bacteria	p__Firmicutes_A	c__Clostridia	Oscillospirales	f__Acutalibacteraceae	g__Ruminococcus_E	s__
Ce24.112	MAG757	0	0	0	133.262	230.542	57.6355	<.0001	0.000161125	85.72	1.15	Ce	d__Bacteria	p__Planctomycetota	c__Planctomycetia	Pirellulales	f__Thermoguttaceae	g__RGIG3701	s__RGIG3701 sp017408405
Ce24.114	MAG758	0	0	0	754.961	2722.32	680.579	0.0079	0.0101688	91.81	2.09	Ce	d__Bacteria	p__Firmicutes_A	c__Clostridia	Oscillospirales	f__Acutalibacteraceae	g__UBA737	s__
Ce24.120	MAG759	0	0	0	595.842	951.649	237.912	<.0001	2.90589e-06	94.94	3.9	Ce	d__Bacteria	p__Firmicutes_A	c__Clostridia	Christensenellales	f__CAG-74	g__SFHK01	s__
Ce24.124	MAG760	101.277	87.1067	21.7767	180.42	212.677	53.1693	0.5092	0.531464	83.44	3.11	Ce	d__Bacteria	p__Firmicutes_A	c__Clostridia	Oscillospirales	f__Acutalibacteraceae	g__RUG420	s__RUG420 sp900317085
Ce24.138	MAG761	0	0	0	217.209	301.503	75.3758	<.0001	1.08446e-06	90.45	7.21	Ce	d__Bacteria	p__Planctomycetota	c__Planctomycetia	Pirellulales	f__Thermoguttaceae	g__RGIG3701	s__RGIG3701 sp017939795
Ce24.140	MAG762	0	0	0	213.127	220.277	55.0694	<.0001	2.32495e-05	69.42	5.95	Ce	d__Bacteria	p__Proteobacteria	c__Alphaproteobacteria	Rs-D84	f__Rs-D84	g__Enterousia	s__Enterousia sp017472065
Ce24.146	MAG763	0	0	0	234.893	574.479	143.62	0.0015	0.00216609	61.08	0.67	Ce	d__Bacteria	p__Firmicutes_A	c__Clostridia	Oscillospirales	f__Acutalibacteraceae	g__UBA737	s__UBA737 sp017439585
Ce24.151	MAG764	40.2172	17.992	4.49801	191.352	195.843	48.9606	<.0001	6.20981e-06	53.38	4.9	Ce	d__Bacteria	p__Proteobacteria	c__Alphaproteobacteria	Rhizobiales	f__Xanthobacteraceae	g__Bradyrhizobium	s__
Ce24.163	MAG765	5.31863	21.2745	5.31863	794.684	848.325	212.081	<.0001	4.51769e-06	58.34	4.55	Ce	d__Bacteria	p__Firmicutes_A	c__Clostridia	TANB77	f__CAG-508	g__	s__
Ce24.165	MAG766	0	0	0	415.745	587.725	146.931	<.0001	6.30507e-05	81.67	0.83	Ce	d__Bacteria	p__Actinobacteriota	c__Actinomycetia	Actinomycetales	f__Bifidobacteriaceae	g__RGIG1476	s__RGIG1476 sp017413255
Ce24.184	MAG767	0	0	0	1535.78	5757.32	1439.33	0.0035	0.00478424	93.76	0.67	Ce	d__Bacteria	p__Firmicutes_A	c__Clostridia	Oscillospirales	f__Acutalibacteraceae	g__UBA737	s__UBA737 sp017623315
Ce24.209	MAG768	48.0384	192.154	48.0384	53.7134	214.854	53.7134	0.9642	0.9678	79.47	1.61	Ce	d__Bacteria	p__Firmicutes_A	c__Clostridia	Christensenellales	f__CAG-138	g__UBA3792	s__
Ce24.330	MAG769	0	0	0	1620.09	1981.42	495.354	<.0001	1.08446e-06	61.33	5.55	Ce	d__Bacteria	p__Firmicutes_A	c__Clostridia	Oscillospirales	f__Oscillospiraceae	g__Faecousia	s__
Ce24.407	MAG770	308.387	613.75	153.437	517.672	1495.69	373.922	0.6182	0.640751	67.28	0.62	Ce	d__Bacteria	p__Patescibacteria	c__Saccharimonadia	Saccharimonadales	f__Nanosyncoccaceae	g__UBA2834	s__UBA2834 sp017531585
Ce24.434	MAG771	85.3957	220.71	55.1775	405.082	1509.7	377.426	0.6764	0.69697	81.58	0.86	Ce	d__Bacteria	p__Patescibacteria	c__Saccharimonadia	Saccharimonadales	f__Nanosyncoccaceae	g__Nanosyncoccus	s__
Ce24.435	MAG772	0	0	0	662.877	1697.85	424.463	0.0737	0.0837988	89.8	1.7	Ce	d__Bacteria	p__Verrucomicrobiota	c__Verrucomicrobiae	Verrucomicrobiales	f__Akkermansiaceae	g__Akkermansia	s__Akkermansia sp017398355
Ce24.474	MAG773	0	0	0	2446.33	1187.46	296.866	<.0001	1.08446e-06	71.01	7.41	Ce	d__Bacteria	p__Bacteroidota	c__Bacteroidia	Bacteroidales	f__UBA932	g__Cryptobacteroides	s__
Ce24.475	MAG774	0	0	0	700.966	780.575	195.144	<.0001	2.90589e-06	88.84	0	Ce	d__Bacteria	p__Firmicutes_A	c__Clostridia	Oscillospirales	f__Ruminococcaceae	g__RGIG3102	s__
Ce24.479	MAG775	0	0	0	538.583	396.195	99.0488	<.0001	1.08446e-06	84.09	5.59	Ce	d__Bacteria	p__Firmicutes_A	c__Clostridia	Oscillospirales	f__Ruminococcaceae	g__RGIG3102	s__
Ce24.481	MAG776	0	0	0	437.723	723.417	180.854	0.0079	0.0101688	67.64	2.01	Ce	d__Bacteria	p__Firmicutes_A	c__Clostridia	Oscillospirales	f__Acutalibacteraceae	g__CAG-964	s__
Ce24.482	MAG777	0	0	0	1620.65	3168.59	792.148	<.0001	0.000161125	93.49	0.34	Ce	d__Bacteria	p__Firmicutes_A	c__Clostridia	Oscillospirales	f__Acutalibacteraceae	g__SIG565	s__SIG565 sp015066405
Ce24.485	MAG778	67.5153	206.026	51.5064	142.682	557.457	139.364	1	1	95.01	0.54	Ce	d__Bacteria	p__Proteobacteria	c__Alphaproteobacteria	RF32	f__CAG-239	g__RUG410	s__
Ce24.486	MAG779	0	0	0	1518.77	4064.23	1016.06	<.0001	8.28023e-06	98.33	2.57	Ce	d__Bacteria	p__Firmicutes_A	c__Clostridia	Oscillospirales	f__Oscillospiraceae	g__Faecousia	s__
Ce24.487	MAG780	0	0	0	807.477	2606.63	651.658	0.0006	0.000956857	98.28	8.78	Ce	d__Bacteria	p__Firmicutes_A	c__Clostridia	Oscillospirales	f__Acutalibacteraceae	g__UBA737	s__UBA737 sp017503305
Ce24.488	MAG781	191.061	306.33	76.5826	338.244	999.206	249.801	0.8736	0.890936	90.65	1.34	Ce	d__Bacteria	p__Firmicutes_A	c__Clostridia	Oscillospirales	f__Acutalibacteraceae	g__Ruminococcus_E	s__Ruminococcus_E sp900100595
Ce24.490	MAG782	0	0	0	1015.08	518.619	129.655	<.0001	1.08446e-06	60.73	9.94	Ce	d__Bacteria	p__Firmicutes_A	c__Clostridia	Lachnospirales	f__Anaerotignaceae	g__Anaerotignum	s__Anaerotignum sp017442465
Ce24.492	MAG783	4.21643	16.8657	4.21643	715.196	349.717	87.4293	<.0001	1.48978e-06	67.01	6.09	Ce	d__Bacteria	p__Firmicutes_A	c__Clostridia	Oscillospirales	f__Oscillospiraceae	g__Evtepia	s__Evtepia sp017435425
Ce24.498	MAG784	0	0	0	295.384	335.713	83.9282	<.0001	6.30507e-05	58.77	2.01	Ce	d__Bacteria	p__Firmicutes_A	c__Clostridia	Oscillospirales	f__JAAYXM01	g__RGIG7332	s__
Ce24.499	MAG785	0	0	0	502.261	251.434	62.8586	<.0001	1.08446e-06	63.79	3.59	Ce	d__Bacteria	p__Firmicutes_B	c__Dehalobacteriia	UBA4068	f__UBA4068	g__RGIG3155	s__RGIG3155 sp017440145
Ce24.500	MAG786	0	0	0	798.349	2403.6	600.899	0.0359	0.0419998	93.65	2.13	Ce	d__Bacteria	p__Firmicutes_A	c__Clostridia	Oscillospirales	f__Acutalibacteraceae	g__UBA737	s__
Ce24.501	MAG787	0	0	0	301.506	155.823	38.9557	<.0001	1.08446e-06	50.46	7.45	Ce	d__Bacteria	p__Firmicutes_A	c__Clostridia	Peptostreptococcales	f__Anaerovoracaceae	g__QAKD01	s__QAKD01 sp015058155
Ce24.504	MAG788	0	0	0	325.025	822.917	205.729	0.0079	0.0101688	80.76	0.67	Ce	d__Bacteria	p__Firmicutes_A	c__Clostridia	Oscillospirales	f__	g__	s__
Ce24.515	MAG789	0	0	0	436.418	518.81	129.702	<.0001	2.90589e-06	52.77	3.76	Ce	d__Bacteria	p__Firmicutes_A	c__Clostridia	Oscillospirales	f__Oscillospiraceae	g__RGIG3566	s__
Ce24.523	MAG790	127.799	511.195	127.799	79.8966	319.586	79.8966	0.9642	0.9678	64.01	2.78	R	d__Bacteria	p__Patescibacteria	c__Saccharimonadia	Saccharimonadales	f__Nanosyncoccaceae	g__UBA2834	s__
Ce24.525	MAG791	102.102	198.597	49.6493	181.048	543.644	135.911	0.9172	0.931069	76.2	0	Ce	d__Bacteria	p__Patescibacteria	c__Saccharimonadia	Saccharimonadales	f__Nanosyncoccaceae	g__Nanosyncoccus	s__
Ce24.528	MAG792	153.901	376.65	94.1624	374.331	1454.12	363.529	0.6392	0.659901	81.58	0.31	Ce	d__Bacteria	p__Patescibacteria	c__Saccharimonadia	Saccharimonadales	f__Nanosyncoccaceae	g__Nanosyncoccus	s__
Ce24.557	MAG793	0	0	0	967.464	1891.46	472.864	0.0079	0.0101688	88.42	0.94	Ce	d__Bacteria	p__Bacteroidota	c__Bacteroidia	Bacteroidales	f__Bacteroidaceae	g__UBA1189	s__UBA1189 sp017520935
Ce24.558	MAG794	1086.21	2362.11	590.528	398.011	488.238	122.06	0.2582	0.279919	95.3	3.57	R	d__Bacteria	p__Firmicutes_A	c__Clostridia	Christensenellales	f__CAG-74	g__UBA2862	s__UBA2862 sp900315585
Ce24.559	MAG795	0	0	0	1194.84	758.619	189.655	<.0001	1.08446e-06	87.92	3.4	Ce	d__Bacteria	p__Firmicutes_A	c__Clostridia	Oscillospirales	f__CAG-382	g__UMGS882	s__
Ce24.560	MAG796	0	0	0	1553.63	1820.95	455.238	<.0001	1.08446e-06	76.61	4.91	Ce	d__Bacteria	p__Firmicutes_A	c__Clostridia	Christensenellales	f__CAG-74	g__Limiplasma	s__
Ce24.565	MAG797	0	0	0	1283.66	3025.65	756.412	<.0001	2.90589e-06	90.91	3.5	Ce	d__Bacteria	p__Firmicutes_A	c__Clostridia	UBA1212	f__UBA1255	g__Egerieisoma	s__Egerieisoma sp017522515
Ce24.567	MAG798	0	0	0	1459.29	548.915	137.229	<.0001	2.90589e-06	89.32	7.6	Ce	d__Bacteria	p__Firmicutes_A	c__Clostridia	Oscillospirales	f__CAG-272	g__UMGS1696	s__
Ce24.570	MAG799	0	0	0	1518.1	887.632	221.908	<.0001	1.08446e-06	86.8	4.36	Ce	d__Bacteria	p__Firmicutes_A	c__Clostridia	Oscillospirales	f__Ruminococcaceae	g__RGIG3102	s__
Ce24.572	MAG800	0	0	0	466.389	1269.62	317.405	<.0001	0.000161125	97.32	1.34	Ce	d__Bacteria	p__Firmicutes_A	c__Clostridia	Oscillospirales	f__Acutalibacteraceae	g__Ruminococcus_E	s__Ruminococcus_E sp017481885
Ce24.574	MAG801	0	0	0	570.043	387.627	96.9068	<.0001	1.08446e-06	67.72	3.11	Ce	d__Bacteria	p__Firmicutes_A	c__Clostridia	Oscillospirales	f__Oscillospiraceae	g__Faecousia	s__Faecousia sp017481325
Ce24.575	MAG802	0	0	0	133.431	402.89	100.722	0.0737	0.0837988	86.52	3.69	Ce	d__Bacteria	p__Firmicutes_A	c__Clostridia	Oscillospirales	f__Oscillospiraceae	g__Faecousia	s__
Ce24.578	MAG803	381.503	426.34	106.585	871.958	1592.3	398.075	0.3365	0.356587	95.73	2.4	Ce	d__Archaea	p__Methanobacteriota	c__Methanobacteria	Methanobacteriales	f__Methanobacteriaceae	g__Methanobrevibacter	s__Methanobrevibacter sp900314635
Ce24.579	MAG804	0	0	0	1400.7	1215.76	303.94	<.0001	1.08446e-06	55.17	6.9	Ce	d__Bacteria	p__Firmicutes_A	c__Clostridia	Oscillospirales	f__Oscillospiraceae	g__Faecousia	s__
Ce24.583	MAG805	0	0	0	673.425	695.021	173.755	<.0001	1.08446e-06	76	2.88	Ce	d__Bacteria	p__Firmicutes_A	c__Clostridia	Lachnospirales	f__Lachnospiraceae	g__	s__
Ce24.585	MAG806	0	0	0	1058	834.328	208.582	<.0001	1.08446e-06	81.8	3.02	Ce	d__Bacteria	p__Firmicutes_A	c__Clostridia	Oscillospirales	f__Oscillospiraceae	g__Faecousia	s__
Ce24.586	MAG807	0	0	0	986.872	1105.6	276.399	<.0001	2.90589e-06	65.79	1.75	Ce	d__Bacteria	p__Firmicutes	c__Bacilli	RF39	f__UBA660	g__RUG705	s__
Ce24.591	MAG808	40.4586	74.443	18.6108	1855.92	3592.88	898.219	<.0001	1.81458e-05	82.32	3.82	Ce	d__Bacteria	p__Firmicutes_A	c__Clostridia	TANB77	f__CAG-508	g__Scatovivens	s__
Ce24.592	MAG809	22.3805	49.3152	12.3288	99.2641	262.676	65.669	0.89	0.905721	70	9.48	Ce	d__Bacteria	p__Patescibacteria	c__Saccharimonadia	Saccharimonadales	f__Nanosyncoccaceae	g__Nanosyncoccus	s__
Ce24.593	MAG810	726.318	1869.97	467.492	458.745	557.777	139.444	0.3642	0.3849	55.95	1.6	R	d__Archaea	p__Methanobacteriota	c__Methanobacteria	Methanobacteriales	f__Methanobacteriaceae	g__Methanobrevibacter_A	s__Methanobrevibacter_A thaueri_B
Ce24.596	MAG811	0	0	0	370.263	850.189	212.547	0.0035	0.00478424	85.98	0.67	Ce	d__Bacteria	p__Firmicutes_A	c__Clostridia	Oscillospirales	f__Acutalibacteraceae	g__UBA737	s__
Ce24.598	MAG812	0	0	0	355.976	451.44	112.86	<.0001	8.28023e-06	94.13	1.34	Ce	d__Bacteria	p__Firmicutes_A	c__Clostridia	Oscillospirales	f__QAMX01	g__RGIG1911	s__RGIG1911 sp017533425
Ce24.605	MAG813	296.286	207.375	51.8437	166.607	208.308	52.077	0.0194	0.0237878	59.43	8.91	R	d__Bacteria	p__Firmicutes_A	c__Clostridia	Christensenellales	f__CAG-74	g__RUG740	s__RUG740 sp017433675
Ce24.606	MAG814	0	0	0	904.68	768.356	192.089	<.0001	1.08446e-06	93.29	4.36	Ce	d__Bacteria	p__Firmicutes_A	c__Clostridia	UBA1381	f__UBA1381	g__UBA1738	s__
Ce24.608	MAG815	0	0	0	677.919	1412.1	353.024	<.0001	0.000161125	96.64	5.39	Ce	d__Bacteria	p__Firmicutes_A	c__Clostridia	UMGS1883	f__UMGS1540	g__	s__
Ce24.609	MAG816	105.988	88.0081	22.002	1498.38	1467.76	366.94	<.0001	3.2966e-05	80.16	3.73	Ce	d__Bacteria	p__Firmicutes_A	c__Clostridia	TANB77	f__CAG-508	g__CAG-452	s__
Ce24.613	MAG817	0	0	0	228.937	915.746	228.937	0.3173	0.337339	97.09	0.67	Ce	d__Bacteria	p__Firmicutes_A	c__Clostridia	Oscillospirales	f__Acutalibacteraceae	g__SIG565	s__
Ce24.616	MAG818	79.3511	300.286	75.0714	59.5794	238.318	59.5794	0.5511	0.573251	62.27	2.71	R	d__Bacteria	p__Firmicutes_A	c__Clostridia	Lachnospirales	f__Lachnospiraceae	g__Eubacterium_G	s__
Ce24.621	MAG819	24.1728	54.6052	13.6513	1002.95	1440.89	360.222	<.0001	2.40898e-06	52.63	7.97	Ce	d__Bacteria	p__Firmicutes	c__Bacilli	RF39	f__UBA660	g__RUG11198	s__
Ce24.625	MAG820	0	0	0	215.005	531.368	132.842	0.0015	0.00216609	56.41	0	Ce	d__Bacteria	p__Firmicutes_A	c__Clostridia	Oscillospirales	f__Ruminococcaceae	g__UMGS1668	s__
Ce24.627	MAG821	0	0	0	1109.34	1163.31	290.828	<.0001	8.28023e-06	93.06	0.51	Ce	d__Bacteria	p__Firmicutes_A	c__Clostridia	Oscillospirales	f__CAG-272	g__SIG701	s__
Ce24.629	MAG822	0	0	0	862.713	1374.38	343.595	<.0001	2.90589e-06	94.04	5.17	Ce	d__Bacteria	p__Firmicutes_A	c__Clostridia	Oscillospirales	f__Acutalibacteraceae	g__UBA737	s__
Ce24.630	MAG823	0	0	0	637.444	382.622	95.6554	<.0001	1.08446e-06	89.14	3.32	Ce	d__Bacteria	p__Firmicutes_A	c__Clostridia	Oscillospirales	f__Oscillospiraceae	g__HGM13010	s__HGM13010 sp017415945
Ce24.631	MAG824	0	0	0	758.162	1205.6	301.399	<.0001	1.08446e-06	87.55	7.38	Ce	d__Bacteria	p__Firmicutes_A	c__Clostridia	Oscillospirales	f__Ruminococcaceae	g__RGIG3102	s__RGIG3102 sp017483145
Ce24.632	MAG825	0	0	0	218.789	414.351	103.588	0.0002	0.000400461	69.22	0.81	Ce	d__Bacteria	p__Firmicutes_A	c__Clostridia	UMGS1810	f__UMGS1810	g__RGIG4708	s__
Ce24.634	MAG826	4.33228	17.3291	4.33228	807.525	800.696	200.174	<.0001	4.51769e-06	61.46	1.34	Ce	d__Bacteria	p__Firmicutes_A	c__Clostridia	TANB77	f__CAG-508	g__	s__
Ce24.635	MAG827	127.875	190.403	47.6007	254.662	635.612	158.903	0.702	0.722481	61.03	0.85	Ce	d__Bacteria	p__Patescibacteria	c__Saccharimonadia	Saccharimonadales	f__Nanosyncoccaceae	g__Nanosyncoccus	s__
Ce24.637	MAG828	0	0	0	1719.65	2837.48	709.371	<.0001	1.08446e-06	89.96	3.37	Ce	d__Bacteria	p__Firmicutes	c__Bacilli	RF39	f__UBA660	g__SIG208	s__SIG208 sp015059285
Ce24.638	MAG829	0	0	0	407.188	619.064	154.766	<.0001	8.28023e-06	70.86	3.19	Ce	d__Bacteria	p__Firmicutes_A	c__Clostridia	UMGS1840	f__HGM11507	g__SIG450	s__SIG450 sp015068665
Ce24.639	MAG830	0	0	0	367.589	308.667	77.1667	<.0001	1.08446e-06	67.12	6.01	Ce	d__Bacteria	p__Firmicutes_A	c__Clostridia	Oscillospirales	f__CAG-272	g__UMGS1696	s__
Ce24.641	MAG831	0	0	0	228.984	512.763	128.191	0.0079	0.0101688	88.76	0.34	Ce	d__Bacteria	p__Firmicutes_A	c__Clostridia	Christensenellales	f__QALW01	g__UMGS1322	s__
Ce24.642	MAG832	0	0	0	1018.27	1222.66	305.666	<.0001	1.08446e-06	61.38	0.67	Ce	d__Bacteria	p__Firmicutes_A	c__Clostridia	Oscillospirales	f__Oscillospiraceae	g__Faecousia	s__
Ce24.644	MAG833	0	0	0	405.224	569.173	142.293	0.0002	0.000400461	83.19	1.95	Ce	d__Bacteria	p__Firmicutes_A	c__Clostridia	UBA1381	f__UBA9506	g__UBA9506	s__
Ce24.651	MAG834	0	0	0	835.825	334.897	83.7241	<.0001	1.08446e-06	68.06	3.69	Ce	d__Bacteria	p__Firmicutes_A	c__Clostridia	Oscillospirales	f__Oscillospiraceae	g__Alloscillospira	s__
Ce24.655	MAG835	0	0	0	281.506	259.217	64.8042	<.0001	2.32495e-05	66.76	4.25	Ce	d__Bacteria	p__Firmicutes_A	c__Clostridia	Oscillospirales	f__CAG-272	g__Avispirillum	s__
Ce24.656	MAG836	0	0	0	795.177	275.166	68.7915	<.0001	1.08446e-06	91.03	9.04	Ce	d__Bacteria	p__Firmicutes_B	c__Peptococcia	Peptococcales	f__Peptococcaceae	g__UBA7185	s__UBA7185 sp017622155
Ce24.661	MAG837	362.322	670.938	167.734	258.078	734.908	183.727	0.3865	0.407182	93.46	0.67	R	d__Bacteria	p__Firmicutes_A	c__Clostridia	Oscillospirales	f__Acutalibacteraceae	g__Ruminococcus_E	s__
Ce24.663	MAG838	0	0	0	750.822	1701.54	425.384	0.0079	0.0101688	98.68	1.26	Ce	d__Bacteria	p__Bacteroidota	c__Bacteroidia	Bacteroidales	f__Muribaculaceae	g__CAG-485	s__CAG-485 sp015061085
Ce24.665	MAG839	0	0	0	580.536	317.745	79.4362	<.0001	1.08446e-06	75.95	4.85	Ce	d__Bacteria	p__Firmicutes_A	c__Clostridia	Oscillospirales	f__Ruminococcaceae	g__Negativibacillus	s__Negativibacillus sp017439985
Ce24.671	MAG840	0	0	0	179.59	287.547	71.8866	<.0001	2.32495e-05	90.8	5.55	Ce	d__Bacteria	p__Planctomycetota	c__Planctomycetia	Pirellulales	f__Thermoguttaceae	g__RUG369	s__RUG369 sp017466305
Ce25.7	MAG841	0	0	0	208.187	331.702	82.9255	0.0015	0.00216609	90.15	3.2	Ce	d__Bacteria	p__Firmicutes_A	c__Clostridia	Oscillospirales	f__Acutalibacteraceae	g__CAG-177	s__CAG-177 sp017403185
Ce25.9	MAG842	0	0	0	180.403	505.254	126.314	0.1508	0.165656	67.63	3.88	Ce	d__Bacteria	p__Bacteroidota	c__Bacteroidia	Bacteroidales	f__Rikenellaceae	g__Alistipes	s__Alistipes sp015060005
Ce25.25	MAG843	0	0	0	283.254	559.809	139.952	0.0002	0.000400461	90.41	3.4	Ce	d__Bacteria	p__Bacteroidota	c__Bacteroidia	Flavobacteriales	f__UBA1820	g__Merdimorpha	s__Merdimorpha sp017620815
Ce25.39	MAG844	0	0	0	682.912	559.443	139.861	<.0001	1.08446e-06	95.71	0	Ce	d__Bacteria	p__Bacteroidota	c__Bacteroidia	Bacteroidales	f__UBA932	g__Egerieousia	s__Egerieousia sp017935505
Ce25.49	MAG845	0	0	0	1190.42	574.034	143.509	<.0001	1.08446e-06	89.45	7.61	Ce	d__Bacteria	p__Firmicutes_A	c__Clostridia	Lachnospirales	f__Anaerotignaceae	g__Anaerotignum	s__Anaerotignum sp017442465
Ce25.52	MAG846	0	0	0	166.538	487.765	121.941	0.0035	0.00478424	91.88	2.4	Ce	d__Bacteria	p__Firmicutes_A	c__Clostridia	Oscillospirales	f__Ruminococcaceae	g__	s__
Ce25.54	MAG847	0	0	0	533.752	580.068	145.017	<.0001	1.08446e-06	63.34	8.75	Ce	d__Bacteria	p__Firmicutes_A	c__Clostridia	Oscillospirales	f__CAG-272	g__RGIG3925	s__
Ce25.67	MAG848	0	0	0	201.232	389.898	97.4745	0.0079	0.0101688	88.19	5.63	Ce	d__Bacteria	p__Verrucomicrobiota	c__Verrucomicrobiae	Opitutales	f__UBA953	g__Spyradosoma	s__Spyradosoma sp015061905
Ce25.68	MAG849	0	0	0	224.606	871.827	217.957	0.1508	0.165656	92.01	2.31	Ce	d__Bacteria	p__Firmicutes_A	c__Clostridia	Christensenellales	f__RUG350	g__RGIG2224	s__
Ce25.71	MAG850	0	0	0	357.843	748.165	187.041	0.0006	0.000956857	94.05	0.95	Ce	d__Bacteria	p__Bacteroidota	c__Bacteroidia	Bacteroidales	f__UBA932	g__Egerieousia	s__Egerieousia sp015060445
Ce25.87	MAG851	0	0	0	464.447	472.493	118.123	<.0001	1.08446e-06	56.07	0.86	Ce	d__Bacteria	p__Firmicutes_A	c__Clostridia	Oscillospirales	f__Acutalibacteraceae	g__CAG-557	s__
Ce25.92	MAG852	68.7975	147.119	36.7797	392.156	500.066	125.016	0.0307	0.0370888	52.64	2.57	Ce	d__Bacteria	p__Firmicutes_A	c__Clostridia	Oscillospirales	f__Acutalibacteraceae	g__Ruminococcus_E	s__
Ce25.111	MAG853	0	0	0	715.472	1373.55	343.387	<.0001	2.90589e-06	89.5	2.66	Ce	d__Bacteria	p__Firmicutes_A	c__Clostridia	Lachnospirales	f__Lachnospiraceae	g__Acetatifactor	s__
Ce25.146	MAG854	0	0	0	401.5	508.106	127.027	<.0001	8.28023e-06	72.96	8.76	Ce	d__Bacteria	p__Firmicutes_A	c__Clostridia	Oscillospirales	f__CAG-382	g__RGIG6353	s__
Ce25.147	MAG855	0	0	0	141.667	505.569	126.392	0.0737	0.0837988	51.3	7.19	Ce	d__Bacteria	p__Firmicutes_A	c__Clostridia	Christensenellales	f__UBA1242	g__UBA6345	s__UBA6345 sp017409005
Ce25.216	MAG856	0	0	0	1038.82	1754.48	438.619	0.0015	0.00216609	83.4	1.65	Ce	d__Bacteria	p__Verrucomicrobiota	c__Verrucomicrobiae	Verrucomicrobiales	f__Akkermansiaceae	g__Akkermansia	s__Akkermansia sp017409465
Ce25.238	MAG857	0	0	0	2137.41	1931.19	482.797	<.0001	1.08446e-06	51.61	4.21	Ce	d__Bacteria	p__Bacteroidota	c__Bacteroidia	Bacteroidales	f__UBA932	g__Cryptobacteroides	s__
Ce25.271	MAG858	0	0	0	2360.3	2203.68	550.919	<.0001	1.08446e-06	70.96	6.9	Ce	d__Bacteria	p__Bacteroidota	c__Bacteroidia	Bacteroidales	f__UBA932	g__Cryptobacteroides	s__
Ce25.279	MAG859	0	0	0	612.42	1244.89	311.222	<.0001	0.000161125	97.63	1.34	Ce	d__Bacteria	p__Firmicutes_A	c__Clostridia	Oscillospirales	f__Acutalibacteraceae	g__UBA6857	s__UBA6857 sp017396515
Ce25.396	MAG860	0	0	0	383.685	381.283	95.3207	<.0001	8.28023e-06	81.84	8.32	Ce	d__Bacteria	p__Firmicutes_A	c__Clostridia	Oscillospirales	f__Oscillospiraceae	g__SIG483	s__SIG483 sp015068035
Ce25.397	MAG861	0	0	0	141.633	533.171	133.293	0.1508	0.165656	89.51	3.91	Ce	d__Bacteria	p__Firmicutes_A	c__Clostridia	Oscillospirales	f__Acutalibacteraceae	g__SFWF01	s__
Ce25.398	MAG862	0	0	0	1187.78	518.967	129.742	<.0001	1.08446e-06	53.1	5.17	Ce	d__Bacteria	p__Firmicutes_A	c__Clostridia	Oscillospirales	f__Oscillospiraceae	g__Dysosmobacter	s__
Ce25.401	MAG863	0	0	0	670.293	386.889	96.7222	<.0001	1.08446e-06	70.56	5.14	Ce	d__Bacteria	p__Firmicutes_B	c__Peptococcia	Peptococcales	f__Peptococcaceae	g__UBA7185	s__UBA7185 sp017622155
Ce25.404	MAG864	0	0	0	1002.51	2730.34	682.585	<.0001	2.90589e-06	94.36	6.74	Ce	d__Bacteria	p__Firmicutes	c__Bacilli	RF39	f__UBA660	g__CAG-877	s__
Ce25.447	MAG865	0	0	0	1067.68	711.979	177.995	<.0001	1.08446e-06	75.28	9.73	Ce	d__Bacteria	p__Firmicutes_A	c__Clostridia	UBA1212	f__UBA1255	g__Egerieisoma	s__Egerieisoma sp015069165
Ce25.448	MAG866	130.109	168.681	42.1702	100.582	293.734	73.4335	0.0247	0.0300674	68.26	6.9	R	d__Bacteria	p__Firmicutes_A	c__Clostridia	Oscillospirales	f__Ruminococcaceae	g__Ruminococcus	s__
Ce25.449	MAG867	0	0	0	769.074	1130.57	282.643	<.0001	1.08446e-06	95.95	2.01	Ce	d__Bacteria	p__Firmicutes_A	c__Clostridia	Lachnospirales	f__Lachnospiraceae	g__SIG307	s__
Ce25.453	MAG868	0	0	0	490.871	687.601	171.9	<.0001	2.90589e-06	82.46	2.63	Ce	d__Bacteria	p__Firmicutes_A	c__Clostridia	Oscillospirales	f__CAG-272	g__UMGS1696	s__UMGS1696 sp015065295
Ce25.455	MAG869	0	0	0	554.42	753.182	188.296	<.0001	8.28023e-06	89.67	6.45	Ce	d__Bacteria	p__Firmicutes_A	c__Clostridia	Christensenellales	f__CAG-74	g__SFHK01	s__
Ce25.459	MAG870	0	0	0	903.631	2719.18	679.794	<.0001	8.28023e-06	91.33	2.01	Ce	d__Bacteria	p__Firmicutes_A	c__Clostridia	Oscillospirales	f__Acutalibacteraceae	g__UBA737	s__UBA737 sp017502965
Ce25.465	MAG871	0	0	0	2581.01	9607.79	2401.95	0.0002	0.000400461	98.83	0.67	Ce	d__Bacteria	p__Firmicutes_A	c__Clostridia	UMGS1810	f__UMGS1810	g__RGIG1828	s__
Ce25.467	MAG872	0	0	0	537.216	1331.11	332.777	<.0001	0.000161125	96.31	0	Ce	d__Bacteria	p__Firmicutes_A	c__Clostridia	Oscillospirales	f__Ruminococcaceae	g__Ruminococcus	s__
Ce25.470	MAG873	1305.58	4572.1	1143.03	140.316	511.085	127.771	0.0005	0.000800845	72.11	4.06	R	d__Bacteria	p__Firmicutes_A	c__Clostridia	Christensenellales	f__CAG-74	g__GCA-900199385	s__GCA-900199385 sp017447185
Ce25.471	MAG874	0	0	0	544.501	1502.1	375.524	<.0001	0.000161125	97.32	4.81	Ce	d__Bacteria	p__Firmicutes_A	c__Clostridia	Oscillospirales	f__Acutalibacteraceae	g__Ruminococcus_E	s__Ruminococcus_E sp017464765
Ce25.475	MAG875	0	0	0	1672.5	2658.75	664.688	<.0001	8.28023e-06	92.84	0.67	Ce	d__Bacteria	p__Firmicutes_A	c__Clostridia	Oscillospirales	f__CAG-272	g__SIG701	s__
Ce25.480	MAG876	0	0	0	215.863	386.514	96.6284	<.0001	6.30507e-05	82.35	0.67	Ce	d__Bacteria	p__Firmicutes_A	c__Clostridia	UMGS1883	f__UMGS1883	g__RGIG1927	s__RGIG1927 sp017440585
Ce25.486	MAG877	0	0	0	590.008	937.719	234.43	0.0002	0.000400461	83.04	0.89	Ce	d__Bacteria	p__Firmicutes_A	c__Clostridia	UBA1381	f__UBA9506	g__UBA9506	s__
Ce25.490	MAG878	0	0	0	651.684	1775.83	443.958	<.0001	6.30507e-05	98.43	1.03	Ce	d__Bacteria	p__Firmicutes_A	c__Clostridia	UMGS1810	f__UMGS1810	g__RGIG1828	s__
Ce25.491	MAG879	0	0	0	1193.22	1442.4	360.599	<.0001	1.08446e-06	61.3	5.52	Ce	d__Bacteria	p__Bacteroidota	c__Bacteroidia	Bacteroidales	f__UBA932	g__Cryptobacteroides	s__
Ce25.494	MAG880	0	0	0	411.465	470.654	117.664	<.0001	2.90589e-06	79.73	4.66	Ce	d__Bacteria	p__Firmicutes_A	c__Clostridia	Oscillospirales	f__CAG-272	g__RGIG1995	s__RGIG1995 sp017441005
Ce25.503	MAG881	0	0	0	99.9117	399.647	99.9117	0.3173	0.337339	56.77	6.03	Ce	d__Bacteria	p__Firmicutes_A	c__Clostridia	Oscillospirales	f__CAG-272	g__CAG-272	s__
Ce25.505	MAG882	0	0	0	660.881	894.795	223.699	<.0001	1.08446e-06	83.51	3.18	Ce	d__Bacteria	p__Firmicutes_A	c__Clostridia	Lachnospirales	f__Lachnospiraceae	g__RGIG423	s__RGIG423 sp017437205
Ce25.506	MAG883	0	0	0	1397.01	1915.01	478.753	<.0001	1.08446e-06	89.51	2.25	Ce	d__Bacteria	p__Firmicutes	c__Bacilli	RF39	f__UBA660	g__RGIG3091	s__
Ce25.508	MAG884	0	0	0	246.509	669.485	167.371	0.0171	0.0210099	93.15	0.4	Ce	d__Bacteria	p__Firmicutes_A	c__Clostridia	Oscillospirales	f__Ruminococcaceae	g__SIG578	s__SIG578 sp015066115
Ce25.510	MAG885	0	0	0	1019.34	1017.92	254.481	<.0001	1.08446e-06	78.16	8.11	Ce	d__Bacteria	p__Firmicutes_A	c__Clostridia	Lachnospirales	f__Lachnospiraceae	g__Roseburia	s__
Ce25.513	MAG886	0	0	0	420.157	932.454	233.114	0.0006	0.000956857	51.18	2.01	Ce	d__Bacteria	p__Firmicutes_A	c__Clostridia	Oscillospirales	f__Acutalibacteraceae	g__SFWF01	s__
Ce25.514	MAG887	944.527	1397.7	349.424	440.61	721.771	180.443	0.1166	0.131571	96.1	0.71	R	d__Bacteria	p__Firmicutes_A	c__Clostridia	Saccharofermentanales	f__Saccharofermentanaceae	g__Saccharofermentans	s__Saccharofermentans sp015069205
Ce25.519	MAG888	0	0	0	1390.6	1240.33	310.084	<.0001	1.08446e-06	66.49	3.38	Ce	d__Bacteria	p__Firmicutes_A	c__Clostridia	Lachnospirales	f__Lachnospiraceae	g__Acetatifactor	s__
Ce25.520	MAG889	0	0	0	585.271	748.903	187.226	<.0001	2.90589e-06	92.07	1.01	Ce	d__Bacteria	p__Firmicutes_A	c__Clostridia	Oscillospirales	f__Acutalibacteraceae	g__UBA737	s__
Ce25.526	MAG890	0	0	0	318.402	769.686	192.422	0.0006	0.000956857	93.62	4.01	Ce	d__Bacteria	p__Bacteroidota	c__Bacteroidia	Bacteroidales	f__Rikenellaceae	g__Alistipes	s__
Ce25.533	MAG891	0	0	0	1229.6	2276.27	569.067	0.0002	0.000400461	90.72	0.56	Ce	d__Bacteria	p__Firmicutes_A	c__Clostridia	Oscillospirales	f__Acutalibacteraceae	g__UBA8612	s__
Ce25.534	MAG892	0	0	0	131.866	396.513	99.1282	0.0079	0.0101688	86.72	2.35	Ce	d__Bacteria	p__Firmicutes_A	c__Clostridia	Oscillospirales	f__JAAYXM01	g__SIG480	s__
Ce25.536	MAG893	0	0	0	563.156	1031.38	257.844	0.0359	0.0419998	90.99	2.48	Ce	d__Bacteria	p__Firmicutes_A	c__Clostridia	Oscillospirales	f__Acutalibacteraceae	g__Ruminococcus_E	s__Ruminococcus_E sp017411835
Ce25.545	MAG894	0	0	0	1331.77	1895.07	473.769	<.0001	2.90589e-06	92.04	0.43	Ce	d__Bacteria	p__Bacteroidota	c__Bacteroidia	Bacteroidales	f__Bacteroidaceae	g__UBA1189	s__UBA1189 sp017465905
Ce25.547	MAG895	0	0	0	779.429	2043.24	510.809	0.0079	0.0101688	97.99	1.48	Ce	d__Bacteria	p__Firmicutes_A	c__Clostridia	Lachnospirales	f__Lachnospiraceae	g__RUG11200	s__
Ce25.548	MAG896	0	0	0	411.953	942.343	235.586	0.0006	0.000956857	72.66	0	Ce	d__Bacteria	p__Firmicutes_A	c__Clostridia	Oscillospirales	f__Acutalibacteraceae	g__UBA737	s__
Ce26.8	MAG897	0	0	0	311.231	374.638	93.6595	<.0001	2.32495e-05	89.53	5.22	Ce	d__Bacteria	p__Bacteroidota	c__Bacteroidia	Bacteroidales	f__Rikenellaceae	g__Alistipes	s__Alistipes sp017399485
Ce26.24	MAG898	0	0	0	76	249.461	62.3652	0.1508	0.165656	75.24	9.33	Ce	d__Bacteria	p__Firmicutes_A	c__Clostridia	Oscillospirales	f__Ruminococcaceae	g__	s__
Ce26.27	MAG899	0	0	0	255.663	455.307	113.827	<.0001	2.90589e-06	54.19	5.84	Ce	d__Bacteria	p__Firmicutes_A	c__Clostridia	Lachnospirales	f__Lachnospiraceae	g__CAG-127	s__
Ce26.28	MAG900	0	0	0	89.3092	261.538	65.3845	0.0359	0.0419998	59.4	0	Ce	d__Bacteria	p__Firmicutes_A	c__Clostridia	Oscillospirales	f__Acutalibacteraceae	g__CAG-488	s__CAG-488 sp017935265
Ce26.29	MAG901	0	0	0	710.186	1692.12	423.03	0.0015	0.00216609	98.25	4.94	Ce	d__Bacteria	p__Spirochaetota	c__Spirochaetia	Treponematales	f__Treponemataceae	g__RGIG9060	s__RGIG9060 sp017936665
Ce26.32	MAG902	79.1706	80.8024	20.2006	111.008	382.512	95.628	0.0307	0.0370888	94.86	2.29	Ce	d__Bacteria	p__Bacteroidota	c__Bacteroidia	Bacteroidales	f__UBA1715	g__UBA1715	s__UBA1715 sp017516865
Ce26.37	MAG903	0	0	0	296.426	811.426	202.856	0.1508	0.165656	88.8	2.99	Ce	d__Bacteria	p__Bacteroidota	c__Bacteroidia	Bacteroidales	f__Paludibacteraceae	g__RF16	s__RF16 sp017451525
Ce26.40	MAG904	0	0	0	2682.23	3541.18	885.295	<.0001	1.08446e-06	93.57	6.67	Ce	d__Bacteria	p__Bacteroidota	c__Bacteroidia	Bacteroidales	f__UBA932	g__Cryptobacteroides	s__
Ce26.45	MAG905	0	0	0	828.133	1427.17	356.792	<.0001	2.90589e-06	96.55	4.01	Ce	d__Bacteria	p__Desulfobacterota_I	c__Desulfovibrionia	Desulfovibrionales	f__Desulfovibrionaceae	g__Mailhella	s__Mailhella sp017411945
Ce26.46	MAG906	0	0	0	827.812	908.754	227.188	0.0002	0.000400461	71.21	3.06	Ce	d__Bacteria	p__Verrucomicrobiota	c__Verrucomicrobiae	Verrucomicrobiales	f__Akkermansiaceae	g__Akkermansia	s__Akkermansia sp017409465
Ce26.73	MAG907	0	0	0	447.195	1145.66	286.415	0.0035	0.00478424	91.5	2.52	Ce	d__Bacteria	p__Firmicutes_A	c__Clostridia	Oscillospirales	f__Acutalibacteraceae	g__UBA737	s__
Ce26.92	MAG908	0	0	0	1469.21	990.849	247.712	<.0001	2.90589e-06	57.4	7.53	Ce	d__Bacteria	p__Firmicutes_A	c__Clostridia	Christensenellales	f__CAG-138	g__SFEL01	s__
Ce26.118	MAG909	0	0	0	206.852	347.027	86.7567	<.0001	0.000161125	54	9.38	Ce	d__Bacteria	p__Bacteroidota	c__Bacteroidia	Bacteroidales	f__Barnesiellaceae	g__Barnesiella_A	s__Barnesiella_A sp017935645
Ce26.124	MAG910	0	0	0	277.076	123.311	30.8278	<.0001	1.08446e-06	74.02	5.5	Ce	d__Bacteria	p__Firmicutes_A	c__Clostridia	Peptostreptococcales	f__Anaerovoracaceae	g__CAG-238	s__CAG-238 sp017436705
Ce26.125	MAG911	0	0	0	4893.14	16325.8	4081.44	0.0002	0.000400461	93.2	1.98	Ce	d__Bacteria	p__Verrucomicrobiota	c__Verrucomicrobiae	Verrucomicrobiales	f__Akkermansiaceae	g__Akkermansia	s__Akkermansia sp015062015
Ce26.126	MAG912	0	0	0	565.575	1011.17	252.792	<.0001	6.30507e-05	95.87	5.29	Ce	d__Bacteria	p__Bacteroidota	c__Bacteroidia	Bacteroidales	f__Rikenellaceae	g__Alistipes	s__Alistipes sp017465055
Ce26.127	MAG913	8.88317	28.4794	7.11985	89.8199	314.471	78.6179	0.551	0.573251	67.88	0.47	Ce	d__Bacteria	p__Proteobacteria	c__Alphaproteobacteria	RF32	f__UBA3637	g__RGIG7089	s__
Ce26.142	MAG914	0	0	0	337.874	187.593	46.8984	<.0001	1.08446e-06	89.18	3.07	Ce	d__Bacteria	p__Firmicutes_A	c__Clostridia	Peptostreptococcales	f__Anaerovoracaceae	g__RGIG7179	s__
Ce26.155	MAG915	236.894	606.724	151.681	315.007	541.16	135.29	0.1452	0.162931	87.21	3.87	Ce	d__Bacteria	p__Firmicutes_A	c__Clostridia	Oscillospirales	f__Acutalibacteraceae	g__Ruminococcus_E	s__
Ce26.242	MAG916	0	0	0	1356.51	2154.17	538.542	<.0001	6.30507e-05	93.57	0.48	Ce	d__Bacteria	p__Bacteroidota	c__Bacteroidia	Bacteroidales	f__UBA932	g__Egerieousia	s__Egerieousia sp017625535
Ce26.359	MAG917	0	0	0	1744.06	1305.04	326.259	<.0001	1.08446e-06	79.53	4.54	Ce	d__Bacteria	p__Firmicutes_A	c__Clostridia	Oscillospirales	f__Oscillospiraceae	g__Avoscillospira	s__
Ce26.385	MAG918	0	0	0	1113.28	2394.34	598.585	<.0001	0.000161125	73.43	0.67	Ce	d__Bacteria	p__Firmicutes_A	c__Clostridia	Oscillospirales	f__Acutalibacteraceae	g__UBA737	s__
Ce26.414	MAG919	0	0	0	584.617	932.245	233.061	<.0001	8.28023e-06	93.96	2.29	Ce	d__Bacteria	p__Bacteroidota	c__Bacteroidia	Bacteroidales	f__Bacteroidaceae	g__HGM04593	s__HGM04593 sp017442185
Ce26.424	MAG920	0	0	0	1474.45	918.921	229.73	<.0001	1.08446e-06	55.8	8.62	Ce	d__Bacteria	p__Bacteroidota	c__Bacteroidia	Bacteroidales	f__UBA932	g__Cryptobacteroides	s__Cryptobacteroides sp017398335
Ce26.428	MAG921	0	0	0	284.02	753.077	188.269	0.0079	0.0101688	83.84	5.37	Ce	d__Bacteria	p__Firmicutes_A	c__Clostridia	Oscillospirales	f__Acutalibacteraceae	g__UBA737	s__UBA737 sp017481865
Ce26.447	MAG922	0	0	0	578.833	1075.72	268.93	0.0079	0.0101688	96.48	0.69	Ce	d__Bacteria	p__Firmicutes_A	c__Clostridia	Oscillospirales	f__JAAYXM01	g__SIG480	s__
Ce26.449	MAG923	0	0	0	264.754	395.527	98.8819	<.0001	6.30507e-05	82.55	0.83	Ce	d__Bacteria	p__Firmicutes_A	c__Clostridia	Oscillospirales	f__JAAYXM01	g__RGIG7332	s__
Ce26.451	MAG924	0	0	0	286.165	454.617	113.654	<.0001	0.000161125	78.33	1.34	Ce	d__Bacteria	p__Firmicutes_A	c__Clostridia	Oscillospirales	f__Ruminococcaceae	g__RGIG4131	s__RGIG4131 sp017466865
Ce26.452	MAG925	0	0	0	217.702	180.637	45.1592	<.0001	2.90589e-06	70.82	4.74	Ce	d__Bacteria	p__Firmicutes_A	c__Clostridia	Christensenellales	f__CAG-138	g__UBA1685	s__UBA1685 sp017435905
Ce26.453	MAG926	0	0	0	710.111	303.537	75.8842	<.0001	1.08446e-06	67.46	4.17	Ce	d__Bacteria	p__Firmicutes_B	c__Peptococcia	Peptococcales	f__Peptococcaceae	g__UBA7185	s__UBA7185 sp017622155
Ce26.457	MAG927	0	0	0	1154.89	626.198	156.549	<.0001	1.08446e-06	60.96	4.88	Ce	d__Bacteria	p__Firmicutes_A	c__Clostridia	Oscillospirales	f__Oscillospiraceae	g__Enterenecus	s__
Ce26.468	MAG928	0	0	0	190.402	197.464	49.3659	<.0001	6.30507e-05	75.47	5	Ce	d__Bacteria	p__Proteobacteria	c__Alphaproteobacteria	Rs-D84	f__Rs-D84	g__Enterousia	s__Enterousia sp017472065
Ce26.494	MAG929	551.773	451.36	112.84	248.153	637.23	159.307	0.0021	0.00296573	93.59	0.37	R	d__Bacteria	p__Bacteroidota	c__Bacteroidia	Bacteroidales	f__Bacteroidaceae	g__UBA4372	s__UBA4372 sp002494215
Ce26.495	MAG930	0	0	0	289.85	625.439	156.36	0.0006	0.000956857	67.84	1.73	Ce	d__Bacteria	p__Firmicutes_A	c__Clostridia	UMGS1810	f__UMGS1810	g__RGIG1828	s__
Ce26.500	MAG931	0	0	0	672.199	907.773	226.943	<.0001	2.90589e-06	86.96	2.44	Ce	d__Bacteria	p__Firmicutes_A	c__Clostridia	Lachnospirales	f__Lachnospiraceae	g__Acetatifactor	s__
Ce26.501	MAG932	0	0	0	2022.58	2766.01	691.502	0.0002	0.000400461	92.75	1.16	Ce	d__Bacteria	p__Bacteroidota	c__Bacteroidia	Bacteroidales	f__Bacteroidaceae	g__HGM04593	s__HGM04593 sp017398805
Ce26.503	MAG933	0	0	0	1196.59	1757.47	439.368	0.0002	0.000400461	88.11	3.03	Ce	d__Bacteria	p__Verrucomicrobiota	c__Verrucomicrobiae	Verrucomicrobiales	f__Akkermansiaceae	g__Akkermansia	s__Akkermansia sp015061985
Ce26.505	MAG934	0	0	0	461.918	1332.58	333.145	0.0359	0.0419998	96.64	1.12	Ce	d__Bacteria	p__Firmicutes_A	c__Clostridia	Oscillospirales	f__Acutalibacteraceae	g__CAG-488	s__
Ce26.506	MAG935	0	0	0	2806.26	8666.12	2166.53	<.0001	6.30507e-05	97.09	2.01	Ce	d__Bacteria	p__Firmicutes_A	c__Clostridia	Oscillospirales	f__Acutalibacteraceae	g__UBA1081	s__
Ce26.508	MAG936	0	0	0	227.271	627.567	156.892	0.0359	0.0419998	86.58	0.67	Ce	d__Bacteria	p__Firmicutes_A	c__Clostridia	UMGS1883	f__UMGS1540	g__SIG447	s__
Ce26.509	MAG937	0	0	0	1159.5	1949.67	487.417	<.0001	1.08446e-06	87.44	9.05	Ce	d__Bacteria	p__Firmicutes_A	c__Clostridia	Lachnospirales	f__Lachnospiraceae	g__UBA3766	s__UBA3766 sp017622505
Ce26.513	MAG938	0	0	0	284.597	496.077	124.019	<.0001	0.000161125	78.86	0.28	Ce	d__Bacteria	p__Firmicutes_A	c__Clostridia	Oscillospirales	f__Ruminococcaceae	g__Ruminiclostridium_E	s__
Ce26.516	MAG939	0	0	0	582.696	253.036	63.259	<.0001	1.08446e-06	59.92	3.47	Ce	d__Bacteria	p__Firmicutes_A	c__Clostridia	Christensenellales	f__CAG-74	g__RGIG2066	s__
Ce26.525	MAG940	0	0	0	288.281	794.894	198.723	0.1508	0.165656	94.28	2.15	Ce	d__Bacteria	p__Spirochaetota	c__Spirochaetia	Treponematales	f__Treponemataceae	g__Treponema_F	s__Treponema_F sp017622235
Ce26.527	MAG941	0	0	0	677.058	1256.75	314.188	<.0001	2.90589e-06	90.45	7.87	Ce	d__Bacteria	p__Firmicutes	c__Bacilli	RF39	f__UBA660	g__	s__
Ce26.528	MAG942	0	0	0	548.635	585.727	146.432	<.0001	1.08446e-06	79.17	3.64	Ce	d__Bacteria	p__Firmicutes_A	c__Clostridia	Lachnospirales	f__Lachnospiraceae	g__Acetatifactor	s__
Ce26.533	MAG943	0	0	0	954.18	1409.46	352.366	<.0001	1.08446e-06	98.55	5.99	Ce	d__Bacteria	p__Firmicutes_A	c__Clostridia	Lachnospirales	f__Lachnospiraceae	g__Roseburia	s__
Ce26.535	MAG944	0	0	0	1242.87	1553.16	388.291	<.0001	8.28023e-06	95.08	2.35	Ce	d__Bacteria	p__Firmicutes_A	c__Clostridia	Oscillospirales	f__CAG-272	g__SIG701	s__
Ce26.536	MAG945	0	0	0	642.824	576.145	144.036	<.0001	8.28023e-06	91.44	1.08	Ce	d__Bacteria	p__Bacteroidota	c__Bacteroidia	Bacteroidales	f__F082	g__Limimorpha	s__Limimorpha sp015061295
Ce26.537	MAG946	195.66	174.733	43.6833	651.255	607.297	151.824	0.0898	0.101619	78.16	0.4	Ce	d__Archaea	p__Methanobacteriota	c__Methanobacteria	Methanobacteriales	f__Methanobacteriaceae	g__Methanobrevibacter_A	s__Methanobrevibacter_A sp900314695
Ce26.539	MAG947	0	0	0	531.23	709.659	177.415	<.0001	8.28023e-06	94.49	2.83	Ce	d__Bacteria	p__Firmicutes_A	c__Clostridia	Christensenellales	f__CAG-74	g__RUG563	s__RUG563 sp017437265
Ce26.540	MAG948	0	0	0	312.082	331.946	82.9866	<.0001	2.32495e-05	55.86	7.9	Ce	d__Bacteria	p__Firmicutes_A	c__Clostridia	Oscillospirales	f__CAG-382	g__UMGS1387	s__
Ce26.546	MAG949	0	0	0	245.399	372.541	93.1352	<.0001	0.000161125	84.39	5.19	Ce	d__Bacteria	p__Firmicutes_A	c__Clostridia	Oscillospirales	f__Oscillospiraceae	g__	s__
Ce26.547	MAG950	0	0	0	3470.5	3359.97	839.993	<.0001	1.08446e-06	85.13	5.12	Ce	d__Bacteria	p__Bacteroidota	c__Bacteroidia	Bacteroidales	f__Bacteroidaceae	g__Phocaeicola	s__
Ce26.552	MAG951	29.5935	81.5586	20.3896	2202.43	6425.56	1606.39	0.0051	0.00680202	96.4	2.26	Ce	d__Bacteria	p__Bacteroidota	c__Bacteroidia	Bacteroidales	f__WCHB1-69	g__UBA1756	s__UBA1756 sp017506175
Ce26.555	MAG952	0	0	0	1309.7	887.749	221.937	<.0001	1.08446e-06	52.1	1.29	Ce	d__Bacteria	p__Firmicutes_A	c__Clostridia	Lachnospirales	f__Lachnospiraceae	g__Faecalimonas	s__
Ce26.558	MAG953	0	0	0	110.397	278.863	69.7159	0.0171	0.0210099	77.02	7.24	Ce	d__Bacteria	p__Firmicutes_A	c__Clostridia	Christensenellales	f__CAG-138	g__RGIG3096	s__RGIG3096 sp017407205
Ce26.559	MAG954	0	0	0	416.933	767.665	191.916	<.0001	2.90589e-06	94.03	9.21	Ce	d__Bacteria	p__Firmicutes_A	c__Clostridia	UMGS1883	f__UMGS1883	g__UMGS1883	s__UMGS1883 sp015068735
Ce26.560	MAG955	0	0	0	289.881	539.01	134.753	0.0171	0.0210099	84.21	1.01	Ce	d__Bacteria	p__Firmicutes_A	c__Clostridia	Oscillospirales	f__Acutalibacteraceae	g__CAG-964	s__
Ce26.561	MAG956	0	0	0	114.147	456.589	114.147	0.3173	0.337339	90.9	0.11	Ce	d__Bacteria	p__Firmicutes_A	c__Clostridia	Oscillospirales	f__Acutalibacteraceae	g__RUG806	s__RUG806 sp017440965
Ce26.562	MAG957	0	0	0	5195.91	6652.39	1663.1	<.0001	0.000161125	97.92	0	Ce	d__Bacteria	p__Bacteroidota	c__Bacteroidia	Bacteroidales	f__Muribaculaceae	g__RGIG4079	s__RGIG4079 sp017399915
Ce26.567	MAG958	0	0	0	2760.61	7193.26	1798.32	0.0002	0.000400461	94.18	1.01	Ce	d__Bacteria	p__Firmicutes_A	c__Clostridia	Oscillospirales	f__Acutalibacteraceae	g__UBA6857	s__
Ce26.568	MAG959	0	0	0	398.548	858.963	214.741	<.0001	1.08446e-06	97.63	1.15	Ce	d__Bacteria	p__Planctomycetota	c__Planctomycetia	Pirellulales	f__Thermoguttaceae	g__RGIG3701	s__RGIG3701 sp017939795
Ce26.570	MAG960	0	0	0	1507.42	1580.56	395.14	<.0001	1.08446e-06	59.43	3.14	Ce	d__Bacteria	p__Firmicutes_C	c__Negativicutes	Acidaminococcales	f__Acidaminococcaceae	g__Phascolarctobacterium_A	s__Phascolarctobacterium_A sp017623055
Ce26.572	MAG961	0	0	0	1224.52	748.691	187.173	<.0001	1.08446e-06	69.42	4.52	Ce	d__Bacteria	p__Firmicutes_A	c__Clostridia	Oscillospirales	f__Oscillospiraceae	g__Faecousia	s__
Ce26.574	MAG962	0	0	0	315.497	892.085	223.021	0.0015	0.00216609	72.16	0.67	Ce	d__Bacteria	p__Firmicutes_A	c__Clostridia	UBA1381	f__UBA1381	g__UBA1738	s__
Ce26.575	MAG963	0	0	0	1046.88	893.718	223.43	<.0001	1.08446e-06	72.47	8.85	Ce	d__Bacteria	p__Firmicutes_A	c__Clostridia	TANB77	f__UBA1234	g__UBA1234	s__
Ce26.578	MAG964	0	0	0	407.343	268.831	67.2079	<.0001	2.90589e-06	93.22	3.9	Ce	d__Bacteria	p__Firmicutes_A	c__Clostridia	Christensenellales	f__CAG-74	g__SFMI01	s__
Ce26.579	MAG965	0	0	0	363.031	501.919	125.48	<.0001	0.000161125	80.08	0.31	Ce	d__Bacteria	p__Bacteroidota	c__Bacteroidia	Bacteroidales	f__Bacteroidaceae	g__HGM04593	s__HGM04593 sp015060835
Ce26.581	MAG966	0	0	0	233.816	363.59	90.8976	0.0002	0.000400461	91.03	0.02	Ce	d__Bacteria	p__Firmicutes_A	c__Clostridia	Oscillospirales	f__Ruminococcaceae	g__Faeciplasma	s__
Ce26.582	MAG967	0	0	0	372.339	304.718	76.1795	<.0001	8.28023e-06	56.9	1.72	Ce	d__Bacteria	p__Bacteroidota	c__Bacteroidia	Bacteroidales	f__Bacteroidaceae	g__Phocaeicola_A	s__
Ce26.584	MAG968	67.8122	108.734	27.1836	794.903	1536.52	384.13	0.0007	0.00101444	85.11	2.25	Ce	d__Bacteria	p__Firmicutes	c__Bacilli	RF39	f__UBA660	g__UBA3631	s__
Ce26.588	MAG969	0	0	0	669.11	1000.61	250.152	0.0015	0.00216609	85.9	0	Ce	d__Bacteria	p__Verrucomicrobiota	c__Verrucomicrobiae	Verrucomicrobiales	f__Akkermansiaceae	g__Akkermansia	s__Akkermansia sp017415555
Ce26.592	MAG970	0	0	0	948.281	1891.49	472.872	<.0001	8.28023e-06	92.98	3.7	Ce	d__Bacteria	p__Firmicutes_A	c__Clostridia	TANB77	f__CAG-508	g__	s__
Ce26.596	MAG971	0	0	0	2522.53	5800.83	1450.21	<.0001	2.90589e-06	97.13	2.68	Ce	d__Bacteria	p__Firmicutes_A	c__Clostridia	UBA1381	f__UBA1381	g__Ornithomonoglobus	s__
Ce26.597	MAG972	1074.41	1912.32	478.079	250.092	371.869	92.9672	0.0133	0.0168961	99.65	0.02	R	d__Bacteria	p__Firmicutes_A	c__Clostridia	Saccharofermentanales	f__Saccharofermentanaceae	g__Saccharofermentans	s__Saccharofermentans sp015069205
Ce26.598	MAG973	0	0	0	1702.25	4031.29	1007.82	0.0002	0.000400461	96.64	0.35	Ce	d__Bacteria	p__Firmicutes_A	c__Clostridia	Oscillospirales	f__Ruminococcaceae	g__Ruminococcus	s__Ruminococcus sp015066935
Ce27.6	MAG974	0	0	0	349.582	834.944	208.736	0.0359	0.0419998	79.77	2.04	Ce	d__Bacteria	p__Bacteroidota	c__Bacteroidia	Bacteroidales	f__Muribaculaceae	g__RGIG4079	s__RGIG4079 sp017409345
Ce27.10	MAG975	0	0	0	833.504	442.627	110.657	<.0001	1.08446e-06	69.32	4.9	Ce	d__Bacteria	p__Firmicutes_B	c__Peptococcia	Peptococcales	f__Peptococcaceae	g__UBA7185	s__UBA7185 sp017622155
Ce27.21	MAG976	0	0	0	247.472	716.607	179.152	0.0015	0.00216609	79.4	0.89	Ce	d__Bacteria	p__Firmicutes_A	c__Clostridia	Oscillospirales	f__Acutalibacteraceae	g__Ruminococcus_E	s__
Ce27.22	MAG977	0	0	0	642.636	1667.36	416.84	<.0001	6.30507e-05	94.54	3.98	Ce	d__Bacteria	p__Firmicutes_A	c__Clostridia	Oscillospirales	f__Acutalibacteraceae	g__Ruminococcus_E	s__
Ce27.25	MAG978	0	0	0	1043.12	1400.84	350.211	0.0002	0.000400461	56.14	8.49	Ce	d__Bacteria	p__Verrucomicrobiota	c__Verrucomicrobiae	Verrucomicrobiales	f__Akkermansiaceae	g__Akkermansia	s__
Ce27.31	MAG979	0	0	0	1315.58	2986.91	746.728	0.0015	0.00216609	95.43	0	Ce	d__Bacteria	p__Bacteroidota	c__Bacteroidia	Bacteroidales	f__Rikenellaceae	g__Tidjanibacter	s__Tidjanibacter sp017396085
Ce27.32	MAG980	0	0	0	498.681	1346.6	336.651	0.0002	0.000400461	86.63	2.24	Ce	d__Bacteria	p__Firmicutes_A	c__Clostridia	UMGS1840	f__HGM11507	g__SIG450	s__SIG450 sp015068525
Ce27.42	MAG981	0	0	0	1279.51	1214.12	303.531	<.0001	1.08446e-06	62.39	4.11	Ce	d__Bacteria	p__Firmicutes_A	c__Clostridia	Oscillospirales	f__CAG-272	g__CAG-448	s__
Ce27.52	MAG982	0	0	0	363.872	1285.1	321.274	0.0359	0.0419998	81.17	3.02	Ce	d__Bacteria	p__Firmicutes_A	c__Clostridia	Christensenellales	f__Borkfalkiaceae	g__UBA1259	s__
Ce27.55	MAG983	0	0	0	4479.96	8120.78	2030.2	<.0001	2.90589e-06	91.44	1.79	Ce	d__Bacteria	p__Bacteroidota	c__Bacteroidia	Bacteroidales	f__UBA932	g__Cryptobacteroides	s__Cryptobacteroides sp015060395
Ce27.58	MAG984	0	0	0	3451.66	6456.69	1614.17	<.0001	2.90589e-06	97.09	3.6	Ce	d__Bacteria	p__Firmicutes_A	c__Clostridia	Oscillospirales	f__Acutalibacteraceae	g__UBA1081	s__UBA1081 sp017531385
Ce27.96	MAG985	0	0	0	3105.32	2951.35	737.837	<.0001	1.08446e-06	75.77	2.72	Ce	d__Bacteria	p__Firmicutes_A	c__Clostridia	Oscillospirales	f__Oscillospiraceae	g__Faecousia	s__
Ce27.108	MAG986	0	0	0	3805.87	5944.68	1486.17	<.0001	1.08446e-06	98.28	9.08	Ce	d__Bacteria	p__Bacteroidota	c__Bacteroidia	Bacteroidales	f__F082	g__Limimorpha	s__Limimorpha sp015061365
Ce27.113	MAG987	0	0	0	2630.61	4428.66	1107.16	<.0001	1.08446e-06	94.16	3.16	Ce	d__Bacteria	p__Bacteroidota	c__Bacteroidia	Bacteroidales	f__UBA932	g__Cryptobacteroides	s__
Ce27.143	MAG988	494.367	487.38	121.845	693.652	2226.75	556.688	0.0774	0.0877474	99.65	0	Ce	d__Bacteria	p__Firmicutes_A	c__Clostridia	Saccharofermentanales	f__Saccharofermentanaceae	g__Saccharofermentans	s__Saccharofermentans sp015069205
Ce27.150	MAG989	0	0	0	4521.76	7194.83	1798.71	0.0002	0.000400461	95.08	0	Ce	d__Bacteria	p__Firmicutes_A	c__Clostridia	Oscillospirales	f__Acutalibacteraceae	g__SIG565	s__
Ce27.157	MAG990	573.29	1706.97	426.742	1028.27	2680.97	670.243	0.0545	0.0635566	96	3.2	R	d__Archaea	p__Methanobacteriota	c__Methanobacteria	Methanobacteriales	f__Methanobacteriaceae	g__Methanobrevibacter_A	s__
Ce27.160	MAG991	30.9923	85.2748	21.3187	3883.29	9497.33	2374.33	0.0001	0.000216981	84.83	2.25	Ce	d__Bacteria	p__Firmicutes	c__Bacilli	RF39	f__UBA660	g__CAG-877	s__CAG-877 sp017416535
Ce27.162	MAG992	0	0	0	1157.02	926.933	231.733	<.0001	1.08446e-06	61.73	3.92	Ce	d__Bacteria	p__Firmicutes_C	c__Negativicutes	Acidaminococcales	f__Acidaminococcaceae	g__Phascolarctobacterium_A	s__Phascolarctobacterium_A sp017623055
Ce27.164	MAG993	0	0	0	1840.33	2849.73	712.433	<.0001	1.08446e-06	95.97	0	Ce	d__Bacteria	p__Firmicutes_A	c__Clostridia	Christensenellales	f__CAG-74	g__UBA11524	s__
Ce27.166	MAG994	0	0	0	1784.11	3370.17	842.543	<.0001	1.08446e-06	90.7	8.86	Ce	d__Bacteria	p__Firmicutes_A	c__Clostridia	Lachnospirales	f__Lachnospiraceae	g__HGM12587	s__
Ce27.167	MAG995	0	0	0	920.601	1873.41	468.352	0.0002	0.000400461	78.65	1.9	Ce	d__Bacteria	p__Firmicutes_A	c__Clostridia	Oscillospirales	f__Acutalibacteraceae	g__RUG806	s__
Ce27.168	MAG996	0	0	0	899.294	2360.14	590.035	<.0001	2.90589e-06	74.57	0.72	Ce	d__Bacteria	p__Firmicutes_A	c__Clostridia	TANB77	f__RGIG9151	g__RGIG9151	s__
Ce27.169	MAG997	0	0	0	1371.38	5203.31	1300.83	0.0359	0.0419998	92.55	0.48	Ce	d__Bacteria	p__Bacteroidota	c__Bacteroidia	Bacteroidales	f__Rikenellaceae	g__Tidjanibacter	s__Tidjanibacter sp017521965
Ce27.171	MAG998	0	0	0	1212.63	3242.77	810.691	<.0001	2.90589e-06	76.38	3.69	Ce	d__Bacteria	p__Firmicutes_A	c__Clostridia	TANB77	f__UBA1234	g__UBA1234	s__UBA1234 sp017522765
Ce28.13	MAG999	0	0	0	525.712	357.509	89.3772	<.0001	8.28023e-06	65.3	5.03	Ce	d__Bacteria	p__Bacteroidota	c__Bacteroidia	Bacteroidales	f__Rikenellaceae	g__Alistipes	s__Alistipes sp017935185
Ce28.19	MAG1000	0	0	0	740.157	2172.22	543.054	0.0006	0.000956857	94.51	0	Ce	d__Bacteria	p__Firmicutes_A	c__Clostridia	Oscillospirales	f__Acutalibacteraceae	g__UBA737	s__UBA737 sp017439585
Ce28.29	MAG1001	0	0	0	431.183	512.903	128.226	<.0001	2.32495e-05	96.75	2.01	Ce	d__Bacteria	p__Desulfobacterota_I	c__Desulfovibrionia	Desulfovibrionales	f__Desulfovibrionaceae	g__Desulfovibrio	s__Desulfovibrio sp017396005
Ce28.39	MAG1002	0	0	0	163.207	118.281	29.5703	<.0001	8.28023e-06	76.71	3.3	Ce	d__Bacteria	p__Firmicutes_A	c__Clostridia	Christensenellales	f__CAG-74	g__RUG563	s__RUG563 sp015056015
Ce28.40	MAG1003	220.385	151.077	37.7693	126.751	171.037	42.7593	0.0083	0.0106333	66.04	2.79	R	d__Bacteria	p__Firmicutes	c__Bacilli	Erysipelotrichales	f__Erysipelotrichaceae	g__UBA636	s__UBA636 sp900321955
Ce28.44	MAG1004	0	0	0	287.828	816.591	204.148	0.0737	0.0837988	65.25	1.8	Ce	d__Bacteria	p__Proteobacteria	c__Alphaproteobacteria	RF32	f__UBA3637	g__UBA7488	s__
Ce28.45	MAG1005	0	0	0	829.455	835.948	208.987	<.0001	1.08446e-06	95.99	7.23	Ce	d__Bacteria	p__Bacteroidota	c__Bacteroidia	Bacteroidales	f__Rikenellaceae	g__Alistipes	s__Alistipes sp017481925
Ce28.63	MAG1006	0	0	0	306.38	390.486	97.6214	<.0001	8.28023e-06	94.09	0.88	Ce	d__Bacteria	p__Firmicutes_A	c__Clostridia	Christensenellales	f__Borkfalkiaceae	g__Scatosoma	s__Scatosoma sp015055785
Ce28.75	MAG1007	0	0	0	662.909	1826.21	456.554	0.0002	0.000400461	93.54	1.19	Ce	d__Bacteria	p__Bacteroidota	c__Bacteroidia	Bacteroidales	f__UBA932	g__Egerieousia	s__Egerieousia sp015060445
Ce28.89	MAG1008	0	0	0	302.494	292.452	73.113	<.0001	8.28023e-06	55.76	5.43	Ce	d__Bacteria	p__Firmicutes_A	c__Clostridia	Christensenellales	f__CAG-314	g__SFEB01	s__
Ce28.98	MAG1009	0	0	0	235.72	405.4	101.35	<.0001	6.30507e-05	88.88	0.96	Ce	d__Bacteria	p__Bacteroidota	c__Bacteroidia	Bacteroidales	f__Rikenellaceae	g__Alistipes	s__Alistipes sp017531305
Ce28.102	MAG1010	0	0	0	231.662	366.861	91.7152	<.0001	0.000161125	60.97	0	Ce	d__Bacteria	p__Bacteroidota	c__Bacteroidia	Bacteroidales	f__Bacteroidaceae	g__HGM04593	s__HGM04593 sp015060835
Ce28.106	MAG1011	0	0	0	297.726	394.783	98.6957	<.0001	0.000161125	91.68	0.63	Ce	d__Bacteria	p__Bacteroidota	c__Bacteroidia	Bacteroidales	f__Barnesiellaceae	g__Barnesiella_A	s__Barnesiella_A sp017935645
Ce28.112	MAG1012	0	0	0	973.485	822.915	205.729	<.0001	1.08446e-06	51.72	6.9	Ce	d__Bacteria	p__Bacteroidota	c__Bacteroidia	Bacteroidales	f__F082	g__Limimorpha	s__Limimorpha sp015061295
Ce28.114	MAG1013	0	0	0	152.37	421.575	105.394	0.0035	0.00478424	95.97	1.73	Ce	d__Bacteria	p__Firmicutes_A	c__Clostridia	Oscillospirales	f__Acutalibacteraceae	g__UBA737	s__UBA737 sp015065645
Ce28.135	MAG1014	165.363	279.618	69.9045	536.827	979.322	244.83	0.2653	0.287331	99.14	0	R	d__Archaea	p__Methanobacteriota	c__Methanobacteria	Methanobacteriales	f__Methanobacteriaceae	g__Methanobrevibacter_A	s__Methanobrevibacter_A sp017434525
Ce28.167	MAG1015	0	0	0	347.467	402.075	100.519	<.0001	6.30507e-05	89.41	5.56	Ce	d__Archaea	p__Halobacteriota	c__Methanomicrobia	Methanomicrobiales	f__Methanocorpusculaceae	g__Methanocorpusculum	s__Methanocorpusculum sp017399555
Ce28.175	MAG1016	0	0	0	2886.55	2314.93	578.731	<.0001	1.08446e-06	88.92	7.27	Ce	d__Bacteria	p__Firmicutes_A	c__Clostridia	Oscillospirales	f__Oscillospiraceae	g__Faecousia	s__
Ce28.230	MAG1017	0	0	0	668.504	959.653	239.913	<.0001	1.08446e-06	57.89	3.51	Ce	d__Bacteria	p__Firmicutes_A	c__Clostridia	Lachnospirales	f__Lachnospiraceae	g__SIG307	s__
Ce28.301	MAG1018	0	0	0	504.589	1238.88	309.72	0.0006	0.000956857	96.88	0.48	Ce	d__Bacteria	p__Bacteroidota	c__Bacteroidia	Bacteroidales	f__Rikenellaceae	g__Tidjanibacter	s__Tidjanibacter sp017396085
Ce28.345	MAG1019	0	0	0	2821.3	9386.02	2346.51	0.0035	0.00478424	94.41	0.42	Ce	d__Bacteria	p__Firmicutes_A	c__Clostridia	Oscillospirales	f__Acutalibacteraceae	g__UBA737	s__
Ce28.354	MAG1020	2080.45	6768.81	1692.2	4029.64	12645.5	3161.39	0.059	0.0686788	80.44	1.56	Ce	d__Bacteria	p__Firmicutes_A	c__Clostridia	TANB77	f__CAG-508	g__CAG-492	s__
Ce28.363	MAG1021	0	0	0	329.366	1027.7	256.925	0.0171	0.0210099	97.99	1.72	Ce	d__Bacteria	p__Firmicutes_A	c__Clostridia	Oscillospirales	f__Acutalibacteraceae	g__Ruminococcus_E	s__
Ce28.365	MAG1022	0	0	0	2001.32	4917.11	1229.28	<.0001	6.30507e-05	97.6	0.96	Ce	d__Bacteria	p__Bacteroidota	c__Bacteroidia	Bacteroidales	f__Rikenellaceae	g__Alistipes	s__Alistipes sp017465055
Ce28.371	MAG1023	0	0	0	3402.22	3815.34	953.836	<.0001	2.32495e-05	97.12	0.48	Ce	d__Bacteria	p__Bacteroidota	c__Bacteroidia	Bacteroidales	f__Rikenellaceae	g__Alistipes	s__Alistipes sp017442365
Ce28.383	MAG1024	0	0	0	476.59	773.137	193.284	<.0001	2.90589e-06	81.59	0	Ce	d__Bacteria	p__Firmicutes_A	c__Clostridia	Christensenellales	f__CAG-138	g__UBA1685	s__UBA1685 sp017435905
Ce28.384	MAG1025	0	0	0	2435.13	3523.68	880.919	<.0001	1.08446e-06	91.94	3.69	Ce	d__Bacteria	p__Firmicutes_A	c__Clostridia	Oscillospirales	f__Oscillospiraceae	g__Faecousia	s__
Ce28.386	MAG1026	0	0	0	212.706	299.747	74.9366	0.0002	0.000400461	81.64	6.83	Ce	d__Bacteria	p__Firmicutes_A	c__Clostridia	Oscillospirales	f__CAG-382	g__UMGS1387	s__
Ce28.387	MAG1027	0	0	0	524.696	419.77	104.943	<.0001	1.08446e-06	81.41	7.16	Ce	d__Bacteria	p__Firmicutes_A	c__Clostridia	Oscillospirales	f__Ruminococcaceae	g__RGIG3102	s__RGIG3102 sp017442085
Ce28.389	MAG1028	0	0	0	2371.52	7802.91	1950.73	0.0002	0.000400461	93.1	5.49	Ce	d__Bacteria	p__Firmicutes_A	c__Clostridia	Oscillospirales	f__Acutalibacteraceae	g__SIG565	s__SIG565 sp015066405
Ce28.391	MAG1029	0	0	0	551.442	2044.25	511.063	0.0737	0.0837988	94.25	0.08	Ce	d__Bacteria	p__Firmicutes_A	c__Clostridia	Oscillospirales	f__Acutalibacteraceae	g__UBA737	s__
Ce28.392	MAG1030	0	0	0	1481.36	3839.53	959.883	0.0002	0.000400461	58.8	7.23	Ce	d__Bacteria	p__Firmicutes_A	c__Clostridia	Oscillospirales	f__Acutalibacteraceae	g__UBA6857	s__
Ce28.394	MAG1031	0	0	0	1331.04	370.023	92.5056	<.0001	1.08446e-06	60.39	7.49	Ce	d__Bacteria	p__Firmicutes_A	c__Clostridia	Oscillospirales	f__Oscillospiraceae	g__Dysosmobacter	s__
Ce28.400	MAG1032	0	0	0	8982.52	4768.77	1192.19	<.0001	1.08446e-06	55.73	3.02	Ce	d__Bacteria	p__Firmicutes_A	c__Clostridia	Oscillospirales	f__Oscillospiraceae	g__CAG-83	s__
Ce28.401	MAG1033	0	0	0	142.5	248.978	62.2444	0.0015	0.00216609	66.72	4.03	Ce	d__Bacteria	p__Firmicutes_A	c__Clostridia	Oscillospirales	f__Acutalibacteraceae	g__UBA737	s__UBA737 sp017442225
Ce28.411	MAG1034	0	0	0	177.712	217.626	54.4065	<.0001	6.30507e-05	54.43	1.68	Ce	d__Bacteria	p__Firmicutes_A	c__Clostridia	Monoglobales	f__Monoglobaceae	g__RGIG8709	s__RGIG8709 sp017626595
Ce28.415	MAG1035	74.0391	181.594	45.3984	75.631	250.55	62.6374	0.9211	0.933723	52.87	4.27	Ce	d__Bacteria	p__Patescibacteria	c__Saccharimonadia	Saccharimonadales	f__Nanosyncoccaceae	g__Nanosyncoccus	s__Nanosyncoccus sp017941835
Ce28.420	MAG1036	0	0	0	1876.7	2207.56	551.89	<.0001	1.08446e-06	95.63	7.18	Ce	d__Bacteria	p__Firmicutes_A	c__Clostridia	Lachnospirales	f__Lachnospiraceae	g__COE1	s__COE1 sp017436865
Ce28.434	MAG1037	0	0	0	215.111	311.211	77.8027	<.0001	8.28023e-06	92.28	9.51	Ce	d__Bacteria	p__Firmicutes_A	c__Clostridia	Oscillospirales	f__JAAYXM01	g__SIG480	s__SIG480 sp015068085
Ce28.438	MAG1038	0	0	0	220.021	642.122	160.531	0.0079	0.0101688	97.54	1.57	Ce	d__Bacteria	p__Firmicutes_A	c__Clostridia	Oscillospirales	f__Acutalibacteraceae	g__SIG598	s__
Ce28.440	MAG1039	0	0	0	827.12	1135.86	283.965	<.0001	2.90589e-06	89.91	6.96	Ce	d__Bacteria	p__Firmicutes_A	c__Clostridia	Lachnospirales	f__Lachnospiraceae	g__SZUA-448	s__
Ce28.441	MAG1040	59.9386	143.999	35.9997	1572.02	2408.51	602.127	0.0307	0.0370888	96.4	1.08	Ce	d__Bacteria	p__Bacteroidota	c__Bacteroidia	Bacteroidales	f__WCHB1-69	g__UBA1756	s__UBA1756 sp017506175
Ce28.445	MAG1041	0	0	0	334.241	436.536	109.134	<.0001	2.32495e-05	96.14	2.46	Ce	d__Bacteria	p__Firmicutes_A	c__Clostridia	RGIG6154	f__RGIG6154	g__RGIG6154	s__RGIG6154 sp017410375
Ce28.446	MAG1042	861.743	1081.52	270.38	815.392	1195.47	298.866	0.9699	0.971997	94.19	2.42	R	d__Bacteria	p__Firmicutes_A	c__Clostridia	Christensenellales	f__CAG-138	g__RUG472	s__
Ce28.447	MAG1043	0	0	0	331.199	685.219	171.305	0.0015	0.00216609	91.95	0	Ce	d__Bacteria	p__Firmicutes_A	c__Clostridia	Monoglobales	f__Monoglobaceae	g__SIG440	s__
Ce28.450	MAG1044	0	0	0	301.999	197.793	49.4482	<.0001	1.08446e-06	71.74	5.27	Ce	d__Bacteria	p__Firmicutes_A	c__Clostridia	Oscillospirales	f__Oscillospiraceae	g__RGIG1893	s__RGIG1893 sp017397075
Ce28.451	MAG1045	0	0	0	1472.47	4148.94	1037.23	<.0001	1.08446e-06	95.97	6.24	Ce	d__Bacteria	p__Firmicutes_A	c__Clostridia	Lachnospirales	f__Lachnospiraceae	g__Frisingicoccus	s__
Ce28.452	MAG1046	0	0	0	590.763	794.189	198.547	<.0001	2.90589e-06	81.97	0.4	Ce	d__Bacteria	p__Firmicutes_A	c__Clostridia	Oscillospirales	f__CAG-272	g__SIG693	s__SIG693 sp015063805
Ce28.454	MAG1047	0	0	0	240.302	254.128	63.5321	<.0001	8.28023e-06	86.56	1.79	Ce	d__Bacteria	p__Firmicutes_A	c__Clostridia	Oscillospirales	f__CAG-272	g__RGIG2161	s__RGIG2161 sp017408535
Ce28.455	MAG1048	0	0	0	318.114	157.546	39.3865	<.0001	1.08446e-06	91.08	4.61	Ce	d__Bacteria	p__Firmicutes_A	c__Clostridia	Peptostreptococcales	f__Anaerovoracaceae	g__CAG-238	s__CAG-238 sp017436705
Ce28.457	MAG1049	0	0	0	269.822	523.263	130.816	0.0171	0.0210099	94.85	0.67	Ce	d__Bacteria	p__Firmicutes_A	c__Clostridia	Oscillospirales	f__Acutalibacteraceae	g__UBA737	s__
Ce28.459	MAG1050	0	0	0	199.217	422.046	105.512	<.0001	0.000161125	88.11	1.4	Ce	d__Bacteria	p__Firmicutes_A	c__Clostridia	Christensenellales	f__CAG-138	g__UBA7707	s__
Ce28.464	MAG1051	0	0	0	141.408	451.659	112.915	0.0359	0.0419998	88.37	3.88	Ce	d__Bacteria	p__Firmicutes_A	c__Clostridia	Oscillospirales	f__Acutalibacteraceae	g__UBA737	s__
Ce28.465	MAG1052	0	0	0	533.61	407.435	101.859	<.0001	1.08446e-06	51.06	6.11	Ce	d__Bacteria	p__Bacteroidota	c__Bacteroidia	Bacteroidales	f__Tannerellaceae	g__Parabacteroides	s__Parabacteroides distasonis_B
Ce28.470	MAG1053	0	0	0	491.785	869.098	217.274	<.0001	0.000161125	91.53	0.34	Ce	d__Bacteria	p__Firmicutes_A	c__Clostridia	Oscillospirales	f__Acutalibacteraceae	g__UBA6857	s__UBA6857 sp017396515
Ce28.471	MAG1054	0	0	0	1062.94	1232.68	308.171	<.0001	1.08446e-06	85.96	4.7	Ce	d__Bacteria	p__Firmicutes_A	c__Clostridia	UMGS1883	f__UMGS1883	g__UMGS1883	s__
Ce28.472	MAG1055	0	0	0	509.73	705.364	176.341	<.0001	2.32495e-05	75.82	0.84	Ce	d__Bacteria	p__Firmicutes_A	c__Clostridia	Lachnospirales	f__Lachnospiraceae	g__Faecalimonas	s__
Ce28.475	MAG1056	0	0	0	589.403	528.529	132.132	<.0001	2.90589e-06	88.76	2.23	Ce	d__Bacteria	p__Bacteroidota	c__Bacteroidia	Bacteroidales	f__Bacteroidaceae	g__Phocaeicola_A	s__
Ce28.480	MAG1057	0	0	0	359.964	976.656	244.164	0.0079	0.0101688	96.62	4.03	Ce	d__Bacteria	p__Firmicutes_A	c__Clostridia	Oscillospirales	f__Acutalibacteraceae	g__UMGS1279	s__
Ce28.481	MAG1058	0	0	0	837.549	937.064	234.266	<.0001	1.08446e-06	62.45	1.14	Ce	d__Bacteria	p__Firmicutes_A	c__Clostridia	Lachnospirales	f__Lachnospiraceae	g__Agathobacter	s__
Ce28.484	MAG1059	0	0	0	276.486	442.499	110.625	<.0001	2.32495e-05	65.43	3.82	Ce	d__Bacteria	p__Firmicutes_A	c__Clostridia	Lachnospirales	f__Lachnospiraceae	g__Roseburia	s__
Ce28.485	MAG1060	0	0	0	214.995	404.532	101.133	0.0002	0.000400461	95.4	5.96	Ce	d__Bacteria	p__Planctomycetota	c__Planctomycetia	Pirellulales	f__Thermoguttaceae	g__RUG369	s__RUG369 sp017466305
Ce28.486	MAG1061	0	0	0	867.787	830.203	207.551	<.0001	1.08446e-06	64.85	0.57	Ce	d__Bacteria	p__Firmicutes_A	c__Clostridia	Lachnospirales	f__Lachnospiraceae	g__CAG-95	s__
Ce28.489	MAG1062	0	0	0	3403.78	3907.8	976.949	<.0001	1.08446e-06	93.47	1.43	Ce	d__Bacteria	p__Bacteroidota	c__Bacteroidia	Bacteroidales	f__UBA932	g__Cryptobacteroides	s__Cryptobacteroides sp017461285
Ce28.490	MAG1063	0	0	0	811.856	592.021	148.005	<.0001	1.08446e-06	50.16	1.72	Ce	d__Bacteria	p__Bacteroidota	c__Bacteroidia	Bacteroidales	f__Bacteroidaceae	g__Phocaeicola	s__Phocaeicola sp017503235
Ce28.491	MAG1064	0	0	0	1341.26	1160.19	290.047	<.0001	1.08446e-06	58.84	4.12	Ce	d__Bacteria	p__Firmicutes_A	c__Clostridia	Lachnospirales	f__Lachnospiraceae	g__Agathobacter	s__
Ce28.495	MAG1065	0	0	0	1633.32	1221.78	305.444	<.0001	1.08446e-06	94.03	5.01	Ce	d__Bacteria	p__Firmicutes_A	c__Clostridia	Christensenellales	f__CAG-74	g__UBA11524	s__
Ce28.496	MAG1066	0	0	0	607.278	522.14	130.535	<.0001	1.08446e-06	93.97	3.78	Ce	d__Bacteria	p__Firmicutes_A	c__Clostridia	Christensenellales	f__CAG-74	g__UBA11524	s__
Ce28.497	MAG1067	0	0	0	411.237	612.606	153.151	<.0001	8.28023e-06	80.87	1.01	Ce	d__Bacteria	p__Firmicutes_A	c__Clostridia	Lachnospirales	f__Lachnospiraceae	g__Eubacterium_G	s__
Ce28.500	MAG1068	0	0	0	572.314	693.881	173.47	<.0001	1.08446e-06	50.67	0.73	Ce	d__Bacteria	p__Firmicutes_A	c__Clostridia	Oscillospirales	f__Oscillospiraceae	g__Faecousia	s__
Ce28.502	MAG1069	0	0	0	460.715	655.079	163.77	<.0001	0.000161125	96.71	3.27	Ce	d__Bacteria	p__Bacteroidota	c__Bacteroidia	Bacteroidales	f__Rikenellaceae	g__Alistipes	s__Alistipes sp017465605
Ce28.505	MAG1070	0	0	0	865.072	792.102	198.025	<.0001	1.08446e-06	94.99	1.15	Ce	d__Bacteria	p__Firmicutes_A	c__Clostridia	Oscillospirales	f__Oscillospiraceae	g__Limivicinus	s__
Ce28.507	MAG1071	0	0	0	539.376	544.376	136.094	<.0001	1.08446e-06	83.19	2.91	Ce	d__Bacteria	p__Firmicutes_A	c__Clostridia	Lachnospirales	f__Lachnospiraceae	g__Acetatifactor	s__
Ce28.508	MAG1072	0	0	0	225.45	396.859	99.2149	0.0002	0.000400461	73.74	0.67	Ce	d__Bacteria	p__Firmicutes_A	c__Clostridia	Monoglobales	f__Monoglobaceae	g__	s__
Ce28.509	MAG1073	0	0	0	1541.96	630.061	157.515	<.0001	1.08446e-06	63.79	7.76	Ce	d__Bacteria	p__Firmicutes_A	c__Clostridia	Oscillospirales	f__Oscillospiraceae	g__Faecousia	s__
Ce28.510	MAG1074	0	0	0	299.486	772.073	193.018	0.0035	0.00478424	97.15	0.02	Ce	d__Bacteria	p__Firmicutes_A	c__Clostridia	UBA1381	f__UBA1381	g__UBA1738	s__
Ce28.512	MAG1075	0	0	0	941.489	425.526	106.382	<.0001	1.08446e-06	87.77	6.04	Ce	d__Bacteria	p__Firmicutes_A	c__Clostridia	Oscillospirales	f__Oscillospiraceae	g__Dysosmobacter	s__
Ce28.515	MAG1076	0	0	0	475.886	755.097	188.774	<.0001	2.32495e-05	75.17	0.67	Ce	d__Bacteria	p__Firmicutes_A	c__Clostridia	UMGS1883	f__UMGS1883	g__UMGS1883	s__
Ce28.516	MAG1077	0	0	0	276.67	342.827	85.7067	<.0001	6.30507e-05	80	2.92	Ce	d__Bacteria	p__Actinobacteriota	c__Actinomycetia	Actinomycetales	f__Bifidobacteriaceae	g__RGIG1476	s__RGIG1476 sp017413255
Ce28.517	MAG1078	0	0	0	297.072	623.212	155.803	<.0001	0.000161125	94.73	1.81	Ce	d__Bacteria	p__Firmicutes_A	c__Clostridia	Lachnospirales	f__Lachnospiraceae	g__Roseburia	s__
Ce28.518	MAG1079	0	0	0	169.12	369.513	92.3781	0.0171	0.0210099	90.76	1.36	Ce	d__Bacteria	p__Firmicutes_A	c__Clostridia	Oscillospirales	f__Acutalibacteraceae	g__Ruminococcus_E	s__
Ce28.521	MAG1080	0	0	0	850.015	2033.99	508.498	0.0079	0.0101688	91.28	2.01	Ce	d__Bacteria	p__Firmicutes_A	c__Clostridia	Oscillospirales	f__Acutalibacteraceae	g__UMGS172	s__
Ce28.522	MAG1081	0	0	0	1334.89	2080.98	520.246	<.0001	1.08446e-06	79.56	2.4	Ce	d__Bacteria	p__Firmicutes_A	c__Clostridia	Oscillospirales	f__Oscillospiraceae	g__Faecousia	s__
Ce28.525	MAG1082	0	0	0	379.92	642.646	160.661	0.0006	0.000956857	59.17	0.71	Ce	d__Bacteria	p__Firmicutes_A	c__Clostridia	RGIG6154	f__RGIG6154	g__RGIG2094	s__
Ce28.527	MAG1083	0	0	0	307.4	474.608	118.652	0.0002	0.000400461	58.52	0.77	Ce	d__Bacteria	p__Firmicutes_A	c__Clostridia	Lachnospirales	f__Lachnospiraceae	g__RGIG6307	s__
Ce28.528	MAG1084	0	0	0	264.005	809.067	202.267	0.0737	0.0837988	64.43	0	Ce	d__Bacteria	p__Firmicutes_A	c__Clostridia	Monoglobales	f__Monoglobaceae	g__UMGS1326	s__
Ce28.529	MAG1085	0	0	0	84.9376	239.462	59.8654	0.0359	0.0419998	73.31	2.91	Ce	d__Bacteria	p__Firmicutes_A	c__Clostridia	Oscillospirales	f__Acutalibacteraceae	g__UBA737	s__
Ce28.532	MAG1086	0	0	0	214.781	510.482	127.621	0.0015	0.00216609	78.02	0.13	Ce	d__Bacteria	p__Firmicutes_A	c__Clostridia	UMGS1883	f__UMGS1883	g__UMGS1883	s__
Ce28.534	MAG1087	0	0	0	777.966	931.235	232.809	<.0001	1.08446e-06	74.16	1.01	Ce	d__Bacteria	p__Firmicutes_A	c__Clostridia	Oscillospirales	f__Oscillospiraceae	g__Faecousia	s__
Ce28.536	MAG1088	0	0	0	442.695	378.829	94.7072	<.0001	2.90589e-06	91.83	3.69	Ce	d__Bacteria	p__Bacteroidota	c__Bacteroidia	Bacteroidales	f__Rikenellaceae	g__Alistipes	s__Alistipes sp015059845
Ce28.540	MAG1089	0	0	0	520.266	487.411	121.853	<.0001	2.90589e-06	92.22	5.94	Ce	d__Bacteria	p__Firmicutes_A	c__Clostridia	Christensenellales	f__CAG-74	g__UBA11524	s__UBA11524 sp017502305
Ce28.541	MAG1090	0	0	0	1150.47	2369.68	592.42	<.0001	8.28023e-06	88.63	1.42	Ce	d__Bacteria	p__Firmicutes_A	c__Clostridia	Lachnospirales	f__Lachnospiraceae	g__Faecalimonas	s__
Ce29.18	MAG1091	0	0	0	238.155	299.831	74.9577	<.0001	6.30507e-05	75.61	4.03	Ce	d__Bacteria	p__Firmicutes_A	c__Clostridia	Oscillospirales	f__Ruminococcaceae	g__Faeciplasma	s__
Ce29.29	MAG1092	0	0	0	162.471	209.81	52.4525	<.0001	2.32495e-05	74.57	1.6	Ce	d__Bacteria	p__Planctomycetota	c__Planctomycetia	Pirellulales	f__Thermoguttaceae	g__RGIG3701	s__RGIG3701 sp017408405
Ce29.36	MAG1093	0	0	0	152.031	238.13	59.5324	0.0002	0.000400461	79.36	3.04	Ce	d__Bacteria	p__Bacteroidota	c__Bacteroidia	Bacteroidales	f__Rikenellaceae	g__Alistipes	s__Alistipes sp017531305
Ce29.37	MAG1094	0	0	0	160.725	354.3	88.575	0.0737	0.0837988	92.35	3.93	Ce	d__Bacteria	p__Bacteroidota	c__Bacteroidia	Bacteroidales	f__Barnesiellaceae	g__Barnesiella_A	s__Barnesiella_A sp017532725
Ce29.45	MAG1095	0	0	0	676.322	599.107	149.777	<.0001	8.28023e-06	81.09	1.68	Ce	d__Bacteria	p__Firmicutes_A	c__Clostridia	Oscillospirales	f__Ruminococcaceae	g__UMGS1668	s__UMGS1668 sp017468365
Ce29.50	MAG1096	0	0	0	159.096	479.981	119.995	0.0171	0.0210099	83.71	0.16	Ce	d__Bacteria	p__Firmicutes_A	c__Clostridia	Christensenellales	f__UBA1242	g__Onthoplasma	s__
Ce29.51	MAG1097	0	0	0	336.746	721.63	180.408	0.0006	0.000956857	98.25	3.99	Ce	d__Bacteria	p__Firmicutes_A	c__Clostridia	UMGS1810	f__UMGS1810	g__RGIG8748	s__
Ce29.67	MAG1098	0	0	0	321.185	428.57	107.142	<.0001	0.000161125	69.76	5.32	Ce	d__Bacteria	p__Bacteroidota	c__Bacteroidia	Bacteroidales	f__UBA932	g__Egerieousia	s__
Ce29.75	MAG1099	0	0	0	159.219	380.685	95.1714	0.0171	0.0210099	88.73	3.2	Ce	d__Bacteria	p__Firmicutes_A	c__Clostridia	Oscillospirales	f__Acutalibacteraceae	g__Ruminococcus_E	s__
Ce29.78	MAG1100	0	0	0	245.982	265.854	66.4636	<.0001	2.32495e-05	91.98	4.9	Ce	d__Archaea	p__Halobacteriota	c__Methanomicrobia	Methanomicrobiales	f__Methanocorpusculaceae	g__Methanocorpusculum	s__Methanocorpusculum sp017622255
Ce29.82	MAG1101	0	0	0	834.269	1894.19	473.548	0.0015	0.00216609	80.36	3.97	Ce	d__Bacteria	p__Verrucomicrobiota	c__Verrucomicrobiae	Verrucomicrobiales	f__Akkermansiaceae	g__Akkermansia	s__Akkermansia sp017435365
Ce29.91	MAG1102	0	0	0	532.196	860.494	215.123	0.0015	0.00216609	99.04	2.35	Ce	d__Bacteria	p__Bacteroidota	c__Bacteroidia	Bacteroidales	f__Rikenellaceae	g__Alistipes	s__Alistipes sp017437045
Ce29.99	MAG1103	0	0	0	164.065	247.065	61.7661	0.0006	0.000956857	52.7	2.3	Ce	d__Bacteria	p__Proteobacteria	c__Alphaproteobacteria	RF32	f__UBA3637	g__RGIG4140	s__RGIG4140 sp015062385
Ce29.101	MAG1104	0	0	0	128.167	255.344	63.836	0.0171	0.0210099	62.51	1.75	Ce	d__Bacteria	p__Bacteroidota	c__Bacteroidia	Bacteroidales	f__Bacteroidaceae	g__HGM04593	s__HGM04593 sp017407905
Ce29.120	MAG1105	0	0	0	193.576	249.204	62.3011	0.0002	0.000400461	69.04	0.9	Ce	d__Bacteria	p__Firmicutes_A	c__Clostridia	Christensenellales	f__Borkfalkiaceae	g__UBA4636	s__UBA4636 sp017507595
Ce29.125	MAG1106	0	0	0	2322.31	2835.79	708.948	<.0001	6.30507e-05	95.95	0.5	Ce	d__Bacteria	p__Bacteroidota	c__Bacteroidia	Bacteroidales	f__UBA932	g__Egerieousia	s__Egerieousia sp017625535
Ce29.127	MAG1107	0	0	0	292.202	107.517	26.8793	<.0001	1.08446e-06	84.05	8.65	Ce	d__Bacteria	p__Firmicutes_A	c__Clostridia	Peptostreptococcales	f__Anaerovoracaceae	g__CAG-238	s__CAG-238 sp017436705
Ce29.136	MAG1108	416.191	522.184	130.546	396.555	424.866	106.216	0.9549	0.965108	53.73	8.56	R	d__Bacteria	p__Firmicutes_A	c__Clostridia	Oscillospirales	f__Acutalibacteraceae	g__Ruminococcus_E	s__
Ce29.215	MAG1109	0	0	0	859.017	2621.69	655.423	0.0079	0.0101688	89.51	4.7	Ce	d__Bacteria	p__Firmicutes_A	c__Clostridia	Oscillospirales	f__Acutalibacteraceae	g__RUG806	s__RUG806 sp015066205
Ce29.269	MAG1110	0	0	0	59.3481	217.256	54.3139	0.1508	0.165656	70.49	4.03	Ce	d__Bacteria	p__Firmicutes_A	c__Clostridia	Oscillospirales	f__Acutalibacteraceae	g__RGIG3009	s__
Ce29.310	MAG1111	457.211	518.071	129.518	965.972	1595.45	398.863	0.3655	0.386172	95.2	1.6	Ce	d__Archaea	p__Methanobacteriota	c__Methanobacteria	Methanobacteriales	f__Methanobacteriaceae	g__Methanobrevibacter	s__Methanobrevibacter sp902784195
Ce29.345	MAG1112	843.846	1313.05	328.262	744.854	1181.94	295.485	0.1689	0.18506	68.1	2.54	R	d__Bacteria	p__Firmicutes_A	c__Clostridia	TANB77	f__CAG-508	g__CAG-269	s__
Ce29.347	MAG1113	0	0	0	2015.04	1207.41	301.852	<.0001	1.08446e-06	90.57	2.06	Ce	d__Bacteria	p__Bacteroidota	c__Bacteroidia	Bacteroidales	f__Bacteroidaceae	g__Phocaeicola	s__Phocaeicola sp017503235
Ce29.376	MAG1114	0	0	0	136.565	179.003	44.7509	<.0001	6.30507e-05	79.34	3.42	Ce	d__Bacteria	p__Firmicutes_A	c__Clostridia	UMGS1883	f__UMGS1883	g__RGIG1927	s__RGIG1927 sp017440585
Ce29.382	MAG1115	0	0	0	721.345	460.57	115.142	<.0001	1.08446e-06	76.41	3.22	Ce	d__Bacteria	p__Firmicutes_A	c__Clostridia	Peptostreptococcales	f__Anaerovoracaceae	g__Copromorpha	s__Copromorpha sp017416795
Ce29.390	MAG1116	0	0	0	835.877	969.477	242.369	<.0001	1.08446e-06	74.27	6.99	Ce	d__Bacteria	p__Firmicutes_A	c__Clostridia	Oscillospirales	f__Oscillospiraceae	g__Faecousia	s__
Ce29.394	MAG1117	0	0	0	545.3	587.88	146.97	<.0001	8.28023e-06	54.7	3.34	Ce	d__Bacteria	p__Firmicutes_A	c__Clostridia	Oscillospirales	f__Acutalibacteraceae	g__UBA5905	s__
Ce29.395	MAG1118	0	0	0	515.257	188.754	47.1884	<.0001	1.08446e-06	52.6	7.43	Ce	d__Bacteria	p__Firmicutes_A	c__Clostridia	Oscillospirales	f__Ruminococcaceae	g__Negativibacillus	s__Negativibacillus sp017439985
Ce29.401	MAG1119	0	0	0	318.717	462.344	115.586	<.0001	0.000161125	83.08	5.82	Ce	d__Bacteria	p__Firmicutes_A	c__Clostridia	Monoglobales	f__Firm-18	g__UBA1775	s__
Ce29.418	MAG1120	253.046	199.595	49.8986	852.416	764.696	191.174	0.0195	0.02383	80.8	6.13	Ce	d__Archaea	p__Methanobacteriota	c__Methanobacteria	Methanobacteriales	f__Methanobacteriaceae	g__Methanobrevibacter_A	s__Methanobrevibacter_A sp900314695
Ce29.425	MAG1121	0	0	0	448.323	726.62	181.655	<.0001	6.30507e-05	71.57	0	Ce	d__Bacteria	p__Firmicutes_A	c__Clostridia	Oscillospirales	f__Acutalibacteraceae	g__Ruminococcus_E	s__
Ce29.428	MAG1122	5903.98	17156.6	4289.15	736.295	2152.06	538.016	0.2309	0.251104	100	0	R	d__Bacteria	p__Firmicutes_A	c__Clostridia	Saccharofermentanales	f__Saccharofermentanaceae	g__Saccharofermentans	s__
Ce29.440	MAG1123	0	0	0	717.689	364.112	91.0279	<.0001	1.08446e-06	90.25	2.3	Ce	d__Bacteria	p__Firmicutes_A	c__Clostridia	Lachnospirales	f__Lachnospiraceae	g__SZUA-448	s__
Ce29.441	MAG1124	0	0	0	152.49	609.961	152.49	0.3173	0.337339	87.36	0	Ce	d__Bacteria	p__Firmicutes_A	c__Clostridia	Oscillospirales	f__Acutalibacteraceae	g__UBA8612	s__UBA8612 sp017410325
Ce29.443	MAG1125	0	0	0	1012.47	1191.86	297.964	<.0001	1.08446e-06	66.73	0.84	Ce	d__Bacteria	p__Firmicutes_A	c__Clostridia	Oscillospirales	f__Oscillospiraceae	g__Faecousia	s__
Ce29.445	MAG1126	0	0	0	1447.68	2444.63	611.158	<.0001	2.90589e-06	93.33	1.4	Ce	d__Bacteria	p__Firmicutes_A	c__Clostridia	UBA1212	f__UBA1255	g__SIG424	s__SIG424 sp015069185
Ce29.450	MAG1127	198.632	145.166	36.2915	269.105	272.959	68.2398	0.386	0.406907	89.34	3.45	Ce	d__Bacteria	p__Firmicutes_A	c__Clostridia	Peptostreptococcales	f__Anaerovoracaceae	g__RUG099	s__
Ce29.453	MAG1128	0	0	0	366.285	409.678	102.42	<.0001	1.08446e-06	58.26	5.99	Ce	d__Bacteria	p__Firmicutes_A	c__Clostridia	Lachnospirales	f__Lachnospiraceae	g__CAG-95	s__
Ce29.454	MAG1129	0	0	0	1448.53	1662.57	415.641	<.0001	1.08446e-06	93.51	2.1	Ce	d__Bacteria	p__Firmicutes_A	c__Clostridia	Oscillospirales	f__Ruminococcaceae	g__UMGS1668	s__UMGS1668 sp017399765
Ce29.455	MAG1130	0	0	0	519.96	321.066	80.2666	<.0001	1.08446e-06	58.9	5.22	Ce	d__Bacteria	p__Firmicutes_A	c__Clostridia	Lachnospirales	f__Lachnospiraceae	g__RGIG423	s__
Ce29.456	MAG1131	0	0	0	273.562	536.002	134	0.0079	0.0101688	73.83	1.74	Ce	d__Bacteria	p__Firmicutes_A	c__Clostridia	Oscillospirales	f__CAG-382	g__RGIG5579	s__
Ce29.457	MAG1132	0	0	0	601.053	2404.21	601.053	0.3173	0.337339	98.08	0.96	Ce	d__Bacteria	p__Bacteroidota	c__Bacteroidia	Bacteroidales	f__Rikenellaceae	g__Alistipes	s__Alistipes sp017474235
Ce29.459	MAG1133	0	0	0	1729.59	2424.99	606.247	<.0001	2.32495e-05	86.62	0.02	Ce	d__Bacteria	p__Bacteroidota	c__Bacteroidia	Bacteroidales	f__F082	g__Limimorpha	s__Limimorpha sp015061295
Ce29.461	MAG1134	0	0	0	231.728	510.509	127.627	0.0171	0.0210099	95.56	1.21	Ce	d__Bacteria	p__Firmicutes_A	c__Clostridia	Christensenellales	f__CAG-138	g__RGIG3096	s__RGIG3096 sp017407205
Ce29.464	MAG1135	0	0	0	465.015	1402.16	350.54	0.0359	0.0419998	93.11	0.48	Ce	d__Bacteria	p__Bacteroidota	c__Bacteroidia	Bacteroidales	f__Rikenellaceae	g__Alistipes	s__Alistipes sp017403125
Ce29.466	MAG1136	0	0	0	298.192	772.219	193.055	0.0035	0.00478424	94.74	0	Ce	d__Bacteria	p__Firmicutes_A	c__Clostridia	Oscillospirales	f__CAG-382	g__SIG636	s__SIG636 sp017397805
Ce29.471	MAG1137	52.5893	95.8069	23.9517	1072.77	2424.07	606.018	<.0001	8.37767e-05	84.61	3.91	Ce	d__Bacteria	p__Firmicutes_A	c__Clostridia	TANB77	f__CAG-508	g__Scatovivens	s__
Ce29.472	MAG1138	0	0	0	3401.1	3099.96	774.991	<.0001	1.08446e-06	92.29	3.29	Ce	d__Bacteria	p__Bacteroidota	c__Bacteroidia	Bacteroidales	f__Bacteroidaceae	g__Phocaeicola	s__
Ce29.474	MAG1139	0	0	0	291.914	317.509	79.3773	<.0001	6.30507e-05	57.29	0	Ce	d__Bacteria	p__Firmicutes_A	c__Clostridia	Oscillospirales	f__CAG-272	g__RGIG3438	s__
Ce29.476	MAG1140	0	0	0	462.497	431.939	107.985	<.0001	6.30507e-05	60.32	3.51	Ce	d__Bacteria	p__Firmicutes_A	c__Clostridia	Oscillospirales	f__CAG-272	g__Avispirillum	s__
Ce29.477	MAG1141	0	0	0	421.439	740.287	185.072	<.0001	1.08446e-06	97.32	0.67	Ce	d__Bacteria	p__Firmicutes_A	c__Clostridia	Oscillospirales	f__Ruminococcaceae	g__Ruminiclostridium_E	s__
Ce29.479	MAG1142	0	0	0	1074.76	3112.68	778.169	<.0001	2.90589e-06	82.51	1.03	Ce	d__Bacteria	p__Firmicutes_A	c__Clostridia	Lachnospirales	f__Lachnospiraceae	g__UBA3766	s__
Ce29.480	MAG1143	0	0	0	1220.43	2174.25	543.563	<.0001	8.28023e-06	75.84	3.93	Ce	d__Bacteria	p__Firmicutes	c__Bacilli	RF39	f__UBA660	g__RGIG6635	s__
Ce29.485	MAG1144	0	0	0	1630.43	5592.31	1398.08	<.0001	0.000161125	89.66	9.2	Ce	d__Bacteria	p__Firmicutes_A	c__Clostridia	Oscillospirales	f__Acutalibacteraceae	g__UBA6857	s__UBA6857 sp017396515
Ce29.488	MAG1145	0	0	0	173.916	400.344	100.086	0.0171	0.0210099	94.16	2.52	Ce	d__Bacteria	p__Firmicutes_A	c__Clostridia	Oscillospirales	f__CAG-272	g__RGIG7300	s__RGIG7300 sp015065105
Ce29.490	MAG1146	0	0	0	4482.75	16816.6	4204.14	<.0001	0.000161125	95.55	3.73	Ce	d__Bacteria	p__Firmicutes_A	c__Clostridia	Oscillospirales	f__Ruminococcaceae	g__Ruminococcus	s__Ruminococcus sp015066935
Ce29.491	MAG1147	0	0	0	339.966	563.112	140.778	0.0002	0.000400461	77.23	2.75	Ce	d__Bacteria	p__Bacteroidota	c__Bacteroidia	Bacteroidales	f__Bacteroidaceae	g__HGM04593	s__HGM04593 sp015060835
Ce29.494	MAG1148	0	0	0	512.863	759.768	189.942	<.0001	1.08446e-06	93.35	0.84	Ce	d__Bacteria	p__Bacteroidota	c__Bacteroidia	Bacteroidales	f__Bacteroidaceae	g__Phocaeicola_A	s__
Ce29.496	MAG1149	0	0	0	1176.14	2385.03	596.258	<.0001	0.000161125	95.97	3.36	Ce	d__Bacteria	p__Firmicutes_A	c__Clostridia	Oscillospirales	f__Acutalibacteraceae	g__Ruminococcus_E	s__
Ce29.497	MAG1150	0	0	0	226.165	698.124	174.531	0.0015	0.00216609	80.29	0.17	Ce	d__Bacteria	p__Firmicutes_A	c__Clostridia	Oscillospirales	f__Acutalibacteraceae	g__Ruminococcus_E	s__
Ce29.500	MAG1151	0	0	0	245.649	586.643	146.661	0.0006	0.000956857	87.58	0.67	Ce	d__Bacteria	p__Firmicutes_A	c__Clostridia	Lachnospirales	f__Lachnospiraceae	g__CAG-127	s__
Ce29.502	MAG1152	0	0	0	523.629	1237.99	309.498	<.0001	8.28023e-06	94.08	2.39	Ce	d__Bacteria	p__Firmicutes_A	c__Clostridia	Lachnospirales	f__Lachnospiraceae	g__CAG-194	s__
Ce29.503	MAG1153	0	0	0	121.679	486.715	121.679	0.3173	0.337339	93.62	0.89	Ce	d__Bacteria	p__Firmicutes_A	c__Clostridia	Oscillospirales	f__CAG-272	g__CAG-272	s__
Ce29.510	MAG1154	0	0	0	251.3	828.502	207.126	0.0359	0.0419998	67.96	0	Ce	d__Bacteria	p__Firmicutes_A	c__Clostridia	Christensenellales	f__UBA1242	g__Caccovivens	s__
Ce29.513	MAG1155	0	0	0	113.321	382.288	95.5721	0.0737	0.0837988	78.38	3.93	Ce	d__Bacteria	p__Bacteroidota	c__Bacteroidia	Bacteroidales	f__Bacteroidaceae	g__HGM04593	s__HGM04593 sp015060965
Ce29.515	MAG1156	0	0	0	1835.88	5109.99	1277.5	0.0015	0.00216609	98.95	0.35	Ce	d__Bacteria	p__Spirochaetota	c__Spirochaetia	Treponematales	f__Treponemataceae	g__RGIG9060	s__RGIG9060 sp017936665
Ce29.516	MAG1157	0	0	0	1242.27	925.008	231.252	<.0001	1.08446e-06	68.5	5.03	Ce	d__Bacteria	p__Firmicutes_A	c__Clostridia	Oscillospirales	f__Oscillospiraceae	g__Faecousia	s__
Ce29.517	MAG1158	0	0	0	130.1	327.923	81.9809	0.0359	0.0419998	80.7	0	Ce	d__Bacteria	p__Firmicutes_A	c__Clostridia	Oscillospirales	f__JAAYXM01	g__RGIG7332	s__
Ce29.519	MAG1159	0	0	0	571.946	638.683	159.671	<.0001	8.28023e-06	67.36	1.7	Ce	d__Bacteria	p__Firmicutes_A	c__Clostridia	UMGS1883	f__UMGS1883	g__UMGS1883	s__
Ce29.523	MAG1160	0	0	0	360.464	1179.82	294.955	<.0001	0.000161125	96.31	0	Ce	d__Bacteria	p__Firmicutes_A	c__Clostridia	Lachnospirales	f__Lachnospiraceae	g__CAG-590	s__
Ce29.524	MAG1161	0	0	0	1828.56	1997.31	499.327	<.0001	1.08446e-06	95.37	5.06	Ce	d__Bacteria	p__Firmicutes_C	c__Negativicutes	Acidaminococcales	f__Acidaminococcaceae	g__Phascolarctobacterium_A	s__Phascolarctobacterium_A sp017623055
Ce29.526	MAG1162	0	0	0	400.283	973.727	243.432	0.0035	0.00478424	98.08	2.32	Ce	d__Bacteria	p__Firmicutes_A	c__Clostridia	Lachnospirales	f__Lachnospiraceae	g__UBA3766	s__
Ce30.4	MAG1163	0	0	0	313.761	820.173	205.043	0.0171	0.0210099	89.42	1.36	Ce	d__Bacteria	p__Firmicutes_A	c__Clostridia	UMGS1840	f__UMGS1840	g__SIG452	s__
Ce30.12	MAG1164	0	0	0	217.221	657.819	164.455	0.1508	0.165656	68.01	2.37	Ce	d__Bacteria	p__Bacteroidota	c__Bacteroidia	Bacteroidales	f__Rikenellaceae	g__Alistipes	s__Alistipes sp015060005
Ce30.24	MAG1165	0	0	0	1651.83	1485.51	371.377	<.0001	1.08446e-06	90.44	3.12	Ce	d__Bacteria	p__Bacteroidota	c__Bacteroidia	Bacteroidales	f__UBA932	g__Cryptobacteroides	s__Cryptobacteroides sp017626555
Ce30.25	MAG1166	0	0	0	1109.63	3281.71	820.429	0.0002	0.000400461	98.08	0.48	Ce	d__Bacteria	p__Bacteroidota	c__Bacteroidia	Bacteroidales	f__Rikenellaceae	g__Alistipes	s__Alistipes sp017465055
Ce30.33	MAG1167	0	0	0	1230.67	3118.15	779.538	<.0001	2.90589e-06	94.41	1.01	Ce	d__Bacteria	p__Firmicutes_A	c__Clostridia	Oscillospirales	f__Ruminococcaceae	g__UMGS1668	s__UMGS1668 sp015067125
Ce30.39	MAG1168	0	0	0	376.166	1172.4	293.101	0.0006	0.000956857	83.6	4.74	Ce	d__Bacteria	p__Bacteroidota	c__Bacteroidia	Bacteroidales	f__Rikenellaceae	g__Alistipes	s__Alistipes sp017399485
Ce30.48	MAG1169	0	0	0	555.009	985.665	246.416	<.0001	6.30507e-05	64.71	6.53	Ce	d__Bacteria	p__Firmicutes	c__Bacilli	Haloplasmatales_A	f__Turicibacteraceae	g__Turicibacter	s__
Ce30.55	MAG1170	0	0	0	1667.13	6537.68	1634.42	0.1508	0.165656	99.43	0.75	Ce	d__Bacteria	p__Bacteroidota	c__Bacteroidia	Bacteroidales	f__Muribaculaceae	g__CAG-485	s__
Ce30.57	MAG1171	0	0	0	800.646	1910.62	477.655	<.0001	0.000161125	99.72	6.27	Ce	d__Bacteria	p__Firmicutes	c__Bacilli	Erysipelotrichales	f__Coprobacillaceae	g__MGBC113645	s__
Ce30.58	MAG1172	1066.39	2645.68	661.42	630.681	1797.06	449.266	0.4126	0.433403	99.33	0.67	R	d__Bacteria	p__Firmicutes_A	c__Clostridia	Oscillospirales	f__Acutalibacteraceae	g__Ruminococcus_E	s__Ruminococcus_E sp902776975
Ce30.62	MAG1173	0	0	0	2665.21	10660.9	2665.21	0.3173	0.337339	99.67	0	Ce	d__Bacteria	p__Proteobacteria	c__Gammaproteobacteria	Enterobacterales	f__Succinivibrionaceae	g__Succinivibrio	s__Succinivibrio sp003456415
Ce30.63	MAG1174	0	0	0	200.286	413.114	103.278	0.0171	0.0210099	55.69	2.42	Ce	d__Bacteria	p__Verrucomicrobiota	c__Verrucomicrobiae	Opitutales	f__UBA953	g__Spyradosoma	s__Spyradosoma sp015061905
Ce30.64	MAG1175	0	0	0	1024.67	1892.68	473.17	<.0001	2.32495e-05	82.5	0.83	Ce	d__Bacteria	p__Actinobacteriota	c__Actinomycetia	Actinomycetales	f__Bifidobacteriaceae	g__RGIG1476	s__RGIG1476 sp017413255
Ce30.69	MAG1176	0	0	0	987.762	2404.6	601.15	<.0001	1.08446e-06	83.25	2.06	Ce	d__Bacteria	p__Bacteroidota	c__Bacteroidia	Bacteroidales	f__UBA932	g__Cryptobacteroides	s__Cryptobacteroides sp015060205
Ce30.73	MAG1177	2360.91	5564.5	1391.12	319.852	731.849	182.962	0.6346	0.65578	60.78	5.72	R	d__Bacteria	p__Firmicutes_A	c__Clostridia	Saccharofermentanales	f__Saccharofermentanaceae	g__Saccharofermentans	s__Saccharofermentans sp017427465
Ce30.74	MAG1178	0	0	0	673.786	1141.84	285.461	<.0001	6.30507e-05	95.3	3.1	Ce	d__Bacteria	p__Firmicutes_A	c__Clostridia	UMGS1883	f__UMGS1540	g__SIG447	s__
Ce30.162	MAG1179	0	0	0	549.833	2111.59	527.899	0.0079	0.0101688	99.93	0.1	Ce	d__Bacteria	p__Proteobacteria	c__Gammaproteobacteria	Enterobacterales	f__Enterobacteriaceae	g__Escherichia	s__Escherichia coli
Ce30.193	MAG1180	0	0	0	666.79	796.585	199.146	<.0001	1.08446e-06	64.26	3.87	Ce	d__Bacteria	p__Bacteroidota	c__Bacteroidia	Bacteroidales	f__Bacteroidaceae	g__Bacteroides	s__Bacteroides xylanisolvens
Ce30.195	MAG1181	0	0	0	21967.9	37400.9	9350.21	<.0001	2.32495e-05	96.96	0	Ce	d__Bacteria	p__Firmicutes_A	c__Clostridia	Oscillospirales	f__Acutalibacteraceae	g__RUG806	s__RUG806 sp015065425
Ce30.201	MAG1182	0	0	0	1901.37	6887.13	1721.78	0.0006	0.000956857	91.64	8.11	Ce	d__Bacteria	p__Bacteroidota	c__Bacteroidia	Bacteroidales	f__G3-4614	g__Caccoplasma	s__Caccoplasma sp015061035
Ce30.203	MAG1183	0	0	0	1670.72	2578.04	644.509	0.0006	0.000956857	95.66	0	Ce	d__Bacteria	p__Bacteroidota	c__Bacteroidia	Bacteroidales	f__Muribaculaceae	g__RGIG4079	s__RGIG4079 sp017396945
Ce30.205	MAG1184	0	0	0	670.328	709.148	177.287	<.0001	1.08446e-06	89.09	3.96	Ce	d__Bacteria	p__Firmicutes_A	c__Clostridia	Peptostreptococcales	f__Anaerovoracaceae	g__RGIG9096	s__
Ce30.208	MAG1185	0	0	0	1098.49	562.048	140.512	<.0001	1.08446e-06	80.87	5.32	Ce	d__Bacteria	p__Firmicutes_A	c__Clostridia	Oscillospirales	f__Ruminococcaceae	g__Negativibacillus	s__Negativibacillus sp017439985
Ce30.211	MAG1186	0	0	0	753.851	1082.56	270.639	<.0001	1.08446e-06	68.82	2.52	Ce	d__Bacteria	p__Firmicutes_A	c__Clostridia	Oscillospirales	f__Oscillospiraceae	g__HGM13010	s__
Ce30.213	MAG1187	0	0	0	1085.14	1913.41	478.353	0.0002	0.000400461	84.86	1.06	Ce	d__Bacteria	p__Firmicutes_A	c__Clostridia	Oscillospirales	f__Acutalibacteraceae	g__SIG565	s__SIG565 sp015066405
Ce30.215	MAG1188	0	0	0	754.988	827.141	206.785	<.0001	1.08446e-06	65.58	2.41	Ce	d__Bacteria	p__Firmicutes_B	c__Peptococcia	Peptococcales	f__Peptococcaceae	g__UBA7185	s__UBA7185 sp017399005
Ce30.227	MAG1189	0	0	0	734.411	1613.29	403.324	<.0001	1.08446e-06	64.62	3.48	Ce	d__Bacteria	p__Firmicutes_A	c__Clostridia	Lachnospirales	f__Lachnospiraceae	g__Faecalimonas	s__
Ce30.229	MAG1190	0	0	0	1001.12	3885.08	971.269	0.0737	0.0837988	97.84	0.96	Ce	d__Bacteria	p__Bacteroidota	c__Bacteroidia	Bacteroidales	f__Rikenellaceae	g__Alistipes	s__Alistipes sp015059805
Ce30.231	MAG1191	0	0	0	675.191	2595.13	648.782	0.1508	0.165656	97.2	0	Ce	d__Bacteria	p__Spirochaetota	c__Spirochaetia	Treponematales	f__Treponemataceae	g__Treponema_D	s__Treponema_D sp017622055
Ce30.235	MAG1192	0	0	0	668.722	1975.04	493.76	0.0171	0.0210099	92.45	0.94	Ce	d__Bacteria	p__Firmicutes	c__Bacilli	Erysipelotrichales	f__Erysipelotrichaceae	g__Longicatena	s__
Ce30.236	MAG1193	0	0	0	641.397	1409.49	352.372	0.0035	0.00478424	85.26	1.36	Ce	d__Bacteria	p__Verrucomicrobiota	c__Verrucomicrobiae	Verrucomicrobiales	f__Akkermansiaceae	g__Akkermansia	s__Akkermansia sp017415555
Ce30.237	MAG1194	0	0	0	1855.01	2134.53	533.633	<.0001	1.08446e-06	62.74	7.33	Ce	d__Bacteria	p__Bacteroidota	c__Bacteroidia	Bacteroidales	f__Bacteroidaceae	g__Phocaeicola	s__Phocaeicola sp015060765
Ce30.241	MAG1195	0	0	0	477.145	440.693	110.173	<.0001	1.08446e-06	79.95	3.49	Ce	d__Bacteria	p__Firmicutes_A	c__Clostridia	Oscillospirales	f__Ruminococcaceae	g__RGIG3102	s__RGIG3102 sp017442085
Ce30.243	MAG1196	0	0	0	759.579	1857	464.249	0.0015	0.00216609	85	2.31	Ce	d__Bacteria	p__Verrucomicrobiota	c__Verrucomicrobiae	Verrucomicrobiales	f__Akkermansiaceae	g__Akkermansia	s__Akkermansia sp017435365
Ce30.246	MAG1197	0	0	0	1048.1	3484.69	871.171	0.0079	0.0101688	93.02	2.23	Ce	d__Bacteria	p__Bacteroidota	c__Bacteroidia	Bacteroidales	f__Bacteroidaceae	g__HGM04593	s__
Ce30.248	MAG1198	0	0	0	795.592	386.832	96.7081	<.0001	1.08446e-06	79.17	4.91	Ce	d__Bacteria	p__Firmicutes_B	c__Peptococcia	Peptococcales	f__Peptococcaceae	g__UBA7185	s__UBA7185 sp017622155
Ce30.249	MAG1199	5049.5	15392	3848	804.377	1622.05	405.513	0.8191	0.839058	91.94	2.67	R	d__Archaea	p__Methanobacteriota	c__Methanobacteria	Methanobacteriales	f__Methanobacteriaceae	g__Methanobrevibacter_A	s__
R7.3	MAG1200	166.381	539.503	134.876	36.1748	128.05	32.0125	0.3469	0.36693	91.38	3.96	R	d__Bacteria	p__Firmicutes_A	c__Clostridia	Lachnospirales	f__Lachnospiraceae	g__RUG12461	s__
R7.11	MAG1201	472.332	485.367	121.342	0	0	0	<.0001	6.30507e-05	80.12	3.52	R	d__Bacteria	p__Bacteroidota	c__Bacteroidia	Bacteroidales	f__UBA932	g__Cryptobacteroides	s__Cryptobacteroides sp017429885
R7.38	MAG1202	236.115	274.111	68.5276	0	0	0	<.0001	8.28023e-06	68.32	3.91	R	d__Bacteria	p__Firmicutes_C	c__Negativicutes	Selenomonadales	f__Selenomonadaceae	g__Anaerovibrio	s__Anaerovibrio lipolyticus
R7.43	MAG1203	554.402	748.609	187.152	0	0	0	<.0001	1.08446e-06	95.71	1.43	R	d__Bacteria	p__Bacteroidota	c__Bacteroidia	Bacteroidales	f__UBA932	g__Cryptobacteroides	s__Cryptobacteroides sp902801885
R7.53	MAG1204	249.402	298.472	74.6181	0	0	0	<.0001	2.32495e-05	81.46	3.06	R	d__Bacteria	p__Bacteroidota	c__Bacteroidia	Bacteroidales	f__Paludibacteraceae	g__RF16	s__
R7.72	MAG1205	311.253	504.09	126.023	0	0	0	<.0001	1.08446e-06	97.9	0	R	d__Bacteria	p__Spirochaetota	c__Spirochaetia	Treponematales	f__Treponemataceae	g__Treponema_D	s__Treponema_D sp002373205
R7.77	MAG1206	216.674	242.746	60.6865	129.547	149.902	37.4756	0.2984	0.322069	53.61	7.94	R	d__Bacteria	p__Firmicutes_A	c__Clostridia	Oscillospirales	f__Acutalibacteraceae	g__Ruminococcus_E	s__
R7.83	MAG1207	1533.12	4182.25	1045.56	37.4724	110.374	27.5935	<.0001	8.28023e-06	98.66	1.68	R	d__Bacteria	p__Firmicutes_A	c__Clostridia	Lachnospirales	f__Lachnospiraceae	g__Eubacterium_Q	s__Eubacterium_Q sp017519155
R7.84	MAG1208	306.599	412.697	103.174	22.8215	57.9869	14.4967	<.0001	1.48168e-05	74.21	3.38	R	d__Bacteria	p__Verrucomicrobiota	c__Kiritimatiellae	RFP12	f__UBA1067	g__RUG572	s__
R7.88	MAG1209	280.306	590.487	147.622	0	0	0	0.0006	0.000956857	96.58	3.38	R	d__Bacteria	p__Firmicutes_A	c__Clostridia	Oscillospirales	f__Ruminococcaceae	g__Firm-04	s__Firm-04 sp017550285
R7.93	MAG1210	89.3463	314.771	78.6929	0	0	0	0.1508	0.165656	72.08	3.85	R	d__Bacteria	p__Bacteroidota	c__Bacteroidia	Bacteroidales	f__SZUA-534	g__RUG13583	s__
R7.96	MAG1211	416.404	1106.97	276.742	5.92364	23.6945	5.92364	0.1211	0.136287	73.31	0.23	R	d__Bacteria	p__Firmicutes_A	c__Clostridia	Christensenellales	f__UBA1242	g__Caccovivens	s__
R7.116	MAG1212	1239.94	3877.11	969.277	0	0	0	0.0171	0.0210099	94.15	3.18	R	d__Bacteria	p__Bacteroidota	c__Bacteroidia	Bacteroidales	f__Muribaculaceae	g__Sodaliphilus	s__Sodaliphilus sp900318345
R7.143	MAG1213	6287.85	11670.8	2917.71	0	0	0	<.0001	1.08446e-06	85.73	2.55	R	d__Bacteria	p__Bacteroidota	c__Bacteroidia	Bacteroidales	f__Bacteroidaceae	g__Prevotella	s__Prevotella sp902778535
R7.178	MAG1214	1057.28	1991	497.749	17.9007	47.9829	11.9957	<.0001	2.40898e-06	72.09	6.07	R	d__Bacteria	p__Bacteroidota	c__Bacteroidia	Bacteroidales	f__Bacteroidaceae	g__UBA1179	s__UBA1179 sp902782245
R7.257	MAG1215	10186.1	19114.4	4778.59	0	0	0	<.0001	1.08446e-06	67.53	2.2	R	d__Bacteria	p__Bacteroidota	c__Bacteroidia	Bacteroidales	f__Bacteroidaceae	g__Prevotella	s__
R7.260	MAG1216	3005.47	3989.23	997.309	42.405	149.704	37.4259	0.0006	0.000956857	100	1.4	R	d__Bacteria	p__Spirochaetota	c__Spirochaetia	Treponematales	f__Treponemataceae	g__Treponema_D	s__Treponema_D sp002309195
R7.280	MAG1217	321.403	333.079	83.2698	0	0	0	<.0001	1.08446e-06	67.19	2.48	R	d__Bacteria	p__Spirochaetota	c__Spirochaetia	Sphaerochaetales	f__Sphaerochaetaceae	g__UBA9732	s__UBA9732 sp017470995
R7.282	MAG1218	214.192	277.98	69.4951	0	0	0	0.0006	0.000956857	66.96	0.89	R	d__Bacteria	p__Firmicutes_A	c__Clostridia	Oscillospirales	f__UBA644	g__HGM12619	s__HGM12619 sp902783255
R7.283	MAG1219	198.996	277.355	69.3387	142.209	186.568	46.642	0.8191	0.839058	82.26	4.13	R	d__Bacteria	p__Firmicutes_A	c__Clostridia	Oscillospirales	f__Acutalibacteraceae	g__Ruminococcus_E	s__Ruminococcus_E sp900316555
R7.295	MAG1220	806.326	2340.15	585.037	115.753	345.792	86.4481	0.0996	0.112561	60.4	1.28	R	d__Bacteria	p__Patescibacteria	c__Saccharimonadia	Saccharimonadales	f__Nanosyncoccaceae	g__UBA2834	s__
R7.300	MAG1221	353.522	942.73	235.683	109.726	299.745	74.9362	0.89	0.905721	81.58	0.16	R	d__Bacteria	p__Patescibacteria	c__Saccharimonadia	Saccharimonadales	f__Nanosyncoccaceae	g__Nanosyncoccus	s__
R7.315	MAG1222	1248.66	1685.07	421.266	0	0	0	<.0001	1.08446e-06	93.17	6.21	R	d__Bacteria	p__Bacteroidota	c__Bacteroidia	Bacteroidales	f__UBA932	g__Cryptobacteroides	s__Cryptobacteroides sp900317065
R7.316	MAG1223	214.421	389.998	97.4996	4.72131	18.8852	4.72131	0.0003	0.000409743	82.22	3.6	R	d__Bacteria	p__Firmicutes_A	c__Clostridia	Oscillospirales	f__Ruminococcaceae	g__Ruminococcus_D	s__Ruminococcus_D albus_A
R7.319	MAG1224	376.894	405.828	101.457	1.95259	7.81037	1.95259	<.0001	5.5086e-06	94.06	2.24	R	d__Bacteria	p__Spirochaetota	c__Spirochaetia	Treponematales	f__Treponemataceae	g__UBA1240	s__UBA1240 sp001603145
R7.320	MAG1225	684.351	1093.89	273.473	14.4399	39.4638	9.86594	<.0001	2.84927e-06	97.34	1.74	R	d__Bacteria	p__Firmicutes_A	c__Clostridia	Lachnospirales	f__Lachnospiraceae	g__AC2028	s__AC2028 sp902761225
R7.321	MAG1226	389.763	469.514	117.379	0	0	0	<.0001	1.08446e-06	91.93	2.69	R	d__Bacteria	p__Firmicutes_A	c__Clostridia	Lachnospirales	f__Lachnospiraceae	g__RUG11977	s__RUG11977 sp016288005
R7.323	MAG1227	595.608	1927.28	481.821	0	0	0	0.1508	0.165656	92.19	0.54	R	d__Bacteria	p__Bacteroidota	c__Bacteroidia	Bacteroidales	f__P3	g__UBA1711	s__
R7.324	MAG1228	869.913	876.374	219.093	0	0	0	<.0001	1.08446e-06	98.52	0.63	R	d__Bacteria	p__Firmicutes_C	c__Negativicutes	Selenomonadales	f__Selenomonadaceae	g__RUG12372	s__
R7.328	MAG1229	377.876	673.967	168.492	0	0	0	<.0001	2.32495e-05	94.68	1.9	R	d__Bacteria	p__Bacteroidota	c__Bacteroidia	Bacteroidales	f__UBA932	g__RUG11257	s__RUG11257 sp017428035
R7.333	MAG1230	976.09	2373.64	593.411	38.3175	94.1186	23.5296	0.0029	0.00406753	97.87	0.33	R	d__Bacteria	p__Firmicutes_A	c__Clostridia	Saccharofermentanales	f__Saccharofermentanaceae	g__Saccharofermentans	s__Saccharofermentans sp902775565
R7.336	MAG1231	498.463	1707.05	426.763	0	0	0	0.0079	0.0101688	94.84	9.14	R	d__Bacteria	p__Bacteroidota	c__Bacteroidia	Bacteroidales	f__P3	g__UBA1711	s__UBA1711 sp900316235
R7.337	MAG1232	635.189	727.236	181.809	0	0	0	<.0001	1.08446e-06	90.92	2.47	R	d__Bacteria	p__Bacteroidota	c__Bacteroidia	Bacteroidales	f__Bacteroidaceae	g__Prevotella	s__Prevotella sp002372575
R7.338	MAG1233	303.065	530.885	132.721	6.39556	18.8367	4.70917	0.0007	0.00107155	94.03	1.36	R	d__Bacteria	p__Firmicutes_A	c__Clostridia	Lachnospirales	f__Lachnospiraceae	g__RUG306	s__
R7.341	MAG1234	470.854	1206.79	301.696	0	0	0	0.0035	0.00478424	97.62	0.26	R	d__Bacteria	p__Bacteroidota	c__Bacteroidia	Bacteroidales	f__UBA932	g__Cryptobacteroides	s__Cryptobacteroides sp900167925
R7.344	MAG1235	1065.15	1600.28	400.069	0	0	0	<.0001	1.08446e-06	74.83	1.03	R	d__Bacteria	p__Firmicutes_A	c__Clostridia	Oscillospirales	f__Oscillospiraceae	g__RGIG7114	s__
R7.345	MAG1236	815.557	1503.91	375.978	0	0	0	<.0001	1.08446e-06	79.33	2.14	R	d__Bacteria	p__Bacteroidota	c__Bacteroidia	Bacteroidales	f__UBA932	g__Bact-11	s__Bact-11 sp902789445
R7.348	MAG1237	732.68	686.924	171.731	0	0	0	<.0001	1.08446e-06	80.27	2.09	R	d__Bacteria	p__Bacteroidota	c__Bacteroidia	Bacteroidales	f__UBA932	g__Cryptobacteroides	s__Cryptobacteroides sp902768985
R7.349	MAG1238	538.734	427.225	106.806	0	0	0	<.0001	1.08446e-06	91.51	3.81	R	d__Bacteria	p__Bacteroidota	c__Bacteroidia	Bacteroidales	f__UBA932	g__Cryptobacteroides	s__Cryptobacteroides sp017437825
R7.350	MAG1239	340.348	380.976	95.244	0	0	0	<.0001	8.28023e-06	72.94	0.92	R	d__Bacteria	p__Firmicutes_A	c__Clostridia	Oscillospirales	f__CAG-272	g__UBA1248	s__UBA1248 sp902778145
R7.351	MAG1240	125.853	446.325	111.581	6.99231	27.9693	6.99231	0.1703	0.186389	85.29	1.36	R	d__Bacteria	p__Firmicutes_A	c__Clostridia	Oscillospirales	f__Oscillospiraceae	g__Faecousia	s__
R7.352	MAG1241	460.746	266.152	66.5381	0	0	0	<.0001	1.08446e-06	83.08	3.43	R	d__Bacteria	p__Firmicutes_A	c__Clostridia	Peptostreptococcales	f__Anaerovoracaceae	g__RUG11894	s__RUG11894 sp017626845
R7.356	MAG1242	188.861	377.596	94.399	7.47721	20.852	5.21301	0.1596	0.175263	55.64	1.12	R	d__Bacteria	p__Patescibacteria	c__Saccharimonadia	Saccharimonadales	f__Nanosyncoccaceae	g__UBA2834	s__UBA2834 sp016290315
R7.357	MAG1243	1118.23	1392.02	348.004	260.476	520.271	130.068	0.0005	0.00079883	68.54	1.5	R	d__Bacteria	p__Firmicutes	c__Bacilli	RF39	f__UBA660	g__CAG-1000	s__
R7.363	MAG1244	976.602	1309.68	327.421	0	0	0	<.0001	2.90589e-06	77.69	0.28	R	d__Bacteria	p__Bacteroidota	c__Bacteroidia	Bacteroidales	f__Bacteroidaceae	g__Prevotella	s__Prevotella sp002393725
R7.365	MAG1245	510.921	641.876	160.469	0	0	0	<.0001	6.30507e-05	89.43	1.45	R	d__Bacteria	p__Bacteroidota	c__Bacteroidia	Bacteroidales	f__Muribaculaceae	g__Sodaliphilus	s__Sodaliphilus sp900318065
R7.369	MAG1246	790.281	674.047	168.512	0	0	0	<.0001	1.08446e-06	71.69	0.37	R	d__Bacteria	p__Bacteroidota	c__Bacteroidia	Bacteroidales	f__Bacteroidaceae	g__UBA4334	s__UBA4334 sp900316975
R7.373	MAG1247	143.73	270.008	67.5021	0	0	0	0.0002	0.000400461	84.13	1.07	R	d__Bacteria	p__Firmicutes_A	c__Clostridia	Oscillospirales	f__Acutalibacteraceae	g__CAG-177	s__CAG-177 sp900319455
R7.379	MAG1248	450.421	894.107	223.527	0	0	0	<.0001	6.30507e-05	87.16	3.21	R	d__Bacteria	p__Bacteroidota	c__Bacteroidia	Bacteroidales	f__Bacteroidaceae	g__Prevotella	s__Prevotella sp900315455
R7.380	MAG1249	1929.88	2402.6	600.65	0	0	0	<.0001	1.08446e-06	88.16	0.95	R	d__Bacteria	p__Bacteroidota	c__Bacteroidia	Bacteroidales	f__UBA932	g__Cryptobacteroides	s__
R7.382	MAG1250	249.6	842.934	210.734	21.5843	86.3371	21.5843	0.0478	0.0557237	62.82	1.28	R	d__Bacteria	p__Patescibacteria	c__Saccharimonadia	Saccharimonadales	f__Nanosyncoccaceae	g__UBA2834	s__
R7.384	MAG1251	653.014	1125.35	281.337	12.2475	34.5631	8.64078	<.0001	2.84927e-06	91.25	0	R	d__Bacteria	p__Firmicutes	c__Bacilli	RF39	f__UBA660	g__RUG12783	s__
R7.388	MAG1252	1900.09	4076.12	1019.03	227.508	264.115	66.0287	0.0029	0.00404378	87.72	3.51	R	d__Bacteria	p__Firmicutes	c__Bacilli	RF39	f__UBA660	g__UBA3789	s__
R7.391	MAG1253	418.265	575.624	143.906	266.22	278.974	69.7435	0.3089	0.332866	91.53	5.18	R	d__Bacteria	p__Firmicutes_A	c__Clostridia	Christensenellales	f__CAG-74	g__UBA2862	s__
R7.394	MAG1254	1176.62	1872.43	468.108	0	0	0	<.0001	8.28023e-06	89.14	1.77	R	d__Bacteria	p__Bacteroidota	c__Bacteroidia	Bacteroidales	f__Bacteroidaceae	g__Prevotella	s__Prevotella sp900316285
R7.395	MAG1255	1140.38	2384.64	596.16	174.944	221.799	55.4498	0.0138	0.0175599	82.02	1.12	R	d__Bacteria	p__Firmicutes	c__Bacilli	RF39	f__UBA660	g__RUG705	s__
R7.396	MAG1256	337.246	595.188	148.797	4.43152	17.7261	4.43152	<.0001	0.000133023	58.07	0.56	R	d__Bacteria	p__Firmicutes	c__Bacilli	RF39	f__UBA660	g__RUG12783	s__
R7.398	MAG1257	405.759	921.373	230.343	0	0	0	0.0002	0.000400461	96.5	1.01	R	d__Bacteria	p__Firmicutes_A	c__Clostridia	Lachnospirales	f__Lachnospiraceae	g__UBA1258	s__
R7.399	MAG1258	332.213	653.778	163.444	0	0	0	0.0015	0.00216609	56.74	0.75	R	d__Bacteria	p__Bacteroidota	c__Bacteroidia	Bacteroidales	f__UBA3663	g__UBA3663	s__
R7.402	MAG1259	352.052	277.142	69.2856	0	0	0	<.0001	1.08446e-06	75.56	4.24	R	d__Bacteria	p__Bacteroidota	c__Bacteroidia	Bacteroidales	f__UBA932	g__Cryptobacteroides	s__Cryptobacteroides sp900317925
R7.403	MAG1260	1130.6	1671.1	417.775	617.426	1156.03	289.007	0.1804	0.19712	80.14	2.91	R	d__Bacteria	p__Firmicutes_A	c__Clostridia	TANB77	f__CAG-508	g__Scatovivens	s__
R7.404	MAG1261	690.848	1059.15	264.787	185.457	128.11	32.0274	0.1741	0.190449	80.34	3.82	R	d__Bacteria	p__Firmicutes	c__Bacilli	RF39	f__UBA660	g__UBA5026	s__
R8.4	MAG1262	69.1472	252.448	63.112	6.18363	24.7345	6.18363	0.5511	0.573251	82.84	1.07	R	d__Bacteria	p__Firmicutes_A	c__Clostridia	Oscillospirales	f__Ruminococcaceae	g__Ruminococcus	s__Ruminococcus sp017543335
R8.9	MAG1263	330.108	308.65	77.1625	0	0	0	<.0001	8.28023e-06	81.12	3.05	R	d__Bacteria	p__Bacteroidota	c__Bacteroidia	Bacteroidales	f__Bacteroidaceae	g__UBA2918	s__UBA2918 sp902788865
R8.21	MAG1264	1270.99	1622.32	405.58	0	0	0	<.0001	2.32495e-05	50.18	6.86	R	d__Bacteria	p__Firmicutes_A	c__Clostridia	Lachnospirales	f__Lachnospiraceae	g__UBA3633	s__
R8.22	MAG1265	220.856	286.413	71.6031	0	0	0	<.0001	6.30507e-05	84.8	2.41	R	d__Bacteria	p__Firmicutes_A	c__Clostridia	Lachnospirales	f__Lachnospiraceae	g__NK4A136	s__NK4A136 sp017634975
R8.30	MAG1266	320.831	194.709	48.6772	277.743	570.567	142.642	0.0222	0.0270523	50.87	4.8	R	d__Archaea	p__Methanobacteriota	c__Methanobacteria	Methanobacteriales	f__Methanobacteriaceae	g__Methanobrevibacter_A	s__
R8.32	MAG1267	380.009	1278.61	319.653	0	0	0	0.0171	0.0210099	99.2	0.34	R	d__Bacteria	p__Firmicutes_A	c__Clostridia	Oscillospirales	f__Ruminococcaceae	g__Firm-04	s__Firm-04 sp001940925
R8.41	MAG1268	624.109	955.786	238.946	0	0	0	0.0015	0.00216609	94.15	1.65	R	d__Bacteria	p__Bacteroidota	c__Bacteroidia	Bacteroidales	f__Muribaculaceae	g__Sodaliphilus	s__
R8.44	MAG1269	97.0486	263.338	65.8345	0	0	0	0.0079	0.0101688	64.98	1.88	R	d__Bacteria	p__Bacteroidota	c__Bacteroidia	Bacteroidales	f__Bacteroidaceae	g__Prevotella	s__
R8.49	MAG1270	1960.16	4708.84	1177.21	2.11972	8.47888	2.11972	<.0001	1.44132e-05	100	1.65	R	d__Bacteria	p__Fibrobacterota	c__Fibrobacteria	Fibrobacterales	f__Fibrobacteraceae	g__Fibrobacter	s__Fibrobacter succinogenes_J
R8.58	MAG1271	435.523	299.315	74.8287	0	0	0	<.0001	1.08446e-06	61.19	3.89	R	d__Bacteria	p__Bacteroidota	c__Bacteroidia	Bacteroidales	f__UBA932	g__Cryptobacteroides	s__Cryptobacteroides sp017437825
R8.62	MAG1272	133.059	483.02	120.755	0	0	0	0.0171	0.0210099	91.67	0.95	R	d__Bacteria	p__Bacteroidota	c__Bacteroidia	Bacteroidales	f__UBA3824	g__UBA3824	s__
R8.68	MAG1273	197.896	211.924	52.981	0	0	0	<.0001	6.30507e-05	61.19	1.17	R	d__Bacteria	p__Firmicutes	c__Bacilli	RFN20	f__CAG-826	g__UBA4951	s__
R8.70	MAG1274	158.752	239.169	59.7923	0	0	0	0.0006	0.000956857	63.54	4.3	R	d__Bacteria	p__Bacteroidota	c__Bacteroidia	Bacteroidales	f__WCHB1-69	g__F23-D06	s__F23-D06 sp902796805
R8.76	MAG1275	219.304	811.279	202.82	7.07585	28.3034	7.07585	0.5025	0.524974	98.66	0.06	R	d__Bacteria	p__Firmicutes_A	c__Clostridia	Lachnospirales	f__Lachnospiraceae	g__CAG-590	s__
R8.79	MAG1276	186.473	258.982	64.7455	0	0	0	0.0006	0.000956857	52.92	8.24	R	d__Bacteria	p__Fibrobacterota	c__Fibrobacteria	Fibrobacterales	f__Fibrobacteraceae	g__Fibrobacter	s__
R8.85	MAG1277	260.6	272.892	68.2229	0	0	0	<.0001	0.000161125	64.68	0	R	d__Bacteria	p__Spirochaetota	c__Spirochaetia	Treponematales	f__Treponemataceae	g__Treponema_D	s__Treponema_D sp002394685
R8.88	MAG1278	614.424	1911.32	477.829	0	0	0	<.0001	2.32495e-05	62.38	1.41	R	d__Bacteria	p__Bacteroidota	c__Bacteroidia	Bacteroidales	f__Muribaculaceae	g__Sodaliphilus	s__
R8.93	MAG1279	203.322	280.138	70.0345	0	0	0	<.0001	2.32495e-05	84.9	1.7	R	d__Bacteria	p__Firmicutes_A	c__Clostridia	Lachnospirales	f__Lachnospiraceae	g__SIG336	s__SIG336 sp015056765
R8.105	MAG1280	192.323	182.4	45.6001	0	0	0	<.0001	2.90589e-06	68.68	1.12	R	d__Bacteria	p__Elusimicrobiota	c__Endomicrobia	Endomicrobiales	f__Endomicrobiaceae	g__RUG658	s__
R8.110	MAG1281	1662.52	3853.61	963.401	0	0	0	<.0001	2.90589e-06	92.1	6.44	R	d__Bacteria	p__Bacteroidota	c__Bacteroidia	Bacteroidales	f__Bacteroidaceae	g__Prevotella	s__
R8.112	MAG1282	580.749	2131	532.749	0	0	0	0.0737	0.0837988	93.57	1.9	R	d__Bacteria	p__Bacteroidota	c__Bacteroidia	Bacteroidales	f__UBA932	g__Cryptobacteroides	s__
R8.114	MAG1283	279.928	1119.71	279.928	104.776	419.106	104.776	0.9642	0.9678	98.43	1.01	R	d__Bacteria	p__Firmicutes_A	c__Clostridia	Oscillospirales	f__Acutalibacteraceae	g__Ruminococcus_E	s__
R8.122	MAG1284	245.017	394.483	98.6206	0	0	0	0.0006	0.000956857	86.93	1.38	R	d__Bacteria	p__Bacteroidota	c__Bacteroidia	Bacteroidales	f__Muribaculaceae	g__RUG14106	s__RUG14106 sp902795825
R8.131	MAG1285	606.246	460.466	115.116	0	0	0	<.0001	1.08446e-06	98.88	3.37	R	d__Bacteria	p__Firmicutes	c__Bacilli	RFN20	f__CAG-826	g__RUG14515	s__
R8.133	MAG1286	3106.48	4792.63	1198.16	0	0	0	<.0001	1.08446e-06	77.13	2.83	R	d__Bacteria	p__Bacteroidota	c__Bacteroidia	Bacteroidales	f__Bacteroidaceae	g__Prevotella	s__Prevotella sp902778535
R8.134	MAG1287	295.518	301.325	75.3312	0	0	0	<.0001	1.08446e-06	93.84	1.98	R	d__Bacteria	p__Bacteroidota	c__Bacteroidia	Bacteroidales	f__UBA932	g__Cryptobacteroides	s__Cryptobacteroides sp902801885
R8.137	MAG1288	230.748	363.166	90.7914	0	0	0	<.0001	1.08446e-06	96.5	1.28	R	d__Bacteria	p__Spirochaetota	c__Spirochaetia	Treponematales	f__Treponemataceae	g__Treponema_D	s__Treponema_D sp002373205
R8.144	MAG1289	541.808	403.948	100.987	0	0	0	<.0001	1.08446e-06	72.05	1.72	R	d__Bacteria	p__Bacteroidota	c__Bacteroidia	Bacteroidales	f__Bacteroidaceae	g__Prevotella	s__Prevotella sp902789415
R8.150	MAG1290	1078.44	4275.39	1068.85	2.82276	11.291	2.82276	0.2511	0.272364	98.66	3.04	R	d__Bacteria	p__Firmicutes_A	c__Clostridia	Oscillospirales	f__Ruminococcaceae	g__Firm-04	s__
R8.225	MAG1291	129.711	224.725	56.1814	0	0	0	0.0035	0.00478424	63.26	4.78	R	d__Bacteria	p__Bacteroidota	c__Bacteroidia	Bacteroidales	f__UBA932	g__Cryptobacteroides	s__Cryptobacteroides sp017469845
R8.226	MAG1292	5256.1	9352.38	2338.09	148.298	593.192	148.298	<.0001	4.51769e-06	77.1	2.25	R	d__Bacteria	p__Bacteroidota	c__Bacteroidia	Bacteroidales	f__Bacteroidaceae	g__Prevotella	s__Prevotella sp002351725
R8.252	MAG1293	1951.24	2273.25	568.313	0	0	0	<.0001	1.08446e-06	82.03	2.04	R	d__Bacteria	p__Bacteroidota	c__Bacteroidia	Bacteroidales	f__P3	g__UBA1711	s__
R8.253	MAG1294	6335.94	5729.48	1432.37	0	0	0	<.0001	1.08446e-06	74.35	2.54	R	d__Bacteria	p__Bacteroidota	c__Bacteroidia	Bacteroidales	f__UBA932	g__Cryptobacteroides	s__Cryptobacteroides sp017429205
R8.257	MAG1295	1490.49	2115.3	528.825	175.553	238.215	59.5538	<.0001	5.29748e-05	92.95	4.77	R	d__Bacteria	p__Firmicutes_A	c__Clostridia	Oscillospirales	f__Oscillospiraceae	g__Limivicinus	s__
R8.260	MAG1296	316.465	1265.86	316.465	8.80381	35.2152	8.80381	0.9642	0.9678	80.36	2.01	R	d__Bacteria	p__Firmicutes_A	c__Clostridia	Oscillospirales	f__Acutalibacteraceae	g__UBA1213	s__
R8.261	MAG1297	707.535	1231.4	307.85	2.52763	10.1105	2.52763	<.0001	4.51769e-06	84.25	6.31	R	d__Bacteria	p__Firmicutes_A	c__Clostridia	Lachnospirales	f__Lachnospiraceae	g__Pseudobutyrivibrio	s__Pseudobutyrivibrio ruminis_D
R8.264	MAG1298	1217.7	541.417	135.354	8.26917	19.4758	4.86895	<.0001	2.40898e-06	51.68	9.75	R	d__Bacteria	p__Firmicutes_C	c__Negativicutes	Acidaminococcales	f__Acidaminococcaceae	g__Succiniclasticum	s__
R8.270	MAG1299	970.619	1177.59	294.398	0	0	0	<.0001	1.08446e-06	67.6	6.36	R	d__Bacteria	p__Spirochaetota	c__Spirochaetia	Treponematales	f__Treponemataceae	g__Treponema_D	s__
R8.275	MAG1300	210.662	800.622	200.156	3.92389	15.6956	3.92389	0.5025	0.524974	96.78	3.62	R	d__Bacteria	p__Firmicutes_A	c__Clostridia	Lachnospirales	f__Lachnospiraceae	g__Acetatifactor	s__
R8.280	MAG1301	412.032	897.732	224.433	0	0	0	0.0015	0.00216609	66.53	2.59	R	d__Bacteria	p__Bacteroidota	c__Bacteroidia	Bacteroidales	f__Bacteroidaceae	g__Prevotella	s__Prevotella sp017445845
R8.281	MAG1302	407.221	1029.28	257.321	2.89708	11.5883	2.89708	<.0001	1.74052e-05	97.28	1.77	R	d__Bacteria	p__Firmicutes_A	c__Clostridia	Lachnospirales	f__Lachnospiraceae	g__XBD2001	s__XBD2001 sp900116395
R8.282	MAG1303	195.589	307.927	76.9818	48.0758	119.537	29.8843	0.2331	0.253436	84.26	1.42	R	d__Bacteria	p__Firmicutes_A	c__Clostridia	Saccharofermentanales	f__Saccharofermentanaceae	g__Firm-16	s__Firm-16 sp017428545
R8.283	MAG1304	849.781	3222.98	805.745	0	0	0	0.0359	0.0419998	96.48	1.4	R	d__Bacteria	p__Firmicutes_A	c__Clostridia	Christensenellales	f__CAG-138	g__UBA3857	s__UBA3857 sp017394835
R8.285	MAG1305	405.305	459.365	114.841	72.1577	66.9584	16.7396	0.0001	0.000239447	97.65	0.34	R	d__Bacteria	p__Firmicutes_A	c__Clostridia	Oscillospirales	f__Oscillospiraceae	g__ER4	s__
R8.286	MAG1306	572.832	1728.88	432.22	0	0	0	0.0079	0.0101688	89.13	0.5	R	d__Bacteria	p__Bacteroidota	c__Bacteroidia	Bacteroidales	f__UBA932	g__Cryptobacteroides	s__Cryptobacteroides sp017445755
R8.288	MAG1307	272.199	499.797	124.949	31.2497	116.176	29.044	0.0218	0.0266938	96.57	0.14	R	d__Bacteria	p__Firmicutes_A	c__Clostridia	Saccharofermentanales	f__Saccharofermentanaceae	g__Saccharofermentans	s__Saccharofermentans sp902782125
R8.292	MAG1308	211.323	149.485	37.3712	0	0	0	<.0001	1.08446e-06	85.85	1.63	R	d__Bacteria	p__Firmicutes_C	c__Negativicutes	Selenomonadales	f__Selenomonadaceae	g__Anaerovibrio	s__Anaerovibrio sp017475925
R8.296	MAG1309	398.841	384.458	96.1146	0	0	0	<.0001	2.90589e-06	85.37	3.54	R	d__Bacteria	p__Bacteroidota	c__Bacteroidia	Bacteroidales	f__Bacteroidaceae	g__UBA4372	s__UBA4372 sp902778625
R8.301	MAG1310	5596.76	9141.65	2285.41	1310.9	2080.38	520.094	0.1415	0.15883	75.27	1.57	R	d__Bacteria	p__Firmicutes_A	c__Clostridia	TANB77	f__CAG-508	g__CAG-793	s__
R8.302	MAG1311	256.405	621.951	155.488	0	0	0	<.0001	8.28023e-06	65.83	1.34	R	d__Bacteria	p__Firmicutes_A	c__Clostridia	Oscillospirales	f__Oscillospiraceae	g__Faecousia	s__Faecousia sp017425545
R8.305	MAG1312	268.325	362.004	90.501	20.7381	57.6634	14.4158	0.0059	0.00787391	62.96	1.71	R	d__Bacteria	p__Patescibacteria	c__Saccharimonadia	Saccharimonadales	f__Nanosyncoccaceae	g__UBA2834	s__
R8.309	MAG1313	290.525	672.671	168.168	10.6603	23.692	5.923	0.2867	0.30981	87.91	1.65	R	d__Bacteria	p__Proteobacteria	c__Alphaproteobacteria	Rs-D84	f__Rs-D84	g__Enterousia	s__
R8.312	MAG1314	538.527	1867.45	466.862	0	0	0	0.0015	0.00216609	98.1	4.05	R	d__Bacteria	p__Bacteroidota	c__Bacteroidia	Bacteroidales	f__UBA3824	g__UBA3824	s__UBA3824 sp002393195
R8.320	MAG1315	2026.67	2138.08	534.519	0	0	0	<.0001	1.08446e-06	94.81	7.25	R	d__Bacteria	p__Bacteroidota	c__Bacteroidia	Bacteroidales	f__Bacteroidaceae	g__Prevotella	s__Prevotella sp017508965
R8.325	MAG1316	190.827	304.539	76.1348	10.1011	40.4045	10.1011	0.0005	0.000788883	89.1	2.98	R	d__Bacteria	p__Firmicutes_A	c__Clostridia	Lachnospirales	f__Lachnospiraceae	g__Butyrivibrio	s__
R8.329	MAG1317	171.8	687.199	171.8	14.9839	59.9357	14.9839	0.9642	0.9678	97.76	0.67	R	d__Bacteria	p__Firmicutes_A	c__Clostridia	Oscillospirales	f__Acutalibacteraceae	g__RUG592	s__
R8.330	MAG1318	358.477	367.734	91.9334	0	0	0	<.0001	2.90589e-06	84.11	8.18	R	d__Bacteria	p__Bacteroidota	c__Bacteroidia	Bacteroidales	f__Bacteroidaceae	g__Prevotella	s__Prevotella sp902786565
R8.332	MAG1319	487.205	537.475	134.369	0	0	0	<.0001	6.30507e-05	100	6.74	R	d__Bacteria	p__Bacteroidota	c__Bacteroidia	Bacteroidales	f__UBA932	g__Cryptobacteroides	s__Cryptobacteroides sp017429885
R8.334	MAG1320	192.317	447.224	111.806	0	0	0	0.0035	0.00478424	95.97	2.01	R	d__Bacteria	p__Firmicutes_A	c__Clostridia	Oscillospirales	f__Ruminococcaceae	g__Ruminococcus_D	s__
R8.335	MAG1321	600.081	919.98	229.995	0	0	0	<.0001	6.30507e-05	90.85	0.65	R	d__Bacteria	p__Firmicutes_A	c__Clostridia	Lachnospirales	f__Lachnospiraceae	g__RUG11977	s__RUG11977 sp017427415
R8.336	MAG1322	345.061	590.943	147.736	1270.86	4136.61	1034.15	0.8777	0.894772	97.52	2.91	Ce	d__Bacteria	p__Firmicutes_A	c__Clostridia	Saccharofermentanales	f__Saccharofermentanaceae	g__Saccharofermentans	s__
R8.338	MAG1323	104.551	418.205	104.551	2.71692	10.8677	2.71692	0.9642	0.9678	85.49	3.36	R	d__Bacteria	p__Firmicutes_A	c__Clostridia	Oscillospirales	f__Acutalibacteraceae	g__RUG762	s__
R8.341	MAG1324	622.923	2491.69	622.923	7.24878	28.9951	7.24878	0.9642	0.9678	93.06	0	R	d__Bacteria	p__Firmicutes_A	c__Clostridia	Oscillospirales	f__Acutalibacteraceae	g__RUG762	s__RUG762 sp902762615
R8.342	MAG1325	639.213	468.396	117.099	0	0	0	<.0001	2.90589e-06	75.62	4.98	R	d__Bacteria	p__Bacteroidota	c__Bacteroidia	Bacteroidales	f__Bacteroidaceae	g__Phocaeicola	s__Phocaeicola sp902779535
R8.343	MAG1326	263.824	398.333	99.5832	0	0	0	<.0001	2.90589e-06	91.04	6.94	R	d__Bacteria	p__Bacteroidota	c__Bacteroidia	Bacteroidales	f__UBA932	g__Cryptobacteroides	s__Cryptobacteroides sp017519865
R8.345	MAG1327	466.582	1468.76	367.19	0	0	0	0.0171	0.0210099	92.74	1.08	R	d__Bacteria	p__Bacteroidota	c__Bacteroidia	Bacteroidales	f__F082	g__Limimorpha	s__
R8.346	MAG1328	593.416	788.838	197.209	125.868	117.787	29.4467	0.0674	0.0780843	93.96	1.34	R	d__Bacteria	p__Firmicutes_A	c__Clostridia	Lachnospirales	f__Lachnospiraceae	g__Eubacterium_Q	s__Eubacterium_Q sp017420535
R8.348	MAG1329	293.245	1172.98	293.245	21.2617	85.0466	21.2617	0.9642	0.9678	98.63	0	R	d__Bacteria	p__Firmicutes_A	c__Clostridia	Oscillospirales	f__Ruminococcaceae	g__Ruminococcus_D	s__
R8.349	MAG1330	598.165	1479.6	369.9	0	0	0	<.0001	2.32495e-05	93.24	0.19	R	d__Bacteria	p__Firmicutes_A	c__Clostridia	Lachnospirales	f__Lachnospiraceae	g__Weimeria	s__Weimeria sp902803645
R8.350	MAG1331	103.235	336.778	84.1945	0	0	0	0.0079	0.0101688	96.54	1.74	R	d__Bacteria	p__Firmicutes_A	c__Clostridia	Lachnospirales	f__Lachnospiraceae	g__NK4A136	s__NK4A136 sp000687675
R8.351	MAG1332	312.991	378.716	94.6789	0	0	0	<.0001	2.32495e-05	88.45	8.4	R	d__Bacteria	p__Bacteroidota	c__Bacteroidia	Bacteroidales	f__Bacteroidaceae	g__Prevotella	s__Prevotella sp900314915
R8.352	MAG1333	742.905	857.674	214.419	0	0	0	<.0001	1.08446e-06	93.89	5.81	R	d__Bacteria	p__Bacteroidota	c__Bacteroidia	Bacteroidales	f__UBA932	g__Cryptobacteroides	s__Cryptobacteroides sp017454905
R8.353	MAG1334	876.622	1133.45	283.362	0	0	0	<.0001	1.08446e-06	91.67	1.43	R	d__Bacteria	p__Bacteroidota	c__Bacteroidia	Bacteroidales	f__UBA932	g__Cryptobacteroides	s__Cryptobacteroides sp017478685
R8.355	MAG1335	738.707	1200.94	300.235	0	0	0	0.0015	0.00216609	93.65	0.48	R	d__Bacteria	p__Bacteroidota	c__Bacteroidia	Bacteroidales	f__UBA932	g__Cryptobacteroides	s__Cryptobacteroides sp900319685
R8.356	MAG1336	1244.27	3155.44	788.86	0	0	0	0.0006	0.000956857	92.04	1.73	R	d__Bacteria	p__Bacteroidota	c__Bacteroidia	Bacteroidales	f__Bacteroidaceae	g__Prevotella	s__Prevotella sp900318685
R8.358	MAG1337	1407.66	3585	896.251	0	0	0	<.0001	8.28023e-06	79.33	1.66	R	d__Bacteria	p__Bacteroidota	c__Bacteroidia	Bacteroidales	f__Bacteroidaceae	g__Prevotella	s__Prevotella sp900316285
R8.360	MAG1338	651.165	352.689	88.1721	0	0	0	<.0001	1.08446e-06	85.53	6.72	R	d__Bacteria	p__Firmicutes_C	c__Negativicutes	Selenomonadales	f__Selenomonadaceae	g__RUG12372	s__
R8.363	MAG1339	272.926	530.986	132.746	0	0	0	0.0035	0.00478424	81.19	1.9	R	d__Bacteria	p__Bacteroidota	c__Bacteroidia	Bacteroidales	f__UBA932	g__Cryptobacteroides	s__
R8.364	MAG1340	272.222	358.45	89.6124	0	0	0	<.0001	0.000161125	53.45	2.59	R	d__Bacteria	p__Bacteroidota	c__Bacteroidia	Bacteroidales	f__Bacteroidaceae	g__UBA4372	s__
R8.366	MAG1341	137.926	430.346	107.586	0	0	0	0.0035	0.00478424	93.94	5.98	R	d__Bacteria	p__Bacteroidota	c__Bacteroidia	Bacteroidales	f__UBA3824	g__UBA3824	s__UBA3824 sp016287995
R8.368	MAG1342	3097.6	5166.2	1291.55	0	0	0	<.0001	1.08446e-06	83.06	3.44	R	d__Bacteria	p__Bacteroidota	c__Bacteroidia	Bacteroidales	f__Bacteroidaceae	g__Prevotella	s__Prevotella sp900318555
R8.370	MAG1343	51.5858	206.343	51.5858	5.02829	20.1132	5.02829	0.9642	0.9678	58.28	0.58	R	d__Bacteria	p__Firmicutes_A	c__Clostridia	Saccharofermentanales	f__Saccharofermentanaceae	g__Saccharofermentans	s__Saccharofermentans sp017552455
R8.378	MAG1344	422.188	1025.07	256.267	0	0	0	0.0079	0.0101688	93.01	1.99	R	d__Bacteria	p__Bacteroidota	c__Bacteroidia	Bacteroidales	f__P3	g__UBA1217	s__UBA1217 sp017429685
R8.380	MAG1345	336.547	481.267	120.317	0	0	0	0.0002	0.000400461	94.48	0.87	R	d__Bacteria	p__Bacteroidota	c__Bacteroidia	Bacteroidales	f__Bacteroidaceae	g__UBA4372	s__UBA4372 sp017429945
R8.383	MAG1346	328.897	739.86	184.965	0	0	0	<.0001	8.28023e-06	95.54	0.39	R	d__Bacteria	p__Bacteroidota	c__Bacteroidia	Bacteroidales	f__Bacteroidaceae	g__Ga6A1	s__Ga6A1 sp900102385
R8.386	MAG1347	413.751	524.403	131.101	0	0	0	<.0001	2.32495e-05	63.88	0.71	R	d__Bacteria	p__Bacteroidota	c__Bacteroidia	Bacteroidales	f__Bacteroidaceae	g__Prevotella	s__
R8.387	MAG1348	123.375	364.615	91.1538	0	0	0	0.1508	0.165656	66.46	1.72	R	d__Bacteria	p__Bacteroidota	c__Bacteroidia	Bacteroidales	f__P3	g__UBA1711	s__UBA1711 sp017501495
R8.390	MAG1349	210.48	517.577	129.394	133.931	368.042	92.0105	0.9211	0.933723	95.13	1.68	R	d__Bacteria	p__Firmicutes_A	c__Clostridia	Oscillospirales	f__Acutalibacteraceae	g__Ruminococcus_E	s__Ruminococcus_E sp902776185
R8.393	MAG1350	1002.98	2451.63	612.909	0	0	0	<.0001	2.90589e-06	74.16	6.05	R	d__Bacteria	p__Bacteroidota	c__Bacteroidia	Bacteroidales	f__Bacteroidaceae	g__Prevotella	s__
R8.395	MAG1351	664.907	1422.57	355.642	0	0	0	<.0001	2.90589e-06	79.32	1.23	R	d__Bacteria	p__Bacteroidota	c__Bacteroidia	Bacteroidales	f__Bacteroidaceae	g__Prevotella	s__
R8.396	MAG1352	263.567	469.277	117.319	0	0	0	0.0015	0.00216609	73.14	4.6	R	d__Bacteria	p__Bacteroidota	c__Bacteroidia	Bacteroidales	f__UBA932	g__Cryptobacteroides	s__Cryptobacteroides sp002393895
R8.398	MAG1353	373.99	739.218	184.805	2.03066	8.12263	2.03066	<.0001	4.51769e-06	93.96	1.13	R	d__Bacteria	p__Firmicutes_A	c__Clostridia	Lachnospirales	f__Lachnospiraceae	g__NK4A144	s__NK4A144 sp003488445
R8.401	MAG1354	446.006	449.472	112.368	8.78643	24.6466	6.16166	<.0001	6.62051e-06	85.35	5.1	R	d__Bacteria	p__Firmicutes_A	c__Clostridia	Lachnospirales	f__Lachnospiraceae	g__UBA2868	s__UBA2868 sp002350465
R8.402	MAG1355	386.003	360.941	90.2352	0	0	0	<.0001	2.90589e-06	55.17	3.45	R	d__Bacteria	p__Bacteroidota	c__Bacteroidia	Bacteroidales	f__Bacteroidaceae	g__UBA2918	s__UBA2918 sp002349865
R8.404	MAG1356	243.261	466.456	116.614	0	0	0	0.0035	0.00478424	95.86	0.54	R	d__Bacteria	p__Bacteroidota	c__Bacteroidia	Bacteroidales	f__WCHB1-69	g__UBA1756	s__UBA1756 sp016288655
R8.405	MAG1357	293.029	752.747	188.187	5.03184	20.1274	5.03184	0.002	0.00279738	60.76	0.5	R	d__Bacteria	p__Firmicutes_A	c__Clostridia	Lachnospirales	f__Lachnospiraceae	g__AC2028	s__AC2028 sp902767075
R8.407	MAG1358	636.348	757.138	189.284	218.906	219.869	54.9672	0.0083	0.0106732	73.98	2.43	R	d__Bacteria	p__Firmicutes_A	c__Clostridia	TANB77	f__CAG-508	g__CAG-269	s__
R8.409	MAG1359	231.63	505.172	126.293	51.1644	184.473	46.1183	0.0055	0.00742441	96.98	2.03	R	d__Bacteria	p__Firmicutes_A	c__Clostridia	Lachnospirales	f__Lachnospiraceae	g__UBA2821	s__
R8.410	MAG1360	273.27	815.248	203.812	0	0	0	0.0006	0.000956857	98.66	4.92	R	d__Bacteria	p__Firmicutes_A	c__Clostridia	Lachnospirales	f__Lachnospiraceae	g__Eubacterium_F	s__Eubacterium_F sp003453515
R8.411	MAG1361	405.081	328.539	82.1348	0	0	0	<.0001	1.08446e-06	76.21	0	R	d__Bacteria	p__Bacteroidota	c__Bacteroidia	Bacteroidales	f__Bacteroidaceae	g__Prevotella	s__Prevotella sp902797505
R8.412	MAG1362	358.591	536.68	134.17	338.205	540.203	135.051	0.9383	0.949947	56.09	0.7	R	d__Bacteria	p__Firmicutes_A	c__Clostridia	TANB77	f__CAG-465	g__RGIG5622	s__
R8.413	MAG1363	252.638	334.215	83.5538	0	0	0	<.0001	2.90589e-06	74.32	3.29	R	d__Bacteria	p__Verrucomicrobiota	c__Lentisphaeria	Victivallales	f__UBA1829	g__UBA1732	s__UBA1732 sp017524965
R8.414	MAG1364	106.224	334.014	83.5034	0	0	0	0.0359	0.0419998	86.76	0.92	R	d__Bacteria	p__Firmicutes_A	c__Clostridia	Oscillospirales	f__Ruminococcaceae	g__Ruminococcus_D	s__
R8.417	MAG1365	541.797	413.348	103.337	0	0	0	<.0001	2.90589e-06	91.75	1.51	R	d__Bacteria	p__Bacteroidota	c__Bacteroidia	Bacteroidales	f__UBA932	g__Cryptobacteroides	s__Cryptobacteroides sp902766985
R8.419	MAG1366	2127.73	1949.93	487.481	0	0	0	<.0001	1.08446e-06	63.53	2.98	R	d__Bacteria	p__Bacteroidota	c__Bacteroidia	Bacteroidales	f__UBA932	g__Cryptobacteroides	s__Cryptobacteroides sp902781705
R8.422	MAG1367	553.258	1347.1	336.775	6.77877	27.1151	6.77877	0.0003	0.000409743	97.13	2.17	R	d__Bacteria	p__Firmicutes_A	c__Clostridia	Lachnospirales	f__Lachnospiraceae	g__AC2028	s__AC2028 sp902790935
R8.423	MAG1368	841.693	754.381	188.595	0	0	0	<.0001	1.08446e-06	96.55	9.4	R	d__Bacteria	p__Bacteroidota	c__Bacteroidia	Bacteroidales	f__UBA932	g__Cryptobacteroides	s__Cryptobacteroides sp900317065
R8.424	MAG1369	994.955	1294.52	323.63	0	0	0	<.0001	2.32495e-05	95.32	0.54	R	d__Bacteria	p__Bacteroidota	c__Bacteroidia	Bacteroidales	f__WCHB1-69	g__F23-D06	s__F23-D06 sp900315705
R8.426	MAG1370	5415.88	10872.7	2718.19	0	0	0	<.0001	1.08446e-06	66.94	1.08	R	d__Bacteria	p__Bacteroidota	c__Bacteroidia	Bacteroidales	f__F082	g__Limimorpha	s__Limimorpha sp001543395
R8.427	MAG1371	2087.57	2019.17	504.792	0	0	0	<.0001	1.08446e-06	67.51	0	R	d__Bacteria	p__Bacteroidota	c__Bacteroidia	Bacteroidales	f__UBA932	g__Cryptobacteroides	s__
R8.428	MAG1372	88.8713	260.841	65.2103	26.4452	60.4429	15.1107	0.6346	0.65578	75.96	3.23	R	d__Bacteria	p__Firmicutes_A	c__Clostridia	Christensenellales	f__CAG-138	g__UBA3792	s__UBA3792 sp017428025
R8.429	MAG1373	275.645	608.139	152.035	0	0	0	<.0001	2.32495e-05	91.67	2.5	R	d__Bacteria	p__Bacteroidota	c__Bacteroidia	Bacteroidales	f__Bacteroidaceae	g__UBA4372	s__UBA4372 sp902799985
R9.26	MAG1374	91.6502	366.601	91.6502	0	0	0	0.3173	0.337339	78.99	1.61	R	d__Bacteria	p__Bacteroidota	c__Bacteroidia	Bacteroidales	f__Paludibacteraceae	g__RF16	s__RF16 sp017480285
R9.30	MAG1375	311.728	292.798	73.1994	24.3699	45.8786	11.4696	<.0001	6.9629e-06	50.43	2.99	R	d__Bacteria	p__Firmicutes_A	c__Clostridia	Christensenellales	f__CAG-74	g__RUG740	s__
R9.37	MAG1376	1499.23	2563.44	640.861	10.1404	40.5615	10.1404	<.0001	1.44132e-05	97.42	3.22	R	d__Bacteria	p__Firmicutes_A	c__Clostridia	Lachnospirales	f__Lachnospiraceae	g__UBA1712	s__UBA1712 sp902789785
R9.39	MAG1377	239.595	699.361	174.84	0	0	0	0.0171	0.0210099	83.11	2.06	R	d__Bacteria	p__Bacteroidota	c__Bacteroidia	Bacteroidales	f__P3	g__UBA1217	s__UBA1217 sp902788805
R9.56	MAG1378	433.671	1054.64	263.659	0	0	0	0.0015	0.00216609	88.58	5.22	R	d__Bacteria	p__Bacteroidota	c__Bacteroidia	Bacteroidales	f__Paludibacteraceae	g__UBA1181	s__UBA1181 sp002310215
R9.72	MAG1379	267.262	332.689	83.1722	0	0	0	<.0001	6.30507e-05	55.49	1.3	R	d__Bacteria	p__Bacteroidota	c__Bacteroidia	Bacteroidales	f__Bacteroidaceae	g__UBA6382	s__UBA6382 sp902788275
R9.76	MAG1380	431.938	877.706	219.427	12.8137	30.5056	7.6264	0.0001	0.000212475	66.76	1.98	R	d__Bacteria	p__Firmicutes_A	c__Clostridia	Oscillospirales	f__Ruminococcaceae	g__Ruminococcus	s__
R9.79	MAG1381	1394.74	2146.98	536.746	0	0	0	<.0001	1.08446e-06	98.77	2.81	R	d__Bacteria	p__Bacteroidota	c__Bacteroidia	Bacteroidales	f__Bacteroidaceae	g__Prevotella	s__Prevotella sp002449845
R9.82	MAG1382	333.519	259.693	64.9232	0	0	0	<.0001	1.08446e-06	97.76	4.39	R	d__Bacteria	p__Firmicutes_C	c__Negativicutes	Selenomonadales	f__Selenomonadaceae	g__Anaerovibrio	s__Anaerovibrio sp017475925
R9.93	MAG1383	979.514	1935.96	483.99	0	0	0	<.0001	2.32495e-05	94.92	4.6	R	d__Bacteria	p__Bacteroidota	c__Bacteroidia	Bacteroidales	f__Bacteroidaceae	g__UBA4293	s__UBA4293 sp002395835
R9.100	MAG1384	189.385	724.197	181.049	405.426	1555.97	388.992	0.9779	0.979589	97.76	1.17	Ce	d__Bacteria	p__Firmicutes_A	c__Clostridia	Oscillospirales	f__Acutalibacteraceae	g__Ruminococcus_E	s__
R9.257	MAG1385	1380.74	2498.57	624.643	0	0	0	<.0001	1.08446e-06	83.17	7.62	R	d__Bacteria	p__Bacteroidota	c__Bacteroidia	Bacteroidales	f__UBA932	g__Cryptobacteroides	s__Cryptobacteroides sp900318565
R9.284	MAG1386	1247.39	3249.33	812.332	14.5044	58.0176	14.5044	0.1211	0.136287	90.24	2.91	R	d__Bacteria	p__Bacteroidota	c__Bacteroidia	Bacteroidales	f__Bacteroidaceae	g__UBA1179	s__UBA1179 sp902763885
R9.286	MAG1387	2355.62	3779.33	944.834	356.904	1017.62	254.405	0.0004	0.00064203	93.82	6.18	R	d__Bacteria	p__Firmicutes	c__Bacilli	RF39	f__UBA660	g__RUG13038	s__
R9.303	MAG1388	888.689	1362.06	340.514	0	0	0	<.0001	1.08446e-06	98.88	3.26	R	d__Bacteria	p__Firmicutes	c__Bacilli	RFN20	f__CAG-826	g__RUG14515	s__
R9.306	MAG1389	614.746	1505.88	376.471	0	0	0	<.0001	0.000161125	83.54	6.63	R	d__Bacteria	p__Bacteroidota	c__Bacteroidia	Bacteroidales	f__Bacteroidaceae	g__UBA4372	s__
R9.320	MAG1390	284.155	425.991	106.498	0	0	0	<.0001	2.90589e-06	81.32	0	R	d__Bacteria	p__Firmicutes_A	c__Clostridia	Lachnospirales	f__Lachnospiraceae	g__SIG280	s__
R9.323	MAG1391	566.661	1723.64	430.909	489.287	1710.13	427.532	0.4034	0.424496	78.52	1.74	Ce	d__Bacteria	p__Firmicutes_A	c__Clostridia	Oscillospirales	f__Acutalibacteraceae	g__Ruminococcus_E	s__
R9.326	MAG1392	289.706	443.975	110.994	236.203	378.337	94.5843	1	1	79.11	0	R	d__Bacteria	p__Firmicutes_A	c__Clostridia	Oscillospirales	f__Acutalibacteraceae	g__Ruminococcus_E	s__Ruminococcus_E sp900316555
R9.329	MAG1393	633.251	346.219	86.5549	167.388	134.357	33.5892	<.0001	0.000147575	80.96	3.62	R	d__Bacteria	p__Firmicutes_A	c__Clostridia	Peptostreptococcales	f__Anaerovoracaceae	g__RUG754	s__RUG754 sp902780845
R9.332	MAG1394	3586.42	4640.73	1160.18	0	0	0	<.0001	1.08446e-06	61.43	9.07	R	d__Bacteria	p__Bacteroidota	c__Bacteroidia	Bacteroidales	f__Bacteroidaceae	g__Prevotella	s__Prevotella sp902798285
R9.342	MAG1395	332.044	1126.35	281.587	71.7754	155.577	38.8942	0.5585	0.58014	82.94	0	R	d__Bacteria	p__Patescibacteria	c__Saccharimonadia	Saccharimonadales	f__Nanosyncoccaceae	g__Nanosyncoccus	s__
R9.351	MAG1396	1210.04	2909.37	727.342	0	0	0	<.0001	8.28023e-06	98.24	1.79	R	d__Bacteria	p__Bacteroidota	c__Bacteroidia	Bacteroidales	f__Bacteroidaceae	g__Prevotella	s__Prevotella sp900318685
R9.357	MAG1397	2737.83	2569.56	642.389	0	0	0	<.0001	8.28023e-06	96.19	0.55	R	d__Bacteria	p__Fibrobacterota	c__Fibrobacteria	Fibrobacterales	f__Fibrobacteraceae	g__Fibrobacter	s__Fibrobacter succinogenes_J
R9.359	MAG1398	332.331	598.445	149.611	1.9909	7.96361	1.9909	<.0001	1.48978e-06	98.6	0	R	d__Bacteria	p__Spirochaetota	c__Spirochaetia	Treponematales	f__Treponemataceae	g__Treponema_D	s__Treponema_D sp002373205
R9.361	MAG1399	364.163	354.785	88.6963	9.80884	27.1084	6.77709	<.0001	1.93055e-06	80.14	6.52	R	d__Bacteria	p__Firmicutes_A	c__Clostridia	Christensenellales	f__CAG-74	g__SFMI01	s__
R9.363	MAG1400	1134.26	813.752	203.438	0	0	0	<.0001	1.08446e-06	66.38	5.5	R	d__Bacteria	p__Bacteroidota	c__Bacteroidia	Bacteroidales	f__Bacteroidaceae	g__Prevotella	s__Prevotella sp900316985
R9.365	MAG1401	674.892	1048.96	262.239	512.308	843.242	210.81	0.3262	0.346365	97.54	6.8	R	d__Archaea	p__Methanobacteriota	c__Methanobacteria	Methanobacteriales	f__Methanobacteriaceae	g__Methanobrevibacter_A	s__Methanobrevibacter_A sp900314615
R9.369	MAG1402	594.409	1014.93	253.732	0	0	0	<.0001	1.08446e-06	94.29	3.33	R	d__Bacteria	p__Bacteroidota	c__Bacteroidia	Bacteroidales	f__UBA932	g__Bact-11	s__Bact-11 sp902789445
R9.370	MAG1403	471.98	1058.72	264.68	0	0	0	0.0015	0.00216609	97.13	1.42	R	d__Bacteria	p__Bacteroidota	c__Bacteroidia	Bacteroidales	f__Bacteroidaceae	g__Prevotella	s__Prevotella sp900318625
R9.374	MAG1404	345.92	1344.63	336.157	0	0	0	0.1508	0.165656	84.04	0.93	R	d__Bacteria	p__Bacteroidota	c__Bacteroidia	Bacteroidales	f__Bacteroidaceae	g__Prevotella	s__Prevotella sp002353975
R9.376	MAG1405	552.783	1003.12	250.779	0	0	0	<.0001	2.90589e-06	88.93	7.11	R	d__Bacteria	p__Bacteroidota	c__Bacteroidia	Bacteroidales	f__Bacteroidaceae	g__UBA4372	s__UBA4372 sp902778625
R9.379	MAG1406	887.656	1294.39	323.597	0	0	0	<.0001	0.000161125	89.23	1.34	R	d__Bacteria	p__Bacteroidota	c__Bacteroidia	Bacteroidales	f__P3	g__UBA1217	s__UBA1217 sp017446745
R9.384	MAG1407	243.01	474.371	118.593	4.73688	18.9475	4.73688	<.0001	8.38658e-05	84.21	2.96	R	d__Bacteria	p__Firmicutes_A	c__Clostridia	Lachnospirales	f__Lachnospiraceae	g__UBA2868	s__
R9.388	MAG1408	734.26	1086.66	271.664	0	0	0	<.0001	2.90589e-06	76.8	0.93	R	d__Bacteria	p__Bacteroidota	c__Bacteroidia	Bacteroidales	f__Bacteroidaceae	g__Prevotella	s__Prevotella sp002363695
R9.389	MAG1409	1601.81	3409.37	852.342	0	0	0	<.0001	0.000161125	92.54	1.85	R	d__Bacteria	p__Bacteroidota	c__Bacteroidia	Bacteroidales	f__UBA932	g__Cryptobacteroides	s__Cryptobacteroides sp002393945
R9.391	MAG1410	760.354	1294.18	323.545	0	0	0	<.0001	2.32495e-05	96.43	1.6	R	d__Bacteria	p__Bacteroidota	c__Bacteroidia	Bacteroidales	f__UBA932	g__RUG11257	s__RUG11257 sp017428035
R9.392	MAG1411	1030.66	1339.05	334.763	0	0	0	<.0001	1.08446e-06	83.41	6.43	R	d__Bacteria	p__Bacteroidota	c__Bacteroidia	Bacteroidales	f__UBA932	g__Cryptobacteroides	s__Cryptobacteroides sp017478685
R9.393	MAG1412	1931.11	2361.61	590.402	0	0	0	<.0001	1.08446e-06	82.8	3.41	R	d__Bacteria	p__Bacteroidota	c__Bacteroidia	Bacteroidales	f__P3	g__UBA1711	s__
R9.394	MAG1413	261.833	315.672	78.9181	0	0	0	<.0001	1.08446e-06	67.47	6.05	R	d__Bacteria	p__Bacteroidota	c__Bacteroidia	Bacteroidales	f__Bacteroidaceae	g__Prevotella	s__Prevotella sp902797505
R9.396	MAG1414	153.387	380.794	95.1985	11.6427	46.5707	11.6427	0.0186	0.022784	87.56	5.85	R	d__Bacteria	p__Firmicutes_A	c__Clostridia	Saccharofermentanales	f__Saccharofermentanaceae	g__Saccharofermentans	s__Saccharofermentans sp902782125
R9.399	MAG1415	1624.55	2131.49	532.872	0	0	0	<.0001	2.90589e-06	64.8	4.32	R	d__Bacteria	p__Bacteroidota	c__Bacteroidia	Bacteroidales	f__Bacteroidaceae	g__Prevotella	s__Prevotella sp017508965
R9.400	MAG1416	363.396	619.529	154.882	0	0	0	<.0001	2.32495e-05	80.38	0.65	R	d__Bacteria	p__Bacteroidota	c__Bacteroidia	Bacteroidales	f__Paludibacteraceae	g__RF16	s__
R9.401	MAG1417	172.891	574.66	143.665	60.8909	204.946	51.2364	0.1653	0.181188	91.61	3.27	R	d__Bacteria	p__Firmicutes_A	c__Clostridia	Oscillospirales	f__Acutalibacteraceae	g__Ruminococcus_E	s__Ruminococcus_E sp003499325
R9.403	MAG1418	700.382	747.311	186.828	33.123	49.1439	12.286	<.0001	6.29655e-06	50	0.29	R	d__Bacteria	p__Firmicutes_A	c__Clostridia	Christensenellales	f__CAG-74	g__GCA-900199385	s__
R9.405	MAG1419	418.222	296.75	74.1874	0	0	0	<.0001	1.08446e-06	69.34	2.53	R	d__Bacteria	p__Firmicutes_A	c__Clostridia	Lachnospirales	f__Lachnospiraceae	g__UBA3633	s__
R9.407	MAG1420	326.644	741.605	185.401	0	0	0	0.0171	0.0210099	72.93	4.31	R	d__Bacteria	p__Bacteroidota	c__Bacteroidia	Bacteroidales	f__Bacteroidaceae	g__Prevotella	s__Prevotella sp902774815
R9.408	MAG1421	2214.04	3717.92	929.481	356.801	691.273	172.818	0.0222	0.0271029	82.58	2.25	R	d__Bacteria	p__Firmicutes	c__Bacilli	RF39	f__UBA660	g__UBA6985	s__
R9.409	MAG1422	1291.73	5166.93	1291.73	4.34253	17.3701	4.34253	0.9642	0.9678	98.88	1.12	R	d__Bacteria	p__Firmicutes	c__Bacilli	RFN20	f__CAG-826	g__UBA3207	s__UBA3207 sp017447725
R9.412	MAG1423	925.247	558.963	139.741	0	0	0	<.0001	1.08446e-06	74.61	7.49	R	d__Bacteria	p__Bacteroidota	c__Bacteroidia	Bacteroidales	f__UBA932	g__Cryptobacteroides	s__
R9.413	MAG1424	1118.71	628.186	157.046	470.654	464.145	116.036	0.0026	0.00364346	55.46	4.58	R	d__Bacteria	p__Firmicutes_A	c__Clostridia	TANB77	f__CAG-508	g__CAG-269	s__
R9.416	MAG1425	780.868	1501.56	375.39	0	0	0	0.0006	0.000956857	88.14	2.26	R	d__Bacteria	p__Bacteroidota	c__Bacteroidia	Bacteroidales	f__Muribaculaceae	g__Sodaliphilus	s__
R9.425	MAG1426	1291.02	1469.06	367.264	3.05464	12.2186	3.05464	<.0001	1.48978e-06	62.73	3.64	R	d__Bacteria	p__Spirochaetota	c__Spirochaetia	Treponematales	f__Treponemataceae	g__Treponema_D	s__
R9.426	MAG1427	4043.11	5991.05	1497.76	0	0	0	<.0001	1.08446e-06	75.99	0.94	R	d__Bacteria	p__Bacteroidota	c__Bacteroidia	Bacteroidales	f__Bacteroidaceae	g__Prevotella	s__Prevotella sp900319715
R9.427	MAG1428	1092.06	1547.91	386.978	357.004	789.171	197.293	0.0257	0.0311175	55.06	2.25	R	d__Bacteria	p__Firmicutes	c__Bacilli	RF39	f__UBA660	g__CAG-417	s__
R9.428	MAG1429	544.519	551.587	137.897	0	0	0	<.0001	1.08446e-06	68.4	6.87	R	d__Bacteria	p__Bacteroidota	c__Bacteroidia	Bacteroidales	f__Bacteroidaceae	g__Prevotella	s__Prevotella sp002350805
R9.429	MAG1430	729.396	442.916	110.729	0	0	0	<.0001	1.08446e-06	88.89	0.24	R	d__Bacteria	p__Bacteroidota	c__Bacteroidia	Bacteroidales	f__UBA932	g__Cryptobacteroides	s__Cryptobacteroides sp900321245
R9.430	MAG1431	305.959	332.173	83.0433	0	0	0	<.0001	2.32495e-05	79.05	3.62	R	d__Bacteria	p__Firmicutes_A	c__Clostridia	Lachnospirales	f__Lachnospiraceae	g__UBA1258	s__
R9.432	MAG1432	733.571	794.155	198.539	0	0	0	<.0001	1.08446e-06	50.3	1.11	R	d__Bacteria	p__Bacteroidota	c__Bacteroidia	Bacteroidales	f__UBA932	g__Cryptobacteroides	s__Cryptobacteroides sp902794615
R9.433	MAG1433	389.428	795.045	198.761	14.9935	32.4307	8.10768	<.0001	9.49463e-06	92.62	1.01	R	d__Bacteria	p__Firmicutes_A	c__Clostridia	Oscillospirales	f__Oscillospiraceae	g__ER4	s__
R9.436	MAG1434	2244.32	5789.3	1447.32	1046.56	3537.31	884.327	0.0006	0.000956857	88.09	3.09	R	d__Bacteria	p__Firmicutes_A	c__Clostridia	TANB77	f__CAG-508	g__Scatovivens	s__
R9.439	MAG1435	1901.5	2998.29	749.573	982.078	2082.98	520.746	0.1223	0.137573	64.78	6.74	R	d__Bacteria	p__Firmicutes_A	c__Clostridia	TANB77	f__CAG-508	g__CAG-269	s__
R9.446	MAG1436	638.574	502.554	125.638	0	0	0	<.0001	1.08446e-06	86.73	2.97	R	d__Bacteria	p__Bacteroidota	c__Bacteroidia	Bacteroidales	f__UBA932	g__Cryptobacteroides	s__Cryptobacteroides sp017454905
R10.3	MAG1437	164.713	334.408	83.602	3.29167	9.02128	2.25532	0.0597	0.06937	94.76	1.01	R	d__Bacteria	p__Firmicutes_A	c__Clostridia	Oscillospirales	f__Ruminococcaceae	g__Firm-04	s__Firm-04 sp017427265
R10.4	MAG1438	142.325	355.351	88.8378	0	0	0	0.0359	0.0419998	86.97	0.7	R	d__Bacteria	p__Spirochaetota	c__Spirochaetia	Treponematales	f__Treponemataceae	g__Treponema_D	s__Treponema_D sp002393865
R10.6	MAG1439	182.348	235.244	58.8109	0	0	0	<.0001	8.28023e-06	81.95	2.96	R	d__Bacteria	p__Desulfobacterota_I	c__Desulfovibrionia	Desulfovibrionales	f__Desulfovibrionaceae	g__Desulfovibrio	s__
R10.17	MAG1440	403.379	670.92	167.73	0	0	0	<.0001	2.90589e-06	99.65	2.8	R	d__Bacteria	p__Spirochaetota	c__Spirochaetia	Treponematales	f__Treponemataceae	g__UBA1240	s__UBA1240 sp001603145
R10.26	MAG1441	678.207	1714.06	428.515	22.3346	78.4476	19.6119	0.0003	0.000490157	99.16	0.28	R	d__Bacteria	p__Firmicutes_A	c__Clostridia	Lachnospirales	f__Lachnospiraceae	g__Butyrivibrio	s__Butyrivibrio fibrisolvens_C
R10.46	MAG1442	312.627	337.405	84.3511	0	0	0	<.0001	8.28023e-06	72.88	3.81	R	d__Bacteria	p__Firmicutes_A	c__Clostridia	Oscillospirales	f__CAG-272	g__UMGS1696	s__
R10.58	MAG1443	322.3	602.518	150.63	15.0966	24.3675	6.09186	0.0008	0.00127265	99.98	0	R	d__Bacteria	p__Spirochaetota	c__Spirochaetia	Treponematales	f__Treponemataceae	g__Treponema_D	s__Treponema_D saccharophilum
R10.71	MAG1444	371.394	683.427	170.857	1.52021	6.08082	1.52021	0.0044	0.00586857	96.57	0.77	R	d__Bacteria	p__Firmicutes_A	c__Clostridia	Lachnospirales	f__Lachnospiraceae	g__UBA1712	s__
R10.74	MAG1445	1296.15	1523.66	380.916	0	0	0	<.0001	8.28023e-06	97.9	0.7	R	d__Bacteria	p__Spirochaetota	c__Spirochaetia	Treponematales	f__Treponemataceae	g__Treponema_D	s__Treponema_D sp002394685
R10.82	MAG1446	230.613	479.611	119.903	0	0	0	0.0002	0.000400461	90.96	2.25	R	d__Bacteria	p__Bacteroidota	c__Bacteroidia	Bacteroidales	f__Bacteroidaceae	g__UBA3839	s__UBA3839 sp900314125
R10.94	MAG1447	50.86	203.44	50.86	0	0	0	0.3173	0.337339	76.67	2.3	R	d__Bacteria	p__Bacteroidota	c__Bacteroidia	Bacteroidales	f__UBA1715	g__UBA1715	s__UBA1715 sp002371705
R10.98	MAG1448	267.591	234.976	58.7441	213.735	184.981	46.2452	0.651	0.671166	88.19	8.32	R	d__Bacteria	p__Firmicutes_A	c__Clostridia	Oscillospirales	f__Acutalibacteraceae	g__Ruminococcus_E	s__Ruminococcus_E sp900316555
R10.99	MAG1449	306.809	493.162	123.29	11.8948	22.5554	5.63885	0.0375	0.0439021	60.63	5.15	R	d__Bacteria	p__Firmicutes_A	c__Clostridia	Oscillospirales	f__Acutalibacteraceae	g__RGIG9287	s__
R10.101	MAG1450	331.926	548.032	137.008	17.1853	32.8027	8.20067	<.0001	6.81115e-05	88.47	3.07	R	d__Bacteria	p__Verrucomicrobiota	c__Kiritimatiellae	RFP12	f__UBA1067	g__RUG572	s__
R10.121	MAG1451	294.798	234.636	58.659	0	0	0	<.0001	1.08446e-06	57.23	7.8	R	d__Bacteria	p__Bacteroidota	c__Bacteroidia	Bacteroidales	f__UBA932	g__Cryptobacteroides	s__Cryptobacteroides sp902801885
R10.127	MAG1452	63.5284	254.114	63.5284	0	0	0	0.3173	0.337339	84.56	4.86	R	d__Bacteria	p__Firmicutes_A	c__Clostridia	Lachnospirales	f__Lachnospiraceae	g__UBA1258	s__
R10.132	MAG1453	543.082	673.102	168.275	98.4822	44.9303	11.2326	<.0001	9.03827e-06	92.62	2.71	R	d__Bacteria	p__Firmicutes_A	c__Clostridia	Oscillospirales	f__Oscillospiraceae	g__UBA738	s__
R10.137	MAG1454	261.059	429.403	107.351	0	0	0	0.0006	0.000956857	87.53	4.26	R	d__Bacteria	p__Firmicutes_A	c__Clostridia	Lachnospirales	f__Lachnospiraceae	g__AC2028	s__AC2028 sp018056425
R10.138	MAG1455	3200.78	5519.74	1379.93	0	0	0	<.0001	1.08446e-06	84.52	2.82	R	d__Bacteria	p__Bacteroidota	c__Bacteroidia	Bacteroidales	f__F082	g__Limimorpha	s__
R10.141	MAG1456	699.517	441.785	110.446	0	0	0	<.0001	1.08446e-06	97.1	9.8	R	d__Bacteria	p__Bacteroidota	c__Bacteroidia	Bacteroidales	f__UBA932	g__Cryptobacteroides	s__Cryptobacteroides sp902780935
R10.184	MAG1457	5054.26	4670.08	1167.52	0	0	0	<.0001	1.08446e-06	84.33	3.43	R	d__Bacteria	p__Bacteroidota	c__Bacteroidia	Bacteroidales	f__UBA932	g__Cryptobacteroides	s__
R10.220	MAG1458	2027.72	2904.1	726.024	2.91615	11.6646	2.91615	<.0001	1.48978e-06	69.39	4.92	R	d__Bacteria	p__Spirochaetota	c__Spirochaetia	Treponematales	f__Treponemataceae	g__Treponema_D	s__Treponema_D sp016293915
R10.287	MAG1459	237.058	405.37	101.343	0	0	0	0.0015	0.00216609	65.26	4.01	R	d__Bacteria	p__Bacteroidota	c__Bacteroidia	Bacteroidales	f__SZUA-534	g__RUG13583	s__
R10.310	MAG1460	621.598	2163.21	540.804	51.2554	125.302	31.3256	0.0751	0.0853203	97.99	1.34	R	d__Bacteria	p__Firmicutes_A	c__Clostridia	Oscillospirales	f__Acutalibacteraceae	g__Ruminococcus_E	s__
R10.315	MAG1461	611.234	1744.9	436.224	34.4294	79.0311	19.7578	0.0307	0.0370888	87.57	1.09	R	d__Bacteria	p__Firmicutes_A	c__Clostridia	Saccharofermentanales	f__Saccharofermentanaceae	g__Saccharofermentans	s__Saccharofermentans sp017940895
R10.320	MAG1462	4656.2	6665.58	1666.4	0	0	0	<.0001	1.08446e-06	68.95	1.17	R	d__Bacteria	p__Bacteroidota	c__Bacteroidia	Bacteroidales	f__F082	g__Limimorpha	s__Limimorpha sp902799345
R10.324	MAG1463	1103.35	1983.4	495.85	0	0	0	<.0001	2.90589e-06	93.22	1.26	R	d__Bacteria	p__Firmicutes_A	c__Clostridia	Lachnospirales	f__Lachnospiraceae	g__RUG11977	s__RUG11977 sp016287095
R10.335	MAG1464	424.628	744.241	186.06	0	0	0	<.0001	1.08446e-06	98.6	0.7	R	d__Bacteria	p__Spirochaetota	c__Spirochaetia	Treponematales	f__Treponemataceae	g__Treponema_D	s__Treponema_D sp002373205
R10.339	MAG1465	349.733	482.78	120.695	0	0	0	<.0001	8.28023e-06	90.91	0.37	R	d__Bacteria	p__Bacteroidota	c__Bacteroidia	Bacteroidales	f__Bacteroidaceae	g__UBA6382	s__UBA6382 sp902788275
R10.340	MAG1466	467.946	847.992	211.998	0	0	0	<.0001	2.32495e-05	76.13	0.74	R	d__Bacteria	p__Bacteroidota	c__Bacteroidia	Bacteroidales	f__Bacteroidaceae	g__UBA4293	s__UBA4293 sp002395835
R10.343	MAG1467	338.023	708.239	177.06	6.79926	18.5801	4.64503	0.0067	0.00888449	97.99	0	R	d__Bacteria	p__Firmicutes_A	c__Clostridia	Saccharofermentanales	f__Saccharofermentanaceae	g__Saccharofermentans	s__Saccharofermentans sp902782125
R10.344	MAG1468	213.384	223.315	55.8287	0	0	0	<.0001	1.08446e-06	55.49	3.73	R	d__Bacteria	p__Spirochaetota	c__Spirochaetia	Treponematales	f__Treponemataceae	g__Treponema_D	s__Treponema_D sp902785455
R10.347	MAG1469	493.226	1211.89	302.972	0	0	0	<.0001	2.32495e-05	87.62	8.6	R	d__Bacteria	p__Bacteroidota	c__Bacteroidia	Bacteroidales	f__UBA932	g__RUG11257	s__RUG11257 sp017428035
R10.348	MAG1470	195.716	265.66	66.415	0	0	0	<.0001	2.32495e-05	89.06	9.94	R	d__Bacteria	p__Bacteroidota	c__Bacteroidia	Bacteroidales	f__UBA932	g__Egerieousia	s__Egerieousia sp002309115
R10.349	MAG1471	849.277	1209.33	302.332	0	0	0	<.0001	1.08446e-06	75.63	1.83	R	d__Bacteria	p__Bacteroidota	c__Bacteroidia	Bacteroidales	f__UBA932	g__Cryptobacteroides	s__
R10.350	MAG1472	1682.77	3127.97	781.994	0	0	0	<.0001	8.28023e-06	76.37	0.84	R	d__Bacteria	p__Firmicutes_A	c__Clostridia	Lachnospirales	f__Lachnospiraceae	g__UBA3633	s__
R10.351	MAG1473	199.799	171.721	42.9302	0	0	0	<.0001	2.90589e-06	66.32	0	R	d__Bacteria	p__Firmicutes_A	c__Clostridia	Lachnospirales	f__Lachnospiraceae	g__SIG280	s__
R10.353	MAG1474	94.7336	252.154	63.0386	2.1886	8.7544	2.1886	0.0563	0.0654699	80.04	3.57	R	d__Bacteria	p__Firmicutes_A	c__Clostridia	Lachnospirales	f__Lachnospiraceae	g__Eubacterium_Q	s__Eubacterium_Q sp002349225
R10.355	MAG1475	710.872	1383.62	345.904	0	0	0	<.0001	0.000161125	65.73	0	R	d__Bacteria	p__Spirochaetota	c__Spirochaetia	Treponematales	f__Treponemataceae	g__Treponema_D	s__
R10.356	MAG1476	118.535	182.117	45.5293	7.73988	21.7706	5.44265	0.0133	0.0168961	89.15	2.85	R	d__Bacteria	p__Firmicutes_A	c__Clostridia	Oscillospirales	f__Acutalibacteraceae	g__Fimenecus	s__Fimenecus sp900315985
R10.359	MAG1477	347.615	203.844	50.961	0	0	0	<.0001	1.08446e-06	68.97	1.9	R	d__Bacteria	p__Bacteroidota	c__Bacteroidia	Bacteroidales	f__UBA932	g__Cryptobacteroides	s__Cryptobacteroides sp900317925
R10.360	MAG1478	328.963	302.514	75.6285	31.5837	45.1811	11.2953	0.0001	0.000247594	89.7	1.67	R	d__Bacteria	p__Firmicutes_A	c__Clostridia	Lachnospirales	f__Lachnospiraceae	g__Eubacterium_G	s__Eubacterium_G sp002369135
R10.362	MAG1479	162.197	144.007	36.0018	88.4636	107.243	26.8108	0.0059	0.00791056	50.6	2.41	R	d__Bacteria	p__Actinobacteriota	c__Coriobacteriia	Coriobacteriales	f__Atopobiaceae	g__RUG721	s__RUG721 sp900321745
R10.363	MAG1480	188.503	387.839	96.9598	5.7208	12.5026	3.12564	0.2442	0.265245	63.39	0.85	R	d__Bacteria	p__Patescibacteria	c__Saccharimonadia	Saccharimonadales	f__Nanosyncoccaceae	g__UBA2834	s__UBA2834 sp016290315
R10.371	MAG1481	940.38	654.42	163.605	0	0	0	<.0001	1.08446e-06	94.7	5.55	R	d__Bacteria	p__Firmicutes_A	c__Clostridia	Lachnospirales	f__Lachnospiraceae	g__Butyrivibrio	s__
R10.373	MAG1482	344.334	734.327	183.582	91.0175	123.075	30.7689	0.0065	0.00865978	94.54	2.93	R	d__Bacteria	p__Firmicutes_A	c__Clostridia	Lachnospirales	f__Lachnospiraceae	g__CAG-791	s__CAG-791 sp902801585
R10.376	MAG1483	1276.71	3969.68	992.421	0	0	0	0.0079	0.0101688	97.31	0	R	d__Bacteria	p__Bacteroidota	c__Bacteroidia	Bacteroidales	f__Paludibacteraceae	g__UBA1181	s__UBA1181 sp902784425
R10.382	MAG1484	373.359	388.508	97.1271	140.776	60.3858	15.0965	0.0083	0.0106862	96.1	4.37	R	d__Bacteria	p__Firmicutes_A	c__Clostridia	Christensenellales	f__CAG-74	g__UBA2862	s__UBA2862 sp902800625
R10.383	MAG1485	226.007	398.636	99.6591	0	0	0	<.0001	2.90589e-06	96.27	0.93	R	d__Bacteria	p__Spirochaetota	c__Spirochaetia	Treponematales	f__Treponemataceae	g__Treponema_D	s__
R10.384	MAG1486	373.711	393.325	98.3313	0	0	0	<.0001	2.32495e-05	82.48	3.16	R	d__Bacteria	p__Bacteroidota	c__Bacteroidia	Bacteroidales	f__Bacteroidaceae	g__Prevotella	s__Prevotella sp900317305
R10.386	MAG1487	580.153	700.874	175.218	0	0	0	<.0001	0.000161125	92.81	2.6	R	d__Bacteria	p__Bacteroidota	c__Bacteroidia	Bacteroidales	f__Bacteroidaceae	g__UBA4372	s__UBA4372 sp902779315
R10.388	MAG1488	424.944	432.098	108.024	0	0	0	<.0001	8.28023e-06	78.53	1.24	R	d__Bacteria	p__Bacteroidota	c__Bacteroidia	Bacteroidales	f__Bacteroidaceae	g__UBA4372	s__
R10.391	MAG1489	1693.42	3137.53	784.382	0	0	0	<.0001	0.000161125	94.78	1.08	R	d__Bacteria	p__Bacteroidota	c__Bacteroidia	Bacteroidales	f__WCHB1-69	g__F23-D06	s__F23-D06 sp900315705
R10.392	MAG1490	636.536	1001.72	250.431	73.3743	143.215	35.8037	0.0031	0.00431542	81.59	1.68	R	d__Bacteria	p__Firmicutes_A	c__Clostridia	Christensenellales	f__CAG-74	g__GCA-900199385	s__GCA-900199385 sp900320755
R10.396	MAG1491	611.918	811.784	202.946	0	0	0	<.0001	0.000161125	90.59	1.08	R	d__Bacteria	p__Bacteroidota	c__Bacteroidia	Bacteroidales	f__P3	g__UBA1217	s__UBA1217 sp017446745
R10.397	MAG1492	516.595	603.787	150.947	0	0	0	<.0001	1.08446e-06	99.43	0.44	R	d__Bacteria	p__Firmicutes_A	c__Clostridia	Lachnospirales	f__Lachnospiraceae	g__Pseudobutyrivibrio	s__Pseudobutyrivibrio sp900112855
R10.399	MAG1493	1147.87	2736.07	684.017	0	0	0	<.0001	2.90589e-06	71.51	2.04	R	d__Bacteria	p__Bacteroidota	c__Bacteroidia	Bacteroidales	f__Bacteroidaceae	g__Prevotella	s__Prevotella sp902771785
R10.401	MAG1494	266.382	189.218	47.3045	0	0	0	<.0001	1.08446e-06	77.85	9.82	R	d__Bacteria	p__Firmicutes_A	c__Clostridia	Lachnospirales	f__Lachnospiraceae	g__NK4A144	s__NK4A144 sp902782655
R10.402	MAG1495	252.239	684.338	171.085	0	0	0	0.0171	0.0210099	94.69	0.74	R	d__Bacteria	p__Bacteroidota	c__Bacteroidia	Bacteroidales	f__Bacteroidaceae	g__Prevotella	s__
R10.403	MAG1496	156.561	279.611	69.9026	78.7568	102.607	25.6518	0.6227	0.644816	86.85	5.83	R	d__Bacteria	p__Firmicutes_A	c__Clostridia	Lachnospirales	f__Lachnospiraceae	g__CAG-791	s__CAG-791 sp902789735
R10.406	MAG1497	624.78	1657.88	414.469	0	0	0	0.0015	0.00216609	90.71	0.79	R	d__Bacteria	p__Bacteroidota	c__Bacteroidia	Bacteroidales	f__UBA932	g__Bact-11	s__
R10.409	MAG1498	460.798	698.014	174.503	0	0	0	<.0001	2.32495e-05	83.69	1.75	R	d__Bacteria	p__Bacteroidota	c__Bacteroidia	Bacteroidales	f__UBA932	g__Cryptobacteroides	s__Cryptobacteroides sp017429885
R10.413	MAG1499	3584.7	6048.91	1512.23	0	0	0	<.0001	1.08446e-06	82.45	7.22	R	d__Bacteria	p__Bacteroidota	c__Bacteroidia	Bacteroidales	f__Bacteroidaceae	g__Prevotella	s__Prevotella sp902798285
R10.414	MAG1500	281.157	482.67	120.667	17.6947	55.5707	13.8927	0.0006	0.000909696	76.92	0	R	d__Bacteria	p__Fibrobacterota	c__Fibrobacteria	Fibrobacterales	f__Fibrobacteraceae	g__Fibrobacter	s__
R10.417	MAG1501	2163.17	3542.54	885.635	0	0	0	<.0001	1.08446e-06	68.27	2.22	R	d__Bacteria	p__Bacteroidota	c__Bacteroidia	Bacteroidales	f__Bacteroidaceae	g__Prevotella	s__Prevotella sp900314995
R10.418	MAG1502	2433.63	3093.78	773.445	65.0068	106.998	26.7495	<.0001	8.28023e-06	89.7	4.49	R	d__Bacteria	p__Firmicutes	c__Bacilli	RF39	f__UBA660	g__RUG13868	s__RUG13868 sp902793375
R10.421	MAG1503	1711.11	2348.46	587.115	0	0	0	<.0001	2.90589e-06	84.07	4.9	R	d__Bacteria	p__Bacteroidota	c__Bacteroidia	Bacteroidales	f__Bacteroidaceae	g__Prevotella	s__Prevotella sp017508965
R10.424	MAG1504	1153.1	1070.49	267.622	0	0	0	<.0001	1.08446e-06	95.95	0.48	R	d__Bacteria	p__Bacteroidota	c__Bacteroidia	Bacteroidales	f__UBA932	g__RUG11257	s__RUG11257 sp017527625
R10.426	MAG1505	442.839	507.236	126.809	0	0	0	<.0001	6.30507e-05	87.9	1.18	R	d__Bacteria	p__Bacteroidota	c__Bacteroidia	Bacteroidales	f__P3	g__UBA1711	s__
R10.428	MAG1506	564.921	429.716	107.429	0	0	0	<.0001	1.08446e-06	58.62	4.11	R	d__Bacteria	p__Firmicutes_C	c__Negativicutes	Selenomonadales	f__Selenomonadaceae	g__RUG12372	s__
R10.429	MAG1507	1281.97	2015.19	503.797	0	0	0	<.0001	2.90589e-06	76.33	4.07	R	d__Bacteria	p__Bacteroidota	c__Bacteroidia	Bacteroidales	f__Bacteroidaceae	g__Prevotella	s__
R10.430	MAG1508	688.722	984.535	246.134	0	0	0	<.0001	1.08446e-06	67.59	1.3	R	d__Bacteria	p__Bacteroidota	c__Bacteroidia	Bacteroidales	f__Bacteroidaceae	g__Prevotella	s__Prevotella sp002350805
R10.435	MAG1509	1020.15	659.13	164.782	45.8186	63.2885	15.8221	<.0001	9.12966e-06	57.98	4.94	R	d__Bacteria	p__Firmicutes_A	c__Clostridia	Christensenellales	f__CAG-74	g__GCA-900199385	s__
R10.437	MAG1510	1038.44	965.44	241.36	0	0	0	<.0001	1.08446e-06	90.06	1.11	R	d__Bacteria	p__Bacteroidota	c__Bacteroidia	Bacteroidales	f__UBA932	g__Cryptobacteroides	s__Cryptobacteroides sp002396335
R10.439	MAG1511	1129.56	1463.6	365.901	0	0	0	<.0001	1.08446e-06	85	2.06	R	d__Bacteria	p__Bacteroidota	c__Bacteroidia	Bacteroidales	f__UBA932	g__Cryptobacteroides	s__Cryptobacteroides sp900318565
R10.440	MAG1512	291.87	282.649	70.6622	0	0	0	<.0001	1.08446e-06	89.36	1.58	R	d__Bacteria	p__Firmicutes_C	c__Negativicutes	Selenomonadales	f__Selenomonadaceae	g__Anaerovibrio	s__Anaerovibrio sp017475925
R10.443	MAG1513	1129.08	4076.08	1019.02	158.54	634.16	158.54	0.0242	0.0294148	93.82	1.85	R	d__Bacteria	p__Firmicutes	c__Bacilli	RF39	f__UBA660	g__RUG13868	s__
R10.446	MAG1514	1513.23	2328.9	582.226	279.307	270.994	67.7486	0.0004	0.000644463	75.49	4.5	R	d__Bacteria	p__Firmicutes_A	c__Clostridia	TANB77	f__CAG-508	g__CAG-492	s__
R10.447	MAG1515	275.035	499.291	124.823	0	0	0	<.0001	1.08446e-06	98.04	0.97	R	d__Bacteria	p__Firmicutes_A	c__Clostridia	Lachnospirales	f__Lachnospiraceae	g__AC2028	s__AC2028 sp902761225
R10.450	MAG1516	366.538	695.959	173.99	0	0	0	0.0015	0.00216609	95.7	1.19	R	d__Bacteria	p__Bacteroidota	c__Bacteroidia	Bacteroidales	f__UBA932	g__Cryptobacteroides	s__
R10.454	MAG1517	603.337	816.896	204.224	0	0	0	<.0001	6.30507e-05	78.33	0	R	d__Bacteria	p__Bacteroidota	c__Bacteroidia	Bacteroidales	f__UBA932	g__Cryptobacteroides	s__Cryptobacteroides sp902801205
R10.455	MAG1518	273.997	367.622	91.9055	0	0	0	<.0001	1.08446e-06	74.17	2.1	R	d__Bacteria	p__Firmicutes_C	c__Negativicutes	Selenomonadales	f__Selenomonadaceae	g__Anaerovibrio	s__Anaerovibrio lipolyticus
R10.456	MAG1519	657.282	1907.27	476.818	0	0	0	0.0015	0.00216609	98.37	2.39	R	d__Bacteria	p__Firmicutes_A	c__Clostridia	Lachnospirales	f__Lachnospiraceae	g__UBA1712	s__UBA1712 sp902779505
R10.457	MAG1520	603.988	456.893	114.223	12.9668	27.5485	6.88713	<.0001	2.90589e-06	86.09	3.45	R	d__Bacteria	p__Firmicutes_A	c__Clostridia	Lachnospirales	f__Lachnospiraceae	g__UBA2868	s__UBA2868 sp002350465
R10.459	MAG1521	184.818	228.024	57.0059	0	0	0	<.0001	2.32495e-05	85.32	1.37	R	d__Bacteria	p__Firmicutes_A	c__Clostridia	Lachnospirales	f__Lachnospiraceae	g__Butyrivibrio	s__Butyrivibrio sp015056495
R10.460	MAG1522	1305.19	2033.53	508.381	0	0	0	<.0001	2.32495e-05	94.58	1.02	R	d__Bacteria	p__Bacteroidota	c__Bacteroidia	Bacteroidales	f__UBA932	g__Cryptobacteroides	s__Cryptobacteroides sp900321655
R10.461	MAG1523	649.039	994.326	248.582	0	0	0	<.0001	2.32495e-05	92.47	2.48	R	d__Bacteria	p__Bacteroidota	c__Bacteroidia	Bacteroidales	f__Bacteroidaceae	g__UBA4372	s__UBA4372 sp017429525
R10.463	MAG1524	513.912	929.77	232.442	0	0	0	<.0001	2.32495e-05	88.02	2.31	R	d__Bacteria	p__Bacteroidota	c__Bacteroidia	Bacteroidales	f__Bacteroidaceae	g__Prevotella	s__Prevotella sp900315455
R10.469	MAG1525	426.144	505.443	126.361	28.7517	51.3538	12.8384	0.0005	0.000801953	99.33	0.34	R	d__Bacteria	p__Firmicutes_A	c__Clostridia	Oscillospirales	f__Ruminococcaceae	g__Ruminococcus	s__Ruminococcus flavefaciens_E
R10.470	MAG1526	1942.89	1816.37	454.092	0	0	0	<.0001	1.08446e-06	54.48	1.72	R	d__Bacteria	p__Bacteroidota	c__Bacteroidia	Bacteroidales	f__Bacteroidaceae	g__Prevotella	s__
R10.471	MAG1527	320.875	928.276	232.069	117.143	103.987	25.9967	0.4739	0.495986	86.8	0	R	d__Bacteria	p__Firmicutes	c__Bacilli	RF39	f__UBA660	g__CAG-302	s__
R10.473	MAG1528	469.713	441.206	110.302	40.3661	38.6312	9.65779	<.0001	3.82722e-06	66.12	6.67	R	d__Bacteria	p__Firmicutes_A	c__Clostridia	Christensenellales	f__CAG-74	g__RUG740	s__
R13.5	MAG1529	1252.38	2651.28	662.819	371.133	638.057	159.514	0.553	0.574982	95.6	1.6	R	d__Archaea	p__Methanobacteriota	c__Methanobacteria	Methanobacteriales	f__Methanobacteriaceae	g__Methanobrevibacter_B	s__Methanobrevibacter_B sp900314605
R13.6	MAG1530	193.682	219.013	54.7533	1.78329	7.13317	1.78329	<.0001	4.46999e-05	55.78	1.19	R	d__Bacteria	p__Spirochaetota	c__Spirochaetia	Treponematales	f__Treponemataceae	g__Treponema_D	s__Treponema_D sp902785455
R13.17	MAG1531	307.063	266.199	66.5498	46.7269	51.3647	12.8412	0.0001	0.000204408	56.95	1.27	R	d__Bacteria	p__Firmicutes_A	c__Clostridia	Lachnospirales	f__Lachnospiraceae	g__RGIG5636	s__RGIG5636 sp017513125
R13.18	MAG1532	195.986	250.334	62.5834	0	0	0	<.0001	0.000161125	61.27	1.13	R	d__Bacteria	p__Firmicutes_A	c__Clostridia	Lachnospirales	f__Lachnospiraceae	g__NK4A136	s__NK4A136 sp017634975
R13.20	MAG1533	267.715	201.66	50.4149	0	0	0	<.0001	1.08446e-06	84.09	3.74	R	d__Bacteria	p__Firmicutes_C	c__Negativicutes	Selenomonadales	f__Selenomonadaceae	g__Anaerovibrio	s__Anaerovibrio sp017475925
R13.23	MAG1534	249.261	372.128	93.0319	6.42767	25.7107	6.42767	0.0003	0.000409743	79.2	3.37	R	d__Bacteria	p__Firmicutes_A	c__Clostridia	Oscillospirales	f__Ruminococcaceae	g__Ruminococcus	s__Ruminococcus flavefaciens_A
R13.43	MAG1535	169.495	370.669	92.6671	14.258	57.032	14.258	0.0813	0.0921456	95.97	0.34	R	d__Bacteria	p__Firmicutes_A	c__Clostridia	Oscillospirales	f__Acutalibacteraceae	g__Fimenecus	s__
R13.75	MAG1536	329.967	297.522	74.3806	111.082	146.615	36.6538	0.001	0.00158354	95.47	7.94	R	d__Bacteria	p__Firmicutes	c__Bacilli	Erysipelotrichales	f__Erysipelotrichaceae	g__UBA636	s__UBA636 sp900321955
R13.81	MAG1537	751.346	2082.49	520.622	0	0	0	0.0079	0.0101688	98.9	2.75	R	d__Bacteria	p__Fibrobacterota	c__Fibrobacteria	Fibrobacterales	f__Fibrobacteraceae	g__Fibrobacter	s__Fibrobacter succinogenes_P
R13.83	MAG1538	142.309	200.616	50.154	0	0	0	<.0001	6.30507e-05	75.82	2.87	R	d__Bacteria	p__Firmicutes_A	c__Clostridia	Oscillospirales	f__Acutalibacteraceae	g__CAG-177	s__CAG-177 sp900319455
R13.92	MAG1539	261.937	359.688	89.922	119.08	133.844	33.4611	0.15	0.165656	88.71	4.15	R	d__Bacteria	p__Firmicutes_A	c__Clostridia	Oscillospirales	f__Acutalibacteraceae	g__Ruminococcus_E	s__Ruminococcus_E sp900319655
R13.108	MAG1540	2736.9	5289.66	1322.42	36.0596	100.256	25.0639	<.0001	2.32495e-05	91.18	1.08	R	d__Bacteria	p__Bacteroidota	c__Bacteroidia	Bacteroidales	f__P3	g__UBA1711	s__UBA1711 sp900314925
R13.172	MAG1541	263.605	160.319	40.0798	0	0	0	<.0001	1.08446e-06	57.61	6.35	R	d__Bacteria	p__Bacteroidota	c__Bacteroidia	Bacteroidales	f__UBA932	g__Cryptobacteroides	s__Cryptobacteroides sp902801885
R13.263	MAG1542	896.069	1643.47	410.867	0	0	0	<.0001	2.32495e-05	90.75	2.89	R	d__Bacteria	p__Bacteroidota	c__Bacteroidia	Bacteroidales	f__Muribaculaceae	g__Sodaliphilus	s__
R13.269	MAG1543	446.938	1229.59	307.396	0	0	0	<.0001	2.90589e-06	98.95	2.1	R	d__Bacteria	p__Spirochaetota	c__Spirochaetia	Treponematales	f__Treponemataceae	g__UBA1240	s__UBA1240 sp001603145
R13.270	MAG1544	507.334	1373.06	343.264	16.096	64.3838	16.096	0.1211	0.136287	85.39	3.89	R	d__Bacteria	p__Bacteroidota	c__Bacteroidia	Bacteroidales	f__Bacteroidaceae	g__UBA1179	s__UBA1179 sp902763885
R13.282	MAG1545	774.706	1079.76	269.939	0	0	0	<.0001	6.30507e-05	86.48	3.36	R	d__Bacteria	p__Bacteroidota	c__Bacteroidia	Bacteroidales	f__Muribaculaceae	g__Sodaliphilus	s__Sodaliphilus sp900319525
R13.287	MAG1546	726.333	673.469	168.367	0	0	0	<.0001	1.08446e-06	79.16	5.43	R	d__Bacteria	p__Firmicutes_C	c__Negativicutes	Selenomonadales	f__Selenomonadaceae	g__RUG12372	s__
R13.295	MAG1547	621.41	513.26	128.315	0	0	0	<.0001	1.08446e-06	94.97	3.37	R	d__Bacteria	p__Firmicutes	c__Bacilli	RFN20	f__CAG-826	g__RUG14515	s__
R13.315	MAG1548	2781.79	5712.71	1428.18	0	0	0	0.0035	0.00478424	99.73	0.02	R	d__Bacteria	p__Bacteroidota	c__Bacteroidia	Bacteroidales	f__Paludibacteraceae	g__UBA1181	s__UBA1181 sp016285885
R13.316	MAG1549	1389.24	1508.16	377.04	0	0	0	<.0001	1.08446e-06	93.3	0.84	R	d__Bacteria	p__Bacteroidota	c__Bacteroidia	Bacteroidales	f__Bacteroidaceae	g__UBA4334	s__UBA4334 sp900316975
R13.318	MAG1550	1645.86	3201.48	800.369	0	0	0	<.0001	2.32495e-05	94.87	1.34	R	d__Bacteria	p__Bacteroidota	c__Bacteroidia	Bacteroidales	f__P3	g__UBA1711	s__UBA1711 sp900317125
R13.319	MAG1551	1476.02	3513.3	878.324	42.8592	74.3634	18.5908	<.0001	2.25166e-05	76	3.21	R	d__Bacteria	p__Firmicutes_A	c__Clostridia	Christensenellales	f__CAG-74	g__GCA-900199385	s__
R13.322	MAG1552	490.942	893.942	223.486	58.5091	165.338	41.3345	0.0007	0.00100784	99.32	0.68	R	d__Bacteria	p__Firmicutes_A	c__Clostridia	Oscillospirales	f__Ruminococcaceae	g__Ruminococcus_D	s__Ruminococcus_D sp902786965
R13.327	MAG1553	258.83	336.965	84.2412	0	0	0	0.0002	0.000400461	69.17	2	R	d__Bacteria	p__Bacteroidota	c__Bacteroidia	Bacteroidales	f__Bacteroidaceae	g__UBA3839	s__UBA3839 sp900314125
R13.341	MAG1554	342.742	1199.19	299.799	155.363	478.469	119.617	0.8818	0.898587	91.72	1.25	R	d__Bacteria	p__Firmicutes_A	c__Clostridia	Oscillospirales	f__Acutalibacteraceae	g__Ruminococcus_E	s__Ruminococcus_E sp902776185
R13.344	MAG1555	946.7	1263.06	315.766	0	0	0	<.0001	0.000161125	50.91	0	R	d__Bacteria	p__Firmicutes_A	c__Clostridia	Lachnospirales	f__Lachnospiraceae	g__UBA3633	s__
R13.345	MAG1556	711.788	1396.51	349.128	0	0	0	<.0001	2.90589e-06	99.2	0.47	R	d__Bacteria	p__Firmicutes_A	c__Clostridia	Lachnospirales	f__Lachnospiraceae	g__Pseudobutyrivibrio	s__Pseudobutyrivibrio sp900112855
R13.346	MAG1557	1598.34	2565.16	641.29	0	0	0	<.0001	1.08446e-06	92.5	3.61	R	d__Bacteria	p__Bacteroidota	c__Bacteroidia	Bacteroidales	f__Bacteroidaceae	g__Prevotella	s__
R13.347	MAG1558	332.952	706.947	176.737	0	0	0	0.0359	0.0419998	91.43	2	R	d__Bacteria	p__Firmicutes_A	c__Clostridia	Lachnospirales	f__Lachnospiraceae	g__UBA1258	s__UBA1258 sp900100895
R13.348	MAG1559	288.975	510.372	127.593	43.4636	88.1398	22.035	0.2883	0.311429	80.38	1.72	R	d__Bacteria	p__Patescibacteria	c__Saccharimonadia	Saccharimonadales	f__Nanosyncoccaceae	g__UBA2834	s__
R13.354	MAG1560	297.437	592.248	148.062	0	0	0	0.0006	0.000956857	68.37	1.08	R	d__Bacteria	p__Bacteroidota	c__Bacteroidia	Bacteroidales	f__P3	g__UBA1217	s__UBA1217 sp017522065
R13.356	MAG1561	365.005	421.278	105.319	101.446	116.743	29.1856	0.0905	0.102393	82.83	2.15	R	d__Bacteria	p__Firmicutes_A	c__Clostridia	Oscillospirales	f__Ruminococcaceae	g__RUG11783	s__RUG11783 sp017513135
R13.357	MAG1562	2470.34	8732.9	2183.22	0	0	0	0.0035	0.00478424	89.25	2.48	R	d__Bacteria	p__Bacteroidota	c__Bacteroidia	Bacteroidales	f__Muribaculaceae	g__Sodaliphilus	s__
R13.358	MAG1563	818.001	479.714	119.929	0	0	0	<.0001	1.08446e-06	85.83	2.3	R	d__Bacteria	p__Bacteroidota	c__Bacteroidia	Bacteroidales	f__UBA932	g__Cryptobacteroides	s__Cryptobacteroides sp900321245
R13.361	MAG1564	1952.27	7554.25	1888.56	0	0	0	0.0737	0.0837988	84.48	9.87	R	d__Bacteria	p__Bacteroidota	c__Bacteroidia	Bacteroidales	f__Bacteroidaceae	g__Prevotella	s__Prevotella sp900315095
R13.363	MAG1565	2277.13	2953.71	738.427	0	0	0	<.0001	1.08446e-06	96.43	4.9	R	d__Bacteria	p__Bacteroidota	c__Bacteroidia	Bacteroidales	f__UBA932	g__Cryptobacteroides	s__
R13.364	MAG1566	854.283	1091.63	272.906	448.727	577.429	144.357	0.1871	0.204241	50.88	0	R	d__Bacteria	p__Firmicutes_A	c__Clostridia	TANB77	f__CAG-508	g__CAG-269	s__
R13.367	MAG1567	758.174	1340.35	335.087	219.427	339.32	84.83	0.3291	0.349238	75.05	7.38	R	d__Bacteria	p__Firmicutes_A	c__Clostridia	TANB77	f__CAG-508	g__Scatovivens	s__
R13.368	MAG1568	3576.1	6438.19	1609.55	0	0	0	<.0001	1.08446e-06	93.82	2.69	R	d__Bacteria	p__Bacteroidota	c__Bacteroidia	Bacteroidales	f__F082	g__Limimorpha	s__Limimorpha sp017395365
R13.370	MAG1569	2395.76	4094.23	1023.56	80.4806	118.112	29.5279	0.0217	0.0264885	67.84	2.49	R	d__Bacteria	p__Firmicutes	c__Bacilli	RF39	f__UBA660	g__RUG13160	s__RUG13160 sp902786275
R13.371	MAG1570	521.156	1546.45	386.612	0	0	0	0.0015	0.00216609	98.13	2.97	R	d__Bacteria	p__Bacteroidota	c__Bacteroidia	Bacteroidales	f__Bacteroidaceae	g__Prevotella	s__Prevotella sp900318625
R13.376	MAG1571	326.712	558.216	139.554	14.258	32.3465	8.08663	<.0001	8.28023e-06	77.82	2.9	R	d__Bacteria	p__Firmicutes_A	c__Clostridia	Christensenellales	f__CAG-74	g__RUG740	s__
R13.379	MAG1572	562.731	831.1	207.775	0	0	0	0.0002	0.000400461	91.11	0.77	R	d__Bacteria	p__Firmicutes_A	c__Clostridia	Lachnospirales	f__Lachnospiraceae	g__NK4A136	s__NK4A136 sp017437785
R13.380	MAG1573	241.913	253.788	63.447	0	0	0	<.0001	8.28023e-06	61.92	2.57	R	d__Bacteria	p__Firmicutes_A	c__Clostridia	Lachnospirales	f__Lachnospiraceae	g__NK4A144	s__NK4A144 sp017633935
R13.385	MAG1574	887.107	1214.39	303.598	59.7164	83.7637	20.9409	<.0001	0.000130669	65.62	6.02	R	d__Bacteria	p__Firmicutes	c__Bacilli	RF39	f__UBA660	g__UBA5578	s__UBA5578 sp902795975
R13.386	MAG1575	364.149	632.167	158.042	0	0	0	<.0001	0.000161125	75.09	0.46	R	d__Bacteria	p__Firmicutes_A	c__Clostridia	Lachnospirales	f__Lachnospiraceae	g__UBA2868	s__
R13.388	MAG1576	908.969	2001.65	500.413	141.758	99.0752	24.7688	0.0003	0.000546933	59.65	0	R	d__Bacteria	p__Firmicutes	c__Bacilli	RF39	f__UBA660	g__RUG705	s__
R13.391	MAG1577	410.788	607.938	151.985	0	0	0	<.0001	8.28023e-06	91.24	6.13	R	d__Bacteria	p__Firmicutes_A	c__Clostridia	Lachnospirales	f__Lachnospiraceae	g__AC2028	s__
R13.392	MAG1578	293.72	385.218	96.3045	101.933	126.15	31.5376	0.0102	0.0130895	92.46	1.9	R	d__Bacteria	p__Firmicutes	c__Bacilli	Erysipelotrichales	f__Erysipelotrichaceae	g__RUG14871	s__
R13.393	MAG1579	272.982	252.057	63.0143	0	0	0	<.0001	1.08446e-06	84.67	3.14	R	d__Bacteria	p__Firmicutes_A	c__Clostridia	Lachnospirales	f__Lachnospiraceae	g__NK4A144	s__NK4A144 sp902782655
R14.13	MAG1580	175.094	164.631	41.1578	0	0	0	<.0001	1.08446e-06	59.35	1.4	R	d__Bacteria	p__Spirochaetota	c__Spirochaetia	Treponematales	f__Treponemataceae	g__Treponema_D	s__Treponema_D sp002373205
R14.17	MAG1581	179.245	257.605	64.4011	0	0	0	<.0001	2.32495e-05	62.77	5.31	R	d__Bacteria	p__Firmicutes_A	c__Clostridia	Lachnospirales	f__Lachnospiraceae	g__XBD2001	s__XBD2001 sp900116395
R14.19	MAG1582	885.857	3125.32	781.329	0	0	0	0.0737	0.0837988	98.15	1.67	R	d__Bacteria	p__Bacteroidota	c__Bacteroidia	Bacteroidales	f__Bacteroidaceae	g__Prevotella	s__Prevotella sp002394385
R14.26	MAG1583	1711.37	4898.5	1224.62	0	0	0	0.0035	0.00478424	98.39	5.11	R	d__Bacteria	p__Bacteroidota	c__Bacteroidia	Bacteroidales	f__P3	g__Phil12	s__Phil12 sp900314725
R14.27	MAG1584	323.11	399.587	99.8968	0	0	0	<.0001	8.28023e-06	93.09	3.87	R	d__Bacteria	p__Bacteroidota	c__Bacteroidia	Bacteroidales	f__Bacteroidaceae	g__Ga6A1	s__Ga6A1 sp900102385
R14.33	MAG1585	302.129	380.2	95.05	0	0	0	0.0015	0.00216609	68.8	3.55	R	d__Bacteria	p__Firmicutes_C	c__Negativicutes	Selenomonadales	f__Selenomonadaceae	g__Quinella	s__
R14.42	MAG1586	189.966	180.592	45.148	0	0	0	<.0001	8.28023e-06	66.25	1.6	R	d__Bacteria	p__Planctomycetota	c__Planctomycetia	Pirellulales	f__Thermoguttaceae	g__RUG369	s__
R14.54	MAG1587	513.073	1508.33	377.084	66.5014	178.401	44.6001	0.4356	0.456729	61.89	0	R	d__Bacteria	p__Patescibacteria	c__Saccharimonadia	Saccharimonadales	f__Nanosyncoccaceae	g__Nanosyncoccus	s__
R14.57	MAG1588	269.596	445.046	111.262	5.71914	12.3388	3.0847	0.0008	0.00125735	93.9	0.51	R	d__Bacteria	p__Firmicutes_A	c__Clostridia	Lachnospirales	f__Lachnospiraceae	g__RUG306	s__
R14.58	MAG1589	190.208	210.364	52.591	29.0573	46.3465	11.5866	0.0016	0.00225031	57.97	1.48	R	d__Bacteria	p__Proteobacteria	c__Gammaproteobacteria	Burkholderiales	f__Burkholderiaceae	g__Oxalobacter	s__Oxalobacter sp017524145
R14.68	MAG1590	661.65	522.987	130.747	0	0	0	<.0001	2.90589e-06	92.12	4.35	R	d__Bacteria	p__Bacteroidota	c__Bacteroidia	Bacteroidales	f__WCHB1-69	g__F23-D06	s__F23-D06 sp900315705
R14.82	MAG1591	376.878	159.923	39.9807	0	0	0	<.0001	1.08446e-06	53.5	5.01	R	d__Bacteria	p__Firmicutes_A	c__Clostridia	Peptostreptococcales	f__Anaerovoracaceae	g__RUG11894	s__RUG11894 sp017626845
R14.97	MAG1592	234.234	484.965	121.241	0	0	0	0.0015	0.00216609	87.01	1.34	R	d__Bacteria	p__Bacteroidota	c__Bacteroidia	Bacteroidales	f__Paludibacteraceae	g__Enterocola	s__
R14.100	MAG1593	222.497	333.255	83.3136	0	0	0	0.0002	0.000400461	87.83	2.07	R	d__Bacteria	p__Firmicutes_A	c__Clostridia	Oscillospirales	f__Acutalibacteraceae	g__UBA1425	s__UBA1425 sp902787275
R14.116	MAG1594	246.152	526.57	131.642	0	0	0	<.0001	2.32495e-05	96.38	0	R	d__Bacteria	p__Firmicutes_A	c__Clostridia	Oscillospirales	f__Acutalibacteraceae	g__CAG-177	s__CAG-177 sp900319455
R14.121	MAG1595	280.9	716.356	179.089	0	0	0	<.0001	0.000161125	95.75	2.68	R	d__Bacteria	p__Firmicutes_A	c__Clostridia	Oscillospirales	f__CAG-272	g__RUG13077	s__RUG13077 sp902785485
R14.145	MAG1596	433.592	536.845	134.211	0	0	0	<.0001	0.000161125	91.13	2.08	R	d__Bacteria	p__Bacteroidota	c__Bacteroidia	Bacteroidales	f__Paludibacteraceae	g__RF16	s__RF16 sp900319025
R14.189	MAG1597	1646.69	3822.31	955.578	40.0772	71.6288	17.9072	0.0083	0.0106828	63.68	0.85	R	d__Bacteria	p__Patescibacteria	c__Saccharimonadia	Saccharimonadales	f__Nanosyncoccaceae	g__UBA2834	s__
R14.263	MAG1598	1828.56	2339.05	584.762	75.4966	165.132	41.2831	<.0001	3.28592e-05	90.6	2	R	d__Bacteria	p__Bacteroidota	c__Bacteroidia	Bacteroidales	f__Bacteroidaceae	g__UBA1179	s__UBA1179 sp902782245
R14.271	MAG1599	2151.65	1786.5	446.625	0	0	0	<.0001	1.08446e-06	85.46	9.7	R	d__Bacteria	p__Bacteroidota	c__Bacteroidia	Bacteroidales	f__UBA932	g__Cryptobacteroides	s__Cryptobacteroides sp902794615
R14.306	MAG1600	1670.73	3985.01	996.252	116.311	244.75	61.1875	0.111	0.125311	62.54	0.85	R	d__Bacteria	p__Patescibacteria	c__Saccharimonadia	Saccharimonadales	f__Nanosyncoccaceae	g__UBA2834	s__
R14.307	MAG1601	316.934	702.99	175.748	8.38689	23.0518	5.76294	0.0171	0.0210138	97.65	0.34	R	d__Bacteria	p__Firmicutes_A	c__Clostridia	Oscillospirales	f__Ruminococcaceae	g__Firm-04	s__Firm-04 sp017427265
R14.318	MAG1602	1531.23	3385.75	846.437	0	0	0	0.0002	0.000400461	98.88	3.42	R	d__Bacteria	p__Firmicutes	c__Bacilli	RFN20	f__CAG-826	g__UBA2450	s__
R14.319	MAG1603	390.466	275.741	68.9353	0	0	0	<.0001	1.08446e-06	66.67	2.17	R	d__Bacteria	p__Bacteroidota	c__Bacteroidia	Bacteroidales	f__UBA932	g__Cryptobacteroides	s__Cryptobacteroides sp017437825
R14.320	MAG1604	218.968	190.933	47.7333	0	0	0	<.0001	8.28023e-06	54.91	3.65	R	d__Bacteria	p__Firmicutes_A	c__Clostridia	Lachnospirales	f__Lachnospiraceae	g__NK4A144	s__NK4A144 sp017633935
R14.327	MAG1605	153.251	467.565	116.891	0	0	0	0.0079	0.0101688	74.46	0	R	d__Bacteria	p__Firmicutes_A	c__Clostridia	Christensenellales	f__UBA1242	g__Caccovivens	s__
R14.347	MAG1606	1399.41	1451.35	362.838	0	0	0	<.0001	1.08446e-06	91.02	2.48	R	d__Bacteria	p__Bacteroidota	c__Bacteroidia	Bacteroidales	f__Bacteroidaceae	g__Prevotella	s__Prevotella sp002393725
R14.348	MAG1607	1243.19	3086.34	771.585	0	0	0	0.0006	0.000956857	93.02	4.91	R	d__Bacteria	p__Bacteroidota	c__Bacteroidia	Bacteroidales	f__Muribaculaceae	g__Sodaliphilus	s__Sodaliphilus sp900318535
R14.350	MAG1608	185.213	322.159	80.5397	0	0	0	<.0001	6.30507e-05	84.76	8.9	R	d__Bacteria	p__Spirochaetota	c__Spirochaetia	Treponematales	f__Treponemataceae	g__Treponema_D	s__
R14.352	MAG1609	744.25	911.277	227.819	0	0	0	<.0001	2.90589e-06	87.24	1.67	R	d__Bacteria	p__Bacteroidota	c__Bacteroidia	Bacteroidales	f__Bacteroidaceae	g__UBA4372	s__UBA4372 sp902778625
R14.355	MAG1610	565	680.55	170.137	0	0	0	<.0001	6.30507e-05	92.47	2.96	R	d__Bacteria	p__Bacteroidota	c__Bacteroidia	Bacteroidales	f__P3	g__UBA1711	s__
R14.357	MAG1611	1019.89	2062.64	515.661	0	0	0	0.0015	0.00216609	97.17	1.38	R	d__Bacteria	p__Bacteroidota	c__Bacteroidia	Bacteroidales	f__Muribaculaceae	g__Sodaliphilus	s__
R14.361	MAG1612	410.402	1175.35	293.837	0	0	0	0.0079	0.0101688	96.51	0.54	R	d__Bacteria	p__Bacteroidota	c__Bacteroidia	Bacteroidales	f__P3	g__UBA1217	s__UBA1217 sp017429685
R14.363	MAG1613	3556.15	2725.48	681.37	0	0	0	<.0001	1.08446e-06	95.71	0.79	R	d__Bacteria	p__Bacteroidota	c__Bacteroidia	Bacteroidales	f__UBA932	g__Cryptobacteroides	s__Cryptobacteroides sp900321245
R14.367	MAG1614	230.956	221.541	55.3852	0	0	0	<.0001	1.08446e-06	70.05	2.99	R	d__Bacteria	p__Firmicutes_A	c__Clostridia	Christensenellales	f__CAG-74	g__SFMI01	s__
R14.368	MAG1615	525.439	646.695	161.674	0	0	0	<.0001	1.08446e-06	90.83	0.48	R	d__Bacteria	p__Bacteroidota	c__Bacteroidia	Bacteroidales	f__UBA932	g__Bact-11	s__Bact-11 sp902789445
R14.371	MAG1616	2642.85	3409.74	852.434	0	0	0	<.0001	1.08446e-06	89.92	1.1	R	d__Bacteria	p__Bacteroidota	c__Bacteroidia	Bacteroidales	f__UBA932	g__Cryptobacteroides	s__
R14.373	MAG1617	1801.34	4906.25	1226.56	0	0	0	0.0035	0.00478424	90.32	1.34	R	d__Bacteria	p__Bacteroidota	c__Bacteroidia	Bacteroidales	f__P3	g__UBA1711	s__UBA1711 sp017448185
R14.374	MAG1618	366.852	235.758	58.9396	0	0	0	<.0001	1.08446e-06	62.55	2.96	R	d__Bacteria	p__Bacteroidota	c__Bacteroidia	Bacteroidales	f__Bacteroidaceae	g__Prevotella	s__Prevotella sp902797505
R14.379	MAG1619	300.482	251.784	62.9459	138.626	72.9048	18.2262	0.0042	0.00563675	60.62	3.33	R	d__Bacteria	p__Firmicutes_A	c__Clostridia	Peptostreptococcales	f__Anaerovoracaceae	g__RUG099	s__
R14.383	MAG1620	608.314	1414.25	353.563	143.449	288.026	72.0065	0.1761	0.192558	92.39	0.4	R	d__Bacteria	p__Firmicutes_A	c__Clostridia	Oscillospirales	f__Acutalibacteraceae	g__Ruminococcus_E	s__Ruminococcus_E sp902799325
R14.384	MAG1621	455.462	472.758	118.19	0	0	0	<.0001	6.30507e-05	56.9	0.71	R	d__Bacteria	p__Bacteroidota	c__Bacteroidia	Bacteroidales	f__UBA932	g__Cryptobacteroides	s__Cryptobacteroides sp017458265
R14.388	MAG1622	2788.96	3475.7	868.924	0	0	0	<.0001	2.90589e-06	79.43	1.64	R	d__Bacteria	p__Bacteroidota	c__Bacteroidia	Bacteroidales	f__Bacteroidaceae	g__Prevotella	s__Prevotella sp002351725
R14.389	MAG1623	781.29	1994.21	498.552	217.746	348.612	87.1531	0.4089	0.429884	76.44	2.49	R	d__Bacteria	p__Firmicutes_A	c__Clostridia	TANB77	f__CAG-465	g__RGIG5622	s__
R14.391	MAG1624	300.065	579.141	144.785	0	0	0	0.0006	0.000956857	99.52	0.48	R	d__Bacteria	p__Firmicutes_A	c__Clostridia	Lachnospirales	f__Lachnospiraceae	g__AC2028	s__AC2028 sp018056425
R14.394	MAG1625	390.807	443.499	110.875	0	0	0	<.0001	1.08446e-06	90.72	0.63	R	d__Bacteria	p__Firmicutes_A	c__Clostridia	Lachnospirales	f__Lachnospiraceae	g__SIG280	s__
R14.396	MAG1626	579.963	923.291	230.823	0	0	0	0.0002	0.000400461	69.64	1.82	R	d__Bacteria	p__Spirochaetota	c__Spirochaetia	Treponematales	f__Treponemataceae	g__Treponema_D	s__
R14.398	MAG1627	264.581	349.575	87.3936	0	0	0	0.0015	0.00216609	79.75	1.01	R	d__Bacteria	p__Firmicutes_A	c__Clostridia	Oscillospirales	f__UBA644	g__HGM12619	s__HGM12619 sp902783255
R14.399	MAG1628	409.84	310.066	77.5166	148.52	114.838	28.7095	0.0005	0.000741961	74.48	8.29	R	d__Bacteria	p__Firmicutes_A	c__Clostridia	Lachnospirales	f__Lachnospiraceae	g__UBA1066	s__UBA1066 sp900314565
R14.402	MAG1629	481.504	915.226	228.806	197.054	110.959	27.7399	0.1416	0.158918	96.93	1.62	R	d__Bacteria	p__Firmicutes_A	c__Clostridia	Lachnospirales	f__Lachnospiraceae	g__CAG-791	s__CAG-791 sp902780385
R14.405	MAG1630	575.309	229.734	57.4336	0	0	0	<.0001	1.08446e-06	55.58	2.4	R	d__Bacteria	p__Bacteroidota	c__Bacteroidia	Bacteroidales	f__Bacteroidaceae	g__Phocaeicola	s__Phocaeicola sp902779535
R14.406	MAG1631	426.432	452.956	113.239	0	0	0	<.0001	1.08446e-06	90.75	6.02	R	d__Bacteria	p__Firmicutes_A	c__Clostridia	Oscillospirales	f__Oscillospiraceae	g__RGIG7114	s__
R14.407	MAG1632	1801.39	1355.14	338.785	20.2914	43.4545	10.8636	<.0001	2.89824e-06	81.26	6.14	R	d__Bacteria	p__Firmicutes_C	c__Negativicutes	Acidaminococcales	f__Acidaminococcaceae	g__Succiniclasticum	s__Succiniclasticum sp902801365
R14.409	MAG1633	942.024	955.587	238.897	0	0	0	<.0001	2.90589e-06	94.23	7.24	R	d__Bacteria	p__Bacteroidota	c__Bacteroidia	Bacteroidales	f__Bacteroidaceae	g__Prevotella	s__
R14.412	MAG1634	318.728	870.669	217.667	2.92031	11.6812	2.92031	0.1211	0.136287	57.89	0	R	d__Bacteria	p__Firmicutes_A	c__Clostridia	Oscillospirales	f__Acutalibacteraceae	g__RGIG9287	s__
R14.414	MAG1635	458.065	412.565	103.141	0	0	0	<.0001	1.08446e-06	78.27	1.9	R	d__Bacteria	p__Bacteroidota	c__Bacteroidia	Bacteroidales	f__UBA932	g__Cryptobacteroides	s__Cryptobacteroides sp900321715
R14.416	MAG1636	1171.96	1640.4	410.101	6.47876	17.9928	4.4982	<.0001	1.93055e-06	97.67	0.84	R	d__Bacteria	p__Firmicutes_A	c__Clostridia	Lachnospirales	f__Lachnospiraceae	g__Butyrivibrio	s__
R14.417	MAG1637	568.639	574.788	143.697	0	0	0	<.0001	2.90589e-06	71.88	3.23	R	d__Bacteria	p__Bacteroidota	c__Bacteroidia	Bacteroidales	f__Bacteroidaceae	g__Prevotella	s__Prevotella sp900316265
R14.423	MAG1638	330.12	469.178	117.295	6.49137	15.0208	3.75521	<.0001	3.81005e-05	96.32	0.93	R	d__Bacteria	p__Firmicutes_A	c__Clostridia	Lachnospirales	f__Lachnospiraceae	g__Butyrivibrio	s__Butyrivibrio fibrisolvens_C
R14.425	MAG1639	1302.58	2155.17	538.793	0	0	0	<.0001	1.08446e-06	83.82	2.33	R	d__Bacteria	p__Bacteroidota	c__Bacteroidia	Bacteroidales	f__Bacteroidaceae	g__Prevotella	s__Prevotella sp902771785
R14.427	MAG1640	451.784	562.944	140.736	0	0	0	<.0001	1.08446e-06	98.71	2.66	R	d__Bacteria	p__Firmicutes_A	c__Clostridia	Lachnospirales	f__Lachnospiraceae	g__NK4A144	s__
R14.428	MAG1641	952.8	1605.54	401.385	0	0	0	<.0001	1.08446e-06	66.48	1.34	R	d__Bacteria	p__Bacteroidota	c__Bacteroidia	Bacteroidales	f__Bacteroidaceae	g__Prevotella	s__Prevotella sp902781315
R14.432	MAG1642	489.106	276.532	69.133	0	0	0	<.0001	1.08446e-06	84.59	3.67	R	d__Bacteria	p__Bacteroidota	c__Bacteroidia	Bacteroidales	f__UBA932	g__Cryptobacteroides	s__Cryptobacteroides sp900317925
R14.435	MAG1643	784.188	543.375	135.844	0	0	0	<.0001	1.08446e-06	62.33	4.32	R	d__Bacteria	p__Spirochaetota	c__Spirochaetia	Treponematales	f__Treponemataceae	g__Treponema_D	s__
R14.437	MAG1644	867.212	1168.57	292.142	2.87079	11.4832	2.87079	<.0001	4.51769e-06	68.07	1.82	R	d__Bacteria	p__Bacteroidota	c__Bacteroidia	Bacteroidales	f__Bacteroidaceae	g__Prevotella	s__Prevotella sp002353485
R14.438	MAG1645	389.453	1440.04	360.01	26.5308	57.6527	14.4132	0.6769	0.69697	80.36	5.15	R	d__Bacteria	p__Firmicutes_A	c__Clostridia	TANB77	f__CAG-508	g__Scatovivens	s__
R14.439	MAG1646	866.256	1100.1	275.025	0	0	0	<.0001	6.30507e-05	92.53	2.53	R	d__Bacteria	p__Bacteroidota	c__Bacteroidia	Bacteroidales	f__Bacteroidaceae	g__Prevotella	s__Prevotella sp017635615
R14.445	MAG1647	590.872	1406.13	351.534	8.95978	35.8391	8.95978	0.0031	0.00437269	89.84	1.01	R	d__Bacteria	p__Firmicutes_A	c__Clostridia	Lachnospirales	f__Lachnospiraceae	g__UBA2868	s__UBA2868 sp017458765
R14.448	MAG1648	359.656	291.336	72.8339	0	0	0	<.0001	2.90589e-06	59.56	3.1	R	d__Bacteria	p__Bacteroidota	c__Bacteroidia	Bacteroidales	f__Bacteroidaceae	g__UBA4372	s__UBA4372 sp902763865
R14.452	MAG1649	473.434	360.298	90.0746	8.06619	18.0054	4.50135	<.0001	2.40898e-06	76.55	3.33	R	d__Bacteria	p__Firmicutes_A	c__Clostridia	Lachnospirales	f__Lachnospiraceae	g__UBA2868	s__UBA2868 sp002350465
R14.453	MAG1650	331.111	1192.76	298.191	0	0	0	0.0737	0.0837988	89.78	1.79	R	d__Bacteria	p__Bacteroidota	c__Bacteroidia	Bacteroidales	f__P3	g__UBA1711	s__UBA1711 sp900317285
R14.454	MAG1651	757.97	765.835	191.459	0	0	0	<.0001	2.90589e-06	58.25	5.68	R	d__Bacteria	p__Bacteroidota	c__Bacteroidia	Bacteroidales	f__WCHB1-69	g__F23-D06	s__F23-D06 sp017527945
R14.455	MAG1652	1619.33	3389.63	847.407	163.009	274.452	68.6129	0.004	0.00538479	76.56	1.64	R	d__Bacteria	p__Firmicutes_A	c__Clostridia	TANB77	f__CAG-508	g__CAG-492	s__
R15.2	MAG1653	1688.5	1023.15	255.786	3.30446	13.2178	3.30446	<.0001	1.48978e-06	97.63	9.15	R	d__Bacteria	p__Firmicutes_C	c__Negativicutes	Acidaminococcales	f__Acidaminococcaceae	g__Succiniclasticum	s__Succiniclasticum sp900315925
R15.12	MAG1654	119.909	220.488	55.1219	1.77167	7.08668	1.77167	0.0107	0.0136645	80.19	1.48	R	d__Bacteria	p__Firmicutes_A	c__Clostridia	Oscillospirales	f__Acutalibacteraceae	g__Fimenecus	s__Fimenecus sp900315985
R15.21	MAG1655	691.135	2587.98	646.994	0	0	0	0.0171	0.0210099	69.91	3.55	R	d__Bacteria	p__Proteobacteria	c__Alphaproteobacteria	Rickettsiales	f__UBA1997	g__RGIG8782	s__RGIG8782 sp017475895
R15.33	MAG1656	179.047	319.575	79.8936	0	0	0	0.0002	0.000400461	88.78	0.42	R	d__Bacteria	p__Firmicutes_A	c__Clostridia	Oscillospirales	f__Acutalibacteraceae	g__CAG-177	s__CAG-177 sp900319455
R15.39	MAG1657	1744.38	5582.06	1395.52	0	0	0	0.0015	0.00216609	95.97	3.33	R	d__Bacteria	p__Bacteroidota	c__Bacteroidia	Bacteroidales	f__P3	g__UBA1711	s__UBA1711 sp900319865
R15.43	MAG1658	463.208	282.794	70.6984	0	0	0	<.0001	1.08446e-06	91.37	4.39	R	d__Bacteria	p__Firmicutes_A	c__Clostridia	Peptostreptococcales	f__Anaerovoracaceae	g__RUG11894	s__RUG11894 sp017626845
R15.69	MAG1659	416.72	694.153	173.538	0	0	0	<.0001	1.08446e-06	96.5	0.7	R	d__Bacteria	p__Spirochaetota	c__Spirochaetia	Treponematales	f__Treponemataceae	g__Treponema_D	s__Treponema_D sp002373205
R15.74	MAG1660	514.03	420.846	105.212	0	0	0	<.0001	1.08446e-06	70.21	0.73	R	d__Bacteria	p__Firmicutes_A	c__Clostridia	Oscillospirales	f__Ruminococcaceae	g__Ruminiclostridium_E	s__Ruminiclostridium_E sp017479645
R15.78	MAG1661	1973.42	3692.76	923.19	12.669	23.9022	5.97555	0.0004	0.000640975	98.94	0.71	R	d__Bacteria	p__Firmicutes_A	c__Clostridia	Saccharofermentanales	f__Saccharofermentanaceae	g__Saccharofermentans	s__Saccharofermentans sp902764825
R15.94	MAG1662	183.171	279.628	69.9071	0	0	0	<.0001	8.28023e-06	94.29	0.93	R	d__Bacteria	p__Spirochaetota	c__Spirochaetia	Treponematales	f__Treponemataceae	g__Treponema_D	s__Treponema_D sp900316905
R15.98	MAG1663	454.139	764.76	191.19	0	0	0	0.0006	0.000956857	99.52	0	R	d__Bacteria	p__Bacteroidota	c__Bacteroidia	Bacteroidales	f__SZUA-534	g__RUG13583	s__
R15.100	MAG1664	419.599	355.431	88.8578	0	0	0	<.0001	2.32495e-05	69	2.62	R	d__Bacteria	p__Bacteroidota	c__Bacteroidia	Bacteroidales	f__UBA932	g__RUG11257	s__RUG11257 sp902767355
R15.105	MAG1665	97.1777	323.036	80.7589	0	0	0	0.0079	0.0101688	64.23	0.81	R	d__Bacteria	p__Firmicutes_A	c__Clostridia	Christensenellales	f__Borkfalkiaceae	g__UBA1259	s__
R15.106	MAG1666	183.913	171.428	42.8571	0	0	0	<.0001	8.28023e-06	62.95	4.02	R	d__Bacteria	p__Planctomycetota	c__Planctomycetia	Pirellulales	f__Thermoguttaceae	g__RUG369	s__
R15.108	MAG1667	302.811	959.708	239.927	0	0	0	0.0079	0.0101688	76.89	0	R	d__Bacteria	p__Fibrobacterota	c__Fibrobacteria	Fibrobacterales	f__Fibrobacteraceae	g__Fibrobacter	s__Fibrobacter succinogenes_P
R15.113	MAG1668	301.263	873.949	218.487	0	0	0	0.0171	0.0210099	96.09	1.09	R	d__Bacteria	p__Firmicutes_A	c__Clostridia	Lachnospirales	f__Lachnospiraceae	g__UBA1712	s__UBA1712 sp002393095
R15.174	MAG1669	196.945	283.207	70.8017	0	0	0	<.0001	0.000161125	58.5	8.56	R	d__Bacteria	p__Firmicutes_A	c__Clostridia	Lachnospirales	f__Lachnospiraceae	g__AC2028	s__AC2028 sp902790935
R15.202	MAG1670	2961.03	3217.46	804.365	0	0	0	<.0001	1.08446e-06	70	2.24	R	d__Bacteria	p__Bacteroidota	c__Bacteroidia	Bacteroidales	f__F082	g__Limimorpha	s__Limimorpha sp002310075
R15.214	MAG1671	2809.84	2642.73	660.682	0	0	0	<.0001	2.90589e-06	61.91	5.28	R	d__Bacteria	p__Bacteroidota	c__Bacteroidia	Bacteroidales	f__Bacteroidaceae	g__Prevotella	s__Prevotella sp002351725
R15.221	MAG1672	317.935	495.586	123.897	0	0	0	<.0001	1.08446e-06	75.91	1.82	R	d__Bacteria	p__Firmicutes_A	c__Clostridia	Lachnospirales	f__Lachnospiraceae	g__SIG280	s__
R15.231	MAG1673	294.214	732.429	183.107	15.7655	26.8778	6.71944	<.0001	8.68752e-05	88.14	5.3	R	d__Bacteria	p__Verrucomicrobiota	c__Kiritimatiellae	RFP12	f__UBA1067	g__RUG572	s__
R15.235	MAG1674	899.981	937.229	234.307	0	0	0	<.0001	1.08446e-06	95.31	2.38	R	d__Bacteria	p__Firmicutes_A	c__Clostridia	Lachnospirales	f__Lachnospiraceae	g__RUG11977	s__RUG11977 sp016287095
R15.237	MAG1675	980.715	1443.34	360.835	0	0	0	<.0001	2.90589e-06	95.14	2.9	R	d__Bacteria	p__Bacteroidota	c__Bacteroidia	Bacteroidales	f__Bacteroidaceae	g__Prevotella	s__
R15.241	MAG1676	1890.58	1797.77	449.444	0	0	0	<.0001	1.08446e-06	97.9	1.92	R	d__Bacteria	p__Spirochaetota	c__Spirochaetia	Treponematales	f__Treponemataceae	g__Treponema_D	s__
R15.243	MAG1677	879.433	1110.44	277.61	0	0	0	<.0001	6.30507e-05	81.08	0.72	R	d__Bacteria	p__Bacteroidota	c__Bacteroidia	Bacteroidales	f__WCHB1-69	g__F23-D06	s__F23-D06 sp017527945
R15.246	MAG1678	226.999	342.166	85.5415	0	0	0	<.0001	0.000161125	82.09	4.31	R	d__Bacteria	p__Firmicutes_A	c__Clostridia	Lachnospirales	f__Lachnospiraceae	g__NK4A136	s__NK4A136 sp902787595
R15.247	MAG1679	501.304	619.257	154.814	0	0	0	<.0001	8.28023e-06	73.39	2.51	R	d__Bacteria	p__Bacteroidota	c__Bacteroidia	Bacteroidales	f__Bacteroidaceae	g__UBA4372	s__
R15.256	MAG1680	603.486	832.545	208.136	0	0	0	<.0001	2.90589e-06	82.3	1.92	R	d__Bacteria	p__Bacteroidota	c__Bacteroidia	Bacteroidales	f__UBA932	g__Cryptobacteroides	s__Cryptobacteroides sp002393945
R15.257	MAG1681	870.766	1246.07	311.518	0	0	0	<.0001	0.000161125	97.54	0	R	d__Bacteria	p__Firmicutes_A	c__Clostridia	Lachnospirales	f__Lachnospiraceae	g__ISDg	s__ISDg sp902797475
R15.259	MAG1682	528.572	743.626	185.906	0	0	0	<.0001	2.90589e-06	96.78	0	R	d__Bacteria	p__Firmicutes_A	c__Clostridia	Lachnospirales	f__Lachnospiraceae	g__NK4A144	s__NK4A144 sp003488445
R15.260	MAG1683	824.015	2709.48	677.37	30.2837	78.6433	19.6608	0.0039	0.00523226	58.49	0.84	R	d__Bacteria	p__Firmicutes_A	c__Clostridia	Christensenellales	f__CAG-74	g__GCA-900199385	s__
R15.262	MAG1684	3011	4918.94	1229.73	6.13878	17.0869	4.27173	0.0004	0.000710401	89.12	2.15	R	d__Bacteria	p__Bacteroidota	c__Bacteroidia	Bacteroidales	f__P3	g__UBA1711	s__UBA1711 sp002372855
R15.264	MAG1685	461.344	986.801	246.7	0	0	0	0.0035	0.00478424	97.62	0.42	R	d__Bacteria	p__Bacteroidota	c__Bacteroidia	Bacteroidales	f__UBA932	g__Cryptobacteroides	s__Cryptobacteroides sp900167925
R15.265	MAG1686	760.196	587.494	146.874	0	0	0	<.0001	1.08446e-06	78.66	1.9	R	d__Bacteria	p__Bacteroidota	c__Bacteroidia	Bacteroidales	f__UBA932	g__Cryptobacteroides	s__Cryptobacteroides sp902794615
R15.266	MAG1687	788.647	815.56	203.89	4.07696	16.3078	4.07696	<.0001	4.51769e-06	66.85	1.52	R	d__Bacteria	p__Bacteroidota	c__Bacteroidia	Bacteroidales	f__Bacteroidaceae	g__Prevotella	s__Prevotella sp002353485
R15.267	MAG1688	219.708	437.364	109.341	1.79031	7.16123	1.79031	0.0107	0.0136645	86.98	0.35	R	d__Bacteria	p__Firmicutes_A	c__Clostridia	Saccharofermentanales	f__Saccharofermentanaceae	g__Saccharofermentans	s__Saccharofermentans sp900314745
R15.268	MAG1689	406.011	1001.05	250.262	349.888	1059.21	264.802	0.4915	0.514196	93.96	0	R	d__Bacteria	p__Firmicutes_A	c__Clostridia	Oscillospirales	f__Acutalibacteraceae	g__Ruminococcus_E	s__Ruminococcus_E sp902776975
R15.269	MAG1690	1131.68	2226.91	556.727	0	0	0	0.0079	0.0101688	94.62	0	R	d__Bacteria	p__Bacteroidota	c__Bacteroidia	Bacteroidales	f__P3	g__Phil12	s__Phil12 sp900314725
R15.270	MAG1691	151.939	474.373	118.593	18.0622	51.6676	12.9169	0.551	0.573251	73.96	7.26	R	d__Bacteria	p__Bacteroidota	c__Bacteroidia	Bacteroidales	f__P3	g__UBA1711	s__UBA1711 sp017501495
R15.275	MAG1692	878.185	1533.7	383.425	0	0	0	<.0001	1.08446e-06	59.8	1.43	R	d__Bacteria	p__Bacteroidota	c__Bacteroidia	Bacteroidales	f__UBA932	g__Cryptobacteroides	s__Cryptobacteroides sp017478685
R15.276	MAG1693	406.651	463.502	115.876	0	0	0	<.0001	2.90589e-06	90.54	1.23	R	d__Bacteria	p__Firmicutes_A	c__Clostridia	Lachnospirales	f__Lachnospiraceae	g__RUG11977	s__RUG11977 sp017427415
R15.279	MAG1694	367.423	593.259	148.315	69.9115	98.5554	24.6388	0.2045	0.222806	77.75	2.25	R	d__Bacteria	p__Firmicutes	c__Bacilli	RF39	f__UBA660	g__RUG11867	s__
R15.281	MAG1695	493.834	358.912	89.728	0	0	0	<.0001	1.08446e-06	65.81	8.92	R	d__Bacteria	p__Bacteroidota	c__Bacteroidia	Bacteroidales	f__UBA932	g__Cryptobacteroides	s__Cryptobacteroides sp017454905
R15.284	MAG1696	1595.45	5134.17	1283.54	0	0	0	0.0015	0.00216609	95.85	1.17	R	d__Bacteria	p__Bacteroidota	c__Bacteroidia	Bacteroidales	f__Bacteroidaceae	g__Prevotella	s__Prevotella sp017423565
R15.287	MAG1697	556.971	534.152	133.538	0	0	0	<.0001	1.08446e-06	88.7	2.65	R	d__Bacteria	p__Bacteroidota	c__Bacteroidia	Bacteroidales	f__UBA932	g__Cryptobacteroides	s__Cryptobacteroides sp900317925
R15.289	MAG1698	901.993	1135.68	283.92	2.93887	11.7555	2.93887	<.0001	0.000133023	96.79	0.77	R	d__Bacteria	p__Firmicutes_A	c__Clostridia	Lachnospirales	f__Lachnospiraceae	g__AC2028	s__AC2028 sp017940415
R15.290	MAG1699	876.577	1700.51	425.127	0	0	0	<.0001	8.28023e-06	64.45	2.01	R	d__Bacteria	p__Firmicutes_A	c__Clostridia	Lachnospirales	f__Lachnospiraceae	g__UBA3633	s__
R15.294	MAG1700	399.247	457.419	114.355	0	0	0	<.0001	1.08446e-06	66.67	7.02	R	d__Bacteria	p__Firmicutes_A	c__Clostridia	Lachnospirales	f__Lachnospiraceae	g__AC2028	s__AC2028 sp902767075
R15.297	MAG1701	614.32	1035.21	258.803	30.4509	65.7745	16.4436	0.003	0.0042641	82.63	1.24	R	d__Bacteria	p__Firmicutes	c__Bacilli	RF39	f__UBA660	g__RUG13160	s__
R15.299	MAG1702	912.311	739.689	184.922	0	0	0	<.0001	1.08446e-06	84.62	0.81	R	d__Bacteria	p__Bacteroidota	c__Bacteroidia	Bacteroidales	f__Bacteroidaceae	g__UBA4334	s__UBA4334 sp900316975
R15.300	MAG1703	1830.62	3377.94	844.484	0	0	0	<.0001	8.28023e-06	82.68	2.53	R	d__Bacteria	p__Firmicutes_A	c__Clostridia	Lachnospirales	f__Lachnospiraceae	g__UBA3633	s__UBA3633 sp902803205
R15.305	MAG1704	863.591	1155.59	288.897	77.6664	86.7798	21.6949	0.0037	0.00498455	83.15	5.17	R	d__Bacteria	p__Firmicutes	c__Bacilli	RF39	f__UBA660	g__UBA5578	s__UBA5578 sp902795975
R16.9	MAG1705	143.962	476.751	119.188	0	0	0	0.1508	0.165656	95.86	0.67	R	d__Bacteria	p__Firmicutes_A	c__Clostridia	Oscillospirales	f__UBA644	g__HGM12619	s__
R16.15	MAG1706	2346.57	3593.05	898.263	59.6547	98.793	24.6983	<.0001	0.000158336	91.57	8.88	R	d__Bacteria	p__Firmicutes	c__Bacilli	RF39	f__UBA660	g__RUG11241	s__
R16.39	MAG1707	352.514	663.569	165.892	89.9231	310.301	77.5752	0.0638	0.0741571	92.47	1.74	R	d__Bacteria	p__Bacteroidota	c__Bacteroidia	Bacteroidales	f__P3	g__UBA1217	s__UBA1217 sp017517715
R16.52	MAG1708	339.028	376.943	94.2357	0	0	0	<.0001	1.08446e-06	80.38	1.98	R	d__Bacteria	p__Firmicutes_A	c__Clostridia	Lachnospirales	f__Lachnospiraceae	g__SIG280	s__
R16.66	MAG1709	403.571	677.925	169.481	0	0	0	<.0001	6.30507e-05	97.54	0	R	d__Bacteria	p__Firmicutes_A	c__Clostridia	Oscillospirales	f__Acutalibacteraceae	g__RUG806	s__RUG806 sp017439205
R16.69	MAG1710	236.11	294.888	73.722	0	0	0	<.0001	6.30507e-05	52.79	2.06	R	d__Bacteria	p__Bacteroidota	c__Bacteroidia	Bacteroidales	f__UBA932	g__Cryptobacteroides	s__Cryptobacteroides sp902789395
R16.72	MAG1711	90.6615	223.885	55.9713	0	0	0	0.0171	0.0210099	72.85	2.9	R	d__Bacteria	p__Proteobacteria	c__Gammaproteobacteria	Burkholderiales	f__Burkholderiaceae	g__Oxalobacter	s__Oxalobacter sp018384065
R16.73	MAG1712	278.477	348.056	87.0139	0	0	0	<.0001	6.30507e-05	87.35	1.46	R	d__Bacteria	p__Firmicutes_A	c__Clostridia	UBA1212	f__UBA1255	g__UBA1255	s__UBA1255 sp017508875
R16.74	MAG1713	212.543	169.734	42.4336	0	0	0	<.0001	1.08446e-06	68.05	3.26	R	d__Bacteria	p__Firmicutes_A	c__Clostridia	Lachnospirales	f__Lachnospiraceae	g__UBA1258	s__
R16.79	MAG1714	94.9604	206.662	51.6656	0	0	0	0.0015	0.00216609	64.9	0.57	R	d__Bacteria	p__Planctomycetota	c__Planctomycetia	Pirellulales	f__Thermoguttaceae	g__RUG11551	s__
R16.88	MAG1715	287.483	226.373	56.5933	0	0	0	<.0001	8.28023e-06	78.16	2.88	R	d__Bacteria	p__Bacteroidota	c__Bacteroidia	Bacteroidales	f__UBA932	g__Cryptobacteroides	s__Cryptobacteroides sp902761655
R16.89	MAG1716	468.044	423.354	105.838	0	0	0	<.0001	6.30507e-05	91.89	3.41	R	d__Bacteria	p__Bacteroidota	c__Bacteroidia	Bacteroidales	f__Muribaculaceae	g__Sodaliphilus	s__Sodaliphilus sp900318065
R16.94	MAG1717	142.612	338.982	84.7455	0	0	0	0.0002	0.000400461	72.59	4.03	R	d__Bacteria	p__Firmicutes_A	c__Clostridia	Christensenellales	f__CAG-74	g__RUG11272	s__
R16.96	MAG1718	2106.6	2789.2	697.301	0	0	0	<.0001	1.08446e-06	85.65	7.26	R	d__Bacteria	p__Bacteroidota	c__Bacteroidia	Bacteroidales	f__P3	g__UBA1711	s__
R16.101	MAG1719	316.96	199.713	49.9283	0	0	0	<.0001	1.08446e-06	70.48	2.3	R	d__Bacteria	p__Firmicutes_A	c__Clostridia	Lachnospirales	f__Lachnospiraceae	g__RUG11977	s__RUG11977 sp016288005
R16.114	MAG1720	320.317	499.994	124.998	42.9686	99.2938	24.8234	0.0007	0.00110331	95.97	1.34	R	d__Bacteria	p__Firmicutes_A	c__Clostridia	Oscillospirales	f__Acutalibacteraceae	g__Fimenecus	s__
R16.116	MAG1721	537.413	1159.48	289.871	0	0	0	<.0001	6.30507e-05	89.45	2.2	R	d__Bacteria	p__Bacteroidota	c__Bacteroidia	Bacteroidales	f__Muribaculaceae	g__Sodaliphilus	s__
R16.120	MAG1722	311.036	283.675	70.9188	0	0	0	<.0001	2.90589e-06	80.34	3.84	R	d__Bacteria	p__Firmicutes_A	c__Clostridia	Christensenellales	f__UBA1242	g__RGIG8050	s__RGIG8050 sp017619495
R16.122	MAG1723	1111.75	3497.22	874.304	112.802	205.297	51.3243	0.2042	0.222641	93.41	5.06	R	d__Bacteria	p__Firmicutes_A	c__Clostridia	Oscillospirales	f__Acutalibacteraceae	g__Ruminococcus_E	s__Ruminococcus_E sp902798755	9.85574
R16.134	MAG1724	1273.62	3264.81	816.202	23.5564	94.2255	23.5564	<.0001	1.47015e-05	91.36	2.65	R	d__Bacteria	p__Firmicutes_A	c__Clostridia	Lachnospirales	f__Lachnospiraceae	g__UBA2868	s__UBA2868 sp900320345
R16.138	MAG1725	1007.04	1262.99	315.747	0	0	0	<.0001	1.08446e-06	69.23	6.9	R	d__Bacteria	p__Bacteroidota	c__Bacteroidia	Bacteroidales	f__UBA932	g__Cryptobacteroides	s__Cryptobacteroides sp900321655
R16.141	MAG1726	178.83	342.338	85.5845	33.7828	95.2481	23.812	0.0286	0.0346815	95.97	0.67	R	d__Bacteria	p__Firmicutes_A	c__Clostridia	Oscillospirales	f__Acutalibacteraceae	g__Fimenecus	s__Fimenecus sp900315985
R16.144	MAG1727	415.138	328.111	82.0276	0	0	0	<.0001	2.90589e-06	67.83	5.4	R	d__Bacteria	p__Bacteroidota	c__Bacteroidia	Bacteroidales	f__UBA932	g__Cryptobacteroides	s__Cryptobacteroides sp902785825
R16.151	MAG1728	1806.14	3339.58	834.895	154.916	418.201	104.55	<.0001	2.84026e-05	56.13	1.06	R	d__Bacteria	p__Firmicutes_A	c__Clostridia	Christensenellales	f__CAG-74	g__GCA-900199385	s__
R16.164	MAG1729	1240.62	2549.81	637.451	0	0	0	<.0001	1.08446e-06	99.3	2.47	R	d__Bacteria	p__Spirochaetota	c__Spirochaetia	Treponematales	f__Treponemataceae	g__Treponema_D	s__
R16.271	MAG1730	236.678	65.2065	16.3016	435.501	328.986	82.2465	0.0093	0.0119088	62.52	7.31	Ce	d__Bacteria	p__Bacteroidota	c__Bacteroidia	Chitinophagales	f__Chitinophagaceae	g__Sediminibacterium	s__Sediminibacterium magnilacihabitans
R16.307	MAG1731	512.294	861.583	215.396	0	0	0	0.0002	0.000400461	90.15	5.67	R	d__Bacteria	p__Bacteroidota	c__Bacteroidia	Bacteroidales	f__UBA932	g__Egerieousia	s__Egerieousia sp900316795
R16.317	MAG1732	941.051	1549.41	387.353	0	0	0	<.0001	1.08446e-06	88.81	2.14	R	d__Bacteria	p__Bacteroidota	c__Bacteroidia	Bacteroidales	f__UBA932	g__Cryptobacteroides	s__Cryptobacteroides sp900318565
R16.318	MAG1733	1026.67	844.273	211.068	0	0	0	<.0001	1.08446e-06	96.03	2.04	R	d__Bacteria	p__Bacteroidota	c__Bacteroidia	Bacteroidales	f__UBA932	g__Cryptobacteroides	s__Cryptobacteroides sp902803715
R16.319	MAG1734	392.284	603.206	150.801	0	0	0	<.0001	6.30507e-05	73.75	0.98	R	d__Bacteria	p__Firmicutes_A	c__Clostridia	Lachnospirales	f__Lachnospiraceae	g__UBA1712	s__UBA1712 sp902789785
R16.321	MAG1735	767.968	1032.14	258.035	0	0	0	<.0001	1.08446e-06	93.1	0.68	R	d__Bacteria	p__Bacteroidota	c__Bacteroidia	Bacteroidales	f__UBA932	g__Cryptobacteroides	s__Cryptobacteroides sp900321715
R16.325	MAG1736	192.743	746.576	186.644	84.8283	339.313	84.8283	0.5511	0.573251	96.61	0.81	R	d__Bacteria	p__Firmicutes_A	c__Clostridia	Christensenellales	f__CAG-138	g__UBA3792	s__UBA3792 sp902792295
R16.328	MAG1737	490.718	667.269	166.817	0	0	0	<.0001	0.000161125	92.3	5.62	R	d__Bacteria	p__Firmicutes	c__Bacilli	RFN20	f__CAG-826	g__RUG14515	s__
R16.332	MAG1738	2787.87	5055.27	1263.82	0	0	0	<.0001	2.90589e-06	63.23	0.88	R	d__Bacteria	p__Bacteroidota	c__Bacteroidia	Bacteroidales	f__Bacteroidaceae	g__Prevotella	s__Prevotella sp002351725
R16.333	MAG1739	514.848	1189.21	297.303	0	0	0	<.0001	1.08446e-06	93.38	3.93	R	d__Bacteria	p__Firmicutes	c__Bacilli	RFN20	f__CAG-826	g__RUG14515	s__
R16.347	MAG1740	468.858	1688.75	422.187	0	0	0	0.0015	0.00216609	74.21	5.59	R	d__Bacteria	p__Firmicutes_C	c__Negativicutes	Selenomonadales	f__Selenomonadaceae	g__Quinella	s__Quinella sp017479925
R16.359	MAG1741	2677.32	6054.77	1513.69	0	0	0	<.0001	1.08446e-06	70	7.76	R	d__Bacteria	p__Bacteroidota	c__Bacteroidia	Bacteroidales	f__F082	g__Limimorpha	s__
R16.360	MAG1742	439.87	1313.38	328.344	240.064	594.389	148.597	0.7205	0.740959	100	1.08	R	d__Bacteria	p__Bacteroidota	c__Bacteroidia	Bacteroidales	f__Paludibacteraceae	g__UBA1723	s__UBA1723 sp002371265
R16.361	MAG1743	2364.42	5995.15	1498.79	0	0	0	<.0001	2.90589e-06	86.18	3.34	R	d__Bacteria	p__Bacteroidota	c__Bacteroidia	Bacteroidales	f__Bacteroidaceae	g__Prevotella	s__Prevotella sp902775475
R16.363	MAG1744	488.924	1847.85	461.963	0	0	0	0.0171	0.0210099	100	1.83	R	d__Bacteria	p__Fibrobacterota	c__Fibrobacteria	Fibrobacterales	f__Fibrobacteraceae	g__Fibrobacter	s__Fibrobacter sp002449765
R16.365	MAG1745	927.561	2957.72	739.43	28.4016	113.606	28.4016	0.0009	0.00139803	94.64	9	R	d__Bacteria	p__Firmicutes_A	c__Clostridia	Christensenellales	f__CAG-74	g__RUG740	s__
R16.366	MAG1746	614.864	669.995	167.499	87.4173	135.598	33.8996	<.0001	3.11752e-05	94.83	1.34	R	d__Bacteria	p__Firmicutes_A	c__Clostridia	Oscillospirales	f__Oscillospiraceae	g__Limivicinus	s__Limivicinus sp900317375
R16.374	MAG1747	3053.94	4505.97	1126.49	0	0	0	<.0001	0.000161125	94.35	1.08	R	d__Bacteria	p__Bacteroidota	c__Bacteroidia	Bacteroidales	f__P3	g__UBA1711	s__
R16.376	MAG1748	1490.82	2424.61	606.153	0	0	0	<.0001	0.000161125	92.1	2.15	R	d__Bacteria	p__Bacteroidota	c__Bacteroidia	Bacteroidales	f__WCHB1-69	g__F23-D06	s__F23-D06 sp900315705
R16.378	MAG1749	1113.8	1036.33	259.082	9.9661	23.9895	5.99736	<.0001	2.90589e-06	99.52	0.16	R	d__Bacteria	p__Firmicutes_A	c__Clostridia	Lachnospirales	f__Lachnospiraceae	g__Pseudobutyrivibrio	s__Pseudobutyrivibrio sp900112855
R16.381	MAG1750	339.36	878.989	219.747	0	0	0	0.0359	0.0419998	84.75	0	R	d__Bacteria	p__Firmicutes_A	c__Clostridia	Saccharofermentanales	f__Saccharofermentanaceae	g__Saccharofermentans	s__Saccharofermentans sp902801755
R16.383	MAG1751	143.258	452.348	113.087	72.4433	247.594	61.8984	0.9211	0.933723	91.58	0.56	R	d__Bacteria	p__Firmicutes_A	c__Clostridia	Oscillospirales	f__Acutalibacteraceae	g__CAG-964	s__CAG-964 sp902762375
R16.386	MAG1752	354.596	1028.93	257.233	0	0	0	0.0015	0.00216609	93.45	0.95	R	d__Bacteria	p__Firmicutes_C	c__Negativicutes	Selenomonadales	f__Selenomonadaceae	g__Quinella	s__
R16.387	MAG1753	1134.33	1566.55	391.637	26.6842	75.5809	18.8952	<.0001	2.90589e-06	88.56	2.35	R	d__Bacteria	p__Bacteroidota	c__Bacteroidia	Bacteroidales	f__Bacteroidaceae	g__UBA1179	s__UBA1179 sp902782245
R16.392	MAG1754	395.009	610.363	152.591	29.7812	119.125	29.7812	0.0002	0.000399883	91.67	1.28	R	d__Bacteria	p__Eremiobacterota	c__Xenobia	CADAWZ01	f__CADAWZ01	g__CADAWZ01	s__
R16.393	MAG1755	666.571	1310.44	327.611	88.8524	107.725	26.9312	<.0001	0.000140904	82.6	8.03	R	d__Bacteria	p__Firmicutes	c__Bacilli	RF39	f__UBA660	g__UMGS1449	s__
R16.394	MAG1756	1385.48	1284.93	321.232	0	0	0	<.0001	1.08446e-06	83.15	1.67	R	d__Bacteria	p__Bacteroidota	c__Bacteroidia	Bacteroidales	f__Bacteroidaceae	g__Prevotella	s__
R16.395	MAG1757	486.113	668.572	167.143	0	0	0	<.0001	1.08446e-06	90.43	3.49	R	d__Bacteria	p__Bacteroidota	c__Bacteroidia	Bacteroidales	f__UBA932	g__Bact-11	s__Bact-11 sp902789445
R16.396	MAG1758	1401.35	1097.27	274.318	0	0	0	<.0001	1.08446e-06	85.79	3.77	R	d__Bacteria	p__Bacteroidota	c__Bacteroidia	Bacteroidales	f__Bacteroidaceae	g__Prevotella	s__Prevotella sp900316985
R16.397	MAG1759	670.467	510.043	127.511	0	0	0	<.0001	1.08446e-06	77.06	9.23	R	d__Bacteria	p__Bacteroidota	c__Bacteroidia	Bacteroidales	f__UBA932	g__Cryptobacteroides	s__
R16.399	MAG1760	380.009	241.125	60.2812	3.86751	10.6296	2.6574	<.0001	1.93055e-06	62.79	1.75	R	d__Bacteria	p__Firmicutes_A	c__Clostridia	Lachnospirales	f__Lachnospiraceae	g__UBA2868	s__UBA2868 sp002350465
R16.401	MAG1761	520.176	539.751	134.938	0	0	0	<.0001	1.08446e-06	94.52	0.5	R	d__Bacteria	p__Bacteroidota	c__Bacteroidia	Bacteroidales	f__UBA932	g__Bact-11	s__Bact-11 sp017443845
R16.402	MAG1762	604.023	724.339	181.085	0	0	0	<.0001	8.28023e-06	87.9	3.22	R	d__Bacteria	p__Firmicutes_A	c__Clostridia	Lachnospirales	f__Lachnospiraceae	g__AC2028	s__AC2028 sp002373975
R16.403	MAG1763	1379.11	2798.6	699.65	0	0	0	<.0001	1.08446e-06	83.06	4.66	R	d__Bacteria	p__Bacteroidota	c__Bacteroidia	Bacteroidales	f__F082	g__Limimorpha	s__
R16.408	MAG1764	582.812	783.068	195.767	0	0	0	<.0001	1.08446e-06	54.08	6.9	R	d__Bacteria	p__Bacteroidota	c__Bacteroidia	Bacteroidales	f__UBA932	g__Cryptobacteroides	s__
R16.410	MAG1765	553.845	1135.57	283.893	30.8952	109.325	27.3313	0.0015	0.00216609	95.86	0	R	d__Bacteria	p__Firmicutes_A	c__Clostridia	Saccharofermentanales	f__Saccharofermentanaceae	g__Saccharofermentans	s__Saccharofermentans sp902782125
R16.412	MAG1766	499.374	680.811	170.203	0	0	0	<.0001	2.90589e-06	55.72	2.31	R	d__Bacteria	p__Bacteroidota	c__Bacteroidia	Bacteroidales	f__Bacteroidaceae	g__Prevotella	s__
R16.413	MAG1767	226.631	279.876	69.9691	0	0	0	<.0001	1.08446e-06	87.2	3.08	R	d__Bacteria	p__Firmicutes_A	c__Clostridia	Christensenellales	f__CAG-74	g__SFMI01	s__
R16.414	MAG1768	391.553	266.84	66.7099	101.389	114.355	28.5888	<.0001	8.93786e-05	80.36	6.25	R	d__Bacteria	p__Firmicutes_A	c__Clostridia	Lachnospirales	f__Lachnospiraceae	g__RGIG5612	s__RGIG5612 sp017536965
R16.419	MAG1769	636.03	632.321	158.08	0	0	0	<.0001	6.30507e-05	58.76	2.15	R	d__Bacteria	p__Bacteroidota	c__Bacteroidia	Bacteroidales	f__WCHB1-69	g__F23-D06	s__F23-D06 sp017527945
R16.420	MAG1770	613.666	2269.15	567.286	200.504	676.812	169.203	0.9087	0.923209	76.84	3.04	R	d__Bacteria	p__Firmicutes_A	c__Clostridia	TANB77	f__CAG-508	g__CAG-492	s__
R16.427	MAG1771	466.021	441.019	110.255	0	0	0	<.0001	8.28023e-06	95.6	7.86	R	d__Bacteria	p__Bacteroidota	c__Bacteroidia	Bacteroidales	f__UBA932	g__RUG11257	s__RUG11257 sp902767355
R16.430	MAG1772	690.985	470.334	117.583	0	0	0	<.0001	2.90589e-06	86.6	1.69	R	d__Bacteria	p__Bacteroidota	c__Bacteroidia	Bacteroidales	f__Bacteroidaceae	g__Prevotella	s__Prevotella sp900316265
R16.431	MAG1773	273.22	783.193	195.798	0	0	0	0.0171	0.0210099	54.48	0.49	R	d__Bacteria	p__Bacteroidota	c__Bacteroidia	Bacteroidales	f__UBA932	g__Cryptobacteroides	s__Cryptobacteroides sp017627955
R16.433	MAG1774	598.054	522.054	130.514	0	0	0	<.0001	1.08446e-06	71.34	4.57	R	d__Bacteria	p__Firmicutes_C	c__Negativicutes	Selenomonadales	f__Selenomonadaceae	g__RUG12372	s__
R16.434	MAG1775	943.474	797.064	199.266	5.8364	15.9535	3.98837	<.0001	1.93055e-06	69.15	3.64	R	d__Bacteria	p__Spirochaetota	c__Spirochaetia	Treponematales	f__Treponemataceae	g__Treponema_D	s__Treponema_D sp004554075
R16.435	MAG1776	290.855	618.791	154.698	0	0	0	0.0002	0.000400461	94.94	0.63	R	d__Bacteria	p__Firmicutes_C	c__Negativicutes	Selenomonadales	f__Selenomonadaceae	g__Quinella	s__Quinella sp017529935
R16.439	MAG1777	375.766	587.125	146.781	0	0	0	<.0001	8.28023e-06	97.32	0.34	R	d__Bacteria	p__Firmicutes_A	c__Clostridia	Oscillospirales	f__Ruminococcaceae	g__Ruminiclostridium_E	s__
R16.440	MAG1778	414.749	616.703	154.176	0	0	0	0.0002	0.000400461	96.3	1.82	R	d__Bacteria	p__Bacteroidota	c__Bacteroidia	Bacteroidales	f__UBA3663	g__UBA3663	s__UBA3663 sp902779265
R16.441	MAG1779	285.319	408.938	102.235	9.69795	20.9571	5.23929	<.0001	1.37964e-05	95.15	3.22	R	d__Bacteria	p__Firmicutes_A	c__Clostridia	Peptostreptococcales	f__Anaerovoracaceae	g__RUG14258	s__RUG14258 sp017515705
R16.444	MAG1780	813.098	1671.14	417.786	0	0	0	<.0001	0.000161125	89.3	0.54	R	d__Bacteria	p__Bacteroidota	c__Bacteroidia	Bacteroidales	f__P3	g__UBA1711	s__UBA1711 sp002372855
R16.445	MAG1781	927.457	2178.96	544.741	5.94927	23.7971	5.94927	0.0003	0.000409743	97.54	0.76	R	d__Bacteria	p__Firmicutes_A	c__Clostridia	Lachnospirales	f__Lachnospiraceae	g__ISDg	s__ISDg sp902797475
R16.446	MAG1782	233.744	235.994	58.9986	0	0	0	<.0001	1.08446e-06	93.21	3.54	R	d__Bacteria	p__Bacteroidota	c__Bacteroidia	Bacteroidales	f__UBA932	g__Cryptobacteroides	s__Cryptobacteroides sp902801885
R16.453	MAG1783	400.314	202.445	50.6112	0	0	0	<.0001	1.08446e-06	53.95	1.59	R	d__Bacteria	p__Bacteroidota	c__Bacteroidia	Bacteroidales	f__UBA932	g__Cryptobacteroides	s__Cryptobacteroides sp900317065
R16.456	MAG1784	4793	7655.73	1913.93	0	0	0	<.0001	0.000161125	94.67	0	R	d__Bacteria	p__Firmicutes	c__Bacilli	Acholeplasmatales	f__Anaeroplasmataceae	g__RGIG10196	s__
R16.457	MAG1785	1189.9	1158	289.499	155.987	80.3383	20.0846	0.0047	0.00627214	83.15	0	R	d__Bacteria	p__Firmicutes	c__Bacilli	RF39	f__UBA660	g__RGIG4266	s__
R16.458	MAG1786	323.315	263.991	65.9978	345.328	252.925	63.2311	0.6242	0.645801	83.07	5.93	Ce	d__Bacteria	p__Firmicutes_A	c__Clostridia	Peptostreptococcales	f__Anaerovoracaceae	g__RUG099	s__
R16.459	MAG1787	726.151	625.233	156.308	0	0	0	<.0001	2.90589e-06	86.89	2.92	R	d__Bacteria	p__Bacteroidota	c__Bacteroidia	Bacteroidales	f__Bacteroidaceae	g__Prevotella	s__Prevotella sp017635615
R16.464	MAG1788	3350.22	5639.42	1409.86	0	0	0	<.0001	1.08446e-06	73.11	3.89	R	d__Bacteria	p__Bacteroidota	c__Bacteroidia	Bacteroidales	f__Bacteroidaceae	g__Prevotella	s__Prevotella sp902798285
R16.468	MAG1789	1360.13	1558.65	389.662	70.5166	76.3852	19.0963	<.0001	5.05865e-06	90.91	2.68	R	d__Bacteria	p__Firmicutes_A	c__Clostridia	Christensenellales	f__CAG-74	g__GCA-900199385	s__GCA-900199385 sp900315675
R16.469	MAG1790	885.419	1479.85	369.964	0	0	0	<.0001	6.30507e-05	93.56	1.12	R	d__Bacteria	p__Bacteroidota	c__Bacteroidia	Bacteroidales	f__Bacteroidaceae	g__UBA4293	s__UBA4293 sp002395835
R23.26	MAG1791	149.473	240.957	60.2394	59.5447	86.8225	21.7056	0.1281	0.144083	60.6	2.08	R	d__Bacteria	p__Firmicutes_A	c__Clostridia	Oscillospirales	f__Acutalibacteraceae	g__UMGS1491	s__UMGS1491 sp017406805
R23.36	MAG1792	1048.49	746.129	186.532	0	0	0	<.0001	1.08446e-06	72.39	6.55	R	d__Bacteria	p__Bacteroidota	c__Bacteroidia	Bacteroidales	f__UBA932	g__Cryptobacteroides	s__Cryptobacteroides sp900318565
R23.56	MAG1793	2516.5	5019.64	1254.91	682.021	1365.81	341.452	0.0092	0.0117503	87.87	4.49	R	d__Bacteria	p__Firmicutes	c__Bacilli	RF39	f__UBA660	g__RUG13038	s__
R23.66	MAG1794	210.28	259.633	64.9084	21.4897	50.2841	12.571	<.0001	7.70049e-05	76.65	0.68	R	d__Bacteria	p__Firmicutes_A	c__Clostridia	Oscillospirales	f__Ruminococcaceae	g__Ruminococcus_D	s__Ruminococcus_D sp002371625
R23.68	MAG1795	254.643	313.892	78.473	1.88019	7.52076	1.88019	0.0006	0.000956857	81.54	1.06	R	d__Bacteria	p__Firmicutes_A	c__Clostridia	Oscillospirales	f__Ruminococcaceae	g__Firm-04	s__
R23.69	MAG1796	476.721	971.513	242.878	0	0	0	<.0001	1.08446e-06	76.19	1.59	R	d__Bacteria	p__Firmicutes_A	c__Clostridia	Oscillospirales	f__Ruminococcaceae	g__Ruminiclostridium_E	s__Ruminiclostridium_E sp902780695
R23.71	MAG1797	767.399	2160.82	540.206	0	0	0	0.0035	0.00478424	98.12	1.12	R	d__Bacteria	p__Bacteroidota	c__Bacteroidia	Bacteroidales	f__Paludibacteraceae	g__Enterocola	s__Enterocola sp900316995
R23.78	MAG1798	440.48	490.63	122.658	0	0	0	<.0001	1.08446e-06	97.2	1.47	R	d__Bacteria	p__Spirochaetota	c__Spirochaetia	Treponematales	f__Treponemataceae	g__Treponema_D	s__Treponema_D sp902785455
R23.84	MAG1799	23783.7	26677.5	6669.39	4.14094	11.8449	2.96124	<.0001	1.93055e-06	94.17	0.88	R	d__Bacteria	p__Bacteroidota	c__Bacteroidia	Bacteroidales	f__Muribaculaceae	g__Sodaliphilus	s__Sodaliphilus sp902762385
R23.92	MAG1800	3335.58	8914.58	2228.64	0	0	0	<.0001	1.08446e-06	93.36	3.43	R	d__Bacteria	p__Bacteroidota	c__Bacteroidia	Bacteroidales	f__Bacteroidaceae	g__Prevotella	s__Prevotella sp017508965
R23.100	MAG1801	305.08	259.57	64.8926	0	0	0	<.0001	8.28023e-06	62.89	6.23	R	d__Bacteria	p__Bacteroidota	c__Bacteroidia	Bacteroidales	f__UBA932	g__Cryptobacteroides	s__Cryptobacteroides sp902761655
R23.103	MAG1802	36.8613	129.308	32.3269	102.904	272.715	68.1787	0.5915	0.613652	81.16	4.25	Ce	d__Bacteria	p__Firmicutes_A	c__Clostridia	Oscillospirales	f__Acutalibacteraceae	g__Ruminococcus_E	s__
R23.104	MAG1803	265.425	236.319	59.0798	0	0	0	<.0001	1.08446e-06	98.11	1.81	R	d__Bacteria	p__Firmicutes_C	c__Negativicutes	Selenomonadales	f__Selenomonadaceae	g__Anaerovibrio	s__Anaerovibrio sp017475925
R23.109	MAG1804	600.432	372.259	93.0649	0	0	0	<.0001	1.08446e-06	78.21	3.32	R	d__Bacteria	p__Firmicutes_A	c__Clostridia	Peptostreptococcales	f__Anaerovoracaceae	g__RUG11894	s__RUG11894 sp902773665
R23.113	MAG1805	308.71	444.595	111.149	0	0	0	<.0001	0.000161125	69.07	2.04	R	d__Bacteria	p__Planctomycetota	c__Planctomycetia	Pirellulales	f__Thermoguttaceae	g__RUG369	s__RUG369 sp902803085
R23.115	MAG1806	496.146	473.379	118.345	0	0	0	0.0002	0.000400461	91.22	2.79	R	d__Bacteria	p__Firmicutes_A	c__Clostridia	Lachnospirales	f__Lachnospiraceae	g__NK4A136	s__NK4A136 sp017437785
R23.116	MAG1807	147.459	199.746	49.9366	0	0	0	<.0001	0.000161125	70.59	0.68	R	d__Bacteria	p__Firmicutes_A	c__Clostridia	Oscillospirales	f__Ruminococcaceae	g__Ruminococcus_D	s__Ruminococcus_D albus_A
R23.206	MAG1808	1448.74	858.189	214.547	22.4769	61.5002	15.3751	<.0001	1.93055e-06	93.79	7.96	R	d__Bacteria	p__Firmicutes_C	c__Negativicutes	Acidaminococcales	f__Acidaminococcaceae	g__Succiniclasticum	s__Succiniclasticum sp900315925
R23.224	MAG1809	85.1238	200.664	50.1659	0	0	0	0.0737	0.0837988	85.38	6.09	R	d__Bacteria	p__Synergistota	c__Synergistia	Synergistales	f__Aminobacteriaceae	g__Fretibacterium	s__
R23.279	MAG1810	2072.92	4703.7	1175.92	32.9798	75.7777	18.9444	<.0001	2.90589e-06	98.01	1.45	R	d__Bacteria	p__Firmicutes_A	c__Clostridia	Lachnospirales	f__Lachnospiraceae	g__AC2028	s__AC2028 sp000702685
R23.286	MAG1811	1047.22	1032.65	258.162	0	0	0	<.0001	1.08446e-06	98.88	2.25	R	d__Bacteria	p__Firmicutes	c__Bacilli	RFN20	f__CAG-826	g__RUG14515	s__
R23.296	MAG1812	860.903	1610.94	402.735	0	0	0	0.0006	0.000956857	97.62	0.42	R	d__Bacteria	p__Bacteroidota	c__Bacteroidia	Bacteroidales	f__UBA932	g__Cryptobacteroides	s__Cryptobacteroides sp900167925
R23.301	MAG1813	2212.95	1981.95	495.488	0	0	0	<.0001	1.08446e-06	70.77	3.9	R	d__Bacteria	p__Bacteroidota	c__Bacteroidia	Bacteroidales	f__UBA932	g__Cryptobacteroides	s__
R23.306	MAG1814	380.096	632.706	158.177	0	0	0	<.0001	2.32495e-05	87.45	0.15	R	d__Bacteria	p__Proteobacteria	c__Gammaproteobacteria	Enterobacterales	f__Succinivibrionaceae	g__Succinivibrio	s__Succinivibrio dextrinosolvens_A
R23.311	MAG1815	332.404	595.037	148.759	72.3298	120.814	30.2036	0.021	0.0256718	83.17	7.12	R	d__Bacteria	p__Firmicutes	c__Bacilli	Erysipelotrichales	f__Erysipelotrichaceae	g__UBA636	s__UBA636 sp017428765
R23.314	MAG1816	179.663	309.434	77.3586	1.61792	6.4717	1.61792	0.0107	0.0136645	90.41	3.78	R	d__Bacteria	p__Firmicutes_A	c__Clostridia	Saccharofermentanales	f__Saccharofermentanaceae	g__Saccharofermentans	s__Saccharofermentans sp900314745
R23.324	MAG1817	961.313	1488.11	372.027	0	0	0	<.0001	6.30507e-05	85.09	1.4	R	d__Bacteria	p__Spirochaetota	c__Spirochaetia	Treponematales	f__Treponemataceae	g__Treponema_D	s__
R23.337	MAG1818	206.731	429.744	107.436	0	0	0	<.0001	0.000161125	93.84	6.18	R	d__Bacteria	p__Firmicutes_A	c__Clostridia	Lachnospirales	f__Lachnospiraceae	g__Butyrivibrio	s__Butyrivibrio sp015056495
R23.338	MAG1819	203.497	247.437	61.8592	0	0	0	<.0001	8.28023e-06	77.37	7.53	R	d__Bacteria	p__Firmicutes_A	c__Clostridia	Lachnospirales	f__Lachnospiraceae	g__XBB2008	s__
R23.342	MAG1820	390.941	1563.76	390.941	0	0	0	0.3173	0.337339	93.21	4.07	R	d__Bacteria	p__Bacteroidota	c__Bacteroidia	Bacteroidales	f__Bacteroidaceae	g__Prevotella	s__
R23.347	MAG1821	517.658	598.561	149.64	0	0	0	<.0001	8.28023e-06	93.1	4.86	R	d__Bacteria	p__Bacteroidota	c__Bacteroidia	Bacteroidales	f__Bacteroidaceae	g__Prevotella	s__Prevotella sp900317305
R23.350	MAG1822	318.241	1088.83	272.208	0	0	0	0.0359	0.0419998	89.49	2.01	R	d__Bacteria	p__Bacteroidota	c__Bacteroidia	Bacteroidales	f__Muribaculaceae	g__Sodaliphilus	s__Sodaliphilus sp900320245
R23.353	MAG1823	2070.42	2749.36	687.34	0	0	0	<.0001	1.08446e-06	78.57	1.81	R	d__Bacteria	p__Bacteroidota	c__Bacteroidia	Bacteroidales	f__F082	g__Limimorpha	s__
R23.355	MAG1824	170.175	338.854	84.7135	0	0	0	0.0035	0.00478424	93.71	3.65	R	d__Bacteria	p__Firmicutes_A	c__Clostridia	Lachnospirales	f__Lachnospiraceae	g__RUG12461	s__
R23.357	MAG1825	447.076	445.586	111.396	0	0	0	<.0001	8.28023e-06	84.89	7.42	R	d__Bacteria	p__Bacteroidota	c__Bacteroidia	Bacteroidales	f__UBA932	g__Cryptobacteroides	s__Cryptobacteroides sp900318955
R23.358	MAG1826	947.901	3101.43	775.358	0	0	0	<.0001	2.32495e-05	88.87	1.38	R	d__Bacteria	p__Bacteroidota	c__Bacteroidia	Bacteroidales	f__Muribaculaceae	g__Sodaliphilus	s__
R23.361	MAG1827	436.703	501.543	125.386	0	0	0	<.0001	1.08446e-06	91.67	1.59	R	d__Bacteria	p__Bacteroidota	c__Bacteroidia	Bacteroidales	f__UBA932	g__Cryptobacteroides	s__Cryptobacteroides sp902801885
R23.363	MAG1828	172.014	514.152	128.538	6.42343	13.8702	3.46755	0.8034	0.82397	75.78	0	R	d__Bacteria	p__Firmicutes_A	c__Clostridia	Lachnospirales	f__Lachnospiraceae	g__Eubacterium_Q	s__Eubacterium_Q sp000687975
R23.364	MAG1829	171.862	250.319	62.5797	0	0	0	0.0002	0.000400461	60.55	2.4	R	d__Bacteria	p__Bacteroidota	c__Bacteroidia	Bacteroidales	f__Bacteroidaceae	g__UBA3839	s__UBA3839 sp900314125
R23.370	MAG1830	879.126	513.684	128.421	110.488	68.1572	17.0393	<.0001	4.32355e-06	85.31	6.21	R	d__Bacteria	p__Firmicutes_A	c__Clostridia	Oscillospirales	f__Oscillospiraceae	g__Limivicinus	s__
R23.372	MAG1831	638.427	1568.87	392.216	88.2516	153.747	38.4368	0.1508	0.165656	93.29	3.69	R	d__Bacteria	p__Firmicutes_A	c__Clostridia	Oscillospirales	f__Acutalibacteraceae	g__Ruminococcus_E	s__Ruminococcus_E sp902798755
R23.373	MAG1832	162.4	292.744	73.1859	112.787	203.234	50.8086	0.8516	0.868966	58.21	1.01	R	d__Bacteria	p__Firmicutes_A	c__Clostridia	Oscillospirales	f__Acutalibacteraceae	g__Ruminococcus_E	s__
R23.374	MAG1833	5021.88	8403.1	2100.77	0	0	0	<.0001	1.08446e-06	78.15	1.36	R	d__Bacteria	p__Bacteroidota	c__Bacteroidia	Bacteroidales	f__F082	g__Limimorpha	s__Limimorpha sp001543395
R23.375	MAG1834	493.786	1017.26	254.314	0	0	0	0.0002	0.000400461	58.97	2.59	R	d__Bacteria	p__Firmicutes_A	c__Clostridia	Lachnospirales	f__Lachnospiraceae	g__UBA3633	s__UBA3633 sp017449075
R23.381	MAG1835	248.994	206.074	51.5184	0	0	0	<.0001	1.08446e-06	61.48	9.08	R	d__Bacteria	p__Firmicutes_A	c__Clostridia	Lachnospirales	f__Lachnospiraceae	g__NK4A144	s__
R23.383	MAG1836	460.11	1445.76	361.44	0	0	0	0.0035	0.00478424	83.96	0.38	R	d__Bacteria	p__Bacteroidota	c__Bacteroidia	Bacteroidales	f__Muribaculaceae	g__SFRY01	s__
R23.384	MAG1837	331.324	248.726	62.1816	127.548	174.016	43.504	0.0003	0.000419235	50.5	5.03	R	d__Bacteria	p__Firmicutes_A	c__Clostridia	Oscillospirales	f__Ruminococcaceae	g__RUG11783	s__RUG11783 sp017405465
R23.385	MAG1838	997.674	1766.73	441.682	0	0	0	<.0001	6.30507e-05	67.19	0.63	R	d__Bacteria	p__Firmicutes_A	c__Clostridia	Lachnospirales	f__Lachnospiraceae	g__UBA3633	s__
R23.388	MAG1839	1445.43	1655.86	413.964	0	0	0	<.0001	8.28023e-06	92.05	0	R	d__Bacteria	p__Bacteroidota	c__Bacteroidia	Bacteroidales	f__UBA932	g__Egerieousia	s__Egerieousia sp902769525
R23.389	MAG1840	512.716	1795.05	448.763	0	0	0	0.0015	0.00216609	90.24	0.89	R	d__Bacteria	p__Firmicutes_A	c__Clostridia	Lachnospirales	f__Lachnospiraceae	g__JAEELB01	s__JAEELB01 sp016288705
R23.390	MAG1841	4550.11	8705.83	2176.46	0	0	0	<.0001	1.08446e-06	77.93	2.47	R	d__Bacteria	p__Bacteroidota	c__Bacteroidia	Bacteroidales	f__Bacteroidaceae	g__Prevotella	s__Prevotella sp902798285
R23.391	MAG1842	205.811	317.03	79.2576	0	0	0	<.0001	1.08446e-06	88.46	0.7	R	d__Bacteria	p__Spirochaetota	c__Spirochaetia	Treponematales	f__Treponemataceae	g__Treponema_D	s__Treponema_D sp002373205
R23.393	MAG1843	169.017	238.302	59.5754	0	0	0	<.0001	2.32495e-05	74.23	2.95	R	d__Bacteria	p__Firmicutes_C	c__Negativicutes	Selenomonadales	f__Selenomonadaceae	g__UBA3796	s__UBA3796 sp017444295
R23.394	MAG1844	1555.95	1406.67	351.668	0	0	0	<.0001	1.08446e-06	86.56	5.95	R	d__Bacteria	p__Bacteroidota	c__Bacteroidia	Bacteroidales	f__Bacteroidaceae	g__Prevotella	s__Prevotella sp900316985
R23.395	MAG1845	389.229	339.432	84.858	2.47016	9.88063	2.47016	<.0001	1.48978e-06	86.06	4.32	R	d__Bacteria	p__Firmicutes_A	c__Clostridia	Lachnospirales	f__Lachnospiraceae	g__AC2028	s__AC2028 sp902761225
R23.396	MAG1846	425.415	1009.91	252.478	152.137	389.655	97.4137	0.8034	0.82397	72.98	1.12	R	d__Bacteria	p__Firmicutes_A	c__Clostridia	TANB77	f__CAG-508	g__Scatovivens	s__
R23.397	MAG1847	161.221	562.119	140.53	0	0	0	0.0171	0.0210099	95.82	0.79	R	d__Bacteria	p__Firmicutes_C	c__Negativicutes	Selenomonadales	f__Selenomonadaceae	g__Quinella	s__
R23.399	MAG1848	949.401	1878.75	469.688	81.7585	91.6488	22.9122	<.0001	1.09381e-05	86.97	3.53	R	d__Bacteria	p__Firmicutes	c__Bacilli	RF39	f__UBA660	g__RUG12834	s__
R23.400	MAG1849	817.428	1932.94	483.235	21.7258	39.7768	9.94419	0.0013	0.00193367	92.2	1.42	R	d__Bacteria	p__Firmicutes_A	c__Clostridia	Saccharofermentanales	f__Saccharofermentanaceae	g__Saccharofermentans	s__Saccharofermentans sp902775565
R23.403	MAG1850	387.343	612.533	153.133	0	0	0	<.0001	0.000161125	92.38	3.01	R	d__Bacteria	p__Bacteroidota	c__Bacteroidia	Bacteroidales	f__Bacteroidaceae	g__UBA4372	s__UBA4372 sp902779315
R23.404	MAG1851	2330.78	7221.82	1805.45	2416.78	7482.93	1870.73	0.3657	0.386184	77	2.75	R	d__Bacteria	p__Firmicutes_A	c__Clostridia	TANB77	f__CAG-508	g__CAG-269	s__
R23.421	MAG1852	593.112	947.925	236.981	74.7163	66.2844	16.5711	<.0001	6.15744e-05	91.44	1.68	R	d__Bacteria	p__Firmicutes_A	c__Clostridia	Oscillospirales	f__Oscillospiraceae	g__Limivicinus	s__Limivicinus sp900317375
R23.428	MAG1853	1073.04	1615.1	403.774	0	0	0	<.0001	1.08446e-06	90.65	2.3	R	d__Bacteria	p__Bacteroidota	c__Bacteroidia	Bacteroidales	f__UBA932	g__Cryptobacteroides	s__Cryptobacteroides sp902768985
R23.429	MAG1854	560.423	1438.56	359.64	1.86457	7.45829	1.86457	0.0044	0.00586857	98.52	4.9	R	d__Bacteria	p__Spirochaetota	c__Spirochaetia	Treponematales	f__Treponemataceae	g__Treponema_D	s__Treponema_D sp017392945
R23.430	MAG1855	157.45	322.066	80.5166	0	0	0	0.0035	0.00478424	83.54	2.82	R	d__Bacteria	p__Firmicutes_C	c__Negativicutes	Selenomonadales	f__Selenomonadaceae	g__Quinella	s__Quinella sp017427545
R23.432	MAG1856	791.284	1069.83	267.458	0	0	0	<.0001	1.08446e-06	95.12	1.34	R	d__Bacteria	p__Firmicutes_C	c__Negativicutes	Selenomonadales	f__Selenomonadaceae	g__RUG12372	s__RUG12372 sp902782705
R23.433	MAG1857	326.593	486.02	121.505	0	0	0	<.0001	2.32495e-05	72.84	2.48	R	d__Bacteria	p__Firmicutes_A	c__Clostridia	Lachnospirales	f__Lachnospiraceae	g__Butyrivibrio	s__
R23.436	MAG1858	613.393	1154.65	288.663	0	0	0	0.0015	0.00216609	86.19	3.87	R	d__Bacteria	p__Bacteroidota	c__Bacteroidia	Bacteroidales	f__UBA932	g__Cryptobacteroides	s__Cryptobacteroides sp900319685
R23.437	MAG1859	357.465	315.782	78.9456	4.49716	12.3302	3.08256	<.0001	6.62051e-06	58.11	3.83	R	d__Bacteria	p__Firmicutes_A	c__Clostridia	Lachnospirales	f__Lachnospiraceae	g__UBA2868	s__UBA2868 sp002350465
R23.439	MAG1860	473.276	997.356	249.339	0	0	0	<.0001	0.000161125	91.14	0.97	R	d__Bacteria	p__Firmicutes_A	c__Clostridia	Lachnospirales	f__Lachnospiraceae	g__Pseudobutyrivibrio	s__
R23.441	MAG1861	220.466	855.677	213.919	0	0	0	0.1508	0.165656	96.38	7.77	R	d__Bacteria	p__Firmicutes_A	c__Clostridia	Lachnospirales	f__Lachnospiraceae	g__Pseudobutyrivibrio	s__Pseudobutyrivibrio sp017557435
R23.443	MAG1862	895.294	818.957	204.739	0	0	0	<.0001	1.08446e-06	69.66	1.95	R	d__Bacteria	p__Bacteroidota	c__Bacteroidia	Bacteroidales	f__Bacteroidaceae	g__Prevotella	s__Prevotella sp017428805
R24.2	MAG1863	387.432	633.868	158.467	242.786	642.214	160.553	0.2747	0.29724	91.54	1.76	R	d__Bacteria	p__Firmicutes_A	c__Clostridia	Oscillospirales	f__Acutalibacteraceae	g__Ruminococcus_E	s__
R24.6	MAG1864	190.731	364.603	91.1508	0	0	0	0.0002	0.000400461	65.2	1.36	R	d__Bacteria	p__Firmicutes_A	c__Clostridia	Oscillospirales	f__Ruminococcaceae	g__Ruminococcus	s__
R24.7	MAG1865	144.21	335.482	83.8705	0	0	0	0.0171	0.0210099	68.36	1.12	R	d__Bacteria	p__Firmicutes	c__Bacilli	RFN20	f__CAG-826	g__UBA4951	s__UBA4951 sp017468925
R24.11	MAG1866	174.329	341.518	85.3794	0	0	0	0.0015	0.00216609	67.71	2.01	R	d__Bacteria	p__Firmicutes_A	c__Clostridia	Oscillospirales	f__Acutalibacteraceae	g__RUG806	s__
R24.13	MAG1867	137.932	495.509	123.877	22.2295	88.9179	22.2295	0.1703	0.186389	94.68	0.34	R	d__Bacteria	p__Firmicutes_A	c__Clostridia	Oscillospirales	f__Acutalibacteraceae	g__CAG-177	s__
R24.37	MAG1868	242.783	234.647	58.6616	0	0	0	<.0001	1.08446e-06	90.94	3.66	R	d__Bacteria	p__Elusimicrobiota	c__Endomicrobia	Endomicrobiales	f__Endomicrobiaceae	g__RUG658	s__
R24.38	MAG1869	1685.04	3097.43	774.358	552.66	1048.15	262.038	0.3407	0.360754	95.2	0	R	d__Archaea	p__Methanobacteriota	c__Methanobacteria	Methanobacteriales	f__Methanobacteriaceae	g__Methanobrevibacter_A	s__
R24.58	MAG1870	404.834	760.486	190.121	0	0	0	<.0001	0.000161125	79.32	1.9	R	d__Bacteria	p__Firmicutes_A	c__Clostridia	Lachnospirales	f__Lachnospiraceae	g__UBA3633	s__
R24.60	MAG1871	259.816	352.088	88.022	1.68283	6.73131	1.68283	0.0006	0.000956857	79.5	4.03	R	d__Bacteria	p__Firmicutes_A	c__Clostridia	Oscillospirales	f__Ruminococcaceae	g__Firm-04	s__
R24.61	MAG1872	613.405	1013.19	253.297	0	0	0	<.0001	2.32495e-05	96.58	1.12	R	d__Bacteria	p__Bacteroidota	c__Bacteroidia	Bacteroidales	f__Bacteroidaceae	g__UBA4293	s__UBA4293 sp002395835
R24.70	MAG1873	247.972	370.967	92.7417	0	0	0	<.0001	6.30507e-05	85.01	3.47	R	d__Bacteria	p__Bacteroidota	c__Bacteroidia	Bacteroidales	f__Bacteroidaceae	g__UBA4334	s__UBA4334 sp017961965
R24.84	MAG1874	318.627	759.031	189.758	0	0	0	0.0035	0.00478424	79.05	3.85	R	d__Bacteria	p__Fibrobacterota	c__Fibrobacteria	Fibrobacterales	f__Fibrobacteraceae	g__Fibrobacter	s__
R24.88	MAG1875	933.093	1299.41	324.853	1.95516	7.82065	1.95516	<.0001	4.46999e-05	96.2	1.56	R	d__Bacteria	p__Firmicutes_A	c__Clostridia	Lachnospirales	f__Lachnospiraceae	g__UBA1258	s__
R24.93	MAG1876	265.204	459.45	114.863	0	0	0	<.0001	0.000161125	89.93	3.47	R	d__Bacteria	p__Firmicutes_A	c__Clostridia	Oscillospirales	f__Ruminococcaceae	g__Ruminococcus_D	s__
R24.97	MAG1877	203.101	479.101	119.775	35.1811	101.928	25.4819	0.0233	0.028383	97.32	0.67	R	d__Bacteria	p__Firmicutes_A	c__Clostridia	Oscillospirales	f__Acutalibacteraceae	g__Fimenecus	s__
R24.114	MAG1878	302.352	313.817	78.4542	0	0	0	<.0001	6.30507e-05	73.58	8.68	R	d__Bacteria	p__Bacteroidota	c__Bacteroidia	Bacteroidales	f__UBA932	g__Egerieousia	s__Egerieousia sp902780455
R24.119	MAG1879	372.079	700.309	175.077	0	0	0	<.0001	6.30507e-05	96.96	0.89	R	d__Bacteria	p__Firmicutes_A	c__Clostridia	Oscillospirales	f__CAG-272	g__UMGS1696	s__UMGS1696 sp017540285
R24.120	MAG1880	166.977	643.394	160.849	0	0	0	0.1508	0.165656	88.53	2.32	R	d__Bacteria	p__Bacteroidota	c__Bacteroidia	Bacteroidales	f__Muribaculaceae	g__Sodaliphilus	s__Sodaliphilus sp017454355
R24.139	MAG1881	3574.38	8022.36	2005.59	1.44356	5.77422	1.44356	<.0001	4.46999e-05	86.79	3.24	R	d__Bacteria	p__Bacteroidota	c__Bacteroidia	Bacteroidales	f__Muribaculaceae	g__Sodaliphilus	s__Sodaliphilus sp900318255
R24.199	MAG1882	389.078	457.116	114.279	7.59831	21.0524	5.2631	<.0001	1.93055e-06	57.92	6.9	R	d__Bacteria	p__Firmicutes_A	c__Clostridia	Christensenellales	f__CAG-74	g__RUG563	s__
R24.213	MAG1883	3099.56	4582.07	1145.52	0	0	0	<.0001	1.08446e-06	80.36	0.59	R	d__Bacteria	p__Bacteroidota	c__Bacteroidia	Bacteroidales	f__F082	g__Limimorpha	s__Limimorpha sp017395365
R24.293	MAG1884	1493.99	2189.85	547.463	282.327	376.138	94.0345	0.0009	0.00136318	93.05	2.25	R	d__Bacteria	p__Firmicutes	c__Bacilli	RF39	f__UBA660	g__UBA3789	s__
R24.297	MAG1885	1510.99	738.369	184.592	162.575	352.761	88.1903	<.0001	8.28023e-06	94.26	8.78	R	d__Bacteria	p__Firmicutes_C	c__Negativicutes	Acidaminococcales	f__Acidaminococcaceae	g__Succiniclasticum	s__Succiniclasticum sp900315925
R24.298	MAG1886	794.353	1995.76	498.941	0	0	0	0.0006	0.000956857	93.14	1.69	R	d__Bacteria	p__Firmicutes	c__Bacilli	RFN20	f__CAG-826	g__RUG14515	s__
R24.299	MAG1887	510.354	1344.92	336.229	19.5903	51.7677	12.9419	0.0045	0.00608841	99.41	0.35	R	d__Bacteria	p__Firmicutes_A	c__Clostridia	Saccharofermentanales	f__Saccharofermentanaceae	g__Saccharofermentans	s__Saccharofermentans sp902782125
R24.308	MAG1888	437.415	784.996	196.249	54.8121	120.305	30.0762	0.0159	0.0202415	99.15	2.13	R	d__Bacteria	p__Firmicutes_A	c__Clostridia	Saccharofermentanales	f__Saccharofermentanaceae	g__Saccharofermentans	s__
R24.309	MAG1889	307.64	829.34	207.335	0	0	0	0.0359	0.0419998	91.27	0.5	R	d__Bacteria	p__Bacteroidota	c__Bacteroidia	Bacteroidales	f__UBA932	g__Cryptobacteroides	s__Cryptobacteroides sp017445755
R24.310	MAG1890	347.603	579.567	144.892	0	0	0	0.0002	0.000400461	81.51	2.15	R	d__Bacteria	p__Bacteroidota	c__Bacteroidia	Bacteroidales	f__P3	g__UBA1711	s__
R24.311	MAG1891	505.582	1455.38	363.844	0	0	0	0.0079	0.0101688	90.12	0.93	R	d__Bacteria	p__Bacteroidota	c__Bacteroidia	Bacteroidales	f__Bacteroidaceae	g__Prevotella	s__Prevotella sp900315775
R24.313	MAG1892	439.905	626.401	156.6	0	0	0	<.0001	2.32495e-05	62.09	2.35	R	d__Bacteria	p__Bacteroidota	c__Bacteroidia	Bacteroidales	f__Bacteroidaceae	g__Prevotella	s__
R24.316	MAG1893	378.804	641.796	160.449	0	0	0	<.0001	2.32495e-05	87.43	6.18	R	d__Bacteria	p__Firmicutes_A	c__Clostridia	Oscillospirales	f__Oscillospiraceae	g__RGIG7114	s__RGIG7114 sp017542425
R24.317	MAG1894	48.6524	194.61	48.6524	40.6142	162.457	40.6142	0.9642	0.9678	61.77	3.25	R	d__Bacteria	p__Firmicutes_A	c__Clostridia	Christensenellales	f__CAG-138	g__UBA3792	s__
R24.322	MAG1895	356.885	303.357	75.8393	0	0	0	<.0001	8.28023e-06	56.47	8.01	R	d__Bacteria	p__Firmicutes_A	c__Clostridia	Lachnospirales	f__Lachnospiraceae	g__UBA3633	s__
R24.324	MAG1896	91.8094	367.238	91.8094	0	0	0	0.3173	0.337339	75.45	2.25	R	d__Bacteria	p__Firmicutes	c__Bacilli	RFN20	f__CAG-826	g__Enteromonas	s__Enteromonas sp900316365
R24.325	MAG1897	477.948	1052.3	263.074	0	0	0	0.0171	0.0210099	93.26	1.12	R	d__Bacteria	p__Firmicutes	c__Bacilli	RFN20	f__CAG-826	g__UBA3207	s__
R24.340	MAG1898	225.223	424.642	106.161	4.88749	13.9921	3.49802	<.0001	8.61278e-05	95.21	4.19	R	d__Bacteria	p__Firmicutes_A	c__Clostridia	Oscillospirales	f__Ruminococcaceae	g__Ruminococcus_D	s__Ruminococcus_D albus_A
R24.346	MAG1899	418.783	889.945	222.486	0	0	0	0.0006	0.000956857	89.53	1.89	R	d__Bacteria	p__Bacteroidota	c__Bacteroidia	Bacteroidales	f__UBA3663	g__UBA3663	s__UBA3663 sp900319235
R24.349	MAG1900	317.945	1146.85	286.713	0	0	0	0.0359	0.0419998	96.98	0.67	R	d__Bacteria	p__Firmicutes_A	c__Clostridia	Oscillospirales	f__Ruminococcaceae	g__Firm-04	s__Firm-04 sp001940925
R24.350	MAG1901	1284.4	4766.71	1191.68	0	0	0	0.0737	0.0837988	94.09	0.02	R	d__Bacteria	p__Bacteroidota	c__Bacteroidia	Bacteroidales	f__Paludibacteraceae	g__UBA1181	s__UBA1181 sp017649635
R24.352	MAG1902	797.841	1815.16	453.789	1.29297	5.17186	1.29297	0.0563	0.0654699	91.14	1.36	R	d__Bacteria	p__Bacteroidota	c__Bacteroidia	Bacteroidales	f__Bacteroidaceae	g__UBA4372	s__
R24.354	MAG1903	7967.4	21832.2	5458.06	0	0	0	0.0015	0.00216609	93.95	0.49	R	d__Bacteria	p__Bacteroidota	c__Bacteroidia	Bacteroidales	f__Bacteroidaceae	g__Prevotella	s__Prevotella sp900313615
R24.356	MAG1904	514.69	1580.78	395.195	0	0	0	<.0001	2.90589e-06	97.55	2.82	R	d__Bacteria	p__Spirochaetota	c__Spirochaetia	Treponematales	f__Treponemataceae	g__UBA1240	s__UBA1240 sp001603145
R24.361	MAG1905	873.766	1294.71	323.677	5.11332	14.1118	3.52794	<.0001	6.62051e-06	93.68	2.78	R	d__Bacteria	p__Firmicutes_A	c__Clostridia	Lachnospirales	f__Lachnospiraceae	g__UBA2868	s__UBA2868 sp902779305
R24.362	MAG1906	1561.31	6113.66	1528.42	44.6716	157.996	39.499	0.5915	0.613652	98.58	4.26	R	d__Bacteria	p__Firmicutes_A	c__Clostridia	Saccharofermentanales	f__Saccharofermentanaceae	g__Saccharofermentans	s__
R24.365	MAG1907	119.21	476.841	119.21	0	0	0	0.3173	0.337339	92.11	2.49	R	d__Bacteria	p__Firmicutes_A	c__Clostridia	Lachnospirales	f__Lachnospiraceae	g__UBA1258	s__
R24.367	MAG1908	804.54	767.956	191.989	0	0	0	<.0001	8.28023e-06	85.7	1.65	R	d__Bacteria	p__Bacteroidota	c__Bacteroidia	Bacteroidales	f__Bacteroidaceae	g__Prevotella	s__Prevotella sp002393725
R24.372	MAG1909	537.221	911.508	227.877	0	0	0	<.0001	8.28023e-06	71.06	5.09	R	d__Bacteria	p__Bacteroidota	c__Bacteroidia	Bacteroidales	f__Bacteroidaceae	g__Prevotella	s__Prevotella sp902771445
R24.374	MAG1910	388.352	563.711	140.928	0	0	0	0.0002	0.000400461	89.07	1.63	R	d__Bacteria	p__Bacteroidota	c__Bacteroidia	Bacteroidales	f__Bacteroidaceae	g__UBA1786	s__UBA1786 sp017480685
R24.378	MAG1911	889.076	1225.44	306.36	27.4357	48.7175	12.1794	0.014	0.0178067	97.67	0.24	R	d__Bacteria	p__Firmicutes_A	c__Clostridia	Lachnospirales	f__Lachnospiraceae	g__FD2005	s__FD2005 sp017392525
R24.380	MAG1912	3653.65	8528.82	2132.2	38.918	103.64	25.9101	0.0015	0.00216609	93.28	5.91	R	d__Bacteria	p__Bacteroidota	c__Bacteroidia	Bacteroidales	f__P3	g__UBA1711	s__UBA1711 sp900314925
R24.383	MAG1913	897.982	1023.23	255.809	0	0	0	<.0001	1.08446e-06	90.24	0.98	R	d__Bacteria	p__Bacteroidota	c__Bacteroidia	Bacteroidales	f__UBA932	g__Cryptobacteroides	s__Cryptobacteroides sp900318565
R24.386	MAG1914	876.53	1147.31	286.828	0	0	0	<.0001	8.28023e-06	54.29	6.9	R	d__Bacteria	p__Bacteroidota	c__Bacteroidia	Bacteroidales	f__UBA932	g__Cryptobacteroides	s__Cryptobacteroides sp900321655
R24.387	MAG1915	285.942	337.748	84.4371	2.61215	10.4486	2.61215	<.0001	1.48978e-06	90.09	3.2	R	d__Bacteria	p__Firmicutes_A	c__Clostridia	Lachnospirales	f__Lachnospiraceae	g__AC2028	s__AC2028 sp902761225
R24.389	MAG1916	291.927	363.83	90.9576	0	0	0	<.0001	2.90589e-06	74.87	2.48	R	d__Bacteria	p__Firmicutes_A	c__Clostridia	Oscillospirales	f__Oscillospiraceae	g__ER4	s__
R24.390	MAG1917	748.143	792.105	198.026	0	0	0	<.0001	2.90589e-06	73.12	1.91	R	d__Bacteria	p__Bacteroidota	c__Bacteroidia	Bacteroidales	f__Bacteroidaceae	g__Prevotella	s__Prevotella sp902782305
R24.391	MAG1918	1376.47	1842.45	460.613	0	0	0	<.0001	1.08446e-06	88.52	1.43	R	d__Bacteria	p__Bacteroidota	c__Bacteroidia	Bacteroidales	f__UBA932	g__Cryptobacteroides	s__Cryptobacteroides sp017478685
R24.396	MAG1919	179.924	598.184	149.546	0	0	0	0.0035	0.00478424	93.29	0.02	R	d__Bacteria	p__Firmicutes_A	c__Clostridia	Oscillospirales	f__Ruminococcaceae	g__Ruminiclostridium_E	s__
R24.397	MAG1920	404.693	963.425	240.856	0	0	0	0.0035	0.00478424	95.13	0.94	R	d__Bacteria	p__Bacteroidota	c__Bacteroidia	Bacteroidales	f__UBA932	g__Cryptobacteroides	s__Cryptobacteroides sp017627955
R24.399	MAG1921	161.85	632.464	158.116	1.79638	7.18551	1.79638	0.5025	0.524974	76.96	0	R	d__Bacteria	p__Firmicutes_A	c__Clostridia	Oscillospirales	f__Ruminococcaceae	g__Ruminococcus_D	s__
R24.400	MAG1922	6433.44	8205.34	2051.33	0	0	0	<.0001	1.08446e-06	88.17	4.89	R	d__Bacteria	p__Bacteroidota	c__Bacteroidia	Bacteroidales	f__Bacteroidaceae	g__Prevotella	s__Prevotella sp900110085
R24.404	MAG1923	1712.45	1939.99	484.998	0	0	0	<.0001	1.08446e-06	88.57	4.85	R	d__Bacteria	p__Bacteroidota	c__Bacteroidia	Bacteroidales	f__Bacteroidaceae	g__Prevotella	s__
R24.405	MAG1924	2057.24	2623.6	655.901	530.311	751.945	187.986	0.0342	0.0413042	93.82	2.25	R	d__Bacteria	p__Firmicutes	c__Bacilli	RF39	f__UBA660	g__UBA3789	s__UBA3789 sp902793315
R24.406	MAG1925	339.668	624.515	156.129	142.352	252.139	63.0347	1	1	54.3	1.68	R	d__Bacteria	p__Firmicutes_A	c__Clostridia	TANB77	f__CAG-508	g__CAG-492	s__
R24.408	MAG1926	1074.32	926.963	231.741	0	0	0	<.0001	2.90589e-06	84.23	0.48	R	d__Bacteria	p__Bacteroidota	c__Bacteroidia	Bacteroidales	f__UBA932	g__Cryptobacteroides	s__Cryptobacteroides sp017477465
R24.409	MAG1927	434.712	1293.69	323.423	0	0	0	<.0001	1.08446e-06	92.31	1.17	R	d__Bacteria	p__Spirochaetota	c__Spirochaetia	Treponematales	f__Treponemataceae	g__Treponema_D	s__Treponema_D sp002373205
R24.411	MAG1928	1694.2	2538.5	634.625	453.598	718.53	179.632	0.0314	0.0378877	94.59	2.25	R	d__Bacteria	p__Firmicutes	c__Bacilli	RF39	f__UBA660	g__UBA3789	s__UBA3789 sp002369415
R24.412	MAG1929	207.84	304.421	76.1052	10.8031	43.2124	10.8031	<.0001	7.25892e-05	59.57	5.26	R	d__Bacteria	p__Firmicutes_A	c__Clostridia	Lachnospirales	f__Lachnospiraceae	g__UBA2868	s__
R24.413	MAG1930	915.35	1073.84	268.459	25.1141	45.5486	11.3871	<.0001	3.30545e-06	95.51	1.12	R	d__Bacteria	p__Firmicutes	c__Bacilli	RF39	f__UBA660	g__RUG12783	s__
R24.416	MAG1931	344.141	399.393	99.8482	16.1492	34.9667	8.74166	<.0001	2.90589e-06	78.64	7.86	R	d__Bacteria	p__Firmicutes_A	c__Clostridia	Oscillospirales	f__Oscillospiraceae	g__UBA738	s__
R24.420	MAG1932	201.465	751.731	187.933	0	0	0	0.0737	0.0837988	91.23	1.68	R	d__Bacteria	p__Firmicutes_A	c__Clostridia	Oscillospirales	f__Acutalibacteraceae	g__UBA1425	s__
R24.423	MAG1933	412.158	805.034	201.258	541.599	1539.6	384.901	0.7605	0.78099	65.94	1.33	Ce	d__Bacteria	p__Firmicutes	c__Bacilli	RF39	f__UBA660	g__UMGS1613	s__
R24.424	MAG1934	1470.01	2097.35	524.337	0	0	0	<.0001	1.08446e-06	91.44	1.02	R	d__Bacteria	p__Bacteroidota	c__Bacteroidia	Bacteroidales	f__Bacteroidaceae	g__UBA4334	s__UBA4334 sp900316975
R24.426	MAG1935	975.57	1270.89	317.722	169.134	129.022	32.2555	0.0005	0.000842279	78.65	2.25	R	d__Bacteria	p__Firmicutes	c__Bacilli	RF39	f__UBA660	g__CAG-1193	s__
R24.427	MAG1936	952.21	1551.07	387.768	0	0	0	0.0035	0.00478424	88.6	1.2	R	d__Bacteria	p__Bacteroidota	c__Bacteroidia	Bacteroidales	f__Bacteroidaceae	g__Prevotella	s__Prevotella sp017423565
R24.428	MAG1937	5822.55	5617.02	1404.25	0	0	0	<.0001	1.08446e-06	81.78	0.95	R	d__Bacteria	p__Bacteroidota	c__Bacteroidia	Bacteroidales	f__UBA932	g__Cryptobacteroides	s__Cryptobacteroides sp017447815
R24.429	MAG1938	395.547	546.854	136.714	0	0	0	<.0001	0.000161125	75.94	1.92	R	d__Bacteria	p__Bacteroidota	c__Bacteroidia	Bacteroidales	f__Bacteroidaceae	g__Alloprevotella	s__Alloprevotella sp003265305
R24.431	MAG1939	685.209	829.585	207.396	0	0	0	<.0001	2.90589e-06	76.79	0.75	R	d__Bacteria	p__Firmicutes_A	c__Clostridia	Lachnospirales	f__Lachnospiraceae	g__RUG11977	s__RUG11977 sp016287095
R25.9	MAG1940	497.709	374.45	93.6126	0	0	0	<.0001	1.08446e-06	63.3	7.86	R	d__Bacteria	p__Bacteroidota	c__Bacteroidia	Bacteroidales	f__UBA932	g__Cryptobacteroides	s__Cryptobacteroides sp902780935
R25.15	MAG1941	253.007	321.506	80.3765	0	0	0	<.0001	6.30507e-05	92.02	4.65	R	d__Bacteria	p__Firmicutes	c__Bacilli	RFN20	f__CAG-826	g__UBA4951	s__UBA4951 sp902802355
R25.23	MAG1942	52.238	208.952	52.238	7.80488	23.9406	5.98515	0.602	0.624212	58.09	1.3	R	d__Bacteria	p__Firmicutes	c__Bacilli	Lactobacillales	f__Streptococcaceae	g__Streptococcus	s__Streptococcus infantarius
R25.40	MAG1943	1361.38	2428.11	607.028	316.288	464.81	116.202	0.3141	0.337339	72.74	0.8	R	d__Archaea	p__Methanobacteriota	c__Methanobacteria	Methanobacteriales	f__Methanobacteriaceae	g__Methanobrevibacter_B	s__Methanobrevibacter_B sp900314605
R25.51	MAG1944	145.757	276.977	69.2443	0	0	0	0.0015	0.00216609	66.02	3.66	R	d__Bacteria	p__Bacteroidota	c__Bacteroidia	Bacteroidales	f__Muribaculaceae	g__Sodaliphilus	s__Sodaliphilus sp002353885
R25.62	MAG1945	171.726	186.719	46.6798	82.7554	236.367	59.0916	0.0055	0.00731186	74.58	2.35	R	d__Bacteria	p__Firmicutes_A	c__Clostridia	Oscillospirales	f__Ruminococcaceae	g__Ruminococcus	s__
R25.67	MAG1946	2754.2	6844.83	1711.21	0	0	0	<.0001	2.32495e-05	96.55	6.9	R	d__Bacteria	p__Bacteroidota	c__Bacteroidia	Bacteroidales	f__Muribaculaceae	g__Sodaliphilus	s__Sodaliphilus sp900318255
R25.78	MAG1947	189.24	285.162	71.2904	63.3829	86.0212	21.5053	0.2486	0.269872	75.88	5.82	R	d__Bacteria	p__Firmicutes_A	c__Clostridia	Lachnospirales	f__Lachnospiraceae	g__CAG-791	s__CAG-791 sp902789735
R25.85	MAG1948	4057.07	8949.39	2237.35	0	0	0	<.0001	1.08446e-06	95.43	4.35	R	d__Bacteria	p__Bacteroidota	c__Bacteroidia	Bacteroidales	f__F082	g__Limimorpha	s__
R25.87	MAG1949	179.336	83.0466	20.7617	481.658	394.896	98.7239	0.0002	0.000389495	59.47	1.04	Ce	d__Bacteria	p__Bacteroidota	c__Bacteroidia	Chitinophagales	f__Chitinophagaceae	g__Sediminibacterium	s__Sediminibacterium magnilacihabitans
R25.88	MAG1950	293.268	828.478	207.119	228.359	616.09	154.022	0.6476	0.668246	90.87	4.7	R	d__Bacteria	p__Firmicutes_A	c__Clostridia	Oscillospirales	f__Acutalibacteraceae	g__Ruminococcus_E	s__
R25.93	MAG1951	336.277	616.155	154.039	0	0	0	<.0001	2.90589e-06	90.53	6.05	R	d__Bacteria	p__Spirochaetota	c__Spirochaetia	Treponematales	f__Treponemataceae	g__Treponema_D	s__Treponema_D sp002391235
R25.106	MAG1952	236.734	379.202	94.8006	0	0	0	0.0015	0.00216609	80.67	1.57	R	d__Bacteria	p__Firmicutes	c__Bacilli	Acholeplasmatales	f__Anaeroplasmataceae	g__Anaeroplasma	s__
R25.110	MAG1953	474.871	587.424	146.856	0	0	0	<.0001	6.30507e-05	92.64	3.89	R	d__Bacteria	p__Bacteroidota	c__Bacteroidia	Bacteroidales	f__Bacteroidaceae	g__Prevotella	s__Prevotella sp900315455
R25.133	MAG1954	1537.26	731.674	182.918	0	0	0	<.0001	1.08446e-06	96.77	0	R	d__Bacteria	p__Bacteroidota	c__Bacteroidia	Bacteroidales	f__WCHB1-69	g__UBA1195	s__UBA1195 sp002309855
R25.220	MAG1955	3524.33	8517.28	2129.32	14.5465	58.186	14.5465	0.0251	0.0304689	97.85	0.54	R	d__Bacteria	p__Bacteroidota	c__Bacteroidia	Bacteroidales	f__P3	g__Phil12	s__Phil12 sp900314725
R25.262	MAG1956	218.019	339.554	84.8884	0	0	0	0.0035	0.00478424	66.23	8.88	R	d__Bacteria	p__Firmicutes_C	c__Negativicutes	Selenomonadales	f__Selenomonadaceae	g__Quinella	s__
R25.275	MAG1957	924.201	2121.45	530.362	190.136	363.038	90.7595	0.2754	0.297866	94.63	2.41	R	d__Bacteria	p__Firmicutes_A	c__Clostridia	Oscillospirales	f__Acutalibacteraceae	g__Ruminococcus_E	s__Ruminococcus_E sp902798755
R25.285	MAG1958	2401.47	928.003	232.001	0	0	0	<.0001	1.08446e-06	50.89	2.93	R	d__Bacteria	p__Bacteroidota	c__Bacteroidia	Bacteroidales	f__Bacteroidaceae	g__Prevotella	s__
R25.286	MAG1959	864.647	2044.15	511.037	267.741	454.305	113.576	0.0314	0.0378877	63.17	0.95	R	d__Bacteria	p__Patescibacteria	c__Saccharimonadia	Saccharimonadales	f__Nanosyncoccaceae	g__Nanosyncoccus	s__
R25.287	MAG1960	613.256	1320.02	330.005	0	0	0	<.0001	1.08446e-06	95.97	0.76	R	d__Bacteria	p__Firmicutes_A	c__Clostridia	Oscillospirales	f__Ruminococcaceae	g__Ruminiclostridium_E	s__Ruminiclostridium_E sp902780695
R25.290	MAG1961	1049.19	1160.67	290.168	0	0	0	<.0001	1.08446e-06	53.95	3.1	R	d__Bacteria	p__Bacteroidota	c__Bacteroidia	Bacteroidales	f__UBA932	g__Cryptobacteroides	s__Cryptobacteroides sp902794615
R25.293	MAG1962	554.859	1480.2	370.051	169.768	337.962	84.4905	0.8063	0.826624	59.11	0.85	R	d__Bacteria	p__Patescibacteria	c__Saccharimonadia	Saccharimonadales	f__Nanosyncoccaceae	g__Nanosyncoccus	s__
R25.315	MAG1963	189.59	404.309	101.077	208.69	478.989	119.747	0.8314	0.849748	84.05	4.19	Ce	d__Bacteria	p__Firmicutes_A	c__Clostridia	Oscillospirales	f__Acutalibacteraceae	g__Ruminococcus_E	s__
R25.330	MAG1964	565.439	1279.27	319.818	199.985	294.004	73.501	0.5072	0.529654	84.17	0	R	d__Bacteria	p__Patescibacteria	c__Saccharimonadia	Saccharimonadales	f__Nanosyncoccaceae	g__Nanosyncoccus	s__
R25.333	MAG1965	214.082	494.878	123.72	67.7564	156.495	39.1236	0.2191	0.238431	61.03	0	R	d__Bacteria	p__Patescibacteria	c__Saccharimonadia	Saccharimonadales	f__Nanosyncoccaceae	g__Nanosyncoccus	s__
R25.347	MAG1966	380.631	359.462	89.8656	0	0	0	<.0001	1.08446e-06	95.31	9.14	R	d__Bacteria	p__Firmicutes_A	c__Clostridia	Lachnospirales	f__Lachnospiraceae	g__NK4A144	s__NK4A144 sp902782655
R25.351	MAG1967	524.63	410.224	102.556	0	0	0	<.0001	1.08446e-06	89.08	2.11	R	d__Bacteria	p__Firmicutes_A	c__Clostridia	Lachnospirales	f__Lachnospiraceae	g__Butyrivibrio	s__Butyrivibrio sp015056585
R25.352	MAG1968	2938.73	5485.75	1371.44	0	0	0	<.0001	6.30507e-05	94.26	9.54	R	d__Bacteria	p__Bacteroidota	c__Bacteroidia	Bacteroidales	f__Bacteroidaceae	g__Prevotella	s__Prevotella sp902778535
R25.354	MAG1969	533.955	583.577	145.894	0	0	0	<.0001	6.30507e-05	91.27	4.09	R	d__Bacteria	p__Bacteroidota	c__Bacteroidia	Bacteroidales	f__Bacteroidaceae	g__UBA4372	s__UBA4372 sp902779315
R25.355	MAG1970	2466.69	2857.45	714.362	0	0	0	<.0001	2.90589e-06	86.46	1.98	R	d__Bacteria	p__Bacteroidota	c__Bacteroidia	Bacteroidales	f__Bacteroidaceae	g__Prevotella	s__Prevotella sp017508965
R25.359	MAG1971	463.482	1266.77	316.692	36.3975	100.551	25.1378	0.8956	0.910711	99.29	0.71	R	d__Bacteria	p__Firmicutes_A	c__Clostridia	Saccharofermentanales	f__Saccharofermentanaceae	g__Firm-16	s__
R25.361	MAG1972	3042.32	4926.11	1231.53	0	0	0	<.0001	6.30507e-05	86.25	0.38	R	d__Bacteria	p__Bacteroidota	c__Bacteroidia	Bacteroidales	f__Muribaculaceae	g__Sodaliphilus	s__Sodaliphilus sp900319525
R25.363	MAG1973	400.588	728.196	182.049	0	0	0	<.0001	2.32495e-05	79.43	1.8	R	d__Bacteria	p__Bacteroidota	c__Bacteroidia	Bacteroidales	f__Bacteroidaceae	g__UBA4372	s__
R25.366	MAG1974	1903.72	1189.36	297.34	0	0	0	<.0001	1.08446e-06	77.04	5.17	R	d__Bacteria	p__Bacteroidota	c__Bacteroidia	Bacteroidales	f__UBA932	g__Cryptobacteroides	s__
R25.370	MAG1975	208.031	462.358	115.59	0	0	0	0.0171	0.0210099	78.55	3.39	R	d__Bacteria	p__Bacteroidota	c__Bacteroidia	Bacteroidales	f__Bacteroidaceae	g__UBA4372	s__
R25.376	MAG1976	295.532	434.207	108.552	0	0	0	<.0001	8.28023e-06	91.12	3.08	R	d__Bacteria	p__Firmicutes_A	c__Clostridia	Lachnospirales	f__Lachnospiraceae	g__SIG280	s__
R25.378	MAG1977	443.412	512.234	128.058	0	0	0	<.0001	1.08446e-06	94.52	5.6	R	d__Bacteria	p__Bacteroidota	c__Bacteroidia	Bacteroidales	f__UBA932	g__Cryptobacteroides	s__Cryptobacteroides sp017437825
R25.387	MAG1978	1109.12	540.271	135.068	3.87101	10.7	2.67499	<.0001	1.93055e-06	83.64	5.64	R	d__Bacteria	p__Firmicutes_C	c__Negativicutes	Acidaminococcales	f__Acidaminococcaceae	g__Succiniclasticum	s__Succiniclasticum sp900315925
R25.393	MAG1979	819.32	762.631	190.658	15.9529	34.5105	8.62763	<.0001	2.40898e-06	93.46	1.51	R	d__Bacteria	p__Firmicutes_A	c__Clostridia	Oscillospirales	f__Oscillospiraceae	g__RGIG7114	s__
R25.401	MAG1980	701.076	614.562	153.64	386.245	257.296	64.324	0.0648	0.0751511	56.71	1.34	R	d__Bacteria	p__Firmicutes_A	c__Clostridia	Oscillospirales	f__Oscillospiraceae	g__UBA2922	s__UBA2922 sp905236515
R25.403	MAG1981	491.3	528.17	132.042	0	0	0	<.0001	2.90589e-06	90	3.08	R	d__Bacteria	p__Bacteroidota	c__Bacteroidia	Bacteroidales	f__Bacteroidaceae	g__UBA4372	s__UBA4372 sp902763865
R25.405	MAG1982	562.519	872.287	218.072	142.055	160.073	40.0182	0.4018	0.422956	60.56	0.76	R	d__Bacteria	p__Firmicutes_A	c__Clostridia	TANB77	f__CAG-508	g__CAG-492	s__
R25.406	MAG1983	499.819	604.858	151.214	62.0594	110.578	27.6446	<.0001	0.000130629	70.61	7.33	R	d__Bacteria	p__Chloroflexota	c__Anaerolineae	Anaerolineales	f__Anaerolineaceae	g__Flexilinea	s__Flexilinea sp017417055
R25.408	MAG1984	762.258	1737.7	434.426	165.231	451.35	112.838	0.0005	0.000863715	90.7	7.87	R	d__Bacteria	p__Firmicutes	c__Bacilli	RF39	f__UBA660	g__RUG13868	s__
R25.410	MAG1985	684.967	813.387	203.347	57.9564	104.57	26.1424	<.0001	3.891e-05	60.19	0.35	R	d__Bacteria	p__Firmicutes_A	c__Clostridia	Christensenellales	f__CAG-74	g__GCA-900199385	s__
R25.411	MAG1986	681.537	796.292	199.073	0	0	0	<.0001	1.08446e-06	87.38	4.3	R	d__Bacteria	p__Bacteroidota	c__Bacteroidia	Bacteroidales	f__UBA932	g__Cryptobacteroides	s__Cryptobacteroides sp902785825
R25.418	MAG1987	1042.49	709.564	177.391	0	0	0	<.0001	1.08446e-06	90.51	0.68	R	d__Bacteria	p__Bacteroidota	c__Bacteroidia	Bacteroidales	f__Bacteroidaceae	g__UBA4334	s__UBA4334 sp900316975
R25.423	MAG1988	378.625	669.466	167.366	0	0	0	0.0015	0.00216609	85.41	2.2	R	d__Bacteria	p__Fibrobacterota	c__Fibrobacteria	Fibrobacterales	f__Fibrobacteraceae	g__Fibrobacter	s__Fibrobacter sp002210285
R25.426	MAG1989	120.907	336.629	84.1574	13.2027	37.9105	9.47762	0.3192	0.339227	68.73	4.24	R	d__Bacteria	p__Firmicutes	c__Bacilli	RF39	f__UBA660	g__RUG13868	s__
R25.428	MAG1990	795.944	1022.82	255.705	198.411	136.17	34.0424	0.0059	0.00791056	67.61	2.8	R	d__Bacteria	p__Firmicutes_A	c__Clostridia	TANB77	f__CAG-508	g__CAG-269	s__
R25.429	MAG1991	1019.19	1018.49	254.623	0	0	0	<.0001	1.08446e-06	89.34	5.62	R	d__Bacteria	p__Bacteroidota	c__Bacteroidia	Bacteroidales	f__Bacteroidaceae	g__Prevotella	s__
R25.431	MAG1992	340.516	926.409	231.602	0	0	0	0.0035	0.00478424	88.44	0	R	d__Bacteria	p__Bacteroidota	c__Bacteroidia	Bacteroidales	f__P3	g__UBA1217	s__UBA1217 sp017429685
R25.432	MAG1993	910.232	828.921	207.23	0	0	0	<.0001	1.08446e-06	91.67	0.87	R	d__Bacteria	p__Bacteroidota	c__Bacteroidia	Bacteroidales	f__UBA932	g__Cryptobacteroides	s__Cryptobacteroides sp900318565
R25.434	MAG1994	1204.55	2129.24	532.309	565.641	722.569	180.642	0.3	0.323551	79.45	4.31	R	d__Bacteria	p__Firmicutes	c__Bacilli	RF39	f__UBA660	g__RUG13038	s__
R25.435	MAG1995	2534.31	4431.9	1107.97	0	0	0	<.0001	1.08446e-06	62.82	1.55	R	d__Bacteria	p__Bacteroidota	c__Bacteroidia	Bacteroidales	f__Bacteroidaceae	g__Prevotella	s__Prevotella sp900315525
R25.437	MAG1996	254.014	601.457	150.364	5.44443	21.7777	5.44443	0.1361	0.152927	92.72	0.97	R	d__Bacteria	p__Firmicutes_A	c__Clostridia	Lachnospirales	f__Lachnospiraceae	g__NK4A144	s__
R25.439	MAG1997	784.958	730.741	182.685	0	0	0	<.0001	2.90589e-06	82.32	6.17	R	d__Bacteria	p__Bacteroidota	c__Bacteroidia	Bacteroidales	f__Bacteroidaceae	g__Prevotella	s__
R25.441	MAG1998	300.202	372.799	93.1997	0	0	0	<.0001	6.30507e-05	67.92	4.04	R	d__Bacteria	p__Firmicutes_C	c__Negativicutes	Selenomonadales	f__Selenomonadaceae	g__UBA9786	s__UBA9786 sp902785705
[truncated: 360 more rows]
